# Supplementary material for: Phenotypic Subtyping and Re-Analysis of Existing Methylation Data from Autistic Probands in Simplex Families Reveal ASD Subtype-Associated Differentially Methylated Genes and Biological Functions
Source: MDPI journal article supplement (doi:10.3390/ijms21186877), 2020-09-19

# List of Supplementary Figures

Figure S1. |DiffScore| vs. log2 Fold-change values for all groups

Figure S2. Gene network associated with DMGs involved in neuritogenesis in the severely language-impaired subgroup

Figure S3. Gene network associated with DMGs involved in abnormal morphology of neurons in the intermediate subgroup

Figure S4. Gene network associated with DMGs involved in sensory system development in the mild subgroup

Figure S5. Gene network associated with DMGs involved in cognitive impairment in the severely language-impaired subgroup

Figure S6. Gene network associated with DMGs involved in motor dysfunction in the severely language-impaired subgroup

Figure S7. Gene network associated with DMGs involved in schizophrenia in the intermediate subgroup

Figure S8. Gene network associated with DMGs involved in schizophrenia in the mild subgroup

Figure S9. Hierarchical layout of a top gene network of DMGs associated with ASD and ID in the severely language-impaired subgroup

Fig. S1

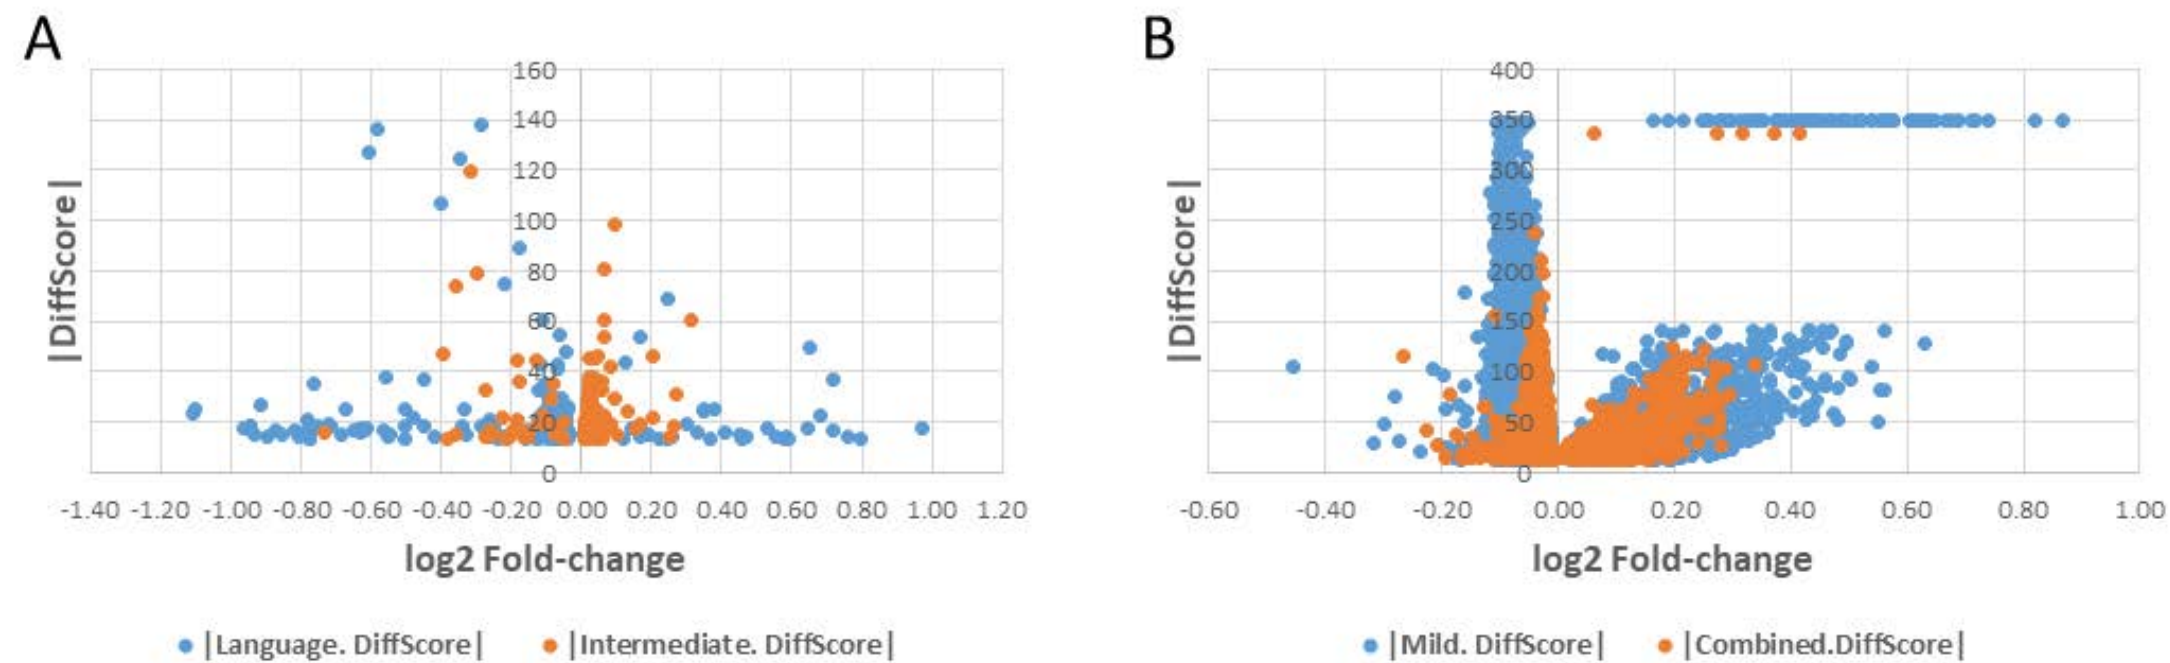

Fig. S2

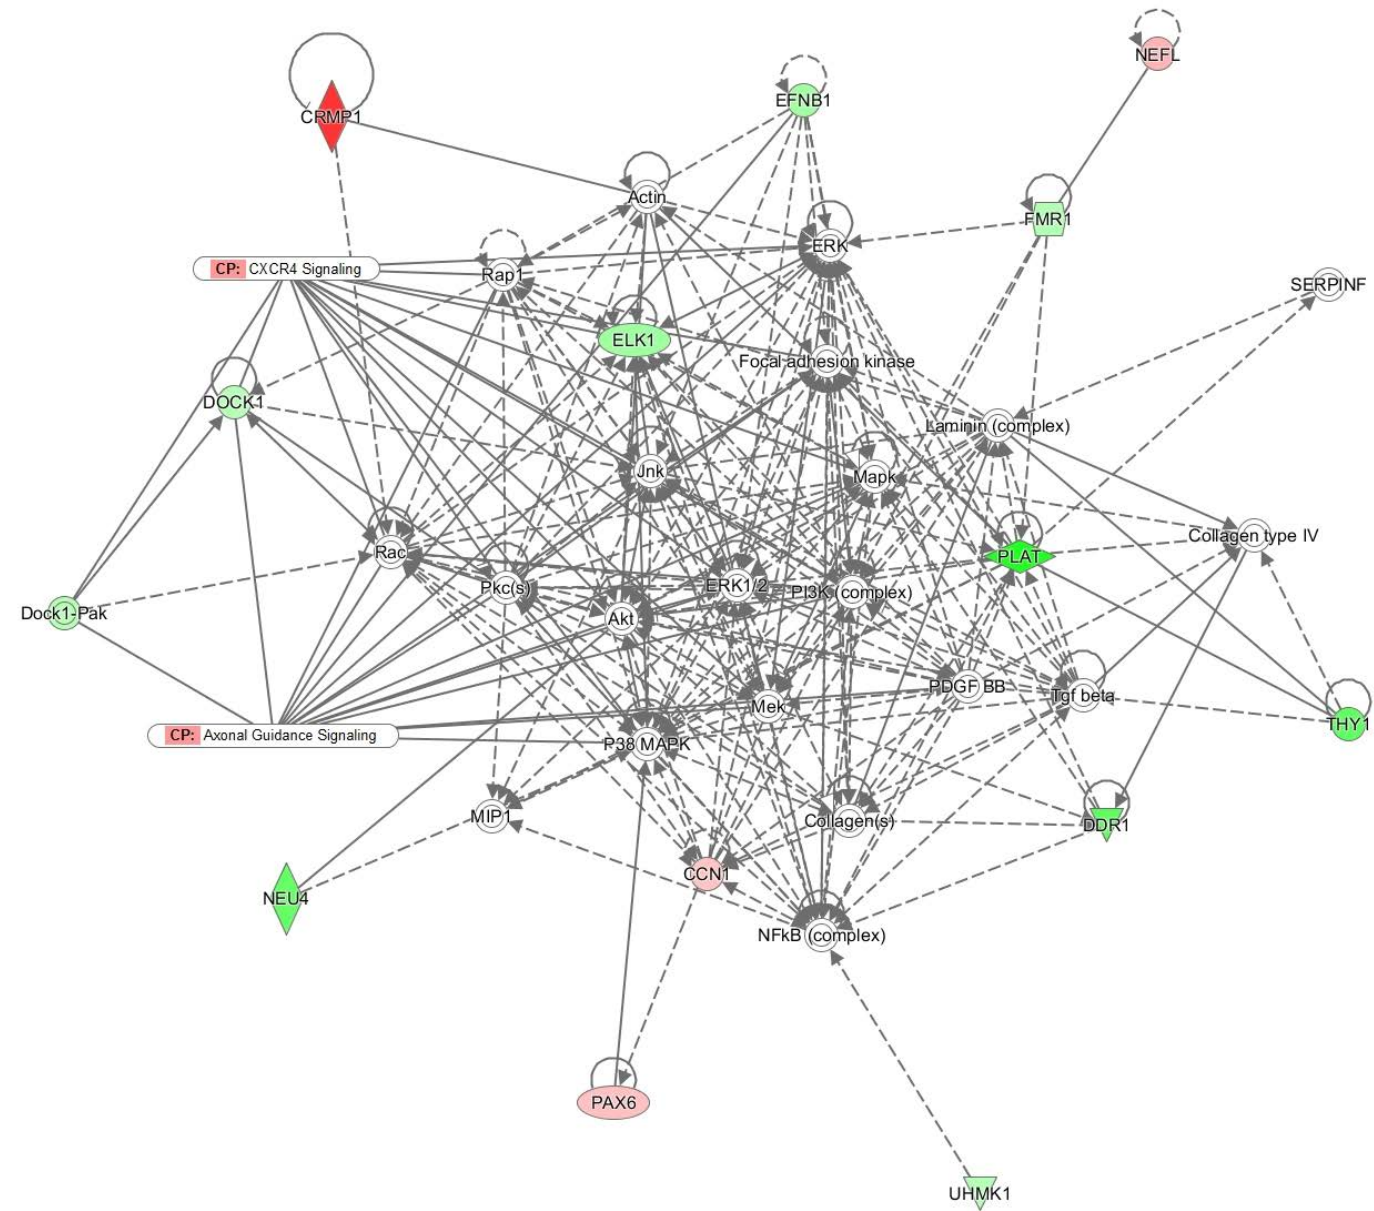

Fig. S3

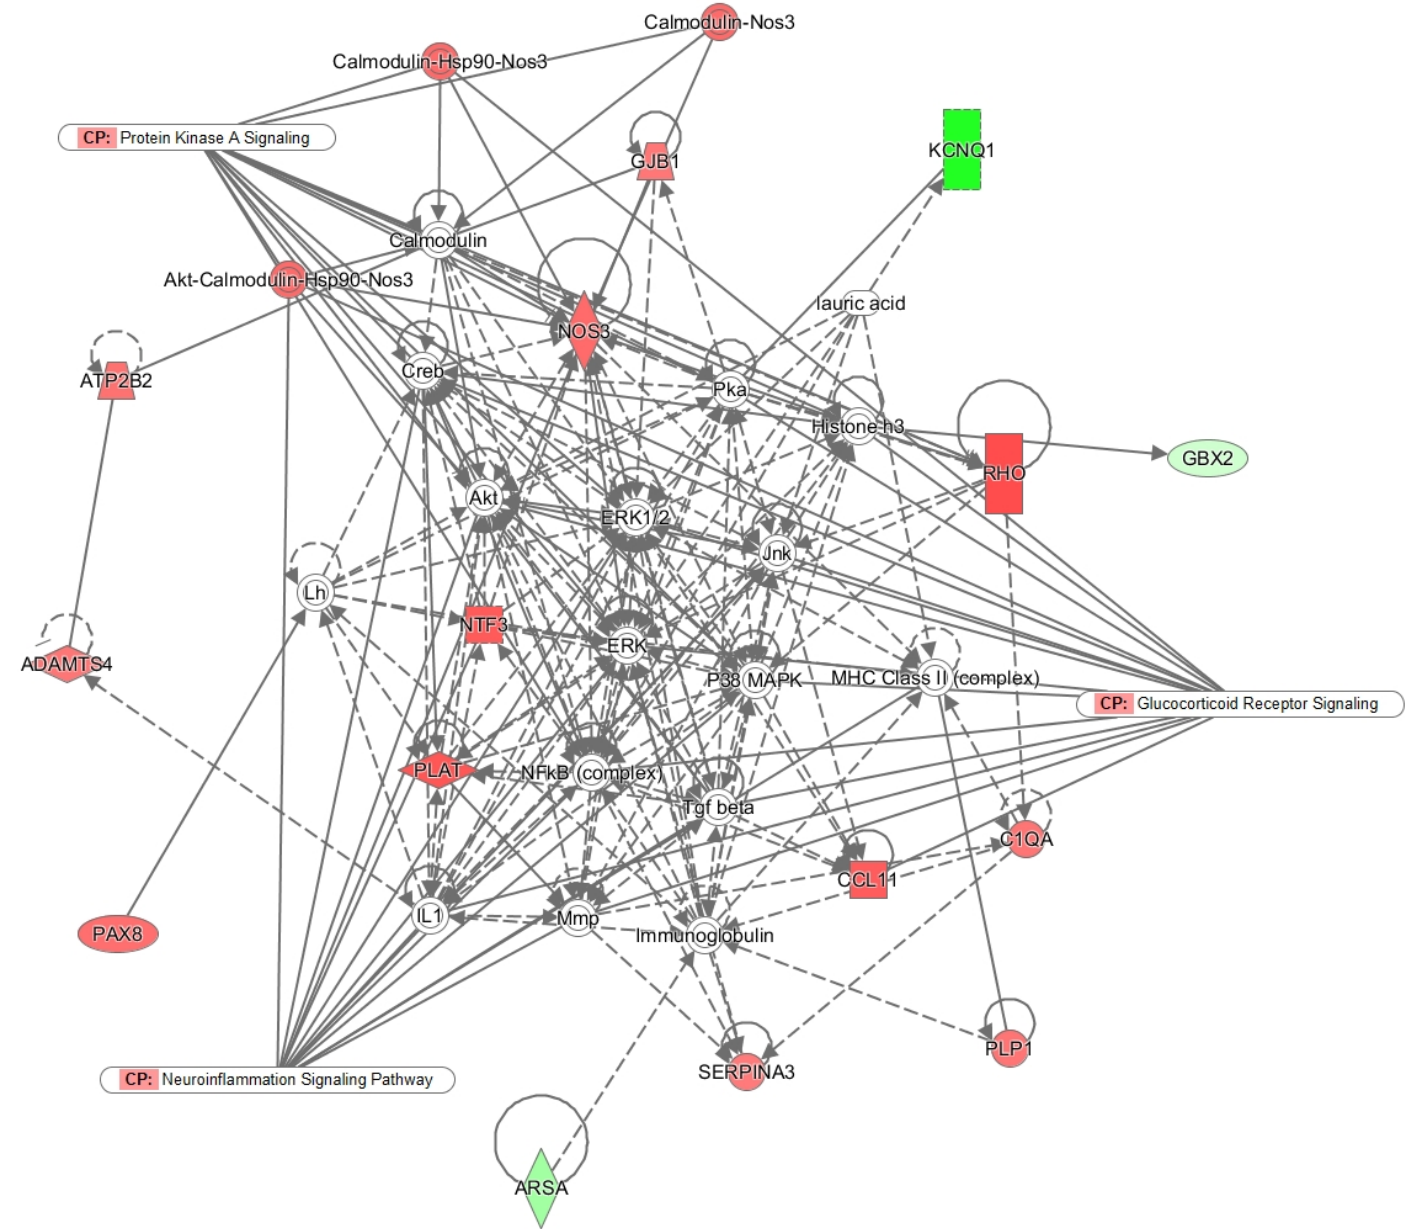

Fig. S4

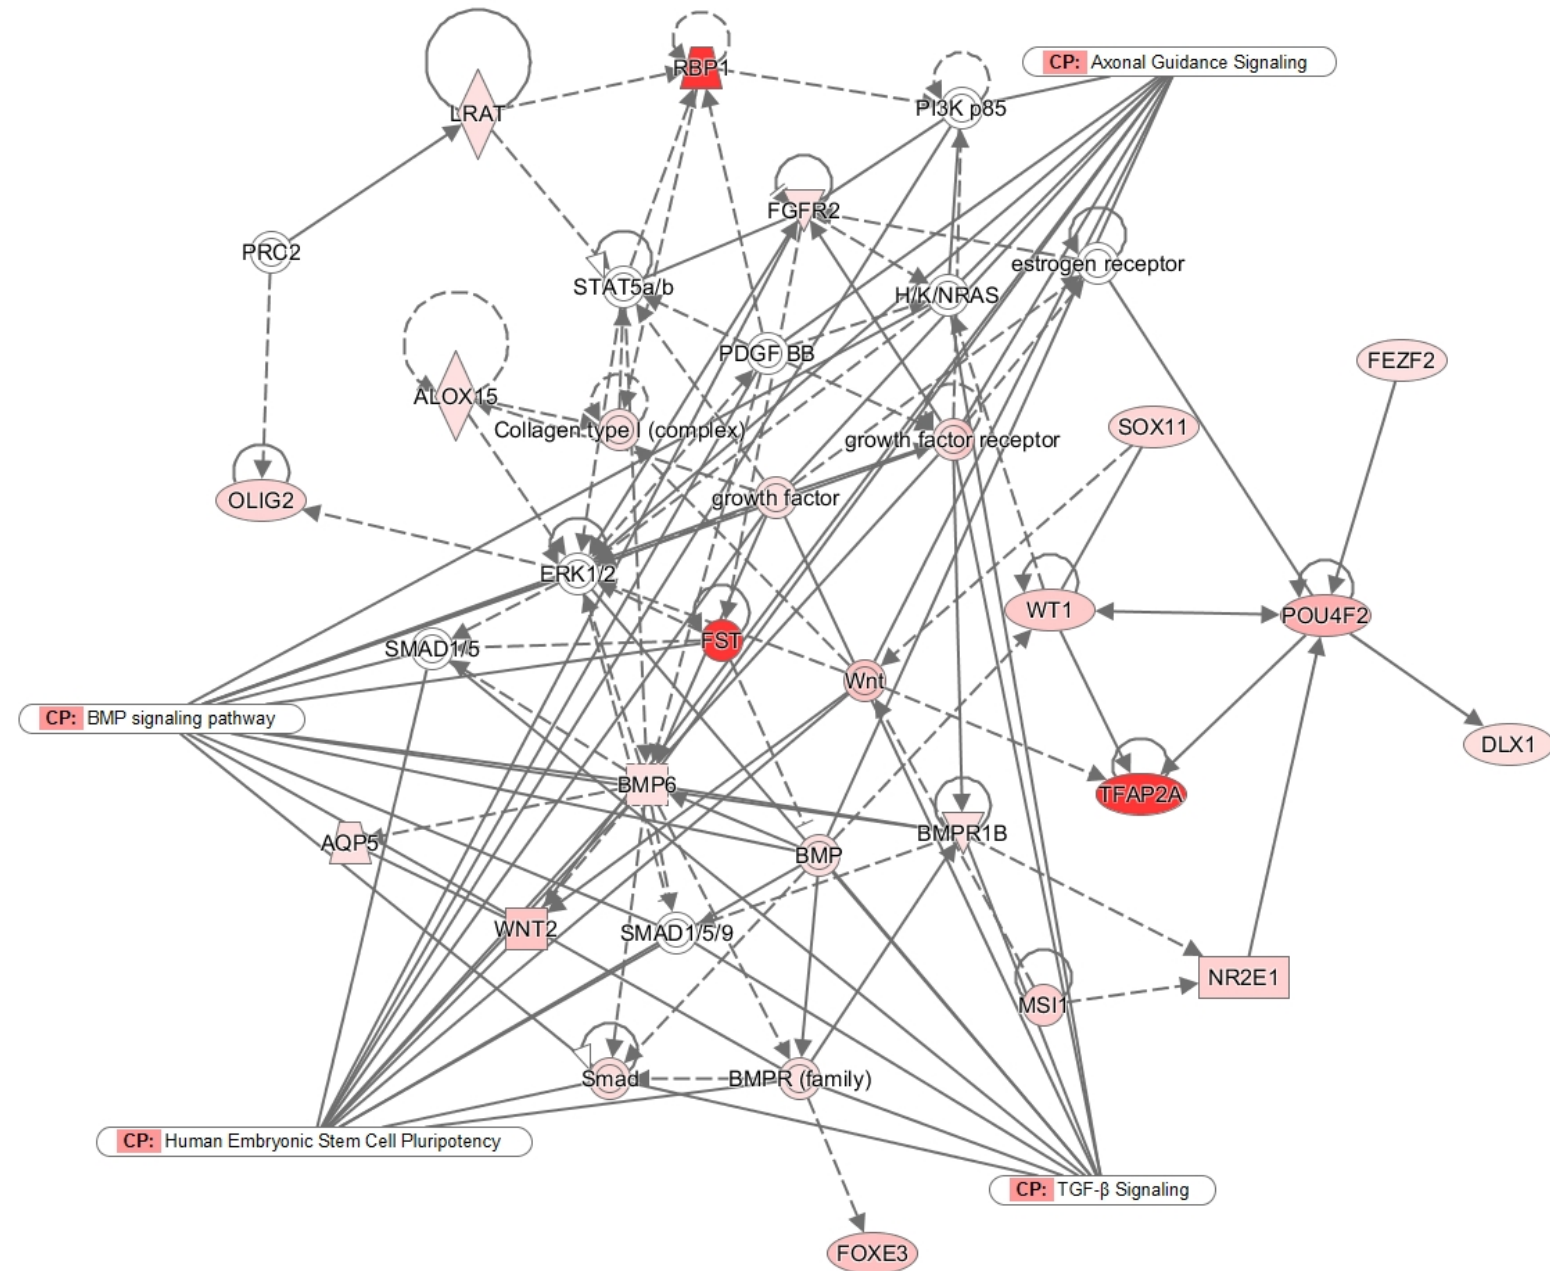

Fig. S5

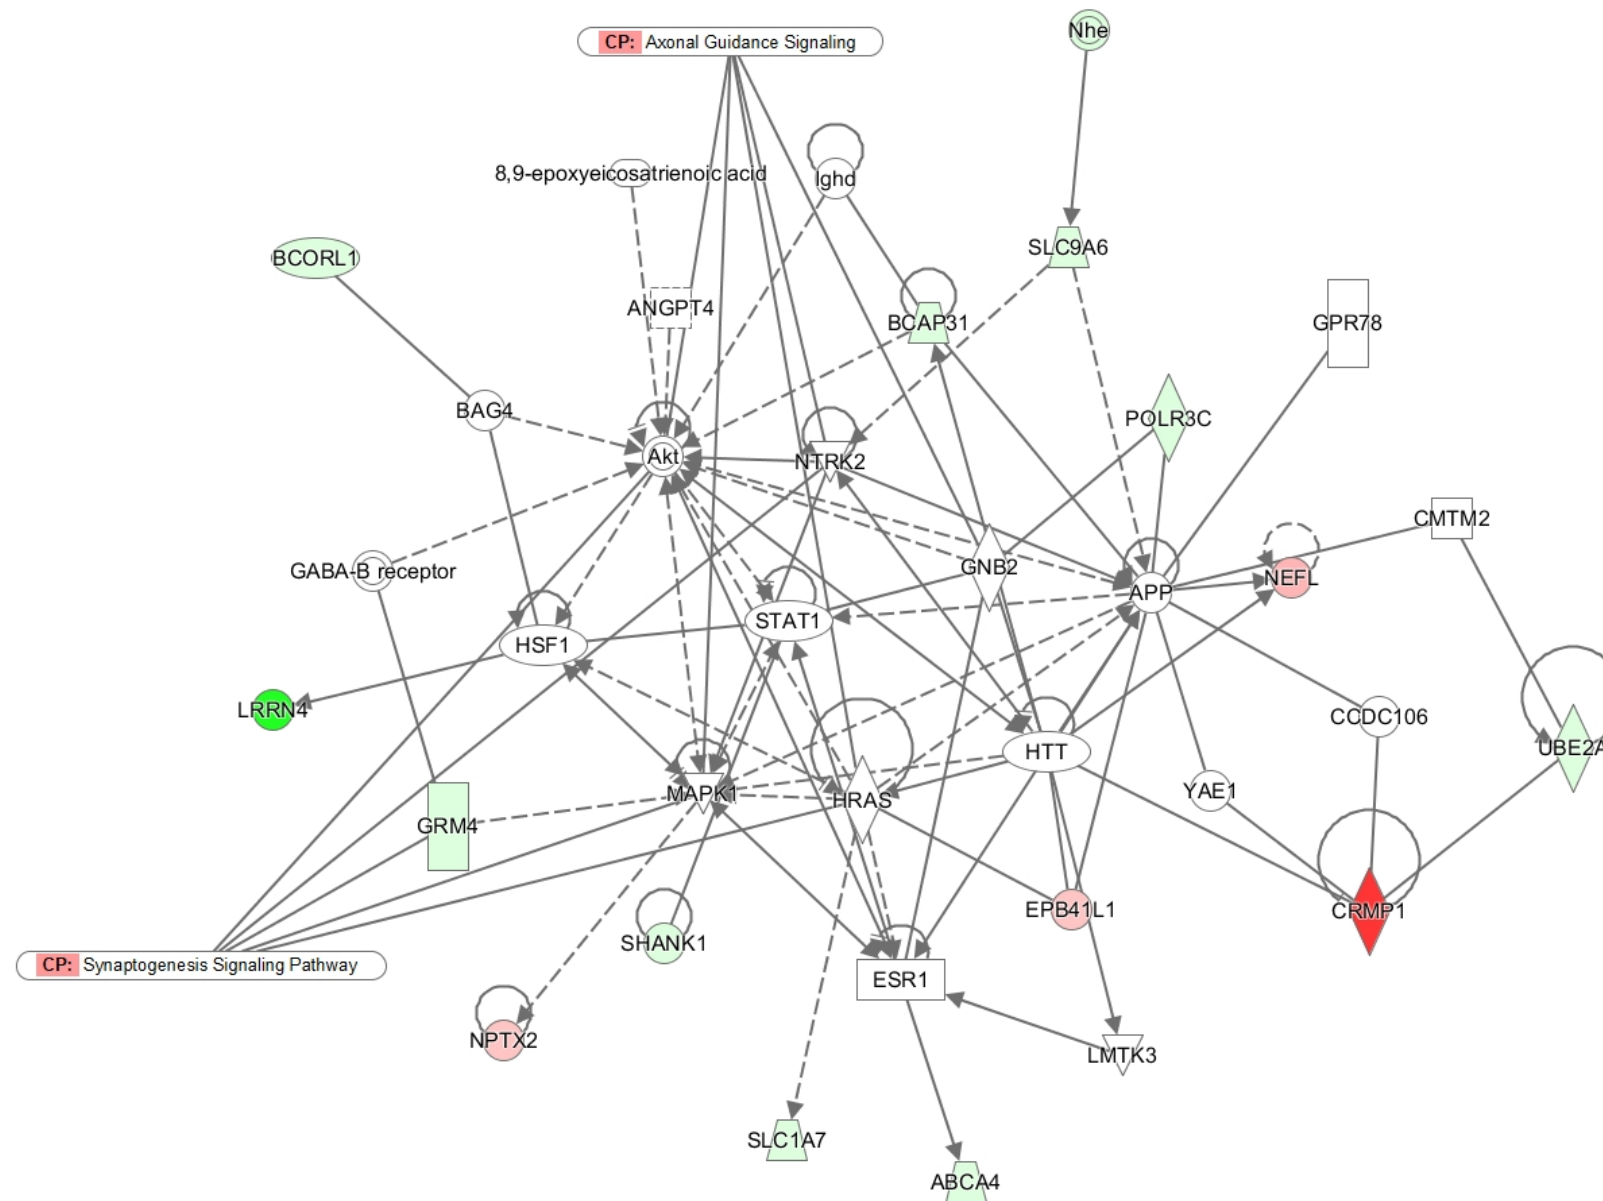



Fig. S6

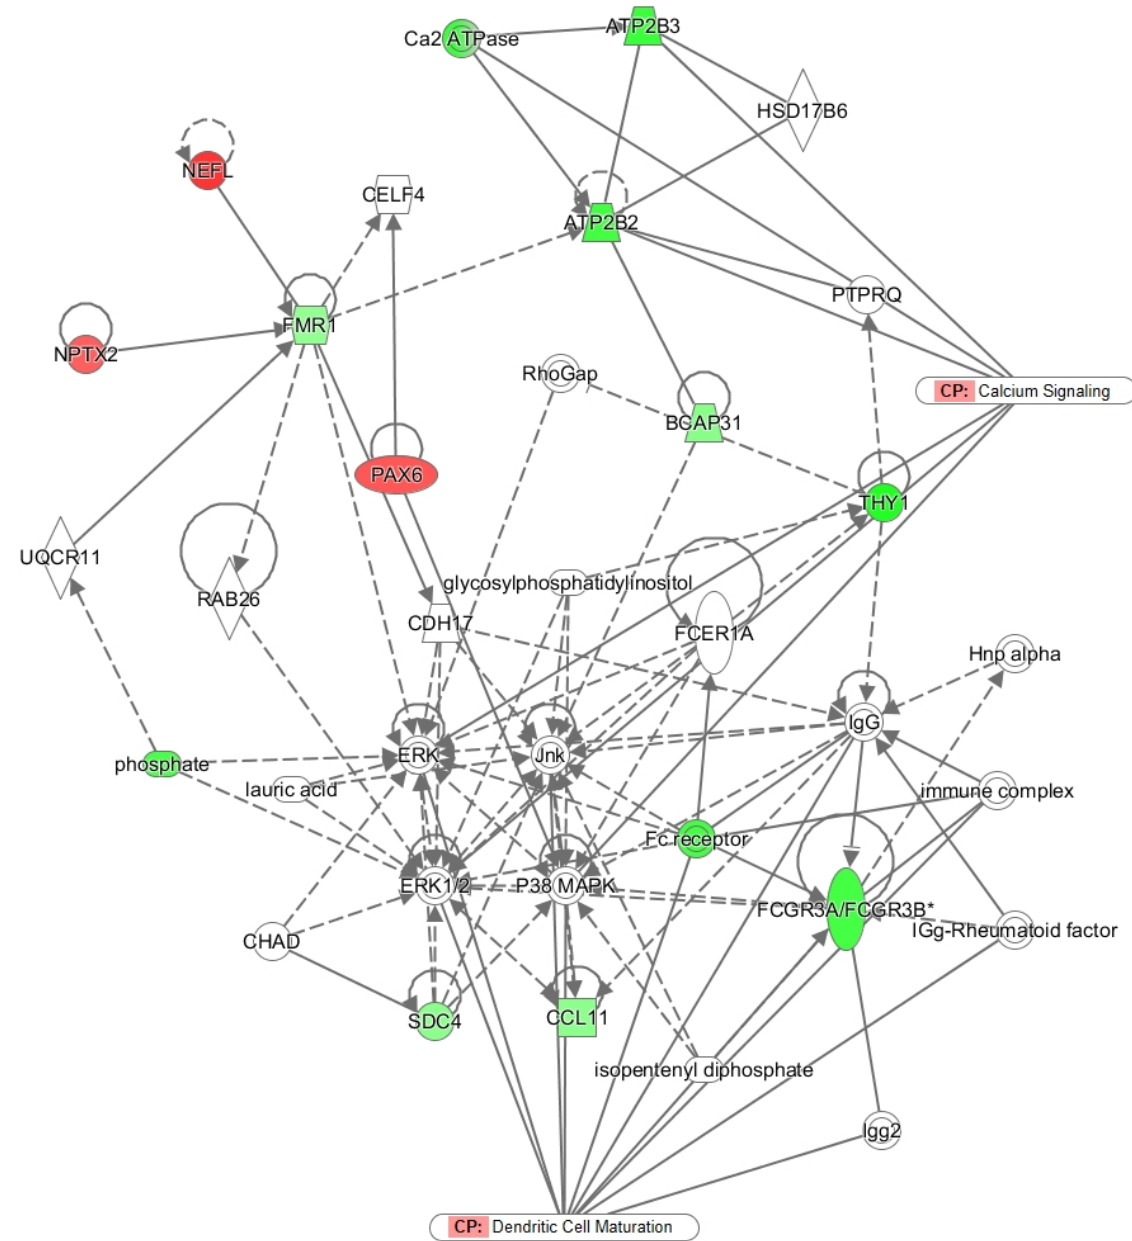

Fig. S7

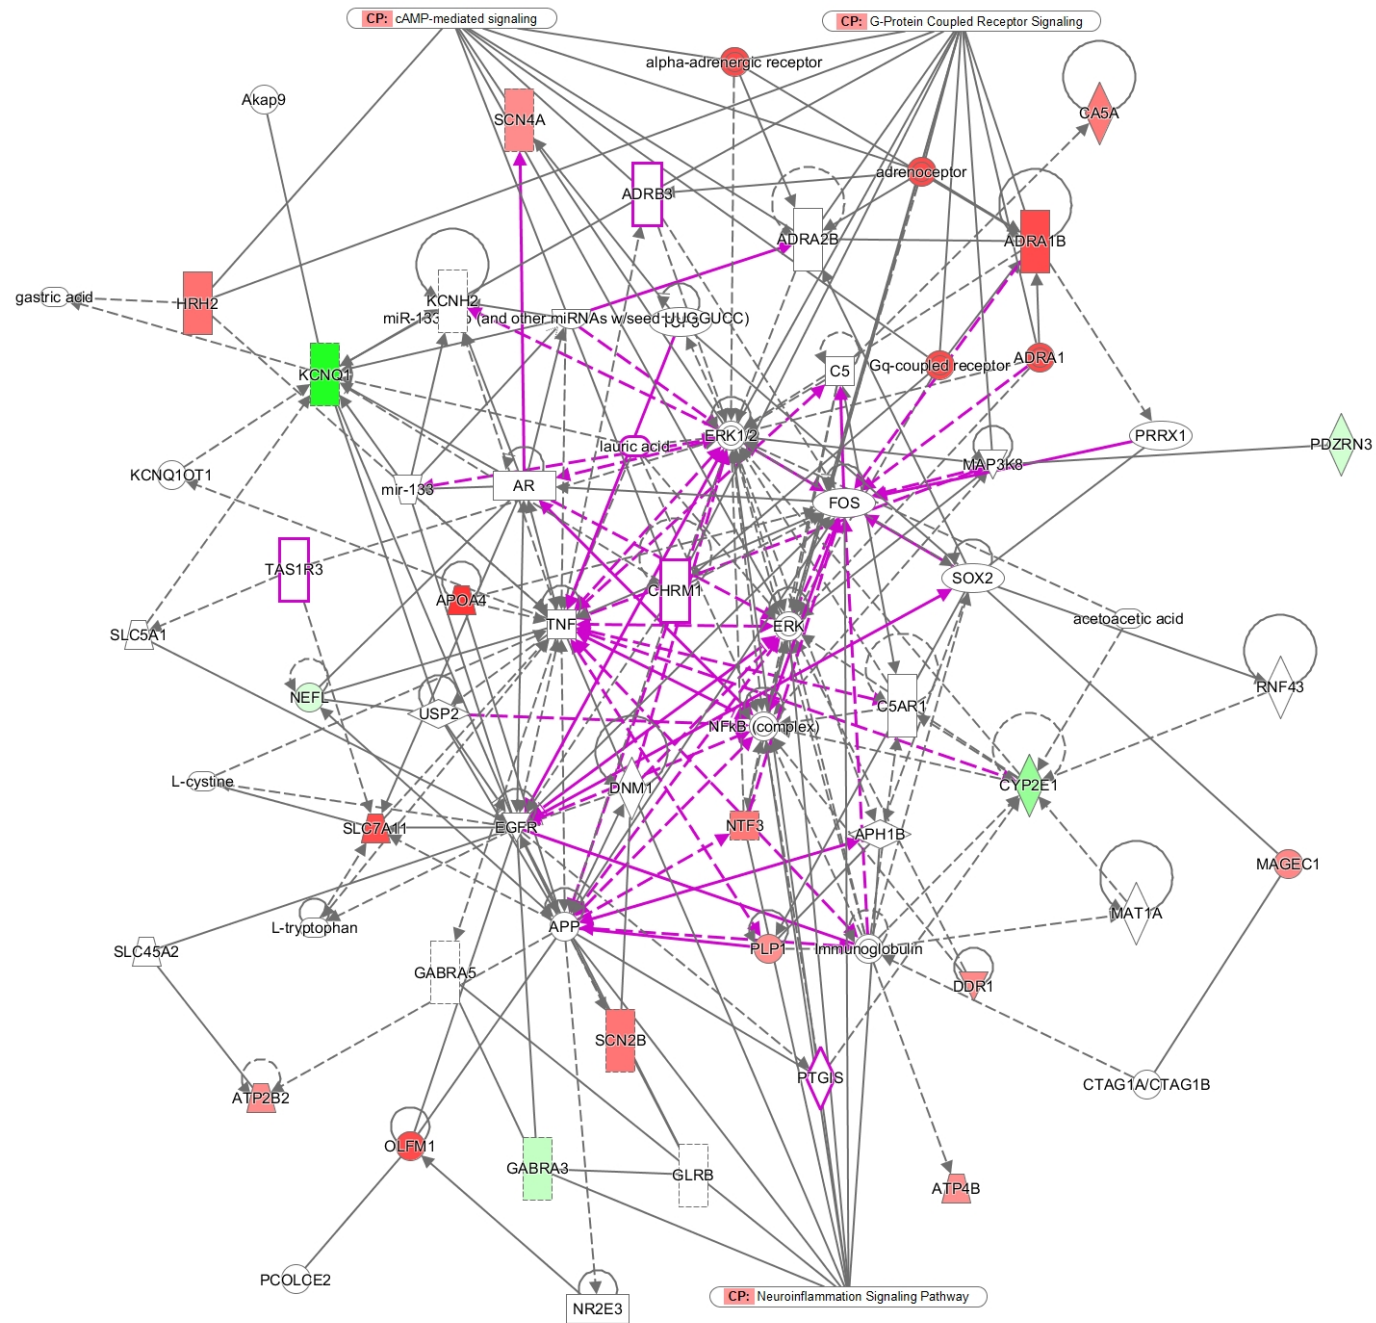



Fig. S8

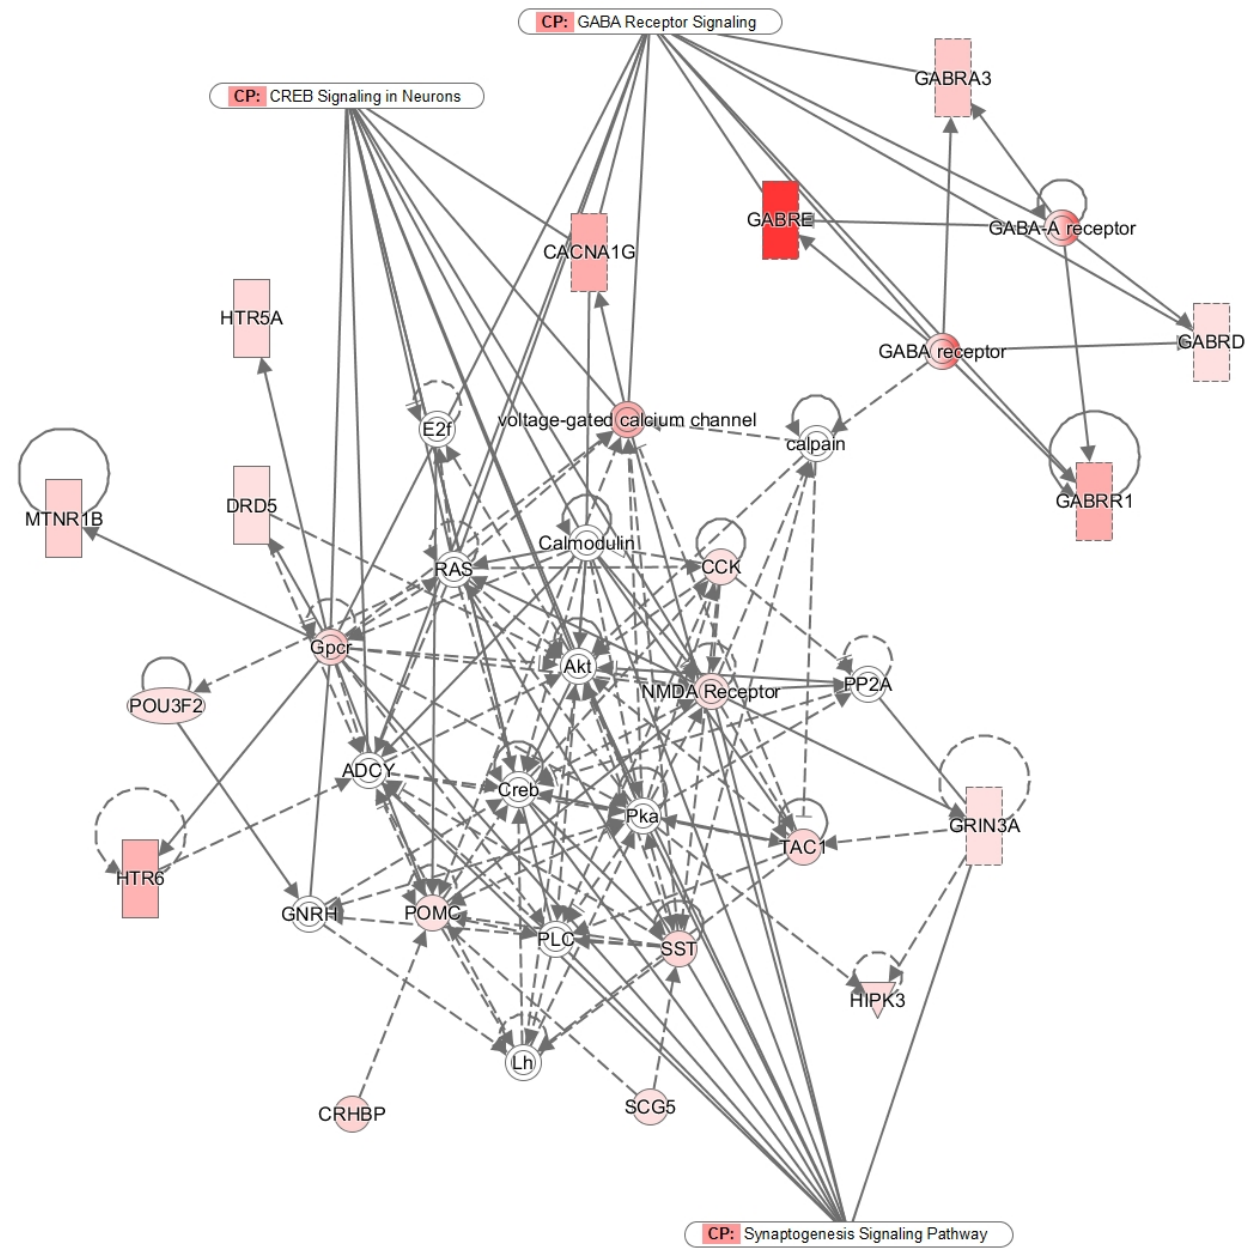

Fig. S9

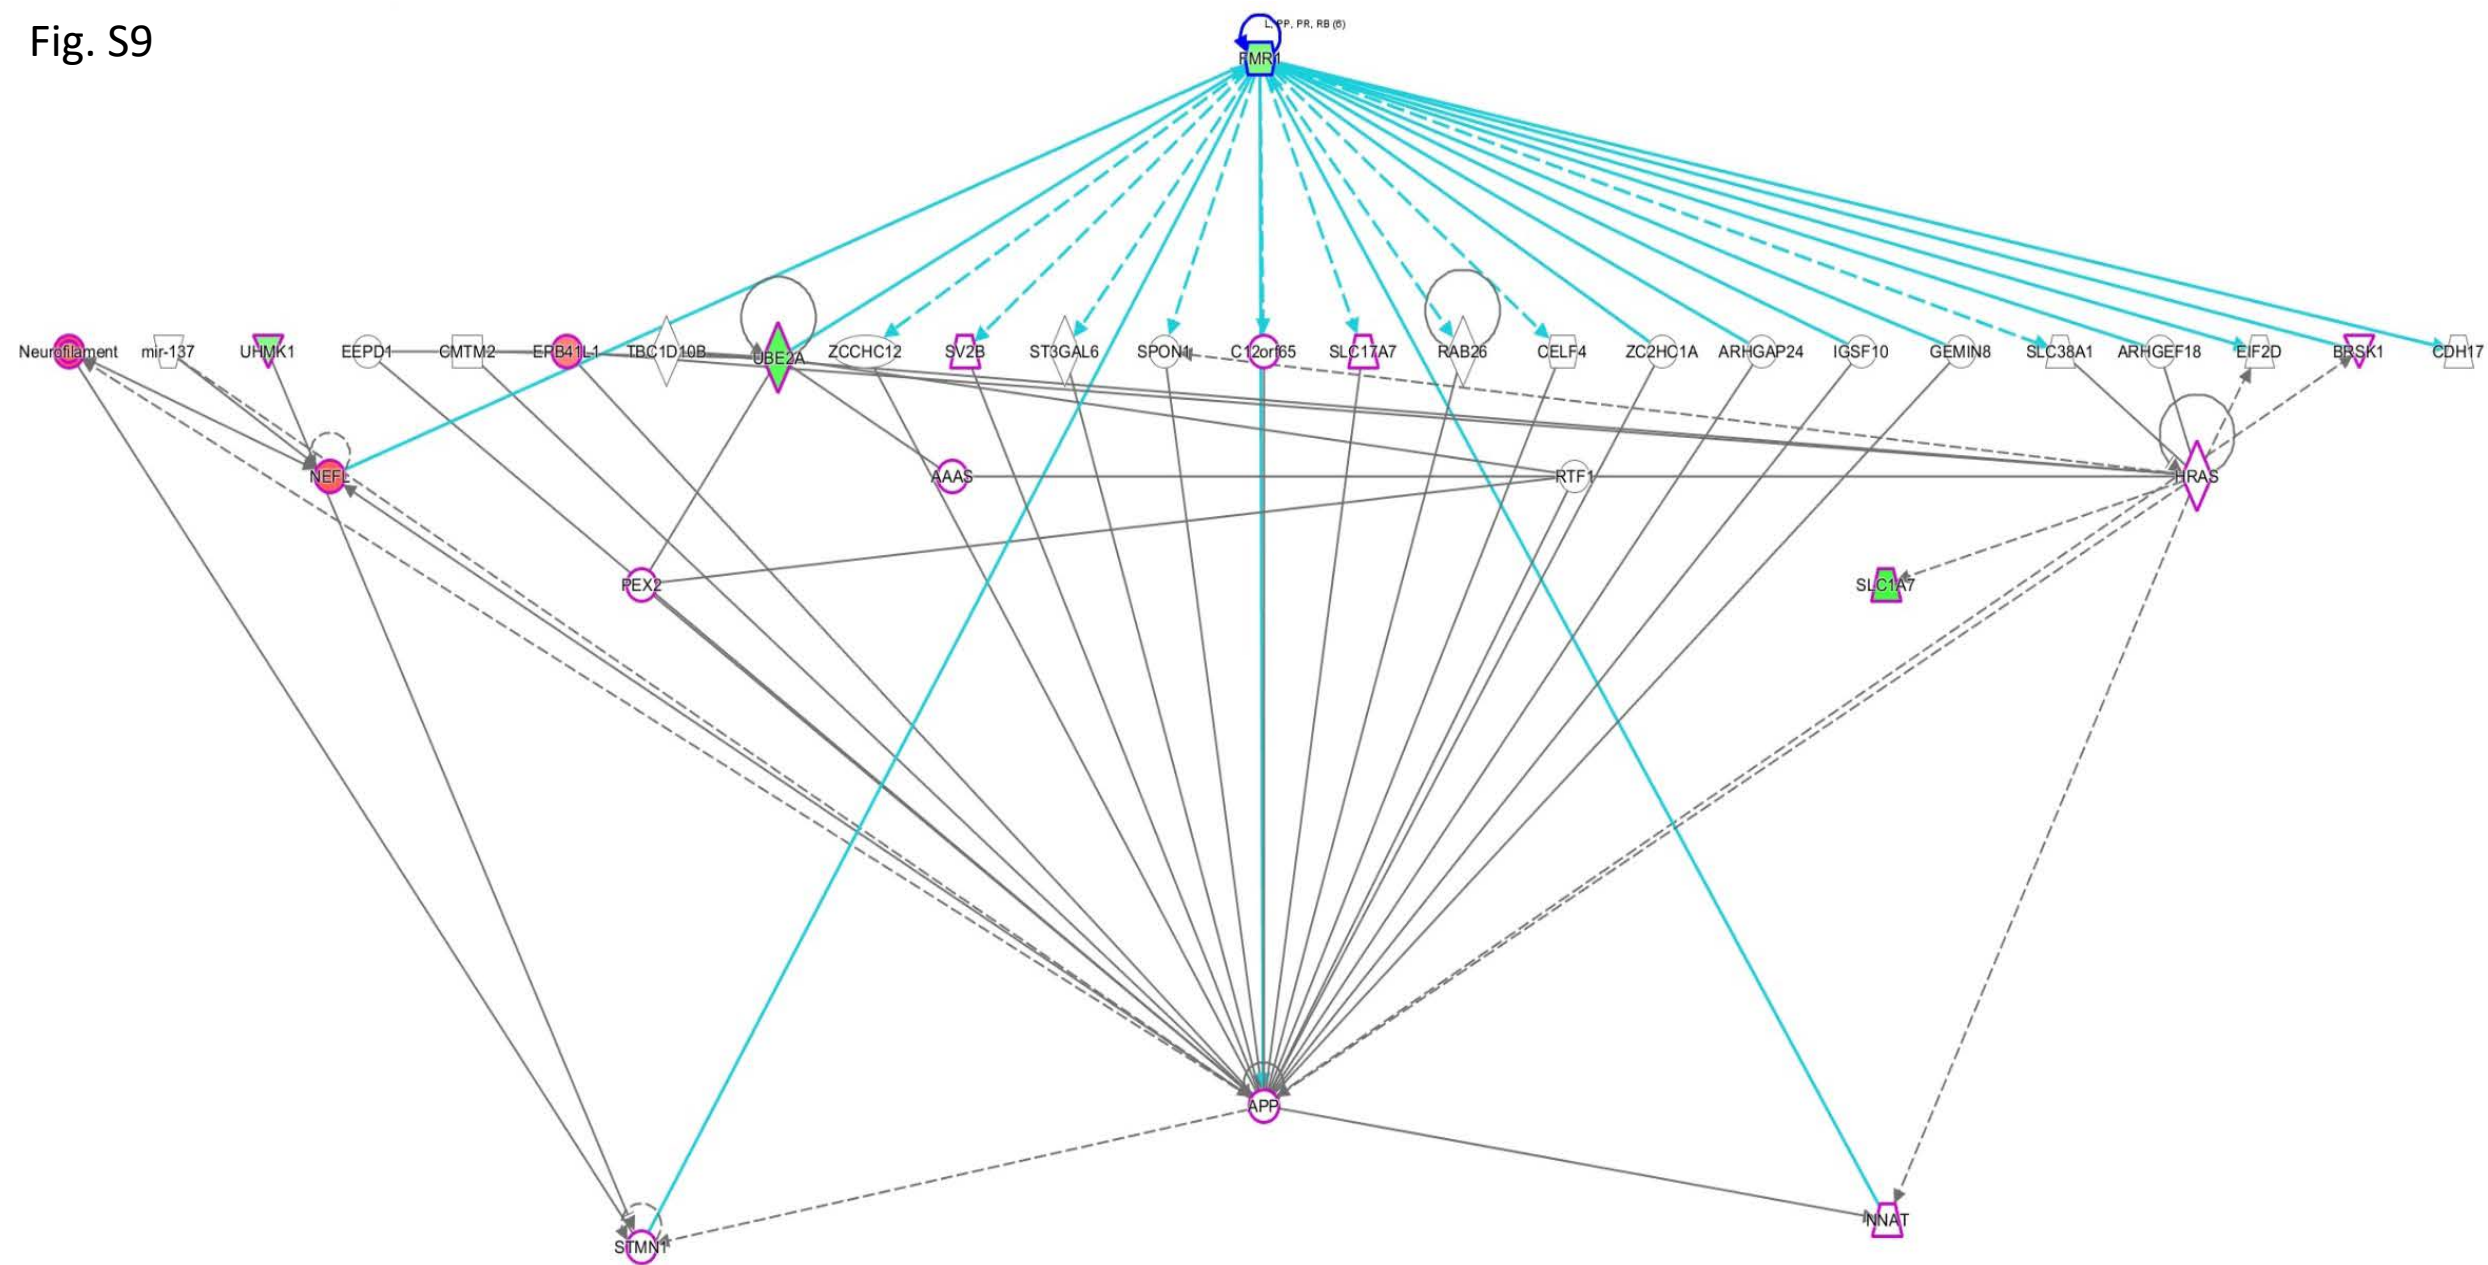

Supplement: s1 [file s1]
