# Supplementary material for: Phenotypic Subtyping and Re-Analysis of Existing Methylation Data from Autistic Probands in Simplex Families Reveal ASD Subtype-Associated Differentially Methylated Genes and Biological Functions
Source: MDPI journal article supplement (doi:10.3390/ijms21186877), 2020-09-19
Supplement: s1 [file s1]

|                                                                       | Mild                         |                              | Intermediate                     |                               | Severely Language-Impaired      |                                  | Combined                     |                               |
|-----------------------------------------------------------------------|------------------------------|------------------------------|----------------------------------|-------------------------------|---------------------------------|----------------------------------|------------------------------|-------------------------------|
|                                                                       | Probands                     | Siblings                     | Probands                         | Siblings                      | Probands                        | Siblings                         | Probands                     | Siblings                      |
| Male gender, <i>N</i>                                                 | 149                          | 149                          | 121                              | 121                           | 22                              | 22                               | 292                          | 292                           |
| Age at time of ADI-R:<br>mean $\pm$ SD (range), years*                | 1.96 $\pm$ 1.24<br>(0.17–7)  | —                            | 1.76 $\pm$ 1.22<br>(0.08–9)      | —                             | 1.49 $\pm$ 0.65<br>(0.75–3)     | —                                | 1.84 $\pm$ 1.20<br>(0.08–9)  | —                             |
| Age at time of sampling:<br>mean $\pm$ SD (range), years <sup>a</sup> | 9.10 $\pm$ 3.38<br>(4–17.75) | 9.41 $\pm$ 3.93<br>(3–20.83) | 10.57 $\pm$ 3.36<br>(4.08–17.67) | 11.59 $\pm$ 4.74<br>(4–24.58) | 8.25 $\pm$ 3.71<br>(4.25–16.17) | 10.37 $\pm$ 4.30<br>(4.08–19.33) | 9.65 $\pm$ 3.48<br>(4–17.75) | 10.38 $\pm$ 4.42<br>(3–24.58) |
| Race/ethnicity (% <i>N</i> )                                          |                              |                              |                                  |                               |                                 |                                  |                              |                               |
| White                                                                 | 106 (71.14%)                 | 106 (71.14%)                 | 86 (71.07%)                      | 86 (71.07%)                   | 14 (63.64%)                     | 14 (63.64%)                      | 206 (70.55%)                 | 206 (70.55%)                  |
| Black or African American                                             | 2 (1.34%)                    | 2 (1.34%)                    | 3 (2.48%)                        | 3 (2.48%)                     | 0 (0%)                          | 0 (0%)                           | 5 (1.71%)                    | 5 (1.71%)                     |
| Asian                                                                 | 4 (2.68%)                    | 4 (2.68%)                    | 2 (1.65%)                        | 2 (1.65%)                     | 2 (9.09%)                       | 2 (9.09%)                        | 8 (2.74%)                    | 8 (2.74%)                     |
| Hawaiian or Pacific Islander                                          | 0 (0%)                       | 0 (0%)                       | 1 (0.83%)                        | 1 (0.83%)                     | 0 (0%)                          | 0 (0%)                           | 1 (0.34%)                    | 1 (0.34%)                     |
| More than one race                                                    | 8 (5.37%)                    | 8 (5.37%)                    | 8 (6.61%)                        | 8 (6.61%)                     | 2 (9.09%)                       | 2 (9.09%)                        | 18 (6.16%)                   | 18 (6.16%)                    |
| Unknown or not specified                                              | 29 (19.46%)                  | 29 (19.46%)                  | 21 (17.36%)                      | 21 (17.36%)                   | 4 (18.18%)                      | 4 (18.18%)                       | 54 (18.49%)                  | 54 (18.49%)                   |

SD standard deviation

\* Age of proband at the time of administration and scoring of the Autism Diagnostic Interview-Revised (ADI-R). Ages unknown for 2/149 probands in the mild subgroup and 2/121 probands in the intermediate subgroup.

<sup>a</sup> Age of individual at the time blood samples were collected for the Simons Simplex Collection (SSC) repository.
