# Supplementary material for: Phenotypic Subtyping and Re-Analysis of Existing Methylation Data from Autistic Probands in Simplex Families Reveal ASD Subtype-Associated Differentially Methylated Genes and Biological Functions
Source: Int J Mol Sci. 2020 Sep 19;21(18):6877. doi: 10.3390/ijms21186877 (PMC7555936; doi:10.3390/ijms21186877)
Supplement: Supplementary file 1 [file ijms-21-06877-s001.zip]

Archive with 12 entries (10 files):
- ijms-927106-supplementary/
- ijms-927106-supplementary/Suppl. Materials_revised MS/
- ijms-927106-supplementary/Suppl. Materials_revised MS/Supplementary Figures S1-S9.pdf
- ijms-927106-supplementary/Suppl. Materials_revised MS/Table S1. Significant DAGs in language subgroup.xlsx
- ijms-927106-supplementary/Suppl. Materials_revised MS/Table S2. Significant DAGs in intermediate subgroup.xlsx
- ijms-927106-supplementary/Suppl. Materials_revised MS/Table S3. Significant DAGs in mild subgroup.xlsx
- ijms-927106-supplementary/Suppl. Materials_revised MS/Table S4. Significant DAGs in combined case group.xlsx
- ijms-927106-supplementary/Suppl. Materials_revised MS/Table S5. Map of CpG sites in different subtypes.xlsx
- ijms-927106-supplementary/Suppl. Materials_revised MS/Table S6. Over-represented neurological and developmental disorders_all groups.xlsx
- ijms-927106-supplementary/Suppl. Materials_revised MS/Table S7. ADIR items and score adjustments used for cluster analyses.xlsx
- ijms-927106-supplementary/Suppl. Materials_revised MS/Table S8. Demographic information for individuals in study_EDIT.pdf
- ijms-927106-supplementary/Suppl. Materials_revised MS/Table S9. Over-represented neurological functions_all groups.xlsx
