# Supplementary material for: Phenotypic Subtyping and Re-Analysis of Existing Methylation Data from Autistic Probands in Simplex Families Reveal ASD Subtype-Associated Differentially Methylated Genes and Biological Functions
Source: Int J Mol Sci. 2020 Sep 19;21(18):6877. doi: 10.3390/ijms21186877 (PMC7555936; doi:10.3390/ijms21186877)
Supplement: Supplementary file 1 [file ijms-21-06877-s001.zip › ijms-927106-supplementary/Suppl. Materials_revised MS/Table S1. Significant DAGs in language subgroup.xlsx]

## Sheet: Sheet1
		Patients								Siblings
Index	TargetID	P. AVG_Beta	P. DiffScore	|P. DiffScore|	p-value	P. Delta Beta	P. Intensity	P. N-ARRAYS	P. ARRAY_ STDEV	S. AVG_Beta	S. DiffScore	S. Delta Beta	S. Intensity	S. N-ARRAYS	S. ARRAY_ STDEV	SYMBOL	GENE_ID	SYNONYM	ACCESSION
23580	cg23629496	0.569374	-138.106	138.106	1.54664e-14	-0.125758	9126.21	22	0.248565	0.695132	0	1	8984.56	22	0.132595	C20orf75	GeneID:164312	NLRR4; FLJ23994; MGC25027; dJ1056H1.1;	NM_152611.2
14129	cg14159672	0.243979	-136.35	136.35	2.31729e-14	-0.121729	6478.06	22	0.171252	0.365708	0	1	5955.21	22	0.236557	FLJ32569	GeneID:148811		NM_152491.3
16543	cg16474696	0.218852	-126.812	126.812	2.08339e-13	-0.11362	8523.28	22	0.192063	0.332471	0	1	8159.75	22	0.20677	MGC3207	GeneID:84245		NM_032285.1
27060	cg27105123	0.464725	-124.879	124.879	3.252e-13	-0.126533	5099.95	22	0.181049	0.591257	0	1	4901.37	22	0.0882605	EPS8L1	GeneID:54869	DRC3; EPS8R1; MGC4642; PP10566; FLJ20258; MGC23164;	NM_017729.2
14897	cg14893161	0.367515	-106.569	106.569	2.20338e-11	-0.118552	10747.9	22	0.195588	0.486066	0	1	11116.7	22	0.225538	FLJ32569	GeneID:148811		NM_152491.3
21879	cg21909391	0.691945	-88.8467	88.8467	1.30416e-09	-0.0895912	4387.39	22	0.234666	0.781536	0	1	4502.68	22	0.118667	FLJ42393	GeneID:401105		NM_207488.1
762	cg00729708	0.592887	-75.2378	75.2378	2.99375e-08	-0.0963083	9717.9	22	0.209948	0.689195	0	1	11393.5	22	0.167084	LASS3	GeneID:204219	MGC27091;	NM_178842.2
21722	cg21717724	0.621949	68.6493	68.6493	1.36479e-07	0.0981155	3767.42	22	0.162744	0.523833	0	1	3964.99	22	0.18499	PSMD5	GeneID:5711	S5B; KIAA0072; MGC23145;	NM_005047.2
3720	cg03704393	0.793027	-60.7916	60.7916	8.33366e-07	-0.0625409	8172.17	22	0.236218	0.855568	0	1	9068.88	22	0.162987	ZNF169	GeneID:169841	MGC51961;	NM_194320.1
26484	cg26521448	0.899532	-54.482	54.482	3.5629e-06	-0.0395686	20822.3	22	0.183561	0.939101	0	1	20805.6	22	0.0214462	ZC3H7A	GeneID:29066	ZC3H7; HSPC055; ZC3HDC7; FLJ10027; FLJ20318;	NM_014153.2
20005	cg20022541	0.722206	53.4714	53.4714	4.49631e-06	0.0807235	7124.65	22	0.197231	0.641483	0	1	7384.1	22	0.233172	C14orf152	GeneID:90050		NM_138344.2
3562	cg03544320	0.158821	49.5997	49.5997	1.09656e-05	0.0577152	18092.7	22	0.102891	0.101106	0	1	16793.7	22	0.0757001	CRMP1	GeneID:1400	DRP1; DRP-1; DPYSL1;	NM_001313.3
19581	cg19584957	0.942276	-48.0486	48.0486	1.56727e-05	-0.0286574	25534.5	22	0.134559	0.970934	0	1	24898	22	0.00771423	TTLL10	GeneID:254173	TTLL5; FLJ36119; FLJ42131; RP5-902P8.1;	NM_153254.1
16939	cg16899306	0.789238	43.7195	43.7195	4.24672e-05	0.0661785	4447.31	22	0.124435	0.72306	0	1	4278.27	22	0.163053	HLA-DQB2	GeneID:3120	HLA-DXB;	NM_182549.1
12149	cg12215675	0.866559	-42.9987	42.9987	5.01338e-05	-0.042853	13847.4	22	0.166007	0.909412	0	1	15971.3	22	0.0246698	TTLL2	GeneID:83887	C6orf104; NYD-TSPG; dJ366N23.3;	NM_031949.3
17994	cg17977362	0.749861	-42.9987	42.9987	5.01338e-05	-0.0620188	21374.5	22	0.264405	0.811879	0	1	22622.8	22	0.238446	FLJ45964	GeneID:401040		NM_207483.1
22006	cg22038738	0.86885	-41.5247	41.5247	7.03923e-05	-0.0419327	23985.7	22	0.144798	0.910783	0	1	23450.7	22	0.0399499	PLAT	GeneID:5327	TPA; T-PA; DKFZp686I03148;	NM_000930.2
5598	cg05594230	0.116307	-37.8867	37.8867	0.00016268	-0.0546304	6983.19	22	0.182078	0.170937	0	1	7150.18	22	0.237498	INGX	GeneID:27160	ING2; ING1-like; MGC119770; MGC119771;	NR_002226.1
5241	cg05221167	0.116511	37.0564	37.0564	0.000196951	0.0456271	12856	22	0.154505	0.0708837	0	1	13394.9	22	0.0192055	ZNF560	GeneID:147741	FLJ31986; MGC119490; MGC119493;	NM_152476.1
18070	cg18059933	0.171323	-36.7419	36.7419	0.000211744	-0.0624271	8803.27	22	0.0911	0.23375	0	1	8004.36	22	0.106921	TP53INP1	GeneID:94241	SIP; Teap; FLJ22139; p53DINP1; TP53DINP1; TP53INP1A; TP53INP1B; DKFZp434M1317;	NM_033285.2
12214	cg12286890	0.758068	-35.1691	35.1691	0.000304154	-0.0569841	5680.03	22	0.175196	0.815052	0	1	6036.46	22	0.0401841	XCL2	GeneID:6846	SCM1B; SCYC2; SCM-1b;	NM_003175.2
13212	cg13286902	0.0614574	-35.1691	35.1691	0.000304154	-0.0427086	13011.7	22	0.0382887	0.104166	0	1	13402.4	22	0.109542	CXorf34	GeneID:79979	FLJ12687; dJ341D10.3;	NM_024917.4
12489	cg12564453	0.702563	-33.0799	33.0799	0.000492051	-0.0625875	19352.4	22	0.129519	0.76515	0	1	19512.7	22	0.0988618	CETP	GeneID:1071		NM_000078.1
5943	cg05949660	0.755719	-31.6872	31.6872	0.000678083	-0.0554637	13569.7	22	0.152062	0.811183	0	1	13692.4	22	0.0356147	MICAL1	GeneID:64780	MICAL; NICAL; MICAL-1; FLJ11937; FLJ21739; DKFZp434B1517;	NM_022765.2
2877	cg02876062	0.884084	-29.6195	29.6195	0.00109158	-0.0351914	11623	22	0.154124	0.919275	0	1	12039.8	22	0.0201166	FAM107B	GeneID:83641	C10orf45; FLJ45505; MGC11034; MGC90261;	NM_031453.2
3285	cg03270204	0.808345	-29.6195	29.6195	0.00109158	-0.0472073	8477.08	22	0.172498	0.855552	0	1	8896.71	22	0.0343632	DDR1	GeneID:780	CAK; DDR; NEP; PTK3; RTK6; TRKE; CD167; EDDR1; MCK10; NTRK4; PTK3A;	NM_001954.3
13851	cg13897627	0.773133	-29.5395	29.5395	0.00111185	-0.051977	11699.4	22	0.150286	0.82511	0	1	12319.7	22	0.0278423	FLJ44674	GeneID:400535		NM_207449.1
21629	cg21633698	0.86253	-29.1372	29.1372	0.00121977	-0.038547	11711.3	22	0.166981	0.901077	0	1	11602.7	22	0.0228933	THY1	GeneID:7070	CD90;	NM_006288.2
711	cg00684178	0.773904	-28.4456	28.4456	0.00143034	-0.0512365	8839.43	22	0.197393	0.825141	0	1	9528.64	22	0.118385	NEU4	GeneID:129807	MGC18222; MGC102757;	NM_080741.1
12557	cg12619162	0.855252	-27.7659	27.7659	0.00167268	-0.0391243	10611	22	0.174443	0.894377	0	1	10583	22	0.0259871	FXYD4	GeneID:53828	CHIF;	NM_173160.2
14660	cg14659547	0.799566	-27.7659	27.7659	0.00167268	-0.0473518	9635.35	22	0.147149	0.846918	0	1	9674.47	22	0.036165	RETNLB	GeneID:84666	XCP2; FIZZ1; FIZZ2; HXCP2; RELMb; RELMbeta; RELM-beta;	NM_032579.1
18783	cg18780401	0.03887	-27.1061	27.1061	0.00194709	-0.0344163	16687.3	22	0.0180739	0.0732863	0	1	17710.7	22	0.107019	OTUD5	GeneID:55593	MGC104871; DKFZp761A052;	NM_017602.2
16743	cg16698623	0.836971	-26.466	26.466	0.00225631	-0.0413242	16757.2	22	0.154741	0.878295	0	1	16716.2	22	0.0381183	MGMT	GeneID:4255		NT_008818.15
10291	cg10365880	0.878782	-26.3634	26.3634	0.00231026	-0.0347039	14450.2	22	0.144089	0.913486	0	1	14250.4	22	0.023887	PKD2L1	GeneID:9033	PCL; PKDL; PKD2L;	NM_016112.2
5215	cg05187322	0.824073	-26.3415	26.3415	0.00232191	-0.0430692	10066.9	22	0.141264	0.867142	0	1	10083.8	22	0.107079	CARD14	GeneID:79092	BIMP2; CARMA2;	NM_024110.2
22521	cg22552966	0.932226	-26.0724	26.0724	0.00247036	-0.0253718	21467.8	22	0.131503	0.957597	0	1	21696.9	22	0.0154249	FLJ31196	GeneID:146802	MATE2;	NM_152908.2
8772	cg08815403	0.792079	-25.4393	25.4393	0.00285804	-0.0469577	6384.01	22	0.158025	0.839036	0	1	6669.93	22	0.021588	HSD17B13	GeneID:345275	SCDR9; NIIL497; HMFN0376;	NM_178135.2
26705	cg26750319	0.932274	-25.4393	25.4393	0.00285804	-0.0251311	15023	22	0.133886	0.957405	0	1	14583.3	22	0.0150649	KCNQ1	GeneID:3784	LQT; RWS; WRS; LQT1; ATFB1; KCNA8; KCNA9; Kv1.9; Kv7.1; KVLQT1;	NT_009237.17
27336	cg27398547	0.2802	25.4393	25.4393	0.00285804	0.0598336	5093.89	22	0.155483	0.220366	0	1	5629.03	22	0.0917089	C14orf39	GeneID:317761		NM_174978.1
9085	cg09144786	0.0639967	-25.4026	25.4026	0.00288232	-0.038066	9725.19	22	0.0626103	0.102063	0	1	9656.55	22	0.115542	WDR44	GeneID:54521	RPH11; RAB11BP; MGC26781; DKFZp686L20145;	NM_019045.3
10161	cg10237469	0.107311	-25.4026	25.4026	0.00288232	-0.0451026	24942.6	22	0.0717561	0.152413	0	1	25991.8	22	0.0928361	CEACAM4	GeneID:1089	NCA; CGM7; CGM7_HUMAN;	NM_001817.2
17927	cg17901463	0.242548	25.4026	25.4026	0.00288232	0.0559449	5429.24	22	0.180097	0.186603	0	1	7303.86	22	0.165418	GSTM1	GeneID:2944	MU; H-B; GST1; GTH4; GTM1; MU-1; GSTM1-1; MGC26563; GSTM1a-1a; GSTM1b-1b;	NM_000561.2
22161	cg22189286	0.73923	-25.4026	25.4026	0.00288232	-0.0530037	6815.75	22	0.123005	0.792234	0	1	7032.4	22	0.0397075	HSPB8	GeneID:26353	H11; HMN2; DHMN2; E2IG1; HSP22;	NM_014365.2
23105	cg23137254	0.0268014	-25.4026	25.4026	0.00288232	-0.030806	14741.6	22	0.0104253	0.0576074	0	1	15333.4	22	0.153158	RNPC1	GeneID:55544	RBM38; SEB4B; SEB4D; HSRNASEB; dJ800J21.2;	NM_183425.1
24394	cg24443136	0.908586	-25.4026	25.4026	0.00288232	-0.0290801	12847	22	0.153244	0.937666	0	1	13086.3	22	0.0131228	ATP2B3	GeneID:492	PMCA3;	NM_021949.2
25545	cg25545210	0.796239	-25.4026	25.4026	0.00288232	-0.0461	6902.14	22	0.151074	0.842339	0	1	7084.41	22	0.0329321	KRTHA4	GeneID:3885	HA4; Ha-4; hHa4;	NM_021013.3
14150	cg14173969	0.231481	-25.1533	25.1533	0.00305257	-0.0601797	12152.6	22	0.0964807	0.291661	0	1	12474	22	0.057483	CD300C	GeneID:10871	LIR; CMRF35; IGSF16; CMRF35A; CMRF-35A; CMRF35A1;	NM_006678.2
14621	cg14615807	0.83169	-24.9881	24.9881	0.00317093	-0.0408697	12011	22	0.133841	0.87256	0	1	12519	22	0.0329991	BSND	GeneID:7809	BART; MGC119283; MGC119284; MGC119285;	NM_057176.2
14965	cg14959707	0.846329	-24.7572	24.7572	0.00334409	-0.0386159	14872.8	22	0.176249	0.884945	0	1	14512.9	22	0.0320933	ZC3H7A	GeneID:29066	ZC3H7; HSPC055; ZC3HDC7; FLJ10027; FLJ20318;	NM_014153.2
9343	cg09419670	0.269939	24.5799	24.5799	0.00348345	0.0576996	14361.6	22	0.119469	0.212239	0	1	14453.1	22	0.131985	PSMD5	GeneID:5711	S5B; KIAA0072; MGC23145;	NM_005047.2
14552	cg14547335	0.893088	-24.5799	24.5799	0.00348345	-0.0312597	20410.7	22	0.15879	0.924348	0	1	19653	22	0.0205567	ATP2B2	GeneID:491	PMCA2;	NM_001683.2
17855	cg17829936	0.791414	-24.4716	24.4716	0.0035714	-0.0459569	11618.9	22	0.13231	0.837371	0	1	11478.5	22	0.0713495	TAAR5	GeneID:9038	PNR; RP11-295F4.5;	NM_003967.1
4410	cg04384208	0.715416	-24.2984	24.2984	0.00371672	-0.0545726	10407.9	22	0.144175	0.769988	0	1	10412.2	22	0.0543139	FCGR3A	GeneID:2214	CD16; FCG3; CD16a; FCGR3; IGFR3;	NM_000569.6
4443	cg04415689	0.862483	-24.2138	24.2138	0.00378981	-0.0358402	13511.3	22	0.151268	0.898323	0	1	14095.8	22	0.0147759	TMEM16G	GeneID:50636	NGEP; D-TMPP; IPCA-5; PCANAP5; PCANAP5L;	NM_001001666.1
11642	cg11706163	0.708682	-23.6633	23.6633	0.004302	-0.0547929	6674.72	22	0.13206	0.763475	0	1	6586.25	22	0.0363269	C9	GeneID:735		NM_001737.2
14535	cg14533138	0.791645	-23.6552	23.6552	0.00431003	-0.0453919	7008.66	22	0.160482	0.837037	0	1	6655.85	22	0.0333022	KRTHA3B	GeneID:3884	HA3II; Ha-3II; KRTHA3A; hHa3-II;	NM_002279.3
7550	cg07581973	0.0254892	-23.4111	23.4111	0.00455924	-0.0294914	20353.7	22	0.00931106	0.0549806	0	1	20587.1	22	0.135296	PRDX4	GeneID:10549	AOE37-2;	NM_006406.1
14564	cg14561282	0.723712	-22.8283	22.8283	0.00521394	-0.0526718	7023.45	22	0.107453	0.776384	0	1	7283.97	22	0.0309902	ADAM29	GeneID:11086	svph1;	NM_014269.3
12366	cg12439899	0.0929806	22.4991	22.4991	0.00562464	0.0349948	9508.88	22	0.160422	0.0579858	0	1	9709.85	22	0.0171873	TFAP2A	GeneID:7020	AP-2; AP2TF; TFAP2; AP-2alpha;	NM_003220.1
23256	cg23278885	0.806825	-22.4991	22.4991	0.00562464	-0.0427842	9446.58	22	0.134199	0.849609	0	1	9603.53	22	0.0419353	TGM6	GeneID:343641	TGY; TGM3L; dJ734P14.3;	NM_198994.1
24468	cg24499411	0.699633	-22.3567	22.3567	0.00581211	-0.0546285	8138.94	22	0.138513	0.754262	0	1	7857.01	22	0.0644557	TNS3	GeneID:64759	TEM6; TENS1; FLJ13732; FLJ35545; MGC88434; H_NH049I23.2; DKFZp686M1045;	NM_022748.9
3719	cg03704031	0.109542	-22.2471	22.2471	0.00596056	-0.0429805	10648.6	22	0.179752	0.152523	0	1	10742.2	22	0.236284	INGX	GeneID:27160	ING2; ING1-like; MGC119770; MGC119771;	NR_002226.1
8373	cg08424423	0.900682	-22.2471	22.2471	0.00596056	-0.0290006	11478.3	22	0.146212	0.929683	0	1	11411.6	22	0.0168525	CDSN	GeneID:1041	S; HTSS; D6S586E;	NM_001264.3
14136	cg14162076	0.892241	-22.2471	22.2471	0.00596056	-0.0303245	17722.1	22	0.144487	0.922566	0	1	18870.7	22	0.0171325	CLEC4D	GeneID:338339	MCL; Mpcl; CLEC-6; CLECSF8; MGC40078;	NM_080387.4
247	cg00226923	0.825708	-22.1626	22.1626	0.00607767	-0.0398111	25684.6	22	0.181733	0.865519	0	1	25510.5	22	0.0499923	FGD2	GeneID:221472	ZFYVE4; MGC71330;	NM_173558.2
597	cg00573606	0.86229	-22.1626	22.1626	0.00607767	-0.0346758	11894.9	22	0.122177	0.896966	0	1	11946.7	22	0.0225899	COL6A3	GeneID:1293	DKFZp686D23123; DKFZp686K04147;	NM_004369.2
2192	cg02168291	0.739805	-22.1626	22.1626	0.00607767	-0.0500908	7956.53	22	0.151283	0.789896	0	1	7830.89	22	0.0442765	CDH13	GeneID:1012	CDHH;	NT_010498.15
2669	cg02658251	0.804603	-22.1626	22.1626	0.00607767	-0.0426992	19442.4	22	0.140276	0.847302	0	1	18900.6	22	0.0469813	DEFB4	GeneID:1673	SAP1; DEFB2; HBD-2; DEFB-2; DEFB102;	NM_004942.2
3059	cg03038672	0.832055	-22.1626	22.1626	0.00607767	-0.0389909	5359.43	22	0.110871	0.871045	0	1	5474.86	22	0.0263834	CLDN9	GeneID:9080		NM_020982.2
5230	cg05208153	0.852747	-22.1626	22.1626	0.00607767	-0.0361521	21624.3	22	0.148348	0.8889	0	1	20977.4	22	0.035423	C9orf24	GeneID:84688	CBE1; MGC32921; MGC33614; NYD-SP22; bA573M23.4;	NM_147168.1
18169	cg18152830	0.834225	-22.1626	22.1626	0.00607767	-0.03866	13713.8	22	0.178155	0.872885	0	1	13793.2	22	0.0291005	TNFRSF13B	GeneID:23495	TACI; CD267; MGC39952; MGC133214; TNFRSF14B;	NM_012452.2
25192	cg25193494	0.658368	-22.1626	22.1626	0.00607767	-0.0576257	19344.9	22	0.123211	0.715993	0	1	19638	22	0.0739747	FLJ20186	GeneID:54849		NM_207514.1
13892	cg13928961	0.900936	-22.1425	22.1425	0.00610585	-0.0287407	8216.81	22	0.132391	0.929677	0	1	8325.86	22	0.0158383	K6IRS3	GeneID:319101	KRT6IRS3; MGC129635; MGC129636;	NM_175068.2
14365	cg14375111	0.817457	-21.6345	21.6345	0.00686352	-0.04057	13658.1	22	0.166736	0.858027	0	1	14971	22	0.0359426	TMEM43	GeneID:79188	MGC3222; DKFZp586G1919;	NM_024334.1
25527	cg25527547	0.832889	-21.6141	21.6141	0.00689582	-0.0384831	7653.4	22	0.135054	0.871372	0	1	7426.25	22	0.0244081	PLOD3	GeneID:8985	LH3;	NM_001084.4
4617	cg04567009	0.844617	-21.5724	21.5724	0.00696245	-0.0368325	11957.6	22	0.130727	0.881449	0	1	12847	22	0.0383929	FCGR3B	GeneID:2215	CD16; FCG3; CD16b; FCGR3;	NM_000570.2
1105	cg01091565	0.785809	-21.2465	21.2465	0.00750492	-0.0442305	11006	22	0.147072	0.83004	0	1	11626.3	22	0.031568	MESP1	GeneID:55897	MGC10676; IR1899308;	NM_018670.1
9170	cg09229960	0.0441439	-21.2465	21.2465	0.00750492	-0.0315702	9032.9	22	0.0208433	0.0757141	0	1	9064.01	22	0.129895	EMD	GeneID:2010	STA; EDMD;	NM_000117.1
17853	cg17827767	0.777463	-21.1545	21.1545	0.0076656	-0.0451399	10077.3	22	0.162032	0.822603	0	1	10105.8	22	0.0489948	LRRC21	GeneID:26103	PAL; DKFZP434K091;	NM_015613.1
3871	cg03842617	0.87064	-20.7625	20.7625	0.00838985	-0.0327144	21836.2	22	0.149515	0.903354	0	1	21974.8	22	0.0378541	NOS3	GeneID:4846	eNOS; ECNOS; NOS III;	NM_000603.3
15859	cg15799267	0.304761	-20.7625	20.7625	0.00838985	-0.0606485	13849.2	22	0.070467	0.365409	0	1	13553.5	22	0.0907344	ALOX15B	GeneID:247		NM_001141.1
19186	cg19196684	0.884572	-20.7625	20.7625	0.00838985	-0.0306446	24270.2	22	0.123823	0.915216	0	1	24157.9	22	0.0335677	SLC1A7	GeneID:6512	AAAT; EAAT5;	NM_006671.3
25020	cg25042226	0.907358	-20.7625	20.7625	0.00838985	-0.0271366	13615.9	22	0.136069	0.934495	0	1	13810.8	22	0.0147817	PAX8	GeneID:7849		NM_013951.2
26779	cg26808784	0.898573	-20.7625	20.7625	0.00838985	-0.0284723	8426.58	22	0.126253	0.927045	0	1	8578.55	22	0.0238481	H19	GeneID:283120	ASM; BWS; ASM1; MGC4485; PRO2605; D11S813E;	NT_009237.17
9205	cg09261262	0.80787	-20.5243	20.5243	0.00886284	-0.0409721	10455.8	22	0.158705	0.848842	0	1	11200	22	0.0384893	OPN4	GeneID:94233	MOP;	NM_033282.2
18568	cg18557145	0.787643	-20.5243	20.5243	0.00886284	-0.0434415	14341.7	22	0.162283	0.831084	0	1	13878.5	22	0.0359851	CD72	GeneID:971	LYB2;	NM_001782.1
19782	cg19798224	0.815818	-20.1921	20.1921	0.00956729	-0.0397911	17388.4	22	0.17029	0.855609	0	1	17517.1	22	0.0398023	C14orf68	GeneID:283600	HDMCP; HMFN1655;	NM_207117.2
2599	cg02601403	0.870698	-19.5833	19.5833	0.0110071	-0.0321141	20186.9	22	0.130565	0.902812	0	1	19931.7	22	0.0377552	TBC1D3C	GeneID:414060	MGC44903;	NM_001001418.2
7430	cg07455279	0.288982	19.4722	19.4722	0.0112922	0.0545532	13752.7	22	0.115967	0.234429	0	1	13709.4	22	0.0737315	NDUFA3	GeneID:4696	B9;	NM_004542.1
8169	cg08214029	0.690047	-19.4722	19.4722	0.0112922	-0.0526402	11025.4	22	0.161392	0.742687	0	1	10732.6	22	0.0577189	CCL18	GeneID:6362	CKb7; PARC; AMAC1; DCCK1; MIP-4; AMAC-1; DC-CK1; SCYA18;	NM_002988.2
21343	cg21367957	0.88539	-19.4221	19.4221	0.0114232	-0.0298749	16969	22	0.119233	0.915265	0	1	17186.2	22	0.0217682	F10	GeneID:2159	FX; FXA;	NM_000504.2
18525	cg18508525	0.820463	-19.3024	19.3024	0.0117424	-0.0386722	5254.26	22	0.13977	0.859135	0	1	5574.73	22	0.0308434	CD36	GeneID:948	FAT; GP4; GP3B; GPIV; PASIV; SCARB3;	NM_001001547.1
7029	cg07039113	0.851443	-19.2713	19.2713	0.0118268	-0.0345507	11665	22	0.132591	0.885993	0	1	12119.4	22	0.0272781	S100A9	GeneID:6280	MIF; NIF; P14; CAGB; CFAG; CGLB; L1AG; LIAG; MRP14; 60B8AG; MAC387;	NM_002965.2
25908	cg25933726	0.0475612	-19.2713	19.2713	0.0118268	-0.0309435	12834.3	22	0.0108368	0.0785047	0	1	13091.4	22	0.122232	RPGR	GeneID:6103	CRD; RP3; COD1; PCDX; RP15; XLRP3; orf15; CORDX1;	NM_000328.2
26508	cg26538442	0.812127	-19.2713	19.2713	0.0118268	-0.039633	9948.66	22	0.148827	0.85176	0	1	10434.3	22	0.0235418	FLJ21736	GeneID:79984	ES31;	NM_024922.3
13168	cg13255629	0.832643	-18.8467	18.8467	0.0130415	-0.0367402	8464.04	22	0.143974	0.869383	0	1	8401.89	22	0.0306318	MEPE	GeneID:56955	OF45;	NM_020203.1
23897	cg23936476	0.0297699	-18.8467	18.8467	0.0130415	-0.027645	19887.6	22	0.0157701	0.0574149	0	1	20353.7	22	0.132971	BEX1	GeneID:55859	BEX2; HBEX2; HGR74-h;	NM_018476.3
24373	cg24423088	0.905432	-18.8467	18.8467	0.0130415	-0.0265769	12036.1	22	0.122915	0.932009	0	1	12912.1	22	0.0132283	KRTAP8-1	GeneID:337879	KAP8.1;	NM_175857.3
26379	cg26394940	0.183187	-18.8467	18.8467	0.0130415	-0.0489597	9058.71	22	0.0653304	0.232147	0	1	9127.48	22	0.095469	FLJ10945	GeneID:55267		NM_018280.1
26588	cg26624294	0.0299106	-18.8467	18.8467	0.0130415	-0.0276873	21708.1	22	0.00629591	0.0575979	0	1	22854.7	22	0.0965408	CETN2	GeneID:1069	CALT; CEN2;	NM_004344.1
13847	cg13894021	0.0891588	-18.8432	18.8432	0.0130521	-0.0371256	5039.37	22	0.0270189	0.126284	0	1	5400.78	22	0.109717	RAB36	GeneID:9609		NM_004914.2
21900	cg21930712	0.756769	-18.8328	18.8328	0.0130834	-0.045568	6141.76	22	0.154587	0.802338	0	1	6397.18	22	0.0268142	FLJ40235	GeneID:284369		NM_173635.1
7092	cg07092725	0.806385	-18.4478	18.4478	0.0142963	-0.0396866	3695.67	22	0.099803	0.846072	0	1	4207.38	22	0.0519276	KCNH5	GeneID:27133	EAG2; H-EAG2; Kv10.2;	NM_139318.3
14629	cg14625604	0.047286	-18.4478	18.4478	0.0142963	-0.0303425	16418.1	22	0.00905234	0.0776286	0	1	18007.8	22	0.102128	UBE2A	GeneID:7319	UBC2; HHR6A; RAD6A;	NM_181762.1
17417	cg17391877	0.832534	-18.4478	18.4478	0.0142963	-0.0364636	8588.92	22	0.143352	0.868998	0	1	8771.92	22	0.0279649	PGC	GeneID:5225		NM_002630.1
19058	cg19062189	0.0436708	-18.4478	18.4478	0.0142963	-0.029732	19219.7	22	0.0162957	0.0734028	0	1	20003	22	0.107996	TMSL8	GeneID:11013	TMSNB;	NM_021992.2
21586	cg21601405	0.10937	-18.4478	18.4478	0.0142963	-0.0396271	18845.1	22	0.0446303	0.148998	0	1	19744.9	22	0.0668853	CD40	GeneID:958	p50; Bp50; CDW40; MGC9013; TNFRSF5;	NM_001250.3
26408	cg26424956	0.808537	-18.4106	18.4106	0.0144193	-0.0393751	19296.9	22	0.145266	0.847912	0	1	20075.4	22	0.0438002	GRM4	GeneID:2914	mGlu4; GPRC1D; MGLUR4;	NM_000841.1
689	cg00660989	0.244975	-18.147	18.147	0.0153216	-0.0537522	8645.29	22	0.0558032	0.298728	0	1	8422.47	22	0.0706569	BTBD5	GeneID:54813	FLJ20081;	NM_017658.2
12818	cg12869058	0.778614	-18.147	18.147	0.0153216	-0.0426489	6949.44	22	0.161484	0.821263	0	1	6999.84	22	0.0351274	ABCA4	GeneID:24	FFM; RMP; ABCR; RP19; STGD; ABC10; CORD3; STGD1; DKFZp781N1972;	NM_000350.1
4770	cg04721098	0.749446	-18.0162	18.0162	0.0157897	-0.0456365	6882.75	22	0.159036	0.795083	0	1	7207.97	22	0.0650682	CACNG3	GeneID:10368	Cacng2;	NM_006539.2
5563	cg05556717	0.304598	-17.9631	17.9631	0.0159842	-0.0574144	13729.4	22	0.0818488	0.362013	0	1	14400.9	22	0.0747754	CCL26	GeneID:10344	IMAC; TSC-1; MIP-4a; SCYA26; MGC126714; MIP-4alpha;	NM_006072.4
13184	cg13266631	0.112492	17.9631	17.9631	0.0159842	0.0347439	6231	22	0.137538	0.0777484	0	1	6771.53	22	0.0259167	NEFL	GeneID:4747	NFL; NF-L; NF68; CMT1F; CMT2E;	NM_006158.1
13482	cg13550608	0.875566	-17.8824	17.8824	0.0162841	-0.0303398	14184.6	22	0.126726	0.905906	0	1	14162.7	22	0.0216547	SEMA3B	GeneID:7869	SemA; SEMA5; SEMAA; semaV; LUCA-1; FLJ34863;	NT_022517.17
11812	cg11854877	0.0570603	-17.7763	17.7763	0.0166866	-0.0313935	16525.2	22	0.0403997	0.0884538	0	1	16548.8	22	0.116308	F8A1	GeneID:8263	F8A; HAP40; DXS522E;	NM_012151.3
16064	cg15983005	0.831436	-17.7763	17.7763	0.0166866	-0.0361149	7660.97	22	0.147313	0.867551	0	1	7506.23	22	0.0317076	KRTHA3A	GeneID:3883	HA3I; Ha-3I; Krt1-3; hHa3-I;	NM_004138.2
19052	cg19055639	0.0603499	-17.7763	17.7763	0.0166866	-0.0319067	8747.85	22	0.0200695	0.0922566	0	1	9468.82	22	0.0845524	ARMCX2	GeneID:9823	ALEX2; MGC8742; KIAA0512; MGC13343;	NM_177949.1
7855	cg07895149	0.0538986	17.7043	17.7043	0.0169657	0.0264681	16797.2	22	0.0932215	0.0274306	0	1	16551.9	22	0.0118015	FAM26B	GeneID:51063		NM_015916.3
22376	cg22407458	0.0862428	17.6702	17.6702	0.0170994	0.0310165	15259	22	0.132587	0.0552263	0	1	15028.4	22	0.0214815	TCP11	GeneID:6954	D6S230E; KIAA0229; MGC111103;	NM_018679.2
20731	cg20781967	0.544383	17.544	17.544	0.0176034	0.0603724	7619.55	22	0.129694	0.484011	0	1	8381.5	22	0.0936267	NINJ2	GeneID:4815		NM_016533.4
21294	cg21307628	0.812669	-17.5306	17.5306	0.0176579	-0.0381943	6493.16	22	0.149791	0.850863	0	1	6625.6	22	0.0161672	URB	GeneID:151887	DRO1; SSG1;	NM_199511.1
3012	cg02998425	0.814011	-17.5218	17.5218	0.0176937	-0.037959	8516.87	22	0.125057	0.85197	0	1	8533.37	22	0.035263	ADAM21	GeneID:8747	ADAM31; MGC125389;	NM_003813.2
21507	cg21518947	0.734818	-17.5218	17.5218	0.0176937	-0.0465117	21680.6	22	0.158332	0.78133	0	1	21641.8	22	0.0577857	CABP4	GeneID:57010		NM_145200.2
21839	cg21860846	0.0276905	-17.5218	17.5218	0.0176937	-0.0263569	27411.7	22	0.0102048	0.0540474	0	1	28479.7	22	0.1104	ELK1	GeneID:2002		NM_005229.2
26204	cg26220985	0.805418	-17.5218	17.5218	0.0176937	-0.0389897	7965.45	22	0.145889	0.844408	0	1	8558.18	22	0.0359673	DPT	GeneID:1805	TRAMP;	NM_001937.3
18322	cg18328334	0.61102	17.4809	17.4809	0.0178612	0.0584587	8382.39	22	0.109108	0.552561	0	1	8088.63	22	0.100739	TNS1	GeneID:7145	TNS; MGC88584;	NM_022648.3
16554	cg16483466	0.816124	-17.4358	17.4358	0.0180475	-0.0376291	16403.4	22	0.164285	0.853753	0	1	16329.4	22	0.0409501	C20orf186	GeneID:149954	RY2G5; LPLUNC4; dJ726C3.5;	NM_182519.1
3376	cg03364781	0.706949	-17.3533	17.3533	0.0183935	-0.0488166	4807.87	22	0.132125	0.755766	0	1	4965.44	22	0.0431727	ALPK1	GeneID:80216	LAK; FLJ22670; KIAA1527; 8430410J10Rik;	NM_025144.2
26332	cg26353877	0.85998	-17.165	17.165	0.0192087	-0.0319451	14958.2	22	0.0931451	0.891925	0	1	16253.2	22	0.0187167	APCS	GeneID:325	SAP; PTX2; MGC88159;	NM_001639.2
10117	cg10198837	0.870488	-17.1363	17.1363	0.0193361	-0.030514	6826.04	22	0.0595118	0.901002	0	1	7440.65	22	0.0241336	CD8B1	GeneID:926	Ly3; CD8B; LYT3; Leu2; MGC119115;	NM_004931.2
11433	cg11494699	0.758828	-17.0576	17.0576	0.0196896	-0.043686	8684.38	22	0.106611	0.802514	0	1	8982.38	22	0.0267818	RAG1	GeneID:5896	RNF74; MGC43321;	NM_000448.1
19298	cg19305227	0.77221	-17.0576	17.0576	0.0196896	-0.0422883	6454.58	22	0.12321	0.814498	0	1	6785.24	22	0.0261303	SLC28A2	GeneID:9153	CNT2; HCNT2; SPNT1; HsT17153;	NM_004212.1
4278	cg04256470	0.905447	-16.954	16.954	0.0201652	-0.0255135	12154.1	22	0.121913	0.93096	0	1	12984.1	22	0.0147437	CORT	GeneID:1325	CST-14; CST-17; CST-29;	NM_001302.3
9864	cg09936839	0.739512	-16.8976	16.8976	0.0204286	-0.0454016	7938.07	22	0.136223	0.784914	0	1	8753.61	22	0.0376348	SIRT6	GeneID:51548	SIR2L6;	NM_016539.1
23503	cg23545272	0.0571264	-16.8976	16.8976	0.0204286	-0.0306952	9300.93	22	0.0154535	0.0878216	0	1	9149.16	22	0.115767	EFNB1	GeneID:1947	CFND; CFNS; EFL3; EPLG2; Elk-L; LERK2; MGC8782;	NT_011669.16
27096	cg27153400	0.0734188	16.8976	16.8976	0.0204286	0.0287342	17960.5	22	0.088989	0.0446846	0	1	17224.8	22	0.0387554	ISOC2	GeneID:79763		NM_024710.1
7412	cg07440877	0.884461	-16.853	16.853	0.0206395	-0.0284017	16335.5	22	0.142317	0.912862	0	1	15862.2	22	0.0347238	FLJ46358	GeneID:400110		NM_207439.2
24460	cg24494556	0.0383194	-16.7816	16.7816	0.0209817	-0.0276179	12129.4	22	0.0136697	0.0659373	0	1	13321.6	22	0.118876	ZNF11B	GeneID:7558	KOX2; FLJ23327;	NM_006955.1
3002	cg02992596	0.734281	-16.7089	16.7089	0.0213359	-0.0456785	17967.3	22	0.121814	0.77996	0	1	17618.4	22	0.0659551	MGC27016	GeneID:166863		NM_144979.2
14041	cg14076161	0.721991	-16.7089	16.7089	0.0213359	-0.0468336	11777	22	0.162626	0.768825	0	1	11409.7	22	0.0600767	PRB4	GeneID:5545	Po;	NM_002723.3
15452	cg15452204	0.519063	-16.7089	16.7089	0.0213359	-0.0584645	8256.12	22	0.107366	0.577527	0	1	8119.42	22	0.0633249	CDX1	GeneID:1044		NM_001804.1
7192	cg07207789	0.599172	-16.69	16.69	0.0214289	-0.0553207	8403.04	22	0.0725939	0.654493	0	1	8781.94	22	0.0783772	CRISPLD2	GeneID:83716	CRISP11; LCRISP2; MGC74865; DKFZP434B044;	NM_031476.1
9846	cg09920632	0.0668689	-16.69	16.69	0.0214289	-0.0319492	13858.5	22	0.0261512	0.0988181	0	1	14261.6	22	0.0943318	PHF8	GeneID:23133	ZNF422; KIAA1111; DKFZp686E0868;	NM_015107.1
9849	cg09923855	0.0316314	-16.69	16.69	0.0214289	-0.026357	14692.5	22	0.00997819	0.0579884	0	1	14836.7	22	0.113215	HTATSF1	GeneID:27336	TAT-SF1; dJ196E23.2;	NM_014500.3
9964	cg10051054	0.832035	-16.69	16.69	0.0214289	-0.035031	6584.31	22	0.142516	0.867066	0	1	6899.31	22	0.043689	CCDC27	GeneID:148870	FLJ32825; MGC138313; MGC138317; RP1-286D6.1;	NM_152492.1
17709	cg17703324	0.866003	-16.69	16.69	0.0214289	-0.0307016	7102.62	22	0.152069	0.896705	0	1	7063.22	22	0.0195846	OPTC	GeneID:26254	OPT;	NM_014359.3
20621	cg20664247	0.683405	-16.69	16.69	0.0214289	-0.0498874	24674.9	22	0.14239	0.733292	0	1	24745	22	0.067406	PEX10	GeneID:5192	NALD; RNF69; MGC1998;	NM_002617.3
24901	cg24928161	0.816651	-16.69	16.69	0.0214289	-0.036916	6854.46	22	0.0958777	0.853567	0	1	7602.16	22	0.0237402	SHBG	GeneID:6462	ABP; MGC126834;	NM_001040.2
10250	cg10321723	0.900632	-16.6635	16.6635	0.0215602	-0.025932	11753.9	22	0.109922	0.926564	0	1	11737.9	22	0.0148077	PDZK1	GeneID:5174	CAP70; CLAMP; PDZD1;	NM_002614.3
4038	cg03991512	0.585939	-16.6552	16.6552	0.0216011	-0.0558177	18780.8	22	0.104237	0.641756	0	1	18864.2	22	0.087528	LDHD	GeneID:197257	MGC57726;	NM_153486.2
25788	cg25813820	0.0354097	-16.6175	16.6175	0.0217897	-0.0269066	11866.4	22	0.0146824	0.0623163	0	1	12008.4	22	0.0803371	MPP1	GeneID:4354	MRG1; PEMP; AAG12; EMP55; DXS552; DXS552E;	NM_002436.2
24795	cg24824840	0.83756	-16.6124	16.6124	0.0218153	-0.0342436	9386.52	22	0.14436	0.871804	0	1	9289.24	22	0.03016	SHANK1	GeneID:50944	SSTRIP; SPANK-1; synamon;	NM_016148.1
12599	cg12653105	0.0388763	-16.6108	16.6108	0.0218234	-0.0274387	24042.2	22	0.0200744	0.066315	0	1	24325.4	22	0.130207	PLP2	GeneID:5355	A4; A4-LSB; MGC126187;	NM_002668.1
1444	cg01429391	0.866865	-16.4034	16.4034	0.0228906	-0.0303904	11433.2	22	0.153583	0.897255	0	1	11988.2	22	0.0272464	MYH7	GeneID:4625	CMH1; MPD1; CMD1S; MYHCB; MGC138376; MGC138378;	NM_000257.1
5925	cg05935584	0.0520469	-16.3564	16.3564	0.0231398	-0.0293623	10046.4	22	0.0495457	0.0814092	0	1	11052.6	22	0.128308	HMGB3	GeneID:3149	HMG4; HMG2A; MGC90319;	NM_005342.2
19554	cg19560971	0.760523	-16.3564	16.3564	0.0231398	-0.0426547	14052.7	22	0.140132	0.803178	0	1	14291.5	22	0.0269532	MFRP	GeneID:83552	NNO2; FLJ30570;	NM_031433.1
18523	cg18507125	0.0544138	-16.2221	16.2221	0.0238667	-0.0296419	14053.4	22	0.00911867	0.0840556	0	1	13591.3	22	0.115333	RPL36A	GeneID:6173	L44L; MIG6; RPL44; MGC72020;	NM_021029.3
21623	cg21627181	0.822855	-16.1746	16.1746	0.0241288	-0.0357237	6861.95	22	0.150475	0.858579	0	1	6924.87	22	0.0319308	SLC17A4	GeneID:10050	KAIA2138; MGC129623;	NM_005495.1
8078	cg08109646	0.753875	-16.1202	16.1202	0.0244333	-0.043118	7029.55	22	0.160619	0.796992	0	1	6965.67	22	0.0333194	ZNF683	GeneID:257101	MGC33414; RP11-569G9.6;	NM_173574.1
6859	cg06862644	0.872617	-16.0103	16.0103	0.0250596	-0.0293976	14614.8	22	0.130496	0.902015	0	1	14077.2	22	0.0208862	SPATA22	GeneID:84690	NYD-SP20;	NM_032598.2
10948	cg11037772	0.270504	-16.0103	16.0103	0.0250596	-0.0525854	25349.1	22	0.103902	0.323089	0	1	28171.6	22	0.0680754	POLR3C	GeneID:10623	RPC3; RPC62;	NM_006468.5
24296	cg24346637	0.820734	-15.9441	15.9441	0.025444	-0.0358015	14403.9	22	0.151887	0.856535	0	1	13993.6	22	0.0413088	UBL4B	GeneID:164153	FLJ25690;	NM_203412.1
12810	cg12864235	0.594509	-15.9426	15.9426	0.0254532	-0.0545363	2799.62	22	0.0790131	0.649046	0	1	2818.78	22	0.0805481	CDH9	GeneID:1007		NM_016279.2
27346	cg27412093	0.828293	-15.9426	15.9426	0.0254532	-0.0348833	8148.6	22	0.143558	0.863176	0	1	8362.46	22	0.0280773	CAPN9	GeneID:10753	GC36; nCL-4;	NM_006615.2
1552	cg01530101	0.153838	15.9283	15.9283	0.025537	0.0378827	26272.6	22	0.123098	0.115956	0	1	24963.1	22	0.0708858	KCNQ1DN	GeneID:55539	BWRT; HSA404617;	NT_009237.17
2188	cg02164442	0.773783	-15.9283	15.9283	0.025537	-0.040907	17784.2	22	0.112609	0.81469	0	1	17741.1	22	0.0529205	ITGAD	GeneID:3681	ADB2; CD11D; FLJ39841;	NM_005353.2
13228	cg13300756	0.819115	-15.8908	15.8908	0.0257584	-0.0358892	18918.3	22	0.127984	0.855004	0	1	19661.6	22	0.0424739	HAS1	GeneID:3036	HAS;	NM_001523.1
16872	cg16825000	0.787218	-15.8908	15.8908	0.0257584	-0.039435	11020.5	22	0.109185	0.826653	0	1	11114.9	22	0.0441484	PLA2G2E	GeneID:30814		NM_014589.1
3306	cg03287877	0.746037	-15.8298	15.8298	0.0261229	-0.0435091	3315.63	22	0.155194	0.789546	0	1	3415.01	22	0.0362564	DCAKD	GeneID:79877	FLJ22955;	NM_024819.3
4178	cg04126866	0.785836	-15.8298	15.8298	0.0261229	-0.0395281	20971.7	22	0.141983	0.825364	0	1	22163.9	22	0.0350236	C10orf99	GeneID:387695	UNQ1833; FLJ21763;	NM_207373.1
14123	cg14153740	0.826133	-15.812	15.812	0.0262303	-0.0349825	6451.79	22	0.151088	0.861116	0	1	6699.65	22	0.0297096	TRY1	GeneID:136541	TRYX3; UNQ2540; FLJ16649; MGC35022;	NM_001001317.1
1959	cg01939428	0.214573	15.7457	15.7457	0.0266337	0.0438774	7633.15	22	0.0959914	0.170695	0	1	8086.85	22	0.0469813	UBE3C	GeneID:9690	KIAA10; KIAA0010;	NM_014671.1
13073	cg13156121	0.843876	-15.5634	15.5634	0.0277751	-0.0326963	15086.5	22	0.142899	0.876572	0	1	15552.3	22	0.018515	TEPP	GeneID:374739	MGC129930; MGC129931;	NM_199456.1
22399	cg22427279	0.581583	-15.5634	15.5634	0.0277751	-0.0546124	2505.9	22	0.142865	0.636196	0	1	2581.45	22	0.0536251	NHLH2	GeneID:4808	HEN2; NSCL2;	NM_005599.2
23728	cg23767977	0.881008	-15.523	15.523	0.0280347	-0.0279307	14814	22	0.147264	0.908939	0	1	14078.4	22	0.0260136	KRT6IRS	GeneID:112802	K6IRS1; KRT6IRS1; MGC119390; MGC119391;	NM_033448.1
2231	cg02205962	0.0454019	-15.48	15.48	0.0283141	-0.0276788	9512	22	0.0221114	0.0730807	0	1	10032.8	22	0.132611	BCAP31	GeneID:10134	CDM; BAP31; 6C6-AG; DXS1357E;	NM_005745.6
5535	cg05517711	0.726386	-15.48	15.48	0.0283141	-0.0449594	15331.5	22	0.148803	0.771345	0	1	15590.1	22	0.0386867	ST6GALNAC6	GeneID:30815	SIAT7F; ST6GALNACVI; RP11-203J24.3;	NM_013443.3
27041	cg27087809	0.760821	-15.3402	15.3402	0.02924	-0.0416598	7961.12	22	0.122863	0.802481	0	1	7896.77	22	0.0303455	ACSBG1	GeneID:23205	BG1; BGM; hBG1; hsBG; GR-LACS; FLJ30320; KIAA0631; MGC14352;	NM_015162.3
9291	cg09354331	0.841141	-15.2928	15.2928	0.029561	-0.0328276	9864.77	22	0.149666	0.873969	0	1	9600.35	22	0.0339243	RAI17	GeneID:57178	Zimp10; FLJ13541; KIAA1224;	NM_020338.2
27425	cg27495908	0.737862	-15.2928	15.2928	0.029561	-0.043768	4608.51	22	0.151524	0.78163	0	1	4807.11	22	0.0565893	C9orf79	GeneID:286234	FLJ35866;	NM_178828.3
8785	cg08822227	0.166418	-15.1662	15.1662	0.0304353	-0.0428754	18938.1	22	0.122687	0.209294	0	1	18956	22	0.135871	SH3BP2	GeneID:6452	CRBM; CRPM; RES4-23;	NM_003023.2
24282	cg24340926	0.0271159	-15.143	15.143	0.0305988	-0.0246026	17854.9	22	0.00739236	0.0517185	0	1	18893	22	0.104942	RAB33A	GeneID:9363	RabS10; MGC1488;	NM_004794.2
9773	cg09863066	0.646075	-15.0139	15.0139	0.0315218	-0.0505395	23873.8	22	0.146648	0.696614	0	1	23303.6	22	0.056707	PVALB	GeneID:5816	D22S749; MGC116759;	NM_002854.2
21705	cg21697779	0.0656756	-15.0139	15.0139	0.0315218	-0.0303576	9125.47	22	0.0190413	0.0960332	0	1	9130.53	22	0.0683779	FUNDC2	GeneID:65991	DC44; HCC3; HCBP6; MGC2495; PD03104; FLJ33773;	NM_023934.3
24836	cg24870391	0.858431	-15.0139	15.0139	0.0315218	-0.0305181	13941.4	22	0.162449	0.888949	0	1	13949.8	22	0.0263977	CCL11	GeneID:6356	SCYA11; MGC22554;	NM_002986.2
8264	cg08314660	0.925519	-14.9311	14.9311	0.0321285	-0.0214772	26623.3	22	0.125796	0.946996	0	1	25570.5	22	0.0186058	PKP3	GeneID:11187		NM_007183.2
20488	cg20540913	0.0311831	-14.9143	14.9143	0.0322527	-0.0251018	15895.2	22	0.0102541	0.0562849	0	1	16240.7	22	0.0937432	EDA	GeneID:1896	ED1; HED; EDA1; EDA2; XHED; XLHED; ED1-A1; ED1-A2;	NM_001399.4
1581	cg01564343	0.804778	-14.8951	14.8951	0.0323956	-0.0366961	14841.2	22	0.129196	0.841474	0	1	15540.3	22	0.0405973	TREML1	GeneID:340205	TLT1; TLT-1; PRO3438; GLTL1825; MGC119173; dJ238O23.3;	NM_178174.2
16160	cg16080552	0.445291	14.8951	14.8951	0.0323956	0.0560136	5133.19	22	0.132328	0.389277	0	1	5653.69	22	0.155119	TACSTD2	GeneID:4070	M1S1; EGP-1; GA733; TROP2; GA733-1;	NM_002353.1
25239	cg25242557	0.125818	14.8784	14.8784	0.0325205	0.0338353	39865.9	22	0.1548	0.0919828	0	1	39599.3	22	0.0416507	PAX6	GeneID:5080	AN; AN2; MGDA; WAGR; D11S812E; MGC17209;	NM_000280.2
10771	cg10876928	0.65291	-14.8085	14.8085	0.0330481	-0.0498358	10612.6	22	0.136942	0.702745	0	1	10550.8	22	0.0557558	SDC4	GeneID:6385	SYND4; MGC22217;	NM_002999.2
3163	cg03140978	0.85564	-14.7063	14.7063	0.0338354	-0.0306505	8927.69	22	0.101214	0.88629	0	1	9371.6	22	0.0184762	C1orf201	GeneID:90529	FLJ33340;	NM_178122.2
21693	cg21686987	0.827311	-14.6833	14.6833	0.0340148	-0.0340056	18675.8	22	0.162613	0.861316	0	1	18010.5	22	0.0411789	CTRB1	GeneID:1504	CTRB; FLJ42412; MGC88037;	NM_001906.3
187	cg00174500	0.840389	-14.6401	14.6401	0.0343554	-0.0324337	9791.89	22	0.168307	0.872823	0	1	10136.2	22	0.0325872	CMTM5	GeneID:116173	CKLFSF5; FLJ37521;	NM_138460.2
10936	cg11024597	0.352838	-14.6401	14.6401	0.0343554	-0.0546764	8988.42	22	0.0889308	0.407514	0	1	9225.8	22	0.0814295	ECRG4	GeneID:84417		NM_032411.1
10114	cg10193817	0.0923845	14.6222	14.6222	0.0344965	0.0296117	14087	22	0.106214	0.0627728	0	1	14540	22	0.0179036	IGSF4	GeneID:23705	BL2; ST17; NECL2; TSLC1; IGSF4A; SYNCAM; sTSLC-1; synCAM1; DKFZp686F1789;	NM_014333.2
24338	cg24389347	0.822178	-14.5905	14.5905	0.0347493	-0.034498	10275.2	22	0.12686	0.856676	0	1	10308.5	22	0.0393517	C3orf22	GeneID:152065	MGC34728;	NM_152533.1
2646	cg02635407	0.326402	-14.5105	14.5105	0.0353954	-0.0535118	28294.7	22	0.09105	0.379913	0	1	28873.1	22	0.0500457	SH3TC1	GeneID:54436	FLJ20356;	NM_018986.2
15795	cg15756091	0.835234	-14.5105	14.5105	0.0353954	-0.0329311	8817.02	22	0.104853	0.868165	0	1	9261.88	22	0.0195895	RGSL2	GeneID:84227	DKFZp434E169;	NM_032267.1
11836	cg11880010	0.690772	-14.4533	14.4533	0.035865	-0.0467771	2702.34	22	0.153579	0.737549	0	1	2699.36	22	0.0314861	KIAA0367	GeneID:23273	BMCC1; BNIPXL; A214N16.3; bA214N16.3;	NM_015225.1
14190	cg14209870	0.857622	-14.4401	14.4401	0.0359737	-0.0301926	7184.3	22	0.120625	0.887814	0	1	7256.93	22	0.0254956	TAS2R5	GeneID:54429	T2R5;	NM_018980.2
9255	cg09309269	0.294639	-14.433	14.433	0.0360327	-0.051856	5118.18	22	0.0648411	0.346494	0	1	5223.19	22	0.0988683	PSMD11	GeneID:5717	S9; p44.5; MGC3844;	NM_002815.2
4041	cg03993463	0.896854	-14.3074	14.3074	0.0370904	-0.0250913	14478.1	22	0.132006	0.921946	0	1	14085.4	22	0.0214445	KCNJ15	GeneID:3772	KIR1.3; KIR4.2; MGC13584;	NM_002243.3
11409	cg11474811	0.78369	-14.2464	14.2464	0.0376152	-0.0383594	12247.5	22	0.156918	0.822049	0	1	12460.1	22	0.0328378	TRPM5	GeneID:29850	MTR1; LTRPC5;	NM_014555.2
8379	cg08431931	0.241156	-14.1568	14.1568	0.0383994	-0.0482147	7249.52	22	0.107213	0.289371	0	1	7226.56	22	0.103226	MGC26816	GeneID:164684		NM_152613.1
23028	cg23067535	0.645867	-14.1291	14.1291	0.0386451	-0.0494971	5246.19	22	0.194608	0.695364	0	1	5178.99	22	0.212113	FAM83A	GeneID:84985	BJ-TSA-9; MGC14128;	NM_032899.4
6330	cg06356454	0.902489	14.0874	14.0874	0.0390177	0.0278492	6677.99	22	0.0554696	0.87464	0	1	6465.35	22	0.112036	AQP12A	GeneID:375318	AQP12;	NM_198998.1
19098	cg19109431	0.77329	-14.0874	14.0874	0.0390177	-0.0392521	3472.22	22	0.139917	0.812542	0	1	3593.24	22	0.0394537	NFKBIE	GeneID:4794	IKBE;	NM_004556.2
21592	cg21604856	0.733932	-14.0774	14.0774	0.0391079	-0.042865	6478.96	22	0.133772	0.776798	0	1	6564.69	22	0.0346606	SUHW1	GeneID:129025	ZNF280; ZNF636; 3 OY11.1;	NM_080740.3
21987	cg22021786	0.864383	-14.0774	14.0774	0.0391079	-0.0291153	10672.5	22	0.162097	0.893498	0	1	9730.72	22	0.0326207	WFDC8	GeneID:90199	WAP8; C20orf170; dJ461P17.1;	NM_181510.1
5221	cg05194726	0.293641	14.0757	14.0757	0.0391229	0.0483257	5153.8	22	0.088678	0.245315	0	1	5158.25	22	0.0638955	NRIP2	GeneID:83714	DKFZP761G1913;	NM_031474.1
8125	cg08159444	0.49876	14.0757	14.0757	0.0391229	0.0554282	4734.97	22	0.13344	0.443332	0	1	4664.41	22	0.121486	PNMA5	GeneID:114824	KIAA1934;	NM_052926.1
7122	cg07123548	0.85231	-14.0731	14.0731	0.0391467	-0.0305489	30342.3	22	0.150729	0.882859	0	1	29687.8	22	0.045152	HIPK4	GeneID:147746	FLJ32818;	NM_144685.3
2350	cg02311163	0.803014	-14.0039	14.0039	0.0397753	-0.0360501	4761.69	22	0.126546	0.839064	0	1	4989.9	22	0.030183	SEMG2	GeneID:6407	SGII;	NM_003008.2
4481	cg04453065	0.0612585	14.0039	14.0039	0.0397753	0.0251271	12711.2	22	0.120425	0.0361314	0	1	13052.2	22	0.012027	CYR61	GeneID:3491	CCN1; GIG1; IGFBP10;	NM_001554.3
7307	cg07327347	0.789944	-14.0039	14.0039	0.0397753	-0.0373517	11787.5	22	0.179423	0.827295	0	1	11817.5	22	0.0975208	AQP8	GeneID:343		NM_001169.2
8385	cg08434396	0.101773	-14.0039	14.0039	0.0397753	-0.0341832	5281.74	22	0.043521	0.135957	0	1	5397.74	22	0.0925399	FMR1	GeneID:2332	FMRP; FRAXA; MGC87458;	NM_002024.3
12747	cg12799895	0.0841511	14.0039	14.0039	0.0397753	0.0281069	23890.5	22	0.0521857	0.0560442	0	1	24851	22	0.0252484	NPTX2	GeneID:4885	NP2; NARP; NP-II;	NM_002523.1
14311	cg14324838	0.857767	14.0039	14.0039	0.0397753	0.0336936	6868.43	22	0.0717869	0.824074	0	1	6893.14	22	0.144412	EPB41L1	GeneID:2036	4.1N; KIAA0338; MGC11072;	NM_012156.2
19291	cg19297688	0.779089	-14.0039	14.0039	0.0397753	-0.0384933	3892.58	22	0.153842	0.817582	0	1	3923.3	22	0.0384656	INSL4	GeneID:3641	EPIL; PLACENTIN;	NM_002195.1
21116	cg21148892	0.843015	-14.0039	14.0039	0.0397753	-0.0315928	17280	22	0.129587	0.874608	0	1	17152.2	22	0.0381558	CLEC4F	GeneID:165530	KCLR; CLECSF13; FLJ39110;	NM_173535.2
23727	cg23765993	0.740874	-14.0039	14.0039	0.0397753	-0.0421455	4057.38	22	0.141866	0.783019	0	1	4038.01	22	0.0327868	SPINLW1	GeneID:57119	WAP7; EPPIN; WFDC7; EPPIN1; EPPIN2; EPPIN3; dJ461P17.2;	NM_181502.1
26611	cg26647600	0.72165	-14.0039	14.0039	0.0397753	-0.0437084	4555.21	22	0.159964	0.765359	0	1	4812.82	22	0.0397227	CCR8	GeneID:1237	CY6; TER1; CKRL1; CDw198; CKR-L1; CMKBR8; CMKBRL2; GPR-CY6; MGC129966; MGC129973;	NM_005201.2
18548	cg18535534	0.0327098	-13.9471	13.9471	0.0402989	-0.0245741	18015.9	22	0.00985353	0.057284	0	1	18572.6	22	0.0755492	BCORL1	GeneID:63035	FLJ11362; B930011H20Rik;	NM_021946.2
7279	cg07297906	0.0277368	-13.9443	13.9443	0.0403249	-0.0237813	27284.2	22	0.0169221	0.0515181	0	1	27674.1	22	0.102149	GPC3	GeneID:2719	SGB; DGSX; SDYS; SGBS; SGBS1;	NM_004484.2
10329	cg10409560	0.816858	-13.9443	13.9443	0.0403249	-0.0344041	7121.5	22	0.158826	0.851262	0	1	7609.05	22	0.0226971	FLJ23657	GeneID:152816		NM_178497.2
10657	cg10756887	0.113237	13.9443	13.9443	0.0403249	0.0314742	25171.2	22	0.0787109	0.0817628	0	1	24855.2	22	0.0324763	C22orf15	GeneID:150248	N27C7-3; FLJ36561;	NM_182520.1
12827	cg12878228	0.776228	-13.9443	13.9443	0.0403249	-0.0386153	14384.6	22	0.161579	0.814844	0	1	13842.5	22	0.0499832	PRSS1	GeneID:5644	TRP1; TRY1; TRY4; TRYP1; MGC120175;	NM_002769.2
19649	cg19668234	0.477469	-13.9443	13.9443	0.0403249	-0.0549136	11510.4	22	0.135082	0.532383	0	1	11993.3	22	0.0589976	TSP50	GeneID:29122		NM_013270.2
21765	cg21770617	0.831708	-13.9443	13.9443	0.0403249	-0.0327504	21297	22	0.136086	0.864458	0	1	22100	22	0.016547	FAM3D	GeneID:131177	EF7; OIT1;	NM_138805.2
25645	cg25661884	0.517362	-13.9443	13.9443	0.0403249	-0.0542433	6484.35	22	0.108746	0.571605	0	1	6661.15	22	0.0552364	RDH8	GeneID:50700	PRRDH;	NM_015725.1
20457	cg20504202	0.0615698	-13.8529	13.8529	0.0411822	-0.0286699	11250.9	22	0.015202	0.0902397	0	1	11970.6	22	0.096388	RP1-112K5.2	GeneID:90121	MGC20451;	NM_058163.1
8638	cg08695223	0.0346393	-13.7454	13.7454	0.0422144	-0.0246922	13476.9	22	0.0116997	0.0593315	0	1	12967.9	22	0.108681	SLC9A6	GeneID:10479	NHE6; KIAA0267;	NM_006359.1
21078	cg21111471	0.755584	-13.7454	13.7454	0.0422144	-0.0403963	10879	22	0.146319	0.79598	0	1	10483.5	22	0.0499553	FLRT1	GeneID:23769	MGC21624;	NM_013280.4
9583	cg09638834	0.163984	13.7207	13.7207	0.0424549	0.0368524	6034.01	22	0.140058	0.127132	0	1	5953.2	22	0.0389725	RAET1L	GeneID:154064		NM_130900.1
15555	cg15554401	0.880913	-13.7207	13.7207	0.0424549	-0.0266615	19983.9	22	0.153911	0.907575	0	1	20652.7	22	0.0387904	GJB4	GeneID:127534	CX30.3; MGC21116;	NM_153212.1
4856	cg04797496	0.773414	-13.6028	13.6028	0.0436235	-0.038589	6767.33	22	0.166534	0.812003	0	1	6803.91	22	0.0482803	PCDH12	GeneID:51294	VECAD2; VE-cadherin-2;	NM_016580.2
21936	cg21964481	0.903121	-13.5455	13.5455	0.0442032	-0.0237067	17413	22	0.121187	0.926828	0	1	17349.9	22	0.0168832	SLC34A3	GeneID:142680	HHRH; NPTIIc; FLJ38680;	NM_080877.1
92	cg00079563	0.0570833	13.4766	13.4766	0.0449094	0.024236	14058.4	22	0.1238	0.0328473	0	1	14784.7	22	0.0137111	ARFGAP3	GeneID:26286	ARFGAP1;	NM_014570.3
7164	cg07175007	0.737152	-13.4766	13.4766	0.0449094	-0.0417935	12541.4	22	0.0902647	0.778946	0	1	12857.1	22	0.0661632	UHMK1	GeneID:127933	KIS; Kist;	NM_175866.2
15608	cg15595739	0.799389	-13.4766	13.4766	0.0449094	-0.0358745	4387.17	22	0.0944225	0.835264	0	1	4663.07	22	0.0334351	RGS9	GeneID:8787	PERRS; RGS9L; MGC26458; MGC111763;	NM_003835.1
15993	cg15916061	0.82607	-13.4766	13.4766	0.0449094	-0.033002	13011.9	22	0.166797	0.859072	0	1	12996	22	0.0365666	SLC17A4	GeneID:10050	KAIA2138; MGC129623;	NM_005495.1
8378	cg08430598	0.88229	-13.4671	13.4671	0.0450084	-0.0263037	12549.8	22	0.112058	0.908594	0	1	12466.3	22	0.0149749	CST1	GeneID:1469		NM_001898.2
11164	cg11235426	0.350815	13.4671	13.4671	0.0450084	0.0505966	12622	22	0.145983	0.300219	0	1	12559	22	0.155322	DUSP22	GeneID:56940	VHX; JKAP; JSP1; MKPX;	NM_020185.3
12888	cg12949760	0.474986	-13.4671	13.4671	0.0450084	-0.0541877	9971.42	22	0.136862	0.529174	0	1	10289.1	22	0.0715395	KCNQ1	GeneID:3784	LQT; RWS; WRS; LQT1; ATFB1; KCNA8; KCNA9; Kv1.9; Kv7.1; KVLQT1;	NT_009237.17
26075	cg26099316	0.815986	-13.4671	13.4671	0.0450084	-0.0340615	14171.9	22	0.152121	0.850047	0	1	14014.5	22	0.0485169	ITIH3	GeneID:3699	H3P;	NM_002217.2
1163	cg01145396	0.688729	-13.441	13.441	0.0452799	-0.0454517	6867.87	22	0.12666	0.734181	0	1	7326.69	22	0.0330397	CHRNG	GeneID:1146	ACHRG;	NM_005199.4
16188	cg16112945	0.734303	-13.441	13.441	0.0452799	-0.0419183	8366.77	22	0.162199	0.776222	0	1	8142.57	22	0.0384602	ADAMTS13	GeneID:11093	TTP; VWFCP; C9orf8; vWF-CP; MGC118899; MGC118900; DKFZp434C2322;	NM_139025.2
19555	cg19561186	0.571831	-13.441	13.441	0.0452799	-0.0518669	1222.48	22	0.101237	0.623698	0	1	1300.07	22	0.0732503	GUCA1C	GeneID:9626	GCAP3; MGC120158; MGC120159;	NM_005459.2
24345	cg24396745	0.0811209	13.441	13.441	0.0452799	0.027231	20373.6	22	0.0429497	0.0538899	0	1	20843.2	22	0.0126033	HCN4	GeneID:10021		NM_005477.1
24980	cg25011395	0.792473	-13.441	13.441	0.0452799	-0.0364687	7943.57	22	0.124945	0.828941	0	1	7919.56	22	0.0359743	CNTROB	GeneID:116840	LIP8; PP1221;	NM_053051.1
851	cg00830029	0.635994	13.4361	13.4361	0.0453307	0.0513366	12994.7	22	0.100225	0.584657	0	1	13901.9	22	0.0772791	NRIP2	GeneID:83714	DKFZP761G1913;	NM_031474.1
8151	cg08191915	0.795544	-13.4361	13.4361	0.0453307	-0.0361167	10303.7	22	0.148674	0.831661	0	1	10544.6	22	0.0357356	PANX3	GeneID:116337		NM_052959.2
11447	cg11505080	0.269238	-13.4247	13.4247	0.0454496	-0.0486673	10971	22	0.079791	0.317905	0	1	11849.1	22	0.0545087	GPR173	GeneID:54328	SREB3;	NM_018969.3
14188	cg14209518	0.80524	-13.4247	13.4247	0.0454496	-0.0350884	7730.85	22	0.155355	0.840328	0	1	7534.52	22	0.0154353	NNMT	GeneID:4837		NM_006169.2
13363	cg13434852	0.829179	-13.3974	13.3974	0.0457358	-0.032482	10324.2	22	0.127545	0.861661	0	1	10739.8	22	0.0346797	DOCK1	GeneID:1793	DOCK180;	NM_001380.2
7127	cg07126559	0.822071	-13.3828	13.3828	0.0458903	-0.0332444	8198.32	22	0.102603	0.855315	0	1	8690.79	22	0.0197415	SGCG	GeneID:6445	A4; MAM; DMDA; SCG3; TYPE; DAGA4; DMDA1; LGMD2C; SCARMD2; MGC130048;	NM_000231.1
12500	cg12572545	0.0710114	-13.3828	13.3828	0.0458903	-0.0294669	8421.71	22	0.0544814	0.100478	0	1	9281.39	22	0.118244	SC4MOL	GeneID:6307	DESP4; ERG25;	NM_006745.3
18027	cg18008766	0.114582	13.3569	13.3569	0.0461651	0.0310833	10755.9	22	0.108186	0.0834982	0	1	10887.9	22	0.0212381	SFRS7	GeneID:6432	9G8; AAG3; HSSG1; RBM37; ZCRB2; ZCCHC20;	NM_001031684.1
11160	cg11233153	0.0339597	-13.3049	13.3049	0.0467203	-0.0241842	12515	22	0.0119173	0.058144	0	1	13018.9	22	0.105193	SLC10A3	GeneID:8273	P3; DXS253E;	NM_019848.2
8314	cg08365982	0.881981	-13.3036	13.3036	0.0467352	-0.0261632	12713.6	22	0.120503	0.908144	0	1	11895	22	0.0214527	CAV3	GeneID:859	VIP21; LGMD1C; VIP-21; MGC126100; MGC126101; MGC126129;	NM_001234.3
10040	cg10125195	0.802767	-13.2989	13.2989	0.0467856	-0.0351889	13270.5	22	0.117293	0.837956	0	1	13946.1	22	0.0307617	LACRT	GeneID:90070	MGC71934;	NM_033277.1
11090	cg11170796	0.756383	-13.2989	13.2989	0.0467856	-0.0396764	6626.75	22	0.10902	0.79606	0	1	6918.51	22	0.0374493	TCF3	GeneID:6929	E2A; ITF1;	NM_003200.1
12625	cg12687463	0.69047	-13.2989	13.2989	0.0467856	-0.0450526	6345.02	22	0.144398	0.735522	0	1	6892.06	22	0.0372562	CFHR1	GeneID:3078	CFHL; FHR1; HFL1; CFHL1; H36-1; MGC104329;	NM_002113.1
23239	cg23264413	0.562231	-13.2989	13.2989	0.0467856	-0.051886	10357.2	22	0.172932	0.614117	0	1	10670.3	22	0.165802	PSG4	GeneID:5672	PSG9;	NM_002780.3
9443	cg09508556	0.88033	-13.253	13.253	0.0472826	-0.0263117	15038.5	22	0.0882127	0.906642	0	1	14435.3	22	0.0283832	PSORS1C2	GeneID:170680	SPR1; C6orf17;	NM_014069.1
10176	cg10248727	0.887495	-13.1738	13.1738	0.048153	-0.0253725	30989	22	0.0765178	0.912868	0	1	30413.9	22	0.0336615	LCN1	GeneID:3933	TP; PMFA; VEGP; MGC71975;	NM_002297.2
19050	cg19055231	0.0816061	13.1738	13.1738	0.048153	0.0270244	16706.8	22	0.0682213	0.0545817	0	1	16109.5	22	0.017377	STAC	GeneID:6769	STAC1;	NM_003149.1
628	cg00613255	0.838609	-13.1288	13.1288	0.0486543	-0.0311729	18914.8	22	0.140191	0.869782	0	1	18837.7	22	0.0420128	INS	GeneID:3630		NM_000207.1
1343	cg01333788	0.799486	-13.0842	13.0842	0.0491563	-0.0353395	11345.3	22	0.131195	0.834826	0	1	11839.6	22	0.0304385	GJB5	GeneID:2709	CX31.1;	NM_005268.2
8636	cg08693325	0.68645	-13.057	13.057	0.0494652	-0.0450658	3616.17	22	0.139083	0.731516	0	1	3756.27	22	0.0695188	LUZP4	GeneID:51213	CT-8; CT28; HOM-TES-85;	NM_016383.2
17715	cg17706173	0.838008	-13.0364	13.0364	0.0497008	-0.0311675	10876.3	22	0.116188	0.869175	0	1	11014.6	22	0.0389227	C16orf30	GeneID:79652	CLP24; FLJ20898;	NM_024600.1
3931	cg03887787	0.304407	13.0138	13.0138	0.0499596	0.0473001	12842.1	22	0.131651	0.257107	0	1	12555.3	22	0.0683061	CTSW	GeneID:1521	LYPN;	NM_001335.2
