# Supplementary material for: Phenotypic Subtyping and Re-Analysis of Existing Methylation Data from Autistic Probands in Simplex Families Reveal ASD Subtype-Associated Differentially Methylated Genes and Biological Functions
Source: Int J Mol Sci. 2020 Sep 19;21(18):6877. doi: 10.3390/ijms21186877 (PMC7555936; doi:10.3390/ijms21186877)
Supplement: Supplementary file 1 [file ijms-21-06877-s001.zip › ijms-927106-supplementary/Suppl. Materials_revised MS/Table S2. Significant DAGs in intermediate subgroup.xlsx]

## Sheet: Sheet1
		Patients								Siblings
Index	TargetID	P. AVG_Beta	P. DiffScore	|P. DiffScore|	p-value	P. Delta Beta	P. Intensity	P. N-ARRAYS	P. ARRAY_ STDEV	S. AVG_Beta	S. DiffScore	S. Delta Beta	S. Intensity	S. N-ARRAYS	S. ARRAY_ STDEV	SYMBOL	GENE_ID	SYNONYM	ACCESSION
17927	cg17901463	0.171333	-119.691	119.691	1.07377e-12	-0.0417854	7290.43	121	0.161684	0.213118	0	1	5395.19	121	0.158101	GSTM1	GeneID:2944	MU; H-B; GST1; GTH4; GTM1; MU-1; GSTM1-1; MGC26563; GSTM1a-1a; GSTM1b-1b;	NM_000561.2
25573	cg25569462	0.708676	98.4193	98.4193	1.43903e-10	0.0440885	3928.07	121	0.193612	0.664587	0	1	3815.87	121	0.240363	FLJ25801	GeneID:205860		NM_173553.1
7307	cg07327347	0.785597	80.7554	80.7554	8.40355e-09	0.0351101	12062	121	0.206439	0.750487	0	1	12093	121	0.233606	AQP8	GeneID:343		NM_001169.2
19705	cg19728223	0.137084	-79.2106	79.2106	1.19933e-08	-0.0317543	23427.7	121	0.0955227	0.168839	0	1	24465.1	121	0.0983597	KCNQ1	GeneID:3784	LQT; RWS; WRS; LQT1; ATFB1; KCNA8; KCNA9; Kv1.9; Kv7.1; KVLQT1;	NT_009237.17
26262	cg26267310	0.0952115	-74.325	74.325	3.69399e-08	-0.0268053	16547.5	121	0.146425	0.122017	0	1	16871.3	121	0.166172	DHRS10	GeneID:51171	retSDR3;	NM_016246.2
17692	cg17687883	0.134171	60.4948	60.4948	8.92308e-07	0.0259844	5274.17	121	0.147393	0.108186	0	1	6038.67	121	0.128357	MTHFD2	GeneID:10797	NMDMC;	NM_006636.2
13675	cg13733733	0.752967	60.3635	60.3635	9.19708e-07	0.0332888	7664.82	121	0.153115	0.719678	0	1	7625.82	121	0.192374	LILRA3	GeneID:11026	e3; HM31; HM43; ILT6; LIR4; CD85E; LIR-4;	NM_006865.2
5736	cg05740244	0.740131	53.9385	53.9385	4.03789e-06	0.0327039	3736.31	121	0.151259	0.707427	0	1	3865.74	121	0.196514	LDHC	GeneID:3948	LDH3; LDHX; MGC111073;	NM_017448.1
16049	cg15974053	0.0613554	-46.8288	46.8288	2.07549e-05	-0.0193535	22843	121	0.11946	0.0807089	0	1	23054.6	121	0.139626	DHRS10	GeneID:51171	retSDR3;	NM_016246.2
8581	cg08634464	0.228259	46.1174	46.1174	2.44489e-05	0.0298551	2100.63	121	0.130185	0.198404	0	1	2720.45	121	0.133748	LOC126295	GeneID:126295		NM_173480.1
12089	cg12133004	0.815261	46.0572	46.0572	2.479e-05	0.0258389	4161.54	121	0.0910923	0.789423	0	1	4234.55	121	0.126319	C12orf54	GeneID:121273	HSD-29; HSD-30; MGC35033;	NM_152319.2
21429	cg21450627	0.837641	45.1865	45.1865	3.02935e-05	0.0238282	23209.1	121	0.0707696	0.813813	0	1	23454.4	121	0.117163	PSD4	GeneID:23550	TIC; EFA6B;	NM_012455.2
22611	cg22642718	0.939325	45.1865	45.1865	3.02935e-05	0.0144485	25861.8	121	0.0583186	0.924877	0	1	26129.5	121	0.0937099	KCNJ12	GeneID:3768	IRK2; hIRK; KCNJN1; Kir2.2; Kir2.2v; kcnj12x; hkir2.2x;	NM_021012.3
7714	cg07747299	0.224776	-44.9783	44.9783	3.17809e-05	-0.0307344	10024.3	121	0.175628	0.25551	0	1	10177.5	121	0.195247	C21orf56	GeneID:84221	MGC99490; DKFZp434N0650;	NM_032261.3
16160	cg16080552	0.389077	-44.9783	44.9783	3.17809e-05	-0.0363718	5487.43	121	0.163265	0.425449	0	1	5572.6	121	0.157197	TACSTD2	GeneID:4070	M1S1; EGP-1; GA733; TROP2; GA733-1;	NM_002353.1
762	cg00729708	0.601655	42.1759	42.1759	6.05918e-05	0.0348882	10701.4	121	0.189475	0.566767	0	1	10239.2	121	0.175119	LASS3	GeneID:204219	MGC27091;	NM_178842.2
11429	cg11492040	0.938536	38.1965	38.1965	0.000151478	0.0135782	15823.6	121	0.0747807	0.924957	0	1	15688.3	121	0.109124	H19	GeneID:283120	ASM; BWS; ASM1; MGC4485; PRO2605; D11S813E;	NT_009237.17
21469	cg21489722	0.854093	38.1965	38.1965	0.000151478	0.021055	13783.5	121	0.19419	0.833038	0	1	13583.3	121	0.221945	FAM9B	GeneID:171483	FLJ40182;	NM_205849.1
26484	cg26521448	0.877081	38.1965	38.1965	0.000151478	0.0191951	19766.1	121	0.218302	0.857886	0	1	19672.5	121	0.247758	ZC3H7A	GeneID:29066	ZC3H7; HSPC055; ZC3HDC7; FLJ10027; FLJ20318;	NM_014153.2
3423	cg03399459	0.784712	36.5596	36.5596	0.000220822	0.0254854	9237.41	121	0.14124	0.759226	0	1	9653.88	121	0.173926	ANXA8	GeneID:244	ANX8; ANXA8L2; FLJ32754; VAC beta;	NM_001630.1
26705	cg26750319	0.922793	36.5596	36.5596	0.000220822	0.0148566	14963.2	121	0.143082	0.907936	0	1	15034.4	121	0.166532	KCNQ1	GeneID:3784	LQT; RWS; WRS; LQT1; ATFB1; KCNA8; KCNA9; Kv1.9; Kv7.1; KVLQT1;	NT_009237.17
4871	cg04810997	0.720575	36.5207	36.5207	0.000222809	0.0289159	3869.45	121	0.205078	0.691659	0	1	4056.26	121	0.226212	TAS2R60	GeneID:338398	T2R56; T2R60; MGC119154; MGC119155;	NM_177437.1
13244	cg13315147	0.210902	-36.2435	36.2435	0.00023749	-0.0275947	11144.7	121	0.18827	0.238497	0	1	11129.6	121	0.186105	CYP2E1	GeneID:1571	CPE1; CYP2E; P450-J; P450C2E;	NM_000773.3
17848	cg17820828	0.560027	-35.6451	35.6451	0.000272579	-0.0328603	19137.4	121	0.127711	0.592887	0	1	19284.3	121	0.133909	KCNQ1	GeneID:3784	LQT; RWS; WRS; LQT1; ATFB1; KCNA8; KCNA9; Kv1.9; Kv7.1; KVLQT1;	NT_009237.17
17427	cg17399166	0.7564	34.9152	34.9152	0.000322465	0.0265878	15769.7	121	0.150236	0.729812	0	1	16008	121	0.204519	CD1D	GeneID:912		NM_001766.2
19581	cg19584957	0.928526	34.5017	34.5017	0.000354676	0.013932	24581.5	121	0.156902	0.914594	0	1	24644.8	121	0.177402	TTLL10	GeneID:254173	TTLL5; FLJ36119; FLJ42131; RP5-902P8.1;	NM_153254.1
21988	cg22022041	0.707098	33.0796	33.0796	0.00049208	0.0284492	11779.4	121	0.138407	0.678649	0	1	11970.8	121	0.174026	CCR9	GeneID:10803	GPR28; CDw199; GPR-9-6;	NM_031200.1
25579	cg25575065	0.0929221	-33.0316	33.0316	0.000497554	-0.0191738	10996.9	121	0.0497078	0.112096	0	1	10809.6	121	0.0681473	ARSA	GeneID:410	MLD;	NM_000487.3
12412	cg12485992	0.916111	32.476	32.476	0.000565452	0.0147172	17597.1	121	0.0549909	0.901393	0	1	17062.8	121	0.0925577	SPATA22	GeneID:84690	NYD-SP20;	NM_032598.2
5458	cg05444024	0.909595	32.4198	32.4198	0.000572818	0.0152435	13016.2	121	0.0830495	0.894351	0	1	12952.2	121	0.114457	FUT6	GeneID:2528	FT1A;	NM_000150.1
12149	cg12215675	0.863783	32.4198	32.4198	0.000572818	0.0189171	14701.3	121	0.156081	0.844866	0	1	14540.4	121	0.180911	TTLL2	GeneID:83887	C6orf104; NYD-TSPG; dJ366N23.3;	NM_031949.3
27450	cg27519424	0.109899	31.2424	31.2424	0.000751201	0.0186316	5717.3	121	0.106194	0.0912669	0	1	6140.81	121	0.0876666	HLCS	GeneID:3141	HCS;	NM_000411.4
1422	cg01413516	0.891437	29.6251	29.6251	0.00109016	0.0162623	20017.3	121	0.0797349	0.875175	0	1	20243.7	121	0.0998908	INSL3	GeneID:3640	RLF; RLNL; MGC119818; MGC119819;	NM_005543.2
10072	cg10157098	0.494018	29.2963	29.2963	0.0011759	0.0315476	20419.3	121	0.124794	0.46247	0	1	20578.6	121	0.119525	NYD-SP18	GeneID:84691		NM_032599.1
8589	cg08642068	0.525893	-29.2762	29.2762	0.00118134	-0.031127	4802.82	121	0.171633	0.55702	0	1	4809.36	121	0.156226	SPAG4L	GeneID:140732	TSARG4; MGC33594; dJ726C3.1;	NM_080675.3
22261	cg22289115	0.948998	29.056	29.056	0.0012428	0.0112307	22457.4	121	0.0302222	0.937767	0	1	22340.2	121	0.0753235	MUCDHL	GeneID:53841	MU-PCDH; FLJ20219;	NM_021924.2
25059	cg25081201	0.931185	29.056	29.056	0.0012428	0.0128189	25450.4	121	0.0750835	0.918366	0	1	25073.4	121	0.105599	FXYD4	GeneID:53828	CHIF;	NM_173160.2
24394	cg24443136	0.890885	29.0062	29.0062	0.00125714	0.0161073	13264.3	121	0.184144	0.874778	0	1	13048.2	121	0.205319	ATP2B3	GeneID:492	PMCA3;	NM_021949.2
15319	cg15317267	0.915339	26.133	26.133	0.00243615	0.0137032	18724.9	121	0.0626151	0.901636	0	1	18686.6	121	0.0958223	H19	GeneID:283120	ASM; BWS; ASM1; MGC4485; PRO2605; D11S813E;	NR_002196.1
11226	cg11291200	0.932904	25.9703	25.9703	0.00252909	0.0122172	16081.7	121	0.0509498	0.920687	0	1	15946.6	121	0.0826548	MAGEB2	GeneID:4113	DAM6; MGC26438; MAGE-XP-2;	NM_002364.3
18461	cg18450227	0.941021	25.8079	25.8079	0.00262551	0.0114942	17527	121	0.0736052	0.929527	0	1	17690.7	121	0.101056	MAPK4	GeneID:5596	ERK3; Erk4; PRKM4; p63MAPK;	NM_002747.2
20241	cg20281815	0.916804	25.3933	25.3933	0.00288846	0.0134299	13275.9	121	0.0994055	0.903374	0	1	13151.5	121	0.123946	PSCA	GeneID:8000	PRO232;	NM_005672.2
5910	cg05921324	0.806575	25.3428	25.3428	0.00292228	0.0210166	13124.2	121	0.188831	0.785559	0	1	12994.8	121	0.209118	APOA4	GeneID:337		NM_000482.3
8373	cg08424423	0.890953	25.3428	25.3428	0.00292228	0.0153926	11996.6	121	0.159671	0.87556	0	1	11751.9	121	0.179985	CDSN	GeneID:1041	S; HTSS; D6S586E;	NM_001264.3
27444	cg27513764	0.777839	24.8044	24.8044	0.00330795	0.0224347	3955.54	121	0.156774	0.755404	0	1	4042.11	121	0.195094	EFCAB3	GeneID:146779	FLJ25818; MGC126801; MGC126827;	NM_173503.1
6926	cg06940107	0.801975	24.6509	24.6509	0.00342695	0.0210595	6011.43	121	0.13894	0.780916	0	1	6200.57	121	0.194251	C21orf100	GeneID:118421	MGC125397; MGC125398; MGC125399; MGC125400;	NM_145033.1
7416	cg07443748	0.793516	24.6179	24.6179	0.00345313	0.021481	11983	121	0.194472	0.772035	0	1	11848.2	121	0.217391	CESK1	GeneID:150160		NM_014406.4
8379	cg08431931	0.299476	24.6179	24.6179	0.00345313	0.0264197	7624.32	121	0.115482	0.273057	0	1	7372.91	121	0.104604	MGC26816	GeneID:164684		NM_152613.1
21578	cg21591452	0.936908	24.4221	24.4221	0.00361235	0.0115651	21356.9	121	0.0911063	0.925343	0	1	21393.1	121	0.115305	TMEM105	GeneID:284186	FLJ38792;	NM_178520.2
16554	cg16483466	0.809292	24.3105	24.3105	0.00370641	0.0204788	16584.1	121	0.181752	0.788813	0	1	16356.9	121	0.201714	C20orf186	GeneID:149954	RY2G5; LPLUNC4; dJ726C3.5;	NM_182519.1
14136	cg14162076	0.870319	24.279	24.279	0.00373334	0.0165768	17813	121	0.172046	0.853742	0	1	17841.8	121	0.192564	CLEC4D	GeneID:338339	MCL; Mpcl; CLEC-6; CLECSF8; MGC40078;	NM_080387.4
17809	cg17788013	0.752421	23.5623	23.5623	0.00440324	0.0232143	4089.46	121	0.150453	0.729207	0	1	4167.54	121	0.204384	SPINK5	GeneID:11005	LEKTI; LETKI; VAKTI;	NM_006846.2
6859	cg06862644	0.862453	23.4603	23.4603	0.00450782	0.0169256	14038.4	121	0.158665	0.845527	0	1	14079	121	0.176278	SPATA22	GeneID:84690	NYD-SP20;	NM_032598.2
5803	cg05810550	0.771314	23.3614	23.3614	0.00461171	0.0222099	5212.69	121	0.149154	0.749104	0	1	5296.63	121	0.173275	DEFB106A	GeneID:245909	BD-6; DEFB-6; DEFB106; MGC118938; MGC118939; MGC118940; MGC118941;	NM_152251.2
23716	cg23753610	0.926374	23.2699	23.2699	0.00470984	0.0121893	13182.8	121	0.119475	0.914185	0	1	13047.9	121	0.138622	DNAHL1	GeneID:284176	FLJ40457;	NM_173628.1
24161	cg24216701	0.943655	23.2699	23.2699	0.00470984	0.0107856	15834.5	121	0.0509025	0.932869	0	1	15799.7	121	0.0829369	CDX1	GeneID:1044		NM_001804.1
22942	cg22980351	0.337467	-22.8493	22.8493	0.00518888	-0.0274575	8496.95	121	0.138235	0.364925	0	1	8419.46	121	0.146489	WDR40B	GeneID:139170	KIAA1892L;	NM_178470.3
27539	cg27622610	0.773782	22.7537	22.7537	0.00530435	0.0218533	6305.53	121	0.189458	0.751929	0	1	6561.25	121	0.21427	OR1G1	GeneID:8390	OR1G2; OR17-130; OR17-209;	NM_003555.1
25416	cg25426302	0.814425	22.6204	22.6204	0.00546967	0.0196299	7237.68	121	0.162217	0.794795	0	1	7267.64	121	0.182532	PRRT1	GeneID:80863	NG5; C6orf31;	NM_030651.2
4463	cg04435377	0.934273	22.3462	22.3462	0.00582619	0.0113425	16266	121	0.0755632	0.92293	0	1	16025.8	121	0.103121	FLJ31568	GeneID:150244		NM_152509.1
4776	cg04727522	0.602127	22.3462	22.3462	0.00582619	0.0275475	11024	121	0.15404	0.574579	0	1	10849.3	121	0.163424	C18orf22	GeneID:79863	HsT169; FLJ21172;	NM_024805.1
8220	cg08268099	0.779169	22.3462	22.3462	0.00582619	0.0213261	8964.98	121	0.153872	0.757843	0	1	8964.54	121	0.210427	OLFM1	GeneID:10439	AMY; NOE1; OlfA; NOELIN; NOELIN1; NOELIN1_V1; NOELIN1_V2; NOELIN1_V4;	NM_014279.2
8308	cg08356693	0.658485	22.3462	22.3462	0.00582619	0.0261179	2235.74	121	0.120662	0.632368	0	1	2314.78	121	0.166889	ITLN1	GeneID:55600	LFR; HL-1; ITLN; hIntL; omentin; FLJ20022;	NM_017625.2
9145	cg09205751	0.894496	22.3462	22.3462	0.00582619	0.0143092	25456.3	121	0.0485427	0.880187	0	1	25194.4	121	0.0777474	NALP6	GeneID:171389	PYPAF5;	NM_138329.1
14162	cg14182690	0.726674	22.3462	22.3462	0.00582619	0.0237634	7877.24	121	0.152158	0.70291	0	1	7879.09	121	0.160983	RUNX3	GeneID:864	AML2; CBFA3; PEBP2aC;	NM_004350.1
21564	cg21575929	0.932656	22.3462	22.3462	0.00582619	0.0114658	22007	121	0.0540547	0.92119	0	1	21930.8	121	0.0842509	ADRA1B	GeneID:147	ADRA1; ALPHA1BAR;	NM_000679.3
21623	cg21627181	0.816	22.3462	22.3462	0.00582619	0.0193339	7057.98	121	0.190752	0.796666	0	1	7155.71	121	0.215047	SLC17A4	GeneID:10050	KAIA2138; MGC129623;	NM_005495.1
24560	cg24607535	0.763823	22.3462	22.3462	0.00582619	0.0220881	3096.91	121	0.15386	0.741735	0	1	3111.39	121	0.176498	CDH26	GeneID:60437	VR20;	NM_177980.1
20134	cg20158826	0.782896	22.2894	22.2894	0.00590288	0.0210857	20057.1	121	0.160011	0.76181	0	1	20146.5	121	0.183822	CCS	GeneID:9973		NM_005125.1
22590	cg22627427	0.861865	22.2401	22.2401	0.00597016	0.0164857	8774.22	121	0.169808	0.845379	0	1	8720.77	121	0.19174	C11orf9	GeneID:745	KIAA0954; MGC10781; BC269730_4;	NM_013279.1
6684	cg06690548	0.911991	22.0099	22.0099	0.00629516	0.0129392	11783.5	121	0.0494773	0.899052	0	1	11668	121	0.0736486	SLC7A11	GeneID:23657	xCT; CCBR1;	NM_014331.2
15993	cg15916061	0.808611	21.9942	21.9942	0.00631796	0.0196065	12926.2	121	0.199891	0.789004	0	1	13093.8	121	0.224845	SLC17A4	GeneID:10050	KAIA2138; MGC129623;	NM_005495.1
3719	cg03704031	0.0977627	-21.8254	21.8254	0.00656842	-0.016615	10629.5	121	0.119772	0.114378	0	1	10450.1	121	0.168059	INGX	GeneID:27160	ING2; ING1-like; MGC119770; MGC119771;	NR_002226.1
17709	cg17703324	0.847949	21.7577	21.7577	0.0066716	0.0172218	6837.16	121	0.17624	0.830727	0	1	6847.01	121	0.200694	OPTC	GeneID:26254	OPT;	NM_014359.3
10161	cg10237469	0.134241	21.7231	21.7231	0.00672492	0.0177284	26223.4	121	0.0819453	0.116513	0	1	25417.6	121	0.0727708	CEACAM4	GeneID:1089	NCA; CGM7; CGM7_HUMAN;	NM_001817.2
13172	cg13259290	0.791009	21.7231	21.7231	0.00672492	0.0204222	15433	121	0.200348	0.770587	0	1	15234.3	121	0.224242	CSF2	GeneID:1437	GMCSF; MGC131935;	NM_000758.2
18043	cg18023724	0.813594	21.098	21.098	0.00776603	0.0190222	9703.54	121	0.0400593	0.794571	0	1	9724.23	121	0.0636908	LOC92345	GeneID:92345		NM_138386.1
19385	cg19394737	0.954467	21.098	21.098	0.00776603	0.00945169	23147.6	121	0.0432114	0.945016	0	1	22815.9	121	0.0756722	DKFZp434O0527	GeneID:255101		NM_194302.1
24438	cg24477636	0.828479	21.098	21.098	0.00776603	0.0181875	5832.25	121	0.100677	0.810292	0	1	5862.59	121	0.135699	OR10H1	GeneID:26539		NM_013940.1
24967	cg24995836	0.143643	-21.0781	21.0781	0.00780168	-0.0190857	10886.8	121	0.14507	0.162729	0	1	11147.3	121	0.16062	GABRA3	GeneID:2556	MGC33793;	NM_000808.2
20437	cg20483763	0.975129	20.8366	20.8366	0.00824784	0.00770307	23766.9	121	0.028111	0.967426	0	1	23649.5	121	0.0632756	CABP4	GeneID:57010		NM_145200.2
13652	cg13705284	0.706647	20.5052	20.5052	0.00890182	0.0236841	4197.67	121	0.155358	0.682963	0	1	4211.76	121	0.179245	ACOX2	GeneID:8309	BCOX; BRCOX; THCCox; BRCACOX;	NM_003500.2
12418	cg12493160	0.884425	20.3569	20.3569	0.00921105	0.0144852	9918.01	121	0.0750414	0.86994	0	1	9987.49	121	0.102396	PRKACG	GeneID:5568	KAPG;	NM_002732.2
27080	cg27132814	0.751239	20.0793	20.0793	0.00981904	0.0217599	6809.31	121	0.159976	0.729479	0	1	6849.04	121	0.178036	C20orf79	GeneID:140856	HSD22; dJ1068E13.2;	NM_178483.2
2263	cg02237119	0.676427	-20.0699	20.0699	0.00984022	-0.0237349	19996.8	121	0.0781941	0.700161	0	1	19787.8	121	0.0789098	WBSCR27	GeneID:155368	MGC40131;	NM_152559.2
7757	cg07792737	0.952915	19.8013	19.8013	0.0104682	0.00937206	20973.5	121	0.0364356	0.943543	0	1	21518.1	121	0.075179	NPIP	GeneID:9284		NM_006985.1
3962	cg03923277	0.470526	19.6364	19.6364	0.0108734	0.0270511	39079.6	121	0.156471	0.443475	0	1	37819.9	121	0.184442	TDG	GeneID:6996		NM_001008411.1
4041	cg03993463	0.88415	19.6364	19.6364	0.0108734	0.0143253	14106.6	121	0.151946	0.869825	0	1	14437	121	0.181522	KCNJ15	GeneID:3772	KIR1.3; KIR4.2; MGC13584;	NM_002243.3
8125	cg08159444	0.470805	19.6364	19.6364	0.0108734	0.027056	4742.73	121	0.119697	0.443749	0	1	4975.29	121	0.103134	PNMA5	GeneID:114824	KIAA1934;	NM_052926.1
18830	cg18838701	0.272396	-19.6364	19.6364	0.0108734	-0.0240803	9254.07	121	0.125732	0.296477	0	1	9216.69	121	0.147065	TNNI3	GeneID:7137	CMH7; cTnI; TNNC1; MGC116817;	NM_000363.3
21592	cg21604856	0.726258	19.5158	19.5158	0.0111795	0.0225097	6541.58	121	0.156909	0.703748	0	1	6478.94	121	0.182153	SUHW1	GeneID:129025	ZNF280; ZNF636; 3 OY11.1;	NM_080740.3
24734	cg24775607	0.973961	19.5158	19.5158	0.0111795	0.0076133	34337.6	121	0.0105926	0.966348	0	1	33799.5	121	0.0737396	SSTR5	GeneID:6755		NM_001053.1
1695	cg01668126	0.802068	19.1361	19.1361	0.0122008	0.0189804	6068.13	121	0.148819	0.783088	0	1	6121.12	121	0.194212	MSR1	GeneID:4481	SR-A; CD204; phSR1; phSR2; SCARA1;	NM_002445.2
5763	cg05766474	0.907622	19.0592	19.0592	0.0124187	0.012562	14508.9	121	0.0962346	0.895061	0	1	14536.4	121	0.129651	CCL16	GeneID:6360	LEC; LMC; NCC4; CKb12; HCC-4; LCC-1; Mtn-1; NCC-4; SCYL4; ILINCK; SCYA16; MGC117051;	NM_004590.2
6141	cg06189133	0.889736	19.0592	19.0592	0.0124187	0.0137836	14861.6	121	0.0772159	0.875952	0	1	15114	121	0.106042	INSL3	GeneID:3640	RLF; RLNL; MGC119818; MGC119819;	NM_005543.2
21376	cg21400896	0.708144	18.9728	18.9728	0.0126682	0.0229607	11869.1	121	0.178594	0.685183	0	1	11853.3	121	0.199166	ABI3	GeneID:51225	NESH; SSH3BP3;	NM_016428.2
3669	cg03649060	0.722713	18.9005	18.9005	0.0128811	0.0223868	8824.79	121	0.179211	0.700326	0	1	8981.52	121	0.198408	ELOF1	GeneID:84337	MGC4549;	NM_032377.2
12295	cg12376406	0.698291	18.9005	18.9005	0.0128811	0.0232499	6467.75	121	0.176947	0.675041	0	1	6501.83	121	0.199477	FAM12B	GeneID:64184	EP3B; HE3B; HE3-BETA;	NM_022360.3
1918	cg01897036	0.869631	18.8944	18.8944	0.0128991	0.0149599	6057.43	121	0.114487	0.854671	0	1	6071.12	121	0.13432	SCTR	GeneID:6344	SR;	NM_002980.1
4770	cg04721098	0.746088	18.8944	18.8944	0.0128991	0.0213549	7065.16	121	0.146935	0.724733	0	1	7289.22	121	0.196584	CACNG3	GeneID:10368	Cacng2;	NM_006539.2
9195	cg09256683	0.755577	18.8944	18.8944	0.0128991	0.0209866	3614.73	121	0.165751	0.734591	0	1	3676.83	121	0.190586	CCL14	GeneID:6358	CC-1; CC-3; CKb1; MCIF; NCC2; SY14; HCC-1; HCC-3; NCC-2; SCYL2; SCYA14;	NM_032962.2
9652	cg09722555	0.869416	18.8944	18.8944	0.0128991	0.0150067	15085.3	121	0.158699	0.854409	0	1	15197.2	121	0.180059	CCL27	GeneID:10850	ALP; ILC; CTAK; CTACK; PESKY; ESKINE; SCYA27;	NM_006664.2
10220	cg10296238	0.397288	-18.8944	18.8944	0.0128991	-0.0262925	4731.29	121	0.190105	0.423581	0	1	4851.99	121	0.194321	C21orf56	GeneID:84221	MGC99490; DKFZp434N0650;	NM_032261.3
15128	cg15129294	0.639666	18.8944	18.8944	0.0128991	0.0248799	2430.73	121	0.146453	0.614786	0	1	2437.72	121	0.171085	CCL4L2	GeneID:388372	CCL4L; SCYA4L; AT744.2;	NM_207007.2
18249	cg18241160	0.171244	18.8944	18.8944	0.0128991	0.0187546	12347.6	121	0.236297	0.152489	0	1	12035.9	121	0.228165	CDC2L2	GeneID:985	CDC2L3; p58GTA; PITSLRE; CDK11-p46; CDK11-p58; MGC131975; CDK11-p110;	NM_033527.1
19379	cg19391527	0.662543	18.8944	18.8944	0.0128991	0.0242344	7085.88	121	0.157032	0.638308	0	1	7117.75	121	0.177084	PNOC	GeneID:5368	PPNOC;	NM_006228.2
7686	cg07711097	0.892785	18.7363	18.7363	0.0133772	0.0134214	13353.9	121	0.0898549	0.879364	0	1	13577.8	121	0.125581	GML	GeneID:2765	LY6DL;	NM_002066.1
12261	cg12339802	0.0819242	18.6961	18.6961	0.0135017	0.0137485	8939.8	121	0.0461591	0.0681757	0	1	8963.13	121	0.0449324	C1orf109	GeneID:54955	FLJ20508;	NM_017850.1
14229	cg14256699	0.927065	18.6778	18.6778	0.0135589	0.0110258	13478.5	121	0.0868991	0.91604	0	1	13536.3	121	0.115465	SOST	GeneID:50964	VBCH;	NM_025237.2
5011	cg04968426	0.883695	18.6298	18.6298	0.0137093	0.0139665	9469.1	121	0.137112	0.869728	0	1	9382.76	121	0.156527	PPP1R14D	GeneID:54866	GBPI-1; FLJ20251; MGC119014; MGC119016; CPI17-like;	NM_017726.6
15465	cg15464148	0.746846	18.6298	18.6298	0.0137093	0.0211891	13585.9	121	0.186422	0.725657	0	1	13262.9	121	0.206179	GPR92	GeneID:57121	GPR93; KPG_010;	NM_020400.4
21936	cg21964481	0.885349	18.5307	18.5307	0.014026	0.0138318	17230.9	121	0.132974	0.871517	0	1	17277.7	121	0.153766	SLC34A3	GeneID:142680	HHRH; NPTIIc; FLJ38680;	NM_080877.1
6577	cg06589885	0.89897	18.5205	18.5205	0.0140587	0.0129268	12866.3	121	0.0846024	0.886043	0	1	13051.6	121	0.116535	HFE2	GeneID:148738	JH; HJV; RGMC; HFE2A; MGC23953;	NM_145277.3
5217	cg05190718	0.776669	18.4915	18.4915	0.0141532	0.0198151	7380.58	121	0.194127	0.756854	0	1	7497.43	121	0.218967	CASQ2	GeneID:845	PDIB2;	NM_001232.1
4856	cg04797496	0.774863	18.3468	18.3468	0.0146325	0.0198478	6966.87	121	0.195829	0.755015	0	1	7101.9	121	0.22116	PCDH12	GeneID:51294	VECAD2; VE-cadherin-2;	NM_016580.2
21629	cg21633698	0.8493	18.3339	18.3339	0.0146762	0.015972	12040.3	121	0.201879	0.833328	0	1	12071.2	121	0.224892	THY1	GeneID:7070	CD90;	NM_006288.2
3804	cg03776850	0.955253	18.2685	18.2685	0.0148986	0.00883383	27548.2	121	0.0278486	0.946419	0	1	27271.9	121	0.0743599	TPSD1	GeneID:23430	MCP7L1; MMCP-7L; MGC95428;	NM_012217.2
3580	cg03557698	0.950113	18.1892	18.1892	0.0151734	0.00920391	13710.8	121	0.0479608	0.940909	0	1	13839.1	121	0.0782314	C1orf177	GeneID:163747	FLJ40201;	NM_152607.1
26892	cg26924825	0.823843	18.1892	18.1892	0.0151734	0.0173355	9302.11	121	0.13587	0.806508	0	1	9268.44	121	0.154539	LCAT	GeneID:3931		NM_000229.1
19545	cg19553721	0.807734	18.1677	18.1677	0.0152487	0.0181635	14986	121	0.0993454	0.789571	0	1	15339.2	121	0.123086	FAM106A	GeneID:80039	FLJ11800;	NM_024974.1
2308	cg02274362	0.924221	18.1344	18.1344	0.0153661	0.0110487	18539.3	121	0.0727395	0.913172	0	1	18698.5	121	0.095831	PNMA6A	GeneID:84968	MGC15827;	NM_032882.2
7125	cg07125166	0.822843	18.1344	18.1344	0.0153661	0.0173252	9833.88	121	0.16406	0.805518	0	1	9966.03	121	0.183449	FBXW12	GeneID:285231	Fbw12; FBXO35; MGC120385; MGC120386; MGC120387;	NM_207102.1
15111	cg15113803	0.842983	18.1344	18.1344	0.0153661	0.0162081	16306.2	121	0.186341	0.826775	0	1	16595.3	121	0.202309	RHO	GeneID:6010	RP4; OPN2;	NM_000539.2
20132	cg20154346	0.799327	18.1344	18.1344	0.0153661	0.0185313	6727.24	121	0.190737	0.780796	0	1	6907.07	121	0.215178	RAI2	GeneID:10742		NM_021785.2
21870	cg21902327	0.786235	18.1344	18.1344	0.0153661	0.019174	17468.2	121	0.173124	0.767061	0	1	17328.1	121	0.192483	FGF6	GeneID:2251	HST2; HBGF-6;	NM_020996.1
21943	cg21970438	0.855465	18.1344	18.1344	0.0153661	0.0154906	8545.39	121	0.154771	0.839974	0	1	8545.01	121	0.180661	TTLL2	GeneID:83887	C6orf104; NYD-TSPG; dJ366N23.3;	NM_031949.3
4051	cg04001668	0.946428	18.0723	18.0723	0.0155872	0.00942606	18390.5	121	0.0323187	0.937002	0	1	18362.3	121	0.0713072	GPR56	GeneID:9289	BFPP; TM7LN4; TM7XN1;	NM_201525.1
10173	cg10246520	0.914294	18.0435	18.0435	0.0156911	0.0117108	9317.61	121	0.0740646	0.902583	0	1	9445.04	121	0.0970488	OLFM4	GeneID:10562	GC1; OlfD; GW112; KIAA4294; bA209J19.1;	NM_006418.3
4977	cg04929865	0.784095	18.0096	18.0096	0.0158139	0.0191743	12341.9	121	0.167145	0.76492	0	1	12296.1	121	0.189529	BGN	GeneID:633	PGI; DSPG1; PG-S1; SLRR1A;	NM_001711.3
23544	cg23595927	0.811907	18.0096	18.0096	0.0158139	0.0178165	6872.25	121	0.176269	0.794091	0	1	6945.55	121	0.197172	MYL5	GeneID:4636		NM_002477.1
23735	cg23773532	0.823575	18.0096	18.0096	0.0158139	0.0172155	10389.6	121	0.196556	0.80636	0	1	10689.6	121	0.220756	GPRC5D	GeneID:55507		NM_018654.1
10329	cg10409560	0.795934	17.7292	17.7292	0.0168688	0.0185274	7146.38	121	0.185141	0.777407	0	1	7272.94	121	0.213913	FLJ23657	GeneID:152816		NM_178497.2
1160	cg01144251	0.761518	17.6347	17.6347	0.0172397	0.0200588	12627.9	121	0.178719	0.741459	0	1	12606.8	121	0.201176	KLK9	GeneID:284366	KLK8; KLKL3; KLK-L3;	NM_012315.1
27295	cg27360098	0.186477	17.5804	17.5804	0.0174564	0.0188423	20581.1	121	0.089285	0.167634	0	1	19900.3	121	0.0654033	ELN	GeneID:2006	WS; WBS; SVAS; elastin;	NM_000501.1
20238	cg20277670	0.94945	17.5727	17.5727	0.0174874	0.0090996	17411.2	121	0.0373183	0.94035	0	1	17383.2	121	0.0703017	HRH2	GeneID:3274	H2R;	NM_022304.1
18459	cg18448480	0.769405	17.5594	17.5594	0.0175412	0.0196684	14714.3	121	0.053849	0.749737	0	1	15225.5	121	0.0628601	FLJ35785	GeneID:283796		XR_001517.1
1700	cg01671881	0.774707	17.4927	17.4927	0.0178129	0.019406	6604.22	121	0.179246	0.755301	0	1	6840.27	121	0.208251	C20orf71	GeneID:128861	SPLUNC3; MGC44525;	NM_178466.2
13285	cg13350783	0.824133	17.3934	17.3934	0.0182249	0.016967	13341.8	121	0.184376	0.807166	0	1	13362.1	121	0.208963	KRT13	GeneID:3860	K13; CK13; MGC3781;	NM_002274.2
16239	cg16175725	0.913133	17.3035	17.3035	0.0186059	0.0116037	8607.66	121	0.0637485	0.90153	0	1	8681.28	121	0.0980396	TCF1	GeneID:6927	HNF1; LFB1; HNF1A; MODY3;	NM_000545.3
18714	cg18705776	0.75577	17.3005	17.3005	0.0186186	0.0201386	10096.3	121	0.186731	0.735631	0	1	10083.8	121	0.208328	CALML3	GeneID:810	CLP;	NM_005185.2
11204	cg11267879	0.749994	17.2886	17.2886	0.0186697	0.0203584	3706.48	121	0.168147	0.729635	0	1	3714.93	121	0.196647	CYP2F1	GeneID:1572	C2F1; CYP2F; MGC126121;	NM_000774.3
17710	cg17703554	0.804363	17.2886	17.2886	0.0186697	0.0179158	4005.14	121	0.147199	0.786447	0	1	4074.37	121	0.163533	WDR21C	GeneID:138009	FLJ35775;	NM_152418.2
11703	cg11761535	0.79018	17.261	17.261	0.0187889	0.0185821	6286.81	121	0.168604	0.771598	0	1	6390.69	121	0.202533	TM4SF18	GeneID:116441	L6D;	NM_138786.1
3117	cg03099771	0.537074	17.2507	17.2507	0.0188337	0.0253437	7018.01	121	0.108316	0.511731	0	1	6915.39	121	0.1154	PRSS16	GeneID:10279	TSSP;	NM_005865.2
18093	cg18085435	0.753248	17.2381	17.2381	0.0188882	0.0201792	4927.53	121	0.164926	0.733069	0	1	4979.44	121	0.187289	ATP8B1	GeneID:5205	BRIC; FIC1; PFIC; ATPIC; PFIC1;	NM_005603.2
22006	cg22038738	0.859934	17.2183	17.2183	0.0189746	0.0148841	23214.3	121	0.158484	0.845049	0	1	23559.4	121	0.175401	PLAT	GeneID:5327	TPA; T-PA; DKFZp686I03148;	NM_000930.2
16722	cg16666160	0.961282	17.2065	17.2065	0.0190262	0.00811714	20975.2	121	0.0314827	0.953165	0	1	21001.9	121	0.0681577	NR5A1	GeneID:2516	ELP; SF1; FTZ1; SF-1; AD4BP; FTZF1;	NM_004959.3
19850	cg19859270	0.818061	17.2065	17.2065	0.0190262	0.0171569	5874.86	121	0.199843	0.800904	0	1	6086.23	121	0.230958	GPR15	GeneID:2838	MGC126828; MGC126830;	NM_005290.1
20454	cg20500126	0.822289	17.2065	17.2065	0.0190262	0.0169379	4714.02	121	0.163282	0.805351	0	1	4720.83	121	0.182912	ITGAE	GeneID:3682	CD103; HUMINAE;	NM_002208.3
247	cg00226923	0.807073	17.1183	17.1183	0.0194162	0.0176305	25574	121	0.211129	0.789442	0	1	25386.6	121	0.235874	FGD2	GeneID:221472	ZFYVE4; MGC71330;	NM_173558.2
11082	cg11161417	0.725912	17.1183	17.1183	0.0194162	0.0211132	9126.93	121	0.17406	0.704798	0	1	9181.84	121	0.19688	SPACA3	GeneID:124912	LYC3; LYZL3; SLLP1; ALLP17; MGC119058; 1700025M08Rik;	NM_173847.2
20975	cg21022395	0.706823	17.1183	17.1183	0.0194162	0.0217994	3262.49	121	0.153236	0.685024	0	1	3352.15	121	0.181198	SHOC2	GeneID:8036	SOC2; SUR8; SOC-2; SUR-8; KIAA0862; SIAA0862;	NM_007373.2
21582	cg21596858	0.826123	17.1183	17.1183	0.0194162	0.0166715	9874.29	121	0.0988201	0.809452	0	1	9830.64	121	0.116121	DCST2	GeneID:127579	FLJ32934; RP11-307C12.4;	NM_144622.1
23728	cg23767977	0.863629	17.1183	17.1183	0.0194162	0.0146115	14020.2	121	0.173063	0.849017	0	1	14117	121	0.194771	KRT6IRS	GeneID:112802	K6IRS1; KRT6IRS1; MGC119390; MGC119391;	NM_033448.1
23763	cg23815000	0.811359	17.1183	17.1183	0.0194162	0.0174524	11983.2	121	0.196116	0.793907	0	1	11743.9	121	0.219265	LCN1	GeneID:3933	TP; PMFA; VEGP; MGC71975;	NM_002297.2
26463	cg26502489	0.75424	17.1183	17.1183	0.0194162	0.0200145	3258.1	121	0.133628	0.734226	0	1	3351.09	121	0.158597	SCN2B	GeneID:6327		NM_004588.3
2877	cg02876062	0.870732	17.0357	17.0357	0.0197895	0.0141338	11783.9	121	0.181014	0.856599	0	1	11837.9	121	0.205726	FAM107B	GeneID:83641	C10orf45; FLJ45505; MGC11034; MGC90261;	NM_031453.2
8838	cg08878744	0.658663	17.0357	17.0357	0.0197895	0.0231001	8939.14	121	0.168094	0.635563	0	1	9056.57	121	0.191457	LCE1B	GeneID:353132	LEP2; SPRL2A;	NM_178349.1
11840	cg11884243	0.857766	17.0357	17.0357	0.0197895	0.0148974	15040.5	121	0.136044	0.842869	0	1	15275.9	121	0.155168	FCN2	GeneID:2220	P35; FCNL; EBP-37; ficolin-2;	NM_004108.2
18996	cg19000186	0.735658	17.0357	17.0357	0.0197895	0.0206815	8971.49	121	0.172272	0.714977	0	1	8982.86	121	0.190642	CNGA1	GeneID:1259	CNCG; CNG1; CNCG1; RCNC1; RCNCa; RCNCalpha;	NM_000087.2
25711	cg25734864	0.8645	17.0357	17.0357	0.0197895	0.014479	10900.2	121	0.0771705	0.850021	0	1	10628.3	121	0.09866	PROZ	GeneID:8858	PZ;	NM_003891.1
27277	cg27341860	0.908326	17.0357	17.0357	0.0197895	0.0117701	24881.3	121	0.103297	0.896555	0	1	25083.8	121	0.121856	OR2L13	GeneID:284521	OR2L14; MGC40047;	NM_175911.2
7562	cg07595943	0.953961	17.0341	17.0341	0.0197968	0.00858885	21133	121	0.0261789	0.945373	0	1	21121.7	121	0.0593452	LOC161931	GeneID:161931		NM_139174.2
7278	cg07297178	0.865897	16.9627	16.9627	0.0201248	0.0143697	11727	121	0.14509	0.851528	0	1	11843.6	121	0.163785	CEACAM7	GeneID:1087	CEA; CGM2;	NM_006890.1
424	cg00412805	0.903887	16.8417	16.8417	0.0206933	0.0120005	10540.6	121	0.0681036	0.891887	0	1	10441.4	121	0.0982213	KBTBD5	GeneID:131377	SRYP; FLJ32015; MGC125350;	NM_152393.2
13016	cg13088755	0.697764	16.8197	16.8197	0.0207986	0.0218325	3288.63	121	0.138589	0.675931	0	1	3335.21	121	0.164768	P2RY10	GeneID:27334	P2Y10;	NM_014499.2
14774	cg14774175	0.746117	16.8197	16.8197	0.0207986	0.0201343	6760.69	121	0.138412	0.725983	0	1	6798.03	121	0.181172	MAGEB3	GeneID:4114		NM_002365.3
16439	cg16359129	0.858414	16.8197	16.8197	0.0207986	0.0147306	7725.88	121	0.174688	0.843683	0	1	7838.27	121	0.195111	C1orf111	GeneID:284680	HSD20; RP11-565P22.3;	NM_182581.1
19413	cg19420968	0.907273	16.8197	16.8197	0.0207986	0.0117562	13022.2	121	0.0916797	0.895516	0	1	13192.3	121	0.11655	HCRTR1	GeneID:3061	OX1R;	NM_001525.1
19466	cg19465374	0.871686	16.8197	16.8197	0.0207986	0.013975	12333.9	121	0.130011	0.857711	0	1	12259.8	121	0.151232	AZGP1	GeneID:563	ZAG; ZA2G;	NM_001185.2
23615	cg23660082	0.758937	16.8197	16.8197	0.0207986	0.0196289	4943.47	121	0.0972652	0.739308	0	1	5003.02	121	0.144964	CST1	GeneID:1469		NM_001898.2
3683	cg03665605	0.840541	16.8121	16.8121	0.020835	0.0157124	6596.21	121	0.173778	0.824828	0	1	6620.21	121	0.200077	ATP5J2	GeneID:9551	ATP5JL;	NM_004889.2
18250	cg18241647	0.805014	16.8121	16.8121	0.020835	0.017525	10438.4	121	0.182363	0.787489	0	1	10699.9	121	0.204067	WFDC12	GeneID:128488	WAP2; SWAM2; C20orf122; dJ211D12.4;	NM_080869.1
20643	cg20688340	0.898317	16.8121	16.8121	0.020835	0.012309	16487.6	121	0.0428666	0.886008	0	1	16595.1	121	0.0758043	MMP21	GeneID:118856		NM_147191.1
13597	cg13656062	0.881352	16.7559	16.7559	0.0211061	0.0133457	10842.4	121	0.129088	0.868007	0	1	10735.1	121	0.144772	CYP4F2	GeneID:8529	CPF2;	NM_001082.3
4794	cg04740359	0.701428	16.7428	16.7428	0.0211699	0.0216445	3464.74	121	0.160453	0.679784	0	1	3566.33	121	0.184326	NTF3	GeneID:4908	NT3; HDNF; NGF2; NGF-2; MGC129711;	NM_002527.3
8556	cg08612871	0.78727	16.7428	16.7428	0.0211699	0.0183183	6818.91	121	0.188099	0.768952	0	1	6802.45	121	0.213591	GJB5	GeneID:2709	CX31.1;	NM_005268.2
6948	cg06954481	0.0648013	-16.7285	16.7285	0.0212399	-0.0127246	8718.2	121	0.0257512	0.0775259	0	1	8589.65	121	0.0469888	GBX2	GeneID:2637		NM_001485.2
10124	cg10207745	0.668283	16.7285	16.7285	0.0212399	0.0225741	6849.49	121	0.166468	0.645709	0	1	7041.44	121	0.188826	C12orf36	GeneID:283422	FLJ33810; MGC120140;	NM_182558.1
10844	cg10938286	0.887356	16.7285	16.7285	0.0212399	0.0129411	14012.4	121	0.102327	0.874415	0	1	14443.8	121	0.123492	CST2	GeneID:1470	MGC71924;	NM_001322.2
13435	cg13500819	0.559948	16.7285	16.7285	0.0212399	0.0245797	10980.6	121	0.140259	0.535369	0	1	11130.4	121	0.154721	PACAP	GeneID:51237	FLJ32987; MGC29506;	NM_016459.2
21693	cg21686987	0.808408	16.7285	16.7285	0.0212399	0.0173074	17708.2	121	0.190163	0.791101	0	1	17534.5	121	0.209013	CTRB1	GeneID:1504	CTRB; FLJ42412; MGC88037;	NM_001906.3
18157	cg18140857	0.88916	16.7268	16.7268	0.0212479	0.0128232	23456.4	121	0.09589	0.876336	0	1	23616.6	121	0.117485	RDHE2	GeneID:195814	RDH#2; RDH-E2; FLJ33105;	NM_138969.2
8862	cg08906015	0.752007	16.6944	16.6944	0.0214072	0.0197579	4879.55	121	0.154178	0.732249	0	1	5042.45	121	0.172206	MGC15476	GeneID:147906		NM_145056.1
7347	cg07364841	0.863631	16.6707	16.6707	0.0215243	0.0143111	8099.54	121	0.103636	0.84932	0	1	7963.43	121	0.115061	HGFAC	GeneID:3083	HGFA; MGC138395; MGC138397;	NM_001528.2
11711	cg11768416	0.968484	16.6707	16.6707	0.0215243	0.00739539	21000.6	121	0.0176848	0.961089	0	1	21040.1	121	0.0593839	C12orf12	GeneID:196477	MGC26598;	NM_152638.2
13482	cg13550608	0.862422	16.6707	16.6707	0.0215243	0.0143812	14015.5	121	0.155717	0.84804	0	1	13918.4	121	0.174096	SEMA3B	GeneID:7869	SemA; SEMA5; SEMAA; semaV; LUCA-1; FLJ34863;	NT_022517.17
23369	cg23401756	0.966307	16.6707	16.6707	0.0215243	0.00756258	25436.2	121	0.029125	0.958744	0	1	25388.4	121	0.0671843	DPEP3	GeneID:64180	MBD3;	NM_022357.1
11668	cg11721194	0.707746	16.5821	16.5821	0.0219678	0.0212811	6374.12	121	0.163349	0.686465	0	1	6482.96	121	0.187369	SLAMF7	GeneID:57823	19A; CS1; CD319; CRACC;	NM_021181.3
12264	cg12343082	0.883513	16.5821	16.5821	0.0219678	0.0131053	18221.5	121	0.125978	0.870407	0	1	18487.8	121	0.148415	CA5A	GeneID:763	CA5; CAV; CAVA;	NM_001739.1
13828	cg13877895	0.839999	16.5821	16.5821	0.0219678	0.0155753	7193.73	121	0.14365	0.824424	0	1	7217.33	121	0.159638	GKN1	GeneID:56287	FOV; CA11; AMP18; BRICD1; MGC70354; foveolin;	NM_019617.2
23980	cg24027679	0.861325	16.5821	16.5821	0.0219678	0.0143992	6111.56	121	0.143208	0.846926	0	1	6220.34	121	0.160109	SLC2A7	GeneID:155184	GLUT7;	NM_207420.1
1730	cg01708964	0.883105	16.5319	16.5319	0.0222234	0.0131068	11744.8	121	0.100132	0.869998	0	1	11825.7	121	0.123299	MYL7	GeneID:58498	MYL2A; MYLC2A;	NM_021223.2
15144	cg15149645	0.86886	16.4869	16.4869	0.0224551	0.013935	6116.92	121	0.129928	0.854925	0	1	6215.94	121	0.150318	P8	GeneID:26471	COM1;	NM_012385.1
9146	cg09207718	0.850775	16.4725	16.4725	0.0225292	0.0149487	13632.8	121	0.123731	0.835827	0	1	13717.4	121	0.13851	CYP1A2	GeneID:1544	CP12; P3-450; P450(PA);	NM_000761.3
19491	cg19504245	0.129964	-16.463	16.463	0.022579	-0.0162548	17560.7	121	0.0739786	0.146219	0	1	17237.7	121	0.091012	TNNT1	GeneID:7138	ANM;	NM_003283.3
19927	cg19944367	0.889751	16.463	16.463	0.022579	0.0126692	16190.7	121	0.0872846	0.877082	0	1	16304.3	121	0.110598	RGS3	GeneID:5998	C2PA; RGP3; FLJ20370; FLJ31516; FLJ90496; PDZ-RGS3;	NM_134427.1
24836	cg24870391	0.845009	16.463	16.463	0.022579	0.0152552	13844.3	121	0.188735	0.829753	0	1	14082.4	121	0.208324	CCL11	GeneID:6356	SCYA11; MGC22554;	NM_002986.2
5732	cg05731779	0.831895	16.4367	16.4367	0.022716	0.0159074	5476.74	121	0.100917	0.815988	0	1	5650.64	121	0.143235	MGC13034	GeneID:134288		NM_153217.1
8973	cg09027725	0.798203	16.4367	16.4367	0.022716	0.0175664	5570.25	121	0.161124	0.780636	0	1	5453.71	121	0.185437	COX4I2	GeneID:84701	COX4; COX4B; COX4-2; COX4L2; COXIV-2; dJ857M17.2;	NM_032609.2
20192	cg20226764	0.649844	16.4367	16.4367	0.022716	0.0227786	11937.5	121	0.142988	0.627065	0	1	12091.6	121	0.157106	MLN	GeneID:4295		NM_002418.1
24748	cg24789424	0.864655	16.4367	16.4367	0.022716	0.0141225	7911.73	121	0.149873	0.850533	0	1	7959.44	121	0.169442	BDH	GeneID:622	MGC2723; MGC4347; MGC9788;	NM_203315.1
26547	cg26583078	0.806444	16.4367	16.4367	0.022716	0.0171772	3178.4	121	0.122851	0.789267	0	1	3219.33	121	0.147849	SORBS2	GeneID:8470	ARGBP2; KIAA0777;	NM_021069.3
12366	cg12439899	0.104019	-16.4328	16.4328	0.0227363	-0.0148307	9896.38	121	0.191841	0.11885	0	1	9920.67	121	0.214419	TFAP2A	GeneID:7020	AP-2; AP2TF; TFAP2; AP-2alpha;	NM_003220.1
13850	cg13897449	0.703395	16.4328	16.4328	0.0227363	0.0212618	4073.92	121	0.151278	0.682133	0	1	4124.94	121	0.17653	PFKFB1	GeneID:5207	PFRX;	NM_002625.1
27279	cg27342801	0.795551	16.4328	16.4328	0.0227363	0.0176722	7569.36	121	0.176218	0.777879	0	1	7751.76	121	0.206985	REG3A	GeneID:5068	HIP; PAP; PAP1; REG3; INGAP; PAP-H; PBCGF; REG-III;	NM_138937.1
16188	cg16112945	0.725793	16.4021	16.4021	0.0228974	0.020491	8167.43	121	0.182701	0.705302	0	1	8184.42	121	0.204929	ADAMTS13	GeneID:11093	TTP; VWFCP; C9orf8; vWF-CP; MGC118899; MGC118900; DKFZp434C2322;	NM_139025.2
263	cg00239071	0.949825	16.3808	16.3808	0.0230101	0.00865686	23806.6	121	0.0281101	0.941168	0	1	23707.6	121	0.073483	C14orf68	GeneID:283600	HDMCP; HMFN1655;	NM_207117.2
5242	cg05221264	0.868769	16.3806	16.3806	0.0230112	0.0138435	12250.6	121	0.158662	0.854925	0	1	12365.1	121	0.179103	ELA2A	GeneID:63036	ELA1; PE-1;	NM_033440.1
6360	cg06388544	0.705543	16.3806	16.3806	0.0230112	0.0211458	4296.31	121	0.132314	0.684398	0	1	4023.73	121	0.152424	RHD	GeneID:6007	RH; Rh4; RH30; RHCE; RhII; RhPI; DIIIc; RHCED; RHDel; RHPII; Rh30a; RhDCw; CD240D; RHXIII; rhesus D; RHDVA(TT); RhK562-II;	NM_016124.3
18742	cg18740800	0.650866	16.3307	16.3307	0.0232772	0.0226492	2166.26	121	0.114209	0.628217	0	1	2266.32	121	0.158482	HSPCAL3	GeneID:3324		XM_934529.1
13168	cg13255629	0.822348	16.2683	16.2683	0.023614	0.0163032	8171.32	121	0.161355	0.806045	0	1	8387.95	121	0.192274	MEPE	GeneID:56955	OF45;	NM_020203.1
187	cg00174500	0.820318	16.2476	16.2476	0.0237269	0.0163793	10590.7	121	0.186129	0.803938	0	1	10686	121	0.211511	CMTM5	GeneID:116173	CKLFSF5; FLJ37521;	NM_138460.2
10779	cg10883352	0.913708	16.2476	16.2476	0.0237269	0.0110493	21990.5	121	0.069969	0.902658	0	1	22124.4	121	0.0925317		GeneID:5088
24236	cg24298280	0.663909	16.2476	16.2476	0.0237269	0.0222662	2939.41	121	0.152612	0.641643	0	1	3010.9	121	0.175521	IBRDC1	GeneID:154214	C6orf172; MGC26996; dJ84N20.1;	NM_152553.2
24888	cg24919884	0.818948	16.2476	16.2476	0.0237269	0.0164489	7436.92	121	0.199451	0.802499	0	1	7428.75	121	0.220616	ARHGEF16	GeneID:27237	NBR; GEF16;	NM_014448.2
5975	cg05985767	0.849331	16.2408	16.2408	0.0237638	0.0148639	7576.6	121	0.156589	0.834467	0	1	7496.45	121	0.176844	ANPEP	GeneID:290	CD13; LAP1; PEPN; gp150;	NM_001150.1
3059	cg03038672	0.841927	16.232	16.232	0.0238121	0.0152541	5459.63	121	0.116397	0.826673	0	1	5538.02	121	0.139872	CLDN9	GeneID:9080		NM_020982.2
14480	cg14473924	0.159297	-16.2203	16.2203	0.0238764	-0.0174951	8120.11	121	0.1067	0.176792	0	1	8200.18	121	0.126428	PDZRN3	GeneID:23024	LNX3; SEMACAP3;	NM_015009.1
6169	cg06210526	0.82422	16.1785	16.1785	0.0241075	0.0161346	8170.62	121	0.148193	0.808085	0	1	8410.5	121	0.163453	CYP2F1	GeneID:1572	C2F1; CYP2F; MGC126121;	NM_000774.3
6911	cg06917325	0.756524	16.1785	16.1785	0.0241075	0.0191792	9868.67	121	0.182912	0.737344	0	1	9883.4	121	0.208924	SLC22A8	GeneID:9376	OAT3; MGC24086;	NM_004254.2
10418	cg10500909	0.65506	16.1785	16.1785	0.0241075	0.0224231	3899.39	121	0.14159	0.632637	0	1	4023.79	121	0.162614	CYP11B2	GeneID:1585	CPN2; ALDOS; CYP11B; CYP11BL; P450C18; P-450C18; P450aldo;	NM_000498.2
21959	cg21985470	0.853298	16.1597	16.1597	0.024212	0.0146009	10565	121	0.0888107	0.838697	0	1	10759.3	121	0.131938	PKLR	GeneID:5313	PK1; PKL; RPK;	NM_000298.3
2885	cg02883621	0.863065	16.111	16.111	0.0244852	0.0140439	18903	121	0.079744	0.849021	0	1	19024.6	121	0.107346	S100P	GeneID:6286	MIG9;	NM_005980.2
14901	cg14896003	0.935291	16.0499	16.0499	0.024832	0.00956231	20807	121	0.0204821	0.925729	0	1	20720.8	121	0.0682605	RASSF7	GeneID:8045	HRC1; HRAS1; C11orf13; MGC126069;	NM_003475.2
501	cg00488300	0.857013	15.9899	15.9899	0.0251776	0.0143439	14738.2	121	0.142376	0.842669	0	1	14711.2	121	0.160257	TPSG1	GeneID:25823	TMT; trpA; PRSS31;	NM_012467.2
3149	cg03128832	0.703591	15.9789	15.9789	0.025241	0.0209619	2752.89	121	0.157745	0.682629	0	1	2836.57	121	0.18704	APOL5	GeneID:80831	APOL-V;	NM_030642.1
8351	cg08402568	0.941491	15.9692	15.9692	0.0252978	0.00911999	20229	121	0.0725777	0.93237	0	1	20356.7	121	0.101685	MGC34647	GeneID:146433		NM_152456.1
20059	cg20082641	0.856925	15.9659	15.9659	0.0253169	0.01433	6256.4	121	0.14943	0.842595	0	1	6255.02	121	0.175026	PAQR5	GeneID:54852	MPRG; FLJ20190;	NM_017705.2
17496	cg17470143	0.763772	15.9418	15.9418	0.0254579	0.0187655	5929.76	121	0.16318	0.745006	0	1	6003.17	121	0.185843	DCAMKL1	GeneID:9201	DCLK; KIAA0369;	NM_004734.2
16529	cg16462075	0.833657	15.9199	15.9199	0.0255864	0.0155461	11392.9	121	0.196021	0.81811	0	1	11278.8	121	0.219756	MUC3B	GeneID:57876		XM_168578.6
1061	cg01040850	0.68464	15.8537	15.8537	0.0259798	0.0214556	6061.91	121	0.13728	0.663185	0	1	6206.8	121	0.149373	MR1	GeneID:3140	HLALS;	NM_001531.1
15551	cg15550350	0.896659	15.8405	15.8405	0.0260584	0.0119821	18349.1	121	0.0577356	0.884677	0	1	18331.9	121	0.0947221	GRK7	GeneID:131890	GPRK7;	NM_139209.2
8078	cg08109646	0.748742	15.7855	15.7855	0.0263908	0.0192857	6910.27	121	0.186101	0.729457	0	1	7036.52	121	0.212758	ZNF683	GeneID:257101	MGC33414; RP11-569G9.6;	NM_173574.1
1028	cg00995152	0.750297	15.7478	15.7478	0.0266209	0.0192031	6006.06	121	0.15078	0.731094	0	1	6034.65	121	0.177837	DAB2IP	GeneID:153090	AIP1; AF9Q34; DIP1/2; KIAA1743;	NT_008470.18
21987	cg22021786	0.854003	15.7478	15.7478	0.0266209	0.0144115	10148.5	121	0.176784	0.839591	0	1	10036	121	0.197163	WFDC8	GeneID:90199	WAP8; C20orf170; dJ461P17.1;	NM_181510.1
22426	cg22459359	0.0136848	-15.7054	15.7054	0.0268821	-0.00901611	25606.4	121	0.00785033	0.0227009	0	1	25799	121	0.0627412	ZMYM6	GeneID:9204	MYM; ZNF258; ZNF198L4;	NM_007167.2
6214	cg06244906	0.621519	15.631	15.631	0.0273463	0.0228294	14135.4	121	0.134251	0.598689	0	1	14177	121	0.143854	ZIM2	GeneID:23619		NT_011109.15
21294	cg21307628	0.802645	15.631	15.631	0.0273463	0.0169434	6492.42	121	0.171718	0.785701	0	1	6641.99	121	0.193277	URB	GeneID:151887	DRO1; SSG1;	NM_199511.1
18774	cg18771300	0.501875	-15.6285	15.6285	0.0273621	-0.0239756	8763.17	121	0.215353	0.52585	0	1	8889.22	121	0.196105	RHOJ	GeneID:57381	TCL; ARHJ; TC10B; RASL7B; FLJ14445;	NM_020663.2
20620	cg20664201	0.856991	15.5859	15.5859	0.0276321	0.0141863	14311.9	121	0.0798896	0.842804	0	1	14337.6	121	0.101844	INHBE	GeneID:83729	MGC4638;	NM_031479.3
13061	cg13145013	0.939544	15.5635	15.5635	0.027775	0.00914854	15106.9	121	0.0276414	0.930396	0	1	15043.1	121	0.066965	H19	GeneID:283120	ASM; BWS; ASM1; MGC4485; PRO2605; D11S813E;	NR_002196.1
14365	cg14375111	0.801873	15.5635	15.5635	0.027775	0.0169333	14579	121	0.188093	0.78494	0	1	14882	121	0.207339	TMEM43	GeneID:79188	MGC3222; DKFZp586G1919;	NM_024334.1
15744	cg15720064	0.943042	15.5635	15.5635	0.027775	0.00891465	12101.2	121	0.0437622	0.934127	0	1	11805.6	121	0.0777282	FAM9C	GeneID:171484		NM_174901.3
7351	cg07371530	0.937972	15.4772	15.4772	0.0283319	0.00923645	24339.9	121	0.059426	0.928736	0	1	24396.3	121	0.0873403	RPUSD1	GeneID:113000	RLUCL; C16orf40; MGC19600;	NM_058192.2
5901	cg05912121	0.89508	15.4389	15.4389	0.0285833	0.011952	17493.8	121	0.0535023	0.883127	0	1	17073	121	0.0874674	TH	GeneID:7054	TYH;	NM_199292.1
4047	cg03998348	0.765512	15.422	15.422	0.0286945	0.0184436	3869.72	121	0.155024	0.747069	0	1	3993	121	0.190969	TMCO5	GeneID:145942	FLJ35807; MGC35118;	NM_152453.2
22766	cg22802439	0.849799	15.422	15.422	0.0286945	0.0145047	7092.87	121	0.0592532	0.835295	0	1	7001.19	121	0.0804769	UPK1A	GeneID:11045	UP1A; UPIA; UPKA; TSPAN21; MGC14388;	NM_007000.2
12438	cg12514506	0.820812	15.3902	15.3902	0.0289052	0.0159621	9244.44	121	0.132448	0.80485	0	1	9306.76	121	0.146768	OSBPL5	GeneID:114879	ORP5; OBPH1;	NT_009237.17
13743	cg13795840	0.854065	15.3902	15.3902	0.0289052	0.0142611	16042.5	121	0.0414368	0.839804	0	1	16091	121	0.0589179	C19orf24	GeneID:55009	FLJ20640;	NM_017914.2
10469	cg10545682	0.0635531	-15.3359	15.3359	0.029269	-0.0120856	15204.3	121	0.114577	0.0756387	0	1	15422.9	121	0.131506	TUFT1	GeneID:7286		NM_020127.1
20890	cg20931907	0.903853	15.3359	15.3359	0.029269	0.0113787	12954.2	121	0.146566	0.892474	0	1	12953.5	121	0.157685	LOC340602	GeneID:340602	MGC47837;	NM_203407.1
21569	cg21578906	0.864674	15.3085	15.3085	0.0294542	0.0136521	12378.8	121	0.136903	0.851022	0	1	12468.6	121	0.155507	SLC5A4	GeneID:6527	SAAT1; SGLT3; DJ90G24.4;	NM_014227.1
13588	cg13649728	0.915935	15.2497	15.2497	0.0298558	0.0106023	31305.8	121	0.0439554	0.905333	0	1	31334	121	0.0788432	SLC25A31	GeneID:83447	AAC4; ANT4; DKFZP434N1235;	NM_031291.1
15437	cg15439078	0.905028	15.2497	15.2497	0.0298558	0.0112805	22754.9	121	0.0654576	0.893747	0	1	22710.9	121	0.0969385	MYL3	GeneID:4634	CMH8; VLC1; MLC1V;	NM_000258.1
3871	cg03842617	0.857721	15.1899	15.1899	0.0302696	0.0139826	22544.8	121	0.170359	0.843738	0	1	22589.6	121	0.188204	NOS3	GeneID:4846	eNOS; ECNOS; NOS III;	NM_000603.3
11608	cg11675413	0.921834	15.1899	15.1899	0.0302696	0.0102101	14898.8	121	0.0346595	0.911624	0	1	14881.2	121	0.0685074	RNF113B	GeneID:140432	RNF161; MGC26599; ZNF183L1; bA10G5.1;	NM_178861.3
11778	cg11828089	0.897045	15.1899	15.1899	0.0302696	0.0117401	22713.8	121	0.079851	0.885305	0	1	23001.9	121	0.107884	CALN1	GeneID:83698		NM_031468.2
22048	cg22077553	0.810413	15.1899	15.1899	0.0302696	0.0163716	12116.1	121	0.180836	0.794042	0	1	11992	121	0.200081	MYOC	GeneID:4653	GPOA; JOAG; TIGR; GLC1A; JOAG1; myocilin;	NM_000261.1
3271	cg03251857	0.844179	15.0612	15.0612	0.0311805	0.0146561	10880.8	121	0.114854	0.829523	0	1	11145.6	121	0.136288	PPAPDC3	GeneID:84814	C9orf67; FLJ14662; KIAA0515; MGC12921; RP11-643E14.1;	NM_032728.2
8378	cg08430598	0.863302	15.0612	15.0612	0.0311805	0.0136358	12861.8	121	0.149757	0.849667	0	1	12766.8	121	0.162818	CST1	GeneID:1469		NM_001898.2
24243	cg24307225	0.0369915	-15.0612	15.0612	0.0311805	-0.010369	20000	121	0.0180116	0.0473605	0	1	20090.5	121	0.05675	CSNK2A2	GeneID:1459	CK2A2; CSNK2A1;	NM_001896.2
22521	cg22552966	0.916206	15.0385	15.0385	0.0313439	0.0105202	22299.3	121	0.158674	0.905685	0	1	22098.4	121	0.169791	FLJ31196	GeneID:146802	MATE2;	NM_152908.2
27274	cg27336379	0.813569	15.0385	15.0385	0.0313439	0.0161529	8040.03	121	0.102338	0.797416	0	1	8190.68	121	0.128635	SLC44A5	GeneID:204962	CTL5; FLJ34081; MGC34032;	NM_152697.2
18169	cg18152830	0.815465	14.9993	14.9993	0.031628	0.0160458	14018.5	121	0.208235	0.79942	0	1	13980.2	121	0.235859	TNFRSF13B	GeneID:23495	TACI; CD267; MGC39952; MGC133214; TNFRSF14B;	NM_012452.2
1566	cg01545079	0.9156	14.9524	14.9524	0.0319714	0.0105349	13954.1	121	0.0643063	0.905065	0	1	13917.5	121	0.0929331	CPNE6	GeneID:9362	N-COPINE;	NM_006032.2
12671	cg12728629	0.903693	14.9524	14.9524	0.0319714	0.0112669	17790.9	121	0.111305	0.892426	0	1	17711.8	121	0.132407	MAGEA2	GeneID:4101	MAGE2; MAGEA2A;	NM_005361.2
19551	cg19560210	0.766879	14.9444	14.9444	0.0320303	0.0181351	2814.25	121	0.143064	0.748744	0	1	2843.22	121	0.161976	PGBD5	GeneID:79605	FLJ11413; DKFZp761A0620;	NM_024554.2
14852	cg14847483	0.318592	14.89	14.89	0.0324339	0.0215569	7900.81	121	0.0916038	0.297035	0	1	7897.52	121	0.095159	TMEM85	GeneID:51234	PIG17; FLJ90746; MGC24415;	NM_016454.2
15856	cg15798153	0.670848	14.89	14.89	0.0324339	0.0212598	4554.5	121	0.161404	0.649589	0	1	4638.77	121	0.184256	PFTK1	GeneID:5218	KIAA0834; PFTAIRE1;	NM_012395.2
19789	cg19812619	0.744517	14.89	14.89	0.0324339	0.0189587	12298.5	121	0.165493	0.725558	0	1	12246.7	121	0.188432	ITGB7	GeneID:3695		NM_000889.1
25636	cg25651984	0.922255	14.8455	14.8455	0.0327679	0.0100821	26872.7	121	0.0931927	0.912173	0	1	26925.2	121	0.119816	MAGEC1	GeneID:9947	CT7; MAGE-C1;	NM_005462.3
3628	cg03604278	0.672937	14.8226	14.8226	0.0329414	0.0211651	3612.19	121	0.146977	0.651772	0	1	3702.07	121	0.165093	CIDEC	GeneID:63924	Fsp27; CIDE-3; FLJ20871;	NM_022094.2
23300	cg23324787	0.626784	14.7769	14.7769	0.0332898	0.0221907	2552.66	121	0.140927	0.604594	0	1	2616.67	121	0.156127	RAG2	GeneID:5897		NM_000536.1
5230	cg05208153	0.835492	14.7461	14.7461	0.0335269	0.0149554	21627	121	0.180125	0.820536	0	1	21748.5	121	0.201461	C9orf24	GeneID:84688	CBE1; MGC32921; MGC33614; NYD-SP22; bA573M23.4;	NM_147168.1
7203	cg07220939	0.447642	-14.7461	14.7461	0.0335269	-0.0234648	5354.61	121	0.126818	0.471106	0	1	5277.74	121	0.142488	SLC22A12	GeneID:116085	RST; OAT4L; URAT1;	NM_144585.2
20990	cg21033494	0.849453	14.7461	14.7461	0.0335269	0.0142421	6861.52	121	0.117844	0.835211	0	1	6900.25	121	0.140018	MSMB	GeneID:4477	MSP; PSP; IGBF; MSPB; PN44; PRPS; PSP57; PSP94; PSP-94;	NM_002443.2
25020	cg25042226	0.890675	14.698	14.698	0.0338999	0.0119548	13541.9	121	0.156307	0.87872	0	1	13590.1	121	0.170428	PAX8	GeneID:7849		NM_013951.2
1926	cg01909245	0.739255	14.6462	14.6462	0.0343069	0.0190232	7519.04	121	0.153486	0.720232	0	1	7717.46	121	0.169752	LSP1	GeneID:4046	WP34; pp52;	NM_002339.2
2350	cg02311163	0.793772	14.6462	14.6462	0.0343069	0.016857	4793.47	121	0.158754	0.776915	0	1	4843.49	121	0.182617	SEMG2	GeneID:6407	SGII;	NM_003008.2
5587	cg05590257	0.144056	-14.6462	14.6462	0.0343069	-0.0160511	11565.2	121	0.0850689	0.160107	0	1	11859.7	121	0.106541	LOC201164	GeneID:201164		NM_178836.2
6228	cg06256735	0.708916	14.6462	14.6462	0.0343069	0.0200205	4220.98	121	0.141065	0.688896	0	1	4483.14	121	0.185393	MFAP5	GeneID:8076	MP25; MAGP2;	NM_003480.2
9863	cg09936762	0.771174	14.6462	14.6462	0.0343069	0.017799	4715.04	121	0.176702	0.753375	0	1	4853.11	121	0.206424	RAI17	GeneID:57178	Zimp10; FLJ13541; KIAA1224;	NM_020338.2
17919	cg17894008	0.897554	14.5909	14.5909	0.0347467	0.0115107	11191.1	121	0.0911086	0.886043	0	1	11307.6	121	0.117375	NACAL	GeneID:342538	ANAC; NACA2; MGC71999;	NM_199290.2
3285	cg03270204	0.799835	14.5732	14.5732	0.0348886	0.0165511	8754	121	0.192407	0.783284	0	1	8583.52	121	0.21694	DDR1	GeneID:780	CAK; DDR; NEP; PTK3; RTK6; TRKE; CD167; EDDR1; MCK10; NTRK4; PTK3A;	NM_001954.3
7402	cg07432969	0.915357	14.5732	14.5732	0.0348886	0.0104274	20576.7	121	0.0683528	0.904929	0	1	20482.7	121	0.094627	GPR35	GeneID:2859		NM_005301.2
18393	cg18389810	0.821921	14.4867	14.4867	0.0355902	0.0155071	4890.13	121	0.190742	0.806414	0	1	4953.89	121	0.216004	C14orf8	GeneID:122664		NM_173846.3
19248	cg19250907	0.815412	14.481	14.481	0.0356366	0.015808	4977.24	121	0.15035	0.799604	0	1	5065.97	121	0.170289	CPA6	GeneID:57094	CPAH;	NM_020361.2
2892	cg02899723	0.934404	14.4708	14.4708	0.0357207	0.00919789	16608.9	121	0.0841598	0.925206	0	1	16807	121	0.106713	DDX4	GeneID:54514	VASA; MGC111074;	NM_024415.1
25451	cg25461905	0.937427	14.4708	14.4708	0.0357207	0.00900102	17956.7	121	0.0315117	0.928426	0	1	18100.5	121	0.0712845	C1orf49	GeneID:84066	FLJ40199; MGC26863; DKFZP564J047; RP5-990P15.1;	NM_032126.1
9372	cg09440243	0.740653	14.436	14.436	0.0360082	0.0188506	3460.34	121	0.141464	0.721802	0	1	3578.86	121	0.186046	PTPRD	GeneID:5789	HPTP; PTPD; HPTPD; MGC119750; MGC119751; MGC119752; MGC119753; HPTP-DELTA; R-PTP-DELTA;	NM_130391.1
9467	cg09532664	0.732744	14.3866	14.3866	0.0364197	0.019106	2408.97	121	0.126141	0.713638	0	1	2416.14	121	0.153635	TAS2R1	GeneID:50834	T2R1; TRB7;	NM_019599.2
14552	cg14547335	0.869631	14.3689	14.3689	0.0365687	0.0130197	20065.2	121	0.179189	0.856611	0	1	20495.9	121	0.197981	ATP2B2	GeneID:491	PMCA2;	NM_001683.2
22266	cg22294577	0.857818	14.283	14.283	0.0372989	0.0136256	16227.1	121	0.157115	0.844192	0	1	16351.1	121	0.179996	SLC26A3	GeneID:1811	CLD; DRA;	NM_000111.1
24875	cg24908058	0.90535	14.283	14.283	0.0372989	0.0109568	20106.9	121	0.0926407	0.894393	0	1	19803.2	121	0.106058	CGB5	GeneID:93659	HCG;	NM_033043.1
13636	cg13694749	0.868671	14.2715	14.2715	0.0373977	0.0130369	15759.4	121	0.128537	0.855634	0	1	16039.2	121	0.147704	SCN4A	GeneID:6329	HYPP; HYKPP; NAC1A; Nav1.4; hNa(V)1.4;	NM_000334.3
26567	cg26609631	0.0837873	-14.2715	14.2715	0.0373977	-0.0128563	14239.2	121	0.132568	0.0966436	0	1	14066.8	121	0.147718	GSH1	GeneID:219409	Gsh-1;	NM_145657.1
16512	cg16431978	0.758456	14.2558	14.2558	0.0375334	0.0181047	13990.5	121	0.179107	0.740351	0	1	13811.1	121	0.207312	KRTAP13-3	GeneID:337960	KAP13.3; MGC119828;	NM_181622.1
5187	cg05156613	0.962871	14.1809	14.1809	0.0381862	0.00723976	19808.2	121	0.0159071	0.955631	0	1	19753.5	121	0.0677029	ACTL7B	GeneID:10880		NM_006686.2
9664	cg09737668	0.886325	14.1809	14.1809	0.0381862	0.0120248	12583.5	121	0.0970725	0.8743	0	1	12721.4	121	0.116523	SLAMF9	GeneID:89886	SF2001; CD2F-10; CD84-H1; PRO4421; MGC88194;	NM_033438.1
21627	cg21631754	0.959591	14.1809	14.1809	0.0381862	0.00746298	20034	121	0.0115983	0.952128	0	1	20014.6	121	0.0664053	XTP7	GeneID:90332	MGC16332;	NM_138568.2
25975	cg25995460	0.835696	14.1809	14.1809	0.0381862	0.0147073	7328.67	121	0.123168	0.820989	0	1	7267.78	121	0.140517	C1QA	GeneID:712		NM_015991.1
19849	cg19857541	0.915379	14.1639	14.1639	0.0383365	0.0103041	12984.8	121	0.0907721	0.905075	0	1	13055.5	121	0.108314	MORC1	GeneID:27136	MORC; ZCW6;	NM_014429.2
612	cg00587613	0.847525	14.1457	14.1457	0.0384975	0.0140627	15459.9	121	0.0891838	0.833462	0	1	15312	121	0.111697	GPR152	GeneID:390212	PGR5;	NM_206997.1
3925	cg03883519	0.0719757	14.1457	14.1457	0.0384975	0.0114868	23013.9	121	0.0525329	0.0604889	0	1	22297.1	121	0.0441199	MGC33302	GeneID:256471		NM_152778.1
4215	cg04180460	0.0536106	-14.1457	14.1457	0.0384975	-0.0110782	16314.7	121	0.0230445	0.0646888	0	1	16160.3	121	0.053928	CTNNB1	GeneID:1499	CTNNB;	NM_001904.2
6960	cg06973652	0.80499	14.1457	14.1457	0.0384975	0.0160978	5208.38	121	0.0510966	0.788892	0	1	5319.07	121	0.0863759	BRCA1	GeneID:672	IRIS; PSCP; BRCAI; BRCC1; RNF53;	NM_007294.2
11624	cg11692021	0.772451	14.1457	14.1457	0.0384975	0.017473	10079.6	121	0.151842	0.754978	0	1	10013.5	121	0.169534	GNB3	GeneID:2784		NM_002075.2
14354	cg14366490	0.731373	14.1457	14.1457	0.0384975	0.0189983	12453.3	121	0.182168	0.712375	0	1	12568.3	121	0.205146	TXNL6	GeneID:115861	RDCVF;	NM_138454.1
14793	cg14792155	0.94157	14.1457	14.1457	0.0384975	0.00863755	17422.5	121	0.0516603	0.932932	0	1	17492.2	121	0.0833929	PLA2G4E	GeneID:123745	FLJ45651; MGC126633; MGC126661;	NM_198442.1
17257	cg17229197	0.793902	14.1457	14.1457	0.0384975	0.016579	5539.28	121	0.146223	0.777323	0	1	5553.2	121	0.172223	KCNQ1	GeneID:3784	LQT; RWS; WRS; LQT1; ATFB1; KCNA8; KCNA9; Kv1.9; Kv7.1; KVLQT1;	NT_009237.17
23707	cg23749046	0.807632	14.1457	14.1457	0.0384975	0.0159693	6137.75	121	0.195394	0.791663	0	1	6278.13	121	0.220873	GPR61	GeneID:83873	BALGR; GPCR3;	NM_031936.3
23760	cg23812886	0.771712	14.1457	14.1457	0.0384975	0.0175244	4717.06	121	0.146694	0.754188	0	1	4815.32	121	0.167296	SSX5	GeneID:6758	MGC9494;	NM_021015.3
26779	cg26808784	0.899995	14.1331	14.1331	0.0386092	0.011188	8995.99	121	0.128905	0.888807	0	1	9215.14	121	0.151713	H19	GeneID:283120	ASM; BWS; ASM1; MGC4485; PRO2605; D11S813E;	NT_009237.17
745	cg00718513	0.664665	14.1079	14.1079	0.0388341	0.0208858	4172.18	121	0.148023	0.643779	0	1	4191.57	121	0.17155		GeneID:28905
1434	cg01423840	0.801036	14.1079	14.1079	0.0388341	0.0162281	6402.7	121	0.185743	0.784808	0	1	6395.77	121	0.210453	FATE1	GeneID:89885	FATE;	NM_033085.2
5329	cg05322019	0.869105	14.1079	14.1079	0.0388341	0.0129032	14657.4	121	0.125972	0.856202	0	1	14868.6	121	0.146684	SEMA4G	GeneID:57715	FLJ20590; KIAA1619;	NM_017893.2
13184	cg13266631	0.118497	-14.1079	14.1079	0.0388341	-0.0145431	6603.04	121	0.166766	0.13304	0	1	6682.56	121	0.184525	NEFL	GeneID:4747	NFL; NF-L; NF68; CMT1F; CMT2E;	NM_006158.1
14114	cg14141399	0.905096	14.1079	14.1079	0.0388341	0.0108763	13176.4	121	0.0602036	0.894219	0	1	13289.1	121	0.0876622	HAS1	GeneID:3036	HAS;	NM_001523.1
4182	cg04132607	0.926312	14.1009	14.1009	0.0388965	0.00956988	24816	121	0.068775	0.916742	0	1	24919.1	121	0.0990027	GATA5	GeneID:140628	bB379O24.1;	NT_011362.9
11641	cg11706111	0.841034	14.1009	14.1009	0.0388965	0.0143408	12198.8	121	0.130531	0.826693	0	1	12163.1	121	0.143961	ZNF19	GeneID:7567	KOX12; MGC51021;	NM_006961.2
25643	cg25659818	0.783277	14.1009	14.1009	0.0388965	0.0169674	6880.98	121	0.119374	0.766309	0	1	7082.55	121	0.127323	CCL4	GeneID:6351	ACT2; G-26; LAG1; MIP1B; SCYA2; SCYA4; AT744.1; MGC104418; MGC126025; MGC126026; MIP-1-beta;	NM_002984.1
27346	cg27412093	0.823495	14.1009	14.1009	0.0388965	0.0151973	8302.37	121	0.163998	0.808298	0	1	8379.89	121	0.187556	CAPN9	GeneID:10753	GC36; nCL-4;	NM_006615.2
8273	cg08321330	0.802073	14.0823	14.0823	0.0390638	0.0161551	14694.6	121	0.163578	0.785918	0	1	14553.6	121	0.183324	TPSB2	GeneID:64499	TPS2; TPSB1; tryptaseC;	NM_024164.5
22855	cg22889448	0.807423	14.0585	14.0585	0.0392781	0.0159074	10318.9	121	0.152328	0.791516	0	1	10373.7	121	0.171746	EMR1	GeneID:2015	TM7LN3;	NM_001974.3
24468	cg24499411	0.713594	14.0424	14.0424	0.0394244	0.0194544	8315.01	121	0.15788	0.69414	0	1	8535.88	121	0.175288	TNS3	GeneID:64759	TEM6; TENS1; FLJ13732; FLJ35545; MGC88434; H_NH049I23.2; DKFZp686M1045;	NM_022748.9
14946	cg14934821	0.81691	14.0139	14.0139	0.0396831	0.0154562	7134.76	121	0.198509	0.801454	0	1	7305.8	121	0.223892	GPSM1	GeneID:26086	AGS3; DKFZP727I051;	NM_015597.2
19477	cg19481052	0.610874	14.0139	14.0139	0.0396831	0.0218891	2170.01	121	0.123165	0.588985	0	1	2226.91	121	0.148416	PLP1	GeneID:5354	PLP; PMD; MMPL; SPG2; PLP/DM20;	NM_000533.3
6800	cg06811800	0.832475	14.0115	14.0115	0.0397058	0.0147087	5684.64	121	0.161853	0.817766	0	1	5692.88	121	0.184189	ATP4B	GeneID:496	ATP6B;	NM_000705.2
9205	cg09261262	0.800657	14.0115	14.0115	0.0397058	0.0161731	10569.5	121	0.173487	0.784484	0	1	10408.7	121	0.192853	OPN4	GeneID:94233	MOP;	NM_033282.2
25207	cg25214346	0.898089	14.0115	14.0115	0.0397058	0.0112304	14556.8	121	0.0724469	0.886858	0	1	15048.2	121	0.10409	NR1I3	GeneID:9970	CAR; CAR1; MB67; CAR-SV1; CAR-SV4; CAR-SV6; CAR-SV7; CAR-SV8; CAR-SV9; CAR-BETA; CAR-SV10; CAR-SV12; CAR-SV13; CAR-SV14; CAR-SV21;	NM_005122.2
22041	cg22068211	0.929107	13.9601	13.9601	0.0401782	0.00935042	21513.1	121	0.047487	0.919756	0	1	21534	121	0.0814799	C3orf27	GeneID:23434	GR6;	NM_007354.1
22607	cg22637941	0.884533	13.9538	13.9538	0.0402365	0.011981	6752.9	121	0.0872219	0.872552	0	1	6818.93	121	0.115827	WISP1	GeneID:8840	CCN4; WISP1i;	NM_003882.2
10291	cg10365880	0.873683	13.9455	13.9455	0.0403133	0.0125728	15327.1	121	0.153973	0.86111	0	1	15261.6	121	0.171877	PKD2L1	GeneID:9033	PCL; PKDL; PKD2L;	NM_016112.2
5814	cg05823029	0.797494	13.8929	13.8929	0.0408051	0.0162548	27653.1	121	0.142978	0.781239	0	1	27249.1	121	0.153795	ATP4B	GeneID:496	ATP6B;	NM_000705.2
14441	cg14448116	0.874817	13.8929	13.8929	0.0408051	0.0124934	15120.5	121	0.108019	0.862324	0	1	15291	121	0.131123	ADAMTS4	GeneID:9507	ADMP-1; ADAMTS-2; ADAMTS-4; KIAA0688;	NM_005099.3
5570	cg05564657	0.906685	13.8833	13.8833	0.0408952	0.010685	16444.8	121	0.0676153	0.896	0	1	16462.5	121	0.0963073	AADAC	GeneID:13	DAC;	NM_001086.2
8772	cg08815403	0.788733	13.8515	13.8515	0.0411958	0.0166041	6611.14	121	0.19302	0.772129	0	1	6842.01	121	0.216963	HSD17B13	GeneID:345275	SCDR9; NIIL497; HMFN0376;	NM_178135.2
12316	cg12397274	0.670227	13.837	13.837	0.0413332	0.0205298	3090.02	121	0.14363	0.649697	0	1	3172.62	121	0.167162	TINAG	GeneID:27283	TIN1; TIN2; TIN-AG;	NM_014464.2
17564	cg17542495	0.724556	13.837	13.837	0.0413332	0.0189738	24850.3	121	0.17731	0.705582	0	1	24291.2	121	0.19096	GJB1	GeneID:2705	CMTX; CX32; CMTX1;	NM_000166.2
24373	cg24423088	0.890708	13.8056	13.8056	0.0416327	0.0115805	11818.6	121	0.142286	0.879127	0	1	11988.3	121	0.165124	KRTAP8-1	GeneID:337879	KAP8.1;	NM_175857.3
12270	cg12346881	0.815511	13.7964	13.7964	0.0417215	0.0154061	4983.4	121	0.133549	0.800105	0	1	5122.52	121	0.152089	ZNF300	GeneID:91975	DKFZp686B24204;	NM_052860.1
4088	cg04037228	0.569091	13.7957	13.7957	0.0417287	0.0223014	16889.7	121	0.148541	0.54679	0	1	16425.1	121	0.160977	LIMD1	GeneID:8994		NM_014240.1
23941	cg23984130	0.771011	13.7869	13.7869	0.0418127	0.0172763	5241.27	121	0.169278	0.753735	0	1	5240.06	121	0.198607		GeneID:28905
10915	cg11003133	0.707416	13.7836	13.7836	0.0418446	0.0194671	5074.82	121	0.175294	0.687948	0	1	5163.38	121	0.19972	AIM2	GeneID:9447	PYHIN4;	NM_004833.1
3020	cg03003745	0.822285	13.7603	13.7603	0.0420698	0.0150709	14509.9	121	0.181734	0.807214	0	1	14481.6	121	0.196447	UNQ473	GeneID:284340	VCC1;	NM_198477.1
299	cg00280814	0.794594	13.7075	13.7075	0.0425842	0.0162805	10225.8	121	0.192885	0.778314	0	1	10241.2	121	0.218055	FLJ31568	GeneID:150244		NM_152509.1
20217	cg20256783	0.889063	13.7072	13.7072	0.0425869	0.0116332	21416.8	121	0.0687434	0.87743	0	1	21259.7	121	0.0954839	K6HF	GeneID:9119		NM_004693.1
16064	cg15983005	0.826018	13.6909	13.6909	0.0427474	0.0148675	7905.05	121	0.179329	0.811151	0	1	8072.67	121	0.201201	KRTHA3A	GeneID:3883	HA3I; Ha-3I; Krt1-3; hHa3-I;	NM_004138.2
21433	cg21453309	0.949119	13.6415	13.6415	0.0432366	0.00799036	16182	121	0.0249923	0.941129	0	1	16444	121	0.0625138	FAM101A	GeneID:144347	FLJ44614;	NM_181709.2
13283	cg13349425	0.789605	13.5891	13.5891	0.0437617	0.0164393	5191.99	121	0.128948	0.773165	0	1	5488.37	121	0.158827	C5orf20	GeneID:140947	DCNP1;	NM_130848.1
8858	cg08901867	0.760096	13.5503	13.5503	0.0441545	0.0175818	3754.74	121	0.150686	0.742514	0	1	3750.06	121	0.182493	TTLL6	GeneID:284076	FLJ35808;	NM_173623.1
14805	cg14804557	0.869202	13.5503	13.5503	0.0441545	0.0126666	16307.6	121	0.0579161	0.856535	0	1	16151.4	121	0.0812321		GeneID:2003
5985	cg05997860	0.719788	13.5234	13.5234	0.0444287	0.0189557	7535.65	121	0.143108	0.700833	0	1	7822.15	121	0.196454	ADAM21	GeneID:8747	ADAM31; MGC125389;	NM_003813.2
1245	cg01237132	0.762977	13.5054	13.5054	0.0446131	0.0174414	4313.86	121	0.133304	0.745536	0	1	4459.56	121	0.18266	CST2	GeneID:1470	MGC71924;	NM_001322.2
2498	cg02500392	0.734818	13.5054	13.5054	0.0446131	0.0184371	3961.35	121	0.15683	0.716381	0	1	3973.77	121	0.186209	PBOV1	GeneID:59351	UC28; UROC28; dJ171N11.2;	NM_021635.1
4278	cg04256470	0.892211	13.5054	13.5054	0.0446131	0.0113845	12558.4	121	0.152289	0.880826	0	1	12341.3	121	0.161525	CORT	GeneID:1325	CST-14; CST-17; CST-29;	NM_001302.3
6728	cg06736444	0.743012	13.5054	13.5054	0.0446131	0.0181723	16451.3	121	0.192863	0.72484	0	1	16439.7	121	0.21485	SRRM2	GeneID:23524	300-KD; SRL300; SRm300; KIAA0324; MGC40295;	NM_016333.2
21722	cg21717724	0.624722	13.5054	13.5054	0.0446131	0.0213048	3946.46	121	0.158743	0.603418	0	1	4059.36	121	0.165114	PSMD5	GeneID:5711	S5B; KIAA0072; MGC23145;	NM_005047.2
26693	cg26738010	0.895349	13.5054	13.5054	0.0446131	0.0112054	17679.6	121	0.0973807	0.884144	0	1	17914.9	121	0.126941	CETN1	GeneID:1068	CEN1; CETN;	NM_004066.1
764	cg00730260	0.896507	13.4948	13.4948	0.0447221	0.0111351	16539.1	121	0.0235865	0.885372	0	1	16712.4	121	0.0820528	FLJ32894	GeneID:144360	MGC129798; MGC129799;	NM_144667.1
4561	cg04517429	0.0768235	-13.4636	13.4636	0.0450446	-0.0120997	13575.6	121	0.0617607	0.0889232	0	1	13628.4	121	0.0906921	DCHS2	GeneID:54798	CDHJ; CDH27; PCDHJ; PCDH23; FLJ20047;	NM_199348.1
17525	cg17501569	0.846034	13.435	13.435	0.0453421	0.0137919	13345.4	121	0.141732	0.832242	0	1	13348	121	0.156887	MSLN	GeneID:10232	MPF; SMR; CAK1;	NM_005823.4
6145	cg06190732	0.632834	13.4267	13.4267	0.0454287	0.021085	2365.02	121	0.129469	0.611749	0	1	2372.2	121	0.151816	SERPINA3	GeneID:12	ACT; AACT; GIG24; GIG25; MGC88254;	NM_001085.4
12557	cg12619162	0.830519	13.4267	13.4267	0.0454287	0.0145325	10343.1	121	0.209485	0.815986	0	1	10371.5	121	0.235592	FXYD4	GeneID:53828	CHIF;	NM_173160.2
24567	cg24613957	0.909366	13.4267	13.4267	0.0454288	0.0103689	24992.9	121	0.0572906	0.898998	0	1	25148.2	121	0.0905522	PLA2G2E	GeneID:30814		NM_014589.1
47	cg00042156	0.779938	13.4121	13.4121	0.0455822	0.016719	12788.3	121	0.182259	0.763219	0	1	12828.5	121	0.205249	MGC16291	GeneID:84856		NM_032770.3
21657	cg21660130	0.900367	13.2997	13.2997	0.0467764	0.0108582	14492.6	121	0.0673394	0.889509	0	1	14478.8	121	0.0980817	CLCNKB	GeneID:1188	CLCKB; hClC-Kb; MGC24087;	NM_000085.1
4667	cg04613080	0.560811	13.271	13.271	0.0470868	0.0219998	2693.29	121	0.139675	0.538811	0	1	2816.25	121	0.159029	CNGA2	GeneID:1260	CNCA; CNG2; CNCA1; OCNC1; OCNCa; FLJ46312; OCNCALPHA;	NM_005140.1
5699	cg05700681	0.810619	13.271	13.271	0.0470868	0.0153555	6838.85	121	0.195209	0.795263	0	1	6821.83	121	0.223061	CCL22	GeneID:6367	MDC; ABCD-1; SCYA22; STCP-1; DC/B-CK; MGC34554; A-152E5.1;	NM_002990.3
7855	cg07895149	0.0313271	-13.271	13.271	0.0470868	-0.00943161	16655.7	121	0.020808	0.0407587	0	1	16475.3	121	0.0451356	FAM26B	GeneID:51063		NM_015916.3
8264	cg08314660	0.906108	13.271	13.271	0.0470868	0.0105092	25668.1	121	0.145515	0.895599	0	1	25792.8	121	0.161217	PKP3	GeneID:11187		NM_007183.2
8314	cg08365982	0.878328	13.271	13.271	0.0470868	0.0120552	12139.2	121	0.131707	0.866273	0	1	12200.6	121	0.151661	CAV3	GeneID:859	VIP21; LGMD1C; VIP-21; MGC126100; MGC126101; MGC126129;	NM_001234.3
8774	cg08816023	0.816921	13.271	13.271	0.0470868	0.0150906	15672.1	121	0.189409	0.80183	0	1	15673	121	0.210623	FGF1	GeneID:2246	AFGF; ECGF; FGFA; ECGFA; ECGFB; HBGF1; GLIO703; ECGF-beta; FGF-alpha;	NM_033136.1
10513	cg10591659	0.61767	-13.271	13.271	0.0470868	-0.0208819	12556.5	121	0.160714	0.638552	0	1	12797.7	121	0.167857	NYX	GeneID:60506	CLRP; CSNB1; CSNB4;	NM_022567.1
12130	cg12188860	0.709384	13.271	13.271	0.0470868	0.0191213	11941.4	121	0.0985677	0.690263	0	1	11805.4	121	0.100678	TOP1MT	GeneID:116447	2900052H09Rik;	NM_052963.1
17252	cg17217677	0.931015	13.271	13.271	0.0470868	0.0090242	21697.2	121	0.0198379	0.921991	0	1	21468.2	121	0.0708786	SMPD3	GeneID:55512	NSMASE2; FLJ22593;	NM_018667.2
18930	cg18939260	0.948871	13.271	13.271	0.0470868	0.00790107	14560.1	121	0.0173355	0.94097	0	1	14483.9	121	0.0543352	MTSS1	GeneID:9788	MIM; MIMA; MIMB; KIAA0429;	NM_014751.2
24259	cg24323726	0.735167	13.271	13.271	0.0470868	0.0182686	15537.4	121	0.171751	0.716898	0	1	15715.1	121	0.190332	ZBED2	GeneID:79413	MGC10796;	NM_024508.3
19290	cg19297232	0.62426	13.2374	13.2374	0.047453	0.0211039	7073.75	121	0.0858103	0.603156	0	1	7051.88	121	0.0932712	SMPD3	GeneID:55512	NSMASE2; FLJ22593;	NM_018667.2
23575	cg23625458	0.941093	13.0795	13.0795	0.0492095	0.00835764	35985.1	121	0.0350036	0.932735	0	1	35843.1	121	0.070052	AFAR3	GeneID:246181	AKR7A4;	NM_201252.1
6849	cg06849227	0.946666	13.0221	13.0221	0.0498639	0.00799632	12735.7	121	0.0239424	0.938669	0	1	12846	121	0.0644046	KCNH6	GeneID:81033	ERG2; HERG2; Kv11.2;	NM_030779.2
18446	cg18434152	0.856288	13.0221	13.0221	0.0498639	0.0131177	5709.54	121	0.121012	0.843171	0	1	5884.73	121	0.145798	PROK1	GeneID:84432	PK1; PRK1; EGVEGF;	NM_032414.2
