# Supplementary material for: Phenotypic Subtyping and Re-Analysis of Existing Methylation Data from Autistic Probands in Simplex Families Reveal ASD Subtype-Associated Differentially Methylated Genes and Biological Functions
Source: Int J Mol Sci. 2020 Sep 19;21(18):6877. doi: 10.3390/ijms21186877 (PMC7555936; doi:10.3390/ijms21186877)
Supplement: Supplementary file 1 [file ijms-21-06877-s001.zip › ijms-927106-supplementary/Suppl. Materials_revised MS/Table S3. Significant DAGs in mild subgroup.xlsx]

## Sheet: Sheet1
		Patients								Siblings
Index	TargetID	P. AVG_Beta	P. DiffScore	|P. DiffScore|	p-value	P. Delta Beta	P. Intensity	P. NARRAYS	P. ARRAY_STDEV	S. AVG_Beta	S. DiffScore	S. Delta Beta	S. Intensity	S. NARRAYS	S. ARRAY_STDEV	SYMBOL	CHR	SYNONYM	ACCESSION	GENE_ID	CPG_ISLAND_LOCATIONS	MAPINFO
92	cg00079563	0.0931567	349.716	349.716	1.0677e-35	0.042111	15243.1	149	0.187654	0.0510457	0	1	15896.8	149	0.114982	ARFGAP3	22	ARFGAP1;	NM_014570.3	GeneID:26286	22:41582136-41584116	41583465
1304	cg01295203	0.0925227	349.716	349.716	1.0677e-35	0.0324835	17700	149	0.143001	0.0600392	0	1	17720.3	149	0.08408	PRDM14	8	PFM11; MGC59730;	NM_024504.2	GeneID:63978	8:71144163-71147771	71146753
1552	cg01530101	0.189002	349.716	349.716	1.0677e-35	0.0383178	29659.2	149	0.160057	0.150684	0	1	28765.2	149	0.112151	KCNQ1DN	11	BWRT; HSA404617;	NT_009237.17	GeneID:55539	11:2846828-2848015	2847674
1890	cg01870826	0.200165	349.716	349.716	1.0677e-35	0.0463766	11819.6	149	0.192292	0.153788	0	1	11719.1	149	0.120673	LOC389458	7	MGC:35170;	NM_203393.1	GeneID:389458	7:5078039-5078627	5078401
2009	cg01988129	0.151719	349.716	349.716	1.0677e-35	0.0395182	9874.13	149	0.170301	0.112201	0	1	9652.53	149	0.104539	ADHFE1	8	ADH8; FLJ32430; HMFT2263; MGC48605;	NM_144650.1	GeneID:137872	8:67506956-67507717	67507490
2456	cg02440177	0.076991	349.716	349.716	1.0677e-35	0.0284863	23156	149	0.13141	0.0485047	0	1	22890.1	149	0.0816178	ZNF702	19	FLJ12985;	NM_024924.3	GeneID:79986	19:58187792-58189007	58188507
2457	cg02441647	0.161942	349.716	349.716	1.0677e-35	0.0340027	5272.15	149	0.162612	0.12794	0	1	5201.56	149	0.107429	COL8A1	3	MGC9568;	NM_020351.2	GeneID:1295	3:100840163-100840365	100840189
2924	cg02919422	0.189309	349.716	349.716	1.0677e-35	0.0382571	18707.6	149	0.188478	0.151052	0	1	19138.6	149	0.116277	SOX17	8	FLJ22252;	NM_022454.2	GeneID:64321	8:55532627-55535230	55533097
3747	cg03731616	0.162613	349.716	349.716	1.0677e-35	0.0434889	8609.58	149	0.197711	0.119124	0	1	8882.78	149	0.119604	MYLK	3	KRP; MLCK; MLCK108; MLCK210; FLJ12216; DKFZp686I10125;	NM_005965.3	GeneID:4638	3:125085102-125086419	125086308
3801	cg03776060	0.294294	349.716	349.716	1.0677e-35	0.0481609	13995.2	149	0.136123	0.246133	0	1	14173.8	149	0.0951356	C9orf58	9	IBA2; FLJ12783; MGC29466; RP11-544A12.2;	NM_001002260.1	GeneID:83543	9:132961207-132962456	132962396
4101	cg04048259	0.116652	349.716	349.716	1.0677e-35	0.0309298	19312.3	149	0.136022	0.085722	0	1	18778.3	149	0.0897272	EDN3	20	ET3; MGC15067; MGC61498;	NM_000114.2	GeneID:1908	20:57308563-57309693	57308741
4481	cg04453065	0.0986112	349.716	349.716	1.0677e-35	0.0427182	14375.9	149	0.181728	0.0558931	0	1	13765.9	149	0.111719	CYR61	1	CCN1; GIG1; IGFBP10;	NM_001554.3	GeneID:3491	1:85818356-85819916	85819249
4706	cg04650786	0.0837653	349.716	349.716	1.0677e-35	0.0261284	17545.2	149	0.114713	0.0576369	0	1	17619.9	149	0.0676541	OSTM1	6	GL; GIPN; HSPC019;	NM_014028.3	GeneID:28962	6:108502055-108503715	108502238
4922	cg04875162	0.15784	349.716	349.716	1.0677e-35	0.0397469	6697.02	149	0.176787	0.118094	0	1	6730.78	149	0.109099	PABPC5	X	PABP5;	NM_080832.1	GeneID:140886	X:90576124-90576920	90576482
5118	cg05073035	0.161627	349.716	349.716	1.0677e-35	0.0460406	12114.4	149	0.194399	0.115586	0	1	12653.5	149	0.119544	ZIC1	3	ZIC; ZNF201;	NM_003412.3	GeneID:7545	3:148609249-148612068	148609883
5241	cg05221167	0.148618	349.716	349.716	1.0677e-35	0.0489679	14470.3	149	0.22297	0.0996503	0	1	14726.2	149	0.134835	ZNF560	19	FLJ31986; MGC119490; MGC119493;	NM_152476.1	GeneID:147741	19:9469758-9470740	9470397
5802	cg05807991	0.159573	349.716	349.716	1.0677e-35	0.0346603	7202.28	149	0.169176	0.124913	0	1	7335	149	0.111715	TRAM1L1	4	MGC26568;	NM_152402.1	GeneID:133022	4:118225823-118226399	118226256
6203	cg06238491	0.105939	349.716	349.716	1.0677e-35	0.0309007	13185.9	149	0.143879	0.0750386	0	1	13007.4	149	0.089657	LAIR1	19	CD305; LAIR-1;	NM_002287.2	GeneID:3903		59568258
6729	cg06738602	0.134066	349.716	349.716	1.0677e-35	0.0373592	13481.4	149	0.133854	0.0967067	0	1	13419.8	149	0.0838696	PTGER2	14	EP2;	NM_000956.2	GeneID:5732	14:51850265-51852038	51850384
6838	cg06836772	0.203619	349.716	349.716	1.0677e-35	0.0365792	15511.2	149	0.169281	0.167039	0	1	15522.1	149	0.103528	PRKAA2	1	AMPK; AMPK2; PRKAA;	NM_006252.2	GeneID:5563	1:56882948-56884107	56882991
7478	cg07499072	0.10197	349.716	349.716	1.0677e-35	0.0291018	21336.7	149	0.127313	0.072868	0	1	21189.4	149	0.077336	FST	5	FS;	NM_013409.1	GeneID:10468	5:52811100-52812543	52812451
8014	cg08044694	0.459163	349.716	349.716	1.0677e-35	0.04963	9895.7	149	0.176888	0.409533	0	1	9977.79	149	0.1301	BRD4	19	CAP; MCAP; HUNKI;	NM_058243.1	GeneID:23476	19:15252811-15253031	15252927
9014	cg09072120	0.113775	349.716	349.716	1.0677e-35	0.0284753	23787.1	149	0.117235	0.0853001	0	1	23435	149	0.074213	PRTFDC1	10	HHGP; FLJ11888;	NM_020200.5	GeneID:56952	10:25280993-25282054	25282037
9167	cg09227563	0.0945615	349.716	349.716	1.0677e-35	0.0271085	24528.5	149	0.117812	0.067453	0	1	24371.8	149	0.0740213	CDC42EP5	19	CEP5; Borg3; MGC21945; MGC71153;	NM_145057.2	GeneID:148170		59676517
9200	cg09260089	0.100678	349.716	349.716	1.0677e-35	0.0273565	16853.3	149	0.12747	0.0733215	0	1	16891	149	0.0804138	NKX6-2	10	GTX; NKX6B; NKX6.1; NKX6.2; MGC126684;	NM_177400.1	GeneID:84504	10:134447362-134452718	134449850
9583	cg09638834	0.191659	349.716	349.716	1.0677e-35	0.041188	7145.62	149	0.21254	0.150471	0	1	7108.42	149	0.131782	RAET1L	6		NM_130900.1	GeneID:154064		150388190
9894	cg09971811	0.409165	349.716	349.716	1.0677e-35	0.0508406	10800.3	149	0.196977	0.358324	0	1	10894	149	0.137992	CST7	20	CMAP; cystatin F;	NM_003650.2	GeneID:8530		24878099
9929	cg10009830	0.0882838	349.716	349.716	1.0677e-35	0.0267247	20970.5	149	0.128944	0.0615591	0	1	21686.9	149	0.0901021	FLJ14503	X	MGC104944;	NM_152780.2	GeneID:256714	X:20043987-20046213	20044825
10114	cg10193817	0.111308	349.716	349.716	1.0677e-35	0.0281049	15247.1	149	0.128431	0.0832031	0	1	15446.1	149	0.0811821	IGSF4	11	BL2; ST17; NECL2; TSLC1; IGSF4A; SYNCAM; sTSLC-1; synCAM1; DKFZp686F1789;	NM_014333.2	GeneID:23705	11:114880058-114881146	114880436
10469	cg10545682	0.0827314	349.716	349.716	1.0677e-35	0.0324225	16470	149	0.138824	0.0503089	0	1	16076	149	0.0801199	TUFT1	1		NM_020127.1	GeneID:7286	1:149779125-149780093	149779249
11259	cg11323198	0.108672	349.716	349.716	1.0677e-35	0.0299828	24913.8	149	0.137868	0.0786895	0	1	24690.6	149	0.0855611	CDH8	16		NM_001796.2	GeneID:1006	16:60625845-60628489	60627307
11473	cg11536940	0.141633	349.716	349.716	1.0677e-35	0.0455921	9820.53	149	0.200133	0.0960409	0	1	9960.3	149	0.126327	PGCP	8		NM_016134.2	GeneID:10404	8:97726093-97727293	97727252
12065	cg12111714	0.296789	349.716	349.716	1.0677e-35	0.0469012	4727.13	149	0.189804	0.249888	0	1	4588.24	149	0.12006	ATP8A2	13	IB; ATP; ML-1; ATPIB; DKFZP434B1913;	NM_016529.3	GeneID:51761	13:24940557-24941659	24941472
12084	cg12127282	0.269384	349.716	349.716	1.0677e-35	0.0441238	12909.4	149	0.195662	0.22526	0	1	12736.2	149	0.127109	HOXD4	2	HOX4; HOX4B; HHO.C13; HOX-5.1; Hox-4.2;	NM_014621.2	GeneID:3233	2:176722497-176722964	176722931
12107	cg12163490	0.0893536	349.716	349.716	1.0677e-35	0.0267594	16689.2	149	0.107725	0.0625942	0	1	16958.4	149	0.0714652	CDH11	16	OB; CAD11; CDHOB; OSF-4;	NM_001797.2	GeneID:1009	16:63711989-63713859	63713342
12140	cg12204574	0.146255	349.716	349.716	1.0677e-35	0.0368856	18551.7	149	0.179306	0.10937	0	1	18947.5	149	0.120867	GABRE	X		NM_004961.3	GeneID:2564	X:150893205-150894382	150893428
12286	cg12370791	0.0593774	349.716	349.716	1.0677e-35	0.0222896	22138	149	0.092785	0.0370878	0	1	22131.1	149	0.05299	HOXB9	17	HOX2; HOX2E; HOX-2.5;	NM_024017.3	GeneID:3219	17:44057124-44059246	44058649
12366	cg12439899	0.136496	349.716	349.716	1.0677e-35	0.0530463	11022.2	149	0.234144	0.0834497	0	1	11012.6	149	0.142199	TFAP2A	6	AP-2; AP2TF; TFAP2; AP-2alpha;	NM_003220.1	GeneID:7020	6:10519201-10524183	10523218
12462	cg12537796	0.152593	349.716	349.716	1.0677e-35	0.0406131	10819.1	149	0.19596	0.11198	0	1	11013.8	149	0.119848		X			GeneID:4611	X:106402236-106403147	106402474
12547	cg12610070	0.260197	349.716	349.716	1.0677e-35	0.0486736	19033.9	149	0.194888	0.211524	0	1	19164.5	149	0.124514	TSPAN15	10	NET-7; TM4SF15; 2700063A19Rik;	NM_012339.3	GeneID:23555	10:70880851-70882144	70881768
13021	cg13099330	0.186564	349.716	349.716	1.0677e-35	0.0458777	12606.5	149	0.202252	0.140686	0	1	12285.8	149	0.125503	RBP1	3	CRBP; RBPC; CRBP1; CRABP-I;	NM_002899.2	GeneID:5947	3:140740275-140741996	140740489
13122	cg13216057	0.101823	349.716	349.716	1.0677e-35	0.0334306	12369.4	149	0.14624	0.0683928	0	1	12276.9	149	0.0903159	DKK3	11	REIC;	NM_015881.5	GeneID:27122	11:11986258-11987753	11987219
13184	cg13266631	0.148222	349.716	349.716	1.0677e-35	0.046263	6989.45	149	0.198516	0.101959	0	1	6972.31	149	0.124754	NEFL	8	NFL; NF-L; NF68; CMT1F; CMT2E;	NM_006158.1	GeneID:4747	8:24870759-24871396	24870923
13195	cg13274713	0.0839102	349.716	349.716	1.0677e-35	0.0272399	21490.5	149	0.119569	0.0566703	0	1	21834	149	0.0733135	TBX2	17	FLJ10169;	NM_005994.3	GeneID:6909	17:56827708-56833527	56832068
13592	cg13652336	0.19113	349.716	349.716	1.0677e-35	0.0373368	12792	149	0.156843	0.153794	0	1	13171.8	149	0.0961074	DEPDC2	8	DEP.2; PREX2; P-REX2;	NM_024870.2	GeneID:80243	8:69026529-69027679	69026566
13841	cg13885201	0.100914	349.716	349.716	1.0677e-35	0.0270144	11733	149	0.117625	0.0738992	0	1	11667.5	149	0.068841	ZNF23	16	KOX16; ZNF359; ZNF612; Zfp612;	NM_145911.1	GeneID:7571	16:70053101-70053892	70053886
14266	cg14289985	0.14796	349.716	349.716	1.0677e-35	0.0472823	6771.61	149	0.211652	0.100678	0	1	7008.56	149	0.13232	ZNF471	19	ERP1; Z1971; KIAA1396;	NM_020813.1	GeneID:57573	19:61710502-61711930	61710660
14295	cg14312526	0.121044	349.716	349.716	1.0677e-35	0.0337446	32838.9	149	0.144489	0.0872996	0	1	31733.9	149	0.0931942	FOXL2	3	BPES; PFRK; POF3; BPES1; PINTO;	NM_023067.2	GeneID:668	3:140146281-140149275	140147981
15517	cg15520279	0.0864288	349.716	349.716	1.0677e-35	0.0346726	18612.3	149	0.150392	0.0517562	0	1	18145.4	149	0.0928783	HOXD8	2	HOX4; HOX4E; HOX5.4;	NM_019558.2	GeneID:3234	2:176701094-176703914	176703334
15546	cg15543551	0.200072	349.716	349.716	1.0677e-35	0.042484	13221.5	149	0.180386	0.157588	0	1	13016.3	149	0.116872	FGF12	3	FHF1; FGF12B;	NM_021032.2	GeneID:2257	3:193927501-193928340	193927896
15659	cg15640375	0.148131	349.716	349.716	1.0677e-35	0.0340708	22767.8	149	0.14638	0.114061	0	1	22448.8	149	0.0852228	PRG2	19	MBP; BMPG; MGC14537;	NM_024888.1	GeneID:79948	19:772219-774095	772565
15947	cg15873301	0.100028	349.716	349.716	1.0677e-35	0.032004	12192.6	149	0.132601	0.0680235	0	1	12187.7	149	0.0791696	SYN2	3	SYNII; SYNIIa; SYNIIb;	NM_133625.2	GeneID:6854	3:12020118-12021768	12020459
16049	cg15974053	0.0828093	349.716	349.716	1.0677e-35	0.0290619	25286.5	149	0.146779	0.0537474	0	1	24930.5	149	0.0968181	DHRS10	19	retSDR3;	NM_016246.2	GeneID:51171	19:54031203-54031666	54031601
16327	cg16254309	0.130187	349.716	349.716	1.0677e-35	0.0348514	12769.3	149	0.139405	0.0953351	0	1	12774.1	149	0.0825941	CNTNAP2	7	NRXN4; CASPR2; DKFZp781D1846;	NM_014141.3	GeneID:26047	7:145443587-145445242	145445085
16990	cg16954341	0.234371	349.716	349.716	1.0677e-35	0.0410206	14383	149	0.182454	0.19335	0	1	14549.6	149	0.11237	SCGN	6	SEGN; SECRET; setagin; DJ501N12.8;	NM_006998.3	GeneID:10590	6:25760176-25760849	25760360
17138	cg17105014	0.21277	349.716	349.716	1.0677e-35	0.0497216	6290.55	149	0.201588	0.163048	0	1	6566.24	149	0.123438	GYPC	2	GE; GPC; GYPD; CD236; CD236R; MGC117309; MGC126191; MGC126192;	NM_002101.3	GeneID:2995		127129833
17299	cg17264618	0.218088	349.716	349.716	1.0677e-35	0.0548633	10107.1	149	0.20475	0.163225	0	1	10250.3	149	0.127196	ENTPD3	3	HB6; CD39L3; NTPDase-3;	NM_001248.1	GeneID:956	3:40403461-40404047	40404018
17332	cg17301902	0.139577	349.716	349.716	1.0677e-35	0.0399697	13910.5	149	0.178484	0.0996068	0	1	13991.4	149	0.106453	GNA14	9		NM_004297.2	GeneID:9630	9:79451891-79453694	79453039
17439	cg17410236	0.0843748	349.716	349.716	1.0677e-35	0.0320054	17666.1	149	0.144781	0.0523694	0	1	18313.2	149	0.0903721	FLRT2	14	KIAA0405;	NM_013231.4	GeneID:23768	14:85065422-85066845	85066248
17946	cg17918501	0.0935934	349.716	349.716	1.0677e-35	0.0281515	15628.4	149	0.12752	0.0654419	0	1	15722.6	149	0.0775127	FNDC4	2	FRCP1; FLJ22362;	NM_022823.1	GeneID:64838	2:27571066-27571970	27571213
18027	cg18008766	0.143476	349.716	349.716	1.0677e-35	0.0350444	12455.7	149	0.159617	0.108431	0	1	12411.7	149	0.0987387	SFRS7	2	9G8; AAG3; HSSG1; RBM37; ZCRB2; ZCCHC20;	NM_001031684.1	GeneID:6432	2:38830946-38832545	38832400
19120	cg19133618	0.104249	349.716	349.716	1.0677e-35	0.0367535	11103.5	149	0.161315	0.067496	0	1	10937.1	149	0.0969337	CDKN2B	9	P15; MTS2; TP15; INK4B;	NM_004936.3	GeneID:1030	9:21998555-21999615	21998970
19302	cg19308222	0.187587	349.716	349.716	1.0677e-35	0.0380165	5170.05	149	0.149655	0.149571	0	1	5168.53	149	0.0949665	EREG	4	ER;	NM_001432.1	GeneID:2069	4:75449212-75449419	75449255
19478	cg19481686	0.0928607	349.716	349.716	1.0677e-35	0.0278884	11595.8	149	0.124989	0.0649722	0	1	11446	149	0.0807964	CDKN2B	9	P15; MTS2; TP15; INK4B;	NT_008413.17	GeneID:1030	9:21995095-21996291	21995288
19553	cg19560758	0.128488	349.716	349.716	1.0677e-35	0.0305833	27302.5	149	0.160431	0.097905	0	1	28186.1	149	0.102842	ERRFI1	1	MIG6; RALT; MIG-6; GENE-33;	NM_018948.2	GeneID:54206	1:8008041-8009751	8009308
19972	cg19986872	0.0881559	349.716	349.716	1.0677e-35	0.0304381	23637.4	149	0.140874	0.0577179	0	1	22787.4	149	0.0895375	ACSL6	5	ACS2; FACL6; LACS2; LACS5; KIAA0837;	NM_015256.2	GeneID:23305	5:131374645-131375803	131375672
20409	cg20449692	0.132587	349.716	349.716	1.0677e-35	0.0311102	26484.4	149	0.130816	0.101477	0	1	25995.3	149	0.0820453	CLDN11	3	OSP; OTM;	NM_005602.4	GeneID:5010	3:171618793-171620758	171619614
20782	cg20832009	0.197372	349.716	349.716	1.0677e-35	0.0454176	11699.5	149	0.197785	0.151954	0	1	11923.9	149	0.125021	STARD8	X	KIAA0189; DKFZp686H1668;	NM_014725.2	GeneID:9754	X:67784063-67784532	67784443
21120	cg21153758	0.0816844	349.716	349.716	1.0677e-35	0.0293443	28773.6	149	0.110396	0.05234	0	1	28270.2	149	0.069609	ITGA1	5	VLA1; CD49a;	NM_181501.1	GeneID:3672	5:52119061-52120216	52119749
21542	cg21553596	0.0907292	349.716	349.716	1.0677e-35	0.0311004	15633.7	149	0.145425	0.0596288	0	1	15438.1	149	0.0874991	FAM3B	21	2-21; ORF9; PANDER; PRED44; C21orf11; C21orf76;	NM_058186.3	GeneID:54097	21:41610281-41611298	41610505
21845	cg21870662	0.20637	349.716	349.716	1.0677e-35	0.0367755	14667.2	149	0.161116	0.169595	0	1	14628.9	149	0.100762	TSR1	17	FLJ10534; KIAA1401;	NM_018128.4	GeneID:55720	17:2185926-2188447	2188320
21876	cg21907579	0.121646	349.716	349.716	1.0677e-35	0.0318849	8236.17	149	0.137882	0.0897613	0	1	8381.67	149	0.0851689	TBX5	12	HOS;	NM_080718.1	GeneID:6910	12:113330117-113332137	113330251
22376	cg22407458	0.114572	349.716	349.716	1.0677e-35	0.0392081	16604.6	149	0.162652	0.0753638	0	1	15904.7	149	0.102783	TCP11	6	D6S230E; KIAA0229; MGC111103;	NM_018679.2	GeneID:6954	6:35216605-35217470	35217099
22735	cg22777952	0.085157	349.716	349.716	1.0677e-35	0.026613	13690	149	0.115375	0.0585439	0	1	13789	149	0.0670724	FOXB1	15	FKH5; HFKH-5;	NM_012182.1	GeneID:27023	15:58083184-58086207	58083717
22998	cg23037403	0.169053	349.716	349.716	1.0677e-35	0.043382	19959.2	149	0.175602	0.125671	0	1	19854.4	149	0.110812	ZNF454	5	FLJ37444;	NM_182594.1	GeneID:285676	5:178300061-178301434	178300789
23194	cg23219570	0.251922	349.716	349.716	1.0677e-35	0.0468966	19469.8	149	0.212352	0.205025	0	1	19405.2	149	0.134704	FGF23	12	ADHR; HYPF; HPDR2; PHPTC;	NM_020638.2	GeneID:8074		4359154
23461	cg23506842	0.185466	349.716	349.716	1.0677e-35	0.0424942	26187.5	149	0.180557	0.142972	0	1	26642.7	149	0.116503	PTPN7	1	LPTP; HEPTP; PTPNI; BPTP-4; LC-PTP;	NM_002832.2	GeneID:5778		200397543
23946	cg23989635	0.121415	349.716	349.716	1.0677e-35	0.0301743	22591.8	149	0.143025	0.0912409	0	1	22148	149	0.0902851	CDH1	16	UVO; CDHE; ECAD; LCAM; Arc-1; CD324;	NM_004360.2	GeneID:999	16:67328348-67330000	67328704
24046	cg24092914	0.358451	349.716	349.716	1.0677e-35	0.0495618	7338.75	149	0.169885	0.308889	0	1	7788.44	149	0.113114	VHL	3	RCA1; VHL1; HRCA1;	NT_022517.17	GeneID:7428	3:10157841-10160111	10159877
24048	cg24098951	0.0690311	349.716	349.716	1.0677e-35	0.0249716	19986.9	149	0.108858	0.0440595	0	1	19616.3	149	0.0672676	LRP12	8	ST7; FLJ12929; DKFZp781F1053;	NM_013437.2	GeneID:29967	8:105669445-105671333	105670212
24087	cg24127989	0.10655	349.716	349.716	1.0677e-35	0.0349819	14837.7	149	0.155977	0.0715676	0	1	14857.8	149	0.0963094	IMPDH1	7	IMPD; IMPD1; sWSS2608; DKFZp781N0678;	NM_183243.1	GeneID:3614	7:127836635-127837886	127836744
24266	cg24330042	0.155498	349.716	349.716	1.0677e-35	0.0413439	8791.52	149	0.171529	0.114154	0	1	10231.2	149	0.144353	GSTT1	22		NM_000853.1	GeneID:2952	22:22713988-22714557	22714159
25031	cg25053900	0.154693	349.716	349.716	1.0677e-35	0.0402076	8092.35	149	0.18884	0.114486	0	1	8224.75	149	0.1252	ARX	X	ISSX; PRTS; MRX36; MRX43; MRX54; MRXS1;	NM_139058.1	GeneID:170302	X:24943461-24944792	24943811
25082	cg25097436	0.104023	349.716	349.716	1.0677e-35	0.0312013	13462.9	149	0.143512	0.072822	0	1	13367.7	149	0.0928512	RTN1	14	NSP; MGC133250;	NM_021136.2	GeneID:6252	14:59406238-59407558	59406725
25239	cg25242557	0.175892	349.716	349.716	1.0677e-35	0.0456517	42525.5	149	0.216322	0.13024	0	1	42402.5	149	0.135456	PAX6	11	AN; AN2; MGDA; WAGR; D11S812E; MGC17209;	NM_000280.2	GeneID:5080	11:31789223-31789894	31789840
25338	cg25358289	0.273191	349.716	349.716	1.0677e-35	0.0442967	10044.5	149	0.192622	0.228894	0	1	9934.97	149	0.124279	CD14	5		NM_000591.1	GeneID:929	5:139991494-139993011	139992912
25594	cg25596297	0.126574	349.716	349.716	1.0677e-35	0.0326206	5988.95	149	0.146802	0.0939531	0	1	6065.39	149	0.0940161	FLJ32447	2	MGC133159;	NM_153038.1	GeneID:151278	2:222871073-222872248	222871119
25705	cg25725843	0.182445	349.716	349.716	1.0677e-35	0.0382876	18098.1	149	0.158347	0.144157	0	1	18650	149	0.0962536	ST6GAL2	2	SIAT2; KIAA1877; ST6GalII;	NM_032528.1	GeneID:84620	2:106868671-106870745	106870601
25773	cg25802093	0.14296	349.716	349.716	1.0677e-35	0.0357898	13314.1	149	0.159796	0.107171	0	1	13236.6	149	0.0995488	SPAG6	10	pf16; MGC26276; Repro-SA-1; DKFZp434I153;	NM_012443.2	GeneID:9576	10:22673932-22675060	22674044
25916	cg25942450	0.115176	349.716	349.716	1.0677e-35	0.0300181	15024.2	149	0.134442	0.0851582	0	1	15356.8	149	0.0809476	TLX3	5	RNX; HOX11L2; MGC29804;	NM_021025.2	GeneID:30012	5:170667594-170672661	170668856
26161	cg26174752	0.167209	349.716	349.716	1.0677e-35	0.0441132	9448.46	149	0.20157	0.123095	0	1	9722.79	149	0.124297	GPR63	6	PSP24B; PSP24(beta);	NM_030784.1	GeneID:81491	6:97391242-97392702	97392669
26262	cg26267310	0.123879	349.716	349.716	1.0677e-35	0.0309094	18673.3	149	0.174002	0.0929696	0	1	18678.6	149	0.119864	DHRS10	19	retSDR3;	NM_016246.2	GeneID:51171	19:54032130-54032682	54032405
26567	cg26609631	0.111301	349.716	349.716	1.0677e-35	0.0395163	15082.4	149	0.167329	0.0717844	0	1	15538.3	149	0.0974471	GSH1	13	Gsh-1;	NM_145657.1	GeneID:219409	13:27263400-27265360	27264814
26808	cg26832142	0.087265	349.716	349.716	1.0677e-35	0.0255339	22247.8	149	0.113978	0.0617311	0	1	21681.7	149	0.0675779	PDE4B	1	DPDE4; PDEIVB; MGC126529; DKFZp686F2182;	NM_002600.2	GeneID:5142	1:66030397-66031906	66031029
27406	cg27472295	0.0917806	349.716	349.716	1.0677e-35	0.0278219	10200.4	149	0.120223	0.0639587	0	1	10276.8	149	0.0752516	TPBG	6	5T4; M6P1; 5T4-AG;	NM_006670.3	GeneID:7162	6:83129980-83132165	83130338
187	cg00174500	0.789652	-348.327	348.327	1.47001e-35	-0.0514731	11413.4	149	0.225483	0.841125	0	1	11094.6	149	0.140097	CMTM5	14	CKLFSF5; FLJ37521;	NM_138460.2	GeneID:116173		22916319
247	cg00226923	0.777125	-348.327	348.327	1.47001e-35	-0.0547459	27561.4	149	0.249268	0.831871	0	1	28042.8	149	0.155077	FGD2	6	ZFYVE4; MGC71330;	NM_173558.2	GeneID:221472		37080005
2877	cg02876062	0.844854	-348.327	348.327	1.47001e-35	-0.0475274	13230.6	149	0.217819	0.892381	0	1	13475.2	149	0.131623	FAM107B	10	C10orf45; FLJ45505; MGC11034; MGC90261;	NM_031453.2	GeneID:83641	10:14856124-14856711	14856660
3683	cg03665605	0.811966	-348.327	348.327	1.47001e-35	-0.047898	7292.84	149	0.206761	0.859864	0	1	7604.62	149	0.129944	ATP5J2	7	ATP5JL;	NM_004889.2	GeneID:9551	7:98901645-98903300	98902148
4041	cg03993463	0.85999	-348.327	348.327	1.47001e-35	-0.0402579	15882.1	149	0.186465	0.900247	0	1	15822.5	149	0.117214	KCNJ15	21	KIR1.3; KIR4.2; MGC13584;	NM_002243.3	GeneID:3772		38549141
5242	cg05221264	0.844162	-348.327	348.327	1.47001e-35	-0.0447754	12945	149	0.192512	0.888937	0	1	12957.1	149	0.11613	ELA2A	1	ELA1; PE-1;	NM_033440.1	GeneID:63036		15656100
7125	cg07125166	0.793802	-348.327	348.327	1.47001e-35	-0.0504057	10324.3	149	0.195638	0.844207	0	1	10459.6	149	0.122495	FBXW12	3	Fbw12; FBXO35; MGC120385; MGC120386; MGC120387;	NM_207102.1	GeneID:285231		48388617
7307	cg07327347	0.75023	-348.327	348.327	1.47001e-35	-0.0565527	13229.8	149	0.236554	0.806783	0	1	13326.1	149	0.153306	AQP8	16		NM_001169.2	GeneID:343		25135505
8264	cg08314660	0.884494	-348.327	348.327	1.47001e-35	-0.0371357	28185.9	149	0.167122	0.921629	0	1	28413.6	149	0.100762	PKP3	11		NM_007183.2	GeneID:11187	11:384143-384690	384199
8373	cg08424423	0.865871	-348.327	348.327	1.47001e-35	-0.0425101	13080.8	149	0.187523	0.908381	0	1	13161	149	0.113577	CDSN	6	S; HTSS; D6S586E;	NM_001264.3	GeneID:1041		31196167
12149	cg12215675	0.842779	-348.327	348.327	1.47001e-35	-0.0424701	15375.8	149	0.19024	0.885249	0	1	16224.9	149	0.117017	TTLL2	6	C6orf104; NYD-TSPG; dJ366N23.3;	NM_031949.3	GeneID:83887		167658584
13285	cg13350783	0.795224	-348.327	348.327	1.47001e-35	-0.0515374	14045.5	149	0.22153	0.846761	0	1	14264.5	149	0.134074	KRT13	17	K13; CK13; MGC3781;	NM_002274.2	GeneID:3860		36914880
13892	cg13928961	0.869442	-348.327	348.327	1.47001e-35	-0.0390381	8413.03	149	0.169609	0.90848	0	1	8504.1	149	0.10419	K6IRS3	12	KRT6IRS3; MGC129635; MGC129636;	NM_175068.2	GeneID:319101		51298276
14136	cg14162076	0.846154	-348.327	348.327	1.47001e-35	-0.0460902	18979.4	149	0.204236	0.892244	0	1	19279.7	149	0.120613	CLEC4D	12	MCL; Mpcl; CLEC-6; CLECSF8; MGC40078;	NM_080387.4	GeneID:338339	12:8556211-8556415	8556359
14365	cg14375111	0.774285	-348.327	348.327	1.47001e-35	-0.0564619	15577.9	149	0.22689	0.830746	0	1	15449.2	149	0.139797	TMEM43	3	MGC3222; DKFZp586G1919;	NM_024334.1	GeneID:79188		14140187
14552	cg14547335	0.846838	-348.327	348.327	1.47001e-35	-0.0472301	22375	149	0.208077	0.894068	0	1	22552	149	0.128209	ATP2B2	3	PMCA2;	NM_001683.2	GeneID:491	3:10466013-10466250	10466247
14946	cg14934821	0.788553	-348.327	348.327	1.47001e-35	-0.054733	8292.67	149	0.237721	0.843286	0	1	8106.71	149	0.145276	GPSM1	9	AGS3; DKFZP727I051;	NM_015597.2	GeneID:26086	9:138348614-138348948	138348641
14965	cg14959707	0.789752	-348.327	348.327	1.47001e-35	-0.0564836	15732.1	149	0.244937	0.846236	0	1	16180.4	149	0.150906	ZC3H7A	16	ZC3H7; HSPC055; ZC3HDC7; FLJ10027; FLJ20318;	NM_014153.2	GeneID:29066	16:11783829-11784227	11783892
16439	cg16359129	0.831359	-348.327	348.327	1.47001e-35	-0.0453225	8767.48	149	0.204609	0.876682	0	1	8759.73	149	0.128267	C1orf111	1	HSD20; RP11-565P22.3;	NM_182581.1	GeneID:284680		160614376
16529	cg16462075	0.803585	-348.327	348.327	1.47001e-35	-0.0489547	12569.5	149	0.231684	0.85254	0	1	12770.4	149	0.141394	MUC3B	7		XM_168578.6	GeneID:57876		100382156
18169	cg18152830	0.782549	-348.327	348.327	1.47001e-35	-0.0550286	15355	149	0.249483	0.837577	0	1	15731.9	149	0.151498	TNFRSF13B	17	TACI; CD267; MGC39952; MGC133214; TNFRSF14B;	NM_012452.2	GeneID:23495		16815854
18250	cg18241647	0.776715	-348.327	348.327	1.47001e-35	-0.0523196	11203.8	149	0.22023	0.829034	0	1	11431.9	149	0.134046	WFDC12	20	WAP2; SWAM2; C20orf122; dJ211D12.4;	NM_080869.1	GeneID:128488		43186761
18393	cg18389810	0.792586	-348.327	348.327	1.47001e-35	-0.0515416	5460.4	149	0.228987	0.844128	0	1	5545.09	149	0.142114	C14orf8	14		NM_173846.3	GeneID:122664	14:20568722-20568923	20568727
19581	cg19584957	0.907107	-348.327	348.327	1.47001e-35	-0.0407521	27096.9	149	0.185995	0.947859	0	1	27388.8	149	0.113748	TTLL10	1	TTLL5; FLJ36119; FLJ42131; RP5-902P8.1;	NM_153254.1	GeneID:254173	1:1104363-1104588	1104442
19782	cg19798224	0.763676	-348.327	348.327	1.47001e-35	-0.055199	19017	149	0.239034	0.818875	0	1	19208.1	149	0.148	C14orf68	14	HDMCP; HMFN1655;	NM_207117.2	GeneID:283600		99859262
19850	cg19859270	0.794664	-348.327	348.327	1.47001e-35	-0.0528347	6799.03	149	0.244976	0.847499	0	1	6851.91	149	0.151381	GPR15	3	MGC126828; MGC126830;	NM_005290.1	GeneID:2838		99733984
19994	cg20015855	0.858793	-348.327	348.327	1.47001e-35	-0.0428113	11065.1	149	0.193236	0.901604	0	1	11332.4	149	0.115873	CORO2B	15	CLIPINC; KIAA0925;	NM_006091.1	GeneID:10391	15:66724510-66724769	66724616
20132	cg20154346	0.767834	-348.327	348.327	1.47001e-35	-0.0535496	7631.19	149	0.226632	0.821383	0	1	7554.15	149	0.139151	RAI2	X		NM_021785.2	GeneID:10742		17731018
20890	cg20931907	0.884476	-348.327	348.327	1.47001e-35	-0.0381784	14507	149	0.1658	0.922654	0	1	14679.1	149	0.103187	LOC340602	X	MGC47837;	NM_203407.1	GeneID:340602	X:51166104-51167780	51166482
21469	cg21489722	0.822233	-348.327	348.327	1.47001e-35	-0.0522339	15082.6	149	0.231344	0.874467	0	1	15685.3	149	0.139909	FAM9B	X	FLJ40182;	NM_205849.1	GeneID:171483	X:8961772-8961973	8961881
21629	cg21633698	0.820036	-348.327	348.327	1.47001e-35	-0.0503922	13310.1	149	0.238531	0.870429	0	1	13366	149	0.145712	THY1	11	CD90;	NM_006288.2	GeneID:7070		118799744
21987	cg22021786	0.832668	-348.327	348.327	1.47001e-35	-0.0447204	11611.5	149	0.209087	0.877388	0	1	11942.1	149	0.129633	WFDC8	20	WAP8; C20orf170; dJ461P17.1;	NM_181510.1	GeneID:90199		43640702
22521	cg22552966	0.891857	-348.327	348.327	1.47001e-35	-0.0421628	23897.9	149	0.185521	0.93402	0	1	24805.8	149	0.114307	FLJ31196	17	MATE2;	NM_152908.2	GeneID:146802		19561187
23716	cg23753610	0.908076	-348.327	348.327	1.47001e-35	-0.0318006	14420.1	149	0.139581	0.939877	0	1	14675	149	0.0795403	DNAHL1	17	FLJ40457;	NM_173628.1	GeneID:284176		74079425
23728	cg23767977	0.837349	-348.327	348.327	1.47001e-35	-0.0444189	15653.9	149	0.200303	0.881768	0	1	15707.1	149	0.124076	KRT6IRS	12	K6IRS1; KRT6IRS1; MGC119390; MGC119391;	NM_033448.1	GeneID:112802		51233732
23763	cg23815000	0.780495	-348.327	348.327	1.47001e-35	-0.0517258	13107.4	149	0.233268	0.832221	0	1	13253.7	149	0.139857	LCN1	9	TP; PMFA; VEGP; MGC71975;	NM_002297.2	GeneID:3933		137552833
24373	cg24423088	0.872545	-348.327	348.327	1.47001e-35	-0.0380187	12542.2	149	0.169441	0.910563	0	1	12973	149	0.104705	KRTAP8-1	21	KAP8.1;	NM_175857.3	GeneID:337879		31107236
24394	cg24443136	0.864252	-348.327	348.327	1.47001e-35	-0.0479786	14275	149	0.21456	0.91223	0	1	14748.1	149	0.128202	ATP2B3	X	PMCA3;	NM_021949.2	GeneID:492		152454781
24836	cg24870391	0.815994	-348.327	348.327	1.47001e-35	-0.0481144	15526.6	149	0.218323	0.864108	0	1	15654.9	149	0.13498	CCL11	17	SCYA11; MGC22554;	NM_002986.2	GeneID:6356		29636788
24888	cg24919884	0.788433	-348.327	348.327	1.47001e-35	-0.0556219	7874.08	149	0.23894	0.844055	0	1	7717.08	149	0.145905	ARHGEF16	1	NBR; GEF16;	NM_014448.2	GeneID:27237		3370148
25020	cg25042226	0.86798	-348.327	348.327	1.47001e-35	-0.0427461	14371.7	149	0.185622	0.910726	0	1	14512	149	0.1149	PAX8	2		NM_013951.2	GeneID:7849	2:113752884-113753146	113753041
26484	cg26521448	0.844628	-348.327	348.327	1.47001e-35	-0.0582725	21941.1	149	0.262368	0.902901	0	1	22616.7	149	0.158776	ZC3H7A	16	ZC3H7; HSPC055; ZC3HDC7; FLJ10027; FLJ20318;	NM_014153.2	GeneID:29066	16:11783829-11784227	11783927
26705	cg26750319	0.901065	-348.327	348.327	1.47001e-35	-0.041338	15751.4	149	0.167078	0.942403	0	1	16052.6	149	0.100342	KCNQ1	11	LQT; RWS; WRS; LQT1; ATFB1; KCNA8; KCNA9; Kv1.9; Kv7.1; KVLQT1;	NT_009237.17	GeneID:3784	11:2550370-2550883	2550536
22590	cg22627427	0.839372	-347.125	347.125	1.93861e-35	-0.0429177	9607.94	149	0.197156	0.88229	0	1	9835.69	149	0.119323	C11orf9	11	KIAA0954; MGC10781; BC269730_4;	NM_013279.1	GeneID:745		61279074
12557	cg12619162	0.802236	-344.09	344.09	3.8996e-35	-0.0483332	11719.2	149	0.249593	0.850569	0	1	11452.3	149	0.151317	FXYD4	10	CHIF;	NM_173160.2	GeneID:53828		43187161
15111	cg15113803	0.813028	-341.951	341.951	6.38102e-35	-0.0466294	18041.3	149	0.212525	0.859657	0	1	18277.9	149	0.132831	RHO	3	RP4; OPN2;	NM_000539.2	GeneID:6010		130729809
21623	cg21627181	0.784498	-341.51	341.51	7.06301e-35	-0.0506499	7929.07	149	0.228915	0.835148	0	1	7983.92	149	0.139748	SLC17A4	6	KAIA2138; MGC129623;	NM_005495.1	GeneID:10050		25862169
11393	cg11465372	0.800777	-340.865	340.865	8.19332e-35	-0.0483326	15365.1	149	0.211048	0.849109	0	1	15540.6	149	0.128335	KRT2B	12	KRT2P;	NM_015848.1	GeneID:51350		51457458
4278	cg04256470	0.872974	-340.707	340.707	8.49787e-35	-0.0371034	13652.8	149	0.168759	0.910077	0	1	14164.6	149	0.104343	CORT	1	CST-14; CST-17; CST-29;	NM_001302.3	GeneID:1325	1:10432949-10433150	10433052
8378	cg08430598	0.84069	-337.713	337.713	1.69328e-34	-0.0421801	14266.4	149	0.167048	0.88287	0	1	14535.5	149	0.099763	CST1	20		NM_001898.2	GeneID:1469		23679367
13172	cg13259290	0.7527	-337.158	337.158	1.92393e-34	-0.0544891	16989.7	149	0.236696	0.80719	0	1	17225.2	149	0.145541	CSF2	5	GMCSF; MGC131935;	NM_000758.2	GeneID:1437		131436281
10291	cg10365880	0.849061	-337.139	337.139	1.93219e-34	-0.0408269	17041.3	149	0.182368	0.889888	0	1	16867.8	149	0.115544	PKD2L1	10	PCL; PKDL; PKD2L;	NM_016112.2	GeneID:9033		102079671
25918	cg25943276	0.796122	-336.94	336.94	2.02307e-34	-0.0487289	11161.8	149	0.210107	0.844851	0	1	11251.4	149	0.12893	C11orf39	11	FLJ45436;	NM_207432.1	GeneID:399980	11:131038328-131038553	131038494
17709	cg17703324	0.825048	-336.733	336.733	2.12158e-34	-0.0445141	7532.88	149	0.207395	0.869562	0	1	7741.38	149	0.126995	OPTC	1	OPT;	NM_014359.3	GeneID:26254		201729088
23707	cg23749046	0.774243	-334.311	334.311	3.7057e-34	-0.051521	6924.64	149	0.236029	0.825764	0	1	6823.28	149	0.143761	GPR61	1	BALGR; GPCR3;	NM_031936.3	GeneID:83873		109884447
10329	cg10409560	0.767523	-334.021	334.021	3.9615e-34	-0.052375	7555.2	149	0.224471	0.819898	0	1	7636.31	149	0.138729	FLJ23657	4		NM_178497.2	GeneID:152816		76700323
4443	cg04415689	0.825264	-328.696	328.696	1.3503e-33	-0.0439994	15063.4	149	0.198712	0.869263	0	1	15119.5	149	0.124433	TMEM16G	2	NGEP; D-TMPP; IPCA-5; PCANAP5; PCANAP5L;	NM_001001666.1	GeneID:50636		241776923
23735	cg23773532	0.793639	-327.364	327.364	1.83468e-33	-0.0484357	11607.1	149	0.232725	0.842075	0	1	11690.1	149	0.142709	GPRC5D	12		NM_018654.1	GeneID:55507		12994483
21943	cg21970438	0.829212	-325.844	325.844	2.60375e-33	-0.0432377	9356.38	149	0.182007	0.87245	0	1	9492.9	149	0.109121	TTLL2	6	C6orf104; NYD-TSPG; dJ366N23.3;	NM_031949.3	GeneID:83887		167658267
16064	cg15983005	0.799138	-325.8	325.8	2.63033e-33	-0.0475698	9097.71	149	0.208489	0.846708	0	1	9168.51	149	0.127801	KRTHA3A	17	HA3I; Ha-3I; Krt1-3; hHa3-I;	NM_004138.2	GeneID:3883		36760464
14100	cg14127336	0.752218	-325.395	325.395	2.88742e-33	-0.0536611	26570.4	149	0.24438	0.805879	0	1	26943.7	149	0.152713	TCL1A	14	TCL1;	NM_021966.1	GeneID:8115	14:95249952-95250699	95250072
6800	cg06811800	0.80474	-321.911	321.911	6.44021e-33	-0.0465317	6394.91	149	0.194369	0.851272	0	1	6482.57	149	0.113227	ATP4B	13	ATP6B;	NM_000705.2	GeneID:496	13:113359799-113360176	113360106
8772	cg08815403	0.757459	-321.194	321.194	7.59661e-33	-0.052703	7538.45	149	0.2299	0.810162	0	1	7541.71	149	0.141304	HSD17B13	4	SCDR9; NIIL497; HMFN0376;	NM_178135.2	GeneID:345275		88463166
15993	cg15916061	0.775803	-320.468	320.468	8.9778e-33	-0.0503311	14154.3	149	0.238855	0.826134	0	1	14424.9	149	0.146964	SLC17A4	6	KAIA2138; MGC129623;	NM_005495.1	GeneID:10050		25862198
6859	cg06862644	0.835387	-320.332	320.332	9.26382e-33	-0.0419778	15826.9	149	0.183071	0.877365	0	1	16008.5	149	0.113371	SPATA22	17	NYD-SP20;	NM_032598.2	GeneID:84690	17:3321498-3322570	3322219
25068	cg25087423	0.740219	-316.866	316.866	2.05755e-32	-0.0544307	12132.5	149	0.23291	0.79465	0	1	12408.7	149	0.144628	BLR1	11	CD185; CXCR5; MDR15; MGC117347;	NM_001716.2	GeneID:643	11:118259679-118259945	118259745
7416	cg07443748	0.757583	-314.228	314.228	3.77772e-32	-0.0521613	13553.4	149	0.22868	0.809744	0	1	13494.5	149	0.139915	CESK1	22		NM_014406.4	GeneID:150160		15453594
26779	cg26808784	0.879585	-313.918	313.918	4.05705e-32	-0.0346769	9626.45	149	0.149915	0.914262	0	1	9401.34	149	0.0952825	H19	11	ASM; BWS; ASM1; MGC4485; PRO2605; D11S813E;	NT_009237.17	GeneID:283120	11:1973888-1974871	1974059
1434	cg01423840	0.773968	-310.439	310.439	9.03774e-32	-0.0498406	7121.61	149	0.225509	0.823809	0	1	7293.69	149	0.136879	FATE1	X	FATE;	NM_033085.2	GeneID:89885		150634869
23096	cg23128056	0.743552	-307.89	307.89	1.62555e-31	-0.0533363	13260.3	149	0.234454	0.796888	0	1	13392.7	149	0.142515	KRT15	17	K15; CK15; K1CO;	NM_002275.2	GeneID:3866		36928152
5121	cg05078019	0.805732	-306.5	306.5	2.23893e-31	-0.0453691	16480.3	149	0.202211	0.851101	0	1	16689.4	149	0.123251	PDE6B	4	PDEB; CSNB3;	NM_000283.1	GeneID:5158	4:609359-609999	609392
8594	cg08649013	0.756473	-301.395	301.395	7.2527e-31	-0.0513123	8142.03	149	0.222433	0.807785	0	1	8340.25	149	0.134786	SLC2A9	4	GLUT9; GLUTX;	NM_020041.2	GeneID:56606		9651296
10043	cg10127415	0.765909	-300.917	300.917	8.09636e-31	-0.0501358	10910.8	149	0.227699	0.816044	0	1	11398.2	149	0.142635	MAGEB6	X	MAGE-B6; MAGEB6A; FLJ40242;	NM_173523.2	GeneID:158809		26120444
16743	cg16698623	0.802879	-299.965	299.965	1.00816e-30	-0.0453142	18103.6	149	0.211071	0.848193	0	1	18347.1	149	0.131871	MGMT	10		NT_008818.15	GeneID:4255	10:131302456-131302963	131302958
9652	cg09722555	0.843465	-299.947	299.947	1.01233e-30	-0.0395602	16893.9	149	0.180022	0.883025	0	1	16406.4	149	0.116902	CCL27	9	ALP; ILC; CTAK; CTACK; PESKY; ESKINE; SCYA27;	NM_006664.2	GeneID:10850		34652282
5618	cg05615487	0.737557	-299.835	299.835	1.03882e-30	-0.053367	9729.67	149	0.228215	0.790924	0	1	9826.55	149	0.139458	ACR	22		NM_001097.1	GeneID:49		49523273
22266	cg22294577	0.834915	-299.585	299.585	1.10017e-30	-0.0407932	18192.1	149	0.183586	0.875708	0	1	18014.7	149	0.113008	SLC26A3	7	CLD; DRA;	NM_000111.1	GeneID:1811		107231964
3871	cg03842617	0.830341	-299.246	299.246	1.18962e-30	-0.0414331	24697.1	149	0.192915	0.871774	0	1	24663.7	149	0.121242	NOS3	7	eNOS; ECNOS; NOS III;	NM_000603.3	GeneID:4846		150319489
11753	cg11811840	0.778705	-297.816	297.816	1.65345e-30	-0.0483068	8263.6	149	0.204016	0.827012	0	1	8285.07	149	0.125859	UGT1A1	2	GNT1; UGT1; UDPGT; UGT1A; UGT1*1; HUG-BR1;	NM_000463.2	GeneID:54658		234333905
14123	cg14153740	0.78309	-297.288	297.288	1.86741e-30	-0.047711	7012.76	149	0.204326	0.830801	0	1	6955.73	149	0.123944	TRY1	7	TRYX3; UNQ2540; FLJ16649; MGC35022;	NM_001001317.1	GeneID:136541		141604179
14071	cg14102807	0.752803	-296.208	296.208	2.39464e-30	-0.0513251	16566.3	149	0.236884	0.804128	0	1	17106	149	0.146701	CD19	16	B4; MGC12802;	NM_001770.3	GeneID:930		28851178
5796	cg05800321	0.837928	-294.823	294.823	3.29412e-30	-0.0400582	17977.1	149	0.197438	0.877986	0	1	18074.4	149	0.120219	LY6D	8	E48;	NM_003695.2	GeneID:8581	8:143864661-143864861	143864801
474	cg00463848	0.757564	-294.367	294.367	3.65873e-30	-0.0506192	4060.39	149	0.212758	0.808183	0	1	4028.81	149	0.133509	KRT2A	12	KRTE; KRT2E; MGC116967; MGC116968;	NM_000423.2	GeneID:3849		51332372
628	cg00613255	0.795909	-294.318	294.318	3.70016e-30	-0.0458356	21296.2	149	0.186686	0.841745	0	1	21303.3	149	0.117726	INS	11		NM_000207.1	GeneID:3630		2138952
5910	cg05921324	0.777918	-294.262	294.262	3.74766e-30	-0.0481345	14681.9	149	0.220773	0.826052	0	1	14628.1	149	0.135528	APOA4	11		NM_000482.3	GeneID:337		116199324
10250	cg10321723	0.873379	-294.071	294.071	3.91625e-30	-0.0346459	13021	149	0.156054	0.908025	0	1	13052.1	149	0.0962775	PDZK1	1	CAP70; CLAMP; PDZD1;	NM_002614.3	GeneID:5174		144439119
1160	cg01144251	0.725724	-293.058	293.058	4.94481e-30	-0.0540826	14073.2	149	0.207075	0.779806	0	1	14078.5	149	0.129272	KLK9	19	KLK8; KLKL3; KLK-L3;	NM_012315.1	GeneID:284366		56205958
24403	cg24447890	0.880179	-292.545	292.545	5.56532e-30	-0.0334901	22261.2	149	0.147733	0.913669	0	1	22579.9	149	0.0890662	LMAN1L	15	ERGL; ERGIC-53L;	NM_021819.2	GeneID:79748		72892197
3359	cg03343942	0.802654	-291.46	291.46	7.1448e-30	-0.0447387	13472.1	149	0.189362	0.847393	0	1	13660.5	149	0.117173	SLC39A5	12	ZIP5; LZT-Hs7; MGC34778;	NM_173596.1	GeneID:283375		54911376
5699	cg05700681	0.782694	-290.018	290.018	9.95887e-30	-0.0472154	7525.33	149	0.236336	0.829909	0	1	7621.7	149	0.146025	CCL22	16	MDC; ABCD-1; SCYA22; STCP-1; DC/B-CK; MGC34554; A-152E5.1;	NM_002990.3	GeneID:6367		55950265
13095	cg13180098	0.731338	-289.928	289.928	1.01683e-29	-0.053211	5889.18	149	0.228898	0.784549	0	1	5791.43	149	0.140353	RHO	3	RP4; OPN2;	NM_000539.2	GeneID:6010		130729613
3285	cg03270204	0.770233	-288.834	288.834	1.30798e-29	-0.0486625	9155.64	149	0.228793	0.818896	0	1	9051.48	149	0.142387	DDR1	6	CAK; DDR; NEP; PTK3; RTK6; TRKE; CD167; EDDR1; MCK10; NTRK4; PTK3A;	NM_001954.3	GeneID:780		30959617
14397	cg14404298	0.731497	-287.935	287.935	1.60861e-29	-0.0530241	8027.32	149	0.22753	0.784521	0	1	7913.8	149	0.139636	CYP8B1	3	CP8B; CYP12;	NM_004391.1	GeneID:1582		42894029
19708	cg19728577	0.797721	-286.039	286.039	2.48943e-29	-0.045001	13619.1	149	0.208574	0.842722	0	1	13220.8	149	0.128656	GUCA2B	1	UGN; GCAP-II;	NM_007102.1	GeneID:2981		42391750
15226	cg15233681	0.801643	-285.38	285.38	2.89721e-29	-0.044441	5793.91	149	0.181812	0.846084	0	1	5559.17	149	0.11381	IL1R1	2	P80; IL1R; IL1RA; CD121A; D2S1473; IL-1R-alpha;	NM_000877.2	GeneID:3554		102137034
7412	cg07440877	0.846753	-283.888	283.888	4.08489e-29	-0.0380943	18450.2	149	0.182276	0.884847	0	1	18551.9	149	0.118111	FLJ46358	13		NM_207439.2	GeneID:400110		23421079
1444	cg01429391	0.824582	-283.745	283.745	4.22211e-29	-0.0412352	12610.9	149	0.212714	0.865817	0	1	12747.2	149	0.127889	MYH7	14	CMH1; MPD1; CMD1S; MYHCB; MGC138376; MGC138378;	NM_000257.1	GeneID:4625		22974770
2164	cg02148642	0.756003	-283.002	283.002	5.00991e-29	-0.0498807	7614.27	149	0.236404	0.805884	0	1	7536.31	149	0.14517	RGPD5	2	RGP5; BS-63; DKFZp686I1842;	NM_032260.2	GeneID:84220		109906875
8774	cg08816023	0.79085	-282.794	282.794	5.25557e-29	-0.0456433	17726.2	149	0.222396	0.836494	0	1	17824.5	149	0.134825	FGF1	5	AFGF; ECGF; FGFA; ECGFA; ECGFB; HBGF1; GLIO703; ECGF-beta; FGF-alpha;	NM_033136.1	GeneID:2246		142045723
2869	cg02868123	0.793959	-282.453	282.453	5.68447e-29	-0.045221	26071	149	0.207769	0.839179	0	1	25973.7	149	0.128708	REGL	2		XR_000606.1	GeneID:5969		79236421
4856	cg04797496	0.74261	-281.847	281.847	6.53582e-29	-0.0512924	8027.29	149	0.236069	0.793903	0	1	7919.78	149	0.145267	PCDH12	5	VECAD2; VE-cadherin-2;	NM_016580.2	GeneID:51294		141319270
25416	cg25426302	0.783614	-281.71	281.71	6.74528e-29	-0.046468	7510.9	149	0.191078	0.830082	0	1	7579.97	149	0.119841	PRRT1	6	NG5; C6orf31;	NM_030651.2	GeneID:80863	6:32228589-32230636	32228804
8220	cg08268099	0.736766	-281.051	281.051	7.85055e-29	-0.0518616	9854.99	149	0.218203	0.788627	0	1	10033	149	0.132843	OLFM1	9	AMY; NOE1; OlfA; NOELIN; NOELIN1; NOELIN1_V1; NOELIN1_V2; NOELIN1_V4;	NM_014279.2	GeneID:10439		137106405
24748	cg24789424	0.839449	-281.014	281.014	7.91845e-29	-0.0389621	8802.23	149	0.177582	0.878412	0	1	8846.17	149	0.105722	BDH	3	MGC2723; MGC4347; MGC9788;	NM_203315.1	GeneID:622		198784540
19186	cg19196684	0.847315	-280.567	280.567	8.77526e-29	-0.0378001	26046.8	149	0.159377	0.885116	0	1	26256.7	149	0.0950984	SLC1A7	1	AAAT; EAAT5;	NM_006671.3	GeneID:6512		53380625
21933	cg21960110	0.749989	-280.567	280.567	8.77526e-29	-0.0503572	9645.72	149	0.236739	0.800346	0	1	9625.02	149	0.144227	HBZ	16		NM_005332.2	GeneID:3050		142482
12004	cg12061127	0.812869	-280.171	280.171	9.61302e-29	-0.0425766	10663.5	149	0.192353	0.855446	0	1	10844.4	149	0.113567	WFDC9	20	WAP9; dJ688G8.2;	NM_147198.2	GeneID:259240		43693326
6009	cg06037693	0.756104	-278.965	278.965	1.26923e-28	-0.0495291	16722.5	149	0.198979	0.805633	0	1	17108	149	0.120462	RUNX3	1	AML2; CBFA3; PEBP2aC;	NM_004350.1	GeneID:864		25164659
13073	cg13156121	0.809836	-278.743	278.743	1.33567e-28	-0.0428794	16132.2	149	0.183447	0.852715	0	1	16209.9	149	0.107482	TEPP	16	MGC129930; MGC129931;	NM_199456.1	GeneID:374739		56567615
21936	cg21964481	0.868963	-278.545	278.545	1.39804e-28	-0.0344654	18444.3	149	0.155008	0.903429	0	1	18651	149	0.0996688	SLC34A3	9	HHRH; NPTIIc; FLJ38680;	NM_080877.1	GeneID:142680		139245517
11368	cg11435943	0.748915	-278.127	278.127	1.53911e-28	-0.0502692	7744.4	149	0.232486	0.799184	0	1	7810.55	149	0.142731	SERPINB12	18	YUKOPIN; MGC119247;	NM_080474.1	GeneID:89777		59373667
2280	cg02248486	0.682891	-278.113	278.113	1.54405e-28	-0.0568978	11145	149	0.199509	0.739788	0	1	11395	149	0.134308	HOXA5	7	HOX1; HOX1C; HOX1.3; MGC9376;	NM_019102.2	GeneID:3202	7:27147983-27152159	27149721
299	cg00280814	0.76526	-277.652	277.652	1.71724e-28	-0.0483562	11426.7	149	0.228899	0.813616	0	1	11530.8	149	0.138887	FLJ31568	22		NM_152509.1	GeneID:150244		22075389
17801	cg17778120	0.811457	-277.496	277.496	1.78e-28	-0.0425714	7557.66	149	0.187275	0.854028	0	1	7622.74	149	0.111742	RBP2	3	CRBP2; RBPC2; CRBPII; CRABP-II;	NM_004164.2	GeneID:5948		140678009
21343	cg21367957	0.849462	-276.538	276.538	2.21927e-28	-0.0372353	19397.1	149	0.158602	0.886698	0	1	19263.1	149	0.0994086	F10	13	FX; FXA;	NM_000504.2	GeneID:2159		112824253
3020	cg03003745	0.790331	-276.487	276.487	2.24559e-28	-0.0452216	15896.4	149	0.206117	0.835553	0	1	16065.5	149	0.130457	UNQ473	19	VCC1;	NM_198477.1	GeneID:284340		47640007
23980	cg24027679	0.838728	-276.217	276.217	2.38963e-28	-0.0387487	7098.14	149	0.164007	0.877476	0	1	7139.83	149	0.100029	SLC2A7	1	GLUT7;	NM_207420.1	GeneID:155184		9009208
5230	cg05208153	0.809273	-275.172	275.172	3.03948e-28	-0.0426932	23986	149	0.206689	0.851967	0	1	24152.3	149	0.127001	C9orf24	9	CBE1; MGC32921; MGC33614; NYD-SP22; bA573M23.4;	NM_147168.1	GeneID:84688		34388637
20454	cg20500126	0.792747	-274.516	274.516	3.53492e-28	-0.0447691	5256.51	149	0.191826	0.837516	0	1	5292.74	149	0.124578	ITGAE	17	CD103; HUMINAE;	NM_002208.3	GeneID:3682		3661007
20684	cg20732137	0.78936	-273.997	273.997	3.98364e-28	-0.0451531	14305.5	149	0.179867	0.834513	0	1	14318.4	149	0.113249	GMEB2	20	PIF79; P79PIF; KIAA1269;	NM_012384.2	GeneID:26205		61721671
26249	cg26259363	0.743746	-273.531	273.531	4.43517e-28	-0.0504433	5972.02	149	0.218348	0.794189	0	1	6021.41	149	0.134282	DES	2	CSM1; CSM2; CMD1I; FLJ12025; FLJ39719; FLJ41013; FLJ41793;	NM_001927.3	GeneID:1674		219990525
9966	cg10052840	0.732375	-273.365	273.365	4.60808e-28	-0.051646	21362.9	149	0.227163	0.784021	0	1	21475.5	149	0.144195	SEMA6B	19	SEMAN; semaZ; SEMA-VIB; Sema VIb; SEM-SEMA-Y;	NM_020241.2	GeneID:10501	19:4508934-4509159	4509119
27539	cg27622610	0.741823	-273.017	273.017	4.99183e-28	-0.050606	7283.15	149	0.225718	0.792429	0	1	7093.54	149	0.138078	OR1G1	17	OR1G2; OR17-130; OR17-209;	NM_003555.1	GeneID:8390		2976935
6911	cg06917325	0.727067	-271.637	271.637	6.86009e-28	-0.0520462	10348.3	149	0.223467	0.779113	0	1	10622.4	149	0.138205	SLC22A8	11	OAT3; MGC24086;	NM_004254.2	GeneID:9376		62539699
15144	cg15149645	0.847627	-271.268	271.268	7.46861e-28	-0.0371678	6886.38	149	0.150022	0.884794	0	1	6968.24	149	0.0873662	P8	16	COM1;	NM_012385.1	GeneID:26471		28458120
13550	cg13614083	0.696646	-271.085	271.085	7.78951e-28	-0.0549691	4902.85	149	0.208013	0.751615	0	1	4792.51	149	0.133333	KCNAB2	1	AKR6A5; KCNA2B; HKvbeta2; KV-BETA-2; HKvbeta2.1; HKvbeta2.2;	NM_003636.2	GeneID:8514	1:6008424-6008691	6008459
5011	cg04968426	0.86418	-271.062	271.062	7.83087e-28	-0.0347438	10482.6	149	0.152805	0.898924	0	1	10857	149	0.0924998	PPP1R14D	15	GBPI-1; FLJ20251; MGC119014; MGC119016; CPI17-like;	NM_017726.6	GeneID:54866		38908003
16717	cg16660041	0.753864	-271.043	271.043	7.86502e-28	-0.0491074	7281.28	149	0.224248	0.802972	0	1	7448.38	149	0.136545	IQCF1	3	FLJ27508; MGC39725;	NM_152397.1	GeneID:132141		51913470
17417	cg17391877	0.798762	-270.991	270.991	7.95903e-28	-0.0437378	10287.2	149	0.191776	0.8425	0	1	9948.39	149	0.116171	PGC	6		NM_002630.1	GeneID:5225		41822160
14705	cg14704941	0.820361	-270.853	270.853	8.21656e-28	-0.0409095	6223.31	149	0.190322	0.861271	0	1	6158.97	149	0.12009	CSRP3	11	CLP; MLP; CRP3; LMO4; CMD1M; MGC14488; MGC61993;	NM_003476.2	GeneID:8048		19181235
4264	cg04237003	0.746702	-269.026	269.026	1.25138e-27	-0.0497276	14996.3	149	0.21931	0.79643	0	1	15133.3	149	0.134112	C11orf9	11	KIAA0954; MGC10781; BC269730_4;	NM_013279.1	GeneID:745		61278578
4617	cg04567009	0.822892	-268.723	268.723	1.34187e-27	-0.0404236	15823.5	149	0.179164	0.863316	0	1	14791	149	0.111922	FCGR3B	1	CD16; FCG3; CD16b; FCGR3;	NM_000570.2	GeneID:2215		159867393
5975	cg05985767	0.825975	-266.917	266.917	2.0339e-27	-0.0398862	8365.44	149	0.174541	0.865862	0	1	8427.56	149	0.108858	ANPEP	15	CD13; LAP1; PEPN; gp150;	NM_001150.1	GeneID:290	15:88150397-88150795	88150515
7278	cg07297178	0.841216	-266.277	266.277	2.35641e-27	-0.0377507	13259.7	149	0.169463	0.878967	0	1	13431.6	149	0.109759	CEACAM7	19	CEA; CGM2;	NM_006890.1	GeneID:1087		46884924
26622	cg26657648	0.75438	-266.277	266.277	2.35641e-27	-0.0486483	4932.96	149	0.223378	0.803028	0	1	4873.77	149	0.137089	IL1R1	2	P80; IL1R; IL1RA; CD121A; D2S1473; IL-1R-alpha;	NM_000877.2	GeneID:3554		102136143
13327	cg13397379	0.818269	-266.103	266.103	2.45279e-27	-0.0408558	12726.2	149	0.188827	0.859125	0	1	12510.2	149	0.120939	OR2C3	1	OR2C4; OR2C5P; OST742;	NM_198074.3	GeneID:81472		245763251
21578	cg21591452	0.919954	-266.09	266.09	2.46014e-27	-0.025763	23261.6	149	0.11097	0.945717	0	1	23487	149	0.0685792	TMEM105	17	FLJ38792;	NM_178520.2	GeneID:284186	17:76919186-76919387	76919223
23530	cg23580945	0.747745	-265.353	265.353	2.91508e-27	-0.0492948	12794	149	0.215267	0.79704	0	1	12908.3	149	0.135219	FLJ43826	17		NM_198502.1	GeneID:342666		34439867
15751	cg15727249	0.697571	-264.506	264.506	3.54332e-27	-0.0542489	7291.6	149	0.216283	0.75182	0	1	7236.24	149	0.134768	APOA4	11		NM_000482.3	GeneID:337		116198625
14621	cg14615807	0.798429	-263.557	263.557	4.40829e-27	-0.0432208	13864.1	149	0.185647	0.84165	0	1	13948.6	149	0.108763	BSND	1	BART; MGC119283; MGC119284; MGC119285;	NM_057176.2	GeneID:7809		55236761
26670	cg26709720	0.756098	-263.372	263.372	4.60087e-27	-0.0482062	4494.09	149	0.209601	0.804304	0	1	4409.08	149	0.130977	B3GALT5	21	B3T5; GLCT5; B3GalTx; B3GalT-V; beta3Gal-T5;	NM_033170.1	GeneID:10317		39949830
20059	cg20082641	0.830941	-262.673	262.673	5.40431e-27	-0.0389212	6832.65	149	0.182546	0.869862	0	1	6996.92	149	0.117773	PAQR5	15	MPRG; FLJ20190;	NM_017705.2	GeneID:54852	15:67377209-67377413	67377309
12359	cg12435792	0.786369	-262.512	262.512	5.60751e-27	-0.0446218	17992.2	149	0.190023	0.830991	0	1	18253.4	149	0.119	PDE6B	4	PDEB; CSNB3;	NM_000283.1	GeneID:5158	4:609359-609999	609375
16917	cg16879596	0.762719	-262.219	262.219	5.9986e-27	-0.0473645	12862	149	0.219171	0.810084	0	1	12866.6	149	0.133248	CYP3A5	7	CP35; PCN3; P450PCN3;	NM_000777.2	GeneID:1577		99115914
13835	cg13881341	0.746876	-262.18	262.18	6.05285e-27	-0.0491099	10863.7	149	0.230599	0.795986	0	1	10948.4	149	0.142575	FUT1	19	H; HH; HSC;	NM_000148.2	GeneID:2523		53951027
26508	cg26538442	0.772677	-261.868	261.868	6.50429e-27	-0.0461912	10755.1	149	0.213164	0.818868	0	1	10877.4	149	0.130039	FLJ21736	16	ES31;	NM_024922.3	GeneID:79984		65552448
23544	cg23595927	0.784817	-260.594	260.594	8.72168e-27	-0.0446557	7692	149	0.205735	0.829472	0	1	7687.33	149	0.127148	MYL5	4		NM_002477.1	GeneID:4636	4:661751-662107	661851
7122	cg07123548	0.803703	-260.426	260.426	9.06567e-27	-0.0423181	32145.8	149	0.21067	0.846021	0	1	32273.5	149	0.131499	HIPK4	19	FLJ32818;	NM_144685.3	GeneID:147746		45588003
16646	cg16581199	0.757818	-260.417	260.417	9.08385e-27	-0.0477582	8432.52	149	0.218231	0.805576	0	1	8487.29	149	0.135553	TSSK1	5	FKSG81; SPOGA4; STK22D;	NM_032028.2	GeneID:83942		112798620
1497	cg01474260	0.750082	-259.896	259.896	1.02433e-26	-0.0485622	13080.7	149	0.203967	0.798644	0	1	13095.6	149	0.129792	CESK1	22		NM_014406.4	GeneID:150160		15453884
23383	cg23413307	0.746945	-259.331	259.331	1.16643e-26	-0.048851	7950.56	149	0.21479	0.795796	0	1	8280.09	149	0.136467	LCE1F	1	LEP6;	NM_178354.1	GeneID:353137		151014096
6226	cg06255227	0.865218	-259.003	259.003	1.25803e-26	-0.033869	18368.1	149	0.157148	0.899087	0	1	18276.8	149	0.0918923	NPBWR2	20	GPR8;	NM_005286.2	GeneID:2832	20:62207758-62208595	62208569
18568	cg18557145	0.752748	-258.865	258.865	1.29855e-26	-0.0481808	16020.1	149	0.229864	0.800928	0	1	15996.7	149	0.141849	CD72	9	LYB2;	NM_001782.1	GeneID:971		35608083
8973	cg09027725	0.771549	-254.964	254.964	3.1886e-26	-0.0457555	5907.78	149	0.19782	0.817305	0	1	5912.15	149	0.120243	COX4I2	20	COX4; COX4B; COX4-2; COX4L2; COXIV-2; dJ857M17.2;	NM_032609.2	GeneID:84701		29689707
8403	cg08453096	0.828266	-254.474	254.474	3.56969e-26	-0.0387127	10775.7	149	0.173691	0.866979	0	1	11047	149	0.105198	ABCG5	2	sterolin 1;	NM_022436.2	GeneID:64240		43919397
22000	cg22035229	0.828845	-254.112	254.112	3.87972e-26	-0.0386101	10222.1	149	0.171192	0.867455	0	1	10562.9	149	0.107825	MSH4	1		NM_002440.2	GeneID:4438	1:76034981-76035517	76035236
2892	cg02899723	0.920076	-253.039	253.039	4.96661e-26	-0.0251607	18665	149	0.10134	0.945237	0	1	18767.2	149	0.0598001	DDX4	5	VASA; MGC111074;	NM_024415.1	GeneID:54514	5:55069274-55070254	55069371
13097	cg13181019	0.687632	-252.358	252.358	5.80978e-26	-0.0539394	4898.23	149	0.204076	0.741571	0	1	4876.6	149	0.139443	MPP7	10	FLJ32798; RP11-218D6.5;	NM_173496.2	GeneID:143098		28611588
16554	cg16483466	0.779364	-251.346	251.346	7.33449e-26	-0.0445564	18554.1	149	0.206888	0.82392	0	1	18386.8	149	0.131637	C20orf186	20	RY2G5; LPLUNC4; dJ726C3.5;	NM_182519.1	GeneID:149954	20:31134869-31135091	31134895
17853	cg17827767	0.737171	-251.325	251.325	7.37038e-26	-0.0491654	11751.7	149	0.231408	0.786337	0	1	11712.7	149	0.142172	LRRC21	10	PAL; DKFZP434K091;	NM_015613.1	GeneID:26103		85991134
15066	cg15062535	0.794221	-251.21	251.21	7.56903e-26	-0.0427823	8183.26	149	0.195737	0.837003	0	1	8154.44	149	0.117454	ZNF610	19	FLJ36040; MGC102679; DKFZp547A1010;	NM_173530.1	GeneID:162963		57539745
5590	cg05590982	0.749295	-251.084	251.084	7.79076e-26	-0.0478757	8274.18	149	0.202765	0.797171	0	1	8166.74	149	0.124476	P8	16	COM1;	NM_012385.1	GeneID:26471		28457672
25043	cg25061755	0.770536	-250.982	250.982	7.97719e-26	-0.0455338	21817.1	149	0.204603	0.81607	0	1	22185.7	149	0.124989	STON1	2	SBLF; STNB1; stoned-b1;	NM_006873.2	GeneID:11037		48661618
18714	cg18705776	0.722306	-250.666	250.666	8.57907e-26	-0.0505852	10769.8	149	0.224742	0.772891	0	1	10844	149	0.136182	CALML3	10	CLP;	NM_005185.2	GeneID:810		5555829
7396	cg07426848	0.741723	-250.434	250.434	9.04961e-26	-0.04861	21378.7	149	0.23583	0.790333	0	1	21773.3	149	0.145727	S100A3	1	S100E;	NM_002960.1	GeneID:6274		151788336
22048	cg22077553	0.783452	-250.096	250.096	9.78025e-26	-0.0439706	13261	149	0.208876	0.827423	0	1	13436	149	0.127644	MYOC	1	GPOA; JOAG; TIGR; GLC1A; JOAG1; myocilin;	NM_000261.1	GeneID:4653		169888355
7413	cg07441143	0.752816	-250.021	250.021	9.95085e-26	-0.0474009	19329.8	149	0.220889	0.800217	0	1	19512.3	149	0.137029	SLURP1	8	ARS; MDM; ANUP; ArsB; LY6LS;	NM_020427.2	GeneID:57152		143821003
19632	cg19642007	0.786036	-248.628	248.628	1.37151e-25	-0.0435485	11171.6	149	0.194819	0.829585	0	1	11142.4	149	0.121339	TNNT3	11	DA2B; FSSV; AMCD2B; DKFZp779M2348;	NM_006757.1	GeneID:7140		1901040
11703	cg11761535	0.759082	-248.12	248.12	1.54163e-25	-0.0465587	7071.64	149	0.210363	0.805641	0	1	7117.09	149	0.131143	TM4SF18	3	L6D;	NM_138786.1	GeneID:116441		150533721
19248	cg19250907	0.788267	-248.006	248.006	1.58256e-25	-0.0432339	5478.11	149	0.175718	0.831501	0	1	5638.48	149	0.107404	CPA6	8	CPAH;	NM_020361.2	GeneID:57094		68821882
4235	cg04201347	0.747482	-247.738	247.738	1.68333e-25	-0.0477637	17816.6	149	0.223561	0.795246	0	1	18050	149	0.134827	PRRG2	19	PRGP2;	NM_000951.1	GeneID:5639		54778661
13828	cg13877895	0.815029	-246.357	246.357	2.31382e-25	-0.0398343	7577.63	149	0.173773	0.854864	0	1	7533.88	149	0.104625	GKN1	2	FOV; CA11; AMP18; BRICD1; MGC70354; foveolin;	NM_019617.2	GeneID:56287		69054513
16798	cg16752583	0.777511	-246.236	246.236	2.37925e-25	-0.0443394	7312.32	149	0.211276	0.82185	0	1	7460.88	149	0.125645	TRPV6	7	CAT1; CATL; ZFAB; ECAC2; ABP/ZF; LP6728; HSA277909;	NM_018646.2	GeneID:55503		142293853
17298	cg17264470	0.856041	-246.176	246.176	2.41196e-25	-0.0343778	11948.5	149	0.165099	0.890419	0	1	12045.4	149	0.100949	FGF21	19		NM_019113.2	GeneID:26291		53952097
8556	cg08612871	0.755696	-246.017	246.017	2.50202e-25	-0.0467367	7669.15	149	0.227216	0.802433	0	1	7709.38	149	0.140185	GJB5	1	CX31.1;	NM_005268.2	GeneID:2709		34992921
6059	cg06094150	0.754639	-245.688	245.688	2.69886e-25	-0.0468202	16533.1	149	0.199179	0.801459	0	1	16421.9	149	0.125389	MT1B	16	MT1; MTP; MT1Q;	NM_005947.1	GeneID:4490		55243138
17715	cg17706173	0.803084	-245.595	245.595	2.75727e-25	-0.0412571	13097.1	149	0.185007	0.844341	0	1	12694	149	0.116449	C16orf30	16	CLP24; FLJ20898;	NM_024600.1	GeneID:79652		1522582
11032	cg11113534	0.857949	-244.775	244.775	3.33073e-25	-0.0340211	6725.03	149	0.142207	0.89197	0	1	6958.87	149	0.0881183	C20orf70	20	SPLUNC2; bA49G10.1;	NM_080574.2	GeneID:140683		31219685
8303	cg08351331	0.70093	-244.621	244.621	3.45025e-25	-0.0519862	18953.7	149	0.21407	0.752916	0	1	19346.5	149	0.132258	LBP	20	MGC22233;	NM_004139.2	GeneID:3929		36408497
26075	cg26099316	0.77778	-244.124	244.124	3.86937e-25	-0.0441276	16257	149	0.201058	0.821907	0	1	16232.3	149	0.126347	ITIH3	3	H3P;	NM_002217.2	GeneID:3699		52803834
11694	cg11750883	0.722261	-243.716	243.716	4.25011e-25	-0.0499214	11234.6	149	0.224563	0.772182	0	1	11227.3	149	0.139002	C1orf42	1	NICE-1;	NM_019060.1	GeneID:54544		150753574
18996	cg19000186	0.702985	-243.672	243.672	4.29388e-25	-0.0517057	10148.1	149	0.203563	0.754691	0	1	10335.9	149	0.132039	CNGA1	4	CNCG; CNG1; CNCG1; RCNC1; RCNCa; RCNCalpha;	NM_000087.2	GeneID:1259	4:47650682-47650965	47650768
13482	cg13550608	0.841665	-243.664	243.664	4.3016e-25	-0.0361689	15690.5	149	0.180407	0.877834	0	1	16130.8	149	0.109858	SEMA3B	3	SemA; SEMA5; SEMAA; semaV; LUCA-1; FLJ34863;	NT_022517.17	GeneID:7869	3:50287560-50290055	50289658
16528	cg16456919	0.809429	-243.32	243.32	4.65597e-25	-0.0402973	11560.1	149	0.181945	0.849727	0	1	11598.4	149	0.114078	LRRN5	1	GAC1; LRRN2; LRANK1;	NM_006338.2	GeneID:10446		202922001
17272	cg17240454	0.861838	-243.254	243.254	4.72672e-25	-0.0333774	17236.8	149	0.141276	0.895216	0	1	17327	149	0.0936932	SPDEF	6	PDEF; bA375E1.3; RP11-375E1__A.3;	NM_012391.1	GeneID:25803		34632256
8280	cg08332212	0.748368	-242.772	242.772	5.2819e-25	-0.0472142	5628.64	149	0.222019	0.795582	0	1	5454.65	149	0.13857	MLN	6		NM_002418.1	GeneID:4295		33878828
24795	cg24824840	0.796763	-242.099	242.099	6.16694e-25	-0.0417416	10833.6	149	0.184298	0.838504	0	1	10798.2	149	0.114266	SHANK1	19	SSTRIP; SPANK-1; synamon;	NM_016148.1	GeneID:50944	19:55911787-55912150	55911787
26204	cg26220985	0.759993	-240.776	240.776	8.36354e-25	-0.0458065	8589.8	149	0.195195	0.805799	0	1	8823.47	149	0.121229	DPT	1	TRAMP;	NM_001937.3	GeneID:1805		166964973
5943	cg05949660	0.717516	-240.654	240.654	8.60181e-25	-0.0500726	14937	149	0.215132	0.767589	0	1	14752.1	149	0.132181	MICAL1	6	MICAL; NICAL; MICAL-1; FLJ11937; FLJ21739; DKFZp434B1517;	NM_022765.2	GeneID:64780	6:109882585-109884615	109884335
1700	cg01671881	0.740508	-239.405	239.405	1.14691e-24	-0.0477148	7514.25	149	0.218225	0.788223	0	1	7507.68	149	0.133124	C20orf71	20	SPLUNC3; MGC44525;	NM_178466.2	GeneID:128861		31268562
12671	cg12728629	0.890746	-238.162	238.162	1.52686e-24	-0.0289229	18790.8	149	0.127207	0.919669	0	1	18768.9	149	0.0745135	MAGEA2	X	MAGE2; MAGEA2A;	NM_005361.2	GeneID:4101	X:151672876-151673193	151673029
2853	cg02854090	0.814523	-237.946	237.946	1.60483e-24	-0.0392578	5120.11	149	0.169689	0.853781	0	1	5075.27	149	0.108259	HIST1H2AA	6	H2AFR; bA317E16.2;	NM_170745.3	GeneID:221613	6:25834320-25834896	25834874
23637	cg23679724	0.701497	-237.934	237.934	1.60901e-24	-0.0512618	24523.5	149	0.221344	0.752758	0	1	25432.9	149	0.135275	CTSZ	20	CTSX;	NM_001336.2	GeneID:1522		57014873
13639	cg13696887	0.855877	-237.819	237.819	1.6523e-24	-0.0338544	9657.67	149	0.154313	0.889731	0	1	9760.94	149	0.0903875	KRTHB2	12	HB2; Hb-2;	NM_033033.3	GeneID:3888		51086690
15982	cg15905124	0.762677	-237.654	237.654	1.71637e-24	-0.0452396	10320.3	149	0.199433	0.807917	0	1	10410.2	149	0.124956	MGC13034	5		NM_153217.1	GeneID:134288		72500081
11429	cg11492040	0.922065	-237.588	237.588	1.74281e-24	-0.0241293	17297	149	0.0922985	0.946194	0	1	17379.9	149	0.0530366	H19	11	ASM; BWS; ASM1; MGC4485; PRO2605; D11S813E;	NT_009237.17	GeneID:283120	11:1973035-1973716	1973089
26085	cg26111757	0.736668	-237.508	237.508	1.77513e-24	-0.0479174	7961.24	149	0.230636	0.784585	0	1	8085.9	149	0.141349	C20orf185	20	RYA3; LPLUNC3; dJ726C3.4;	NM_182658.1	GeneID:359710		31105781
18005	cg17983307	0.743403	-237.185	237.185	1.91192e-24	-0.0472102	21870.8	149	0.211807	0.790613	0	1	21798.4	149	0.130984	DKFZp434B1231	1		NM_178275.3	GeneID:91156		199448025
4270	cg04245402	0.806523	-237.144	237.144	1.93028e-24	-0.0401711	10917.1	149	0.182797	0.846694	0	1	11564	149	0.118111	C19orf21	19		NM_173481.2	GeneID:126353	19:702077-702289	702241
6490	cg06501790	0.801234	-236.918	236.918	2.03329e-24	-0.0407899	7226.97	149	0.201729	0.842024	0	1	7174.87	149	0.12364	SLC34A1	5	NPT2; SLC11; NAPI-3; NPTIIa; SLC17A2;	NM_003052.2	GeneID:6569		176743863
8580	cg08634024	0.78839	-236.773	236.773	2.10237e-24	-0.0422878	6170.82	149	0.208902	0.830678	0	1	6203.74	149	0.131288	OR2F1	7	OLF3; OR2F3; OR2F4; OR2F5; OR2F3P; OR14-60; OR7-139; OR7-140;	NM_012369.1	GeneID:26211		143288110
15990	cg15913671	0.728851	-235.831	235.831	2.61186e-24	-0.048521	14642.9	149	0.231599	0.777372	0	1	14535.8	149	0.145174	TMEM105	17	FLJ38792;	NM_178520.2	GeneID:284186		76919015
17525	cg17501569	0.823395	-235.218	235.218	3.00746e-24	-0.0379365	14257	149	0.169708	0.861331	0	1	14254.8	149	0.10619	MSLN	16	MPF; SMR; CAK1;	NM_005823.4	GeneID:10232	16:750966-751193	751065
19979	cg19998328	0.813941	-234.898	234.898	3.23735e-24	-0.0390894	17667.5	149	0.186505	0.853031	0	1	17919	149	0.11881	LOC90580	19		NM_138358.2	GeneID:90580		10899320
25828	cg25852472	0.745057	-233.911	233.911	4.0635e-24	-0.0467371	19878.2	149	0.176857	0.791794	0	1	19971	149	0.112481	H19	11	ASM; BWS; ASM1; MGC4485; PRO2605; D11S813E;	NT_009237.17	GeneID:283120	11:1973888-1974871	1974240
21870	cg21902327	0.760988	-233.243	233.243	4.73947e-24	-0.0450235	18612.7	149	0.20501	0.806012	0	1	18717.9	149	0.128818	FGF6	12	HST2; HBGF-6;	NM_020996.1	GeneID:2251	12:4425015-4425387	4425047
10904	cg10994126	0.717368	-233.178	233.178	4.81094e-24	-0.0493465	10153.6	149	0.193426	0.766714	0	1	10433.8	149	0.120766	PAPPA2	1	PAPPE; PLAC3; PAPP-A2;	NM_020318.1	GeneID:60676		174699121
2599	cg02601403	0.836309	-233.14	233.14	4.85266e-24	-0.0361338	22430.3	149	0.169223	0.872443	0	1	22020.1	149	0.105998	TBC1D3C	17	MGC44903;	NM_001001418.2	GeneID:414060		31616166
24338	cg24389347	0.787686	-232.984	232.984	5.03025e-24	-0.0420526	11474.4	149	0.17946	0.829738	0	1	11546	149	0.106366	C3orf22	3	MGC34728;	NM_152533.1	GeneID:152065		127760383
8192	cg08244028	0.73082	-232.853	232.853	5.18478e-24	-0.0480412	5404.68	149	0.202571	0.778861	0	1	5338.17	149	0.12647	MSH3	5		NM_002439.2	GeneID:4437		79985095
20862	cg20904010	0.761584	-232.762	232.762	5.29407e-24	-0.044912	6010.9	149	0.206939	0.806496	0	1	6102.39	149	0.129217	SYN3	22		NM_003490.2	GeneID:8224		31732393
24914	cg24939733	0.746175	-232.728	232.728	5.33581e-24	-0.0465074	4804	149	0.21014	0.792683	0	1	4808.91	149	0.136247	FLJ38159	11		NM_152723.1	GeneID:220388		85075332
23941	cg23984130	0.747694	-232.414	232.414	5.73562e-24	-0.0463234	5918.59	149	0.212209	0.794018	0	1	6283.74	149	0.133705		2			GeneID:28905		88996300
22539	cg22575540	0.820574	-231.892	231.892	6.46919e-24	-0.0380351	11724.5	149	0.172838	0.858609	0	1	11774	149	0.106129	TRIM54	2	MURF; RNF30; MURF-3;	NM_032546.2	GeneID:57159		27359129
22166	cg22190114	0.838236	-231.305	231.305	7.40423e-24	-0.03575	6907.16	149	0.153852	0.873986	0	1	7029.77	149	0.0988823	NALP8	19	NOD16;	NM_176811.2	GeneID:126205		61151046
1791	cg01772980	0.752146	-231.097	231.097	7.76694e-24	-0.0457453	8493.9	149	0.186854	0.797891	0	1	8614.94	149	0.114124	SCGB1D1	11	LIPA; LPHA; MGC71958;	NM_006552.1	GeneID:10648		61714271
9619	cg09674867	0.788506	-230.976	230.976	7.98785e-24	-0.0417858	17176.6	149	0.182643	0.830292	0	1	17277	149	0.115039	C11orf16	11		NM_020643.1	GeneID:56673		8910782
47	cg00042156	0.750748	-230.856	230.856	8.21051e-24	-0.0458647	14231.8	149	0.211951	0.796612	0	1	14365.5	149	0.131125	MGC16291	10		NM_032770.3	GeneID:84856		42290848
16437	cg16358738	0.816746	-230.488	230.488	8.93738e-24	-0.0383986	22701	149	0.180403	0.855145	0	1	22617.4	149	0.114736	AGXT	2	AGT; SPT; AGT1; SPAT; TLH6; AGXT1;	NM_000030.1	GeneID:189		241457268
5217	cg05190718	0.74429	-230.406	230.406	9.10647e-24	-0.0464757	8357.57	149	0.233617	0.790766	0	1	8509.49	149	0.144164	CASQ2	1	PDIB2;	NM_001232.1	GeneID:845		116112235
26334	cg26354398	0.800224	-229.929	229.929	1.01641e-23	-0.0403392	11104.9	149	0.181045	0.840563	0	1	11108.4	149	0.109191	RGS3	9	C2PA; RGP3; FLJ20370; FLJ31516; FLJ90496; PDZ-RGS3;	NM_134427.1	GeneID:5998		115263857
25636	cg25651984	0.904002	-229.124	229.124	1.2236e-23	-0.0264604	29339.2	149	0.114603	0.930463	0	1	29499.2	149	0.0677288	MAGEC1	X	CT7; MAGE-C1;	NM_005462.3	GeneID:9947	X:140819187-140819447	140819258
4866	cg04806409	0.87363	-229.052	229.052	1.24403e-23	-0.030833	13722.1	149	0.131892	0.904463	0	1	13695.4	149	0.0844415	TFF3	21	ITF; TFI; HITF; hP1.B;	NM_003226.2	GeneID:7033		42608574
9311	cg09390792	0.797604	-229.038	229.038	1.24784e-23	-0.0405719	5730.71	149	0.176345	0.838176	0	1	5690.94	149	0.11071	TSPAN18	11	TSPAN;	NM_130783.2	GeneID:90139		44838020
13597	cg13656062	0.861441	-228.83	228.83	1.30909e-23	-0.0324965	12120.3	149	0.149046	0.893937	0	1	12295.6	149	0.0885392	CYP4F2	19	CPF2;	NM_001082.3	GeneID:8529		15869723
15	cg00013618	0.748534	-228.706	228.706	1.34722e-23	-0.0458853	10083.6	149	0.206386	0.79442	0	1	9936.11	149	0.128449		22			GeneID:3535		20710839
2176	cg02157083	0.76031	-228.673	228.673	1.35753e-23	-0.0446674	11735.3	149	0.179971	0.804978	0	1	11886.3	149	0.112542	APOA5	11	RAP3; APOAV; APOA-V; MGC126836; MGC126838;	NM_052968.3	GeneID:116519		116168010
11409	cg11474811	0.739523	-228.583	228.583	1.38589e-23	-0.0467709	13029.3	149	0.22019	0.786293	0	1	13088	149	0.133991	TRPM5	11	MTR1; LTRPC5;	NM_014555.2	GeneID:29850		2400445
16188	cg16112945	0.685529	-227.101	227.101	1.94926e-23	-0.0514654	9212.73	149	0.219327	0.736995	0	1	9223.23	149	0.137798	ADAMTS13	9	TTP; VWFCP; C9orf8; vWF-CP; MGC118899; MGC118900; DKFZp434C2322;	NM_139025.2	GeneID:11093		135275627
17809	cg17788013	0.715359	-227.075	227.075	1.96133e-23	-0.0489052	4524.65	149	0.211568	0.764265	0	1	4685.24	149	0.137637	SPINK5	5	LEKTI; LETKI; VAKTI;	NM_006846.2	GeneID:11005		147423445
8482	cg08539991	0.675045	-226.596	226.596	2.18973e-23	-0.05224	20815.4	149	0.218047	0.727285	0	1	21371.1	149	0.142594	ZBTB32	19	Rog; FAXF; FAZF; TZFP; ZNF538;	NM_014383.1	GeneID:27033		40895672
9445	cg09509673	0.757406	-226.225	226.225	2.38501e-23	-0.044746	9859.14	149	0.186758	0.802152	0	1	9989.66	149	0.113159	CCR10	17	GPR2;	NM_016602.1	GeneID:2826		38087223
8799	cg08834018	0.722273	-225.939	225.939	2.54742e-23	-0.0481585	5033.94	149	0.203217	0.770432	0	1	4803.3	149	0.12878	PRODH	22	PIG6; SCZD4; HSPOX2; PRODH1; PRODH2; TP53I6;	NM_016335.2	GeneID:5625	22:17304641-17304900	17304883
3204	cg03167883	0.747803	-225.291	225.291	2.95754e-23	-0.0456368	6188.36	149	0.207386	0.793439	0	1	6267.56	149	0.129219	FLJ46365	8		NM_207504.1	GeneID:401459		49665520
5763	cg05766474	0.888036	-225.288	225.288	2.95937e-23	-0.0285696	15877	149	0.125815	0.916605	0	1	16011.3	149	0.0782141	CCL16	17	LEC; LMC; NCC4; CKb12; HCC-4; LCC-1; Mtn-1; NCC-4; SCYL4; ILINCK; SCYA16; MGC117051;	NM_004590.2	GeneID:6360		31332781
21693	cg21686987	0.77921	-225.288	225.288	2.95937e-23	-0.0423335	19607.1	149	0.220949	0.821543	0	1	19731.1	149	0.136864	CTRB1	16	CTRB; FLJ42412; MGC88037;	NM_001906.3	GeneID:1504		73810474
13228	cg13300756	0.77659	-225.156	225.156	3.05056e-23	-0.0426074	21522.3	149	0.161215	0.819198	0	1	21924.8	149	0.107848	HAS1	19	HAS;	NM_001523.1	GeneID:3036	19:56919725-56919930	56919850
3851	cg03819692	0.791231	-224.942	224.942	3.20465e-23	-0.0409582	12410.6	149	0.184198	0.832189	0	1	12350.1	149	0.116442	FLJ36701	16		NM_173617.1	GeneID:283860	16:87752957-87753393	87753140
6413	cg06437862	0.754289	-223.834	223.834	4.13638e-23	-0.044842	5166.49	149	0.182048	0.799131	0	1	5023.96	149	0.117318	TUBA2	13	bA408E5.3;	NM_079836.1	GeneID:7278	13:18653806-18654153	18654096
17691	cg17687282	0.77183	-223.746	223.746	4.22046e-23	-0.0429977	6335.45	149	0.202335	0.814827	0	1	6568.44	149	0.125965	A4GNT	3	alpha4GnT;	NM_016161.1	GeneID:51146		139333801
3898	cg03860768	0.678366	-222.19	222.19	6.03921e-23	-0.0515015	7159.07	149	0.211856	0.729867	0	1	7211.25	149	0.132374	BLK	8	MGC10442;	NM_001715.2	GeneID:640		11388980
13081	cg13164309	0.670701	-222.148	222.148	6.0986e-23	-0.052082	5858.22	149	0.209782	0.722783	0	1	5897.49	149	0.127732	CDA	1	CDD; hscd;	NM_001785.1	GeneID:978		20770604
15465	cg15464148	0.714333	-221.978	221.978	6.34162e-23	-0.0484766	14746.8	149	0.216481	0.76281	0	1	15162.3	149	0.136711	GPR92	12	GPR93; KPG_010;	NM_020400.4	GeneID:57121		6615318
8357	cg08411049	0.82036	-221.604	221.604	6.91242e-23	-0.0372636	15852.1	149	0.182909	0.857624	0	1	15870.3	149	0.113687	SERPINB5	18	PI5; maspin;	NM_002639.2	GeneID:5268	18:59294878-59295284	59295230
19789	cg19812619	0.714199	-221.436	221.436	7.18489e-23	-0.0484319	13545.1	149	0.19811	0.762631	0	1	13830.9	149	0.128171	ITGB7	12		NM_000889.1	GeneID:3695		51886921
8314	cg08365982	0.855335	-221.264	221.264	7.47481e-23	-0.0328049	13502.6	149	0.15871	0.88814	0	1	13532.1	149	0.10185	CAV3	3	VIP21; LGMD1C; VIP-21; MGC126100; MGC126101; MGC126129;	NM_001234.3	GeneID:859	3:8750552-8750774	8750601
13703	cg13758677	0.835609	-220.761	220.761	8.39305e-23	-0.0353119	14086	149	0.162673	0.870921	0	1	14157.4	149	0.100681	GAGE4	X	GAGE5;	NM_001474.1	GeneID:2576	X:49101965-49102205	49102197
19508	cg19516009	0.775674	-220.706	220.706	8.49904e-23	-0.0423114	4677.85	149	0.167932	0.817985	0	1	4670.53	149	0.0998502	SFTPC	8	SP-C; PSP-C; SFTP2;	NM_003018.2	GeneID:6440		22074025
13111	cg13201322	0.741713	-220.432	220.432	9.05378e-23	-0.0457677	3757.59	149	0.189504	0.787481	0	1	3756.37	149	0.121918	MAGEB1	X	DAM10; MAGEL1; MAGE-Xp; MGC9322;	NM_002363.3	GeneID:4112		30171146
16360	cg16280667	0.725156	-220.42	220.42	9.07883e-23	-0.0473334	15342.6	149	0.205001	0.77249	0	1	15874.4	149	0.126957	BLR1	11	CD185; CXCR5; MDR15; MGC117347;	NM_001716.2	GeneID:643	11:118259679-118259945	118259803
9961	cg10046892	0.813818	-220.174	220.174	9.60661e-23	-0.0379348	18454.8	149	0.167706	0.851753	0	1	18961.6	149	0.105688	PAQR6	1	FLJ22672;	NM_024897.2	GeneID:79957		154484566
4977	cg04929865	0.757754	-220.159	220.159	9.64118e-23	-0.0441393	13049.6	149	0.201595	0.801893	0	1	13464.1	149	0.124542	BGN	X	PGI; DSPG1; PG-S1; SLRR1A;	NM_001711.3	GeneID:633		152413272
845	cg00823148	0.691152	-220.132	220.132	9.70063e-23	-0.0502511	7609.68	149	0.212865	0.741404	0	1	7499.99	149	0.131658	CRYGB	2	CRYG2;	NM_005210.2	GeneID:1419		208720540
15297	cg15303841	0.813544	-219.801	219.801	1.04698e-22	-0.0379356	9352.4	149	0.164807	0.851479	0	1	9218.08	149	0.102667	RFPL1	22	RNF78;	NM_021026.1	GeneID:5988		28163804
9964	cg10051054	0.792594	-219.757	219.757	1.05765e-22	-0.0403582	7440.31	149	0.191544	0.832952	0	1	7491.71	149	0.131233	CCDC27	1	FLJ32825; MGC138313; MGC138317; RP1-286D6.1;	NM_152492.1	GeneID:148870		3659032
12818	cg12869058	0.735722	-219.264	219.264	1.18476e-22	-0.0462246	8066.91	149	0.230124	0.781947	0	1	7956.26	149	0.138651	ABCA4	1	FFM; RMP; ABCR; RP19; STGD; ABC10; CORD3; STGD1; DKFZp781N1972;	NM_000350.1	GeneID:24		94360460
20441	cg20485165	0.727673	-219.117	219.117	1.22558e-22	-0.046965	16505.2	149	0.220091	0.774638	0	1	16811.6	149	0.135655	WFDC12	20	WAP2; SWAM2; C20orf122; dJ211D12.4;	NM_080869.1	GeneID:128488		43186463
8845	cg08887581	0.801727	-218.932	218.932	1.27885e-22	-0.0392468	15716	149	0.173911	0.840974	0	1	16079.7	149	0.107314	C1orf64	1	MGC24047; RP11-5P18.4;	NM_178840.2	GeneID:149563		16203303
18525	cg18508525	0.784477	-218.606	218.606	1.37848e-22	-0.0411609	6017.55	149	0.201169	0.825637	0	1	6063.12	149	0.129444	CD36	7	FAT; GP4; GP3B; GPIV; PASIV; SCARB3;	NM_001001547.1	GeneID:948		80067998
24709	cg24743310	0.874856	-218.418	218.418	1.43953e-22	-0.0299888	12150.6	149	0.129999	0.904845	0	1	12026.9	149	0.0842575	FLJ31196	17	MATE2;	NM_152908.2	GeneID:146802		19560497
8273	cg08321330	0.775106	-218.351	218.351	1.46174e-22	-0.0421534	16369.8	149	0.192675	0.817259	0	1	16791.6	149	0.11876	TPSB2	16	TPS2; TPSB1; tryptaseC;	NM_024164.5	GeneID:64499		1220835
13324	cg13396068	0.746102	-217.95	217.95	1.60328e-22	-0.0450902	6143.09	149	0.201807	0.791192	0	1	6155.11	149	0.124042	DCD	12	PIF; AIDD; DSEP; MGC71930;	NM_053283.1	GeneID:117159		53327646
21569	cg21578906	0.840578	-217.181	217.181	1.91399e-22	-0.0344152	13714.3	149	0.157794	0.874993	0	1	13507.8	149	0.0899588	SLC5A4	22	SAAT1; SGLT3; DJ90G24.4;	NM_014227.1	GeneID:6527		30981345
21294	cg21307628	0.77908	-216.921	216.921	2.03175e-22	-0.0415987	7307.61	149	0.199939	0.820678	0	1	7413.68	149	0.125807	URB	3	DRO1; SSG1;	NM_199511.1	GeneID:151887		113843642
21116	cg21148892	0.804265	-216.519	216.519	2.22915e-22	-0.0387524	19574.9	149	0.177755	0.843017	0	1	19386.2	149	0.110578	CLEC4F	2	KCLR; CLECSF13; FLJ39110;	NM_173535.2	GeneID:165530		70901157
13168	cg13255629	0.793775	-216.242	216.242	2.37591e-22	-0.0399221	9371.37	149	0.197006	0.833697	0	1	9298.38	149	0.121906	MEPE	4	OF45;	NM_020203.1	GeneID:56955		88971684
23656	cg23696712	0.829611	-215.22	215.22	3.00615e-22	-0.035634	24931.5	149	0.158956	0.865245	0	1	25052.5	149	0.0984889	KRT6L	12		NM_175834.2	GeneID:338785		51514408
13675	cg13733733	0.734084	-215.158	215.158	3.04937e-22	-0.045969	8181.55	149	0.179911	0.780053	0	1	8510.91	149	0.117023	LILRA3	19	e3; HM31; HM43; ILT6; LIR4; CD85E; LIR-4;	NM_006865.2	GeneID:11026		59495352
14514	cg14519000	0.868796	-214.76	214.76	3.34234e-22	-0.0305738	24690.5	149	0.120357	0.89937	0	1	24649.2	149	0.0729216	GATA5	20	bB379O24.1;	NT_011362.9	GeneID:140628	20:60474622-60475245	60475160
19084	cg19099213	0.736902	-214.752	214.752	3.34834e-22	-0.0456619	3756.82	149	0.204805	0.782564	0	1	3754.21	149	0.129549	SPP2	2	SPP24;	NM_006944.2	GeneID:6694		234623454
27346	cg27412093	0.797233	-214.345	214.345	3.67688e-22	-0.0393708	9228.87	149	0.196527	0.836604	0	1	9178.87	149	0.121561	CAPN9	1	GC36; nCL-4;	NM_006615.2	GeneID:10753		228949010
6636	cg06639544	0.726835	-214.31	214.31	3.70647e-22	-0.046552	7541.51	149	0.21356	0.773387	0	1	7644.09	149	0.132838	OR7A5	19	HTPCR2;	NM_017506.1	GeneID:26659		14801319
13522	cg13587552	0.834613	-214.266	214.266	3.74473e-22	-0.0349423	24483.5	149	0.164314	0.869555	0	1	24235.3	149	0.104938	SCNN1D	1	ENaCd; SCNED; dNaCh; ENaCdelta;	NM_002978.2	GeneID:6339		1206304
10749	cg10857345	0.773154	-213.886	213.886	4.08705e-22	-0.0419536	9311.65	149	0.185438	0.815108	0	1	9407.35	149	0.115472	TEX13B	X	TGC3B; TSGA5;	NM_031273.1	GeneID:56156		107112286
1876	cg01853981	0.875038	-213.782	213.782	4.18553e-22	-0.0296671	22896.6	149	0.126287	0.904705	0	1	22816.3	149	0.0719959	KRT6IRS	12	K6IRS1; KRT6IRS1; MGC119390; MGC119391;	NM_033448.1	GeneID:112802		51232749
27279	cg27342801	0.769165	-213.769	213.769	4.19875e-22	-0.0423588	8635.25	149	0.213651	0.811524	0	1	8737.86	149	0.131242	REG3A	2	HIP; PAP; PAP1; REG3; INGAP; PAP-H; PBCGF; REG-III;	NM_138937.1	GeneID:5068		79240781
20943	cg20985014	0.775069	-213.371	213.371	4.60108e-22	-0.0417026	11887.1	149	0.187484	0.816772	0	1	11769.4	149	0.115993	WISP3	6	PPD; CCN6; LIBC; PPAC; MGC125987; MGC125989;	NM_003880.2	GeneID:8838		112480844
8151	cg08191915	0.753163	-213.262	213.262	4.71867e-22	-0.0439344	11101.6	149	0.208549	0.797097	0	1	11160.8	149	0.122962	PANX3	11		NM_052959.2	GeneID:116337		123986824
8882	cg08929103	0.690036	-213.262	213.262	4.71867e-22	-0.0495845	11570.4	149	0.212862	0.73962	0	1	11723.1	149	0.130384	CRHR1	17	CRF1; CRHR; CRF-R; CRFR1; CRHR1f;	NM_004382.2	GeneID:1394		41216118
13851	cg13897627	0.73755	-213.262	213.262	4.71867e-22	-0.0454454	12269.1	149	0.199338	0.782995	0	1	12319	149	0.123758	FLJ44674	16		NM_207449.1	GeneID:400535		47935998
23784	cg23834593	0.733115	-213.002	213.002	5.0098e-22	-0.0458341	12804.4	149	0.1918	0.778949	0	1	12933	149	0.120292	HNF4A	20	TCF; HNF4; MODY; MODY1; NR2A1; TCF14; HNF4a7; HNF4a8; HNF4a9; NR2A21; FLJ39654;	NM_000457.3	GeneID:3172		42417334
27425	cg27495908	0.720004	-212.913	212.913	5.11293e-22	-0.0470166	5689.01	149	0.20458	0.767021	0	1	5691.73	149	0.12683	C9orf79	9	FLJ35866;	NM_178828.3	GeneID:286234		89688043
1380	cg01369413	0.721834	-212.735	212.735	5.32697e-22	-0.0468343	7199.94	149	0.205561	0.768668	0	1	7140.58	149	0.124493	UBQLN3	11	TUP-1;	NM_017481.2	GeneID:50613		5487120
8351	cg08402568	0.929021	-212.543	212.543	5.5675e-22	-0.0218724	21617.9	149	0.0926145	0.950893	0	1	21729.2	149	0.055531	MGC34647	16		NM_152456.1	GeneID:146433		69238318
26442	cg26473272	0.880532	-212.489	212.489	5.63703e-22	-0.0288332	21738.4	149	0.13169	0.909365	0	1	21787	149	0.0765631	SYT8	11	DKFZp434K0322;	NM_138567.2	GeneID:90019		1812844
26793	cg26822175	0.792066	-212.453	212.453	5.68486e-22	-0.0397747	9261.08	149	0.134804	0.831841	0	1	9192.74	149	0.0901952	CRYBA4	22		NM_001886.1	GeneID:1413		25348010
2192	cg02168291	0.704018	-212.377	212.377	5.78549e-22	-0.0483369	8950.37	149	0.211494	0.752355	0	1	8991.25	149	0.132717	CDH13	16	CDHH;	NT_010498.15	GeneID:1012	16:81228442-81229032	81229021
25545	cg25545210	0.773488	-211.726	211.726	6.72125e-22	-0.0417118	8258.09	149	0.201765	0.8152	0	1	8010.24	149	0.124853	KRTHA4	17	HA4; Ha-4; hHa4;	NM_021013.3	GeneID:3885		36791943
16223	cg16155702	0.798357	-211.59	211.59	6.93474e-22	-0.0389981	30744.7	149	0.178475	0.837355	0	1	30967.2	149	0.115537	FGF21	19		NM_019113.2	GeneID:26291		53952022
25975	cg25995460	0.810595	-211.09	211.09	7.77983e-22	-0.0375606	7528.98	149	0.148651	0.848155	0	1	7722.94	149	0.0900854	C1QA	1		NM_015991.1	GeneID:712		22836743
9291	cg09354331	0.813783	-210.897	210.897	8.13392e-22	-0.0371727	11767.5	149	0.189529	0.850956	0	1	11455.7	149	0.120372	RAI17	10	Zimp10; FLJ13541; KIAA1224;	NM_020338.2	GeneID:57178		80631388
14765	cg14761227	0.727848	-210.897	210.897	8.13392e-22	-0.0460981	13703.9	149	0.215094	0.773946	0	1	13611.4	149	0.134095	CPA1	7	CPA;	NM_001868.1	GeneID:1357		129808324
10490	cg10569414	0.826539	-210.825	210.825	8.26913e-22	-0.035654	17553.6	149	0.176412	0.862193	0	1	17417.8	149	0.110906	C21orf121	21	PRED87;	NM_198078.1	GeneID:150142		42315323
3765	cg03742272	0.812119	-210.525	210.525	8.86217e-22	-0.037335	15312.1	149	0.174916	0.849454	0	1	15116.8	149	0.109575	ALOX12B	17	12R-LOX;	NM_001139.1	GeneID:242		7931430
12264	cg12343082	0.862977	-210.147	210.147	9.66629e-22	-0.0310255	20090.1	149	0.144332	0.894003	0	1	19962.8	149	0.0871325	CA5A	16	CA5; CAV; CAVA;	NM_001739.1	GeneID:763		86527646
21900	cg21930712	0.716266	-210.029	210.029	9.93368e-22	-0.047037	6915.09	149	0.217116	0.763303	0	1	6950.24	149	0.133607	FLJ40235	19		NM_173635.1	GeneID:284369		56452928
8078	cg08109646	0.719772	-209.433	209.433	1.13938e-21	-0.0466678	7774.8	149	0.222618	0.76644	0	1	7693.27	149	0.137344	ZNF683	1	MGC33414; RP11-569G9.6;	NM_173574.1	GeneID:257101		26571221
9863	cg09936762	0.742602	-209.281	209.281	1.17997e-21	-0.0445605	5405.74	149	0.218183	0.787162	0	1	5413.62	149	0.136616	RAI17	10	Zimp10; FLJ13541; KIAA1224;	NM_020338.2	GeneID:57178		80629694
14535	cg14533138	0.771783	-209.281	209.281	1.17997e-21	-0.0416594	8388.32	149	0.20006	0.813443	0	1	8142.88	149	0.125982	KRTHA3B	17	HA3II; Ha-3II; KRTHA3A; hHa3-II;	NM_002279.3	GeneID:3884	17:36779251-36779455	36779447
24656	cg24691461	0.676121	-208.637	208.637	1.36871e-21	-0.0501294	15390.6	149	0.217012	0.72625	0	1	15682.8	149	0.136877	C20orf160	20	dJ310O13.5;	NM_080625.2	GeneID:140706		30062162
10244	cg10318258	0.762844	-208.583	208.583	1.38589e-21	-0.0425086	6547.63	149	0.219248	0.805353	0	1	6527.55	149	0.136139	RIPK3	14	RIP3; RIP3 beta; RIP3 gamma;	NM_006871.2	GeneID:11035		23879599
25217	cg25221254	0.805524	-208.54	208.54	1.39965e-21	-0.0379245	13560.7	149	0.153722	0.843448	0	1	13441.1	149	0.0910552	ASAH3	19	ACER1;	NM_133492.1	GeneID:125981	19:6284351-6284668	6284547
574	cg00554173	0.77332	-208.517	208.517	1.40695e-21	-0.0414268	12790.2	149	0.194067	0.814747	0	1	12836.8	149	0.123319	ProSAPiP1	20	KIAA0552;	NM_014731.2	GeneID:9762		3097777
14188	cg14209518	0.759211	-208.204	208.204	1.51227e-21	-0.042835	8186.62	149	0.208052	0.802045	0	1	8294.01	149	0.128604	NNMT	11		NM_006169.2	GeneID:4837		113671846
13624	cg13681935	0.825236	-207.895	207.895	1.62383e-21	-0.0355756	10758.9	149	0.178497	0.860812	0	1	10647	149	0.105947	ASIP	20	ASP; AGSW; AGTI; AGTIL; MGC126092; MGC126093;	NM_001672.2	GeneID:434		32312113
4178	cg04126866	0.756609	-207.657	207.657	1.71506e-21	-0.04304	22808.3	149	0.176158	0.799649	0	1	22863.9	149	0.106315	C10orf99	10	UNQ1833; FLJ21763;	NM_207373.1	GeneID:387695		85922743
21376	cg21400896	0.671568	-207.371	207.371	1.83193e-21	-0.050316	13210.5	149	0.211687	0.721884	0	1	13595.1	149	0.134717	ABI3	17	NESH; SSH3BP3;	NM_016428.2	GeneID:51225		44643568
6607	cg06617418	0.700511	-206.988	206.988	2.00083e-21	-0.0480357	4757.3	149	0.184194	0.748547	0	1	4728.2	149	0.111339	RGAG1	X	KIAA1318;	NM_020769.1	GeneID:57529		109548769
19935	cg19949550	0.768197	-206.988	206.988	2.00083e-21	-0.0418103	8953.28	149	0.212269	0.810007	0	1	8954.5	149	0.129924	ASB2	14	ASB-2; MGC40044;	NM_016150.3	GeneID:51676		93493457
11840	cg11884243	0.838027	-206.62	206.62	2.17766e-21	-0.0339289	16863.2	149	0.145749	0.871955	0	1	16960.2	149	0.0926262	FCN2	9	P35; FCNL; EBP-37; ficolin-2;	NM_004108.2	GeneID:2220	9:136912687-136912888	136912707
24093	cg24134767	0.717963	-206.551	206.551	2.21243e-21	-0.0465159	11090.2	149	0.224507	0.764479	0	1	11222.9	149	0.137976	HTR3A	11	HTR3; 5HT3R; 5-HT-3; 5-HT3A; 5-HT3R;	NM_000869.2	GeneID:3359		113350848
16030	cg15954792	0.688417	-206.538	206.538	2.21917e-21	-0.0489485	8983.4	149	0.213653	0.737366	0	1	8864.61	149	0.131934	CNGA3	2	CNG3; ACHM2; CCNC1; CCNCa; CNCG3; CCNCalpha;	NM_001298.1	GeneID:1261		98353403
22385	cg22415472	0.737699	-205.906	205.906	2.56679e-21	-0.0446755	9333.11	149	0.200074	0.782374	0	1	9336.3	149	0.123046	SLC5A7	2	CHT; CHT1; hCHT;	NM_021815.2	GeneID:60482		107968793
10481	cg10560038	0.914444	-205.332	205.332	2.92968e-21	-0.0236536	13478.2	149	0.101581	0.938098	0	1	14198.2	149	0.0647103	CMTM5	14	CKLFSF5; FLJ37521;	NM_138460.2	GeneID:116173	14:22914711-22914916	22914716
3347	cg03330516	0.725168	-205.265	205.265	2.97523e-21	-0.0457469	18809.6	149	0.185506	0.770915	0	1	18882.5	149	0.117963	SRMS	20	SRM; C20orf148; dJ697K14.1;	NM_080823.2	GeneID:6725	20:61648644-61649388	61649188
18446	cg18434152	0.836756	-205.124	205.124	3.07362e-21	-0.0339678	6051.06	149	0.142617	0.870723	0	1	5996.81	149	0.087157	PROK1	1	PK1; PRK1; EGVEGF;	NM_032414.2	GeneID:84432		110795047
19995	cg20016416	0.707543	-205.124	205.124	3.07362e-21	-0.047249	5766.89	149	0.207671	0.754792	0	1	5784.16	149	0.130278	SPTBN2	11	SCA5;	NM_006946.1	GeneID:6712		66246097
19671	cg19692710	0.699821	-204.842	204.842	3.27967e-21	-0.0478525	4587.16	149	0.207279	0.747674	0	1	4551.45	149	0.126514	DNAJB13	11	TSARG5; TSARG6; FLJ46748;	NM_153614.2	GeneID:374407		73339568
501	cg00488300	0.833514	-204.81	204.81	3.30392e-21	-0.0343359	16223.2	149	0.160275	0.86785	0	1	16358.9	149	0.100745	TPSG1	16	TMT; trpA; PRSS31;	NM_012467.2	GeneID:25823		1216491
27379	cg27446185	0.718013	-204.59	204.59	3.4756e-21	-0.0462996	8412.71	149	0.219211	0.764312	0	1	8527.74	149	0.135635	VTCN1	1	B7X; B7H4; B7S1; B7-H4; B7h.5; PRO1291; FLJ22418; RP11-229A19.4;	NM_024626.1	GeneID:79679		117555488
505	cg00491404	0.72973	-204.211	204.211	3.79201e-21	-0.0452259	16121.6	149	0.171386	0.774956	0	1	16410.9	149	0.106621	EPS8L3	1	EPS8R3; FLJ21522; MGC16817;	NM_024526.2	GeneID:79574		110108114
2819	cg02813121	0.818919	-204.187	204.187	3.81329e-21	-0.0360153	12075.2	149	0.158299	0.854935	0	1	12005.3	149	0.0990321	S100A12	1	p6; CGRP; MRP6; CAAF1; ENRAGE;	NM_005621.1	GeneID:6283		151615535
12385	cg12456510	0.832579	-204.024	204.024	3.95931e-21	-0.0343859	12764.1	149	0.156125	0.866965	0	1	13022	149	0.0932415	TFF2	21	SP; SML1;	NM_005423.3	GeneID:7032		42644424
19114	cg19125606	0.788947	-204.001	204.001	3.9797e-21	-0.0393533	10190.4	149	0.166513	0.828301	0	1	10388.4	149	0.104416	AGT	1	ANHU; SERPINA8;	NM_000029.2	GeneID:183		228916922
22954	cg22988566	0.802395	-203.738	203.738	4.22873e-21	-0.0378578	16615.4	149	0.174781	0.840253	0	1	16993.9	149	0.104868	WFDC10B	20	WAP12;	NM_172006.2	GeneID:280664		43768283
17483	cg17463527	0.754189	-203.722	203.722	4.24385e-21	-0.0428838	10365.8	149	0.194543	0.797073	0	1	10425.4	149	0.12076	SGK2	20	H-SGK2; dJ138B7.2;	NM_016276.3	GeneID:10110		41621251
20645	cg20691580	0.785186	-203.397	203.397	4.57436e-21	-0.0396996	20906	149	0.181632	0.824885	0	1	20982.2	149	0.111106	APOC3	11	APOCIII;	NM_000040.1	GeneID:345		116206254
13469	cg13531460	0.722344	-203.186	203.186	4.80187e-21	-0.0457695	20543.4	149	0.229795	0.768114	0	1	21341	149	0.145311	GPR55	2		NM_005683.2	GeneID:9290		231499057
6461	cg06489008	0.749166	-203.14	203.14	4.853e-21	-0.0433087	4418.56	149	0.171176	0.792475	0	1	4382.38	149	0.107054	CST11	20	SC13; CST8L; dJ322G13.6;	NM_080830.2	GeneID:140880		23381349
14229	cg14256699	0.913863	-203.012	203.012	4.99862e-21	-0.0236087	14261.6	149	0.100605	0.937472	0	1	14316.6	149	0.0643091	SOST	17	VBCH;	NM_025237.2	GeneID:50964	17:39191384-39191613	39191552
5912	cg05921699	0.726137	-202.947	202.947	5.07388e-21	-0.0454078	6366.37	149	0.211078	0.771545	0	1	6377.93	149	0.129972	CD79A	19	IGA; MB-1;	NM_001783.2	GeneID:973		47072565
25817	cg25839227	0.687282	-202.832	202.832	5.20967e-21	-0.0486086	14411.7	149	0.218804	0.73589	0	1	14697.4	149	0.13886	ABI3	17	NESH; SSH3BP3;	NM_016428.2	GeneID:51225		44643501
23456	cg23499956	0.775224	-202.667	202.667	5.4119e-21	-0.0406716	32382.2	149	0.210782	0.815896	0	1	32762.3	149	0.135167	S100A16	1	S100F; DT1P1A7; MGC17528;	NM_080388.1	GeneID:140576		151851544
11621	cg11688469	0.722455	-202.563	202.563	5.54294e-21	-0.0456893	12499.3	149	0.207982	0.768145	0	1	12329.8	149	0.127972	TNNI1	1	TNN1; DKFZp451O223;	NM_003281.3	GeneID:7135		199657684
24898	cg24926042	0.702693	-202.529	202.529	5.58612e-21	-0.047353	28715.7	149	0.217426	0.750046	0	1	29257.6	149	0.139449	KRTHB2	12	HB2; Hb-2;	NM_033033.3	GeneID:3888		51086266
11938	cg11983245	0.710319	-202.228	202.228	5.98618e-21	-0.0466906	19447.6	149	0.213096	0.757009	0	1	19896.8	149	0.129701	KRT15	17	K15; CK15; K1CO;	NM_002275.2	GeneID:3866		36928680
19861	cg19868730	0.798363	-201.799	201.799	6.60891e-21	-0.038129	8235.19	149	0.195955	0.836492	0	1	8255.54	149	0.120905	POPDC2	3	POP2;	NM_022135.2	GeneID:64091		120862702
8628	cg08684473	0.846569	-201.723	201.723	6.72465e-21	-0.0324982	25696.9	149	0.161336	0.879067	0	1	26088	149	0.104519	LILRB5	19	LIR8; CD85C; LIR-8;	NM_006840.2	GeneID:10990		59452902
11740	cg11801374	0.793664	-201.708	201.708	6.74761e-21	-0.0386317	9911.98	149	0.165321	0.832296	0	1	9711.36	149	0.10349	C20orf160	20	dJ310O13.5;	NM_080625.2	GeneID:140706		30061355
25527	cg25527547	0.811881	-201.706	201.706	6.75118e-21	-0.0366095	8781.41	149	0.174811	0.848491	0	1	8842.23	149	0.11085	PLOD3	7	LH3;	NM_001084.4	GeneID:8985		100649020
2772	cg02765820	0.731829	-201.703	201.703	6.75585e-21	-0.0447629	6493.74	149	0.220115	0.776592	0	1	6504.52	149	0.134632	C3orf22	3	MGC34728;	NM_152533.1	GeneID:152065		127760710
3281	cg03264414	0.795374	-201.171	201.171	7.6359e-21	-0.0383971	14418.2	149	0.177337	0.833771	0	1	14720.1	149	0.11138	PAEP	9	GD; GdA; GdF; GdS; PEP; PAEG; PP14;	NM_001018049.1	GeneID:5047		137593518
15466	cg15465321	0.774196	-201.123	201.123	7.72129e-21	-0.0406272	9324.86	149	0.174421	0.814823	0	1	9330.33	149	0.112461	PEPP-2	X	PEPP2;	NM_032498.1	GeneID:84528		119176625
21618	cg21624282	0.859051	-200.842	200.842	8.23835e-21	-0.0308682	10821	149	0.131149	0.88992	0	1	11209.4	149	0.0769493	LOC122258	13	FLJ27356;	NM_145248.2	GeneID:122258		112078784
16258	cg16192029	0.907399	-200.698	200.698	8.5153e-21	-0.0243945	11845.6	149	0.110844	0.931794	0	1	11917.7	149	0.075591	ANKRD7	7	TSA806;	NM_019644.1	GeneID:56311	7:117651804-117652144	117651910
5862	cg05873268	0.769387	-200.369	200.369	9.1865e-21	-0.0410437	16182.9	149	0.187397	0.810431	0	1	16357.5	149	0.118943	TPSAB1	16	TPS1; TPS2; TPSB1; alpha II;	NM_003294.3	GeneID:7177		1230059
14673	cg14672680	0.863051	-200.359	200.359	9.20556e-21	-0.0303237	19170.9	149	0.119733	0.893375	0	1	19006.4	149	0.0740212	TNNI2	11	DA2B; FSSV; AMCD2B;	NM_003282.2	GeneID:7136	11:1816405-1816646	1816414
5256	cg05241571	0.868651	-200.156	200.156	9.64695e-21	-0.0295892	18989.8	149	0.134536	0.89824	0	1	18894.9	149	0.0837235	UNQ467	19		NM_207392.1	GeneID:388533		40673064
16349	cg16270990	0.68945	-199.343	199.343	1.16322e-20	-0.0480389	18194.9	149	0.210963	0.737489	0	1	18597.7	149	0.127726	C11orf44	11	FLJ39058;	NM_173580.1	GeneID:283171		130048107
12148	cg12213910	0.730469	-199.154	199.154	1.21509e-20	-0.0446163	7334.98	149	0.201493	0.775086	0	1	7388.6	149	0.125127	RAET1E	6	LETAL; ULBP4; MGC125309; bA350J20.7;	NM_139165.1	GeneID:135250		150252904
5039	cg04995095	0.676927	-199.129	199.129	1.22214e-20	-0.04895	6600.47	149	0.199735	0.725877	0	1	6585.22	149	0.127476	CD300E	17	CLM2; IREM2; CD300LE;	NM_181449.1	GeneID:342510		70131151
3532	cg03520136	0.739243	-198.98	198.98	1.26482e-20	-0.0438043	4779.46	149	0.218821	0.783047	0	1	4738.61	149	0.138948	UPP2	2	UP2; UPASE2; UDRPASE2;	NM_173355.2	GeneID:151531		158559546
9205	cg09261262	0.781292	-198.571	198.571	1.38957e-20	-0.039654	11796.8	149	0.201552	0.820946	0	1	12097.2	149	0.126026	OPN4	10	MOP;	NM_033282.2	GeneID:94233		88404534
11231	cg11297236	0.677268	-198.531	198.531	1.40259e-20	-0.0488543	5291.81	149	0.204681	0.726122	0	1	5309.91	149	0.128925	PDILT	16		NM_174924.1	GeneID:204474		20323976
6728	cg06736444	0.710753	-198.396	198.396	1.44677e-20	-0.046228	18320.5	149	0.223669	0.756981	0	1	18486.5	149	0.140465	SRRM2	16	300-KD; SRL300; SRm300; KIAA0324; MGC40295;	NM_016333.2	GeneID:23524	16:2741471-2743551	2741794
27277	cg27341860	0.888455	-198.384	198.384	1.45088e-20	-0.0268593	27357.3	149	0.119363	0.915314	0	1	27387.5	149	0.0785469	OR2L13	1	OR2L14; MGC40047;	NM_175911.2	GeneID:284521	1:246166364-246166628	246166503
16603	cg16529592	0.649517	-198.357	198.357	1.45979e-20	-0.0507362	11825	149	0.202053	0.700253	0	1	11841.4	149	0.124993	RUNX3	1	AML2; CBFA3; PEBP2aC;	NM_004350.1	GeneID:864		25164802
17099	cg17067005	0.739293	-198.341	198.341	1.46518e-20	-0.0437297	4483.79	149	0.200462	0.783023	0	1	4382.63	149	0.124627	IL10	1	CSIF; TGIF; IL-10; IL10A; MGC126450; MGC126451;	NM_000572.2	GeneID:3586		205011969
26910	cg26946769	0.720033	-198.21	198.21	1.50998e-20	-0.0454215	4521.04	149	0.201836	0.765455	0	1	4604.62	149	0.12537	MAPK4	18	ERK3; Erk4; PRKM4; p63MAPK;	NM_002747.2	GeneID:5596		46443536
5561	cg05556202	0.781307	-197.347	197.347	1.84204e-20	-0.0395354	9029.11	149	0.197202	0.820843	0	1	9004.17	149	0.121924	TM4SF19	3	OCTM4;	NM_138461.1	GeneID:116211		197549503
23178	cg23207527	0.76169	-197.298	197.298	1.86303e-20	-0.0415049	4503.69	149	0.181352	0.803195	0	1	4432.23	149	0.115801	RBM24	6	RNPC6; FLJ30829; FLJ37697; dJ259A10.1;	NM_153020.1	GeneID:221662		17391092
2882	cg02882813	0.781156	-197.172	197.172	1.9177e-20	-0.0395334	9837.97	149	0.163089	0.820689	0	1	9846.95	149	0.100556	CST5	20	MGC71922;	NM_001900.4	GeneID:1473		23808078
19466	cg19465374	0.849846	-196.938	196.938	2.02381e-20	-0.0317299	13882.7	149	0.148428	0.881576	0	1	14241.7	149	0.0944766	AZGP1	7	ZAG; ZA2G;	NM_001185.2	GeneID:563		99411214
21170	cg21207436	0.707857	-196.844	196.844	2.06833e-20	-0.0462911	19201.8	149	0.213582	0.754148	0	1	19107.1	149	0.131248	C14orf115	14	FLJ10811;	NM_018228.1	GeneID:55237		73885069
24668	cg24697329	0.809733	-196.556	196.556	2.20984e-20	-0.036405	11653	149	0.161193	0.846138	0	1	11608.2	149	0.0994575	ARHGEF4	2	ASEF; GEF4; STM6;	NM_015320.2	GeneID:50649		131390846
20477	cg20530056	0.719171	-196.077	196.077	2.46803e-20	-0.0452639	11843.5	149	0.183665	0.764435	0	1	11931.5	149	0.112474	IKBKE	1	IKKE; IKKI; IKK-i; KIAA0151; MGC125294; MGC125295; MGC125297;	NM_014002.2	GeneID:9641		204710000
18230	cg18223379	0.797512	-195.907	195.907	2.56637e-20	-0.0376886	10305.4	149	0.17167	0.8352	0	1	10326	149	0.108427	BPIL3	20	LPLUNC6;	NM_174897.1	GeneID:128859		31083308
12255	cg12334759	0.749081	-195.791	195.791	2.63603e-20	-0.0425596	10926.5	149	0.201595	0.79164	0	1	10864	149	0.122216	C19orf19	19	FLJ40059; MGC129962; MGC129963;	NM_182577.1	GeneID:284451		426154
19849	cg19857541	0.900613	-195.786	195.786	2.63888e-20	-0.0250494	13854.4	149	0.1086	0.925662	0	1	14092.7	149	0.0668581	MORC1	3	MORC; ZCW6;	NM_014429.2	GeneID:27136	3:110319373-110319935	110319490
15204	cg15210427	0.695651	-195.774	195.774	2.64624e-20	-0.0471428	22998.4	149	0.22261	0.742794	0	1	23805.6	149	0.13845	CST9L	20	bA218C14.1;	NM_080610.1	GeneID:128821		23496991
754	cg00725777	0.756131	-195.648	195.648	2.72377e-20	-0.0418748	4293.69	149	0.185894	0.798006	0	1	4428.95	149	0.121179	NGFRAP1	X	Bex; BEX3; NADE; HGR74; DXS6984E;	NM_206915.1	GeneID:27018	X:102516452-102517083	102517067
16512	cg16431978	0.722525	-195.466	195.466	2.8404e-20	-0.0449074	15322.1	149	0.215073	0.767432	0	1	15714.9	149	0.132261	KRTAP13-3	21	KAP13.3; MGC119828;	NM_181622.1	GeneID:337960		30719803
15889	cg15820955	0.762478	-194.996	194.996	3.16534e-20	-0.0411966	14556.2	149	0.1702	0.803675	0	1	14505.7	149	0.103578	HDAC7A	12	HDAC7; DKFZP586J0917;	NM_015401.1	GeneID:51564		46479206
20800	cg20851097	0.648667	-194.959	194.959	3.19242e-20	-0.0503685	8238.91	149	0.186861	0.699036	0	1	7957.82	149	0.115832	SPTB	14	HSpTB1;	NM_000347.4	GeneID:6710		64359588
19554	cg19560971	0.729203	-194.384	194.384	3.6441e-20	-0.0442124	15156.2	149	0.195592	0.773416	0	1	15221.4	149	0.123546	MFRP	11	NNO2; FLJ30570;	NM_031433.1	GeneID:83552		118723448
18506	cg18493182	0.810153	-193.97	193.97	4.00876e-20	-0.0361326	25996.9	149	0.180361	0.846285	0	1	26085.6	149	0.11766	LYPD2	8	LYPDC2; UNQ430;	NM_205545.1	GeneID:137797		143830964
12175	cg12242338	0.728088	-193.888	193.888	4.08517e-20	-0.0442563	7989.4	149	0.174202	0.772344	0	1	7990.54	149	0.10614	TRIM42	3	FLJ40097;	NM_152616.3	GeneID:287015		141879779
21133	cg21168884	0.780561	-193.84	193.84	4.13028e-20	-0.0392765	7030.41	149	0.16844	0.819837	0	1	7010.01	149	0.106152	C6orf122	6	FLJ31451; dJ266L20.5;	NM_207502.1	GeneID:401288		169940896
24259	cg24323726	0.706512	-193.748	193.748	4.21891e-20	-0.0460503	16469.5	149	0.204998	0.752562	0	1	16677.9	149	0.128772	ZBED2	3	MGC10796;	NM_024508.3	GeneID:79413		112796876
14041	cg14076161	0.689003	-193.72	193.72	4.2462e-20	-0.0474137	12977.6	149	0.223271	0.736417	0	1	13021.3	149	0.14175	PRB4	12	Po;	NM_002723.3	GeneID:5545		11354646
24455	cg24490338	0.822272	-193.696	193.696	4.26953e-20	-0.0347413	7960.12	149	0.167095	0.857013	0	1	7996.19	149	0.10374	TPM3	1	TRK; NEM1; MGC72094;	NM_152263.1	GeneID:7170		152430678
27175	cg27235662	0.695994	-193.444	193.444	4.52533e-20	-0.0468459	9452.76	149	0.216489	0.74284	0	1	9658.92	149	0.132818	CLDN16	3	PCLN1;	NM_006580.2	GeneID:10686		191588680
17032	cg17001430	0.76075	-193.34	193.34	4.6349e-20	-0.0411958	9829.9	149	0.174903	0.801945	0	1	10064.2	149	0.107347	KIF25	6	KNSL3;	NM_030615.1	GeneID:3834		168161125
7029	cg07039113	0.822744	-193.075	193.075	4.9264e-20	-0.0346349	13748.6	149	0.171567	0.857379	0	1	13438	149	0.110771	S100A9	1	MIF; NIF; P14; CAGB; CFAG; CGLB; L1AG; LIAG; MRP14; 60B8AG; MAC387;	NM_002965.2	GeneID:6280		151595637
11204	cg11267879	0.719679	-192.816	192.816	5.22841e-20	-0.044857	4142.37	149	0.205432	0.764536	0	1	4173.66	149	0.126927	CYP2F1	19	C2F1; CYP2F; MGC126121;	NM_000774.3	GeneID:1572		46311792
12802	cg12855851	0.823817	-192.731	192.731	5.33237e-20	-0.0344829	16746.6	149	0.152383	0.8583	0	1	16690.4	149	0.0916626	PGC	6		NM_002630.1	GeneID:5225		41823163
4100	cg04048249	0.696087	-192.692	192.692	5.3796e-20	-0.0467503	8385.37	149	0.195273	0.742838	0	1	8291.47	149	0.122003	APOC3	11	APOCIII;	NM_000040.1	GeneID:345		116205766
24313	cg24357161	0.670682	-192.136	192.136	6.11463e-20	-0.0485543	25343.6	149	0.180158	0.719236	0	1	26080.9	149	0.118284	RCV1	17		NM_002903.2	GeneID:5957	17:9750704-9750982	9750839
4336	cg04311964	0.818375	-191.984	191.984	6.33286e-20	-0.0350381	25053.2	149	0.17659	0.853413	0	1	24852	149	0.108769	LYPD2	8	LYPDC2; UNQ430;	NM_205545.1	GeneID:137797		143830944
17405	cg17386181	0.763309	-191.84	191.84	6.54636e-20	-0.040797	8164.29	149	0.178647	0.804106	0	1	8113.51	149	0.104022	MT1B	16	MT1; MTP; MT1Q;	NM_005947.1	GeneID:4490		55243403
10496	cg10575735	0.7655	-191.46	191.46	7.14463e-20	-0.0405467	5742.63	149	0.184397	0.806046	0	1	5725.18	149	0.114199	SSX4	X	MGC12411;	NM_005636.3	GeneID:6759		48156567
25911	cg25936385	0.842107	-191.415	191.415	7.21872e-20	-0.0322385	6828.41	149	0.138832	0.874346	0	1	6874.18	149	0.0812955	FAIM2	12	LFG; NGP35; NMP35; TMBIM2; KIAA0950;	NM_012306.2	GeneID:23017		48584998
21649	cg21652012	0.844671	-191.194	191.194	7.59696e-20	-0.0319146	13141.9	149	0.148878	0.876585	0	1	13300.7	149	0.0942592	GABRP	5		NM_014211.1	GeneID:2568		170143587
4191	cg04138756	0.73989	-191.11	191.11	7.74533e-20	-0.0429087	17096.8	149	0.182603	0.782798	0	1	17242	149	0.1142	SPRR3	1		NM_005416.1	GeneID:6707		151240473
17307	cg17272094	0.745407	-191.075	191.075	7.80675e-20	-0.0424036	5623.23	149	0.207469	0.787811	0	1	5519.56	149	0.128651	C3orf45	3	FLJ38608;	NM_153215.1	GeneID:132228		50292227
1105	cg01091565	0.765401	-190.623	190.623	8.66403e-20	-0.0404707	12674.2	149	0.2003	0.805872	0	1	12542.1	149	0.124638	MESP1	15	MGC10676; IR1899308;	NM_018670.1	GeneID:55897		88095766
27426	cg27496506	0.739854	-190.623	190.623	8.66403e-20	-0.0428593	9099.17	149	0.176949	0.782713	0	1	9036.41	149	0.1102	TGM5	15	TGX; TGM6; TGMX;	NM_201631.1	GeneID:9333		41346462
13636	cg13694749	0.843981	-190.333	190.333	9.26105e-20	-0.031929	17940.7	149	0.149816	0.87591	0	1	17487.7	149	0.0929606	SCN4A	17	HYPP; HYKPP; NAC1A; Nav1.4; hNa(V)1.4;	NM_000334.3	GeneID:6329	17:59403667-59403892	59403770
10743	cg10848367	0.675744	-190.142	190.142	9.67832e-20	-0.0479557	8613.08	149	0.200099	0.7237	0	1	8729.54	149	0.125111	SCGB1D2	11	LIPB; LPHB;	NM_006551.3	GeneID:10647		61765641
621	cg00601486	0.854711	-189.85	189.85	1.03505e-19	-0.0305952	8474	149	0.131655	0.885306	0	1	8341.75	149	0.0846497	H1T2	12		NM_181788.1	GeneID:341567	12:47009414-47010208	47009415
1491	cg01469547	0.804481	-189.536	189.536	1.11286e-19	-0.0363556	4583.12	149	0.156342	0.840837	0	1	4658.17	149	0.102045	OR5P3	11	JCG1;	NM_153445.1	GeneID:120066		7803731
20241	cg20281815	0.901913	-189.128	189.128	1.22233e-19	-0.0244725	14676.3	149	0.114921	0.926385	0	1	14849.6	149	0.0673521	PSCA	8	PRO232;	NM_005672.2	GeneID:8000		143758510
6926	cg06940107	0.769914	-189.121	189.121	1.22425e-19	-0.0398802	6736.72	149	0.199338	0.809795	0	1	6942.4	149	0.126089	C21orf100	21	MGC125397; MGC125398; MGC125399; MGC125400;	NM_145033.1	GeneID:118421		28833654
1121	cg01109219	0.734136	-189.105	189.105	1.22885e-19	-0.0432037	4543.18	149	0.198523	0.77734	0	1	4572.91	149	0.126095	RASGRP3	2	GRP3; KIAA0846;	NM_170672.1	GeneID:25780	2:33514078-33514283	33514258
952	cg00918005	0.802131	-188.968	188.968	1.26826e-19	-0.0365561	11205.2	149	0.168585	0.838687	0	1	11297.1	149	0.104742	REG3G	2	PAP1B; PAPIB; UNQ429; REG-III; MGC118999; MGC119001;	NM_001008387.1	GeneID:130120		79106718
2350	cg02311163	0.768709	-188.768	188.768	1.32791e-19	-0.0399619	5484.46	149	0.186198	0.808671	0	1	5482.18	149	0.11719	SEMG2	20	SGII;	NM_003008.2	GeneID:6407		43283925
18533	cg18515587	0.718738	-188.673	188.673	1.35747e-19	-0.0444714	4363.36	149	0.18041	0.763209	0	1	4303.09	149	0.111477	SELENBP1	1	LPSB; SP56; hSBP; hSP56; FLJ13813;	NM_003944.2	GeneID:8991		149611430
26848	cg26870566	0.730221	-188.495	188.495	1.41416e-19	-0.0434774	7305.74	149	0.196798	0.773698	0	1	7277.38	149	0.124757	KIRREL	1	NEPH1; FLJ10845;	NM_018240.3	GeneID:55243		156229099
14900	cg14894216	0.680663	-188.01	188.01	1.58114e-19	-0.0473477	5781.04	149	0.2067	0.728011	0	1	5836.44	149	0.130819	CATSPER1	11	CATSPER; MGC33335; MGC33368;	NM_053054.2	GeneID:117144		65550928
9135	cg09196942	0.695393	-187.704	187.704	1.69672e-19	-0.0462216	8395.6	149	0.148188	0.741615	0	1	8536.16	149	0.101147	PRAMEF1	1	dJ1198H6.1; RP5-845O24.1;	NM_023013.1	GeneID:65121		12774206
16838	cg16791508	0.714345	-187.522	187.522	1.76913e-19	-0.0447051	5176.72	149	0.204525	0.75905	0	1	5106.66	149	0.130436	KRTHB3	12	HB3; Hb-3;	NM_002282.2	GeneID:3889		51001958
8858	cg08901867	0.731986	-187.479	187.479	1.78702e-19	-0.0432138	4129.02	149	0.192141	0.7752	0	1	4264.05	149	0.122424	TTLL6	17	FLJ35808;	NM_173623.1	GeneID:284076	17:44225747-44226049	44226041
1088	cg01074640	0.851204	-187.337	187.337	1.84629e-19	-0.0308287	15343.7	149	0.137667	0.882032	0	1	15322.8	149	0.086432	IFNA17	9	IFNA;	NM_021268.1	GeneID:3451		21218142
24416	cg24457403	0.692893	-186.967	186.967	2.01057e-19	-0.0463235	21326.7	149	0.225983	0.739216	0	1	21593.2	149	0.143847	KRT16	17	K16; CK16; K1CP; NEPPK; KRT16A;	NM_005557.2	GeneID:3868		37023863
16162	cg16084788	0.860672	-186.894	186.894	2.04461e-19	-0.0296423	11393.1	149	0.130789	0.890315	0	1	11429.8	149	0.0801396	SLC2A7	1	GLUT7;	NM_207420.1	GeneID:155184		9008733
19413	cg19420968	0.889562	-186.682	186.682	2.14679e-19	-0.0259605	14511.9	149	0.109304	0.915523	0	1	14452.5	149	0.0721052	HCRTR1	1	OX1R;	NM_001525.1	GeneID:3061		31857551
11624	cg11692021	0.743483	-186.38	186.38	2.30149e-19	-0.0420797	11340.3	149	0.172172	0.785563	0	1	11542.3	149	0.106778	GNB3	12		NM_002075.2	GeneID:2784		6819733
6299	cg06325687	0.890251	-186.182	186.182	2.40885e-19	-0.0258383	10721.3	149	0.0969333	0.916089	0	1	10828	149	0.0577866	OPN1MW	X	CBD; DCB; GCP; CBBM;	NM_000513.1	GeneID:2652		153102151
3149	cg03128832	0.672842	-186.102	186.102	2.4533e-19	-0.0476661	3142.68	149	0.190172	0.720508	0	1	3172.62	149	0.130546	APOL5	22	APOL-V;	NM_030642.1	GeneID:80831		34442848
14818	cg14818279	0.820924	-186.102	186.102	2.4533e-19	-0.034243	7190.31	149	0.161117	0.855167	0	1	7285.62	149	0.100109	SH3TC2	5	CMT4C; CMTND; FLJ13605; KIAA1985;	NM_024577.2	GeneID:79628		148422747
15785	cg15750705	0.880695	-186.066	186.066	2.47389e-19	-0.0270672	12354.9	149	0.121557	0.907762	0	1	12187.5	149	0.0756759	GJB4	1	CX30.3; MGC21116;	NM_153212.1	GeneID:127534		34999294
4770	cg04721098	0.706747	-186.009	186.009	2.50674e-19	-0.0451389	7725.12	149	0.199741	0.751886	0	1	7910.15	149	0.124363	CACNG3	16	Cacng2;	NM_006539.2	GeneID:10368		24173204
19240	cg19240938	0.843711	-185.829	185.829	2.61246e-19	-0.0316021	8806.89	149	0.142181	0.875314	0	1	8674.75	149	0.0866757	SLC22A18	11	HET; ITM; BWR1A; IMPT1; TSSC5; ORCTL2; BWSCR1A; SLC22A1L; p45-BWR1A; DKFZp667A184;	NT_009237.17	GeneID:5002	11:2898556-2899108	2898612
19098	cg19109431	0.751074	-185.815	185.815	2.6209e-19	-0.0413264	3981.74	149	0.186593	0.7924	0	1	3959.04	149	0.11872	NFKBIE	6	IKBE;	NM_004556.2	GeneID:4794		44342489
16224	cg16158220	0.777297	-185.811	185.811	2.62343e-19	-0.0388179	6987.68	149	0.193694	0.816115	0	1	7121.71	149	0.124477	REGL	2		XR_000606.1	GeneID:5969		79237399
17323	cg17291001	0.776187	-185.81	185.81	2.62446e-19	-0.0389271	12630.8	149	0.188431	0.815114	0	1	12587.5	149	0.11605	SERPINA13	14	UNQ6121;	NM_207378.1	GeneID:388007		94177379
6825	cg06825166	0.813476	-185.205	185.205	3.01648e-19	-0.0349858	21826.7	149	0.156905	0.848462	0	1	21872.9	149	0.100008	TMEM10	10	TMP10; HTMP10;	NM_033207.2	GeneID:93377		98109069
21436	cg21457804	0.807816	-185.105	185.105	3.08688e-19	-0.0355909	4757.55	149	0.160061	0.843407	0	1	4833.85	149	0.104216	CT45-2	X		NM_152582.3	GeneID:158852	X:134763422-134763814	134763689
14030	cg14062083	0.741893	-184.568	184.568	3.49325e-19	-0.0420241	4783.46	149	0.194329	0.783917	0	1	4851.55	149	0.124068	KRTAP13-4	21	KAP13.4;	NM_181600.1	GeneID:284827		30724700
4241	cg04211807	0.844545	-183.98	183.98	3.99982e-19	-0.0313577	10612.4	149	0.139033	0.875903	0	1	10643.7	149	0.0907068	ZCCHC13	X	Cnbp2; ZNF9L;	NM_203303.1	GeneID:389874	X:73440299-73441439	73440678
21077	cg21109025	0.753102	-183.882	183.882	4.09053e-19	-0.0409382	4388.62	149	0.173212	0.79404	0	1	4438.19	149	0.10554	CCL2	17	HC11; MCAF; MCP1; MCP-1; SCYA2; GDCF-2; SMC-CF; HSMCR30; MGC9434; GDCF-2 HC11;	NM_002982.3	GeneID:6347		29604982
21005	cg21044104	0.753466	-183.858	183.858	4.1132e-19	-0.0409014	8602.26	149	0.201792	0.794367	0	1	8428.59	149	0.127913	LYZL4	3	LYC4; MGC26768; 1810009N24Rik;	NM_144634.2	GeneID:131375		42426880
2258	cg02229946	0.71966	-183.808	183.808	4.16121e-19	-0.043843	4768.07	149	0.218584	0.763503	0	1	4762.6	149	0.136055	IL1F7	2	FIL1; FIL1Z; IL1H4; IL-1F7; IL-1H4; IL1RP1; IL-1RP1; FIL1(ZETA);	NM_014439.3	GeneID:27178		113386383
22006	cg22038738	0.839126	-183.808	183.808	4.16121e-19	-0.0319752	25561.2	149	0.183375	0.871102	0	1	25979.7	149	0.119717	PLAT	8	TPA; T-PA; DKFZp686I03148;	NM_000930.2	GeneID:5327		42183830
1730	cg01708964	0.869683	-183.26	183.26	4.72041e-19	-0.0282611	12506.9	149	0.118709	0.897945	0	1	12423	149	0.0690564	MYL7	7	MYL2A; MYLC2A;	NM_021223.2	GeneID:58498		44148316
4496	cg04459030	0.710251	-182.825	182.825	5.21831e-19	-0.0444939	10817.8	149	0.197896	0.754744	0	1	10856.9	149	0.12035	GHRH	20	GRF; GHRF; MGC119781;	NM_021081.3	GeneID:2691		35318563
9864	cg09936839	0.704094	-182.768	182.768	5.28676e-19	-0.04497	8880.89	149	0.184473	0.749064	0	1	9041.11	149	0.111932	SIRT6	19	SIR2L6;	NM_016539.1	GeneID:51548	19:4132627-4132893	4132854
26539	cg26574610	0.689408	-182.676	182.676	5.40033e-19	-0.0460671	6647.37	149	0.214039	0.735475	0	1	6526.65	149	0.131754	VPREB3	22	8HS20; N27C7-2;	NM_013378.1	GeneID:29802		22425989
2075	cg02046017	0.723556	-182.404	182.404	5.74857e-19	-0.0433633	5357.41	149	0.201528	0.766919	0	1	5340.35	149	0.122224	LOC220070	11		NM_145308.2	GeneID:220070		70385054
21954	cg21979032	0.839938	-182.191	182.191	6.03782e-19	-0.0317501	13157.7	149	0.145162	0.871688	0	1	13387.8	149	0.0880436	CYP8B1	3	CP8B; CYP12;	NM_004391.1	GeneID:1582		42892521
3265	cg03245641	0.676118	-182.015	182.015	6.28767e-19	-0.0469347	21044.4	149	0.183451	0.723053	0	1	21289.1	149	0.113622	GPHA2	11	GPA2; ZSIG51;	NM_130769.2	GeneID:170589		64459991
10335	cg10414946	0.743476	-181.673	181.673	6.80252e-19	-0.0415711	5814.55	149	0.19742	0.785048	0	1	5899.98	149	0.120749	MS4A2	11	APY; IGEL; IGER; ATOPY; FCERI; IGHER; MS4A1; FCER1B;	NM_000139.2	GeneID:2206		59612934
4047	cg03998348	0.736646	-181.657	181.657	6.82763e-19	-0.0421677	4373.66	149	0.195377	0.778813	0	1	4489.25	149	0.1258	TMCO5	15	FLJ35807; MGC35118;	NM_152453.2	GeneID:145942		36014577
17679	cg17676574	0.742416	-181.642	181.642	6.85252e-19	-0.04166	21808.3	149	0.195117	0.784076	0	1	21659	149	0.11955	UROC1	3	FLJ31300; HMFN0320;	NM_144639.1	GeneID:131669		127720063
17427	cg17399166	0.717982	-181.54	181.54	7.01471e-19	-0.0437219	17374.6	149	0.21068	0.761703	0	1	17654.5	149	0.135411	CD1D	1		NM_001766.2	GeneID:912		156416419
14723	cg14719352	0.739528	-181.359	181.359	7.31223e-19	-0.0418826	18068.8	149	0.19926	0.781411	0	1	18158.7	149	0.126392	FUT1	19	H; HH; HSC;	NM_000148.2	GeneID:2523		53949943
2308	cg02274362	0.910402	-181.125	181.125	7.7172e-19	-0.022849	20072.3	149	0.0927683	0.933251	0	1	19928.3	149	0.0573668	PNMA6A	X	MGC15827;	NM_032882.2	GeneID:84968	X:151990675-151993000	151992153
6854	cg06852744	0.868565	-181.125	181.125	7.7172e-19	-0.0282435	13650	149	0.132856	0.896809	0	1	13752.5	149	0.0843305	AEBP1	7	ACLP;	NM_001129.3	GeneID:165		44109498
1695	cg01668126	0.776143	-181.051	181.051	7.85127e-19	-0.0384575	6872.12	149	0.201124	0.814601	0	1	7037.52	149	0.12967	MSR1	8	SR-A; CD204; phSR1; phSR2; SCARA1;	NM_002445.2	GeneID:4481		16095111
7420	cg07446846	0.790222	-180.689	180.689	8.53375e-19	-0.0370192	16299.8	149	0.153205	0.827241	0	1	17236.2	149	0.0951615	SLC6A8	X	CT1; CRTR; MGC87396;	NM_005629.1	GeneID:6535		152605556
16818	cg16773028	0.732026	-180.546	180.546	8.81922e-19	-0.0424393	7188.84	149	0.177365	0.774465	0	1	7182.86	149	0.111654	KCNA2	1	HK4; MK2; HBK5; NGK1; RBK2; HUKIV; KV1.2; MGC50217;	NM_004974.2	GeneID:3737		110949862
10915	cg11003133	0.674717	-180.36	180.36	9.20428e-19	-0.0468239	5712.9	149	0.212987	0.721541	0	1	5863.46	149	0.137694	AIM2	1	PYHIN4;	NM_004833.1	GeneID:9447		157313015
25102	cg25112191	0.663425	-180.331	180.331	9.26702e-19	-0.0475751	23447.7	149	0.206216	0.711	0	1	23819.8	149	0.13546	RORC	1	TOR; RORG; RZRG; NR1F3; MGC129539;	NM_005060.3	GeneID:6097		150070884
25213	cg25218351	0.758269	-180.307	180.307	9.31794e-19	-0.0400806	21329	149	0.197823	0.798349	0	1	21112.2	149	0.120642	TRIM54	2	MURF; RNF30; MURF-3;	NM_032546.2	GeneID:57159		27358950
14354	cg14366490	0.697522	-180.156	180.156	9.64806e-19	-0.0451581	14061.2	149	0.215147	0.74268	0	1	14192.6	149	0.133373	TXNL6	19	RDCVF;	NM_138454.1	GeneID:115861		17432825
8843	cg08886154	0.686176	-180.146	180.146	9.66963e-19	-0.04599	8746.07	149	0.194354	0.732166	0	1	8698.08	149	0.117944	PAX4	7		NM_006193.1	GeneID:5078		127043912
16810	cg16762386	0.800371	-179.964	179.964	1.00837e-18	-0.0359034	13644.8	149	0.16235	0.836275	0	1	13548.1	149	0.100696	NR0B2	1	SHP; SHP1;	NM_021969.1	GeneID:8431		27113101
5731	cg05730092	0.795999	-179.824	179.824	1.04129e-18	-0.0363427	7457.99	149	0.175619	0.832342	0	1	7442.89	149	0.111272	KIAA1446	14	BEGAIN;	NM_020836.2	GeneID:57596		100106223
17257	cg17229197	0.770872	-179.786	179.786	1.05049e-18	-0.0388371	6238.79	149	0.173262	0.809709	0	1	6206.86	149	0.100572	KCNQ1	11	LQT; RWS; WRS; LQT1; ATFB1; KCNA8; KCNA9; Kv1.9; Kv7.1; KVLQT1;	NT_009237.17	GeneID:3784	11:2498865-2499473	2499264
13363	cg13434852	0.805884	-179.781	179.781	1.0517e-18	-0.0353063	11777.1	149	0.156558	0.841191	0	1	11781	149	0.0998418	DOCK1	10	DOCK180;	NM_001380.2	GeneID:1793		128658171
13977	cg14014225	0.831964	-179.647	179.647	1.08478e-18	-0.0324448	20381.7	149	0.131047	0.864409	0	1	20801.4	149	0.0832819	SLC16A8	22	MCT3;	NM_013356.1	GeneID:23539	22:36809096-36809364	36809182
26388	cg26408003	0.878454	-179.47	179.47	1.12974e-18	-0.0268925	9632.99	149	0.109517	0.905347	0	1	9552.08	149	0.0655257	C14orf94	14	FLJ20424;	NM_017815.1	GeneID:54930	14:22495702-22497852	22496926
17984	cg17964955	0.712064	-179.413	179.413	1.14459e-18	-0.0439446	7606.69	149	0.213041	0.756008	0	1	7366.56	149	0.132506	RBP3	10	IRBP; RBPI; D10S64; D10S65; D10S66;	NM_002900.2	GeneID:5949		48010942
1028	cg00995152	0.719586	-179.183	179.183	1.2069e-18	-0.0433147	6851.42	149	0.182916	0.762901	0	1	6894.8	149	0.115195	DAB2IP	9	AIP1; AF9Q34; DIP1/2; KIAA1743;	NT_008470.18	GeneID:153090	9:123536075-123536593	123536136
4544	cg04505023	0.720743	-178.929	178.929	1.27953e-18	-0.0431917	15876.8	149	0.20889	0.763935	0	1	15974.2	149	0.132117	SPRR1A	1	SPRK;	NM_005987.2	GeneID:6698		151222810
6939	cg06948937	0.747001	-178.863	178.863	1.2993e-18	-0.040945	7835.38	149	0.188399	0.787946	0	1	7602.28	149	0.121564	PCTK3	1	PCTAIRE; PCTAIRE3;	NM_002596.2	GeneID:5129		203740027
3669	cg03649060	0.69268	-178.701	178.701	1.34862e-18	-0.0453386	9961.72	149	0.214024	0.738018	0	1	9777.69	149	0.131396	ELOF1	19	MGC4549;	NM_032377.2	GeneID:84337		11526451
24322	cg24365867	0.862591	-178.552	178.552	1.39585e-18	-0.028778	11366.7	149	0.124801	0.891369	0	1	11321.6	149	0.0865661	MRVI1	11	IRAG; JAW1L;	NM_130385.1	GeneID:10335		10672171
1787	cg01767116	0.715156	-178.38	178.38	1.45211e-18	-0.0435778	10980.9	149	0.199383	0.758734	0	1	10706.3	149	0.12442	FBXL22	15	Fbl22; FLJ39626; MGC75496;	NM_203373.1	GeneID:283807		61676146
616	cg00596686	0.701316	-178.363	178.363	1.45791e-18	-0.0446521	4044.53	149	0.194724	0.745968	0	1	4017.99	149	0.12203	STS	X	ES; ASC; ARSC; SSDD; ARSC1;	NM_000351.3	GeneID:412		7147332
3710	cg03699566	0.746524	-178.267	178.267	1.49049e-18	-0.0409209	7764.58	149	0.181588	0.787445	0	1	7606.45	149	0.117397	FOLR1	11	FBP; FOLR; MOv18; FR-alpha;	NM_000802.2	GeneID:2348		71578300
20990	cg21033494	0.825475	-178.153	178.153	1.52996e-18	-0.0330392	7701.15	149	0.144127	0.858514	0	1	7657.06	149	0.0939849	MSMB	10	MSP; PSP; IGBF; MSPB; PN44; PRPS; PSP57; PSP94; PSP-94;	NM_002443.2	GeneID:4477		51220120
18228	cg18221897	0.829949	-178.124	178.124	1.54032e-18	-0.0325387	32082.8	149	0.141653	0.862487	0	1	32328.5	149	0.088866	KIR2DL1	19	NKAT; 47.11; CL-42; NKAT1; p58.1; CD158A; KIR-K3; KIR-K9; KIR221; KIR-K64; KIR-K65;	NM_014218.1	GeneID:3802		59973958
1274	cg01265637	0.838691	-178.038	178.038	1.57112e-18	-0.0315434	10646.9	149	0.133555	0.870235	0	1	10663	149	0.0779138	C20orf141	20	MGC26144; dJ860F19.4;	NM_080739.2	GeneID:128653		2743930
2836	cg02833725	0.705	-177.995	177.995	1.58657e-18	-0.0443245	19686.4	149	0.189838	0.749325	0	1	19932.9	149	0.120689	ISG20L2	1	FLJ12671;	NM_030980.1	GeneID:81875		154963392
18774	cg18771300	0.460203	-177.953	177.953	1.60229e-18	-0.054247	9915.98	149	0.19159	0.51445	0	1	9877.38	149	0.207633	RHOJ	14	TCL; ARHJ; TC10B; RASL7B; FLJ14445;	NM_020663.2	GeneID:57381	14:62741321-62741574	62741490
19902	cg19910382	0.774941	-177.953	177.953	1.60229e-18	-0.0382523	7525.93	149	0.191327	0.813194	0	1	7716.77	149	0.121502	FABP1	2	FABPL; L-FABP;	NM_001443.1	GeneID:2168		88208676
21507	cg21518947	0.687397	-177.657	177.657	1.71514e-18	-0.0455896	24782.3	149	0.215045	0.732987	0	1	24652.7	149	0.136912	CABP4	11		NM_145200.2	GeneID:57010		66979224
26611	cg26647600	0.692628	-177.536	177.536	1.76356e-18	-0.0451957	5297.21	149	0.209437	0.737823	0	1	5312.22	149	0.134392	CCR8	3	CY6; TER1; CKRL1; CDw198; CKR-L1; CMKBR8; CMKBRL2; GPR-CY6; MGC129966; MGC129973;	NM_005201.2	GeneID:1237		39344724
17919	cg17894008	0.879776	-177.37	177.37	1.8324e-18	-0.0265764	12615.6	149	0.107196	0.906353	0	1	12654.1	149	0.0636445	NACAL	17	ANAC; NACA2; MGC71999;	NM_199290.2	GeneID:342538	17:57023173-57023543	57023386
367	cg00350478	0.682358	-177.179	177.179	1.91474e-18	-0.0458867	20584.5	149	0.202456	0.728245	0	1	21183	149	0.125636	FRMD1	6	FLJ00181; FLJ22615; FLJ40260; bA164L23.1; DKFZp434O0117;	NM_024919.2	GeneID:79981		168222862
13838	cg13882988	0.720202	-177.179	177.179	1.91474e-18	-0.0430281	4574.82	149	0.184737	0.76323	0	1	4573.63	149	0.118528	MBL2	10	MBL; MBP; MBP1; COLEC1; HSMBPC; MGC116832; MGC116833;	NM_000242.1	GeneID:4153		54201351
1343	cg01333788	0.764828	-177.087	177.087	1.95569e-18	-0.0391231	12332.4	149	0.17382	0.803951	0	1	12338.2	149	0.106293	GJB5	1	CX31.1;	NM_005268.2	GeneID:2709		34993401
414	cg00406844	0.736142	-177.047	177.047	1.97379e-18	-0.0416849	13130.1	149	0.207154	0.777827	0	1	13031.7	149	0.129773	RFPL3	22		NM_006604.1	GeneID:10738		31083939
15420	cg15423764	0.725809	-176.999	176.999	1.99581e-18	-0.0425466	3685.91	149	0.188934	0.768356	0	1	3792.61	149	0.122341	GLYAT	11	CAT; GAT; ACGNAT;	NM_005838.2	GeneID:10249		58256109
3633	cg03608577	0.778008	-176.782	176.782	2.09788e-18	-0.0378346	7241.72	149	0.173503	0.815843	0	1	7176.88	149	0.102017	OR12D3	6	hs6M1-27; MGC119267;	NM_030959.2	GeneID:81797		29450658
22855	cg22889448	0.781748	-176.756	176.756	2.11057e-18	-0.0374664	11520.9	149	0.176168	0.819214	0	1	11603.9	149	0.105998	EMR1	19	TM7LN3;	NM_001974.3	GeneID:2015		6837962
9526	cg09585781	0.674194	-176.503	176.503	2.23723e-18	-0.0463626	18440.3	149	0.19874	0.720556	0	1	18693.7	149	0.126002	CSH2	17	CSB; CS-2; hCS-B;	NM_020991.3	GeneID:1443		59304868
23253	cg23274244	0.783032	-176.119	176.119	2.44416e-18	-0.0372776	8593.63	149	0.169125	0.820309	0	1	8549.26	149	0.101572	TNFRSF13B	17	TACI; CD267; MGC39952; MGC133214; TNFRSF14B;	NM_012452.2	GeneID:23495		16816676
21765	cg21770617	0.799301	-175.467	175.467	2.84014e-18	-0.0355812	22939	149	0.159173	0.834882	0	1	23030.4	149	0.0956113	FAM3D	3	EF7; OIT1;	NM_138805.2	GeneID:131177		58627937
3550	cg03533058	0.847397	-175.418	175.418	2.87217e-18	-0.030326	16521.6	149	0.147322	0.877723	0	1	16646	149	0.094521	NR4A1	12	HMR; N10; TR3; NP10; GFRP1; NAK-1; NGFIB; NUR77; MGC9485;	NM_002135.3	GeneID:3164		50723838
12616	cg12682367	0.647851	-175.412	175.412	2.87614e-18	-0.0479025	13413.1	149	0.20772	0.695754	0	1	13570.9	149	0.130597	FLJ46358	13		NM_207439.2	GeneID:400110		23421698
5329	cg05322019	0.847594	-175.304	175.304	2.94815e-18	-0.0302927	16749.7	149	0.146684	0.877886	0	1	16488	149	0.0945386	SEMA4G	10	FLJ20590; KIAA1619;	NM_017893.2	GeneID:57715		102722313
17775	cg17754680	0.735866	-175.304	175.304	2.94815e-18	-0.0415129	15096.2	149	0.195708	0.777379	0	1	15097.4	149	0.124402	NPC1L1	7		NM_013389.1	GeneID:29881		44548356
24223	cg24278076	0.797749	-174.574	174.574	3.48811e-18	-0.0356542	4600.36	149	0.163292	0.833403	0	1	4700.44	149	0.10647	PLS1	3	I-PLASTIN;	NM_002670.1	GeneID:5357		143823621
16851	cg16799087	0.784468	-174.557	174.557	3.50195e-18	-0.0369812	9768.37	149	0.171736	0.821449	0	1	9548.35	149	0.107752	PRDM7	16	PFM4;	NM_052996.2	GeneID:11105		88655862
7115	cg07115820	0.620087	-174.309	174.309	3.70766e-18	-0.0493007	15832.1	149	0.190732	0.669387	0	1	16236.5	149	0.121368	EPX	17	EPO; EPP; EPX-PEN;	NM_000502.2	GeneID:8288		53625248
27490	cg27557796	0.821143	-174.262	174.262	3.74757e-18	-0.0331662	18031.3	149	0.1547	0.854309	0	1	17695.6	149	0.0946742	LY6G6C	6	G6c; NG24; C6orf24;	NM_025261.1	GeneID:80740		31796681
13568	cg13625403	0.910519	-174.14	174.14	3.85487e-18	-0.0224127	12639.6	149	0.10501	0.932932	0	1	12714.8	149	0.0679957	TRIM29	11	ATDC;	NM_058193.1	GeneID:23650	11:119513136-119513923	119513720
18831	cg18839416	0.683688	-173.906	173.906	4.06846e-18	-0.0453863	9965.43	149	0.19709	0.729074	0	1	9951.95	149	0.121091	C1orf158	1	MGC35194; DKFZp686C0236; RP11-474O21.4;	NM_152290.1	GeneID:93190		12728436
3748	cg03731898	0.679614	-173.843	173.843	4.12743e-18	-0.04566	2835.38	149	0.198861	0.725274	0	1	2798.3	149	0.129845	CPO	2		NM_173077.1	GeneID:130749		207512326
16633	cg16558203	0.767137	-173.787	173.787	4.18158e-18	-0.0385607	6880.47	149	0.188261	0.805698	0	1	6885.64	149	0.118804	SLC22A14	3	OCTL2; OCTL4; ORCTL4;	NM_004803.2	GeneID:9389		38322396
24296	cg24346637	0.788309	-173.738	173.738	4.22854e-18	-0.0365188	16641.9	149	0.184884	0.824828	0	1	16166.1	149	0.117165	UBL4B	1	FLJ25690;	NM_203412.1	GeneID:164153		110456815
10929	cg11015241	0.845236	-173.699	173.699	4.26648e-18	-0.0304325	7008.3	149	0.162412	0.875668	0	1	6941.39	149	0.102202	ATP10A	15	ATPVA; ATPVC; ATP10C; KIAA0566;	NT_026446.13	GeneID:57194	15:23577189-23577798	23577342
12146	cg12207371	0.672038	-173.671	173.671	4.29467e-18	-0.0461472	3103.18	149	0.19183	0.718186	0	1	3137.68	149	0.128292	CD163	12	M130; MM130;	NM_004244.3	GeneID:9332		7547070
14660	cg14659547	0.777324	-173.655	173.655	4.31062e-18	-0.0375804	11007.3	149	0.189091	0.814904	0	1	10860	149	0.115638	RETNLB	3	XCP2; FIZZ1; FIZZ2; HXCP2; RELMb; RELMbeta; RELM-beta;	NM_032579.1	GeneID:84666		109958816
12827	cg12878228	0.730091	-173.576	173.576	4.38915e-18	-0.041798	15007.6	149	0.222139	0.771889	0	1	14974.4	149	0.137862	PRSS1	7	TRP1; TRY1; TRY4; TRYP1; MGC120175;	NM_002769.2	GeneID:5644		142135698
22218	cg22241124	0.673698	-173.437	173.437	4.53231e-18	-0.0460053	8100.37	149	0.214005	0.719704	0	1	8101.26	149	0.133432	CNGA3	2	CNG3; ACHM2; CCNC1; CCNCa; CNCG3; CCNCalpha;	NM_001298.1	GeneID:1261		98352807
17710	cg17703554	0.784666	-173.226	173.226	4.75817e-18	-0.0368244	4583.97	149	0.169549	0.82149	0	1	4587.52	149	0.108161	WDR21C	8	FLJ35775;	NM_152418.2	GeneID:138009	8:88954770-88955987	88955455
19034	cg19033555	0.760581	-173.224	173.224	4.76014e-18	-0.0391025	7515.05	149	0.195308	0.799683	0	1	7559.72	149	0.121127	DEFB1	8	BD1; HBD1; DEFB-1; DEFB101; MGC51822;	NM_005218.3	GeneID:1672		6723795
2387	cg02347487	0.590079	-173.115	173.115	4.8809e-18	-0.0505372	11044.6	149	0.191837	0.640616	0	1	11326.7	149	0.125209	NALP14	11	NOD5; GC-LRR;	NM_176822.2	GeneID:338323		7015679
1891	cg01871963	0.831344	-172.43	172.43	5.71479e-18	-0.0318865	16976.1	149	0.143563	0.863231	0	1	16968.5	149	0.0895858	LCN2	9	NGAL;	NM_005564.2	GeneID:3934		129950816
18550	cg18538812	0.693398	-172.43	172.43	5.71479e-18	-0.0445092	9342.82	149	0.219505	0.737907	0	1	9001.58	149	0.134656	GIF	11	IF; INF; IFMH; TCN3;	NM_005142.2	GeneID:2694		59370671
22195	cg22220722	0.734641	-172.157	172.157	6.08583e-18	-0.0412574	14067.2	149	0.198252	0.775898	0	1	14067.7	149	0.122681	PLA2G2A	1	MOM1; PLA2; PLA2B; PLA2L; PLA2S; PLAS1; sPLA2;	NM_000300.2	GeneID:5320		20179228
9993	cg10073042	0.710636	-171.88	171.88	6.48605e-18	-0.0431561	13023.5	149	0.195419	0.753792	0	1	12691.3	149	0.120082		22			GeneID:616		21303200
1581	cg01564343	0.776301	-171.478	171.478	7.1159e-18	-0.0374559	17293.8	149	0.170304	0.813757	0	1	17493.5	149	0.116012	TREML1	6	TLT1; TLT-1; PRO3438; GLTL1825; MGC119173; dJ238O23.3;	NM_178174.2	GeneID:340205		41229898
1215	cg01197831	0.801019	-171.367	171.367	7.29995e-18	-0.0350092	9621.32	149	0.150035	0.836028	0	1	9818.53	149	0.0930933	FBP2	9		NM_003837.2	GeneID:8789	9:96395689-96395929	96395762
12658	cg12718562	0.804409	-170.713	170.713	8.48653e-18	-0.0346016	8234.68	149	0.156771	0.83901	0	1	8217.8	149	0.0965215	TBC1D21	15	MGC34741;	NM_153356.1	GeneID:161514		71952914
12272	cg12348970	0.774523	-170.679	170.679	8.55323e-18	-0.0375428	4170.17	149	0.160436	0.812066	0	1	4140.14	149	0.102115	SLC24A2	9	NCKX2;	NM_020344.1	GeneID:25769		19776543
27218	cg27278802	0.851618	-170.642	170.642	8.62522e-18	-0.0294505	24619.1	149	0.13291	0.881068	0	1	24740.3	149	0.0845519	CCS	11		NM_005125.1	GeneID:9973		66116006
20476	cg20526800	0.715774	-170.58	170.58	8.75004e-18	-0.0426033	22801.5	149	0.172312	0.758378	0	1	22738	149	0.108055	C20orf128	20	FAM83C; dJ614O4.7;	NM_178468.2	GeneID:128876		33344239
24198	cg24252809	0.722894	-170.482	170.482	8.94911e-18	-0.0420278	7385.27	149	0.170274	0.764922	0	1	7500.77	149	0.108584	MRGPRX1	11	GPCR; MRGX1; SNSR4;	NM_147199.2	GeneID:259249		18914027
25205	cg25211252	0.703898	-170.101	170.101	9.77035e-18	-0.0434541	21058.2	149	0.167325	0.747353	0	1	21392.9	149	0.103068	KCNMB3	3	KCNMB2; KCNMBL;	NM_014407.3	GeneID:27094	3:180467337-180467703	180467491
5648	cg05657520	0.801485	-170.063	170.063	9.85553e-18	-0.0348363	6601.72	149	0.165468	0.836322	0	1	6509.25	149	0.106626	OPTC	1	OPT;	NM_014359.3	GeneID:26254		201729144
9316	cg09395732	0.805817	-169.893	169.893	1.02492e-17	-0.0343773	21276.2	149	0.137438	0.840194	0	1	21173	149	0.0894242	SLC6A11	3	GAT3; GAT-3;	NM_014229.1	GeneID:6538	3:10832452-10833630	10832456
8397	cg08448751	0.853211	-169.768	169.768	1.05478e-17	-0.0291956	12120.9	149	0.113886	0.882407	0	1	12214.6	149	0.0649132	SEMA3G	3	sem2; FLJ00014; MGC119473;	NM_020163.1	GeneID:56920		52454641
19089	cg19103609	0.652394	-169.758	169.758	1.0574e-17	-0.0468809	8584.7	149	0.20679	0.699275	0	1	8776.56	149	0.1278	PKN1	19	DBK; PKN; PAK1; PRK1; PRKCL1; MGC46204;	NM_002741.3	GeneID:5585	19:14403590-14405780	14404524
26040	cg26062856	0.722338	-169.732	169.732	1.06356e-17	-0.0419828	24442.6	149	0.214977	0.764321	0	1	24788	149	0.136479	ATP10A	15	ATPVA; ATPVC; ATP10C; KIAA0566;	NM_024490.2	GeneID:57194	15:23658498-23660531	23660518
18546	cg18534730	0.630944	-169.442	169.442	1.13708e-17	-0.0480598	9680.1	149	0.19054	0.679004	0	1	9765.31	149	0.12323	CABP5	19		NM_019855.3	GeneID:56344		53239260
5814	cg05823029	0.773689	-169.417	169.417	1.14367e-17	-0.037487	30222.4	149	0.157788	0.811176	0	1	30221.1	149	0.0984353	ATP4B	13	ATP6B;	NM_000705.2	GeneID:496		113360759
3864	cg03835296	0.699554	-169.309	169.309	1.17244e-17	-0.0436758	5833.97	149	0.188009	0.74323	0	1	5561.8	149	0.118796	SLC17A1	6	NPT1; NPT-1; NAPI-1; MGC126794; MGC126796;	NM_005074.1	GeneID:6568		25938901
20025	cg20047055	0.675909	-169.239	169.239	1.19141e-17	-0.0453216	19911.6	149	0.214468	0.721231	0	1	20144.9	149	0.134595	KLRC1	12	NKG2; NKG2A; CD159A; MGC13374; MGC59791;	NM_002259.3	GeneID:3821		10499334
13098	cg13181284	0.824119	-169.233	169.233	1.19319e-17	-0.0323898	13933.4	149	0.143538	0.856509	0	1	13894	149	0.0894759	KRT6B	12	K6B; PC2; CK6B; KRTL1;	NM_005555.2	GeneID:3854		51131954
328	cg00311768	0.825555	-169.152	169.152	1.21565e-17	-0.0322276	8496.93	149	0.148232	0.857782	0	1	8435.42	149	0.0888229	TSTA3	8	FX; P35B;	NM_003313.2	GeneID:7264		144770000
3042	cg03022541	0.721116	-169.037	169.037	1.24825e-17	-0.0419956	23659.2	149	0.197695	0.763112	0	1	23894.6	149	0.119875	DNAJB8	3	MGC33884;	NM_153330.2	GeneID:165721		129669549
15000	cg15001372	0.792352	-168.869	168.869	1.29763e-17	-0.0356311	14131.2	149	0.172448	0.827983	0	1	14051	149	0.10905	GCK	7	GK; GLK; HK4; HKIV; HXKP; MODY2;	NM_000162.2	GeneID:2645		44196417
20819	cg20862496	0.870087	-168.756	168.756	1.33168e-17	-0.0271315	15904.7	149	0.114885	0.897219	0	1	15855.5	149	0.0660771	SLURP1	8	ARS; MDM; ANUP; ArsB; LY6LS;	NM_020427.2	GeneID:57152		143820736
20743	cg20791593	0.822921	-168.585	168.585	1.38516e-17	-0.0324583	12072.4	149	0.145308	0.855379	0	1	12097.6	149	0.0911818	NEU4	2	MGC18222; MGC102757;	NM_080741.1	GeneID:129807		242400469
25345	cg25366404	0.749409	-168.585	168.585	1.38516e-17	-0.0395907	26137.9	149	0.168404	0.789	0	1	26561.8	149	0.105393	MOCS1	6	MIG11; MOCOD; MOCS1A; MOCS1B; KIAA0381;	NM_138928.1	GeneID:4337		40003338
16861	cg16812893	0.676588	-168.492	168.492	1.41514e-17	-0.0451773	10310.2	149	0.207688	0.721766	0	1	10385.5	149	0.127628	KRTAP15-1	21	KAP15.1;	NM_181623.1	GeneID:254950		30734946
42	cg00037763	0.815045	-168.433	168.433	1.4345e-17	-0.0332775	10290	149	0.156823	0.848322	0	1	10210	149	0.0983211	SETBP1	18	SEB; KIAA0437;	NM_015559.1	GeneID:26040		40535761
24840	cg24875415	0.809841	-168.394	168.394	1.44744e-17	-0.033815	7168.72	149	0.145208	0.843656	0	1	6949.61	149	0.0886764	CST4	20	MGC71923;	NM_001899.2	GeneID:1472		23617470
597	cg00573606	0.84311	-168.208	168.208	1.51095e-17	-0.030212	13892.3	149	0.149683	0.873322	0	1	13654.1	149	0.0893574	COL6A3	2	DKFZp686D23123; DKFZp686K04147;	NM_004369.2	GeneID:1293		237987419
24477	cg24506604	0.676866	-168.015	168.015	1.57932e-17	-0.0450965	9064.47	149	0.2063	0.721963	0	1	8839.54	149	0.130259	LOC144501	12	KB20;	NM_182507.1	GeneID:144501		50865769
24384	cg24433189	0.689504	-167.926	167.926	1.61228e-17	-0.0442199	27590.4	149	0.16594	0.733724	0	1	28106.4	149	0.111216	SSTR5	16		NM_001053.1	GeneID:6755	16:1068532-1070086	1068690
19299	cg19306866	0.751655	-167.851	167.851	1.64033e-17	-0.0393105	5392.96	149	0.172221	0.790965	0	1	5524.61	149	0.109518	KRTAP6-2	21	KAP6.2;	NM_181604.1	GeneID:337967	21:30892865-30893091	30892868
10903	cg10990993	0.697198	-167.834	167.834	1.64676e-17	-0.0436588	4911.89	149	0.203832	0.740857	0	1	4860.41	149	0.130579	MLH1	3	FCC2; COCA2; HNPCC; hMLH1; HNPCC2; MGC5172;	NM_000249.2	GeneID:4292		37008636
774	cg00745543	0.856468	-167.741	167.741	1.68233e-17	-0.0286512	10080	149	0.127438	0.885119	0	1	9990.36	149	0.0734638	H1T2	12		NM_181788.1	GeneID:341567		47009021
25787	cg25813714	0.851766	-167.678	167.678	1.70683e-17	-0.0291863	13773.1	149	0.118258	0.880952	0	1	13444.9	149	0.072513	CYP4F12	19	F22329_1;	NM_023944.1	GeneID:66002		15643945
10875	cg10968815	0.823959	-167.572	167.572	1.74896e-17	-0.0322526	8711.88	149	0.13346	0.856212	0	1	8748.4	149	0.0821467	BPIL1	20	RYSR; LPLUNC2; C20orf184; dJ726C3.2;	NM_025227.1	GeneID:80341		31059007
20678	cg20725021	0.738783	-167.408	167.408	1.81652e-17	-0.0403604	17762.8	149	0.166745	0.779143	0	1	17646.4	149	0.100721	MASP1	3	MASP; RaRF; CRARF; PRSS5; CRARF1; FLJ26383; MGC126283; MGC126284; DKFZp686I01199;	NM_001879.4	GeneID:5648		188492269
16350	cg16272420	0.742461	-167.376	167.376	1.82991e-17	-0.0400463	12355.7	149	0.194638	0.782507	0	1	12219	149	0.118819	PNLIPRP2	10	PLRP2;	NM_005396.3	GeneID:5408		118371034
19778	cg19795898	0.751472	-167.341	167.341	1.84463e-17	-0.0392669	10567.9	149	0.178072	0.790739	0	1	10479	149	0.111297	KIAA1984	9	PARF; MGC15438; bA216L13.7; RP11-216L13.7; RP11-216L13.9;	NM_032874.2	GeneID:84960		138813017
20975	cg21022395	0.676472	-167.335	167.335	1.84727e-17	-0.0450301	3702.41	149	0.185768	0.721502	0	1	3853.43	149	0.122219	SHOC2	10	SOC2; SUR8; SOC-2; SUR-8; KIAA0862; SIAA0862;	NM_007373.2	GeneID:8036		112712430
10507	cg10585962	0.72576	-167.191	167.191	1.90955e-17	-0.0414003	20820.8	149	0.195826	0.767161	0	1	20695.6	149	0.128434	MOGAT2	11	MGAT2; DGAT2L5; FLJ22644; MGC119183; MGC119184; MGC119185;	NM_025098.2	GeneID:80168		75105846
19286	cg19290962	0.679894	-167.135	167.135	1.93406e-17	-0.044775	9638.97	149	0.197213	0.724669	0	1	9725.59	149	0.121838	TMC2	20	C20orf145; dJ686C3.3;	NM_080751.1	GeneID:117532		2465613
17313	cg17277939	0.855966	-166.973	166.973	2.0078e-17	-0.0286451	7633.41	149	0.118098	0.884611	0	1	7948.6	149	0.0723846	MGC13168	12		NM_032735.1	GeneID:84821	12:68379242-68379452	68379275
7769	cg07810156	0.805655	-166.919	166.919	2.03264e-17	-0.0340991	17448.9	149	0.150426	0.839754	0	1	17317.8	149	0.0931998	PDZK1IP1	1	DD96; SPAP; MAP17; RP1-18D14.5;	NM_005764.3	GeneID:10158		47428269
4862	cg04802221	0.755507	-166.695	166.695	2.14052e-17	-0.0388398	8392.94	149	0.185519	0.794347	0	1	8247.41	149	0.117698	LOC283849	16	MGC88052;	NM_178516.2	GeneID:283849		65781456
7187	cg07197059	0.759004	-166.404	166.404	2.28881e-17	-0.0384985	15713.1	149	0.185379	0.797502	0	1	15399.9	149	0.111129	EFS	14	SIN; EFS1; EFS2; HEFS;	NM_032459.1	GeneID:10278	14:22905387-22905899	22905852
23076	cg23110514	0.643661	-166.218	166.218	2.38902e-17	-0.0469047	4066.22	149	0.161799	0.690566	0	1	4129.94	149	0.100919	LCE3E	1	LEP17;	NM_178435.2	GeneID:353145		150805512
6255	cg06285340	0.82055	-166.023	166.023	2.49856e-17	-0.0324717	20958.3	149	0.159685	0.853021	0	1	21049.2	149	0.100466	CYP11A1	15	CYP11A; P450SCC;	NM_000781.1	GeneID:1583		72446954
10124	cg10207745	0.636175	-165.963	165.963	2.53344e-17	-0.0472873	7860.52	149	0.19933	0.683462	0	1	7649.73	149	0.124798	C12orf36	12	FLJ33810; MGC120140;	NM_182558.1	GeneID:283422		13421230
19969	cg19982860	0.834632	-165.929	165.929	2.55329e-17	-0.0309506	13811.6	149	0.146834	0.865582	0	1	13721.3	149	0.0897068	IFNA21	9		NM_002175.1	GeneID:3452		21156581
16671	cg16609872	0.755122	-165.797	165.797	2.63196e-17	-0.0387738	15016.4	149	0.188672	0.793896	0	1	14912.4	149	0.115398	KCNQ1	11	LQT; RWS; WRS; LQT1; ATFB1; KCNA8; KCNA9; Kv1.9; Kv7.1; KVLQT1;	NT_009237.17	GeneID:3784	11:2784925-2785484	2784940
24319	cg24363955	0.739108	-165.771	165.771	2.64777e-17	-0.0401415	5639.6	149	0.170207	0.77925	0	1	5638.63	149	0.109206	FLJ14054	5		NM_024563.2	GeneID:79614		32824224
19695	cg19717150	0.678666	-165.746	165.746	2.66342e-17	-0.0446763	7679.96	149	0.202016	0.723342	0	1	7779.86	149	0.127342	HNF4A	20	TCF; HNF4; MODY; MODY1; NR2A1; TCF14; HNF4a7; HNF4a8; HNF4a9; NR2A21; FLJ39654;	NM_000457.3	GeneID:3172	20:42418188-42418589	42418292
3306	cg03287877	0.724787	-165.745	165.745	2.66373e-17	-0.0413036	3817.82	149	0.19816	0.766091	0	1	3874.52	149	0.126839	DCAKD	17	FLJ22955;	NM_024819.3	GeneID:79877		40495352
13428	cg13493001	0.817896	-165.745	165.745	2.66373e-17	-0.0327218	17385.8	149	0.129044	0.850618	0	1	17357.6	149	0.0836786	LCN12	9	MGC34753; MGC48935;	NM_178536.2	GeneID:286256		138965921
11012	cg11091262	0.708626	-165.645	165.645	2.72577e-17	-0.0425391	6336.08	149	0.184208	0.751165	0	1	6401.15	149	0.11568	GALNTL5	7	GALNT15;	NM_145292.2	GeneID:168391		151284387
25355	cg25372195	0.683893	-165.198	165.198	3.02148e-17	-0.0442531	10446.9	149	0.206121	0.728146	0	1	10410.1	149	0.126479	DCD	12	PIF; AIDD; DSEP; MGC71930;	NM_053283.1	GeneID:117159		53328560
2216	cg02192965	0.718607	-165.151	165.151	3.05415e-17	-0.041718	4617.12	149	0.194842	0.760325	0	1	4587.6	149	0.125018	SLC3A1	2	D2H; ATR1; NBAT; RBAT; CSNU1;	NM_000341.2	GeneID:6519		44356244
9418	cg09480837	0.752277	-165.124	165.124	3.07334e-17	-0.0389446	10688	149	0.1887	0.791221	0	1	10685.4	149	0.116825	PLCE1	10	PLCE; KIAA1516;	NM_016341.2	GeneID:51196		95779491
11444	cg11504740	0.844274	-165.075	165.075	3.10814e-17	-0.0298105	23464.8	149	0.124775	0.874084	0	1	23378	149	0.0808895	GPR152	11	PGR5;	NM_206997.1	GeneID:390212		66976619
22144	cg22181664	0.693177	-165.042	165.042	3.13155e-17	-0.0435876	5577.92	149	0.173184	0.736765	0	1	5544.99	149	0.110442	CLCA1	1	CaCC;	NM_001285.1	GeneID:1179		86706913
23727	cg23765993	0.709769	-165.041	165.041	3.13278e-17	-0.0423774	4616.5	149	0.202197	0.752147	0	1	4642.27	149	0.130589	SPINLW1	20	WAP7; EPPIN; WFDC7; EPPIN1; EPPIN2; EPPIN3; dJ461P17.2;	NM_181502.1	GeneID:57119		43609443
5494	cg05484458	0.703244	-164.943	164.943	3.20428e-17	-0.0428496	11055.2	149	0.199468	0.746093	0	1	10983.8	149	0.122992	GNB3	12		NM_002075.2	GeneID:2784		6819521
7966	cg07997737	0.67654	-164.656	164.656	3.42271e-17	-0.0446725	7972.53	149	0.192576	0.721213	0	1	7827.32	149	0.121577	NRTN	19	NTN;	NM_004558.2	GeneID:4902	19:5773093-5773663	5773630
16989	cg16953612	0.827385	-164.476	164.476	3.56812e-17	-0.0316005	27317.3	149	0.150802	0.858985	0	1	27280.8	149	0.0954098	DNAJB8	3	MGC33884;	NM_153330.2	GeneID:165721		129668380
14995	cg14992108	0.780556	-164.393	164.393	3.63655e-17	-0.036302	6716.82	149	0.172412	0.816858	0	1	6609.19	149	0.107167	SNTB1	8	A1B; SNT2; BSYN2; 59-DAP; DAPA1B; SNT2B1; TIP-43; FLJ22442; MGC111389;	NM_021021.2	GeneID:6641		121894651
27024	cg27069753	0.709617	-164.253	164.253	3.75595e-17	-0.0422921	17808.4	149	0.207763	0.751909	0	1	18066.9	149	0.13144	ELA3B	1		NM_007352.2	GeneID:23436		22176158
19523	cg19530885	0.725191	-164.21	164.21	3.79324e-17	-0.0410857	6349.52	149	0.20941	0.766277	0	1	6349.73	149	0.130769	SCGB3A2	5	LU103; PNSP1; UGRP1;	NM_054023.2	GeneID:117156		147238325
27444	cg27513764	0.748358	-164.098	164.098	3.89189e-17	-0.0391642	4455.72	149	0.205261	0.787522	0	1	4401.52	149	0.12911	EFCAB3	17	FLJ25818; MGC126801; MGC126827;	NM_173503.1	GeneID:146779		57811693
3873	cg03843951	0.779775	-164.049	164.049	3.93641e-17	-0.0363383	22739.2	149	0.172028	0.816114	0	1	22877	149	0.10879	DDC	7	AADC;	NM_000790.2	GeneID:1644		50597128
2727	cg02721374	0.785156	-163.93	163.93	4.04595e-17	-0.0358162	7290.4	149	0.166427	0.820973	0	1	7252.01	149	0.103627	OR1D2	17	OLFR1; OR17-4; MGC119942; MGC119943;	NM_002548.1	GeneID:4991		2942927
7030	cg07039362	0.766129	-163.79	163.79	4.17802e-17	-0.0375676	11739.5	149	0.160485	0.803696	0	1	11775	149	0.100212	CES7	16	CAUXIN; FLJ31547;	NM_145024.1	GeneID:221223		54466371
24762	cg24794992	0.730692	-163.775	163.775	4.19228e-17	-0.0405928	6476.91	149	0.189793	0.771285	0	1	6733.63	149	0.119627	OTOA	16	DFNB22; FLJ32773; MGC39813;	NM_170664.1	GeneID:146183		21597398
20752	cg20797216	0.707553	-163.549	163.549	4.41672e-17	-0.0423573	15771.3	149	0.205953	0.74991	0	1	15570.7	149	0.129629	FBN3	19	KIAA1776;	NM_032447.3	GeneID:84467		8118234
6999	cg07014174	0.660343	-163.488	163.488	4.47878e-17	-0.0455433	4056.84	149	0.196841	0.705887	0	1	3996.95	149	0.127957	KRTAP11-1	21	KAP11.1;	NM_175858.2	GeneID:337880		31175631
18442	cg18432384	0.841349	-163.295	163.295	4.68296e-17	-0.0299796	11854	149	0.12881	0.871329	0	1	11687	149	0.0747017	FLJ32771	11		NM_145017.1	GeneID:220004		61004660
11641	cg11706111	0.818204	-163.185	163.185	4.80341e-17	-0.0324471	13759.2	149	0.14574	0.850651	0	1	14024.9	149	0.0860975	ZNF19	16	KOX12; MGC51021;	NM_006961.2	GeneID:7567	16:70080524-70081125	70080645
17564	cg17542495	0.697353	-163.028	163.028	4.97943e-17	-0.0430336	26077.7	149	0.208386	0.740387	0	1	26743.9	149	0.131249	GJB1	X	CMTX; CX32; CMTX1;	NM_000166.2	GeneID:2705	X:70359536-70359838	70359726
1926	cg01909245	0.706395	-162.99	162.99	5.02377e-17	-0.0423725	8646.29	149	0.175436	0.748768	0	1	8660.67	149	0.111162	LSP1	11	WP34; pp52;	NM_002339.2	GeneID:4046		1830333
25095	cg25107791	0.724742	-162.865	162.865	5.17023e-17	-0.0409576	7742.7	149	0.181548	0.7657	0	1	7508.64	149	0.10952	CLPS	6		NM_001832.2	GeneID:1208		35872936
26408	cg26424956	0.784199	-162.865	162.865	5.17023e-17	-0.0357948	22700.7	149	0.16447	0.819994	0	1	22490.5	149	0.105797	GRM4	6	mGlu4; GPRC1D; MGLUR4;	NM_000841.1	GeneID:2914		34209504
4566	cg04520391	0.765802	-162.856	162.856	5.18132e-17	-0.0374924	6326.86	149	0.150956	0.803295	0	1	6248.1	149	0.0945716	PRB2	12	Ps; cP7; PRPPRB1;	NM_006248.1	GeneID:440083		11399184
12474	cg12554573	0.67122	-162.626	162.626	5.46236e-17	-0.0447468	15930.4	149	0.210504	0.715967	0	1	16191.7	149	0.128443	PARP3	3	IRT1; ADPRT3; ADPRTL2; ADPRTL3; hPARP-3; pADPRT-3;	NM_001003931.1	GeneID:10039		51951707
268	cg00240880	0.830041	-162.592	162.592	5.50541e-17	-0.0311428	11836.4	149	0.139455	0.861184	0	1	11786.5	149	0.0847358	WISP2	20	CCN5; CT58; CTGF-L;	NM_003881.2	GeneID:8839		42776647
20134	cg20158826	0.763602	-162.413	162.413	5.73746e-17	-0.0376408	21291.2	149	0.188328	0.801243	0	1	21420.9	149	0.124957	CCS	11		NM_005125.1	GeneID:9973		66116065
9773	cg09863066	0.606042	-162.253	162.253	5.95278e-17	-0.0482629	26606.3	149	0.194053	0.654305	0	1	27241.8	149	0.126503	PVALB	22	D22S749; MGC116759;	NM_002854.2	GeneID:5816		35544810
17860	cg17833578	0.642335	-162.192	162.192	6.03657e-17	-0.0464162	6881.59	149	0.202576	0.688751	0	1	6883.18	149	0.127827	LRRC21	10	PAL; DKFZP434K091;	NM_015613.1	GeneID:26103		85991540
18461	cg18450227	0.92843	-161.883	161.883	6.48201e-17	-0.0193268	19062.1	149	0.0869518	0.947756	0	1	19297.3	149	0.0529192	MAPK4	18	ERK3; Erk4; PRKM4; p63MAPK;	NM_002747.2	GeneID:5596	18:46444299-46444864	46444635
21587	cg21602160	0.745407	-161.827	161.827	6.56659e-17	-0.0391512	8909.62	149	0.203904	0.784559	0	1	9162.81	149	0.122578	AOC3	17	HPAO; VAP1; VAP-1;	NM_003734.2	GeneID:8639		38256798
21078	cg21111471	0.733184	-161.733	161.733	6.70981e-17	-0.0401477	12615.7	149	0.175532	0.773332	0	1	12336.9	149	0.113183	FLRT1	11	MGC21624;	NM_013280.4	GeneID:23769		63627576
16262	cg16194715	0.807858	-161.624	161.624	6.87955e-17	-0.0333548	11320.8	149	0.156575	0.841213	0	1	11292.8	149	0.0966613	SMAD9	13	MADH6; MADH9; SMAD8A; SMAD8B;	NM_005905.2	GeneID:4093	13:36351769-36352075	36351926
724	cg00691625	0.824244	-160.722	160.722	8.46857e-17	-0.0315878	18585.1	149	0.13983	0.855832	0	1	18538.8	149	0.0882946	NR5A1	9	ELP; SF1; FTZ1; SF-1; AD4BP; FTZF1;	NM_004959.3	GeneID:2516	9:126309430-126309676	126309628
24560	cg24607535	0.740642	-160.663	160.663	8.58401e-17	-0.039416	3501.87	149	0.181667	0.780057	0	1	3562.06	149	0.122552	CDH26	20	VR20;	NM_177980.1	GeneID:60437		57966890
5575	cg05569220	0.651123	-160.622	160.622	8.66583e-17	-0.0457033	30396.6	149	0.210686	0.696827	0	1	31398.1	149	0.134988	FLJ44861	17		NM_207389.1	GeneID:388428		76753468
9372	cg09440243	0.712202	-160.621	160.621	8.66842e-17	-0.0416468	3978.01	149	0.194789	0.753849	0	1	3996.96	149	0.131186	PTPRD	9	HPTP; PTPD; HPTPD; MGC119750; MGC119751; MGC119752; MGC119753; HPTP-DELTA; R-PTP-DELTA;	NM_130391.1	GeneID:5789		9009757
26693	cg26738010	0.879069	-160.511	160.511	8.89078e-17	-0.025434	19533.3	149	0.114492	0.904503	0	1	19801.2	149	0.0701612	CETN1	18	CEN1; CETN;	NM_004066.1	GeneID:1068	18:570046-571049	570188
4276	cg04254916	0.858335	-160.462	160.462	8.99001e-17	-0.0278407	9485.72	149	0.123751	0.886176	0	1	9469.85	149	0.0767404	KRT5	12	K5; CK5; DDD; EBS2; KRT5A;	NM_000424.2	GeneID:3852	12:51200186-51200389	51200314
11396	cg11466837	0.715648	-160.457	160.457	9.00078e-17	-0.041366	8459.83	149	0.200606	0.757014	0	1	8326.79	149	0.124139	TRIM29	11	ATDC;	NM_058193.1	GeneID:23650		119514892
16202	cg16128363	0.842871	-160.397	160.397	9.12641e-17	-0.0295598	8830.34	149	0.129624	0.872431	0	1	8799.61	149	0.0796474	DLGAP1	18	GKAP; DAP-1; hGKAP; SAPAP1; MGC88156; DAP-1-BETA; DAP-1-ALPHA;	NM_004746.2	GeneID:9229		3870558
1918	cg01897036	0.853009	-160.109	160.109	9.75147e-17	-0.0284123	6848.33	149	0.130532	0.881421	0	1	6941.89	149	0.0898816	SCTR	2	SR;	NM_002980.1	GeneID:6344	2:119997791-119998904	119998797
22456	cg22477971	0.717406	-160.016	160.016	9.96277e-17	-0.0411784	6932.77	149	0.185367	0.758584	0	1	6861.43	149	0.119443	C1QB	1		NM_000491.2	GeneID:713		22857181
788	cg00757070	0.678618	-159.655	159.655	1.0826e-16	-0.0438768	15389.3	149	0.206835	0.722495	0	1	15706.4	149	0.127549	UPK2	11		NM_006760.1	GeneID:7379		118332292
18338	cg18338296	0.892728	-159.4	159.4	1.14802e-16	-0.0237084	12075.3	149	0.116052	0.916436	0	1	12086.7	149	0.0820503	THRSP	11	S14; SPOT14; MGC21659;	NM_003251.2	GeneID:7069		77452692
4943	cg04893119	0.732445	-159.374	159.374	1.15499e-16	-0.0399281	4034.85	149	0.176611	0.772373	0	1	4078.68	149	0.106079	PI15	8	P24TI; P25TI; CRISP8; DKFZp686F0366;	NM_015886.3	GeneID:51050		75898856
1530	cg01507173	0.772285	-158.69	158.69	1.35204e-16	-0.0364562	5088.01	149	0.16962	0.808741	0	1	5237.32	149	0.105182	IL1F5	2	FIL1; FIL1D; IL1L1; IL1HY1; IL1RP3; MGC29840; FIL1(DELTA);	NM_012275.2	GeneID:26525		113533133
11443	cg11504739	0.761483	-158.594	158.594	1.38245e-16	-0.037407	10359.9	149	0.152093	0.79889	0	1	10393.4	149	0.092807	SCGB1A1	11	UGB; CC10; CC16; CCSP;	NM_003357.3	GeneID:7356		61942636
13342	cg13412615	0.723503	-158.515	158.515	1.4076e-16	-0.0405298	13211.8	149	0.17868	0.764033	0	1	13152.7	149	0.108965	KCNK4	11	TRAAK; DKFZP566E164;	NM_016611.2	GeneID:50801		63814383
9074	cg09133026	0.807903	-158.465	158.465	1.42393e-16	-0.0330431	13443.1	149	0.167171	0.840946	0	1	13424.7	149	0.098238	RPS6KL1	14	MGC11287;	NM_031464.2	GeneID:83694	14:74457680-74457965	74457858
20401	cg20437604	0.791072	-158.316	158.316	1.4738e-16	-0.0346701	12504.6	149	0.134957	0.825743	0	1	12364.6	149	0.0854672	ANXA9	1	ANX31;	NM_003568.1	GeneID:8416		149221178
11525	cg11608424	0.878306	-158.297	158.297	1.4801e-16	-0.025359	11937.1	149	0.107088	0.903666	0	1	12017.7	149	0.0654862	LOC253012	7		NM_198151.1	GeneID:253012		92687787
23354	cg23382741	0.779959	-158.297	158.297	1.4801e-16	-0.0357106	10549.2	149	0.15242	0.81567	0	1	10530	149	0.0915176	PPP1R14D	15	GBPI-1; FLJ20251; MGC119014; MGC119016; CPI17-like;	NM_017726.6	GeneID:54866		38908612
10844	cg10938286	0.873673	-158.159	158.159	1.52788e-16	-0.0258923	15194.7	149	0.117825	0.899565	0	1	15381	149	0.0785058	CST2	20	MGC71924;	NM_001322.2	GeneID:1470		23754999
17496	cg17470143	0.74097	-157.987	157.987	1.58953e-16	-0.0390738	6609.89	149	0.193527	0.780044	0	1	6727.16	149	0.12383	DCAMKL1	13	DCLK; KIAA0369;	NM_004734.2	GeneID:9201		35604433
14774	cg14774175	0.71354	-157.869	157.869	1.63332e-16	-0.0412047	7066.7	149	0.184107	0.754745	0	1	7003.26	149	0.123066	MAGEB3	X		NM_002365.3	GeneID:4114		30158839
27005	cg27050793	0.836956	-157.789	157.789	1.6638e-16	-0.0299717	12957.2	149	0.131441	0.866928	0	1	12882.8	149	0.0823982	SBSN	19	UNQ698; MGC75533;	NM_198538.1	GeneID:374897		40710765
24796	cg24825722	0.684426	-157.527	157.527	1.76734e-16	-0.0432139	13279	149	0.179817	0.72764	0	1	13445.4	149	0.11257	ACADVL	17	ACAD6; LCACD; VLCAD;	NM_000018.2	GeneID:37		7062572
13039	cg13125510	0.711989	-157.429	157.429	1.80767e-16	-0.041265	10284.2	149	0.192667	0.753254	0	1	10118	149	0.118267	C11orf44	11	FLJ39058;	NM_173580.1	GeneID:283171		130047701
7127	cg07126559	0.801557	-157.378	157.378	1.82898e-16	-0.0335603	8898.48	149	0.137721	0.835117	0	1	8798.03	149	0.0862447	SGCG	13	A4; MAM; DMDA; SCG3; TYPE; DAGA4; DMDA1; LGMD2C; SCARMD2; MGC130048;	NM_000231.1	GeneID:6445		22652937
23316	cg23338993	0.712917	-157.332	157.332	1.84863e-16	-0.041183	7437.81	149	0.206988	0.7541	0	1	7554.29	149	0.129705	UGT1A6	2	GNT1; UGT1; HLUGP; UDPGT; UGT1F; HLUGP1; UGT1*6; MGC29860;	NM_001072.2	GeneID:54578		234265162
2787	cg02786019	0.680163	-157.011	157.011	1.99012e-16	-0.0434257	6300.39	149	0.198007	0.723588	0	1	6255.25	149	0.123679	TRPV6	7	CAT1; CATL; ZFAB; ECAC2; ABP/ZF; LP6728; HSA277909;	NM_018646.2	GeneID:55503		142292981
6084	cg06123346	0.634228	-157.011	157.011	1.99012e-16	-0.0461313	8343.64	149	0.196238	0.68036	0	1	8243.03	149	0.125308	ATP4A	19	ATP6A;	NM_000704.2	GeneID:495		40746359
6356	cg06384491	0.734997	-156.996	156.996	1.99687e-16	-0.0394384	7687.02	149	0.168214	0.774436	0	1	7922.17	149	0.104331	SPIN2	X	DXF34; MGC88670; dJ323P24.1; RP3-323P24.2;	NM_019003.2	GeneID:54466	X:57180226-57180702	57180613
14708	cg14706739	0.818805	-156.547	156.547	2.21483e-16	-0.0317556	15920.8	149	0.130059	0.850561	0	1	15664.3	149	0.0817009	EPB49	8	DMT; DEMATIN;	NM_001978.1	GeneID:2039		21972301
7686	cg07711097	0.872558	-156.298	156.298	2.3452e-16	-0.0258787	15044	149	0.111711	0.898436	0	1	15150.5	149	0.0685344	GML	8	LY6DL;	NM_002066.1	GeneID:2765		143912956
17134	cg17100200	0.869069	-156.145	156.145	2.42935e-16	-0.026269	16496.5	149	0.115671	0.895338	0	1	16523.6	149	0.0748723	GUCA2B	1	UGN; GCAP-II;	NM_007102.1	GeneID:2981		42390900
27524	cg27600794	0.814204	-156.089	156.089	2.46071e-16	-0.0321779	6811.55	149	0.152068	0.846382	0	1	6850.27	149	0.095172	PNLIPRP1	10	PLRP1;	NM_006229.1	GeneID:5407		118339420
17321	cg17288121	0.746377	-155.907	155.907	2.56649e-16	-0.0383843	5097.32	149	0.175851	0.784761	0	1	5054.07	149	0.114001	DEFB103A	8	HBD3; HBP3; DEFB3; HBD-3; HBP-3; DEFB103;	NM_018661.2	GeneID:55894		7275424
22515	cg22545356	0.798352	-155.724	155.724	2.67664e-16	-0.0337044	9894.28	149	0.160633	0.832056	0	1	9603.28	149	0.0988306	MMRN2	10	EMILIN3; FLJ13465; ENDOGLYX1; EndoGlyx-1;	NM_024756.1	GeneID:79812		88706639
21559	cg21572897	0.684652	-155.35	155.35	2.91749e-16	-0.0429133	5720.94	149	0.205188	0.727565	0	1	5614.62	149	0.128434	CD80	3	LAB7; CD28LG; CD28LG1;	NM_005191.2	GeneID:941		120760511
27041	cg27087809	0.739049	-155.324	155.324	2.93481e-16	-0.0389153	8978.9	149	0.154964	0.777964	0	1	8965.47	149	0.0969496	ACSBG1	15	BG1; BGM; hBG1; hsBG; GR-LACS; FLJ30320; KIAA0631; MGC14352;	NM_015162.3	GeneID:23205		76314465
12600	cg12654845	0.718081	-155.282	155.282	2.96333e-16	-0.0405433	3992.79	149	0.187983	0.758625	0	1	3997.57	149	0.119985	CLDN2	X		NM_020384.2	GeneID:9075	X:106049456-106049675	106049665
8442	cg08495878	0.826237	-155.208	155.208	3.01432e-16	-0.0308649	15124.5	149	0.172781	0.857102	0	1	14831.8	149	0.113279	SERPINA4	14	KAL; KST; PI4; KLST; kallistatin;	NM_006215.2	GeneID:5267		94097612
24363	cg24411312	0.817979	-154.918	154.918	3.2227e-16	-0.0316837	14896	149	0.137467	0.849663	0	1	14895.1	149	0.0853673	ST14	11	HAI; MTSP1; SNC19; MT-SP1; MTSP-1; PRSS14; TADG-15;	NM_021978.2	GeneID:6768		129534054
21023	cg21057494	0.802254	-154.416	154.416	3.61785e-16	-0.0331951	16623.2	149	0.153538	0.835449	0	1	16423.2	149	0.0982486	CLEC3B	3	TN; TNA; DKFZp686H17246;	NM_003278.1	GeneID:7123		45041975
12270	cg12346881	0.79502	-154.224	154.224	3.78103e-16	-0.0338705	5853.16	149	0.157099	0.82889	0	1	5908.32	149	0.10118	ZNF300	5	DKFZp686B24204;	NM_052860.1	GeneID:91975		150264078
17855	cg17829936	0.778534	-154.224	154.224	3.78103e-16	-0.0354034	12492.3	149	0.169521	0.813937	0	1	12663.4	149	0.119334	TAAR5	6	PNR; RP11-295F4.5;	NM_003967.1	GeneID:9038		132952374
24994	cg25020850	0.658592	-154.02	154.02	3.96305e-16	-0.04436	12740.6	149	0.203879	0.702952	0	1	12763.4	149	0.126455	RGS8	1		NM_033345.1	GeneID:85397		180908809
26604	cg26644395	0.652351	-154.003	154.003	3.97796e-16	-0.0447181	4134.34	149	0.181834	0.697069	0	1	4184.3	149	0.117075	UCN3	10	SCP; SPC; UCNIII; FLJ21665; MGC119002;	NM_053049.2	GeneID:114131	10:5396811-5397265	5397020
10748	cg10853416	0.618982	-153.985	153.985	3.99503e-16	-0.0464634	11621.4	149	0.178072	0.665446	0	1	11854	149	0.111944	MS4A7	11	CFFM4; MS4A8; 4SPAN2; CD20L4; MGC22368;	NM_021201.4	GeneID:58475		59901851
16576	cg16507522	0.740311	-153.867	153.867	4.10469e-16	-0.0386395	6170.04	149	0.171252	0.778951	0	1	6268.03	149	0.109875	SERPINA3	14	ACT; AACT; GIG24; GIG25; MGC88254;	NM_001085.4	GeneID:12		94147310
17938	cg17910564	0.684624	-153.867	153.867	4.10469e-16	-0.042717	7023.3	149	0.212838	0.727341	0	1	7017.47	149	0.131608	VDAC3	8	HD-VDAC3;	NM_005662.3	GeneID:7419	8:42367847-42369205	42367859
5658	cg05666713	0.736249	-153.855	153.855	4.11623e-16	-0.0389623	30687.3	149	0.192729	0.775212	0	1	30807.6	149	0.12603	DKFZp434B1231	1		NM_178275.3	GeneID:91156		199448506
26377	cg26394380	0.62378	-153.79	153.79	4.1783e-16	-0.0462005	18344.6	149	0.191852	0.66998	0	1	18614.1	149	0.12278	SFTPB	2	SP-B; PSP-B; SFTB3; SFTP3;	NM_000542.2	GeneID:6439		85749512
12555	cg12616487	0.697168	-153.732	153.732	4.23419e-16	-0.0418519	27394.2	149	0.201462	0.73902	0	1	28468.1	149	0.126898	EML3	11	ELP95; FLJ35827;	NM_153265.1	GeneID:256364		62135639
16209	cg16140179	0.662884	-153.651	153.651	4.314e-16	-0.0440507	5376.05	149	0.203016	0.706935	0	1	5381.81	149	0.128724	NURIT	13	FLJ35810;	NM_152719.1	GeneID:220082		45173353
3909	cg03872376	0.705462	-153.479	153.479	4.48869e-16	-0.0412362	4454.28	149	0.2015	0.746698	0	1	4441.27	149	0.130272	ZP4	1	ZBP; ZP1; ZPB;	NM_021186.2	GeneID:57829		236120451
26892	cg26924825	0.803566	-153.479	153.479	4.48869e-16	-0.0329692	10283.5	149	0.153989	0.836536	0	1	10375.2	149	0.0914846	LCAT	16		NM_000229.1	GeneID:3931		66535366
3635	cg03609102	0.587786	-153.357	153.357	4.61658e-16	-0.04772	29211	149	0.189206	0.635506	0	1	29641.7	149	0.124451	MUC5B	11		XM_039877.12	GeneID:4587	11:1200863-1201126	1201109
15979	cg15903395	0.748135	-153.268	153.268	4.71162e-16	-0.0379268	8104.66	149	0.176607	0.786062	0	1	8115.44	149	0.102836	FLJ25369	2		NM_152670.1	GeneID:200523		88605268
4673	cg04618528	0.863145	-153.165	153.165	4.8247e-16	-0.0267001	15239.6	149	0.104622	0.889845	0	1	15389.8	149	0.0650464	KRTHA6	17	HA6; hHa6;	NM_003771.3	GeneID:8689	17:36899183-36899440	36899402
15740	cg15712267	0.804056	-153.165	153.165	4.8247e-16	-0.0328886	6582.88	149	0.141763	0.836945	0	1	6601.72	149	0.09674	DNAJB1	19	HSPF1; Hsp40;	NM_006145.1	GeneID:3337	19:14489253-14491235	14490905
17137	cg17103109	0.724854	-153.16	153.16	4.83059e-16	-0.0397624	2710.89	149	0.173525	0.764617	0	1	2821.96	149	0.118359	HLA-DOB	6	DOB;	NM_002120.2	GeneID:3112		32893119
15759	cg15736336	0.790459	-153.076	153.076	4.9255e-16	-0.0341753	5985.82	149	0.150461	0.824634	0	1	6102.19	149	0.0938325	PLCZ1	12	NYD-SP27;	NM_033123.2	GeneID:89869		18782481
24875	cg24908058	0.891214	-153.032	153.032	4.97462e-16	-0.0234385	21784.8	149	0.101911	0.914653	0	1	22138.5	149	0.0621573	CGB5	19	HCG;	NM_033043.1	GeneID:93659		54239014
25208	cg25214366	0.779736	-153.015	153.015	4.99436e-16	-0.0351564	9731.47	149	0.178551	0.814893	0	1	9740.27	149	0.112382	DEFB103A	8	HBD3; HBP3; DEFB3; HBD-3; HBP-3; DEFB103;	NM_018661.2	GeneID:55894		7275083
27439	cg27508002	0.82653	-152.89	152.89	5.14067e-16	-0.0306127	10376.3	149	0.134994	0.857143	0	1	10471.5	149	0.0851465	SMAD9	13	MADH6; MADH9; SMAD8A; SMAD8B;	NM_005905.2	GeneID:4093	13:36351769-36352075	36352023
18157	cg18140857	0.880061	-152.884	152.884	5.1479e-16	-0.0247415	25333.8	149	0.11029	0.904802	0	1	25355.8	149	0.0653304	RDHE2	8	RDH#2; RDH-E2; FLJ33105;	NM_138969.2	GeneID:195814	8:57396265-57396478	57396428
8016	cg08045757	0.770961	-152.813	152.813	5.23275e-16	-0.0359188	7834.29	149	0.160547	0.80688	0	1	7549.2	149	0.102039	HDAC7A	12	HDAC7; DKFZP586J0917;	NM_015401.1	GeneID:51564		46478953
23347	cg23370883	0.637378	-152.813	152.813	5.23275e-16	-0.0453608	6657.76	149	0.200392	0.682739	0	1	6539.98	149	0.12532	MYL7	7	MYL2A; MYLC2A;	NM_021223.2	GeneID:58498		44147129
17948	cg17919471	0.728538	-152.767	152.767	5.2881e-16	-0.0394276	6722.42	149	0.200424	0.767965	0	1	6976.97	149	0.129777	XAGE3	X	PLAC6; GAGED4; XAGE-3; pp9012; MGC71925;	NM_130776.1	GeneID:170626	X:52913338-52913733	52913717
19551	cg19560210	0.74525	-152.758	152.758	5.29956e-16	-0.0380981	3205.55	149	0.164431	0.783348	0	1	3166.11	149	0.111741	PGBD5	1	FLJ11413; DKFZp761A0620;	NM_024554.2	GeneID:79605		228579960
1621	cg01602596	0.757595	-152.654	152.654	5.427e-16	-0.0370578	17672.1	149	0.182487	0.794653	0	1	17913.8	149	0.116974	KRT14	17	K14; CK14; EBS3; EBS4;	NM_000526.3	GeneID:3861		36997052
5774	cg05779068	0.686928	-152.505	152.505	5.61655e-16	-0.042375	3588.99	149	0.191883	0.729302	0	1	3536.57	149	0.122378	OR2W1	6	hs6M1-15; MGC119162; MGC119163; MGC119165;	NM_030903.2	GeneID:26692		29122025
6183	cg06220755	0.786701	-152.12	152.12	6.13819e-16	-0.0344205	7007.4	149	0.151123	0.821122	0	1	6915.85	149	0.0889384	RAI2	X		NM_021785.2	GeneID:10742		17730979
4195	cg04144768	0.693986	-152.028	152.028	6.26931e-16	-0.0418402	5363.14	149	0.177009	0.735826	0	1	5250.38	149	0.109673	DDC	7	AADC;	NM_000790.2	GeneID:1644		50595648
19662	cg19685066	0.80594	-151.914	151.914	6.43621e-16	-0.0325754	13080.2	149	0.148742	0.838515	0	1	13038.5	149	0.0926006	ACTL8	1		NM_030812.1	GeneID:81569		17954590
25751	cg25771201	0.834537	-151.89	151.89	6.47113e-16	-0.0296874	19466.1	149	0.123753	0.864224	0	1	19649.8	149	0.0750945	SCDR10	19		NM_198533.1	GeneID:374875		5630653
15403	cg15408454	0.875477	-151.833	151.833	6.55768e-16	-0.0251896	13950	149	0.108331	0.900666	0	1	13662.2	149	0.0664703	MAGEA6	X	MAGE6; MAGE3B; MAGE-3b; MGC52297;	NM_005363.2	GeneID:4105	X:151617742-151618072	151617883
18178	cg18172186	0.801169	-151.778	151.778	6.6411e-16	-0.0330211	6936.6	149	0.132133	0.834191	0	1	6879.24	149	0.0807892	KIAA1913	6	TTMC;	NM_052913.2	GeneID:114801		130800007
23216	cg23240895	0.756257	-151.738	151.738	6.70162e-16	-0.0370641	11310	149	0.160598	0.793321	0	1	11347.7	149	0.102595	PRR5	22	PP610; FLJ20185;	NM_015366.3	GeneID:55615		43450548
20075	cg20092728	0.710085	-151.712	151.712	6.74233e-16	-0.0406703	5583.68	149	0.200782	0.750755	0	1	5646.96	149	0.127492	SLC5A12	11	MGC52019;	NM_178498.2	GeneID:159963		26701043
14916	cg14912034	0.666735	-151.345	151.345	7.33618e-16	-0.0434935	4206.4	149	0.200032	0.710229	0	1	4179.61	149	0.128398	LYZL2	10		NM_183058.2	GeneID:119180		30958857
24509	cg24541550	0.813498	-151.25	151.25	7.49842e-16	-0.0317662	17382.3	149	0.146091	0.845264	0	1	17301.6	149	0.0886215	MRVI1	11	IRAG; JAW1L;	NM_130385.1	GeneID:10335		10671936
19756	cg19777783	0.664061	-151.138	151.138	7.69396e-16	-0.0436248	8091.94	149	0.180647	0.707686	0	1	8052.77	149	0.11694	SLC15A4	12	PHT1; PTR4; FP12591;	NM_145648.1	GeneID:121260	12:127872973-127875352	127875329
26732	cg26770882	0.709004	-151.102	151.102	7.75908e-16	-0.0406699	7187.73	149	0.15479	0.749674	0	1	7191.72	149	0.0970928	AIPL1	17	LCA4; AIPL2;	NM_014336.3	GeneID:23746		6278905
18808	cg18806980	0.709607	-151.025	151.025	7.89714e-16	-0.0406166	3407.74	149	0.187736	0.750223	0	1	3425.14	149	0.118982	KIAA0703	16	SPCA2; ATP2C2; DKFZp686H22230;	NM_014861.1	GeneID:9914		82995624
7535	cg07566050	0.776662	-150.977	150.977	7.98473e-16	-0.0352054	8076.24	149	0.164773	0.811867	0	1	8053.61	149	0.101104	PEA15	1	PED; MAT1; HMAT1; MAT1H; PEA-15; HUMMAT1H;	NM_003768.2	GeneID:8682		158441379
14148	cg14173523	0.751133	-150.643	150.643	8.62383e-16	-0.0373636	13130.2	149	0.170742	0.788496	0	1	13044.9	149	0.106151	FUT5	19	FUC-TV;	NM_002034.2	GeneID:2527		5822035
7907	cg07944811	0.860896	-150.636	150.636	8.63714e-16	-0.0267373	11221.5	149	0.122927	0.887633	0	1	11063.1	149	0.0768269	GCK	7	GK; GLK; HK4; HKIV; HXKP; MODY2;	NM_000162.2	GeneID:2645		44195355
12295	cg12376406	0.663009	-150.636	150.636	8.63714e-16	-0.0436159	7330.36	149	0.213234	0.706625	0	1	7269.84	149	0.133673	FAM12B	14	EP3B; HE3B; HE3-BETA;	NM_022360.3	GeneID:64184		20306146
25715	cg25737664	0.848649	-150.611	150.611	8.687e-16	-0.0280725	9903.07	149	0.120278	0.876721	0	1	9896.81	149	0.075649	SIRPD	20	PTPNS1L2; dJ576H24.4;	NM_178460.1	GeneID:128646		1486671
4521	cg04484789	0.772699	-150.565	150.565	8.78072e-16	-0.0355102	5435.45	149	0.15569	0.808209	0	1	5454.43	149	0.0912269	KRT25B	17		NM_181539.3	GeneID:353288		36181850
15670	cg15648315	0.850468	-150.539	150.539	8.83344e-16	-0.0278688	11259.5	149	0.114575	0.878337	0	1	11324	149	0.0733223	FLJ26443	13		NM_207440.1	GeneID:400165	13:112349562-112349890	112349637
24727	cg24765446	0.726967	-150.539	150.539	8.83344e-16	-0.0392675	4550.89	149	0.173914	0.766234	0	1	4476.57	149	0.111544	WFDC6	20	WAP6; C20orf171; MGC126649; MGC126653; dJ461P17.11;	NM_080827.1	GeneID:140870		43601388
2028	cg01999333	0.685619	-150.196	150.196	9.55895e-16	-0.042148	5680.85	149	0.191964	0.727767	0	1	5715.55	149	0.120367	CASP14	19	MGC119078; MGC119079;	NM_012114.1	GeneID:23581		15023623
16729	cg16678925	0.677754	-150.174	150.174	9.60793e-16	-0.0426488	6251.14	149	0.205085	0.720403	0	1	6127.75	149	0.124694	OR1A2	17	OR17-6;	NM_012352.1	GeneID:26189		3047722
21128	cg21165909	0.743892	-149.863	149.863	1.03195e-15	-0.0378593	6097.48	149	0.180612	0.781752	0	1	6091.57	149	0.11184	CPS1	2		NM_001875.2	GeneID:1373		211128183
13382	cg13446622	0.782872	-149.804	149.804	1.04629e-15	-0.0345162	10154.5	149	0.168593	0.817388	0	1	9927.78	149	0.110824	SDR-O	12	RDHS; SDRO; FLJ16333; MGC126600; MGC126602;	NM_148897.1	GeneID:121214		55614673
8107	cg08141989	0.815001	-149.762	149.762	1.05633e-15	-0.0314674	25018.5	149	0.148917	0.846468	0	1	25088.2	149	0.0947552	ASGR1	17	ASGPR; CLEC4H1; Hs.12056;	NM_001671.2	GeneID:432		7023286
22923	cg22960952	0.645777	-149.66	149.66	1.08156e-15	-0.0444541	7849.98	149	0.187047	0.690231	0	1	7958.19	149	0.119555	FLJ23657	4		NM_178497.2	GeneID:152816		76700193
2762	cg02756698	0.756423	-149.656	149.656	1.08246e-15	-0.0368038	5228.58	149	0.1554	0.793227	0	1	5061.58	149	0.10069	KRT12	17	K12;	NM_000223.2	GeneID:3859		36276534
2786	cg02784874	0.672441	-149.656	149.656	1.08246e-15	-0.0429073	22683.5	149	0.199468	0.715348	0	1	22959.1	149	0.122487	KRT9	17	K9; EPPK;	NM_000226.2	GeneID:3857		36982488
4134	cg04086012	0.685716	-149.56	149.56	1.10652e-15	-0.0420532	12412.4	149	0.195242	0.727769	0	1	12544.9	149	0.121132	FLJ36180	4		NM_178556.3	GeneID:339976	4:189297883-189298217	189297894
19228	cg19233472	0.797094	-149.56	149.56	1.10652e-15	-0.0331741	5448.48	149	0.140739	0.830268	0	1	5502.12	149	0.0922565	FOXI1	5	HFH3; FKHL10; FREAC6; MGC34197;	NM_012188.3	GeneID:2299	5:169465139-169465394	169465330
6207	cg06241300	0.767905	-149.493	149.493	1.12393e-15	-0.0358055	4366.09	149	0.168016	0.80371	0	1	4397.33	149	0.105498	APOM	6	G3a; NG20; HSPC336; MGC22400;	NM_019101.2	GeneID:55937		31731248
20018	cg20034100	0.70294	-149.46	149.46	1.1325e-15	-0.0408791	3179.14	149	0.198524	0.743819	0	1	3236.88	149	0.130478	IBRDC1	6	C6orf172; MGC26996; dJ84N20.1;	NM_152553.2	GeneID:154214		125346195
4380	cg04349727	0.658554	-149.316	149.316	1.17047e-15	-0.0436862	6047.74	149	0.187991	0.702241	0	1	6166.3	149	0.125844	KLK5	19	SCTE; KLKL2; KLK-L2;	NM_012427.3	GeneID:25818	19:56148870-56149668	56149201
14392	cg14401454	0.830401	-149.315	149.315	1.17098e-15	-0.0298699	5164.74	149	0.127008	0.860271	0	1	5222.36	149	0.0820777	C14orf8	14		NM_173846.3	GeneID:122664		20567325
19298	cg19305227	0.752833	-149.216	149.216	1.19776e-15	-0.0370483	7173.66	149	0.159337	0.789881	0	1	7137.29	149	0.101987	SLC28A2	15	CNT2; HCNT2; SPNT1; HsT17153;	NM_004212.1	GeneID:9153	15:43331294-43331673	43331627
11642	cg11706163	0.676069	-148.932	148.932	1.2787e-15	-0.0425813	7311.57	149	0.189945	0.71865	0	1	7359.92	149	0.117906	C9	5		NM_001737.2	GeneID:735		39400252
15555	cg15554401	0.858464	-148.915	148.915	1.28372e-15	-0.0268568	22649.8	149	0.141336	0.885321	0	1	22951.5	149	0.0878637	GJB4	1	CX30.3; MGC21116;	NM_153212.1	GeneID:127534	1:34999454-35000017	34999478
25654	cg25668626	0.738381	-148.813	148.813	1.31432e-15	-0.0381664	3321.66	149	0.17616	0.776548	0	1	3369.38	149	0.117009	OAS1	12	OIAS; IFI-4; OIASI;	NM_002534.2	GeneID:4938		111827986
13954	cg13993218	0.670759	-148.747	148.747	1.33432e-15	-0.0428818	15961.2	149	0.205249	0.713641	0	1	16123.1	149	0.130201	INS	11		NM_000207.1	GeneID:3630		2138442
5363	cg05358291	0.687023	-148.692	148.692	1.35136e-15	-0.0418485	4167.13	149	0.206482	0.728871	0	1	4039.59	149	0.133585	CYP4F2	19	CPF2;	NM_001082.3	GeneID:8529		15870219
6293	cg06323290	0.844635	-148.646	148.646	1.3659e-15	-0.0283228	10759.6	149	0.114187	0.872958	0	1	10954	149	0.0734623	HK1	10	HKI; HXK1; HK1-ta; HK1-tb;	NM_033496.1	GeneID:3098		70699885
11082	cg11161417	0.690309	-148.49	148.49	1.4157e-15	-0.0416054	10144.7	149	0.206451	0.731915	0	1	10219.2	149	0.131871	SPACA3	17	LYC3; LYZL3; SLLP1; ALLP17; MGC119058; 1700025M08Rik;	NM_173847.2	GeneID:124912		28343567
23696	cg23737768	0.70276	-148.446	148.446	1.43031e-15	-0.0407564	3237.67	149	0.183328	0.743516	0	1	3161	149	0.117271	KRT24	17	FLJ20261;	NM_019016.1	GeneID:192666		36113623
2093	cg02064402	0.74578	-148.27	148.27	1.48919e-15	-0.0375099	14401.4	149	0.160544	0.78329	0	1	14307.2	149	0.10455	SLC6A18	5	Xtrp2; FLJ31236;	NM_182632.1	GeneID:348932		1278719
27080	cg27132814	0.71431	-148.147	148.147	1.53215e-15	-0.0398999	7486.01	149	0.190698	0.75421	0	1	7616.41	149	0.122024	C20orf79	20	HSD22; dJ1068E13.2;	NM_178483.2	GeneID:140856		18742303
3271	cg03251857	0.825569	-148.056	148.056	1.56448e-15	-0.0302407	11553.8	149	0.136416	0.855809	0	1	11415.5	149	0.085875	PPAPDC3	9	C9orf67; FLJ14662; KIAA0515; MGC12921; RP11-643E14.1;	NM_032728.2	GeneID:84814	9:133154263-133154511	133154401
12699	cg12754854	0.717724	-148.053	148.053	1.56581e-15	-0.039638	3541.02	149	0.193085	0.757362	0	1	3480.78	149	0.123225	PHYHD1	9	MGC16638;	NM_174933.2	GeneID:254295		130722680
18787	cg18787449	0.742003	-148.053	148.053	1.56581e-15	-0.0377849	5704.58	149	0.168423	0.779788	0	1	5699.17	149	0.105631	MAGEA2B	X	MAGE2; MAGEA2; MGC16973;	NM_153488.3	GeneID:266740		151670926
5022	cg04979933	0.735381	-147.826	147.826	1.64953e-15	-0.0382778	3573.66	149	0.191018	0.773658	0	1	3494.62	149	0.126421	INSL5	1	PRO182; UNQ156; MGC126695; MGC126697;	NM_005478.3	GeneID:10022		67039389
11127	cg11201288	0.700964	-147.81	147.81	1.65558e-15	-0.0407952	3358.52	149	0.188388	0.741759	0	1	3239.18	149	0.124919	SFRS11	1	p54; dJ677H15.2; DKFZp686M13204;	NM_004768.2	GeneID:9295		70442473
2814	cg02810134	0.873248	-147.802	147.802	1.65875e-15	-0.025119	18000.8	149	0.106445	0.898367	0	1	18129.7	149	0.0712881	TNNC2	20		NM_003279.2	GeneID:7125		43889329
2617	cg02614818	0.822969	-147.744	147.744	1.68132e-15	-0.03047	8614.77	149	0.131906	0.85344	0	1	8478.08	149	0.0843029	ABCC6	16	ARA; PXE; MLP1; MRP6; ABC34; MOATE; EST349056;	NM_001171.2	GeneID:368	16:16224595-16225675	16225669
21981	cg22013966	0.85456	-147.546	147.546	1.75975e-15	-0.027162	19425.8	149	0.123197	0.881721	0	1	19623.7	149	0.0763396	SERPINA13	14	UNQ6121;	NM_207378.1	GeneID:388007		94175923
12086	cg12128839	0.553809	-147.14	147.14	1.93183e-15	-0.0478856	8269.94	149	0.195944	0.601695	0	1	8257.59	149	0.141099	HOXA5	7	HOX1; HOX1C; HOX1.3; MGC9376;	NM_019102.2	GeneID:3202	7:27147983-27152159	27149961
15475	cg15475323	0.818752	-147.044	147.044	1.9751e-15	-0.0308223	7866.99	149	0.148612	0.849575	0	1	7980.56	149	0.0911628	FLJ36070	19	MGC117259;	NM_182574.1	GeneID:284358		53911914
12100	cg12150401	0.675188	-146.883	146.883	2.0497e-15	-0.0423504	4539.58	149	0.187985	0.717538	0	1	4575.24	149	0.117476	TAS2R16	7	T2R16;	NM_016945.2	GeneID:50833		122422758
18118	cg18109798	0.673611	-146.817	146.817	2.08089e-15	-0.0424378	7082.87	149	0.200775	0.716049	0	1	7086.23	149	0.123685	SLCO1C1	12	OATP1; OATP-F; OATP1C1; SLC21A14;	NM_017435.2	GeneID:53919		20739740
5985	cg05997860	0.682202	-146.758	146.758	2.10945e-15	-0.0418937	8569.15	149	0.200402	0.724096	0	1	8673.4	149	0.131014	ADAM21	14	ADAM31; MGC125389;	NM_003813.2	GeneID:8747		69993648
424	cg00412805	0.890554	-146.743	146.743	2.1169e-15	-0.0230512	10965.1	149	0.0877844	0.913605	0	1	11211.5	149	0.0523057	KBTBD5	3	SRYP; FLJ32015; MGC125350;	NM_152393.2	GeneID:131377		42701974
15771	cg15742700	0.616049	-146.613	146.613	2.18097e-15	-0.0454861	3845.2	149	0.191242	0.661535	0	1	3777.54	149	0.126268	BLK	8	MGC10442;	NM_001715.2	GeneID:640		11388262
19415	cg19421752	0.63134	-146.604	146.604	2.1858e-15	-0.0447534	8732.53	149	0.203328	0.676094	0	1	8318.03	149	0.130527	SLC6A18	5	Xtrp2; FLJ31236;	NM_182632.1	GeneID:348932	5:1278028-1278231	1278224
20267	cg20305726	0.699141	-146.509	146.509	2.23429e-15	-0.0407457	7717.96	149	0.201053	0.739887	0	1	7966.41	149	0.125832	DEFB126	20	DEFB26; hBD-26; C20orf8; DEFB-26; ESP13.2; bA530N10.1;	NM_030931.2	GeneID:81623		71613
27103	cg27160701	0.752335	-146.46	146.46	2.25918e-15	-0.0367578	4008.09	149	0.186375	0.789093	0	1	4053.8	149	0.125352	SBEM	12		NM_058173.1	GeneID:118430		53534691
4173	cg04123507	0.870605	-146.191	146.191	2.40364e-15	-0.0252857	10306.6	149	0.115928	0.895891	0	1	9979.16	149	0.0791104	KRTHB6	12	HB6; Hb1; MNX; hHb6; KRTHB1;	NM_002284.2	GeneID:3892	12:50981438-50982407	50981537
15662	cg15642035	0.715384	-145.959	145.959	2.53548e-15	-0.039538	3276.6	149	0.19605	0.754922	0	1	3291.43	149	0.124158	C8ORFK32	8	MGC33221; MGC126009; MGC126010;	NM_015912.2	GeneID:51059		139234234
12625	cg12687463	0.668954	-145.859	145.859	2.59454e-15	-0.0425848	7141.76	149	0.188697	0.711539	0	1	7050.85	149	0.117162	CFHR1	1	CFHL; FHR1; HFL1; CFHL1; H36-1; MGC104329;	NM_002113.1	GeneID:3078		195054473
20534	cg20587968	0.780938	-145.635	145.635	2.73237e-15	-0.0342236	23030	149	0.162332	0.815161	0	1	23112.7	149	0.100566	UCN3	10	SCP; SPC; UCNIII; FLJ21665; MGC119002;	NM_053049.2	GeneID:114131	10:5396354-5396598	5396423
22607	cg22637941	0.864519	-145.552	145.552	2.78516e-15	-0.0259072	7062.26	149	0.105225	0.890426	0	1	7148.88	149	0.0671267	WISP1	8	CCN4; WISP1i;	NM_003882.2	GeneID:8840	8:134272943-134273143	134273023
10273	cg10345936	0.664501	-145.491	145.491	2.82397e-15	-0.0427963	5893.24	149	0.200215	0.707297	0	1	5901.99	149	0.12432	SLC36A2	5	PAT2; TRAMD1; FLJ16051; MGC119658; MGC119660;	NM_181776.1	GeneID:153201		150708005
19623	cg19635695	0.660267	-145.407	145.407	2.87959e-15	-0.0430292	3762.18	149	0.195782	0.703296	0	1	3622.33	149	0.127023	PDE6C	10	PDEA2;	NM_006204.2	GeneID:5146		95362435
11317	cg11384427	0.567522	-145.133	145.133	3.06704e-15	-0.0471491	8090.98	149	0.177018	0.614671	0	1	8081.55	149	0.121488	TNFRSF7	12	T14; CD27; S152; Tp55; MGC20393;	NM_001242.3	GeneID:939		6423846
27354	cg27418851	0.701406	-145.087	145.087	3.09956e-15	-0.040403	11037.3	149	0.166651	0.741809	0	1	10723.3	149	0.100975	MBL2	10	MBL; MBP; MBP1; COLEC1; HSMBPC; MGC116832; MGC116833;	NM_000242.1	GeneID:4153		54201659
25074	cg25093045	0.686168	-145.003	145.003	3.16031e-15	-0.0413993	11996.1	149	0.193577	0.727567	0	1	11927.9	149	0.123109	FLJ46481	4		NM_207405.1	GeneID:389197	4:6041328-6041558	6041539
4005	cg03959079	0.7016	-144.835	144.835	3.28458e-15	-0.0403562	7301.61	149	0.19561	0.741956	0	1	7246.34	149	0.12658	TAB3	X	NAP1; MGC45404;	NM_152787.2	GeneID:257397		30904187
2817	cg02812142	0.686737	-144.768	144.768	3.33572e-15	-0.0413306	5677.5	149	0.182239	0.728067	0	1	5766.65	149	0.118221	ACMSD	2		NM_138326.1	GeneID:130013		135311793
22458	cg22478614	0.656103	-144.667	144.667	3.41405e-15	-0.0431596	23885.9	149	0.203705	0.699263	0	1	24218.9	149	0.132503	DEFB4	8	SAP1; DEFB2; HBD-2; DEFB-2; DEFB102;	NM_004942.2	GeneID:1673		7789670
20621	cg20664247	0.648903	-144.638	144.638	3.4374e-15	-0.0435519	26978.7	149	0.197763	0.692455	0	1	27611	149	0.12862	PEX10	1	NALD; RNF69; MGC1998;	NM_002617.3	GeneID:5192	1:2335193-2335428	2335335
8636	cg08693325	0.67155	-144.635	144.635	3.43977e-15	-0.0422556	4398.92	149	0.169456	0.713806	0	1	4440.05	149	0.116377	LUZP4	X	CT-8; CT28; HOM-TES-85;	NM_016383.2	GeneID:51213	X:114429798-114430105	114430074
6785	cg06799664	0.716678	-144.462	144.462	3.57915e-15	-0.0392494	25910	149	0.17856	0.755927	0	1	25988	149	0.121155	DNAHL1	17	FLJ40457;	NM_173628.1	GeneID:284176	17:74078474-74078828	74078716
23984	cg24030609	0.698958	-144.215	144.215	3.7887e-15	-0.0404515	3539.6	149	0.189618	0.73941	0	1	3320.31	149	0.121995	ELA2B	1	MGC97052;	NM_015849.2	GeneID:51032		15675198
9504	cg09555879	0.841019	-143.854	143.854	4.1168e-15	-0.0282636	15222.3	149	0.121228	0.869283	0	1	14969.9	149	0.0771693	GRIK5	19	KA2; EAA2; GRIK2;	NM_002088.3	GeneID:2901		47261796
1038	cg01015871	0.625896	-143.579	143.579	4.38611e-15	-0.0445718	8462.86	149	0.176561	0.670467	0	1	8012.22	149	0.114388	MT4	16	MTIV;	NM_032935.1	GeneID:84560		55156689
3423	cg03399459	0.753593	-143.489	143.489	4.47827e-15	-0.0363011	10638.7	149	0.173524	0.789894	0	1	10360.5	149	0.111548	ANXA8	10	ANX8; ANXA8L2; FLJ32754; VAC beta;	NM_001630.1	GeneID:244		47217088
7505	cg07531356	0.851621	-143.232	143.232	4.75062e-15	-0.0270988	11914	149	0.136637	0.87872	0	1	12220.8	149	0.0887649	INSL6	9	RIF1;	NM_007179.2	GeneID:11172	9:5175191-5175954	5175951
9663	cg09736922	0.698302	-143.229	143.229	4.75488e-15	-0.0403646	16764.9	149	0.166809	0.738666	0	1	17157.4	149	0.114714	THPO	3	ML; TPO; MGDF; MKCSF; MPLLG;	NM_000460.2	GeneID:7066		185578670
3981	cg03941108	0.696934	-143.142	143.142	4.85043e-15	-0.040444	11371.6	149	0.197716	0.737378	0	1	11133.7	149	0.121759	C1QB	1		NM_000491.2	GeneID:713		22858524
1743	cg01720520	0.624463	-143.14	143.14	4.85266e-15	-0.0445729	5859.35	149	0.190436	0.669036	0	1	5933.32	149	0.120263	LILRB1	19	CD85; ILT2; LIR1; MIR7; CD85J; LIR-1; MIR-7;	NM_006669.2	GeneID:10859		59819704
10049	cg10134939	0.784	-143.117	143.117	4.87922e-15	-0.0336702	19679.4	149	0.152415	0.81767	0	1	19583.2	149	0.0929283	FLJ13391	2		NM_032181.1	GeneID:84141		75650363
25059	cg25081201	0.917189	-143.095	143.095	4.90388e-15	-0.0196221	27472	149	0.0906987	0.936812	0	1	27675.4	149	0.0566987	FXYD4	10	CHIF;	NM_173160.2	GeneID:53828		43187077
15181	cg15186584	0.822159	-143.082	143.082	4.9187e-15	-0.0300916	6952.09	149	0.145182	0.85225	0	1	7042.14	149	0.0921226	C9orf24	9	CBE1; MGC32921; MGC33614; NYD-SP22; bA573M23.4;	NM_147168.1	GeneID:84688		34387651
13927	cg13968061	0.745912	-142.923	142.923	5.10211e-15	-0.0368461	4992.97	149	0.143243	0.782758	0	1	4901.77	149	0.0883757	APCS	1	SAP; PTX2; MGC88159;	NM_001639.2	GeneID:325		157823881
9104	cg09163021	0.766487	-142.905	142.905	5.12248e-15	-0.0351617	28440.6	149	0.151945	0.801649	0	1	28384.6	149	0.101662	RAPSN	11	CMS1D; CMS1E; RNF205; MGC3597;	NM_032645.3	GeneID:5913		47427344
14632	cg14633704	0.861521	-142.867	142.867	5.16749e-15	-0.0260053	11121.9	149	0.11213	0.887527	0	1	11155.3	149	0.0756031	HSD17B3	9	EDH17B3;	NM_000197.1	GeneID:3293		98105171
18696	cg18692273	0.875512	-142.796	142.796	5.25327e-15	-0.0244626	11325.4	149	0.11907	0.899974	0	1	11384.7	149	0.0778967	TNNT2	1	CMH2; TnTC; cTnT; CMD1D; MGC3889;	NM_000364.2	GeneID:7139		199614106
19835	cg19850370	0.676836	-142.714	142.714	5.35291e-15	-0.0416643	5071.72	149	0.188089	0.718501	0	1	4988.19	149	0.116156	SLC4A4	4	KNBC; NBC1; NBC2; pNBC; HNBC1; hhNMC; SLC4A5; DKFZp781H1314;	NM_003759.1	GeneID:8671		72423968
12438	cg12514506	0.800071	-142.674	142.674	5.40256e-15	-0.0321599	9699.54	149	0.152852	0.832231	0	1	9741.47	149	0.0945535	OSBPL5	11	ORP5; OBPH1;	NT_009237.17	GeneID:114879	11:3077516-3078062	3077862
20950	cg20993403	0.671108	-142.674	142.674	5.40256e-15	-0.0420035	10594	149	0.182269	0.713112	0	1	10460.9	149	0.113067	EPB41L1	20	4.1N; KIAA0338; MGC11072;	NM_012156.2	GeneID:2036		34163743
22242	cg22268164	0.698364	-142.495	142.495	5.6295e-15	-0.0402567	5203.41	149	0.21341	0.738621	0	1	5109.91	149	0.132636	TRHR	8		NM_003301.1	GeneID:7201		110168926
22265	cg22290566	0.848605	-142.318	142.318	5.86449e-15	-0.027331	24242.6	149	0.135152	0.875936	0	1	24020.7	149	0.0876092	LMAN1L	15	ERGL; ERGIC-53L;	NM_021819.2	GeneID:79748		72892339
3242	cg03221619	0.654002	-142.174	142.174	6.06136e-15	-0.0429135	11601.9	149	0.207967	0.696915	0	1	11428.7	149	0.124832	FCER2	19	CD23; FCE2; CD23A; IGEBF; CLEC4J;	NM_002002.3	GeneID:2208		7673348
14242	cg14269477	0.721883	-141.969	141.969	6.35521e-15	-0.0385482	27133.5	149	0.188692	0.760431	0	1	27274.2	149	0.116502	TRPV5	7	CAT2; ECAC1;	NM_019841.3	GeneID:56302		142340719
13652	cg13705284	0.680693	-141.854	141.854	6.52574e-15	-0.0413064	4659.52	149	0.190582	0.721999	0	1	4787.79	149	0.119287	ACOX2	3	BCOX; BRCOX; THCCox; BRCACOX;	NM_003500.2	GeneID:8309		58498353
16660	cg16601385	0.679929	-141.771	141.771	6.65166e-15	-0.0413419	9934.9	149	0.158615	0.721271	0	1	9842.92	149	0.10492	CFD	19	DF; ADN; PFD;	NM_001928.2	GeneID:1675		809846
351	cg00333528	0.31496	141.604	141.604	6.91146e-15	0.0438763	8598.46	149	0.195768	0.271084	0	1	8545.2	149	0.131893	GABRR1	6		NM_002042.2	GeneID:2569		89984204
3568	cg03548857	0.219385	141.604	141.604	6.91146e-15	0.0375159	4783.53	149	0.147148	0.181869	0	1	4793.6	149	0.0982449	FFAR2	19	FFA2R; GPR43;	NM_005306.1	GeneID:2867		40632014
4244	cg04216597	0.074129	141.604	141.604	6.91146e-15	0.0238839	22295.2	149	0.100739	0.0502451	0	1	22250.5	149	0.0581941	CACNA1G	17	NBR13; Ca(V)T.1; MGC117234;	NT_010783.14	GeneID:8913	17:45992788-45994919	45994835
5109	cg05065037	0.092256	141.604	141.604	6.91146e-15	0.0257294	8686.08	149	0.106155	0.0665266	0	1	8796.26	149	0.064995	ZCCHC6	9	PAPD6; DKFZp686F119; DKFZp686I1269; DKFZp686C11112;	NM_024617.2	GeneID:79670	9:88158717-88159846	88159748
5493	cg05483509	0.0977966	141.604	141.604	6.91146e-15	0.0264384	10124.4	149	0.104878	0.0713582	0	1	10240.6	149	0.0603533	ATP6V0C	16	ATPL; VATL; Vma3; ATP6C; ATP6L;	NM_001694.2	GeneID:527	16:2503363-2505029	2503436
11936	cg11981599	0.155724	141.604	141.604	6.91146e-15	0.0321684	21638.1	149	0.140443	0.123556	0	1	21470.8	149	0.0862315	GATA4	8	MGC126629;	NT_077531.3	GeneID:2626	8:11602473-11604934	11603935
16090	cg16003913	0.402841	141.604	141.604	6.91146e-15	0.0467593	18544	149	0.183956	0.356082	0	1	18647.9	149	0.120816	MPG	16	AAG; MDG; APNG; Mid1; anpg; PIG11; PIG16; CRA36.1;	NM_001015052.1	GeneID:4350		67072
17328	cg17296166	0.104161	141.604	141.604	6.91146e-15	0.0267975	12142.3	149	0.120932	0.0773633	0	1	12005.8	149	0.0721731	FLJ10781	19		NM_018215.2	GeneID:55228	19:51666325-51667046	51666407
18992	cg18997129	0.134332	141.604	141.604	6.91146e-15	0.0299392	13121.1	149	0.129612	0.104393	0	1	13064.2	149	0.0829002	EPHA1	7	EPH; EPHT; EPHT1;	NM_005232.3	GeneID:2041	7:142815700-142816331	142815972
26300	cg26312150	0.10427	141.604	141.604	6.91146e-15	0.0271118	23262.3	149	0.109078	0.0771581	0	1	23480.6	149	0.0693871	TWIST1	7	SCS; ACS3; BPES2; BPES3; TWIST;	NM_000474.3	GeneID:7291	7:19122442-19124663	19123075
2443	cg02423618	0.62976	-141.458	141.458	7.14743e-15	-0.0440565	25982.1	149	0.186698	0.673817	0	1	26307.5	149	0.116895	SPATA8	15	MGC44294;	NM_173499.2	GeneID:145946		95126729
711	cg00684178	0.750936	-141.406	141.406	7.23452e-15	-0.0362541	9888.69	149	0.218359	0.78719	0	1	10932.9	149	0.18083	NEU4	2	MGC18222; MGC102757;	NM_080741.1	GeneID:129807		242400753
24335	cg24387380	0.588159	-141.364	141.364	7.30466e-15	-0.0458257	5669.29	149	0.176301	0.633985	0	1	5724.84	149	0.115593	GABRA5	15		NM_000810.2	GeneID:2558		24741904
5106	cg05064181	0.803717	-141.107	141.107	7.75033e-15	-0.0316502	5629.71	149	0.134326	0.835367	0	1	5638.9	149	0.0864367	ABLIM1	10	ABLIM; LIMAB1; LIMATIN; MGC1224; FLJ14564; KIAA0059; DKFZp781D0148;	NM_002313.5	GeneID:3983		116435388
719	cg00689014	0.679955	-140.62	140.62	8.66942e-15	-0.0411753	16731	149	0.191626	0.72113	0	1	16698.6	149	0.118297	GAST	17	GAS;	NM_000805.3	GeneID:2520		37122664
6327	cg06353345	0.646441	-140.523	140.523	8.86564e-15	-0.0430751	2979.04	149	0.187315	0.689516	0	1	2854.43	149	0.119712	OR51B4	11	HOR5 Beta1;	NM_033179.1	GeneID:79339		5279552
9443	cg09508556	0.858472	-140.472	140.472	8.97016e-15	-0.0261223	16883.7	149	0.110276	0.884594	0	1	16915.2	149	0.0670378	PSORS1C2	6	SPR1; C6orf17;	NM_014069.1	GeneID:170680		31214961
10535	cg10620457	0.677052	-140.414	140.414	9.09055e-15	-0.0413228	2756.97	149	0.177152	0.718375	0	1	2834.31	149	0.114735	C8B	1		NM_000066.2	GeneID:732		57204698
6065	cg06100324	0.882321	-140.28	140.28	9.37584e-15	-0.023498	25029.4	149	0.109249	0.905819	0	1	25017.8	149	0.0700872	MSLN	16	MPF; SMR; CAK1;	NM_005823.4	GeneID:10232		751348
18769	cg18766847	0.715223	-140.259	140.259	9.42063e-15	-0.0387962	3346.56	149	0.176025	0.75402	0	1	3441.53	149	0.116378	ACMSD	2		NM_138326.1	GeneID:130013		135312097
23760	cg23812886	0.752732	-140.236	140.236	9.47044e-15	-0.0359681	5438.94	149	0.167994	0.7887	0	1	5389.19	149	0.10777	SSX5	X	MGC9494;	NM_021015.3	GeneID:6758	X:47941128-47941340	47941234
23384	cg23414387	0.695958	-140.195	140.195	9.56137e-15	-0.0400974	4957.7	149	0.179992	0.736056	0	1	4943.77	149	0.113036	CYP4B1	1	P-450HP;	NM_000779.2	GeneID:1580		47037453
12777	cg12830694	0.857763	-140.098	140.098	9.7762e-15	-0.0261637	12407.7	149	0.108817	0.883927	0	1	12258.4	149	0.0680206	PPP1R14A	19	CPI-17; PPP1INL;	NM_033256.1	GeneID:94274		43439636
3163	cg03140978	0.838307	-139.982	139.982	1.00422e-14	-0.0281719	9796.59	149	0.13624	0.866479	0	1	9699.08	149	0.0846756	C1orf201	1	FLJ33340;	NM_178122.2	GeneID:90529		24600714
5535	cg05517711	0.686356	-139.9	139.9	1.02336e-14	-0.0406734	17235	149	0.204285	0.727029	0	1	17552	149	0.127929	ST6GALNAC6	9	SIAT7F; ST6GALNACVI; RP11-203J24.3;	NM_013443.3	GeneID:30815	9:129702258-129702529	129702272
7618	cg07654843	0.83012	-139.724	139.724	1.06566e-14	-0.0289683	5401.57	149	0.128113	0.859089	0	1	5590.45	149	0.0809469	MYO18B	22	DKFZp434C2422; DKFZp779C1668;	NM_032608.5	GeneID:84700	22:24468015-24468522	24468429
25974	cg25995212	0.774399	-139.663	139.663	1.08059e-14	-0.0341067	5142.48	149	0.181822	0.808505	0	1	5226.31	149	0.112591	SCN7A	2	SCN6A;	NM_002976.1	GeneID:6332		167051230
26595	cg26628847	0.661469	-139.656	139.656	1.08231e-14	-0.0421246	12893.7	149	0.20804	0.703593	0	1	13230	149	0.130312	PIP	7	GP17; GCDFP-15;	NM_002652.2	GeneID:5304		142539426
479	cg00466436	0.664569	-139.483	139.483	1.12637e-14	-0.0419236	6662.42	149	0.171776	0.706493	0	1	6814.47	149	0.108756	DEFB126	20	DEFB26; hBD-26; C20orf8; DEFB-26; ESP13.2; bA530N10.1;	NM_030931.2	GeneID:81623		71163
26373	cg26390526	0.765457	-139.436	139.436	1.13854e-14	-0.0348325	4168.46	149	0.170649	0.800289	0	1	4173.03	149	0.113373	FLG	1		NM_002016.1	GeneID:2312		150565702
7516	cg07545232	0.86378	-139.303	139.303	1.17409e-14	-0.0254517	13468.3	149	0.115858	0.889232	0	1	12933.4	149	0.075139	MAGEA3	X	HIP8; HYPD; MAGE3; MAGEA6; MGC14613;	NM_005362.3	GeneID:4102	X:151688663-151689075	151688898
18149	cg18133966	0.599545	-139.253	139.253	1.18779e-14	-0.0450525	6972.43	149	0.183823	0.644597	0	1	6837.4	149	0.115412	PLA2G1B	12	PLA2; PLA2A; PPLA2; MGC119834; MGC119835;	NM_000928.2	GeneID:5319		119250101
16878	cg16831889	0.669038	-139.025	139.025	1.25179e-14	-0.0415993	3331.36	149	0.179362	0.710637	0	1	3250.75	149	0.112563	HDC	15		NM_002112.1	GeneID:3067		48345343
12780	cg12832649	0.0911781	138.715	138.715	1.34434e-14	0.0252729	25815.8	149	0.117163	0.0659052	0	1	25178.4	149	0.0727541	SPOCK	5	TIC1; SPOCK1; TESTICAN;	NM_004598.2	GeneID:6695	5:136861841-136863150	136862762
25484	cg25484904	0.223641	138.715	138.715	1.34434e-14	0.0374926	13897.7	149	0.169628	0.186148	0	1	14188.3	149	0.107069	FLJ21511	4		NM_025087.1	GeneID:80157	4:48682670-48683738	48682772
2745	cg02738086	0.724125	-138.679	138.679	1.35544e-14	-0.0379509	11409.4	149	0.173829	0.762076	0	1	11489.6	149	0.109911	POLR3H	22	RPC8; KIAA1665; MGC29654; MGC111097;	NM_138338.2	GeneID:171568	22:40271432-40271864	40271440
4435	cg04409427	0.824583	-138.662	138.662	1.36066e-14	-0.0294071	7031.24	149	0.136514	0.85399	0	1	7209.47	149	0.0871699	KCNE2	21	LQT5; LQT6; MIRP1; MGC138292;	NM_172201.1	GeneID:9992		34657893
13018	cg13097816	0.835512	-138.616	138.616	1.37521e-14	-0.0283219	17018.7	149	0.141971	0.863834	0	1	16919.1	149	0.0914336	GPR35	2		NM_005301.2	GeneID:2859		241217112
4079	cg04030848	0.637199	-138.587	138.587	1.38446e-14	-0.0432557	11369.8	149	0.168395	0.680455	0	1	11535.4	149	0.110318	GAL3ST1	22	CST;	NM_004861.1	GeneID:9514		29290881
4811	cg04749372	0.827283	-138.506	138.506	1.41062e-14	-0.0291267	29171.3	149	0.124882	0.85641	0	1	29413	149	0.0774241	INMT	7	MGC125940; MGC125941;	NM_006774.4	GeneID:11185		30758396
5500	cg05492113	0.758334	-138.335	138.335	1.46707e-14	-0.0352835	12673	149	0.172441	0.793618	0	1	12643.9	149	0.107583	TUB	11		NM_177972.1	GeneID:7275		8016908
21836	cg21856603	0.744249	-138.251	138.251	1.49603e-14	-0.0363877	6283.37	149	0.145862	0.780636	0	1	6198.59	149	0.0875472	ITGAE	17	CD103; HUMINAE;	NM_002208.3	GeneID:3682		3660572
10298	cg10375110	0.771816	-138.157	138.157	1.52869e-14	-0.0341482	12338.4	149	0.171888	0.805964	0	1	12146.9	149	0.106315	CHRNA9	4	NACHRA9; HSA243342;	NM_017581.2	GeneID:55584		40032200
7235	cg07258507	0.654266	-138.097	138.097	1.54989e-14	-0.0422933	14759.6	149	0.206771	0.69656	0	1	14893.6	149	0.129798	IL17E	14	IL25; IL-25; IL-17E;	NM_022789.2	GeneID:64806		22911965
26298	cg26309498	0.721792	-137.73	137.73	1.68671e-14	-0.0379936	9327.12	149	0.141848	0.759786	0	1	9138.32	149	0.0929113	EDAR	2	DL; ED3; ED5; ED1R; EDA3; EDA1R; EDA-A1R;	NM_022336.1	GeneID:10913	2:108972948-108973475	108973470
19614	cg19623751	0.786789	-137.717	137.717	1.69149e-14	-0.0328094	6325.08	149	0.143356	0.819598	0	1	6345.74	149	0.0949225	CEACAM7	19	CEA; CGM2;	NM_006890.1	GeneID:1087		46883403
2323	cg02284188	0.743762	-137.667	137.667	1.71116e-14	-0.036352	5105.12	149	0.177328	0.780114	0	1	5308.79	149	0.112852	TRIM49	11	RNF18;	NM_020358.2	GeneID:57093		89181320
2559	cg02554564	0.781415	-137.655	137.655	1.71605e-14	-0.0332699	8286.44	149	0.146557	0.814685	0	1	8238.66	149	0.0897796	NTF3	12	NT3; HDNF; NGF2; NGF-2; MGC129711;	NM_002527.3	GeneID:4908	12:5473265-5473465	5473392
4492	cg04457794	0.769416	-137.604	137.604	1.73608e-14	-0.0342836	6561.31	149	0.176928	0.8037	0	1	6580.11	149	0.115567	CTSE	1		NM_001910.2	GeneID:1510		204484277
415	cg00407150	0.73213	-137.577	137.577	1.74711e-14	-0.0372186	18902.8	149	0.169521	0.769349	0	1	18961.4	149	0.104424	GUP1	3	OACT3; C3orf3; MSTP002; KIAA1173;	NM_020707.2	GeneID:57467		42718798
11836	cg11880010	0.677669	-137.472	137.472	1.78958e-14	-0.040862	3171.06	149	0.185515	0.71853	0	1	3137.64	149	0.12497	KIAA0367	9	BMCC1; BNIPXL; A214N16.3; bA214N16.3;	NM_015225.1	GeneID:23273		78518464
25201	cg25203856	0.670213	-137.472	137.472	1.78958e-14	-0.0413033	7570.12	149	0.190821	0.711516	0	1	7711.4	149	0.146439	NALP14	11	NOD5; GC-LRR;	NM_176822.2	GeneID:338323		7016556
7566	cg07597976	0.620485	-137.395	137.395	1.82167e-14	-0.0438665	6349.52	149	0.193359	0.664352	0	1	6283.6	149	0.12238	CD19	16	B4; MGC12802;	NM_001770.3	GeneID:930		28850520
3938	cg03898365	0.520344	-137.383	137.383	1.82701e-14	-0.04706	4379.06	149	0.165833	0.567404	0	1	4481.54	149	0.13275	OR10A4	11	JCG5; OR10A4P;	NM_207186.1	GeneID:283297		6854067
9195	cg09256683	0.726613	-137.326	137.326	1.85102e-14	-0.0375892	4117.78	149	0.20041	0.764203	0	1	4081.64	149	0.128107	CCL14	17	CC-1; CC-3; CKb1; MCIF; NCC2; SY14; HCC-1; HCC-3; NCC-2; SCYL2; SCYA14;	NM_032962.2	GeneID:6358		31337750
4112	cg04057858	0.630644	-137.215	137.215	1.89907e-14	-0.0433645	13870.4	149	0.192061	0.674009	0	1	14155.6	149	0.116301	UNQ9391	8		NM_198464.1	GeneID:203074		10421173
2669	cg02658251	0.776564	-137.195	137.195	1.90757e-14	-0.0336306	21724.7	149	0.174293	0.810195	0	1	21592.5	149	0.112783	DEFB4	8	SAP1; DEFB2; HBD-2; DEFB-2; DEFB102;	NM_004942.2	GeneID:1673		7788776
13041	cg13126790	0.721581	-137.116	137.116	1.94285e-14	-0.037923	26939.6	149	0.191206	0.759504	0	1	27372.3	149	0.12267	FLJ27255	6		NM_207501.1	GeneID:401281		159930336
26993	cg27040030	0.141797	137.067	137.067	1.96476e-14	0.0303295	25472.5	149	0.131534	0.111467	0	1	25341.6	149	0.0779101	PDIA2	16	PDI; PDA2; PDIP; PDIR;	NM_006849.1	GeneID:64714	16:264831-266235	265185
23368	cg23400451	0.689981	-137.058	137.058	1.9687e-14	-0.0400406	3323.59	149	0.17728	0.730022	0	1	3275.2	149	0.115046	MYH4	17	MYH2B; MyHC-2B; MyHC-IIb;	NM_017533.1	GeneID:4622		10314453
20272	cg20311730	0.823565	-137.005	137.005	1.99283e-14	-0.0293348	11054.9	149	0.147484	0.8529	0	1	10981.7	149	0.0953205	NALP10	11	NOD8; PYNOD;	NM_176821.2	GeneID:338322		7941759
22911	cg22951794	0.742723	-136.973	136.973	2.00789e-14	-0.0363392	14631.1	149	0.158017	0.779062	0	1	14442.1	149	0.104742	OR10A5	11	JCG6; OR10A1; OR11-403;	NM_178168.1	GeneID:144124		6823856
25444	cg25455753	0.851678	-136.935	136.935	2.02512e-14	-0.0265133	10949.6	149	0.121481	0.878191	0	1	11015.2	149	0.0773374	C15orf32	15	FLJ32831; MGC129836; MGC129837;	NM_153040.1	GeneID:145858		90815974
24850	cg24887211	0.703767	-136.41	136.41	2.28586e-14	-0.0390566	6348.49	149	0.166982	0.742823	0	1	6237.3	149	0.102065	C14orf166B	14		NM_194287.1	GeneID:145497		76362378
2459	cg02442161	0.654042	-136.183	136.183	2.40824e-14	-0.0420191	5156.41	149	0.185738	0.696061	0	1	5367.67	149	0.118166	PI3	20	ESI; WAP3; SKALP; WFDC14; MGC13613;	NM_002638.2	GeneID:5266		43237051
15774	cg15746445	0.666629	-136.154	136.154	2.42466e-14	-0.0413168	7839.44	149	0.202315	0.707946	0	1	7780.36	149	0.125713	TRPM8	2	TRPP8; LTRPC6; MGC2849;	NM_024080.3	GeneID:79054		234489672
8468	cg08527127	0.605417	-135.972	135.972	2.52819e-14	-0.0442933	9174.05	149	0.176383	0.64971	0	1	9163.64	149	0.116605	C1orf94	1	MGC15882;	NM_032884.2	GeneID:84970		34416528
13997	cg14036856	0.707208	-135.972	135.972	2.52819e-14	-0.0387661	11148	149	0.170024	0.745974	0	1	11098.9	149	0.107915	MGC52423	1		NM_182517.1	GeneID:149466		43524150
6214	cg06244906	0.592348	-135.962	135.962	2.53408e-14	-0.0448045	15200.7	149	0.157448	0.637152	0	1	15149.3	149	0.100495	ZIM2	19		NT_011109.15	GeneID:23619	19:61998334-61999073	61998893
18093	cg18085435	0.723078	-135.92	135.92	2.55876e-14	-0.0376572	5472.5	149	0.192367	0.760736	0	1	5434.2	149	0.118065	ATP8B1	18	BRIC; FIC1; PFIC; ATPIC; PFIC1;	NM_005603.2	GeneID:5205	18:53550846-53551198	53551165
15358	cg15361750	0.34991	135.877	135.877	2.58375e-14	0.044313	4168.23	149	0.163572	0.305597	0	1	4121.8	149	0.108791	GPR77	19	C5L2;	NM_018485.1	GeneID:27202		52530972
24144	cg24199834	0.130871	135.877	135.877	2.58375e-14	0.0291329	9209.3	149	0.13751	0.101738	0	1	9000.25	149	0.0826664	POU4F2	4	BRN3B; BRN3.2; Brn-3b;	NM_004575.1	GeneID:5458	4:147778503-147781596	147779576
10405	cg10490064	0.730454	-135.564	135.564	2.77747e-14	-0.0370776	5355.54	149	0.147001	0.767531	0	1	5264.73	149	0.0958376	CRYBB2	22	CCA2; CRYB2; CRYB2A; D22S665;	NM_000496.1	GeneID:1415		23947422
23298	cg23323879	0.785398	-135.442	135.442	2.85614e-14	-0.032668	12759.1	149	0.145966	0.818066	0	1	12853.9	149	0.0925079	CILP	15	HsT18872;	NM_003613.2	GeneID:8483		63291587
10536	cg10624445	0.675348	-135.263	135.263	2.97673e-14	-0.0406805	25331.5	149	0.219136	0.716028	0	1	25810.5	149	0.14221	CNGB1	16	GAR1; GARP; CNCG2; RCNC2; RCNCb; CNCG3L; RCNCbeta;	NM_001297.1	GeneID:1258		56563625
8622	cg08678755	0.623176	-135.001	135.001	3.16126e-14	-0.0433721	4152.64	149	0.179902	0.666548	0	1	4259.01	149	0.116583	ENPP3	6	B10; NPP3; PDNP3; CD203c; PD-IBETA;	NM_005021.2	GeneID:5169		131998704
9871	cg09944526	0.731496	-134.883	134.883	3.2484e-14	-0.0369136	2815.75	149	0.162901	0.768409	0	1	2830.81	149	0.105429	EXOC6	10	SEC15L; Sec15p; FLJ1125; SEC15L1; FLJ11251; MGC33397; DKFZp761I2124;	NM_001013848.1	GeneID:54536		94584181
5236	cg05215575	0.688183	-134.561	134.561	3.49865e-14	-0.0398037	12777.4	149	0.18793	0.727987	0	1	12557.6	149	0.122253	FLJ25410	16		NM_144605.1	GeneID:124404		4778723
24961	cg24992780	0.842107	-134.558	134.558	3.50082e-14	-0.0272689	6818.32	149	0.132287	0.869376	0	1	7001.05	149	0.0858378	OR7C1	19	OR7C4; OR19-5; TPCR86; HSTPCR86P; CIT-HSP-146E8;	NM_198944.1	GeneID:26664		14772551
20275	cg20312687	0.724355	-134.008	134.008	3.97365e-14	-0.0373167	5001.54	149	0.180134	0.761671	0	1	5028.3	149	0.115995	DEFB118	20	ESC42; DEFB-18; C20orf63; dJ1018D12.3;	NM_054112.1	GeneID:117285		29420246
19336	cg19346193	0.842739	-133.86	133.86	4.11121e-14	-0.0271405	10671.5	149	0.11413	0.86988	0	1	10714.8	149	0.0724288	UROS	10		NM_000375.1	GeneID:7390		127503180
14903	cg14897096	0.783302	-133.794	133.794	4.17455e-14	-0.0326624	6430.78	149	0.192672	0.815965	0	1	6497.53	149	0.127812	PC	11	PCB;	NM_022172.1	GeneID:5091		66478649
15514	cg15518883	0.575137	-133.715	133.715	4.25079e-14	-0.04505	27456.2	149	0.178659	0.620187	0	1	28284.1	149	0.118443	SIT1	9	SIT; MGC125908; MGC125910; RP11-331F9.5;	NM_014450.2	GeneID:27240		35640561
15527	cg15531099	0.471615	-133.686	133.686	4.27917e-14	-0.0469948	11627.8	149	0.148176	0.51861	0	1	11401.5	149	0.118913	LCE1D	1	LEP4;	NM_178352.1	GeneID:353134		151037126
2462	cg02449608	0.842287	-133.525	133.525	4.4413e-14	-0.0271533	19199.4	149	0.135519	0.86944	0	1	19228.1	149	0.08343	C19orf18	19	MGC41906;	NM_152474.2	GeneID:147685		63178412
9283	cg09347151	0.137353	133.511	133.511	4.45584e-14	0.0294675	5767.65	149	0.146795	0.107886	0	1	6069.41	149	0.107193	MGC39606	X		NM_203306.1	GeneID:399668	X:134383127-134384321	134383206
13020	cg13098960	0.752178	-133.151	133.151	4.84061e-14	-0.0351319	9070.24	149	0.174022	0.78731	0	1	9051.49	149	0.11048	SOX15	17	SOX20; SOX26; SOX27;	NM_006942.1	GeneID:6665		7434875
4459	cg04431776	0.807409	-133.072	133.072	4.92901e-14	-0.030446	10331.1	149	0.114959	0.837855	0	1	10067	149	0.0769329	GAGE2	X	MGC96883; MGC96930; MGC96942;	NM_001472.1	GeneID:2574	X:49112981-49114113	49113639
300	cg00280894	0.66175	-133.067	133.067	4.93526e-14	-0.0411385	7217.99	149	0.200768	0.702889	0	1	7208.47	149	0.128954	NXF2	X	TAPL-2; FLJ20416;	NM_022053.1	GeneID:56001		101365619
13723	cg13782134	0.79649	-132.915	132.915	5.11046e-14	-0.0314118	9312.9	149	0.132214	0.827902	0	1	9208.39	149	0.0928041	UNQ2446	16		NM_198443.1	GeneID:123904		66476863
26722	cg26759925	0.713614	-132.912	132.912	5.11387e-14	-0.0379171	3667.49	149	0.169299	0.751531	0	1	3530.07	149	0.113017	IL1F9	2	IL1E; IL1H1; IL-1F9; IL-1H1; IL1RP2; IL-1RP2;	NM_019618.2	GeneID:56300		113452515
22397	cg22424746	0.681794	-132.846	132.846	5.19242e-14	-0.0399501	23377.3	149	0.19339	0.721744	0	1	23242	149	0.118555	VTCN1	1	B7X; B7H4; B7S1; B7-H4; B7h.5; PRO1291; FLJ22418; RP11-229A19.4;	NM_024626.1	GeneID:79679		117554836
10349	cg10432859	0.743689	-132.669	132.669	5.40866e-14	-0.0357215	3741.85	149	0.173299	0.779411	0	1	3804.9	149	0.112976	UGT1A7	2	UDPGT; UGT1G; UGT1*7;	NM_019077.2	GeneID:54577		234255329
11754	cg11812202	0.717867	-132.591	132.591	5.50617e-14	-0.0375812	3246.17	149	0.154116	0.755448	0	1	3268.66	149	0.101097	PNLIP	10	PL;	NM_000936.2	GeneID:5406		118295399
4621	cg04569804	0.774236	-132.497	132.497	5.62782e-14	-0.0332748	8153.56	149	0.124927	0.807511	0	1	8013.09	149	0.0791946	CSF1R	5	FMS; CSFR; FIM2; C-FMS; CD115;	NM_005211.2	GeneID:1436		149474007
4182	cg04132607	0.911863	-132.462	132.462	5.67244e-14	-0.0195424	27652.7	149	0.0886306	0.931406	0	1	27665.9	149	0.0555826	GATA5	20	bB379O24.1;	NT_011362.9	GeneID:140628	20:60474622-60475245	60474851
9664	cg09737668	0.868559	-132.462	132.462	5.67244e-14	-0.0243504	14098.2	149	0.115626	0.89291	0	1	14007.1	149	0.0702954	SLAMF9	1	SF2001; CD2F-10; CD84-H1; PRO4421; MGC88194;	NM_033438.1	GeneID:89886		158190149
16939	cg16899306	0.702108	-132.366	132.366	5.79909e-14	-0.0386077	5043	149	0.19616	0.740716	0	1	4963.78	149	0.165206	HLA-DQB2	6	HLA-DXB;	NM_182549.1	GeneID:3120		32840563
24995	cg25021182	0.835989	-132.293	132.293	5.89821e-14	-0.027656	15172.3	149	0.114983	0.863645	0	1	15495.9	149	0.0701033	ELA2B	1	MGC97052;	NM_015849.2	GeneID:51032		15675181
11416	cg11481351	0.806873	-132.291	132.291	5.90038e-14	-0.0304079	5339.93	149	0.128073	0.837281	0	1	5301.02	149	0.0831957	FNDC7	1	FLJ35838; RP11-293A10.2;	NM_173532.1	GeneID:163479		109066910
17760	cg17741572	0.859996	-132.173	132.173	6.06275e-14	-0.0252217	16324.5	149	0.112796	0.885218	0	1	16405.1	149	0.0701949	CFB	6	BF; BFD; GBG; CFAB; PBF2; H2-Bf;	NM_001710.4	GeneID:629		32022284
22332	cg22373097	0.677312	-132.173	132.173	6.06275e-14	-0.0401173	3644.74	149	0.186635	0.71743	0	1	3727.97	149	0.126999	KRTAP21-1	21	KAP21.1;	NM_181619.1	GeneID:337977		31050931
8169	cg08214029	0.666302	-132.133	132.133	6.11928e-14	-0.0407433	12128.4	149	0.210034	0.707045	0	1	12234.2	149	0.134569	CCL18	17	CKb7; PARC; AMAC1; DCCK1; MIP-4; AMAC-1; DC-CK1; SCYA18;	NM_002988.2	GeneID:6362		31415591
16840	cg16792160	0.742079	-132.093	132.093	6.17618e-14	-0.0357655	6194.96	149	0.160464	0.777845	0	1	6151.09	149	0.100593	ASAH2	10		XM_936277.1	GeneID:56624		51678599
21704	cg21697134	0.111729	132.047	132.047	6.24209e-14	0.0268243	16484.1	149	0.121507	0.0849046	0	1	16652.2	149	0.0798162	FN3K	17		NM_022158.2	GeneID:64122	17:78285772-78287131	78287128
7611	cg07643942	0.650404	-131.574	131.574	6.95921e-14	-0.041519	3396.85	149	0.188082	0.691923	0	1	3259.88	149	0.118216	LACRT	12	MGC71934;	NM_033277.1	GeneID:90070		53315414
15856	cg15798153	0.641076	-131.451	131.451	7.16044e-14	-0.0419729	5183.73	149	0.197849	0.683049	0	1	5247.43	149	0.12499	PFTK1	7	KIAA0834; PFTAIRE1;	NM_012395.2	GeneID:5218		90176797
4823	cg04761824	0.818998	-131.282	131.282	7.44338e-14	-0.0291813	5771	149	0.146613	0.848179	0	1	5969.97	149	0.0939465	2020-12-01	9	CTS9;	NM_017418.1	GeneID:50514		116944896
10111	cg10189695	0.10876	131.277	131.277	7.45264e-14	0.0264688	18528.8	149	0.128289	0.0822912	0	1	18519.9	149	0.0773947	GPR78	4		NM_080819.2	GeneID:27201	4:8632931-8634384	8633200
25299	cg25313204	0.457442	131.277	131.277	7.45264e-14	0.0463626	24168.1	149	0.173786	0.411079	0	1	23936.8	149	0.127001	SLC22A3	6	EMT; EMTH; OCT3;	NM_021977.2	GeneID:6581	6:160688754-160690468	160688791
6324	cg06351503	0.853414	-131.22	131.22	7.55179e-14	-0.025811	11038.5	149	0.115514	0.879225	0	1	11099.2	149	0.0680826	RDBP	6	RD; RDP; D6S45; NELF-E;	NM_002904.5	GeneID:7936		32036039
11939	cg11984608	0.786428	-131.088	131.088	7.78377e-14	-0.0320781	6128.6	149	0.1319	0.818506	0	1	6047.2	149	0.0768685	CLDN16	3	PCLN1;	NM_006580.2	GeneID:10686		191588249
13808	cg13853198	0.159594	130.942	130.942	8.04915e-14	0.0312027	5238.47	149	0.166481	0.128392	0	1	5189.25	149	0.107932	FCER1G	1		NM_004106.1	GeneID:2207		159451716
4463	cg04435377	0.922672	-130.656	130.656	8.59864e-14	-0.0181563	17711.1	149	0.0847416	0.940828	0	1	17946.5	149	0.0578608	FLJ31568	22		NM_152509.1	GeneID:150244		22074094
10168	cg10241097	0.743565	-130.654	130.654	8.60161e-14	-0.0354693	4547.38	149	0.170881	0.779034	0	1	4500.61	149	0.108478	UBL4B	1	FLJ25690;	NM_203412.1	GeneID:164153		110456183
12994	cg13062935	0.092609	130.638	130.638	8.63336e-14	0.0247632	9184.32	149	0.115772	0.0678458	0	1	8999.19	149	0.0723496	MRGPRX2	11	MRGX2;	NM_054030.2	GeneID:117194		19039090
24593	cg24641737	0.142412	130.638	130.638	8.63336e-14	0.0296422	14038.5	149	0.120787	0.11277	0	1	14107.1	149	0.0775787	DENND2D	1	FLJ22457; RP5-1180E21.2;	NM_024901.3	GeneID:79961		111544794
18354	cg18350391	0.658363	-130.581	130.581	8.74802e-14	-0.0409464	17370.6	149	0.145441	0.699309	0	1	17656.3	149	0.102187	IL32	16	NK4; TAIF; TAIFa; TAIFb; TAIFc; TAIFd; IL-32beta; IL-32alpha; IL-32delta; IL-32gamma;	NM_001012631.1	GeneID:9235		3055553
6502	cg06509940	0.814979	-130.511	130.511	8.88976e-14	-0.0294715	5934.26	149	0.149002	0.844451	0	1	6232.91	149	0.0971397	CD80	3	LAB7; CD28LG; CD28LG1;	NM_005191.2	GeneID:941		120761604
18170	cg18153060	0.760245	-130.379	130.379	9.16516e-14	-0.0341481	5419.9	149	0.136858	0.794393	0	1	5279.72	149	0.0893372	KRTHB4	12	HB4;	NM_033045.2	GeneID:3890		51066060
7799	cg07842062	0.738563	-130.261	130.261	9.41716e-14	-0.0357887	17455.2	149	0.158225	0.774352	0	1	17716.6	149	0.101726	MEFV	16	FMF; MEF; TRIM20; MGC126560; MGC126586;	NM_000243.1	GeneID:4210		3246525
8427	cg08475088	0.875848	-130.158	130.158	9.64295e-14	-0.0233772	19541	149	0.105529	0.899226	0	1	19588.5	149	0.0665343	NALP9	19	NOD6;	NM_176820.2	GeneID:338321		60941103
10811	cg10910525	0.607499	-130.146	130.146	9.66963e-14	-0.0432774	23562.3	149	0.188782	0.650776	0	1	23210.6	149	0.121301	HRC	19		NM_002152.2	GeneID:3270		54350044
21092	cg21122774	0.79709	-130.09	130.09	9.79467e-14	-0.0310371	10182	149	0.159378	0.828127	0	1	10113	149	0.098411	SARDH	9	SAR; SDH; SARD; DMGDHL1;	NM_007101.2	GeneID:1757		135594817
13967	cg14003512	0.695433	-130.025	130.025	9.94306e-14	-0.0387015	12139.3	149	0.17397	0.734134	0	1	12183	149	0.10541	PLGLB2	2	PLGP1;	NM_002665.3	GeneID:5342		87828661
3687	cg03668539	0.838446	-129.976	129.976	1.00547e-13	-0.0271845	7288.51	149	0.11993	0.865631	0	1	7276.38	149	0.0736226	PEX11G	19	MGC4281;	NM_080662.2	GeneID:92960	19:7459253-7460264	7459324
25468	cg25473396	0.0806417	129.839	129.839	1.03789e-13	0.0234278	23078.2	149	0.110507	0.0572138	0	1	22753.7	149	0.0723473	MPG	16	AAG; MDG; APNG; Mid1; anpg; PIG11; PIG16; CRA36.1;	NM_001015052.1	GeneID:4350		66819
4069	cg04014889	0.772992	-129.826	129.826	1.0409e-13	-0.0330524	6805.09	149	0.142094	0.806045	0	1	6733.46	149	0.0840782	MAGEL2	15	nM15; NDNL1;	NM_019066.2	GeneID:54551		21441686
19365	cg19372178	0.643528	-129.773	129.773	1.05368e-13	-0.0415883	10554.5	149	0.177697	0.685117	0	1	10299.5	149	0.112512	TMEM16G	2	NGEP; D-TMPP; IPCA-5; PCANAP5; PCANAP5L;	NM_001001666.1	GeneID:50636		241775353
21657	cg21660130	0.886518	-129.576	129.576	1.10245e-13	-0.0221776	15187.1	149	0.0878267	0.908696	0	1	15453.1	149	0.054338	CLCNKB	1	CLCKB; hClC-Kb; MGC24087;	NM_000085.1	GeneID:1188		16242830
6244	cg06277277	0.839022	-129.555	129.555	1.10795e-13	-0.0270863	8308.4	149	0.111752	0.866108	0	1	8156.81	149	0.067499	NR1I3	1	CAR; CAR1; MB67; CAR-SV1; CAR-SV4; CAR-SV6; CAR-SV7; CAR-SV8; CAR-SV9; CAR-BETA; CAR-SV10; CAR-SV12; CAR-SV13; CAR-SV14; CAR-SV21;	NM_005122.2	GeneID:9970		159474931
6677	cg06682185	0.778321	-129.528	129.528	1.11471e-13	-0.0325761	8360.16	149	0.146214	0.810897	0	1	8392	149	0.0923135	SERPINB5	18	PI5; maspin;	NT_025028.13	GeneID:5268	18:59308015-59308744	59308595
11242	cg11308639	0.646356	-129.313	129.313	1.17141e-13	-0.0413759	2277.23	149	0.1747	0.687732	0	1	2235.32	149	0.120705	BMP10	2	MGC126783;	NM_014482.1	GeneID:27302		68951776
13764	cg13812587	0.0801327	129.167	129.167	1.21138e-13	0.0233178	17711.1	149	0.104648	0.0568149	0	1	17800.9	149	0.0668012	TMEM15	9	KIAA1094;	NM_014908.3	GeneID:22845	9:130749001-130751149	130749292
24992	cg25020204	0.763411	-129.167	129.167	1.21138e-13	-0.0337449	29340.4	149	0.157114	0.797156	0	1	29389.4	149	0.100337	DBH	9	DBM;	NM_000787.2	GeneID:1621		135490055
819	cg00795812	0.555427	-129.124	129.124	1.22357e-13	-0.0448648	34209.3	149	0.183077	0.600292	0	1	35469.2	149	0.120289	PDCD1	2	PD1; CD279; SLEB2; hPD-1; hPD-l;	NM_005018.1	GeneID:5133	2:242450515-242450972	242450682
18731	cg18727700	0.724035	-129.104	129.104	1.22911e-13	-0.0366736	4122.38	149	0.182098	0.760709	0	1	4260.18	149	0.117447	SRPX2	X	SRPX; SRPUL;	NM_014467.1	GeneID:27286		99785586
9152	cg09214254	0.139512	128.968	128.968	1.26818e-13	0.0291778	13619.4	149	0.124746	0.110334	0	1	13471.2	149	0.0768469	SMOC2	6	SMAP2; MST117; MSTP117; MSTP140; bA37D8.1; bA270C4A.1; dJ421D16.1;	NM_022138.1	GeneID:64094	6:168584149-168586146	168584304
8818	cg08860143	0.678426	-128.947	128.947	1.27432e-13	-0.0395744	4597.01	149	0.202586	0.718	0	1	4519.11	149	0.126783	MYLPF	16	MRLC2; MGC13450; DKFZp779C0757;	NM_013292.2	GeneID:29895		30293268
17959	cg17928268	0.643038	-128.781	128.781	1.32416e-13	-0.0414578	9337.55	149	0.18913	0.684496	0	1	9514.2	149	0.11825	CST11	20	SC13; CST8L; dJ322G13.6;	NM_080830.2	GeneID:140880		23381503
10678	cg10779183	0.720144	-128.689	128.689	1.35245e-13	-0.0368863	13370.8	149	0.161284	0.75703	0	1	13547.7	149	0.114256	ELA3A	1	ELA3;	NM_005747.3	GeneID:10136		22201054
10645	cg10741760	0.138495	128.594	128.594	1.38217e-13	0.0290481	9659.93	149	0.163625	0.109446	0	1	9667.04	149	0.0988934	HTR6	1	5-HT6;	NM_000871.1	GeneID:3362	1:19863719-19865436	19864611
13295	cg13359415	0.0594553	128.594	128.594	1.38217e-13	0.0210275	19467.9	149	0.0895	0.0384278	0	1	19454.4	149	0.0516816	LGI2	4	LGIL2; FLJ10675; KIAA1916; MGC126808; MGC126810;	NM_018176.2	GeneID:55203	4:24640989-24642011	24641662
25473	cg25477904	0.796926	-128.572	128.572	1.38931e-13	-0.0308767	8788.48	149	0.142481	0.827803	0	1	8926.49	149	0.0872562	PSG1	19	SP1; B1G1; PBG1; CD66f; PSBG1; PSGGA; DHFRP2; FLJ90598; FLJ90654; PSGIIA-a; PSGIIA-b; PSGIIA-c; PSG IIA-d;	NM_006905.2	GeneID:5669		48075245
3245	cg03221914	0.606348	-128.535	128.535	1.40123e-13	-0.0430588	15532.3	149	0.193546	0.649407	0	1	15933.9	149	0.123479	HIST1H2AJ	6	H2A/E; H2AFE; dJ160A22.4;	NM_021066.2	GeneID:8331	6:27890819-27892154	27891310
22925	cg22967016	0.0995542	128.422	128.422	1.438e-13	0.0252703	12235.5	149	0.111585	0.0742839	0	1	12248.2	149	0.0695529	MICAL2	11	KIAA0750; MICAL2PV1; MICAL2PV2; DKFZp686H2469; DKFZp686H03148;	NM_014632.2	GeneID:9645	11:12088256-12089631	12088315
22354	cg22386774	0.741773	-128.294	128.294	1.48102e-13	-0.0352901	4767.42	149	0.155733	0.777063	0	1	4679.4	149	0.104509	CRYGA	2	CRYG1; CRYG5; CRY-g-A;	NM_014617.2	GeneID:1418		208737935
12595	cg12650635	0.665433	-128.19	128.19	1.51702e-13	-0.0401968	26655.9	149	0.169572	0.70563	0	1	27136	149	0.112253	AQP2	12	AQP-CD; WCH-CD; MGC34501;	NM_000486.3	GeneID:359		48630730
9788	cg09871315	0.237288	128.088	128.088	1.55328e-13	0.0369232	13905.2	149	0.185111	0.200365	0	1	14081.6	149	0.117734	HOXA2	7	HOX1K;	NM_006735.3	GeneID:3199	7:27108930-27109394	27109207
24980	cg25011395	0.767587	-128.065	128.065	1.56124e-13	-0.0332726	9767.19	149	0.160914	0.80086	0	1	9648.42	149	0.103128	CNTROB	17	LIP8; PP1221;	NM_053051.1	GeneID:116840	17:7775260-7775583	7775332
20810	cg20856834	0.678838	-128.04	128.04	1.57044e-13	-0.0394144	5859.09	149	0.196544	0.718252	0	1	5745.9	149	0.121108	OR12D3	6	hs6M1-27; MGC119267;	NM_030959.2	GeneID:81797		29450501
13850	cg13897449	0.671569	-127.88	127.88	1.62918e-13	-0.0398079	4596.14	149	0.182572	0.711377	0	1	4665.25	149	0.11824	PFKFB1	X	PFRX;	NM_002625.1	GeneID:5207		55038566
26891	cg26922202	0.631648	-127.84	127.84	1.64449e-13	-0.0418534	5872.31	149	0.191013	0.673501	0	1	5933.52	149	0.124501	OR2S2	9	OR37A; OST715;	NM_019897.1	GeneID:56656		35947984
9542	cg09600520	0.709115	-127.837	127.837	1.64562e-13	-0.0375062	5284.64	149	0.160505	0.746621	0	1	5157.65	149	0.097627	CDYL	6	CDYL1; MGC131936; DKFZP586C1622;	NM_004824.2	GeneID:9425		4651243
23228	cg23254045	0.627651	-127.837	127.837	1.64562e-13	-0.0420355	2524.79	149	0.167424	0.669686	0	1	2528.57	149	0.11288	TMCO5	15	FLJ35807; MGC35118;	NM_152453.2	GeneID:145942		36013746
24229	cg24287460	0.846828	-127.826	127.826	1.64949e-13	-0.0261463	13268.2	149	0.129778	0.872974	0	1	13117.5	149	0.0866635	CCDC48	3	FLJ12057;	NM_024768.1	GeneID:79825	3:130230544-130230763	130230716
7600	cg07637239	0.614101	-127.805	127.805	1.65779e-13	-0.0426198	8596.52	149	0.191965	0.656721	0	1	8581.08	149	0.122519	KCNK18	10	TRIK; TRESK; TRESK2; TRESK-2;	NM_181840.1	GeneID:338567		118947249
5458	cg05444024	0.892165	-127.68	127.68	1.70589e-13	-0.0214066	14652.5	149	0.103275	0.913571	0	1	14704.2	149	0.0677322	FUT6	19	FT1A;	NM_000150.1	GeneID:2528	19:5791770-5792128	5792072
1087	cg01072821	0.655607	-127.672	127.672	1.70923e-13	-0.0406416	19964.6	149	0.207931	0.696249	0	1	20488.1	149	0.132042	UNQ9391	8		NM_198464.1	GeneID:203074		10419575
17672	cg17667972	0.810354	-127.618	127.618	1.73041e-13	-0.0295747	7861.78	149	0.144697	0.839929	0	1	7817.61	149	0.0928703	KRT4	12	K4; CK4; CYK4; FLJ31692;	NM_002272.1	GeneID:3851		51494560
4321	cg04297093	0.817052	-127.588	127.588	1.74253e-13	-0.0289615	7610.11	149	0.135467	0.846013	0	1	7682.06	149	0.088554	KRTAP19-3	21	GTRHP; KAP19.3;	NM_181609.2	GeneID:337970		30786245
17062	cg17032587	0.636951	-127.55	127.55	1.758e-13	-0.0415545	6166.06	149	0.190836	0.678506	0	1	6108.5	149	0.120394	CNGA2	X	CNCA; CNG2; CNCA1; OCNC1; OCNCa; FLJ46312; OCNCALPHA;	NM_005140.1	GeneID:1260		150653903
9067	cg09120035	0.82543	-127.518	127.518	1.77097e-13	-0.028176	10650.7	149	0.132054	0.853606	0	1	10649.3	149	0.0833332	CYP11B1	8	FHI; CPN1; CYP11B; P450C11; FLJ36771; DKFZp686B05283;	NM_000497.3	GeneID:1584		143958147
15528	cg15532088	0.847546	-127.335	127.335	1.84718e-13	-0.0260267	11700.5	149	0.131369	0.873572	0	1	11527.1	149	0.0826586	C17orf66	17	FLJ32830;	NM_152781.2	GeneID:256957		31219247
21082	cg21115977	0.663167	-127.3	127.3	1.86226e-13	-0.0401806	19965.6	149	0.213154	0.703347	0	1	19783	149	0.136508	GDF2	10	BMP9; BMP-9;	NM_016204.1	GeneID:2658	10:48036256-48036536	48036516
22113	cg22152667	0.884222	-127.297	127.297	1.86316e-13	-0.0222365	7285.46	149	0.0857102	0.906458	0	1	7497.63	149	0.0639418	OCM	7	OM; ONCM;	NM_006188.2	GeneID:4951	7:97457217-97457435	97457308
9241	cg09299388	0.792168	-127.257	127.257	1.88044e-13	-0.0311326	6738.27	149	0.12667	0.823301	0	1	6776.13	149	0.084005	PGK2	6	PGKB; PGK-2; PGKPS; dJ417L20.2;	NM_138733.2	GeneID:5232		49863149
15799	cg15759873	0.698518	-127.245	127.245	1.88565e-13	-0.0381001	3049.85	149	0.176726	0.736618	0	1	2985.55	149	0.113715	ATP6V1E2	2	VMA4; ATP6E1; ATP6EL2; MGC9341; ATP6V1EL2;	NM_080653.3	GeneID:90423		46600438
6753	cg06765947	0.843566	-127.24	127.24	1.88803e-13	-0.0264077	14392	149	0.0927631	0.869974	0	1	14573.5	149	0.0599632	UROC1	3	FLJ31300; HMFN0320;	NM_144639.1	GeneID:131669		127719432
25701	cg25720804	0.0979789	127.14	127.14	1.93192e-13	0.024982	13990.5	149	0.115609	0.0729969	0	1	13909.2	149	0.0805958	TLX3	5	RNX; HOX11L2; MGC29804;	NM_021025.2	GeneID:30012	5:170667594-170672661	170668994
23300	cg23324787	0.600954	-127.094	127.094	1.95259e-13	-0.0430272	2941.21	149	0.169629	0.643981	0	1	2968.31	149	0.114162	RAG2	11		NM_000536.1	GeneID:5897		36576270
6097	cg06141025	0.712912	-127.048	127.048	1.97338e-13	-0.0371394	5858.02	149	0.17757	0.750051	0	1	6086.31	149	0.114163	GYS2	12		NM_021957.2	GeneID:2998		21648733
5995	cg06007645	0.768589	-127.037	127.037	1.9782e-13	-0.0330588	5171.48	149	0.16597	0.801648	0	1	5232.66	149	0.112941	C1orf175	1	FLJ46354;	NM_198547.1	GeneID:374977		54880009
21862	cg21890738	0.0973027	127.027	127.027	1.98285e-13	0.0249024	23357.9	149	0.103394	0.0724003	0	1	23364	149	0.0648984	CYB561	17	FRRS2;	NM_001915.3	GeneID:1534	17:58876701-58878285	58877003
20350	cg20377762	0.840276	-126.98	126.98	2.00466e-13	-0.0267015	6065.55	149	0.106407	0.866978	0	1	6263.72	149	0.0685189	TMEM61	1		NM_182532.1	GeneID:199964	1:55218421-55219773	55219616
19939	cg19954000	0.798248	-126.932	126.932	2.02661e-13	-0.030567	10819	149	0.14048	0.828815	0	1	10737.7	149	0.0912993	FGF1	5	AFGF; ECGF; FGFA; ECGFA; ECGFB; HBGF1; GLIO703; ECGF-beta; FGF-alpha;	NM_033136.1	GeneID:2246		142045855
21098	cg21130124	0.858241	-126.892	126.892	2.04531e-13	-0.0249109	9773.01	149	0.110861	0.883152	0	1	9806.25	149	0.0703775	CALML5	10	CLSP;	NM_017422.3	GeneID:51806		5532328
18052	cg18043195	0.86566	-126.857	126.857	2.0621e-13	-0.0241497	13974.9	149	0.11441	0.88981	0	1	13970.4	149	0.0688697	C9orf138	9	FLJ35283; MGC35182;	NM_153707.1	GeneID:158297	9:19022988-19023266	19023231
3762	cg03741352	0.773977	-126.828	126.828	2.07568e-13	-0.0325968	23080.5	149	0.141631	0.806574	0	1	23340.6	149	0.087115	LCE3C	1	LEP15; SPRL3A;	NM_178434.1	GeneID:353144		150840074
9621	cg09676390	0.686206	-126.816	126.816	2.08152e-13	-0.0387884	30689.1	149	0.152871	0.724994	0	1	30537.5	149	0.0980836	ADARB1	21	RED1; ADAR2; ADAR2d; ADAR2g; DRABA2; DRADA2; ADAR2a-L1; ADAR2a-L2; ADAR2a-L3;	NM_001112.2	GeneID:104	21:45317770-45320123	45317773
22412	cg22441882	0.633426	-126.816	126.816	2.08152e-13	-0.0415974	7449.59	149	0.198446	0.675023	0	1	7379.37	149	0.125316	SLC18A1	8	CGAT; VAT1; VMAT1;	NM_003053.1	GeneID:6570		20084934
13963	cg14001035	0.710782	-126.802	126.802	2.08843e-13	-0.0372416	3407.41	149	0.151411	0.748024	0	1	3336.86	149	0.0977147	ATP10A	15	ATPVA; ATPVC; ATP10C; KIAA0566;	NT_026446.13	GeneID:57194	15:23577189-23577798	23577245
22428	cg22461018	0.697246	-126.73	126.73	2.1232e-13	-0.0381001	6702.62	149	0.160103	0.735346	0	1	6789.95	149	0.103586	MORF4	4	CSR; SEN; CSRB; SEN1;	NM_006792.2	GeneID:10934		174774586
17268	cg17237881	0.876253	-126.724	126.724	2.12642e-13	-0.0230326	17086.4	149	0.0937314	0.899286	0	1	17352.8	149	0.0558623	BIRC7	20	KIAP; LIVIN; MLIAP; RNF50; ML-IAP;	NM_022161.2	GeneID:79444		61337978
12071	cg12114524	0.731849	-126.576	126.576	2.20014e-13	-0.0357687	6747.48	149	0.148303	0.767618	0	1	6661.09	149	0.0956287	TNNI1	1	TNN1; DKFZp451O223;	NM_003281.3	GeneID:7135		199657417
11131	cg11206634	0.676127	-126.416	126.416	2.28218e-13	-0.0393183	7487.36	149	0.167238	0.715445	0	1	7392.6	149	0.106773	SFT2D3	2	MGC5391;	NM_032740.3	GeneID:84826	2:128174687-128174933	128174869
26902	cg26937148	0.103307	126.375	126.375	2.30425e-13	0.0254377	12263.1	149	0.120502	0.0778692	0	1	12362.9	149	0.0804621	NR2F1	5	EAR3; EAR-3; NR2F2; SVP44; ERBAL3; TFCOUP1; COUP-TFI; TCFCOUP1;	NM_005654.4	GeneID:7025	5:92945272-92947325	92945403
12944	cg13005002	0.659009	-126.362	126.362	2.31111e-13	-0.0402517	3600.02	149	0.183859	0.69926	0	1	3455.43	149	0.115443	RFPL3	22		NM_006604.1	GeneID:10738		31082769
3376	cg03364781	0.696321	-126.343	126.343	2.32119e-13	-0.0381006	5473.99	149	0.168946	0.734422	0	1	5565.26	149	0.107582	ALPK1	4	LAK; FLJ22670; KIAA1527; 8430410J10Rik;	NM_025144.2	GeneID:80216		113518042
15195	cg15201877	0.133491	126.175	126.175	2.41268e-13	0.0283273	30596.7	149	0.121983	0.105164	0	1	29897.1	149	0.0749259	PTGER3	1	EP3; EP3e; EP3-I; EP3-II; EP3-IV; EP3-III; MGC27302;	NM_000957.2	GeneID:5733	1:71284051-71286545	71285561
26656	cg26692016	0.718403	-126.085	126.085	2.46297e-13	-0.0366321	3096.06	149	0.164279	0.755035	0	1	3102.54	149	0.106528	APOBEC1	12	BEDP; CDAR1; apobec-1;	NM_005889.2	GeneID:339		7709111
10399	cg10486998	0.13169	126.081	126.081	2.46547e-13	0.0281449	10606.3	149	0.120857	0.103545	0	1	10505.3	149	0.0798509	GALR1	18	GALNR; GALNR1;	NM_001480.2	GeneID:2587	18:73090255-73093032	73090775
16727	cg16673198	0.700566	-126.058	126.058	2.47851e-13	-0.0377929	3527.28	149	0.17012	0.738359	0	1	3516.34	149	0.107683	CPNE4	3	CPN4; COPN4; MGC15604;	NM_130808.1	GeneID:131034	3:133236061-133236984	133236963
1608	cg01593385	0.672656	-126.029	126.029	2.49528e-13	-0.0394545	3584.84	149	0.182015	0.71211	0	1	3677.22	149	0.118127	FGG	4		NM_000509.4	GeneID:2266		155753599
10346	cg10431340	0.624044	-125.902	125.902	2.56945e-13	-0.0418735	2957.7	149	0.173905	0.665917	0	1	2952.08	149	0.113369	MPZ	1	P0; CHM; DSS; MPP; CMT1; CMT1B; CMT2I; CMT2J; CMT4E; CMTDI3; HMSNIB;	NM_000530.3	GeneID:4359		159545732
11793	cg11843304	0.689632	-125.883	125.883	2.58071e-13	-0.0384422	5884.16	149	0.20702	0.728075	0	1	5914.94	149	0.129635	PTPRO	12	PTPU2; GLEPP1; PTP-U2;	NT_009714.16	GeneID:5800	12:15392536-15393111	15392604
11856	cg11898695	0.676544	-125.831	125.831	2.6115e-13	-0.0392038	8490.23	149	0.179379	0.715748	0	1	8431.69	149	0.11757	PTCRA	6	PTA; PT-ALPHA;	NM_138296.1	GeneID:171558		42991482
25371	cg25391023	0.669524	-125.783	125.783	2.64046e-13	-0.0395914	4563.94	149	0.177044	0.709115	0	1	4669.8	149	0.114174	BTNL2	6	BTL-II; HSBLMHC1;	NM_019602.1	GeneID:56244		32482732
7972	cg08007665	0.732627	-125.762	125.762	2.65338e-13	-0.0356006	8632.33	149	0.177916	0.768227	0	1	8387.82	149	0.111014	KCNQ1	11	LQT; RWS; WRS; LQT1; ATFB1; KCNA8; KCNA9; Kv1.9; Kv7.1; KVLQT1;	NT_009237.17	GeneID:3784	11:2550370-2550883	2550433
11169	cg11237817	0.779398	-125.69	125.69	2.69786e-13	-0.0320108	19562	149	0.143435	0.811409	0	1	19106.1	149	0.0967539	KIR3DL3	19	KIR44; KIRC1; CD158Z; KIR3DL7; KIR3DL3var;	NM_153443.2	GeneID:115653		59927574
3092	cg03075662	0.719678	-125.673	125.673	2.70857e-13	-0.0364853	3053.72	149	0.184879	0.756163	0	1	3159.97	149	0.123439	PLSCR2	3		NM_020359.1	GeneID:57047		147696338
7347	cg07364841	0.845733	-125.668	125.668	2.7115e-13	-0.026035	9139.88	149	0.115013	0.871768	0	1	9097.95	149	0.0691095	HGFAC	4	HGFA; MGC138395; MGC138397;	NM_001528.2	GeneID:3083		3413945
13299	cg13364756	0.81172	-125.563	125.563	2.7776e-13	-0.0292159	5750.94	149	0.132061	0.840936	0	1	5691.25	149	0.0790802	CYP3A43	7		NM_022820.3	GeneID:64816		99263129
25157	cg25162301	0.856182	-125.525	125.525	2.80253e-13	-0.0249861	13187.5	149	0.107937	0.881168	0	1	13062.8	149	0.0682988	AHSG	3	AHS; A2HS; HSGA; FETUA;	NM_001622.1	GeneID:197		187812749
12316	cg12397274	0.644921	-125.517	125.517	2.8075e-13	-0.0408349	3554.43	149	0.170303	0.685756	0	1	3566.56	149	0.11315	TINAG	6	TIN1; TIN2; TIN-AG;	NM_014464.2	GeneID:27283		54280142
12759	cg12811135	0.848696	-125.511	125.511	2.81138e-13	-0.0257279	8524.52	149	0.12121	0.874425	0	1	8521.43	149	0.081442	FLJ25369	2		NM_152670.1	GeneID:200523		88605587
23256	cg23278885	0.799342	-125.266	125.266	2.97468e-13	-0.0302749	10874.5	149	0.156325	0.829617	0	1	10890.3	149	0.088782	TGM6	20	TGY; TGM3L; dJ734P14.3;	NM_198994.1	GeneID:343641		2309431
10173	cg10246520	0.901618	-125.183	125.183	3.03145e-13	-0.0201657	9899.56	149	0.0870834	0.921784	0	1	9942.78	149	0.0528272	OLFM4	13	GC1; OlfD; GW112; KIAA4294; bA209J19.1;	NM_006418.3	GeneID:10562		52499945
15702	cg15677294	0.673695	-125.053	125.053	3.12356e-13	-0.0392461	17147.5	149	0.182461	0.712941	0	1	17156.1	149	0.117449	TUBB4	19	TUBB5; beta-5;	NM_006087.2	GeneID:10382		6453938
8862	cg08906015	0.721595	-125.013	125.013	3.15304e-13	-0.0362625	5685.16	149	0.178152	0.757857	0	1	5529.1	149	0.113624	MGC15476	19		NM_145056.1	GeneID:147906		51849665
17753	cg17738194	0.649728	-125.006	125.006	3.1582e-13	-0.0405151	5549.78	149	0.204782	0.690243	0	1	5150.68	149	0.129739	GK2	4	GKP2; GKTA;	NM_033214.2	GeneID:2712	4:80548404-80548638	80548412
7647	cg07676849	0.639095	-124.972	124.972	3.18258e-13	-0.0410302	2918.84	149	0.179562	0.680126	0	1	2893.55	149	0.116558	FOLR3	11	FR-G; FR-gamma; gamma-hFR;	NM_000804.2	GeneID:2352		71523313
26301	cg26312920	0.657375	-124.876	124.876	3.25349e-13	-0.0401028	3284.25	149	0.16239	0.697477	0	1	3338.96	149	0.100371	NEUROD6	7	Atoh2; NEX1M; Math-2;	NM_022728.2	GeneID:63974		31346915
19854	cg19863405	0.822592	-124.822	124.822	3.29488e-13	-0.0281451	7498.98	149	0.128605	0.850737	0	1	7406.58	149	0.0784033	ACTL7B	9		NM_006686.2	GeneID:10880		110658891
12820	cg12870705	0.0989413	124.8	124.8	3.31154e-13	0.0248504	7496.07	149	0.101886	0.0740909	0	1	7516.52	149	0.0640773	NRP1	10	NRP; CD304; VEGF165R; DKFZp781F1414; DKFZp686A03134;	NM_001024629.1	GeneID:8829	10:33662986-33666332	33664629
1566	cg01545079	0.90122	-124.777	124.777	3.32897e-13	-0.0201778	14685.9	149	0.0850457	0.921398	0	1	14655.1	149	0.0509709	CPNE6	14	N-COPINE;	NM_006032.2	GeneID:9362		23611217
9860	cg09935228	0.837888	-124.439	124.439	3.59865e-13	-0.0266704	5536	149	0.117452	0.864558	0	1	5522.62	149	0.0770303		8			GeneID:137529		81720205
4497	cg04460372	0.221293	124.391	124.391	3.63831e-13	0.0352852	15885	149	0.138615	0.186007	0	1	16070.6	149	0.0907415	ST6GALNAC6	9	SIAT7F; ST6GALNACVI; RP11-203J24.3;	NM_013443.3	GeneID:30815	9:129700979-129702035	129700996
1245	cg01237132	0.732958	-124.35	124.35	3.67248e-13	-0.0353828	4777.74	149	0.178576	0.76834	0	1	4926.7	149	0.115544	CST2	20	MGC71924;	NM_001322.2	GeneID:1470		23755958
24438	cg24477636	0.802493	-124.076	124.076	3.91165e-13	-0.0298646	6198.92	149	0.123355	0.832357	0	1	6421.63	149	0.0775166	OR10H1	19		NM_013940.1	GeneID:26539		15780005
6003	cg06025017	0.753334	-124.075	124.075	3.91273e-13	-0.0338593	4645.11	149	0.168409	0.787193	0	1	4665.19	149	0.108829	RGSL2	1	DKFZp434E169;	NM_032267.1	GeneID:84227		180685841
19313	cg19320612	0.784423	-124.062	124.062	3.92437e-13	-0.0313975	4952.06	149	0.147128	0.81582	0	1	4980.68	149	0.0930193	SCN9A	2	PN1; NENA; NE-NA; Nav1.7;	NM_002977.1	GeneID:6335		166876436
17518	cg17496921	0.368961	123.967	123.967	4.01181e-13	0.0430061	11493.7	149	0.17133	0.325954	0	1	11614.5	149	0.125822	TSPAN16	19	TM-8; TM4-B; TM4SF16;	NM_012466.2	GeneID:26526		11267993
471	cg00462994	0.0867699	123.793	123.793	4.17513e-13	0.0235278	23399.2	149	0.101402	0.0632422	0	1	23468.7	149	0.0578603	NAGS	17	AGAS; ARGA;	NM_153006.2	GeneID:162417	17:39437410-39438278	39437481
18042	cg18023080	0.769825	-123.721	123.721	4.24541e-13	-0.0325387	9365.16	149	0.151171	0.802364	0	1	9300.88	149	0.0961746	MASP2	1	sMAP; MAP19; MASP-2;	NM_139208.1	GeneID:10747		11029971
1821	cg01796228	0.677825	-123.613	123.613	4.35201e-13	-0.0387936	4603.4	149	0.194425	0.716619	0	1	4494.94	149	0.121885	LIFR	5	SWS; SJS2; STWS; CD118;	NM_002310.3	GeneID:3977	5:38631543-38631985	38631977
9393	cg09458237	0.612356	-123.481	123.481	4.4859e-13	-0.0419699	8937.86	149	0.183406	0.654326	0	1	8941.94	149	0.115951	HSPA12B	20	C20orf60; FLJ32150; MGC131912; dJ1009E24.2;	NM_052970.3	GeneID:116835		3660191
3462	cg03440846	0.752961	-123.436	123.436	4.53284e-13	-0.0338039	10146.5	149	0.156838	0.786765	0	1	10172.8	149	0.0982463	ACSS2	20	ACS; ACSA; ACAS2; AceCS; MYH7B; dJ1161H23.1; DKFZp762G026;	NM_018677.2	GeneID:55902		32926021
5568	cg05564251	0.615287	-123.416	123.416	4.55397e-13	-0.0418382	11516.6	149	0.199399	0.657126	0	1	11625.2	149	0.133225	SP140	2	LYSP100-A; LYSP100-B;	NM_007237.3	GeneID:11262		230798884
24188	cg24243265	0.757971	-123.081	123.081	4.91949e-13	-0.0333794	3733.31	149	0.144333	0.791351	0	1	3707.97	149	0.0931275	MLZE	8		NM_031415.1	GeneID:56169		130869033
24653	cg24690731	0.170019	122.887	122.887	5.14446e-13	0.0311494	10767.7	149	0.144792	0.13887	0	1	10898.3	149	0.0850939	SOX7	8	MGC10895;	NM_031439.2	GeneID:83595	8:10624002-10628691	10626503
21576	cg21589115	0.153076	122.844	122.844	5.19505e-13	0.0297066	21233.7	149	0.138928	0.123369	0	1	20590.2	149	0.0867047	DKKL1	19	SGY; SGY1; SGY-1;	NM_014419.3	GeneID:27120	19:54557784-54559479	54558926
551	cg00532335	0.590536	-122.666	122.666	5.41302e-13	-0.0426606	9103.25	149	0.180423	0.633197	0	1	9116.19	149	0.123905	LGI1	10	EPT; ETL1; IB1099;	NM_005097.1	GeneID:9211		95506851
2659	cg02649337	0.915385	-122.666	122.666	5.41302e-13	-0.0184444	20814.8	149	0.0898688	0.933829	0	1	21195.9	149	0.0676287	MAGEA9	X	MAGE9; MGC8421;	NM_005365.4	GeneID:4108		148671471
22791	cg22826936	0.0726069	122.631	122.631	5.45657e-13	0.0219559	15945.2	149	0.0921943	0.050651	0	1	15985.8	149	0.0575922	ULK2	17	Unc51.2; KIAA0623;	NM_014683.2	GeneID:9706	17:19710096-19712550	19711035
20192	cg20226764	0.620112	-122.627	122.627	5.46135e-13	-0.0415073	12684.8	149	0.169697	0.66162	0	1	12759.6	149	0.105809	MLN	6		NM_002418.1	GeneID:4295		33879909
22258	cg22285621	0.320508	122.595	122.595	5.50187e-13	0.0408324	30567.3	149	0.199667	0.279675	0	1	30975.3	149	0.126291	SSH3	11	SSH-3; FLJ10928; FLJ20515;	NM_018276.2	GeneID:54961	11:66826951-66828421	66827898
5617	cg05615150	0.588857	-122.591	122.591	5.50719e-13	-0.0427042	5293.72	149	0.176599	0.631561	0	1	5215.26	149	0.119179	ARPP-21	3		NM_198399.1	GeneID:10777		35658819
13676	cg13735697	0.8685	-122.498	122.498	5.62574e-13	-0.0234611	20687.3	149	0.0815627	0.891961	0	1	20800.2	149	0.0484424	MYOG	1	MYF4; MYOGENIN;	NM_002479.3	GeneID:4656		201321919
6133	cg06179485	0.212462	122.436	122.436	5.7065e-13	0.0343817	9587.29	149	0.155716	0.17808	0	1	9667.7	149	0.0993901	TMEM54	1	BCLP; CAC-1; MGC10137;	NM_033504.2	GeneID:113452	1:33139063-33140371	33139988
147	cg00134787	0.72305	-122.385	122.385	5.77418e-13	-0.0357956	3757.18	149	0.170691	0.758845	0	1	3800.23	149	0.112233	MYH1	17	MYHa; MYHSA1; MyHC-2X/D;	NM_005963.2	GeneID:4619		10360224
18360	cg18356799	0.726271	-122.371	122.371	5.79349e-13	-0.0355741	5623.4	149	0.151201	0.761846	0	1	5499.95	149	0.0990306	DSC1	18	CDHF1; DG2/DG3;	NM_024421.1	GeneID:1823		26996631
6744	cg06757810	0.737746	-122.365	122.365	5.8011e-13	-0.034772	3323.41	149	0.166314	0.772519	0	1	3496.96	149	0.111382	CNGB3	8	ACHM3;	NM_019098.2	GeneID:54714		87825644
17532	cg17505463	0.73677	-122.317	122.317	5.86543e-13	-0.0348347	19667.7	149	0.191319	0.771604	0	1	20207.9	149	0.114692	GGT2	22	GGT;	NM_002058.1	GeneID:2679		17160198
21194	cg21229055	0.127373	122.252	122.252	5.95415e-13	0.0273351	9428.48	149	0.118383	0.100038	0	1	9654.17	149	0.0722411	GPM6B	X	M6B; MGC17150; MGC54284;	NM_001001995.1	GeneID:2824	X:13865701-13867179	13867154
18904	cg18913171	0.737427	-122.214	122.214	6.00579e-13	-0.0347737	2951.09	149	0.149948	0.7722	0	1	2958.17	149	0.100222	SLAMF9	1	SF2001; CD2F-10; CD84-H1; PRO4421; MGC88194;	NM_033438.1	GeneID:89886		158192040
16051	cg15975283	0.81696	-122.014	122.014	6.28941e-13	-0.0283515	7239.53	149	0.127163	0.845311	0	1	7198.28	149	0.0815445	SLC9A11	1	MGC43026; RP3-436N22.2;	NM_178527.2	GeneID:284525		171837968
12472	cg12552392	0.724531	-121.915	121.915	6.43413e-13	-0.0356285	4792.27	149	0.186155	0.76016	0	1	4832.36	149	0.117614	NFS1	20	NIFS; HUSSY-08;	NM_181679.1	GeneID:9054		33751925
15614	cg15602735	0.768689	-121.878	121.878	6.48933e-13	-0.0323941	11600.7	149	0.149457	0.801083	0	1	11718.5	149	0.0909235	MAGEC2	X	CT10; HCA587; MAGEE1; MGC13377;	NM_016249.2	GeneID:51438		141120999
2847	cg02847216	0.849745	-121.859	121.859	6.51853e-13	-0.0252677	19853.9	149	0.1197	0.875012	0	1	19774.2	149	0.0768439	CTAGE1	18	CTAGE-1; CTAGE-2;	NM_022663.1	GeneID:64693	18:18251775-18252151	18251801
1472	cg01454134	0.655664	-121.755	121.755	6.6756e-13	-0.039701	10332.4	149	0.160595	0.695365	0	1	10151.7	149	0.110629	GALP	19		NM_033106.1	GeneID:85569	19:61377980-61378572	61378519
20870	cg20910746	0.681017	-121.685	121.685	6.78453e-13	-0.0383167	4644.44	149	0.159296	0.719334	0	1	4542.85	149	0.100122	BBOX1	11	BBH; BBOX; G-BBH; gamma-BBH;	NM_003986.1	GeneID:8424		27018992
14055	cg14088161	0.631404	-121.66	121.66	6.82354e-13	-0.0408514	6849.48	149	0.156293	0.672256	0	1	6729.18	149	0.100628	ACTL6B	7	ACTL6; BAF53B;	NM_016188.3	GeneID:51412		100092979
25055	cg25076881	0.561222	-121.633	121.633	6.86562e-13	-0.0433931	9966.82	149	0.18296	0.604615	0	1	9984.38	149	0.117545	OR10J1	1	HGMP07J; HSHGMP07J;	NM_012351.1	GeneID:26476		157676460
26707	cg26751195	0.687201	-121.537	121.537	7.01972e-13	-0.037935	7295.28	149	0.168587	0.725136	0	1	7242.93	149	0.10647	SPN	16	LSN; CD43; GPL115;	NM_003123.3	GeneID:6693	16:29581106-29581337	29581181
9146	cg09207718	0.830942	-121.309	121.309	7.39793e-13	-0.0269989	15340.8	149	0.137733	0.857941	0	1	15321.3	149	0.0856506	CYP1A2	15	CP12; P3-450; P450(PA);	NM_000761.3	GeneID:1544		72828439
18491	cg18484189	0.655463	-121.306	121.306	7.40355e-13	-0.0396398	7515.26	149	0.199552	0.695102	0	1	7399.12	149	0.12535	NALP10	11	NOD8; PYNOD;	NM_176821.2	GeneID:338322		7941549
10131	cg10212621	0.765393	-121.277	121.277	7.45212e-13	-0.0325732	12930.5	149	0.146452	0.797966	0	1	13033.9	149	0.093087	HMGCS2	1		NM_005518.2	GeneID:3158		120113172
10463	cg10539507	0.121335	121.188	121.188	7.60729e-13	0.0266607	8107.25	149	0.116581	0.0946739	0	1	8089.38	149	0.0759898	NKX6-1	4	NKX6A; NKX6.1;	NM_006168.1	GeneID:4825	4:85635605-85639977	85639806
25741	cg25762706	0.735205	-120.595	120.595	8.71987e-13	-0.0347106	11169.9	149	0.144351	0.769916	0	1	11082	149	0.104061	STMN4	8	RB3;	NM_030795.2	GeneID:81551		27171784
12520	cg12584889	0.733662	-120.314	120.314	9.30208e-13	-0.0347807	6858.95	149	0.165346	0.768443	0	1	6828.11	149	0.105126	NXF3	X		NM_022052.1	GeneID:56000		102234581
231	cg00213044	0.783651	-120.252	120.252	9.43691e-13	-0.0309985	34732.8	149	0.171118	0.81465	0	1	34624.1	149	0.110737	KRT6C	12	K6C; CK6C;	NM_058242.1	GeneID:140446		51172705
22715	cg22762309	0.747565	-120.221	120.221	9.50452e-13	-0.0337772	7259.94	149	0.165985	0.781342	0	1	7470.99	149	0.104757	OTUD6A	X	HSHIN6; FLJ25831;	NM_207320.1	GeneID:139562	X:69198820-69200785	69198828
2744	cg02737335	0.761063	-120.198	120.198	9.55388e-13	-0.0327689	13824.2	149	0.163621	0.793832	0	1	13346.6	149	0.102806	ARHGEF16	1	NBR; GEF16;	NM_014448.2	GeneID:27237	1:3369484-3369753	3369744
3114	cg03098643	0.135899	120.15	120.15	9.66029e-13	0.027887	17092.7	149	0.133374	0.108012	0	1	16523	149	0.0855063	FAT	4	ME5; FAT1; CDHF7; hFat1;	NM_005245.3	GeneID:2195	4:187881199-187883139	187881614
12167	cg12237269	0.688732	-119.941	119.941	1.01365e-12	-0.0376087	9273.76	149	0.180679	0.726341	0	1	9293.03	149	0.112494	SLN	11	MGC12301;	NM_003063.1	GeneID:6588		107087944
10786	cg10889792	0.848777	-119.795	119.795	1.04836e-12	-0.02516	18232.2	149	0.112922	0.873937	0	1	18215.6	149	0.0719813	KRTAP5-9	11	KRN1; KRTAP5-1; KRTAP5.9;	NM_005553.2	GeneID:3846		70936565
8970	cg09022808	0.639168	-119.741	119.741	1.06138e-12	-0.0401877	6128.72	149	0.196522	0.679355	0	1	6121.19	149	0.123905	GAL3ST1	22	CST;	NM_004861.1	GeneID:9514		29290857
13194	cg13274254	0.101842	119.686	119.686	1.07495e-12	0.0246512	10946.4	149	0.110224	0.0771912	0	1	11091.8	149	0.0676802	GULP1	2	CED6; GULP; CED-6;	NM_016315.2	GeneID:51454	2:188864480-188866161	188865811
1750	cg01726767	0.666609	-119.668	119.668	1.07942e-12	-0.0388049	6807.71	149	0.205788	0.705414	0	1	6680.98	149	0.131641	LALBA	12		NM_002289.2	GeneID:3906		47251390
11433	cg11494699	0.751887	-119.513	119.513	1.11877e-12	-0.0333659	9256.82	149	0.14349	0.785253	0	1	9174.5	149	0.087159	RAG1	11	RNF74; MGC43321;	NM_000448.1	GeneID:5896		36544793
6577	cg06589885	0.882442	-119.465	119.465	1.13102e-12	-0.0217597	14374.3	149	0.105874	0.904202	0	1	14531.8	149	0.066114	HFE2	1	JH; HJV; RGMC; HFE2A; MGC23953;	NM_145277.3	GeneID:148738		144124550
8812	cg08849574	0.123946	119.369	119.369	1.15648e-12	0.0267157	9467.54	149	0.1211	0.0972299	0	1	9515.91	149	0.0695922	ZNF134	19	pHZ-15;	NM_003435.2	GeneID:7693	19:62817155-62817951	62817765
3002	cg02992596	0.70659	-119.347	119.347	1.16236e-12	-0.0364342	20668.6	149	0.155052	0.743024	0	1	20658.8	149	0.111597	MGC27016	4		NM_144979.2	GeneID:166863	4:155921599-155922908	155921670
14460	cg14458615	0.716507	-119.033	119.033	1.24928e-12	-0.0357555	2467.97	149	0.115872	0.752263	0	1	2498.39	149	0.0780532	IGSF11	3	VSIG3; Igsf13; BT-IgSF; CXADRL1; MGC35227;	NM_152538.2	GeneID:152404	3:120347421-120347771	120347642
4410	cg04384208	0.704537	-119.021	119.021	1.25285e-12	-0.0365157	11661.2	149	0.19982	0.741052	0	1	11782	149	0.128402	FCGR3A	1	CD16; FCG3; CD16a; FCGR3; IGFR3;	NM_000569.6	GeneID:2214		159786020
7904	cg07940804	0.626312	-119.01	119.01	1.25597e-12	-0.0406452	5124.57	149	0.172389	0.666957	0	1	5036.76	149	0.108747	ACTRT1	X	AIP1; ARIP1; HSD27; ARP-T1; KIAA0705; MGC26590; RP1-203C2.1;	NM_138289.1	GeneID:139741		127013583
26352	cg26368842	0.834407	-118.944	118.944	1.27523e-12	-0.0264302	15664.7	149	0.120137	0.860838	0	1	15683	149	0.0771103	PIP5K2A	10	PIPK; PIP5KII-alpha;	NM_005028.3	GeneID:5305	10:23041989-23044176	23044026
15622	cg15606663	0.602484	-118.912	118.912	1.28472e-12	-0.0415894	3472.93	149	0.171313	0.644073	0	1	3413.68	149	0.10955	KRTAP15-1	21	KAP15.1;	NM_181623.1	GeneID:254950		30734474
26739	cg26776077	0.858368	-118.828	118.828	1.30969e-12	-0.0241325	25963.3	149	0.109897	0.8825	0	1	25496.8	149	0.0715772	FLJ45202	9		NM_207507.1	GeneID:401508		65233711
19966	cg19979773	0.859631	-118.813	118.813	1.31444e-12	-0.0240066	10394.1	149	0.0929016	0.883638	0	1	10615.7	149	0.064174	FCN3	1	FCNH; HAKA1; MGC22543;	NM_003665.2	GeneID:8547	1:27575069-27575281	27575238
13601	cg13663218	0.180907	118.702	118.702	1.34843e-12	0.0315091	22348.4	149	0.134244	0.149398	0	1	22415.8	149	0.0841199	TRHDE	12	PAP-II; PGPEP2; TRH-DE;	NM_013381.1	GeneID:29953	12:70951587-70954434	70953243
10771	cg10876928	0.627401	-118.638	118.638	1.36848e-12	-0.0405352	12149.4	149	0.182909	0.667937	0	1	12002.9	149	0.115923	SDC4	20	SYND4; MGC22217;	NM_002999.2	GeneID:6385		43410887
27110	cg27168844	0.651437	-118.597	118.597	1.38147e-12	-0.0394126	2213.39	149	0.1763	0.690849	0	1	2216.68	149	0.118339	IL17	6	CTLA8; IL-17; IL-17A;	NM_002190.2	GeneID:3605		52159276
9253	cg09307264	0.596733	-118.568	118.568	1.39059e-12	-0.0417402	19232	149	0.181107	0.638473	0	1	19845.5	149	0.114741	INCA1	17	HSD45;	NM_213726.1	GeneID:388324		4843005
18671	cg18669588	0.747134	-118.482	118.482	1.41847e-12	-0.0335724	10262.9	149	0.140433	0.780706	0	1	10271.4	149	0.0868595	PTK9L	3	A6r; A6RP; MSTP011;	NM_007284.3	GeneID:11344	3:52248845-52249135	52249091
10252	cg10322876	0.797103	-118.48	118.48	1.41902e-12	-0.0296704	10123.2	149	0.135819	0.826773	0	1	10064.6	149	0.0840944	CYP2B6	19	CPB6; IIB1; P450; CYP2B; CYPIIB6;	NM_000767.4	GeneID:1555		46188589
22937	cg22975712	0.873859	-118.421	118.421	1.4385e-12	-0.0225478	17545.7	149	0.108681	0.896407	0	1	17518.2	149	0.0714547	GALR3	22		NM_003614.1	GeneID:8484		36548891
9009	cg09068492	0.165415	118.416	118.416	1.44022e-12	0.0302246	10879.2	149	0.128808	0.13519	0	1	10806.5	149	0.0800031	CALCA	11	CT; KC; CGRP; CALC1; CGRP1; CGRP-I; MGC126648;	NM_001741.2	GeneID:796	11:14949913-14950639	14950234
19660	cg19682367	0.622972	-118.396	118.396	1.44674e-12	-0.0406826	1930.02	149	0.157366	0.663655	0	1	1866.27	149	0.10425	FAM79B	3	FLJ41238; FLJ43694; MGC126599; MGC126601;	NM_198485.1	GeneID:285386		190371180
9078	cg09137696	0.118205	118.36	118.36	1.45875e-12	0.0260748	15436.8	149	0.119893	0.0921301	0	1	15352.8	149	0.0760625	MT1A	16	MT1; MTC; MT1S; MGC32848;	NM_005946.2	GeneID:4489	16:55229309-55230226	55229916
2969	cg02962602	0.49737	-118.332	118.332	1.46825e-12	-0.0440218	18276.8	149	0.162043	0.541392	0	1	18721.4	149	0.111434	CCDC57	17	FLJ00130; MGC102869;	NM_198082.1	GeneID:284001	17:77763208-77764767	77764702
10220	cg10296238	0.429982	118.306	118.306	1.4772e-12	0.0436058	4990	149	0.202796	0.386376	0	1	4943.31	149	0.191027	C21orf56	21	MGC99490; DKFZp434N0650;	NM_032261.3	GeneID:84221	21:46429326-46429616	46429602
20356	cg20385229	0.69488	-118.245	118.245	1.49786e-12	-0.0369845	5796.42	149	0.18659	0.731865	0	1	5868.61	149	0.117039	ALKBH	14	ABH; alkB; hABH;	NM_006020.1	GeneID:8846		77245223
19923	cg19937039	0.656267	-118.227	118.227	1.50432e-12	-0.0391086	5370.37	149	0.185521	0.695376	0	1	5476.18	149	0.115661	SERPINA10	14	PZI; ZPI;	NM_016186.1	GeneID:51156		93829520
7679	cg07705908	0.746217	-118.225	118.225	1.50477e-12	-0.0336003	14402.5	149	0.1575	0.779817	0	1	14391.4	149	0.0993411	SPDEF	6	PDEF; bA375E1.3; RP11-375E1__A.3;	NM_012391.1	GeneID:25803		34631903
21942	cg21969640	0.352561	118.184	118.184	1.51915e-12	0.0414326	23375.8	149	0.175229	0.311128	0	1	23889	149	0.126498	GPR84	12	EX33; GPCR4;	NM_020370.1	GeneID:53831		53043844
18960	cg18967533	0.732222	-118.099	118.099	1.54903e-12	-0.0345659	13410.3	149	0.151136	0.766788	0	1	13421.4	149	0.0956386	KLK6	19	hK6; Bssp; Klk7; SP59; ZYME; PRSS9; PRSS18; MGC9355; NEUROSIN;	NM_002774.3	GeneID:5653		56164537
14690	cg14694011	0.759673	-118.097	118.097	1.54971e-12	-0.0325938	6272.28	149	0.141887	0.792267	0	1	6174.47	149	0.0886738	CYP19A1	15	ARO; ARO1; CPV1; CYAR; CYP19; MGC104309; P-450AROM;	NM_000103.2	GeneID:1588		49418316
26918	cg26960719	0.65095	-118.037	118.037	1.57141e-12	-0.0393411	2141.79	149	0.176868	0.690291	0	1	2148.95	149	0.111333	KCNJ16	17	KIR5.1; MGC33717;	NM_170741.1	GeneID:3773		65582897
12333	cg12417466	0.621566	-117.933	117.933	1.60961e-12	-0.0406613	4282.93	149	0.173211	0.662227	0	1	4255.79	149	0.112018	ARPP-21	3		NM_198399.1	GeneID:10777		35658823
14440	cg14448104	0.805321	-117.93	117.93	1.61046e-12	-0.0289056	7785.43	149	0.120049	0.834226	0	1	7838.55	149	0.0803938	MATN4	20	HE6WCR54;	NM_003833.2	GeneID:8785	20:43366148-43367134	43366970
1725	cg01703884	0.763996	-117.852	117.852	1.63995e-12	-0.0322346	5383.53	149	0.165941	0.796231	0	1	5316.25	149	0.106468	FLJ37587	12		NM_173597.1	GeneID:283446	12:108362343-108362608	108362557
24221	cg24276445	0.83849	-117.798	117.798	1.6602e-12	-0.0259261	9932.65	149	0.100243	0.864416	0	1	9954.7	149	0.0595334	CNR1	6	CB1; CNR; CB-R; CB1A; CANN6; CB1K5;	NM_016083.3	GeneID:1268		88911672
4794	cg04740359	0.678016	-117.756	117.756	1.67641e-12	-0.0378792	3974.46	149	0.19516	0.715896	0	1	3957.07	149	0.12466	NTF3	12	NT3; HDNF; NGF2; NGF-2; MGC129711;	NM_002527.3	GeneID:4908	12:5473723-5474332	5473803
6200	cg06236276	0.698688	-117.737	117.737	1.68376e-12	-0.0366761	29475.5	149	0.13467	0.735364	0	1	29621.6	149	0.0805456	SLC22A2	6	OCT2; MGC32628;	NM_003058.2	GeneID:6582	6:160600019-160600273	160600068
13606	cg13668129	0.226142	117.648	117.648	1.71854e-12	0.0346784	14647.3	149	0.143295	0.191464	0	1	14791.5	149	0.0880027	HNRPUL1	19	E1BAP5; E1B-AP5; FLJ12944;	NM_144732.1	GeneID:11100	19:46459893-46463152	46459915
5736	cg05740244	0.716898	117.574	117.574	1.74812e-12	0.037789	4211.83	149	0.18517	0.679109	0	1	4324.81	149	0.20174	LDHC	11	LDH3; LDHX; MGC111073;	NM_017448.1	GeneID:3948	11:18389965-18390649	18390591
2835	cg02833180	0.748758	-117.329	117.329	1.84961e-12	-0.0332943	3637.99	149	0.157922	0.782052	0	1	3666.47	149	0.108292	PLCL1	2	PLCE; PLCL; PLC-L; PLDL1; MGC126580;	NM_006226.1	GeneID:5334		198523309
26832	cg26851800	0.669209	-117.316	117.316	1.85507e-12	-0.0382902	2100.73	149	0.170357	0.7075	0	1	2117.73	149	0.119011	SPINK5L2	5		NM_001001325.1	GeneID:408187		147529019
8338	cg08390254	0.710465	-117.248	117.248	1.88456e-12	-0.0358755	4850.54	149	0.187214	0.74634	0	1	4774.47	149	0.123334	ATP1A2	1	FHM2; MHP2; MGC59864;	NM_000702.2	GeneID:477		158351403
15865	cg15802898	0.0995869	117.208	117.208	1.902e-12	0.0241853	18437	149	0.115709	0.0754016	0	1	18205.9	149	0.0729613	FOXE1	9	TTF2; FOXE2; HFKH4; HFKL5; TITF2; TTF-2; FKHL15;	NM_004473.3	GeneID:2304	9:99653657-99657482	99655022
7001	cg07015629	0.0765483	117.188	117.188	1.91073e-12	0.0218902	24736.4	149	0.0999242	0.0546581	0	1	24701.4	149	0.0610856	ERBB4	2	HER4; MGC138404;	NM_005235.1	GeneID:2066	2:213109348-213112340	213111457
9918	cg10000775	0.121592	117.112	117.112	1.94451e-12	0.0262526	9677.99	149	0.107787	0.0953389	0	1	9527.37	149	0.064914	PDLIM3	4	ALP;	NM_014476.1	GeneID:27295	4:186692804-186694021	186693550
19241	cg19241311	0.648575	-117.112	117.112	1.94451e-12	-0.0393049	18142.8	149	0.156393	0.68788	0	1	17674.5	149	0.107064	DEFB123	20	DEFB-23; ESC42-RELD;	NM_153324.2	GeneID:245936		29492554
23114	cg23143093	0.774422	-117.038	117.038	1.9777e-12	-0.0313247	4892.83	149	0.153178	0.805746	0	1	4939.7	149	0.106878	NEK10	3	FLJ32685;	NM_152534.2	GeneID:152110		27308028
17018	cg16986846	0.64681	-117.017	117.017	1.9876e-12	-0.0393738	9919.82	149	0.19589	0.686184	0	1	10136.5	149	0.125554	SCGB2A1	11	LPHC; MGB2; UGB3; MGC71973;	NM_002407.1	GeneID:4246		61732750
18853	cg18870231	0.737205	-116.992	116.992	1.9989e-12	-0.0340638	5811.93	149	0.152753	0.771269	0	1	5764.63	149	0.0948886	C1orf87	1	FLJ44073; MGC34837;	NM_152377.1	GeneID:127795		60311723
23101	cg23131777	0.700947	-116.972	116.972	2.00812e-12	-0.0364224	16131.1	149	0.142013	0.737369	0	1	16362.6	149	0.0971719	ADAM30	1	svph4;	NM_021794.2	GeneID:11085	1:120240390-120240877	120240448
2992	cg02982734	0.748602	-116.932	116.932	2.02656e-12	-0.0332486	12373	149	0.135781	0.781851	0	1	12448.2	149	0.0831255	MAGEL2	15	nM15; NDNL1;	NM_019066.2	GeneID:54551	15:21442139-21442830	21442141
14956	cg14948822	0.731176	-116.885	116.885	2.04866e-12	-0.0344621	4106.44	149	0.149655	0.765638	0	1	4103.26	149	0.101359	MPV17	2		NM_002437.3	GeneID:4358		27398510
19358	cg19368582	0.725382	-116.736	116.736	2.12056e-12	-0.0348309	12886.5	149	0.161868	0.760213	0	1	12849.1	149	0.102366	MMRN2	10	EMILIN3; FLJ13465; ENDOGLYX1; EndoGlyx-1;	NM_024756.1	GeneID:79812		88706626
26821	cg26845300	0.104509	116.706	116.706	2.13481e-12	0.0246085	23098.2	149	0.0987237	0.0799009	0	1	22810.7	149	0.063739	SNX9	6	SDP1; WISP; MST155; SH3PX1; MSTP155; SH3PXD3A;	NM_016224.3	GeneID:51429	6:158163446-158165173	158163821
2134	cg02110963	0.81767	-116.502	116.502	2.23764e-12	-0.0276685	4653.28	149	0.135096	0.845338	0	1	4756.48	149	0.0865715	MGC40222	6		NM_152738.1	GeneID:221718		10542961
23295	cg23322523	0.644154	-116.498	116.498	2.2398e-12	-0.0394142	2812.42	149	0.185269	0.683569	0	1	2757.43	149	0.119825	TRIM55	8	RNF29; MURF-2;	NM_033058.2	GeneID:84675		67201595
8448	cg08504583	0.648247	116.436	116.436	2.27211e-12	0.0409758	8706.66	149	0.124988	0.607271	0	1	8723.72	149	0.109035	FLJ30046	13		NM_144595.2	GeneID:122060		77213585
23500	cg23540651	0.786823	-116.419	116.419	2.28097e-12	-0.0302599	4393.47	149	0.123248	0.817083	0	1	4408.11	149	0.0795534	GBP3	1	FLJ10961;	NM_018284.1	GeneID:2635		89262622
8526	cg08583049	0.0535899	116.366	116.366	2.30903e-12	0.0194203	22304.3	149	0.093429	0.0341696	0	1	23326.9	149	0.0585651	FOXB1	15	FKH5; HFKH-5;	NM_012182.1	GeneID:27023	15:58083184-58086207	58084107
14458	cg14456683	0.186863	116.35	116.35	2.31729e-12	0.0316613	6322.92	149	0.133685	0.155202	0	1	6442.37	149	0.0806188	ZIC1	3	ZIC; ZNF201;	NM_003412.3	GeneID:7545	3:148609249-148612068	148609700
9782	cg09868882	0.63631	-116.345	116.345	2.32012e-12	-0.0397491	3168.04	149	0.175895	0.67606	0	1	3103.81	149	0.112173	GRM8	7	GLUR8; mGlu8; GPRC1H; MGLUR8; MGC126724;	NM_000845.1	GeneID:2918		126670876
4121	cg04063348	0.687516	-116.34	116.34	2.32252e-12	-0.0371188	2748.14	149	0.164796	0.724635	0	1	2772.53	149	0.111114	IL17F	6	ML1; ML-1; IL-17F;	NM_052872.3	GeneID:112744		52217306
26977	cg27022827	0.646204	-116.265	116.265	2.36309e-12	-0.0392767	36374.5	149	0.192023	0.685481	0	1	36714.5	149	0.129927	TJP3	19	ZO-3; MGC119546;	NM_014428.1	GeneID:27134	19:3679609-3680010	3679751
27274	cg27336379	0.795464	-116.168	116.168	2.41663e-12	-0.0295216	8445.26	149	0.127451	0.824986	0	1	8568.22	149	0.079949	SLC44A5	1	CTL5; FLJ34081; MGC34032;	NM_152697.2	GeneID:204962		75850818
16196	cg16122592	0.72095	-116.151	116.151	2.42594e-12	-0.0350367	5065.01	149	0.153614	0.755987	0	1	4974.82	149	0.0986758	MAGEB6	X	MAGE-B6; MAGEB6A; FLJ40242;	NM_173523.2	GeneID:158809		26120633
5512	cg05500074	0.824413	-116.026	116.026	2.49666e-12	-0.0270161	32447.2	149	0.132753	0.851429	0	1	31876	149	0.0890257	TSKS	19	TSKS1;	NM_021733.1	GeneID:60385		54958148
2927	cg02921257	0.722903	-115.998	115.998	2.51299e-12	-0.0348865	11879	149	0.158266	0.757789	0	1	11808.1	149	0.106324	CMYA1	3	Xin; DKFZp451D042; DKFZp779C1947;	NM_194293.2	GeneID:165904		39208862
20695	cg20748065	0.379611	115.962	115.962	2.53425e-12	0.0419556	17963	149	0.174104	0.337655	0	1	18270.2	149	0.126858	POR	7	CYPOR; DKFZp686G04235;	NM_000941.1	GeneID:5447	7:75421205-75421476	75421357
16151	cg16069910	0.777251	-115.949	115.949	2.54138e-12	-0.0309604	14142	149	0.149061	0.808212	0	1	13887	149	0.0983059	TXNL6	19	RDCVF;	NM_138454.1	GeneID:115861	19:17432468-17432768	17432528
23328	cg23350580	0.810458	-115.874	115.874	2.58613e-12	-0.0282209	35667	149	0.136265	0.838679	0	1	35356.8	149	0.08932	TBC1D3C	17	MGC44903;	NM_001001418.2	GeneID:414060		31616188
14038	cg14074117	0.605062	-115.843	115.843	2.60429e-12	-0.0409535	8445.4	149	0.16355	0.646016	0	1	8269.84	149	0.109782	MGC35212	16	gs129;	NM_152764.1	GeneID:254528		1849715
9357	cg09426307	0.643059	-115.761	115.761	2.65412e-12	-0.0393406	20769.2	149	0.165708	0.6824	0	1	21369.9	149	0.100096	SEC14L3	22	TAP2; MGC119366; MGC119367; MGC119368;	NM_174975.3	GeneID:266629		29198048
22230	cg22253945	0.803172	-115.61	115.61	2.74796e-12	-0.0288104	31405.4	149	0.142539	0.831983	0	1	31173.5	149	0.092269	GPR45	2	PSP24; PSP24A; PSP24(ALPHA);	NM_007227.3	GeneID:11250	2:105224891-105225678	105224921
14216	cg14238120	0.66948	-115.581	115.581	2.76643e-12	-0.0379949	16792.3	149	0.166368	0.707474	0	1	16697.8	149	0.102985	ELA3A	1	ELA3;	NM_005747.3	GeneID:10136		22200613
18969	cg18979491	0.654442	-115.428	115.428	2.86523e-12	-0.0387403	5364.5	149	0.200524	0.693182	0	1	5293.3	149	0.126807	LBP	20	MGC22233;	NM_004139.2	GeneID:3929		36407859
15073	cg15075718	0.732807	-115.307	115.307	2.94659e-12	-0.0341255	21078	149	0.175499	0.766933	0	1	21399.7	149	0.112481	MFRP	11	NNO2; FLJ30570;	NM_031433.1	GeneID:83552		118722386
25413	cg25425005	0.873544	-115.303	115.303	2.9491e-12	-0.0222905	26855	149	0.0968677	0.895835	0	1	26263.6	149	0.0658824	HBZ	16		NM_005332.2	GeneID:3050		142905
7830	cg07873128	0.856899	-115.27	115.27	2.97187e-12	-0.0239215	12271.6	149	0.121531	0.88082	0	1	12135.8	149	0.0778603	OSBPL5	11	ORP5; OBPH1;	NT_009237.17	GeneID:114879	11:3077516-3078062	3077976
1886	cg01868128	0.675235	-115.223	115.223	3.00428e-12	-0.0376288	5803.47	149	0.153632	0.712864	0	1	5811.14	149	0.0974745	LCE5A	1	LEP18; SPRL5A;	NM_178438.3	GeneID:254910		150750299
8322	cg08370996	0.102467	115.223	115.223	3.00428e-12	0.0242623	25165.6	149	0.10606	0.0782051	0	1	24898.4	149	0.0649474	NR2F2	15	ARP1; SVP40; COUPTFB; TFCOUP2; COUP-TFII;	NM_021005.2	GeneID:7026	15:94674239-94677008	94675035
12544	cg12604192	0.688463	-115.22	115.22	3.00587e-12	-0.0368892	3436.54	149	0.194123	0.725352	0	1	3359.7	149	0.122712	KCNA10	1	Kcn1; Kv1.8;	NM_005549.2	GeneID:3744		110863650
10059	cg10143146	0.293294	115.172	115.172	3.03934e-12	0.0382941	8894.05	149	0.208331	0.255	0	1	9084.38	149	0.174232	COL11A2	6	HKE5; PARP; STL3; DFNA13; DFNB53;	NM_080679.1	GeneID:1302	6:33268548-33269470	33269355
3601	cg03573747	0.811786	-115.157	115.157	3.04972e-12	-0.0280222	7889.09	149	0.135265	0.839808	0	1	7951.83	149	0.0901858	ADIPOQ	3	ACDC; APM1; APM-1; GBP28; ACRP30; adiponectin;	NM_004797.2	GeneID:9370		188043311
10113	cg10190509	0.778817	-115.056	115.056	3.12205e-12	-0.030722	5600.75	149	0.128795	0.809539	0	1	5661.38	149	0.0825684	CCL16	17	LEC; LMC; NCC4; CKb12; HCC-4; LCC-1; Mtn-1; NCC-4; SCYL4; ILINCK; SCYA16; MGC117051;	NM_004590.2	GeneID:6360		31332250
25909	cg25934198	0.830138	-114.933	114.933	3.21122e-12	-0.0263805	8793.79	149	0.102514	0.856518	0	1	8936.59	149	0.0617707	FLJ36268	9		NM_207511.1	GeneID:401563		139040602
12171	cg12240237	0.655444	-114.878	114.878	3.25237e-12	-0.0385991	4776.4	149	0.15875	0.694043	0	1	4703.85	149	0.10203	WBSCR23	7	FLJ22367;	NM_025042.2	GeneID:80112		73584338
5012	cg04968473	0.643167	-114.816	114.816	3.29921e-12	-0.039178	4277.61	149	0.192456	0.682345	0	1	4228.06	149	0.119334	CYP1A2	15	CP12; P3-450; P450(PA);	NM_000761.3	GeneID:1544		72827787
10376	cg10466917	0.655086	-114.737	114.737	3.35993e-12	-0.0385938	3235.16	149	0.182641	0.69368	0	1	3347.27	149	0.119016	TRY1	7	TRYX3; UNQ2540; FLJ16649; MGC35022;	NM_001001317.1	GeneID:136541		141604926
14703	cg14701962	0.799636	-114.729	114.729	3.36558e-12	-0.0289991	10843	149	0.141595	0.828635	0	1	11162.8	149	0.0859185	C1orf111	1	HSD20; RP11-565P22.3;	NM_182581.1	GeneID:284680		160614634
25925	cg25946374	0.839981	-114.727	114.727	3.36744e-12	-0.0254598	26595.1	149	0.116072	0.865441	0	1	26669.6	149	0.0730967	IL22RA1	1	IL22R; CRF2-9;	NM_021258.2	GeneID:58985		24342378
15626	cg15610233	0.702651	-114.697	114.697	3.39078e-12	-0.0359701	3122.7	149	0.168891	0.738621	0	1	3256.66	149	0.125504	ADAM7	8	EAPI; GP-83;	NM_003817.1	GeneID:8756		24353819
4628	cg04576021	0.580726	-114.649	114.649	3.42863e-12	-0.0415782	3570.42	149	0.175449	0.622304	0	1	3485.2	149	0.116047	HLA-DOB	6	DOB;	NM_002120.2	GeneID:3112		32892233
14305	cg14321743	0.761161	-114.626	114.626	3.44683e-12	-0.0320125	9504.46	149	0.14295	0.793174	0	1	9530.3	149	0.0926083	PLA2G2D	1	SPLASH; sPLA2S;	NM_012400.2	GeneID:26279		20318249
26706	cg26750747	0.834279	-114.616	114.616	3.45446e-12	-0.0259695	9047.26	149	0.130373	0.860248	0	1	9057.89	149	0.0804035	FOLR1	11	FBP; FOLR; MOv18; FR-alpha;	NM_000802.2	GeneID:2348		71577614
27196	cg27257987	0.669203	-114.613	114.613	3.45669e-12	-0.0378507	4141.2	149	0.188107	0.707053	0	1	4204.72	149	0.116532	PSG4	19	PSG9;	NM_002780.3	GeneID:5672		48401200
10993	cg11068096	0.784255	-114.577	114.577	3.48602e-12	-0.0302292	16995.9	149	0.129343	0.814484	0	1	16714.5	149	0.0856939	KRT14	17	K14; CK14; EBS3; EBS4;	NM_000526.3	GeneID:3861		36996149
9348	cg09422355	0.769919	-114.463	114.463	3.57874e-12	-0.0313313	21516.2	149	0.12507	0.80125	0	1	21471.5	149	0.0834104	CABP5	19		NM_019855.3	GeneID:56344		53238970
4650	cg04595021	0.823277	-114.454	114.454	3.5855e-12	-0.0269375	3846.13	149	0.132849	0.850214	0	1	4040.63	149	0.0891533	C21orf86	21		NM_153454.1	GeneID:257103		45541263
10306	cg10379687	0.60921	-114.44	114.44	3.59741e-12	-0.0405489	3523.4	149	0.18034	0.649759	0	1	3374.66	149	0.118022	SPINLW1	20	WAP7; EPPIN; WFDC7; EPPIN1; EPPIN2; EPPIN3; dJ461P17.2;	NM_181502.1	GeneID:57119		43609371
27280	cg27344326	0.76703	-114.372	114.372	3.65435e-12	-0.0315377	15694.2	149	0.135461	0.798568	0	1	15666.8	149	0.0867399	DMRTC1	X		NM_033053.1	GeneID:63947	X:72014516-72014901	72014529
23427	cg23464269	0.695804	-114.323	114.323	3.69556e-12	-0.0363199	11087.5	149	0.180622	0.732123	0	1	11204.2	149	0.114097	UGT1A3	2	UGT1C; UGT1*3;	NM_019093.2	GeneID:54659		234302406
4316	cg04289385	0.09279	114.286	114.286	3.72718e-12	0.0232344	18540.7	149	0.111683	0.0695556	0	1	18596.2	149	0.0705435	ETV7	6	TEL2; TELB; TEL-2;	NM_016135.2	GeneID:51513	6:36462816-36464072	36463803
3030	cg03014957	0.624053	-114.278	114.278	3.73396e-12	-0.0399264	5284.68	149	0.148451	0.663979	0	1	5228.75	149	0.103474	DEFB118	20	ESC42; DEFB-18; C20orf63; dJ1018D12.3;	NM_054112.1	GeneID:117285		29419723
26167	cg26185508	0.705621	-114.236	114.236	3.77051e-12	-0.0357162	4014.65	149	0.149393	0.741337	0	1	3978.57	149	0.0922424	CDCP2	1		NM_201546.2	GeneID:200008	1:54391846-54392065	54392033
17363	cg17342759	0.704999	-114.183	114.183	3.81698e-12	-0.035746	4778.04	149	0.199341	0.740745	0	1	4876.53	149	0.132118	PPP2R2B	5	SCA12; MGC24888; PR55-BETA; PP2A-PR55B; PR2AB-BETA; PR2AB55-BETA; PR2APR55-BETA;	NM_181674.1	GeneID:5521		146442048
22861	cg22899145	0.902343	-114.164	114.164	3.83389e-12	-0.0192221	15884.2	149	0.100122	0.921565	0	1	15639.4	149	0.066696	OPN1LW	X	CBP; RCP; CBBM;	NM_020061.2	GeneID:5956		153063378
18782	cg18780284	0.674373	-114.121	114.121	3.87177e-12	-0.0374941	8057.85	149	0.203714	0.711867	0	1	8008.55	149	0.127261	SPRR1B	1	SPRR1; GADD33; CORNIFIN; MGC61901;	NM_003125.1	GeneID:6699		151270946
3899	cg03860890	0.123706	113.929	113.929	4.0465e-12	0.0260947	17600	149	0.124592	0.0976113	0	1	17475.3	149	0.0820046	EGFR	7	ERBB; mENA; ERBB1;	NM_201282.1	GeneID:1956	7:55053462-55055739	55053782
4649	cg04592706	0.789906	-113.819	113.819	4.15088e-12	-0.0296805	3733.5	149	0.125054	0.819587	0	1	3768.54	149	0.0888843	ABCA4	1	FFM; RMP; ABCR; RP19; STGD; ABC10; CORD3; STGD1; DKFZp781N1972;	NM_000350.1	GeneID:24		94359180
19221	cg19224837	0.0563509	113.746	113.746	4.22066e-12	0.019499	14008.9	149	0.0796228	0.0368519	0	1	14303.3	149	0.0481146	GSC	14		NM_173849.2	GeneID:145258	14:94304190-94306783	94306368
21378	cg21402035	0.819061	-113.74	113.74	4.2262e-12	-0.0272256	29478.5	149	0.14643	0.846286	0	1	28989.3	149	0.0936114	GALR3	22		NM_003614.1	GeneID:8484		36549346
456	cg00436603	0.716861	-113.608	113.608	4.35763e-12	-0.0349209	12323.2	149	0.191799	0.751782	0	1	12456.2	149	0.114852	CYP2E1	10	CPE1; CYP2E; P450-J; P450C2E;	NM_000773.3	GeneID:1571		135190730
19464	cg19464252	0.735598	-113.416	113.416	4.55376e-12	-0.0336611	19727.7	149	0.155796	0.769259	0	1	19777.2	149	0.0997304	FBS1	16	FBS; FLJ11618;	NM_022452.1	GeneID:64319		30582734
1163	cg01145396	0.656292	-113.23	113.23	4.75324e-12	-0.0382848	8098.45	149	0.185665	0.694577	0	1	8064.05	149	0.11679	CHRNG	2	ACHRG;	NM_005199.4	GeneID:1146		233111307
10388	cg10479672	0.597854	-113.228	113.228	4.75521e-12	-0.0407551	8071.8	149	0.188187	0.638609	0	1	8076.83	149	0.123066	IL1F8	2	FIL1; FIL1H; IL1H2; IL-1F8; IL-1H2; IL1-ETA; MGC126880; MGC126882; FIL1-(ETA);	NM_014438.3	GeneID:27177		113527112
10418	cg10500909	0.62651	-113.168	113.168	4.82159e-12	-0.0396354	4503.6	149	0.169258	0.666146	0	1	4466.23	149	0.109828	CYP11B2	8	CPN2; ALDOS; CYP11B; CYP11BL; P450C18; P-450C18; P450aldo;	NM_000498.2	GeneID:1585		143997017
13048	cg13133883	0.482114	-113.167	113.167	4.82292e-12	-0.0431748	16677.2	149	0.152467	0.525289	0	1	17066.6	149	0.100891	RGR	10		NM_002921.3	GeneID:5995		85994640
19042	cg19042947	0.614856	-113.097	113.097	4.90117e-12	-0.0400971	17598.3	149	0.183165	0.654953	0	1	17911.1	149	0.114495	SERPINA4	14	KAL; KST; PI4; KLST; kallistatin;	NM_006215.2	GeneID:5267		94097194
22173	cg22194129	0.710516	-113.097	113.097	4.90117e-12	-0.0352434	20396	149	0.155576	0.74576	0	1	20573.1	149	0.102336	CLEC4C	12	DLEC; HECL; BDCA2; CD303; CLECSF7; CLECSF11; PRO34150; MGC125791; MGC125792; MGC125793;	NM_130441.2	GeneID:170482		7792928
15795	cg15756091	0.818029	-113.026	113.026	4.98207e-12	-0.0272337	9269.22	149	0.116748	0.845263	0	1	9296.45	149	0.0750698	RGSL2	1	DKFZp434E169;	NM_032267.1	GeneID:84227		180686278
21760	cg21765730	0.691693	-112.773	112.773	5.2802e-12	-0.0363203	3113.76	149	0.179313	0.728013	0	1	3100.99	149	0.114296	NOX3	6	GP91-3;	NM_015718.1	GeneID:50508		155818867
25837	cg25856811	0.647238	-112.687	112.687	5.38629e-12	-0.0386305	9293.99	149	0.198956	0.685869	0	1	9473.41	149	0.125904	SPRR3	1		NM_005416.1	GeneID:6707		151240581
3220	cg03190825	0.617623	-112.595	112.595	5.50225e-12	-0.0399021	18742.5	149	0.161966	0.657525	0	1	19069.7	149	0.121019	CYP4F11	19		NM_021187.2	GeneID:57834		15906788
4052	cg04001802	0.641053	-112.571	112.571	5.53235e-12	-0.038897	2492.16	149	0.188871	0.67995	0	1	2374.56	149	0.124504	THEDC1	10	FLJ11106; MGC51852;	NM_018324.1	GeneID:55301		15125285
24184	cg24240626	0.642299	-112.375	112.375	5.78749e-12	-0.0388083	4159.82	149	0.181058	0.681107	0	1	4178.31	149	0.116207	REG3A	2	HIP; PAP; PAP1; REG3; INGAP; PAP-H; PBCGF; REG-III;	NM_138937.1	GeneID:5068		79240228
15417	cg15422147	0.8294	-112.337	112.337	5.83795e-12	-0.0261588	14843	149	0.131685	0.855559	0	1	14538.7	149	0.0821679	SERPINB5	18	PI5; maspin;	NM_002639.2	GeneID:5268		59295319
22608	cg22638542	0.827312	-112.178	112.178	6.05606e-12	-0.0263267	10704.2	149	0.108015	0.853638	0	1	10668.6	149	0.0675518	SEC22L3	3	SEC22C; MGC5373; MGC13261; DKFZp761F2321;	NM_032970.2	GeneID:9117		42599577
26547	cg26583078	0.786822	-112.066	112.066	6.21427e-12	-0.0297087	3563.49	149	0.145601	0.816531	0	1	3625.18	149	0.103714	SORBS2	4	ARGBP2; KIAA0777;	NM_021069.3	GeneID:8470		187114772
5468	cg05461276	0.81893	-112.034	112.034	6.25979e-12	-0.0270435	7915.02	149	0.114157	0.845974	0	1	7849.84	149	0.0722516	PDZD3	11	IKEPP; PDZK2; FLJ22756;	NM_024791.2	GeneID:79849		118559919
9548	cg09607232	0.78906	-111.774	111.774	6.64599e-12	-0.0294948	3883.34	149	0.135794	0.818555	0	1	3825.13	149	0.0924192	MAGEA9	X	MAGE9; MGC8421;	NM_005365.4	GeneID:4108		148670955
27374	cg27442349	0.767489	-111.773	111.773	6.64737e-12	-0.03116	15435.2	149	0.138866	0.798649	0	1	15143.1	149	0.0863872	NFKBIB	19	IKBB; TRIP9;	NM_002503.3	GeneID:4793		44081059
23510	cg23555120	0.164075	111.703	111.703	6.75647e-12	0.0292757	10852.9	149	0.126956	0.134799	0	1	10750.4	149	0.079104	NUAK1	12	ARK5; KIAA0537;	NM_014840.2	GeneID:9891	12:105056077-105058153	105057993
19802	cg19823847	0.656608	-111.629	111.629	6.87227e-12	-0.0380074	3019.99	149	0.177802	0.694616	0	1	3084.04	149	0.117478	PBOV1	6	UC28; UROC28; dJ171N11.2;	NM_021635.1	GeneID:59351		138581399
16707	cg16648841	0.66034	-111.532	111.532	7.027e-12	-0.0378072	3890.57	149	0.165199	0.698147	0	1	3893.79	149	0.104234	C8A	1		NM_000562.1	GeneID:731		57093273
15602	cg15589427	0.824104	-111.465	111.465	7.13707e-12	-0.0265291	18270	149	0.121852	0.850633	0	1	18260.4	149	0.0742473	MUC4	3	mucin 4; HSA276359;	NM_138298.1	GeneID:4585	3:197023584-197023914	197023792
26814	cg26838900	0.680431	-111.397	111.397	7.24853e-12	-0.0367367	16375.5	149	0.170076	0.717167	0	1	16421.4	149	0.108882	LRRC15	3	LIB;	NM_130830.2	GeneID:131578		195571421
8207	cg08256781	0.846622	-111.384	111.384	7.2711e-12	-0.0244948	7962.59	149	0.103163	0.871116	0	1	7772.26	149	0.0604215	ACSBG2	19	BGR; BRGL; PRTD-NY3; MGC111089; DKFZp434K1635;	NM_030924.2	GeneID:81616		6086510
8544	cg08603768	0.638779	-111.374	111.374	7.28853e-12	-0.0387989	4966.77	149	0.184033	0.677578	0	1	4806.76	149	0.113182	WNT8A	5	WNT8D;	NM_031933.1	GeneID:7478		137447943
26145	cg26159905	0.599666	-111.374	111.374	7.28853e-12	-0.040365	17852.2	149	0.17482	0.640031	0	1	18032	149	0.109423	ASB10	7		NM_080871.2	GeneID:136371		150515847
10240	cg10315334	0.636918	-111.361	111.361	7.30954e-12	-0.0388789	15740.7	149	0.193389	0.675797	0	1	16007.8	149	0.121625	CCL5	17	SISd; SCYA5; RANTES; TCP228; D17S136E; MGC17164;	NM_002985.2	GeneID:6352		31231445
18570	cg18564727	0.632621	-111.212	111.212	7.56572e-12	-0.039042	2506.8	149	0.174926	0.671663	0	1	2448.37	149	0.111631	PLP1	X	PLP; PMD; MMPL; SPG2; PLP/DM20;	NM_000533.3	GeneID:5354		102917634
17806	cg17784922	0.784354	-111.176	111.176	7.62816e-12	-0.0297892	6644.02	149	0.143334	0.814143	0	1	6715.77	149	0.0872586	KEL	7	ECE3; CD238;	NM_000420.2	GeneID:3792		142369547
21196	cg21230133	0.750424	-111.175	111.175	7.62869e-12	-0.0323175	9468.66	149	0.133908	0.782742	0	1	9171.06	149	0.0852191	KRTHA1	17	HA1; Ha-1; hHa1;	NM_002277.2	GeneID:3881	17:36807010-36807222	36807046
5803	cg05810550	0.748219	-111.129	111.129	7.7101e-12	-0.0324654	6025.19	149	0.172662	0.780684	0	1	5977.37	149	0.114284	DEFB106A	8	BD-6; DEFB-6; DEFB106; MGC118938; MGC118939; MGC118940; MGC118941;	NM_152251.2	GeneID:245909		7330861
7085	cg07084746	0.731159	-111.129	111.129	7.7101e-12	-0.0336285	3749.63	149	0.142793	0.764788	0	1	3611.68	149	0.0919871	C3orf27	3	GR6;	NM_007354.1	GeneID:23434		129777337
8111	cg08145625	0.123878	111.129	111.129	7.7101e-12	0.0258031	8977.93	149	0.119917	0.0980745	0	1	9319.42	149	0.070921	TRAM1L1	4	MGC26568;	NM_152402.1	GeneID:133022	4:118225823-118226399	118225853
20442	cg20488657	0.8899	-111.061	111.061	7.83195e-12	-0.020258	13964.8	149	0.0989972	0.910158	0	1	13927.3	149	0.063367	TFF3	21	ITF; TFI; HITF; hP1.B;	NM_003226.2	GeneID:7033		42609995
10293	cg10368842	0.613271	-110.932	110.932	8.06882e-12	-0.039783	4708.61	149	0.181785	0.653053	0	1	4499.94	149	0.116985	C10orf81	10	FLJ23537; bA211N11.2; RP11-211N11.2;	NM_024889.3	GeneID:79949		115501494
16656	cg16592658	0.579939	-110.855	110.855	8.21221e-12	-0.0409206	14244.3	149	0.181461	0.62086	0	1	14541.7	149	0.116663	EBI3	19		NM_005755.2	GeneID:10148		4180887
3722	cg03705396	0.147823	110.845	110.845	8.23247e-12	0.027837	23181.8	149	0.123012	0.119986	0	1	22804.5	149	0.078907	MAP6D1	3	FLJ12748;	NM_024871.1	GeneID:79929	3:185025099-185026684	185026374
23597	cg23645091	0.731569	-110.738	110.738	8.43762e-12	-0.0335445	7464.8	149	0.143181	0.765114	0	1	7421.06	149	0.0943541	KRT5	12	K5; CK5; DDD; EBS2; KRT5A;	NM_000424.2	GeneID:3852		51200676
2126	cg02100848	0.824906	-110.64	110.64	8.62959e-12	-0.0263635	28473.7	149	0.131051	0.85127	0	1	28588	149	0.0914759	C3orf32	3		NM_015931.1	GeneID:51066		8668859
7632	cg07664183	0.100479	110.521	110.521	8.86931e-12	0.0235976	10235	149	0.0934841	0.0768811	0	1	10252.3	149	0.0576297	FAM29A	9	RP11-296P7.3;	NM_017645.3	GeneID:54801	9:19092346-19094467	19093231
246	cg00226904	0.733355	-110.507	110.507	8.89877e-12	-0.0333925	3934.45	149	0.14803	0.766748	0	1	3913.69	149	0.101245	SERPINB5	18	PI5; maspin;	NT_025028.13	GeneID:5268	18:59308015-59308744	59308045
11217	cg11283860	0.416581	110.45	110.45	9.01571e-12	0.0418871	10847.4	149	0.174491	0.374694	0	1	10908.2	149	0.124625	SLC45A1	1		XM_089081.7	GeneID:50651	1:8195845-8196051	8195939
20506	cg20557104	0.134156	110.415	110.415	9.08887e-12	0.0266245	13446.1	149	0.122444	0.107531	0	1	13263.5	149	0.0780019	B3GALT7	19	B3GNT8; BGALT15; beta3Gn-T8;	NM_198540.2	GeneID:374907		46626153
18471	cg18462653	0.704982	-110.398	110.398	9.12515e-12	-0.0351705	9633.91	149	0.192582	0.740153	0	1	9648.06	149	0.123594	DEFB119	20	DEFB-19; DEFB-20; DEFB120; MGC71893; ESC42-RELA; ESC42-RELB;	NM_153289.2	GeneID:245932		29441837
17230	cg17191715	0.778897	-110.35	110.35	9.22529e-12	-0.030104	6404.53	149	0.134073	0.809001	0	1	6344.65	149	0.083807	CA1	8		NM_001738.1	GeneID:759		86478130
826	cg00806490	0.153143	110.24	110.24	9.46237e-12	0.0282045	22332.5	149	0.137553	0.124938	0	1	21829	149	0.0847407	CDH13	16	CDHH;	NM_001257.3	GeneID:1012	16:81217810-81219323	81218374
2578	cg02580606	0.780896	-110.141	110.141	9.68033e-12	-0.0299232	5733.68	149	0.123073	0.810819	0	1	5697.4	149	0.0806941	KRTHA3B	17	HA3II; Ha-3II; KRTHA3A; hHa3-II;	NM_002279.3	GeneID:3884		36780252
26361	cg26379475	0.675022	-110.131	110.131	9.70309e-12	-0.0368201	3516.14	149	0.177345	0.711843	0	1	3385.23	149	0.117549	SH2D1B	1	EAT2;	NM_053282.4	GeneID:117157		160648405
3934	cg03891191	0.713345	-110.077	110.077	9.82358e-12	-0.0346121	11205.8	149	0.176043	0.747958	0	1	11296.7	149	0.109294	PRAMEF2	1	FLJ43580; DJ845O24.3; RP5-845O24.1;	NM_023014.1	GeneID:65122		12839585
26621	cg26656452	0.773047	-110.031	110.031	9.92773e-12	-0.0305073	8178.03	149	0.129373	0.803554	0	1	8077.48	149	0.0868214	HABP2	10	FSAP; HABP; PHBP; HGFAL;	NM_004132.2	GeneID:3026		115303155
14725	cg14722162	0.755178	-110.031	110.031	9.92956e-12	-0.0318183	6002.77	149	0.157617	0.786997	0	1	5916.54	149	0.105104	C5orf20	5	DCNP1;	NM_130848.1	GeneID:140947		134811085
15076	cg15077070	0.724253	-109.941	109.941	1.01365e-11	-0.0339034	3534.91	149	0.15533	0.758156	0	1	3460.75	149	0.100743	IL1RL2	2	IL1RRP2; IL1R-rp2;	NM_003854.2	GeneID:8808		102169722
14005	cg14045072	0.708568	-109.879	109.879	1.02825e-11	-0.0348739	5956.29	149	0.165986	0.743442	0	1	5890.99	149	0.106501	GPR116	6	KPG_001; KIAA0758; DKFZp564O1923;	NM_015234.3	GeneID:221395		46992321
26332	cg26353877	0.846604	-109.787	109.787	1.05039e-11	-0.0243263	16278.9	149	0.109133	0.87093	0	1	16337.7	149	0.0652093	APCS	1	SAP; PTX2; MGC88159;	NM_001639.2	GeneID:325		157824510
8406	cg08458170	0.89073	-109.779	109.779	1.05218e-11	-0.0200619	12047.5	149	0.0835696	0.910792	0	1	12212.6	149	0.0548264	ZNF537	19	TSH3; KIAA1474;	NM_020856.1	GeneID:57616	19:36462141-36462441	36462316
16874	cg16826286	0.748535	-109.777	109.777	1.05274e-11	-0.0322511	18402.7	149	0.157743	0.780786	0	1	18425.8	149	0.0957439	LYZL6	17	LYC1; PRO1485; TKAL754; 1700023H08Rik;	NM_020426.1	GeneID:57151		31290403
7543	cg07572435	0.87923	-109.605	109.605	1.09514e-11	-0.0211985	13833.5	149	0.0922403	0.900428	0	1	13770	149	0.0554603	LY6D	8	E48;	NM_003695.2	GeneID:8581		143865015
20323	cg20356482	0.862319	-109.514	109.514	1.11836e-11	-0.02283	12891.4	149	0.101836	0.885149	0	1	13002.6	149	0.0602987	FBP2	9		NM_003837.2	GeneID:8789	9:96395689-96395929	96395913
15247	cg15250797	0.154375	109.464	109.464	1.13125e-11	0.0282095	14115.5	149	0.126068	0.126165	0	1	13869.6	149	0.0721462	SCTR	2	SR;	NM_002980.1	GeneID:6344	2:119997791-119998904	119997996
20617	cg20661303	0.697639	-109.397	109.397	1.14895e-11	-0.0354477	24552	149	0.17	0.733087	0	1	24772.3	149	0.110206	LEFTY2	1	EBAF; LEFTA; TGFB4; LEFTYA; MGC46222;	NM_003240.2	GeneID:7044		224196184
27345	cg27409364	0.350446	109.32	109.32	1.16947e-11	0.0397951	25697.5	149	0.182966	0.310651	0	1	26139.1	149	0.118309	KCNC1	11	KV4; NGK2; KV3.1; MGC129855;	NM_004976.2	GeneID:3746	11:17712319-17714962	17714319
22082	cg22117143	0.791532	-109.319	109.319	1.16966e-11	-0.0289836	5220.9	149	0.129346	0.820516	0	1	5195.52	149	0.0813286	MPDZ	9	MUPP1; FLJ25909; DKFZp781P216;	NM_003829.1	GeneID:8777		13241431
10983	cg11061975	0.790342	-109.31	109.31	1.17217e-11	-0.0290765	8307.24	149	0.144112	0.819418	0	1	8337.85	149	0.0998395	SIRPB2	20	SIRP-B2; bA77C3.1; SIRPgamma;	NM_018556.2	GeneID:55423		1587325
4600	cg04551925	0.82584	-109.247	109.247	1.18941e-11	-0.0261217	10665	149	0.123228	0.851962	0	1	10586.1	149	0.0829557	AQP1	7	CO; CHIP28; AQP-CHIP; MGC26324;	NM_000385.3	GeneID:358	7:30918039-30918453	30918265
20634	cg20676475	0.746287	-109.232	109.232	1.19347e-11	-0.0323295	5298.45	149	0.158824	0.778616	0	1	5356.13	149	0.0941151	LCE3D	1	LEP16; SPRL6A; SPRL6B;	NM_032563.1	GeneID:84648		150819118
13202	cg13279585	0.661644	-109.2	109.2	1.20224e-11	-0.0373511	3367.91	149	0.183096	0.698995	0	1	3471.11	149	0.121057		2			GeneID:50802		89411504
19395	cg19403023	0.555359	-109.09	109.09	1.23325e-11	-0.0412676	9166.41	149	0.122832	0.596627	0	1	8936.9	149	0.111548	TESSP1	16		XR_001519.1	GeneID:360226	16:2788298-2789206	2788798
27376	cg27443224	0.634777	-109.054	109.054	1.24337e-11	-0.0385739	9302.68	149	0.185032	0.673351	0	1	9385.47	149	0.115419	CCL21	9	ECL; SLC; CKb9; TCA4; 6Ckine; SCYA21; MGC34555;	NM_002989.2	GeneID:6366		34700135
14441	cg14448116	0.857839	-108.996	108.996	1.26014e-11	-0.0232003	17492.6	149	0.126258	0.88104	0	1	17211	149	0.0805841	ADAMTS4	1	ADMP-1; ADAMTS-2; ADAMTS-4; KIAA0688;	NM_005099.3	GeneID:9507		159436734
17012	cg16983159	0.0914849	108.986	108.986	1.26299e-11	0.0225904	7888.15	149	0.0874565	0.0688945	0	1	7977.11	149	0.0515904	LOC340061	5		NM_198282.1	GeneID:340061		138842625
26805	cg26829529	0.592719	-108.908	108.908	1.286e-11	-0.0401574	7937.86	149	0.185495	0.632876	0	1	7784.74	149	0.11652	SPACA3	17	LYC3; LYZL3; SLLP1; ALLP17; MGC119058; 1700025M08Rik;	NM_173847.2	GeneID:124912		28341649
6241	cg06275635	0.698567	-108.799	108.799	1.31853e-11	-0.0352985	3502.59	149	0.173568	0.733866	0	1	3457.42	149	0.111998	PGLYRP3	1	PGRPIA; PGRP-Ialpha;	NM_052891.1	GeneID:114771		151550618
16140	cg16051685	0.849448	-108.787	108.787	1.32209e-11	-0.0239585	10794.7	149	0.102542	0.873406	0	1	10970.9	149	0.0620575	TRIM63	1	IRF; SMRZ; MURF1; MURF2; RNF28; FLJ32380;	NM_032588.2	GeneID:84676		26266670
3477	cg03459809	0.632236	-108.705	108.705	1.3475e-11	-0.0386223	5625.94	149	0.195056	0.670858	0	1	5515.14	149	0.125259	EPHX1	1	MEH; EPHX; EPOX;	NM_000120.2	GeneID:2052		224079633
19999	cg20017995	0.640777	-108.68	108.68	1.35519e-11	-0.0382454	15800.4	149	0.190695	0.679022	0	1	16166	149	0.119977	SURF5	9	MED22; MED24; MGC48682;	NM_181491.1	GeneID:6837		135205897
21582	cg21596858	0.806865	-108.655	108.655	1.36314e-11	-0.0276586	10480.6	149	0.115338	0.834524	0	1	10404.3	149	0.0749202	DCST2	1	FLJ32934; RP11-307C12.4;	NM_144622.1	GeneID:127579		153273878
2151	cg02130905	0.717899	-108.646	108.646	1.36571e-11	-0.034109	18243.4	149	0.135229	0.752008	0	1	18303.6	149	0.0849204	STMN4	8	RB3;	NM_030795.2	GeneID:81551		27172130
20815	cg20858526	0.758159	-108.56	108.56	1.39325e-11	-0.0313987	12952.9	149	0.146849	0.789558	0	1	13145.9	149	0.0923505	CTRC	1	CLCR; ELA4;	NM_007272.2	GeneID:11330		15637652
7380	cg07404485	0.66208	-108.506	108.506	1.41049e-11	-0.0372127	17113.9	149	0.198011	0.699293	0	1	17397.1	149	0.143584	PON1	7	ESA; PON;	NM_000446.3	GeneID:5444		94791589
24981	cg25013053	0.734095	-108.436	108.436	1.43354e-11	-0.033037	5196.26	149	0.144451	0.767132	0	1	5065.46	149	0.0953026	UNC45B	17	CMYA4; UNC45; MGC119541;	NM_173167.2	GeneID:146862		30499144
12307	cg12387247	0.507964	-108.423	108.423	1.43784e-11	-0.042017	10489.1	149	0.165278	0.549981	0	1	10358.2	149	0.106325	FCER2	19	CD23; FCE2; CD23A; IGEBF; CLEC4J;	NM_002002.3	GeneID:2208		7672974
13414	cg13474734	0.817044	-108.262	108.262	1.49204e-11	-0.0267609	22156.1	149	0.105441	0.843805	0	1	22324.1	149	0.0656497	FLJ43339	15	DKFZp686N1468;	NM_207380.1	GeneID:388115		38418083
15219	cg15227610	0.655781	-108.261	108.261	1.49235e-11	-0.0374787	8319.74	149	0.167971	0.69326	0	1	8137.92	149	0.107936	CRYAB	11	CRYA2; CTPP2; HSPB5;	NM_001885.1	GeneID:1410		111287226
6902	cg06908778	0.117652	108.215	108.215	1.50852e-11	0.024924	19306.3	149	0.0985049	0.0927282	0	1	19563.3	149	0.0576708	SPAG6	10	pf16; MGC26276; Repro-SA-1; DKFZp434I153;	NM_012443.2	GeneID:9576	10:22673932-22675060	22674608
21300	cg21312148	0.722388	-108.2	108.2	1.51346e-11	-0.0337587	4737.82	149	0.197596	0.756146	0	1	4763.5	149	0.127779	LCE2D	1	LEP12; SPRL1A;	NM_178430.2	GeneID:353141		150902698
1563	cg01541443	0.750597	-108.19	108.19	1.51716e-11	-0.0318799	3218.46	149	0.160055	0.782477	0	1	3225.11	149	0.105896	Ells1	7	FLJ25903;	NM_152793.1	GeneID:222166		30151840
20193	cg20227165	0.614557	-108.153	108.153	1.53014e-11	-0.0392382	15647.6	149	0.192586	0.653795	0	1	15655.5	149	0.122341	PRDM11	11	PFM8;	NM_020229.2	GeneID:56981		45072395
14095	cg14120879	0.774152	-108.129	108.129	1.53851e-11	-0.0301663	5915.19	149	0.128911	0.804319	0	1	5792.36	149	0.0798083	DEFB105A	8	BD-5; DEFB-5; DEFB105;	NM_152250.1	GeneID:245908		7332048
10422	cg10503138	0.646589	-108.125	108.125	1.53986e-11	-0.0378848	4552.69	149	0.170622	0.684474	0	1	4619.21	149	0.110837	CNTN4	3	AXCAM; BIG-2; CNTN4A; MGC33615;	NM_175607.1	GeneID:152330		2117391
13712	cg13765785	0.17293	108.007	108.007	1.58223e-11	0.0294912	29061.3	149	0.110956	0.143439	0	1	28684.8	149	0.0642767	SCN3B	11	SCNB3; HSA243396;	NM_018400.2	GeneID:55800	11:123029666-123031070	123030148
11139	cg11212312	0.85802	-107.901	107.901	1.62136e-11	-0.0230706	9890.52	149	0.105225	0.881091	0	1	9793.28	149	0.0709545	IL3	5	IL-3; MCGF; MGC79398; MGC79399; MULTI-CSF;	NM_000588.3	GeneID:3562		131423582
10248	cg10321196	0.625734	-107.847	107.847	1.64184e-11	-0.0387415	9528.94	149	0.190103	0.664475	0	1	9589.57	149	0.118964	SLC25A5	X	T2; T3; 2F1; ANT2;	NM_001152.1	GeneID:292		118485919
10040	cg10125195	0.781649	-107.804	107.804	1.65802e-11	-0.029555	15059.2	149	0.14549	0.811204	0	1	14951.1	149	0.0897105	LACRT	12	MGC71934;	NM_033277.1	GeneID:90070		53314812
16427	cg16351002	0.67931	-107.776	107.776	1.66871e-11	-0.0362042	9110.58	149	0.18974	0.715515	0	1	9130.64	149	0.118963	CUZD1	10	ERG-1; UO-44;	NM_022034.3	GeneID:50624		124600091
13488	cg13553455	0.626948	-107.77	107.77	1.67094e-11	-0.0386774	4542.37	149	0.182031	0.665625	0	1	4656.35	149	0.114752	COL17A1	10	BP180; BPAG2; LAD-1; KIAA0204; BA16H23.2;	NM_000494.2	GeneID:1308		105835992
15688	cg15664701	0.566979	-107.693	107.693	1.70098e-11	-0.0407059	6158.15	149	0.176069	0.607685	0	1	6110.52	149	0.113401	AKAP14	X	AKAP28;	NM_178813.5	GeneID:158798		118914686
3396	cg03380645	0.851321	-107.523	107.523	1.76885e-11	-0.0236523	13289.8	149	0.107863	0.874974	0	1	13342.7	149	0.0643809	SFTPB	2	SP-B; PSP-B; SFTB3; SFTP3;	NM_000542.2	GeneID:6439		85748559
25243	cg25249068	0.695077	-107.485	107.485	1.78427e-11	-0.0352888	18948.5	149	0.168726	0.730366	0	1	18939.3	149	0.101357	BFSP2	3	CP47; CP49; LIFL-L;	NM_003571.2	GeneID:8419		134601630
19956	cg19971655	0.879395	-107.38	107.38	1.82806e-11	-0.0209743	18177.6	149	0.100432	0.900369	0	1	18153.8	149	0.0648936	BSND	1	BART; MGC119283; MGC119284; MGC119285;	NM_057176.2	GeneID:7809		55237515
24026	cg24076884	0.181145	107.35	107.35	1.84069e-11	0.0300272	23346	149	0.136662	0.151117	0	1	23259.8	149	0.0857754	PCDHAC2	5	MGC71598; PCDH-ALPHA-C2;	NM_031883.2	GeneID:56134	5:140325975-140327346	140327105
7998	cg08025786	0.8116	-107.195	107.195	1.90774e-11	-0.0270886	6129.22	149	0.109376	0.838689	0	1	6120.04	149	0.0698681	CLK3	15		NM_003992.1	GeneID:1198		72686381
12868	cg12927617	0.728027	-107.156	107.156	1.92486e-11	-0.0332417	3398.35	149	0.159606	0.761268	0	1	3384.74	149	0.106855	ORM1	9	ORM; AGP1; AGP-A;	NM_000607.1	GeneID:5004		116124423
21391	cg21414251	0.57786	-107.098	107.098	1.95079e-11	-0.0402904	4562.09	149	0.180638	0.618151	0	1	4331.49	149	0.117617	OR12D2	6	hs6M1-20; dJ994E9.8;	NM_013936.2	GeneID:26529		29472533
3059	cg03038672	0.825947	-107.081	107.081	1.95821e-11	-0.0258616	6434.39	149	0.134483	0.851809	0	1	6205.53	149	0.0889231	CLDN9	16		NM_020982.2	GeneID:9080		3002057
24901	cg24928161	0.807617	-106.99	106.99	2.00005e-11	-0.0273917	7727.84	149	0.11935	0.835009	0	1	7626.73	149	0.0742791	SHBG	17	ABP; MGC126834;	NM_001040.2	GeneID:6462		7473840
26308	cg26320696	0.110597	106.99	106.99	2.00005e-11	0.0241564	22969	149	0.116034	0.0864408	0	1	22556.3	149	0.0714985	PARVA	11	MXRA2; FLJ10793; FLJ12254;	NM_018222.2	GeneID:55742	11:12355424-12356620	12355685
13283	cg13349425	0.769486	-106.978	106.978	2.00549e-11	-0.0303568	5978.17	149	0.14517	0.799843	0	1	5781.53	149	0.0943781	C5orf20	5	DCNP1;	NM_130848.1	GeneID:140947		134810974
2590	cg02595219	0.211302	106.958	106.958	2.01461e-11	0.0321248	10099.3	149	0.14773	0.179177	0	1	10066.8	149	0.1005	KCNE3	11	HOKPP; MiRP2; MGC129924; DKFZp781H21101;	NM_005472.3	GeneID:10008	11:73855641-73856427	73856409
23654	cg23695504	0.105106	106.69	106.69	2.14304e-11	0.0236262	27519.6	149	0.101183	0.0814794	0	1	26798.3	149	0.0614375	FLJ45717	1		NM_207401.1	GeneID:388759	1:245340797-245342416	245341967
24683	cg24713204	0.207627	106.675	106.675	2.1504e-11	0.031834	25319.5	149	0.141427	0.175793	0	1	25318	149	0.102286	ZNF471	19	ERP1; Z1971; KIAA1396;	NM_020813.1	GeneID:57573	19:61710502-61711930	61711185
17440	cg17412258	0.100518	106.599	106.599	2.18822e-11	0.0231951	6609.69	149	0.104506	0.0773231	0	1	6821.88	149	0.0690546	DLK1	14	FA1; ZOG; pG2; PREF1; Pref-1;	NT_026437.11	GeneID:8788	14:100261944-100263514	100262770
20493	cg20543571	0.869448	-106.571	106.571	2.20247e-11	-0.0218585	10917.5	149	0.0966607	0.891306	0	1	10949.6	149	0.0581969	C15orf43	15	MGC33951;	NM_152448.1	GeneID:145645	15:43036097-43036298	43036170
20518	cg20576002	0.789154	-106.571	106.571	2.20247e-11	-0.0288143	16012.8	149	0.126445	0.817969	0	1	15766.9	149	0.0779532	FAM112B	12	FLJ32942;	NM_144594.1	GeneID:121355		53153920
13362	cg13434842	0.228658	106.326	106.326	2.33013e-11	0.0331766	15233.9	149	0.136612	0.195481	0	1	15221.4	149	0.0906487	GATA4	8	MGC126629;	NT_077531.3	GeneID:2626	8:11605055-11605961	11605305
18083	cg18081104	0.580636	-106.326	106.326	2.33013e-11	-0.0400655	4925.95	149	0.170736	0.620702	0	1	4692.3	149	0.108469	THEM5	1	FLJ37964; MGC126659;	NM_182578.1	GeneID:284486		150092747
20254	cg20291049	0.161678	106.312	106.312	2.33755e-11	0.0283957	15721	149	0.112925	0.133282	0	1	15665.7	149	0.0671613	POU3F3	2	BRN1; OTF8;	NM_006236.1	GeneID:5455	2:104835039-104840521	104838649
11668	cg11721194	0.680893	-106.296	106.296	2.34617e-11	-0.0358782	7122.93	149	0.195258	0.716772	0	1	7265.57	149	0.123159	SLAMF7	1	19A; CS1; CD319; CRACC;	NM_021181.3	GeneID:57823		158975863
7015	cg07028533	0.0888814	106.186	106.186	2.40669e-11	0.0220651	15188.3	149	0.101543	0.0668163	0	1	15283.2	149	0.0609219	CNTNAP2	7	NRXN4; CASPR2; DKFZp781D1846;	NM_014141.3	GeneID:26047	7:145443587-145445242	145444372
26745	cg26780333	0.0852778	106.168	106.168	2.41652e-11	0.0217206	29549.4	149	0.111607	0.0635572	0	1	28946.8	149	0.0702906	ACOT4	14	PTE1B; PTE2B; PTE-Ib;	NM_152331.2	GeneID:122970	14:73126775-73129376	73128725
728	cg00695416	0.0564447	-106.158	106.158	2.4222e-11	-0.0209614	19724.8	149	0.0637489	0.0774061	0	1	20464.1	149	0.110574	CBR1	21	CBR; hCBR1;	NM_001757.2	GeneID:873	21:36363944-36364738	36364346
14696	cg14696820	0.565765	-106.135	106.135	2.43478e-11	-0.0404475	12943.6	149	0.16881	0.606212	0	1	13163.1	149	0.106846	LCE1A	1	LEP1;	NM_178348.1	GeneID:353131		151066792
5627	cg05633152	0.867591	-106.111	106.111	2.44844e-11	-0.0219892	11735.6	149	0.0980134	0.88958	0	1	11649.1	149	0.0608914	SLC10A1	14	NTCP; NTCP1;	NM_003049.1	GeneID:6554		69333564
6804	cg06813842	0.640426	-106.106	106.106	2.45104e-11	-0.0378128	36722.2	149	0.174507	0.678239	0	1	37032.2	149	0.115663	STRC	15	DFNB16;	NM_153700.2	GeneID:161497		41697423
13384	cg13447818	0.759167	-106.098	106.098	2.45561e-11	-0.0309795	6131.27	149	0.157704	0.790146	0	1	6076.86	149	0.104361	FLG	1		NM_002016.1	GeneID:2312		150565508
3012	cg02998425	0.798377	-105.889	105.889	2.57691e-11	-0.0280005	9836.68	149	0.145874	0.826378	0	1	9573.28	149	0.0888739	ADAM21	14	ADAM31; MGC125389;	NM_003813.2	GeneID:8747		69993957
6169	cg06210526	0.808709	-105.878	105.878	2.58345e-11	-0.0271649	9204.06	149	0.154362	0.835874	0	1	9237.66	149	0.13615	CYP2F1	19	C2F1; CYP2F; MGC126121;	NM_000774.3	GeneID:1572		46311690
4992	cg04950711	0.92241	-105.861	105.861	2.5937e-11	-0.0164511	14100.6	149	0.0729121	0.938861	0	1	14336.3	149	0.0474371	MAGEA10	X	MAGE10; MGC10599;	NM_021048.3	GeneID:4109	X:151057178-151057470	151057374
7866	cg07905963	0.556992	-105.839	105.839	2.60669e-11	-0.0406128	9622.99	149	0.176245	0.597605	0	1	9608.59	149	0.120802	CYP2A13	19	CPAD; CYP2A;	NM_000766.3	GeneID:1553		46285010
18670	cg18669381	0.624118	-105.829	105.829	2.61264e-11	-0.0384484	23373.2	149	0.187049	0.662566	0	1	23860.1	149	0.115802	ARHGEF19	1	WGEF; FLJ33962; RP4-733M16.1;	NM_153213.2	GeneID:128272		16411675
1663	cg01643624	0.738434	-105.803	105.803	2.62857e-11	-0.0323584	10784.5	149	0.140957	0.770792	0	1	10609.5	149	0.0924094	C11orf16	11		NM_020643.1	GeneID:56673		8911469
22897	cg22937320	0.880606	-105.8	105.8	2.63009e-11	-0.0207072	21396.4	149	0.0850074	0.901313	0	1	21959.4	149	0.0543019	C9orf138	9	FLJ35283; MGC35182;	NM_153707.1	GeneID:158297	9:19022551-19022907	19022778
18817	cg18815943	0.0622941	105.717	105.717	2.68114e-11	0.0194292	21278.7	149	0.0782265	0.0428649	0	1	21209	149	0.0456563	FOXE3	1	ASMD; FKHL12; FREAC8;	NM_012186.1	GeneID:2301	1:47654351-47655785	47654901
7798	cg07841014	0.842641	-105.71	105.71	2.68559e-11	-0.0242413	8428.89	149	0.10295	0.866883	0	1	8464.03	149	0.0642144	REG1B	2	REGH; REGL; PSPS2; REGI-BETA;	NM_006507.2	GeneID:5968		79168253
23978	cg24024214	0.853024	-105.679	105.679	2.70483e-11	-0.0233	11840.6	149	0.107318	0.876324	0	1	11692.2	149	0.0683229	BTNL8	5	FLJ21458;	NM_024850.1	GeneID:79908	5:180258708-180258931	180258748
11969	cg12019109	0.772926	-105.658	105.658	2.71775e-11	-0.0299206	5493.81	149	0.150991	0.802847	0	1	5370.53	149	0.0961767	AZGP1	7	ZAG; ZA2G;	NM_001185.2	GeneID:563		99412319
7402	cg07432969	0.907098	-105.612	105.612	2.74669e-11	-0.0180344	21995.9	149	0.0776321	0.925133	0	1	22152.6	149	0.0490281	GPR35	2		NM_005301.2	GeneID:2859	2:241218177-241218615	241218230
21111	cg21142398	0.739651	-105.535	105.535	2.79583e-11	-0.032237	2498.25	149	0.150874	0.771888	0	1	2556.58	149	0.105476	GLIS1	1	FLJ36155;	NM_147193.1	GeneID:148979		53972666
4945	cg04897683	0.152159	105.359	105.359	2.91172e-11	0.027514	14029.6	149	0.108967	0.124645	0	1	14080.9	149	0.0664362	NEUROG1	5	AKA; ngn1; Math4C; NEUROD3;	NM_006161.2	GeneID:4762	5:134898284-134900130	134899361
25298	cg25310567	0.605518	-105.314	105.314	2.94205e-11	-0.0390593	4180.58	149	0.176918	0.644578	0	1	4252.51	149	0.11439	GALNTL5	7	GALNT15;	NM_145292.2	GeneID:168391		151284823
13458	cg13519373	0.596304	-105.231	105.231	2.9984e-11	-0.0393628	4467.52	149	0.18896	0.635667	0	1	4214.81	149	0.12064	IL8RA	2	C-C; CD128; CD181; CKR-1; CXCR1; IL8R1; CMKAR1; IL8RBA; CDw128a; C-C CKR-1; C-C-CKR-1;	NM_000634.2	GeneID:3577		218739143
22389	cg22418360	0.111025	105.207	105.207	3.01495e-11	0.0239997	8813.98	149	0.0953483	0.0870252	0	1	8868.93	149	0.0587593	UBE2F	2	NCE2; MGC18120;	NM_080678.1	GeneID:140739	2:238539370-238541230	238541084
26883	cg26916607	0.823442	-105.084	105.084	3.1017e-11	-0.0258407	7651.41	149	0.122984	0.849283	0	1	7539.46	149	0.0814294	CETP	16		NM_000078.1	GeneID:1071		55552271
20818	cg20862119	0.789906	-105.049	105.049	3.12658e-11	-0.0285558	8651.63	149	0.143103	0.818462	0	1	8495.35	149	0.0935119	KRT2B	12	KRT2P;	NM_015848.1	GeneID:51350		51457284
25419	cg25427638	0.756027	-104.897	104.897	3.23832e-11	-0.0310302	17813.5	149	0.180936	0.787057	0	1	17923	149	0.130457	CYP2A7	19	CPA7; CPAD; CYP2A; CYPIIA7; P450-IIA4;	NM_030589.2	GeneID:1549		46081197
20273	cg20312228	0.139965	104.849	104.849	3.27416e-11	0.0264543	25540.4	149	0.135174	0.11351	0	1	25139.9	149	0.086289	CCDC37	3	FLJ40083; MGC120558;	NM_182628.1	GeneID:348807	3:127595793-127596808	127596397
25651	cg25665697	0.696027	-104.849	104.849	3.27416e-11	-0.0348107	9430.73	149	0.169755	0.730838	0	1	9130.87	149	0.111289	LCTL	15	KLG; KLPH; FLJ33279;	NM_207338.1	GeneID:197021		64644935
5991	cg06003187	0.8844	-104.768	104.768	3.33572e-11	-0.0202413	18051.4	149	0.0930457	0.904641	0	1	18088.4	149	0.0559282	GUCA2A	1	GUCA2; STARA; GUANYLIN;	NM_033553.2	GeneID:2980		42402385
23229	cg23256150	0.638962	-104.768	104.768	3.33572e-11	-0.0376416	2500.31	149	0.157224	0.676603	0	1	2494.44	149	0.103512	NR1H4	12	BAR; FXR; HRR1; HRR-1; RIP14;	NM_005123.1	GeneID:9971		99391889
18828	cg18833140	0.690309	-104.716	104.716	3.37559e-11	-0.0351071	4766.53	149	0.122445	0.725417	0	1	4773.89	149	0.0848664	HABP2	10	FSAP; HABP; PHBP; HGFAL;	NM_004132.2	GeneID:3026		115302543
27386	cg27456885	0.669687	-104.709	104.709	3.38135e-11	-0.036192	2673.29	149	0.139131	0.705879	0	1	2723.07	149	0.0903989	KRTAP22-1	21	KAP22.1; MGC126731; MGC126735;	NM_181620.1	GeneID:337979		30894784
13632	cg13688966	0.659757	-104.696	104.696	3.3918e-11	-0.0366779	4029.75	149	0.195028	0.696435	0	1	3922.93	149	0.121501	TM4SF4	3	ILTMP; il-TMP; FLJ31015;	NM_004617.2	GeneID:7104		150675067
14549	cg14544583	0.665985	-104.635	104.635	3.43993e-11	-0.0363638	2639.49	149	0.164278	0.702349	0	1	2592.8	149	0.107736	HBB	11	HBD; CD113t-C; hemoglobin;	NM_000518.4	GeneID:3043		5205142
21807	cg21825364	0.91056	-104.602	104.602	3.46617e-11	-0.0175958	24826.7	149	0.0733712	0.928156	0	1	24561.7	149	0.0448238	VCY	Y	BPY1; VCY1; VCY1A; MGC119817;	NM_004679.2	GeneID:9084	Y:14677314-14677669	14677489
13272	cg13338132	0.882828	-104.551	104.551	3.50687e-11	-0.0203736	11387.9	149	0.083382	0.903202	0	1	11587.2	149	0.0539345	FAM71C	12	MGC39520;	NM_153364.1	GeneID:196472	12:98566088-98566372	98566115
14114	cg14141399	0.886921	-104.551	104.551	3.50687e-11	-0.0199737	14698.4	149	0.0771805	0.906894	0	1	14847.8	149	0.0520554	HAS1	19	HAS;	NM_001523.1	GeneID:3036	19:56919725-56919930	56919860
17434	cg17405586	0.64473	-104.539	104.539	3.51625e-11	-0.0373458	3428.01	149	0.173794	0.682075	0	1	3246.32	149	0.114227	KRT1	12	K1; CK1; EHK1; KRT1A;	NM_006121.2	GeneID:3848		51360524
14411	cg14419187	0.120409	104.533	104.533	3.52095e-11	0.0247518	8248.83	149	0.113951	0.0956574	0	1	8087.36	149	0.0765246	C2orf21	2	FLJ33496;	NM_182587.1	GeneID:285175	2:210344445-210345400	210345339
722	cg00690280	0.682691	-104.498	104.498	3.54952e-11	-0.0354812	5342.43	149	0.177922	0.718172	0	1	5390.9	149	0.110642	WFDC10B	20	WAP12;	NM_172006.2	GeneID:280664		43766147
19701	cg19723473	0.744799	-104.49	104.49	3.55599e-11	-0.0317371	7420.36	149	0.145462	0.776536	0	1	7369.01	149	0.0977411	B3GALT1	2	MGC126594; beta3Gal-T1;	NM_020981.2	GeneID:8708		168383286
20214	cg20253700	0.672029	-104.49	104.49	3.55599e-11	-0.0360338	2924.95	149	0.150356	0.708062	0	1	2909.18	149	0.0951624	TSC2	16	LAM; TSC4; uberin; TUBERIN;	NM_000548.2	GeneID:7249	16:2039489-2039852	2039509
19204	cg19216731	0.661133	-104.428	104.428	3.60712e-11	-0.0365633	5457.48	149	0.18837	0.697696	0	1	5556.86	149	0.11887	CSRP3	11	CLP; MLP; CRP3; LMO4; CMD1M; MGC14488; MGC61993;	NM_003476.2	GeneID:8048		19180211
23945	cg23988567	0.821417	-104.378	104.378	3.64914e-11	-0.0259253	26246	149	0.113352	0.847342	0	1	26348.4	149	0.0700468		14			GeneID:3502		105308587
2052	cg02019333	0.595815	-104.363	104.363	3.66168e-11	-0.0392147	9719.42	149	0.173096	0.63503	0	1	9664.69	149	0.1169	UPK1B	3	UPIB; UPK1; TSPAN20;	NM_006952.3	GeneID:7348		120374905
21713	cg21707816	0.612166	-104.363	104.363	3.66168e-11	-0.0386405	4306.21	149	0.172302	0.650806	0	1	4342.53	149	0.116297	ENDOGL1	3	ENGL; ENGL-B; ENGL-a; ENDOGL2; MGC125944; MGC125945;	NM_005107.1	GeneID:9941	3:38512323-38513389	38512455
3928	cg03886110	0.340886	104.356	104.356	3.66809e-11	0.0385376	18329.1	149	0.163858	0.302348	0	1	18331.6	149	0.112386	PECAM1	17	CD31; PECAM-1;	NM_000442.2	GeneID:5175	17:59817605-59817882	59817773
23144	cg23174481	0.804248	-104.314	104.314	3.70314e-11	-0.0273269	6208.62	149	0.112389	0.831575	0	1	6243.17	149	0.0716857	FLJ35784	19		NM_198534.1	GeneID:374877		7468555
663	cg00638514	0.088406	104.311	104.311	3.70595e-11	0.0218286	11843.8	149	0.0947372	0.0665774	0	1	12003.8	149	0.0626543	OTOP3	17		NM_178233.1	GeneID:347741	17:70443189-70444298	70443643
10653	cg10751811	0.484314	-104.224	104.224	3.78077e-11	-0.0414164	3748.4	149	0.140728	0.52573	0	1	3752.07	149	0.0989533	CYP4Z1	1	CYP4A20;	NM_178134.2	GeneID:199974		47306563
15319	cg15317267	0.898712	-104.224	104.224	3.78077e-11	-0.0187702	20741.5	149	0.0809241	0.917482	0	1	20763.7	149	0.0491109	H19	11	ASM; BWS; ASM1; MGC4485; PRO2605; D11S813E;	NR_002196.1	GeneID:283120	11:1973888-1974871	1974823
4493	cg04457979	0.124982	104.134	104.134	3.8602e-11	0.0250998	9624.52	149	0.0885178	0.0998824	0	1	9996.17	149	0.0552161	KCNQ1DN	11	BWRT; HSA404617;	NM_018722.1	GeneID:55539	11:2846828-2848015	2847223
10289	cg10364182	0.160704	104.112	104.112	3.87981e-11	0.0280289	5043.35	149	0.108589	0.132675	0	1	5076.69	149	0.0699955	LOC119710	11		NM_138787.2	GeneID:119710		36572574
11778	cg11828089	0.880883	-104.084	104.084	3.90508e-11	-0.0205164	25797.8	149	0.0995073	0.901399	0	1	25298.9	149	0.0645368	CALN1	7		NM_031468.2	GeneID:83698		71516057
15221	cg15228639	0.740468	-103.999	103.999	3.98226e-11	-0.0319513	11134	149	0.164109	0.772419	0	1	11033.1	149	0.0991789	PLA2G4E	15	FLJ45651; MGC126633; MGC126661;	NM_198442.1	GeneID:123745		40077231
16837	cg16790239	0.114639	103.995	103.995	3.98547e-11	0.0241831	7056.84	149	0.0945647	0.090456	0	1	7038.51	149	0.0639879	MC1R	16	MSH-R; MGC14337;	NM_002386.2	GeneID:4157	16:88512584-88512791	88512755
26695	cg26738880	0.680073	-103.952	103.952	4.02504e-11	-0.0355256	3146.58	149	0.193918	0.715598	0	1	3144.47	149	0.121036	DPP6	7	DPPX; MGC46605;	NM_001936.2	GeneID:1804		154059965
5815	cg05824215	0.61118	-103.858	103.858	4.11358e-11	-0.0385832	4329.68	149	0.181628	0.649763	0	1	4278.2	149	0.112206	CCR6	6	BN-1; CKR6; DCR2; CD196; CKRL3; DRY-6; GPR29; CKR-L3; CMKBR6; GPRCY4; STRL22; GPR-CY4;	NM_004367.3	GeneID:1235		167456036
11000	cg11075745	0.851189	-103.711	103.711	4.2554e-11	-0.0232546	25738.7	149	0.123706	0.874443	0	1	26008.6	149	0.0823761	CLDN19	1		NM_148960.1	GeneID:149461		42978563
3927	cg03885639	0.78791	-103.707	103.707	4.25912e-11	-0.0285282	21205	149	0.134636	0.816439	0	1	21067.7	149	0.0849408	PANX3	11		NM_052959.2	GeneID:116337		123986520
5732	cg05731779	0.810755	-103.697	103.697	4.26923e-11	-0.0267229	6098.77	149	0.138106	0.837477	0	1	6172.9	149	0.0906018	MGC13034	5		NM_153217.1	GeneID:134288		72499443
4703	cg04645843	0.683464	-103.693	103.693	4.27268e-11	-0.0353031	7124.81	149	0.164625	0.718767	0	1	7146.71	149	0.101554	DPCR1	6	PBLT; bCX105N19.6;	NM_080870.2	GeneID:135656		31026632
13794	cg13842648	0.578693	-103.653	103.653	4.31191e-11	-0.0396128	10373	149	0.176842	0.618305	0	1	10271	149	0.113069	IL9	5	P40; HP40; IL-9;	NM_000590.1	GeneID:3578		135259425
1625	cg01605984	0.670081	-103.648	103.648	4.31748e-11	-0.0359864	18557.2	149	0.184793	0.706067	0	1	18907.8	149	0.116245	SURF5	9	MED22; MED24; MGC48682;	NM_181491.1	GeneID:6837		135205975
10729	cg10834677	0.674513	-103.618	103.618	4.3476e-11	-0.0357567	4610.25	149	0.163896	0.71027	0	1	4411.09	149	0.104659	FAM19A3	1	TAFA3; TAFA-3; RP11-426L16.6;	NM_182759.2	GeneID:284467		113064812
18538	cg18524091	0.790914	-103.606	103.606	4.35923e-11	-0.0282827	15828.7	149	0.0964271	0.819196	0	1	15775.5	149	0.062412	TAS1R2	1	TR2; T1R2; GPR71;	NM_152232.1	GeneID:80834		19058359
21592	cg21604856	0.697162	-103.506	103.506	4.46046e-11	-0.0345221	7042.64	149	0.194575	0.731684	0	1	7438.17	149	0.122182	SUHW1	22	ZNF280; ZNF636; 3 OY11.1;	NM_080740.3	GeneID:129025		21204677
14054	cg14087150	0.73218	-103.472	103.472	4.49542e-11	-0.0324098	5875.07	149	0.153737	0.76459	0	1	5847.65	149	0.0947672	KRTAP4-4	17	KAP4.4; KRTAP4.4;	NM_032524.1	GeneID:84616		36570165
19759	cg19780563	0.768089	-103.445	103.445	4.52356e-11	-0.0299623	4262.75	149	0.155766	0.798052	0	1	4202.52	149	0.102387	EXOC6	10	SEC15L; Sec15p; FLJ1125; SEC15L1; FLJ11251; MGC33397; DKFZp761I2124;	NM_001013848.1	GeneID:54536		94584474
6944	cg06952310	0.493976	-103.413	103.413	4.55732e-11	-0.0411778	7488.99	149	0.154731	0.535154	0	1	7397.67	149	0.104137	CSPG3	19	NCAN;	NM_004386.1	GeneID:1463		19188990
14208	cg14228238	0.0880493	103.394	103.394	4.5772e-11	0.0217017	9124.03	149	0.0954502	0.0663476	0	1	9131.69	149	0.0613858	EVI1	3	EVI-1; PRDM3; MDS1-EVI1; AML1-EVI-1;	NM_005241.1	GeneID:2122	3:170346659-170347262	170346817
7787	cg07826255	0.613489	-103.357	103.357	4.61626e-11	-0.0384035	4726.85	149	0.19121	0.651892	0	1	4722.26	149	0.122391	SGCA	17	A2; ADL; DAG2; DMDA2; 50-DAG; LGMD2D; SCARMD1; adhalin;	NM_000023.1	GeneID:6442		45598706
16882	cg16834187	0.771384	-103.357	103.357	4.61626e-11	-0.0297107	3510.2	149	0.123819	0.801095	0	1	3520.58	149	0.083075	BRD7	16	BP75; NAG4; CELTIX1;	NM_013263.2	GeneID:29117		48961787
11311	cg11378052	0.665779	-103.356	103.356	4.61796e-11	-0.0361479	3002.72	149	0.154937	0.701927	0	1	3066.08	149	0.10205	MGC48595	14		NM_203309.1	GeneID:399671	14:73096802-73097009	73096811
13023	cg13105904	0.206355	-103.251	103.251	4.72988e-11	-0.0333799	16217.7	149	0.122056	0.239734	0	1	16769.4	149	0.135162	KIAA0323	14		NM_015299.1	GeneID:23351	14:23969777-23969995	23969884
14906	cg14898892	0.689174	-103.238	103.238	4.74482e-11	-0.034918	2559.96	149	0.156471	0.724092	0	1	2604.34	149	0.113816	SHRM	4	MSTP013; KIAA1481;	NM_020859.1	GeneID:57619		77575204
16699	cg16638540	0.158634	103.136	103.136	4.85758e-11	0.0277381	20746.5	149	0.160404	0.130896	0	1	21114.4	149	0.106364	ZNF135	19	ZNF61; pHZ-17;	NM_003436.2	GeneID:7694	19:63262091-63264376	63262280
19874	cg19882093	0.861299	-103.087	103.087	4.91213e-11	-0.0222651	13175.9	149	0.102102	0.883564	0	1	13215.2	149	0.0683016	GGTLA4	20	MGC50550; dJ831C21.2;	NM_178311.1	GeneID:92086	20:23916273-23917531	23917397
3826	cg03801286	0.469189	103.05	103.05	4.95439e-11	0.0411637	12707.6	149	0.161085	0.428025	0	1	12877.6	149	0.120978	KCNE1	21	ISK; JLNS; LQT5; MinK; MGC33114;	NM_000219.2	GeneID:3753		34806378
6081	cg06119575	0.758117	-103.029	103.029	4.97852e-11	-0.0306083	3749.73	149	0.162807	0.788726	0	1	3792.08	149	0.109857	TAL2	9		NM_005421.1	GeneID:6887		107464726
18088	cg18084114	0.75429	-103.024	103.024	4.98414e-11	-0.0308722	4502.13	149	0.138273	0.785162	0	1	4366.33	149	0.093095	MATN1	1	CMP; CRTM;	NM_002379.2	GeneID:4146		30969805
2498	cg02500392	0.706678	-102.965	102.965	5.05196e-11	-0.033888	4508.18	149	0.198222	0.740566	0	1	4541.14	149	0.129156	PBOV1	6	UC28; UROC28; dJ171N11.2;	NM_021635.1	GeneID:59351		138581065
4032	cg03986640	0.795522	-102.907	102.907	5.12083e-11	-0.0278327	10084.9	149	0.124959	0.823354	0	1	9993.06	149	0.0802612	MIP	12	AQP0; LIM1; MP26; MIP26;	NM_012064.2	GeneID:4284		55134622
7324	cg07342901	0.844204	-102.846	102.846	5.19338e-11	-0.0237808	6070.53	149	0.103668	0.867985	0	1	6377.06	149	0.0693787	H19	11	ASM; BWS; ASM1; MGC4485; PRO2605; D11S813E;	NR_002196.1	GeneID:283120		1975300
21964	cg21991396	0.488671	102.781	102.781	5.27145e-11	0.0412018	6531.12	149	0.157379	0.447469	0	1	6573.67	149	0.124119	CIAS1	1	FCU; MWS; FCAS; NALP3; C1orf7; PYPAF1; AII/AVP; AGTAVPRL;	NM_183395.1	GeneID:114548		245648040
16569	cg16501235	0.739543	-102.631	102.631	5.4567e-11	-0.0318049	9273.25	149	0.12024	0.771348	0	1	9203.67	149	0.0808549	C1orf54	1	FLJ23221;	NM_024579.1	GeneID:79630		148512612
24970	cg24999727	0.698632	-102.626	102.626	5.46198e-11	-0.0342946	2617.57	149	0.147549	0.732927	0	1	2588.2	149	0.102519	HSD17B13	4	SCDR9; NIIL497; HMFN0376;	NM_178135.2	GeneID:345275		88462842
8290	cg08343834	0.610534	-102.559	102.559	5.54741e-11	-0.0383656	4291.49	149	0.177731	0.6489	0	1	4206.93	149	0.110742	PMP22	17	DSS; HNPP; CMT1A; CMT1E; GAS-3; Sp110; MGC20769;	NM_000304.2	GeneID:5376		15109383
14480	cg14473924	0.180766	102.528	102.528	5.58727e-11	0.0293324	8763.31	149	0.128864	0.151434	0	1	8621.35	149	0.0778646	PDZRN3	3	LNX3; SEMACAP3;	NM_015009.1	GeneID:23024	3:73755774-73757236	73756860
22611	cg22642718	0.922775	-102.453	102.453	5.68447e-11	-0.0161544	28364.3	149	0.0790526	0.938929	0	1	28000.1	149	0.0510523	KCNJ12	17	IRK2; hIRK; KCNJN1; Kir2.2; Kir2.2v; kcnj12x; hkir2.2x;	NM_021012.3	GeneID:3768	17:21259142-21260782	21259430
16777	cg16731240	0.200838	102.433	102.433	5.71031e-11	0.0307435	6963.88	149	0.16473	0.170094	0	1	6697.59	149	0.109543	ZNF577	19	MGC4400;	NM_032679.1	GeneID:84765	19:57082498-57083311	57083062
21103	cg21137417	0.714075	-102.418	102.418	5.7302e-11	-0.0333647	3038.64	149	0.155029	0.74744	0	1	3032.08	149	0.106425	SPP2	2	SPP24;	NM_006944.2	GeneID:6694		234624195
11073	cg11158374	0.776551	-102.342	102.342	5.8323e-11	-0.0291922	10533	149	0.131106	0.805743	0	1	10171.7	149	0.0853207	TFF2	21	SP; SML1;	NM_005423.3	GeneID:7032		42644733
14246	cg14271690	0.823659	-102.271	102.271	5.9283e-11	-0.0254814	9960.75	149	0.102881	0.84914	0	1	9962.16	149	0.0673643	SMAF1	20	KIAA1219; MGC39724; RP5-1100H13.2;	NM_001018082.1	GeneID:149685		36643413
19401	cg19404979	0.618628	-102.079	102.079	6.19641e-11	-0.0379778	6185.4	149	0.181255	0.656606	0	1	6287.77	149	0.122846	ELSPBP1	19	E12; HE12;	NM_022142.3	GeneID:64100		53189843
20331	cg20366831	0.673863	-102.049	102.049	6.23893e-11	-0.0355234	7931.97	149	0.163813	0.709387	0	1	8143.75	149	0.111079	APBA3	19	X11L2; mint3; MGC:15815;	NM_004886.3	GeneID:9546		3711955
23224	cg23248452	0.61813	-102.03	102.03	6.26556e-11	-0.0379874	2724.61	149	0.162581	0.656117	0	1	2816.65	149	0.11483	TAS2R1	5	T2R1; TRB7;	NM_019599.2	GeneID:50834		9684117
317	cg00298357	0.857895	-102.023	102.023	6.27552e-11	-0.0224653	30985.3	149	0.112021	0.88036	0	1	30498.8	149	0.076029	IL17B	5	IL-20; IL-17B; ZCYTO7;	NM_014443.2	GeneID:27190		148738984
5793	cg05798712	0.654264	-101.941	101.941	6.39558e-11	-0.0364523	4049.14	149	0.154424	0.690716	0	1	3946.57	149	0.101169	FABP7	6	MRG; BLBP; FABPB; B-FABP; DKFZp547J2313;	NM_001446.3	GeneID:2173		123142606
9787	cg09871043	0.645869	-101.936	101.936	6.4031e-11	-0.0368303	7636.19	149	0.167078	0.682699	0	1	7639.14	149	0.104631	PKHD1	6	FCYT; ARPKD; TIGM1;	NM_138694.2	GeneID:5314		52060320
7034	cg07047653	0.820484	-101.919	101.919	6.42851e-11	-0.0257032	11433.2	149	0.102419	0.846187	0	1	11361.8	149	0.0679842	AQP2	12	AQP-CD; WCH-CD; MGC34501;	NM_000486.3	GeneID:359		48630893
27520	cg27592112	0.821648	-101.804	101.804	6.60055e-11	-0.0255931	5819.09	149	0.114022	0.847241	0	1	5870.48	149	0.0697142	GABRG3	15		NM_033223.1	GeneID:2567		25343690
21031	cg21066636	0.590015	-101.771	101.771	6.65105e-11	-0.038913	12601.5	149	0.181873	0.628928	0	1	12372.6	149	0.118075	TM4SF5	17		NM_003963.2	GeneID:9032		4622041
27223	cg27285056	0.616669	-101.77	101.77	6.65273e-11	-0.0379937	6829.85	149	0.159098	0.654663	0	1	6859.85	149	0.101734	NAPSA	19	KAP; Kdap; NAP1; NAPA; SNAPA;	NM_004851.1	GeneID:9476		55560691
17349	cg17328659	0.0895036	101.629	101.629	6.87148e-11	0.021658	15070.4	149	0.0932866	0.0678456	0	1	15154.2	149	0.0560972	STUB1	16	CHIP; UBOX1; HSPABP2; NY-CO-7; SDCCAG7;	NM_005861.2	GeneID:10273	16:669403-671740	669499
15542	cg15540820	0.108709	101.567	101.567	6.9706e-11	0.0233885	11426	149	0.107558	0.0853205	0	1	11484.4	149	0.0760134	EOMES	3	TBR2;	NM_005442.2	GeneID:8320	3:27740182-27740876	27740287
25229	cg25229305	0.658143	-101.545	101.545	7.006e-11	-0.0362024	3195.71	149	0.180834	0.694346	0	1	3191.58	149	0.116361	KCNK18	10	TRIK; TRESK; TRESK2; TRESK-2;	NM_181840.1	GeneID:338567		118946629
27385	cg27453644	0.344198	101.5	101.5	7.07881e-11	0.0381333	14621.8	149	0.152101	0.306065	0	1	14575.3	149	0.119362	BCAP31	X	CDM; BAP31; 6C6-AG; DXS1357E;	NM_005745.6	GeneID:10134	X:152643867-152644966	152643968
15728	cg15700197	0.600971	-101.402	101.402	7.24069e-11	-0.0384869	2211.88	149	0.173359	0.639458	0	1	2125.03	149	0.119016	OR10J1	1	HGMP07J; HSHGMP07J;	NM_012351.1	GeneID:26476		157675831
12419	cg12493906	0.790722	-101.356	101.356	7.31846e-11	-0.0279986	6728.86	149	0.154873	0.81872	0	1	6525.4	149	0.0993115	MMP26	11	MGC126590; MGC126592;	NM_021801.3	GeneID:56547		4965887
12764	cg12815142	0.744687	-101.245	101.245	7.50827e-11	-0.0312592	5772.36	149	0.126438	0.775946	0	1	5788.22	149	0.0806098	SPAG7	17	ACRP; FSA-1; MGC20134;	NM_004890.1	GeneID:9552	17:4813118-4813369	4813327
7757	cg07792737	0.941469	-101.217	101.217	7.55666e-11	-0.0140772	23000.3	149	0.0537926	0.955546	0	1	23237.8	149	0.0316796	NPIP	16		NM_006985.1	GeneID:9284		14938303
24227	cg24286301	0.69423	-101.09	101.09	7.78037e-11	-0.0342888	5514.5	149	0.168262	0.728519	0	1	5443.25	149	0.114792	GUCY2F	X	CYGF; GC-F; GUC2F; GUC2DL; RETGC-2; ROS-GC2;	NM_001522.1	GeneID:2986		108612196
21959	cg21985470	0.826462	-101.062	101.062	7.82979e-11	-0.0251031	11593.7	149	0.125134	0.851565	0	1	11780.4	149	0.0847564	PKLR	1	PK1; PKL; RPK;	NM_000298.3	GeneID:5313		153538047
1857	cg01830294	0.181332	101.055	101.055	7.84278e-11	0.0291698	35639	149	0.14422	0.152162	0	1	35159.4	149	0.0942229	WNT2	7	IRP; INT1L1;	NM_003391.1	GeneID:7472	7:116749909-116752225	116750728
27400	cg27465849	0.853739	-100.948	100.948	8.0397e-11	-0.0227261	10164	149	0.0950502	0.876465	0	1	10361	149	0.0604772	THEDC1	10	FLJ11106; MGC51852;	NM_018324.1	GeneID:55301	10:15124803-15125057	15124849
22254	cg22283058	0.819717	-100.917	100.917	8.09618e-11	-0.0256454	6702.48	149	0.117246	0.845363	0	1	6714.91	149	0.0760766	GPR37L1	1	ETBR-LP-2; ET(B)R-LP-2;	NM_004767.2	GeneID:9283		200357798
11206	cg11270633	0.680482	-100.902	100.902	8.12512e-11	-0.0349899	6826.23	149	0.182046	0.715472	0	1	6829.2	149	0.116193	IL28B	19	IFNL3; IL28C; IL-28B;	NM_172139.2	GeneID:282617		44428796
25667	cg25682080	0.670354	-100.893	100.893	8.14142e-11	-0.0355009	4777.19	149	0.191353	0.705855	0	1	4696.82	149	0.120149	APOA5	11	RAP3; APOAV; APOA-V; MGC126836; MGC126838;	NM_052968.3	GeneID:116519		116168313
9969	cg10054857	0.665754	-100.863	100.863	8.1971e-11	-0.0357208	2954.36	149	0.166355	0.701475	0	1	2949.69	149	0.114566	C18orf20	18	HsT1235; MGC39571;	NM_152728.1	GeneID:221241		59967523
25971	cg25993152	0.728471	-100.863	100.863	8.1971e-11	-0.0322421	3299.56	149	0.16892	0.760713	0	1	3327.39	149	0.113186	XAGE5	X	GAGED5; XAGE-5;	NM_130775.1	GeneID:170627	X:52857013-52857693	52857461
399	cg00396894	0.71295	-100.758	100.758	8.39808e-11	-0.0331678	14800.4	149	0.127975	0.746117	0	1	14742.7	149	0.0848089	MGC44505	2		NM_178553.2	GeneID:339779		27215924
392	cg00384537	0.749229	-100.719	100.719	8.47442e-11	-0.0308775	5804.01	149	0.159999	0.780107	0	1	5889.47	149	0.0970809	KRTHA5	17	HA5; Ha-5; hHa5;	NM_002280.3	GeneID:3886		36891489
14931	cg14920334	0.472631	-100.719	100.719	8.47442e-11	-0.0407701	7189.81	149	0.153837	0.513401	0	1	7000.86	149	0.111974	GALNT8	12	GALNAC-T8;	NM_017417.1	GeneID:26290		4700088
927	cg00899659	0.269752	100.645	100.645	8.61986e-11	0.0346564	5211.21	149	0.158764	0.235095	0	1	5279.09	149	0.104959	ZNF22	10	KOX15; HKR-T1; ZNF422; Zfp422;	NM_006963.3	GeneID:7570		44815977
10901	cg10989326	0.658477	-100.619	100.619	8.67122e-11	-0.0360243	2929.93	149	0.178206	0.694502	0	1	2884.99	149	0.109305	EVI5	1	NB4S;	NM_005665.4	GeneID:7813		93031496
782	cg00754253	0.297059	100.445	100.445	9.02527e-11	0.0359846	4371.81	149	0.156388	0.261074	0	1	4305.06	149	0.0999841	HRASLS5	11	HRLP5;	NM_054108.1	GeneID:117245		63015763
1966	cg01941619	0.675837	-100.341	100.341	9.24507e-11	-0.0351327	3429.93	149	0.160368	0.71097	0	1	3383.6	149	0.107289	MEP1B	18		NM_005925.1	GeneID:4225		28024079
20504	cg20556988	0.763516	-100.316	100.316	9.29758e-11	-0.0298422	7866.85	149	0.144913	0.793358	0	1	7990.31	149	0.0821656	CCL1	17	P500; SISe; TCA3; I-309; SCYA1;	NM_002981.1	GeneID:6346		29714240
21458	cg21478437	0.838788	-100.293	100.293	9.3476e-11	-0.0239658	8869.35	149	0.113996	0.862753	0	1	8990.45	149	0.0807137	CTSE	1		NM_001910.2	GeneID:1510		204484026
18326	cg18330203	0.778729	-100.223	100.223	9.4997e-11	-0.0287405	16911.3	149	0.115908	0.80747	0	1	16719	149	0.077088	TNNT2	1	CMH2; TnTC; cTnT; CMD1D; MGC3889;	NM_000364.2	GeneID:7139		199613270
14858	cg14851685	0.921784	-100.112	100.112	9.74608e-11	-0.0160806	23054	149	0.0667982	0.937864	0	1	23808.7	149	0.0400065	FLJ39501	19		NM_173483.1	GeneID:126410		15479559
26151	cg26164184	0.85857	-100.076	100.076	9.82539e-11	-0.0221986	7945.24	149	0.108816	0.880769	0	1	8097.53	149	0.0781804	FCN2	9	P35; FCNL; EBP-37; ficolin-2;	NM_004108.2	GeneID:2220		136911327
12113	cg12177001	0.784863	-99.9537	99.9537	1.01072e-10	-0.0282517	10514.9	149	0.122563	0.813115	0	1	10482.9	149	0.0763076	IFI27	14	P27; ISG12;	NM_005532.3	GeneID:3429		93645901
13353	cg13424446	0.85545	-99.9083	99.9083	1.02133e-10	-0.0224612	11292.1	149	0.10624	0.877911	0	1	11332.3	149	0.0705912	GGTLA4	20	MGC50550; dJ831C21.2;	NM_178311.1	GeneID:92086	20:23916273-23917531	23917432
21935	cg21961766	0.801805	-99.8871	99.8871	1.02634e-10	-0.0269514	4667.92	149	0.101119	0.828756	0	1	4738.17	149	0.063098	PRRG2	19	PRGP2;	NM_000951.1	GeneID:5639		54778190
4871	cg04810997	0.711975	-99.8661	99.8661	1.03132e-10	-0.0330827	4436.5	149	0.215505	0.745058	0	1	4353.67	149	0.162263	TAS2R60	7	T2R56; T2R60; MGC119154; MGC119155;	NM_177437.1	GeneID:338398		142850796
21641	cg21643191	0.697717	-99.8333	99.8333	1.03914e-10	-0.0338885	2577.47	149	0.141615	0.731605	0	1	2541.41	149	0.090969	ABCB5	7	ABCB5beta; EST422562;	NM_178559.3	GeneID:340273		20652513
12895	cg12955127	0.68624	-99.7181	99.7181	1.06707e-10	-0.0344899	6367.28	149	0.149255	0.72073	0	1	6401.01	149	0.0932664	ATP5F1	1	MGC24431;	NM_001688.3	GeneID:515		111792407
6191	cg06226384	0.571853	-99.7144	99.7144	1.06797e-10	-0.0390505	7665.34	149	0.186363	0.610904	0	1	7457.48	149	0.118437	CACNG5	17	MGC126656; MGC126682;	NM_145811.1	GeneID:27091		62303813
8838	cg08878744	0.620277	-99.6181	99.6181	1.09192e-10	-0.0374637	10069.4	149	0.1954	0.657741	0	1	10083.4	149	0.132178	LCE1B	1	LEP2; SPRL2A;	NM_178349.1	GeneID:353132		151050298
8461	cg08521225	0.795298	-99.6105	99.6105	1.09383e-10	-0.0274175	4723.06	149	0.117051	0.822716	0	1	4668.55	149	0.0700165	TTR	18	PALB; TBPA; HsT2651;	NM_000371.1	GeneID:7276		27425975
7579	cg07611925	0.799304	-99.5989	99.5989	1.09676e-10	-0.0271075	4278.67	149	0.114065	0.826412	0	1	4244.1	149	0.0544427	KCNE2	21	LQT5; LQT6; MIRP1; MGC138292;	NM_172201.1	GeneID:9992		34658253
23122	cg23152755	0.647608	-99.533	99.533	1.11353e-10	-0.0363271	3125.12	149	0.17147	0.683935	0	1	3082.9	149	0.106871	DEFB105A	8	BD-5; DEFB-5; DEFB105;	NM_152250.1	GeneID:245908		7333445
15981	cg15903837	0.717446	-99.4722	99.4722	1.12921e-10	-0.0326965	3367.56	149	0.121243	0.750142	0	1	3313.47	149	0.0821529	P2RY6	11	P2Y6; MGC15335;	NM_004154.3	GeneID:5031		72652644
13995	cg14034870	0.628165	-99.4159	99.4159	1.14397e-10	-0.0371198	5080.17	149	0.164065	0.665285	0	1	5007.18	149	0.103917	SFTPG	6	UNQ541; GSGL541;	NM_205854.1	GeneID:389376		31008176
22337	cg22375610	0.619112	-99.4159	99.4159	1.14397e-10	-0.0374692	10617.3	149	0.141928	0.656581	0	1	10477.2	149	0.0951457	APOBEC2	6	ARP1; ARCD1;	NM_006789.2	GeneID:10930		41129139
8481	cg08539093	0.828016	-99.3422	99.3422	1.16355e-10	-0.0247672	22024.4	149	0.0989234	0.852783	0	1	22024.1	149	0.0597743	OBP2B	9	hOBPIIb; MGC119022;	NM_014581.2	GeneID:29989		135074381
25021	cg25043279	0.762825	-99.3132	99.3132	1.17134e-10	-0.0297452	3909.34	149	0.13319	0.79257	0	1	3916.26	149	0.0846621	C7orf33	7		NM_145304.2	GeneID:202865		147918075
3690	cg03673470	0.740795	-99.2895	99.2895	1.17774e-10	-0.0312176	3064.97	149	0.139146	0.772013	0	1	3099.98	149	0.0874313	ZP4	1	ZBP; ZP1; ZPB;	NM_021186.2	GeneID:57829		236122052
26794	cg26822241	0.820971	-99.2823	99.2823	1.17968e-10	-0.0253415	6367.32	149	0.116984	0.846313	0	1	6407.7	149	0.0752487	CYP2C9	10	CPC9; CYP2C; CYP2C10; MGC88320; P450IIC9; P450 MP-4; P450 PB-1;	NM_000771.2	GeneID:1559		96687651
5228	cg05206587	0.50459	-99.204	99.204	1.20115e-10	-0.040228	2813.42	149	0.130182	0.544818	0	1	2796.64	149	0.0915926	GLRA2	X	GLR;	NM_002063.2	GeneID:2742		14457801
14596	cg14598387	0.538284	-99.0935	99.0935	1.23212e-10	-0.0396984	9418.25	149	0.171292	0.577982	0	1	9402.55	149	0.116621	OR1N1	9	OR1N3; OR1-26; OR9-22;	NM_012363.1	GeneID:138883		124329178
24145	cg24200059	0.149075	99.0339	99.0339	1.24913e-10	0.0264582	20130.2	149	0.126554	0.122617	0	1	19958.3	149	0.0832966	FLJ22222	17		NM_024648.1	GeneID:79701	17:77969048-77970215	77969264
922	cg00895324	0.629395	-98.9874	98.9874	1.26259e-10	-0.0369922	5586.77	149	0.171662	0.666387	0	1	5638.57	149	0.109246	PCP4	21	PEP-19;	NM_006198.2	GeneID:5121		40160387
17442	cg17412560	0.620753	-98.8715	98.8715	1.29673e-10	-0.0373073	3319.05	149	0.178383	0.658061	0	1	3292.92	149	0.11635	CSEN	2	DREAM; KCHIP3; KCNIP3; MGC18289;	NM_013434.3	GeneID:30818		95327130
27282	cg27345534	0.608193	-98.865	98.865	1.29867e-10	-0.0377634	2426.8	149	0.174845	0.645956	0	1	2380.89	149	0.116293	PRB2	12	Ps; cP7; PRPPRB1;	NM_006248.1	GeneID:440083		11400850
25207	cg25214346	0.885281	-98.8519	98.8519	1.30259e-10	-0.0195984	16506.2	149	0.0914491	0.904879	0	1	16403.3	149	0.0570056	NR1I3	1	CAR; CAR1; MB67; CAR-SV1; CAR-SV4; CAR-SV6; CAR-SV7; CAR-SV8; CAR-SV9; CAR-BETA; CAR-SV10; CAR-SV12; CAR-SV13; CAR-SV14; CAR-SV21;	NM_005122.2	GeneID:9970		159474590
7242	cg07265310	0.624353	-98.7779	98.7779	1.325e-10	-0.0371516	35468.5	149	0.163599	0.661505	0	1	35911.4	149	0.108365	K5B	12		NM_173352.1	GeneID:196374		51529189
23722	cg23760945	0.514865	-98.6853	98.6853	1.35354e-10	-0.039998	3425.27	149	0.164961	0.554863	0	1	3227.44	149	0.113989	ELOF1	19	MGC4549;	NM_032377.2	GeneID:84337		11526140
20327	cg20359349	0.560673	-98.6555	98.6555	1.36286e-10	-0.0391292	12679.4	149	0.188464	0.599802	0	1	12964.6	149	0.12781	2020-04-02	17		XR_000546.1	GeneID:23591		39350057
18982	cg18988110	0.627991	-98.6312	98.6312	1.37052e-10	-0.0369822	7504.43	149	0.166508	0.664973	0	1	7413.99	149	0.104989	ATAD4	17	MGC11242;	NM_024320.2	GeneID:79170		43390342
24559	cg24607398	0.583752	-98.6312	98.6312	1.37052e-10	-0.0385057	4272.04	149	0.168564	0.622258	0	1	4234.48	149	0.111189	MLH1	3	FCC2; COCA2; HNPCC; hMLH1; HNPCC2; MGC5172;	NM_000249.2	GeneID:4292		37008629
20951	cg20994561	0.884846	-98.6034	98.6034	1.37932e-10	-0.0196159	20211.1	149	0.0936517	0.904462	0	1	20342.8	149	0.0602484	BAI1	8		NM_001702.1	GeneID:575		143541402
3406	cg03386373	0.726087	-98.5814	98.5814	1.38632e-10	-0.0320322	3862.98	149	0.150343	0.758119	0	1	3833.59	149	0.0989815	SPATA3	2	TSARG1;	NM_139073.2	GeneID:130560		231568700
12766	cg12815916	0.921107	-98.5814	98.5814	1.38632e-10	-0.0160316	12009.1	149	0.0643978	0.937138	0	1	11929.4	149	0.0386902	PTPN18	2	BDP1;	NM_014369.2	GeneID:26469	2:130829416-130831123	130830902
8944	cg08999895	0.838683	-98.5553	98.5553	1.39468e-10	-0.0237733	10745.9	149	0.118184	0.862457	0	1	10547.4	149	0.0753907	SLC22A18AS	11	BWR1B; BWSCR1B; ORCTL2S; SLC22A1LS; p27-BWR1B;	NM_007105.1	GeneID:5003		2882445
19664	cg19686152	0.614185	-98.5126	98.5126	1.40846e-10	-0.0374816	17204.1	149	0.174616	0.651667	0	1	17366.7	149	0.108345	TMOD3	15	UTMOD;	NM_014547.3	GeneID:29766		49908834
26396	cg26414720	0.796527	-98.4584	98.4584	1.42613e-10	-0.0271689	4933.13	149	0.105455	0.823696	0	1	4983.41	149	0.0691594	MAGEA1	X	MAGE1; MGC9326;	NM_004988.3	GeneID:4100	X:152140654-152140921	152140656
15329	cg15329483	0.697457	-98.3881	98.3881	1.44939e-10	-0.0336612	4676.22	149	0.1456	0.731118	0	1	4490.37	149	0.0951016	SSX7	X		NM_173358.2	GeneID:280658		52700699
3241	cg03221436	0.762974	-98.348	98.348	1.46286e-10	-0.0295935	4306.95	149	0.145127	0.792568	0	1	4279.89	149	0.0972243	JM11	X		NM_033626.2	GeneID:90060		48803035
10342	cg10423860	0.596791	-98.2429	98.2429	1.49868e-10	-0.0380282	16179	149	0.191258	0.634819	0	1	16523	149	0.119308	CST5	20	MGC71922;	NM_001900.4	GeneID:1473		23808781
23304	cg23326301	0.826182	-98.1212	98.1212	1.54127e-10	-0.0247716	11869.1	149	0.094764	0.850954	0	1	11819.8	149	0.0599669	ADAM30	1	svph4;	NM_021794.2	GeneID:11085		120241335
9488	cg09546307	0.786306	-98.088	98.088	1.5531e-10	-0.027888	4406.35	149	0.112873	0.814194	0	1	4390.42	149	0.0731215	CLEC4D	12	MCL; Mpcl; CLEC-6; CLECSF8; MGC40078;	NM_080387.4	GeneID:338339	12:8556211-8556415	8556230
16527	cg16454349	0.750652	-98.0115	98.0115	1.58069e-10	-0.0303791	9365.91	149	0.142716	0.781031	0	1	9060.16	149	0.0919634	FLJ25410	16		NM_144605.1	GeneID:124404		4777890
6992	cg07007400	0.131029	97.9972	97.9972	1.58593e-10	0.024876	7570.14	149	0.10645	0.106153	0	1	7724.75	149	0.0673588	KRT7	12	K7; CK7; SCL; K2C7; MGC3625;	NM_005556.3	GeneID:3855	12:50912973-50913926	50913098
19927	cg19944367	0.87332	-97.9786	97.9786	1.59271e-10	-0.0206342	18331.9	149	0.100448	0.893954	0	1	18174.1	149	0.0673844	RGS3	9	C2PA; RGP3; FLJ20370; FLJ31516; FLJ90496; PDZ-RGS3;	NM_134427.1	GeneID:5998		115263596
25609	cg25612480	0.74597	-97.88	97.88	1.62928e-10	-0.0306671	17152.4	149	0.121743	0.776637	0	1	17376.2	149	0.0787133	UBE2V2	8	MMS2; UEV2; EDPF1; UEV-2; DDVIT1; EDAF-1; EDPF-1; DDVit-1;	NM_003350.2	GeneID:7336	8:49082930-49084059	49083013
17339	cg17307280	0.0819575	97.8506	97.8506	1.64036e-10	0.0205771	11515.1	149	0.0907892	0.0613804	0	1	11865.7	149	0.0544535	DRD1	5	DADR; DRD1A;	NM_000794.2	GeneID:1812	5:174803106-174805076	174804242
873	cg00848461	0.695982	-97.8351	97.8351	1.64622e-10	-0.0336498	5305.06	149	0.160167	0.729632	0	1	5375.33	149	0.114177	RAB24	5		NM_130781.1	GeneID:53917		176664699
10608	cg10705800	0.119471	97.694	97.694	1.70059e-10	0.0238773	15255.4	149	0.111002	0.0955939	0	1	15244.2	149	0.0695144	CITED4	1		NM_133467.2	GeneID:163732		41101007
14608	cg14606768	0.825049	-97.5912	97.5912	1.74134e-10	-0.0248008	4414.89	149	0.11292	0.84985	0	1	4492.92	149	0.0726288	C9	5		NM_001737.2	GeneID:735		39401572
23517	cg23566335	0.767489	-97.5459	97.5459	1.7596e-10	-0.0291651	25659.3	149	0.137839	0.796654	0	1	25649.5	149	0.0808477	ADAM18	8	ADAM27; tMDCIII; MGC41836; MGC88272;	NM_014237.1	GeneID:8749		39561504
23334	cg23355492	0.615724	-97.5281	97.5281	1.76681e-10	-0.037243	12534.7	149	0.175357	0.652967	0	1	12439.8	149	0.111156	SP6	17	KLF14; MGC119662; MGC119663; MGC119664; MGC119665;	NM_199262.2	GeneID:80320		43288592
25391	cg25412453	0.746682	-97.5038	97.5038	1.77674e-10	-0.0305636	17912.7	149	0.126618	0.777246	0	1	17837	149	0.0774625	DCST2	1	FLJ32934; RP11-307C12.4;	NM_144622.1	GeneID:127579		153272843
4415	cg04388983	0.110791	97.4441	97.4441	1.80131e-10	0.0231079	5089.29	149	0.0904175	0.0876834	0	1	5272.55	149	0.0531941	P2RY2	11	P2U; HP2U; P2U1; P2UR; P2Y2; P2RU1; P2Y2R; MGC20088; MGC40010;	NM_002564.2	GeneID:5029	11:72606620-72607619	72607492
25019	cg25041439	0.67039	-97.4383	97.4383	1.80371e-10	-0.0348998	4231.82	149	0.140639	0.70529	0	1	4207.06	149	0.0912101	HYLS1	11	FLJ32915;	NM_145014.1	GeneID:219844		125258320
1995	cg01970325	0.582492	-97.2801	97.2801	1.87066e-10	-0.0382823	7284.05	149	0.174516	0.620774	0	1	7469.56	149	0.108943	NELF	9	MGC125369; RP11-48C7.1;	NM_015537.3	GeneID:26012		139474062
12894	cg12954718	0.634768	-97.1406	97.1406	1.93171e-10	-0.0364382	17496.8	149	0.177366	0.671206	0	1	17707.9	149	0.11069	USP6	17	HRP1; TRE2; TRE17; Tre-2;	NM_004505.1	GeneID:9098		4972090
17524	cg17500962	0.700626	-97.1359	97.1359	1.93382e-10	-0.0332803	3739.23	149	0.151332	0.733906	0	1	3706.93	149	0.102292	C16orf47	16	FLJ26184;	NM_207385.1	GeneID:388289		71736452
18626	cg18623836	0.644923	-97.1297	97.1297	1.93656e-10	-0.0360112	4209.88	149	0.176648	0.680935	0	1	4249.76	149	0.114076	RRM2	2	R2; RR2M;	NM_001034.1	GeneID:6241	2:10179345-10181140	10179358
15951	cg15875314	0.623802	-97.0442	97.0442	1.97506e-10	-0.0368519	2994.34	149	0.178216	0.660654	0	1	3031.41	149	0.124058	DDX4	5	VASA; MGC111074;	NM_024415.1	GeneID:54514		55070954
15797	cg15758700	0.627673	-97.0392	97.0392	1.97735e-10	-0.0367011	2495.06	149	0.168487	0.664374	0	1	2487.65	149	0.110263	FLJ36004	12	Pas1c1;	NM_152590.1	GeneID:160492		25598934
7715	cg07747336	0.709125	-96.9968	96.9968	1.99673e-10	-0.0327802	5257.4	149	0.148291	0.741905	0	1	5373.17	149	0.0972468	C11orf38	11	UNQ3112;	NM_212555.1	GeneID:399967		125154608
999	cg00962459	0.769138	-96.8582	96.8582	2.06149e-10	-0.0289512	13789.2	149	0.120167	0.798089	0	1	13818.2	149	0.0741037	PROKR1	2	ZAQ; PKR1; GPR73; GPR73a;	NM_138964.2	GeneID:10887		68725146
21505	cg21518208	0.592888	-96.8049	96.8049	2.08692e-10	-0.0378789	7066.76	149	0.165675	0.630766	0	1	6771.91	149	0.106171	KRTHB5	12	HB5; Hb-5; hHb5;	NM_002283.2	GeneID:3891		51047683
563	cg00544557	0.860746	-96.7076	96.7076	2.13421e-10	-0.0216444	16713.9	149	0.0998665	0.88239	0	1	16702.6	149	0.0626782	DSCR10	21		NM_148676.1	GeneID:259234		38500612
20355	cg20383064	0.784817	-96.671	96.671	2.15231e-10	-0.0278035	4402.35	149	0.133861	0.81262	0	1	4394.55	149	0.084269	BFSP2	3	CP47; CP49; LIFL-L;	NM_003571.2	GeneID:8419		134600110
20906	cg20951539	0.684948	-96.5762	96.5762	2.19977e-10	-0.0340234	2972	149	0.194461	0.718971	0	1	2894.85	149	0.126199	PXT1	6	STEPP;	NM_152990.2	GeneID:222659		36475797
18972	cg18982568	0.71007	-96.563	96.563	2.20649e-10	-0.0326561	2970.41	149	0.172052	0.742726	0	1	3044.3	149	0.115646	KRT1B	12		NM_175078.1	GeneID:374454		51383436
14162	cg14182690	0.701156	-96.4799	96.4799	2.24912e-10	-0.0331425	8868.47	149	0.159538	0.734298	0	1	8893.58	149	0.108703	RUNX3	1	AML2; CBFA3; PEBP2aC;	NM_004350.1	GeneID:864	1:25163450-25163764	25163534
4428	cg04398978	0.267576	96.4702	96.4702	2.25415e-10	0.0338369	8277.56	149	0.149655	0.233739	0	1	8373.9	149	0.0939245	CBX4	17	PC2; hPC2; NBP16;	NM_003655.2	GeneID:8535	17:75426048-75430463	75428659
15590	cg15582789	0.251476	96.435	96.435	2.27246e-10	0.0329613	6546.29	149	0.136298	0.218515	0	1	6411.18	149	0.0905873	SLC35D2	9	hfrc; HFRC1; SQV7L; UGTrel8; MGC117215;	NM_007001.1	GeneID:11046	9:98185223-98186088	98185346
5936	cg05942970	0.891738	-96.4293	96.4293	2.27544e-10	-0.0187559	16147.7	149	0.0919473	0.910493	0	1	16366.8	149	0.0660331	C10orf39	10	FLJ37857;	NM_194303.1	GeneID:282973	10:133805370-133805647	133805517
20166	cg20191453	0.406577	96.4109	96.4109	2.28511e-10	0.0389456	15183.4	149	0.171634	0.367631	0	1	15445	149	0.119855	AMT	3	GCE; NKH; GCST;	NM_000481.2	GeneID:275	3:49434750-49435011	49434859
11283	cg11346450	0.782668	-96.373	96.373	2.30516e-10	-0.0279179	9171.85	149	0.122293	0.810586	0	1	8886.4	149	0.0817775	UGT1A3	2	UGT1C; UGT1*3;	NM_019093.2	GeneID:54659		234302782
16245	cg16177830	0.619248	-96.2804	96.2804	2.35482e-10	-0.0368803	3053.01	149	0.177153	0.656128	0	1	2971.29	149	0.118461	TNFRSF17	16	BCM; BCMA; CD269;	NM_001192.2	GeneID:608		11966520
15047	cg15046693	0.546334	-96.2565	96.2565	2.36782e-10	-0.0389741	16164.6	149	0.145863	0.585308	0	1	16404.4	149	0.0972377	CEBPG	19	GPE1BP; IG/EBP-1;	NM_001806.2	GeneID:1054	19:38554952-38557513	38555716
12742	cg12795208	0.885301	-96.1254	96.1254	2.44039e-10	-0.0193369	17005.1	149	0.0873073	0.904638	0	1	17261.2	149	0.057091	KRT6B	12	K6B; PC2; CK6B; KRTL1;	NM_005555.2	GeneID:3854		51132205
17130	cg17095797	0.608429	-96.0481	96.0481	2.48424e-10	-0.0372239	9997.53	149	0.170015	0.645653	0	1	10151.6	149	0.122942	FOXL1	16	FKH6; FKHL11; FREAC7;	NM_005250.1	GeneID:2300		85169514
18868	cg18881269	0.887928	-96.03	96.03	2.49457e-10	-0.0190803	17957	149	0.0846124	0.907008	0	1	18100.7	149	0.0469775	LEPREL2	12	GRCB; P3H3; HSU47926;	NM_014262.2	GeneID:10536		6806528
19379	cg19391527	0.631429	-95.9993	95.9993	2.51229e-10	-0.0363612	8028.4	149	0.188108	0.66779	0	1	7947.13	149	0.119191	PNOC	8	PPNOC;	NM_006228.2	GeneID:5368		28229651
4928	cg04879235	0.810594	-95.9221	95.9221	2.55735e-10	-0.0257507	20303.6	149	0.124786	0.836345	0	1	20311.8	149	0.0864806	PPY	17	PNP;	NM_002722.2	GeneID:5539		39374388
16300	cg16232126	0.118581	95.9109	95.9109	2.56395e-10	0.0235932	10591.7	149	0.10295	0.0949874	0	1	11009.6	149	0.0681178	SLC5A7	2	CHT; CHT1; hCHT;	NM_021815.2	GeneID:60482	2:107969161-107970056	107969437
6973	cg06985415	0.851986	-95.8487	95.8487	2.60096e-10	-0.0223213	21521.8	149	0.103511	0.874308	0	1	21475.2	149	0.0766564	C10orf39	10	FLJ37857;	NM_194303.1	GeneID:282973	10:133805370-133805647	133805401
24190	cg24244000	0.739328	-95.8226	95.8226	2.61659e-10	-0.0307784	4783.45	149	0.18552	0.770106	0	1	4731.66	149	0.118554	GABRG3	15		NM_033223.1	GeneID:2567		25343930
9343	cg09419670	0.229175	-95.7826	95.7826	2.64082e-10	-0.0334587	15244.8	149	0.131814	0.262634	0	1	15460.2	149	0.136211	PSMD5	9	S5B; KIAA0072; MGC23145;	NM_005047.2	GeneID:5711	9:122644694-122645875	122645487
10432	cg10517312	0.576315	-95.685	95.685	2.70084e-10	-0.0381444	6318.68	149	0.173675	0.61446	0	1	6405.6	149	0.116024	RNF36	15	Trif;	NM_080745.2	GeneID:140691		42814545
19546	cg19554294	0.657126	-95.685	95.685	2.70084e-10	-0.0352127	5572.74	149	0.160112	0.692339	0	1	5602.54	149	0.107312	VN1R2	19	V1RL2;	NM_173856.1	GeneID:317701		58453680
26838	cg26861460	0.360264	95.685	95.685	2.70084e-10	0.0375803	4942.49	149	0.155755	0.322684	0	1	5076.27	149	0.117297	PARVG	22		NM_022141.4	GeneID:64098		42906788
105	cg00095526	0.741595	-95.6405	95.6405	2.72868e-10	-0.0306059	18235.7	149	0.15264	0.7722	0	1	18011.9	149	0.100317	CACNA1S	1	MHS5; HOKPP; hypoPP; CCHL1A3; CACNL1A3;	NM_000069.1	GeneID:779		199348309
3944	cg03905144	0.659292	-95.4911	95.4911	2.82415e-10	-0.0350799	4149.95	149	0.183347	0.694372	0	1	4217.66	149	0.114625	MPDZ	9	MUPP1; FLJ25909; DKFZp781P216;	NM_003829.1	GeneID:8777		13239504
17301	cg17266238	0.801843	-95.4363	95.4363	2.86005e-10	-0.0263634	13392.5	149	0.116928	0.828206	0	1	13548.4	149	0.0731517	C21orf94	21		NM_145180.2	GeneID:246705		28306927
27195	cg27257408	0.797537	-95.4328	95.4328	2.86234e-10	-0.026689	11269.5	149	0.0999894	0.824226	0	1	11341.8	149	0.064273	ACSBG1	15	BG1; BGM; hBG1; hsBG; GR-LACS; FLJ30320; KIAA0631; MGC14352;	NM_015162.3	GeneID:23205		76313891
6345	cg06378617	0.711363	-95.3813	95.3813	2.89648e-10	-0.0323871	4104.62	149	0.168356	0.74375	0	1	4020.69	149	0.105793	KRT23	17	K23; CK23; HAIK1; MGC26158; DKFZP434G032;	NM_015515.3	GeneID:25984		36348667
17502	cg17474651	0.74155	-95.3488	95.3488	2.91821e-10	-0.0305638	4720.87	149	0.138791	0.772114	0	1	4765.03	149	0.095569	MAGEC3	X	HCA2; MAGEC4; MAGE-C3; MGC119270; MGC119271;	NM_138702.1	GeneID:139081		140752860
6340	cg06374075	0.114423	95.2638	95.2638	2.97594e-10	0.0231673	30002.1	149	0.104697	0.091256	0	1	29746.5	149	0.0633304	ADAM11	17	MDC;	NM_002390.3	GeneID:4185	17:40191182-40192471	40192457
22026	cg22059008	0.761556	-95.0067	95.0067	3.15741e-10	-0.0292027	16683.6	149	0.127935	0.790759	0	1	16790.2	149	0.083058	TESSP1	16		XR_001519.1	GeneID:360226	16:2788298-2789206	2788313
7005	cg07017706	0.771962	-94.8104	94.8104	3.30339e-10	-0.0284604	15073	149	0.125437	0.800422	0	1	14834.3	149	0.0791823	K6IRS3	12	KRT6IRS3; MGC129635; MGC129636;	NM_175068.2	GeneID:319101		51299598
24618	cg24654350	0.754993	-94.7279	94.7279	3.36672e-10	-0.0296012	12130.7	149	0.111793	0.784594	0	1	12167.1	149	0.0661846	KIR3DL1	19	KIR; CL-2; NKB1; AMB11; CL-11; NKAT3; NKB1B; KIR-G1; NKAT10; CD158E1; CD158E2; KIR3DS1; CD158E1/2; MGC119726; MGC119728; MGC126589; MGC126591; KIR3DL1/2V;	NM_013289.1	GeneID:3811		60020679
11267	cg11328541	0.623238	-94.6371	94.6371	3.43785e-10	-0.0364264	3430.98	149	0.186102	0.659665	0	1	3387.19	149	0.118843	OR7C1	19	OR7C4; OR19-5; TPCR86; HSTPCR86P; CIT-HSP-146E8;	NM_198944.1	GeneID:26664		14771889
13016	cg13088755	0.672832	-94.538	94.538	3.51723e-10	-0.0342774	3531.44	149	0.170482	0.707109	0	1	3505.5	149	0.111762	P2RY10	X	P2Y10;	NM_014499.2	GeneID:27334		78086697
3187	cg03160135	0.143361	94.519	94.519	3.53263e-10	0.025431	23399.9	149	0.125884	0.11793	0	1	23174.5	149	0.0784323	VGLL2	6	VGL2; VITO1;	NM_153453.1	GeneID:245806	6:117692316-117694016	117693611
17111	cg17078393	0.484579	-94.4442	94.4442	3.59398e-10	-0.0394327	5048.17	149	0.154364	0.524012	0	1	5018.05	149	0.11334	LCK	1		NM_005356.2	GeneID:3932	1:32489393-32489639	32489589
10158	cg10235741	0.798377	-94.182	94.182	3.81773e-10	-0.0264619	6102.72	149	0.116686	0.824839	0	1	6045.13	149	0.074226	DNASE1L3	3	LSD; DHP2; DNAS1L3;	NM_004944.2	GeneID:1776		58175366
4416	cg04389838	0.27866	94.1588	94.1588	3.83812e-10	0.034004	18451.6	149	0.157516	0.244656	0	1	18895.7	149	0.103124	ZNF501	3	ZNF; MGC21738;	NM_145044.1	GeneID:115560	3:44745791-44746449	44745855
22848	cg22881914	0.0632445	94.1141	94.1141	3.87784e-10	0.0184695	18619.8	149	0.0786585	0.044775	0	1	18935	149	0.0490294	NID2	14		NM_007361.2	GeneID:22795	14:51604216-51606602	51605897
23681	cg23719124	0.41266	-94.0255	94.0255	3.95776e-10	-0.0391865	14398.7	149	0.179429	0.451846	0	1	14904.2	149	0.189986	GSTM5	1	GTM5; GSTM5-5;	NM_000851.2	GeneID:2949	1:110056117-110056501	110056442
2103	cg02075593	0.727965	-94.0083	94.0083	3.97351e-10	-0.031197	3145.8	149	0.157042	0.759162	0	1	3190.23	149	0.108651	GSTA3	6	GTA3; GSTA3-3; MGC22232;	NM_000847.3	GeneID:2940		52881670
19335	cg19345602	0.540161	-93.9245	93.9245	4.05084e-10	-0.0386326	4011.66	149	0.159493	0.578793	0	1	3938.81	149	0.106166	PATE	11		NM_138294.2	GeneID:160065		125120598
12351	cg12432709	0.755614	-93.878	93.878	4.09445e-10	-0.0294338	5398.42	149	0.136556	0.785048	0	1	5401.99	149	0.0858472	CCDC68	18	SE57-1;	NM_025214.1	GeneID:80323		50778331
24161	cg24216701	0.932836	-93.8392	93.8392	4.13124e-10	-0.0144746	17852.4	149	0.0674386	0.947311	0	1	17630.6	149	0.0427947	CDX1	5		NM_001804.1	GeneID:1044	5:149526038-149527543	149526121
6297	cg06324671	0.836275	-93.8077	93.8077	4.16134e-10	-0.0234223	9845.88	149	0.0942637	0.859697	0	1	9923.52	149	0.0674534	KRTAP19-7	21	KAP19.7; MGC118928;	NM_181614.1	GeneID:337974		30855382
2485	cg02490034	0.400353	93.766	93.766	4.20143e-10	0.038287	22578.7	149	0.160621	0.362066	0	1	23092.9	149	0.11558	MEST	7	PEG1; MGC8703; MGC111102; DKFZp686L18234;	NM_177524.1	GeneID:4232	7:129912883-129914215	129913072
12449	cg12530080	0.613265	-93.6916	93.6916	4.27408e-10	-0.0366114	2991.39	149	0.16474	0.649876	0	1	2924.89	149	0.115831	PMCHL1	5		NM_031887.2	GeneID:5369		22177396
19538	cg19546781	0.873074	-93.6516	93.6516	4.31358e-10	-0.0202197	23446.3	149	0.0948026	0.893294	0	1	23210.3	149	0.0589971	CCL17	16	TARC; ABCD-2; SCYA17; A-152E5.3;	NM_002987.2	GeneID:6361		55996216
27356	cg27420123	0.666238	-93.6516	93.6516	4.31358e-10	-0.0344345	8913.35	149	0.168341	0.700673	0	1	9071.62	149	0.106411	FSHB	11		NM_000510.2	GeneID:2488		30208049
1936	cg01917648	0.759715	-93.6181	93.6181	4.34704e-10	-0.0291219	4906.59	149	0.137006	0.788837	0	1	4952.34	149	0.0952826	SPIC	12	SPI-C; MGC40611;	NM_152323.1	GeneID:121599		100395468
11090	cg11170796	0.750393	-93.5608	93.5608	4.4047e-10	-0.029726	7698.02	149	0.128357	0.780119	0	1	7471.14	149	0.0810727	TCF3	19	E2A; ITF1;	NM_003200.1	GeneID:6929		1601224
17529	cg17504145	0.734197	-93.4795	93.4795	4.48799e-10	-0.0307339	4609.07	149	0.13006	0.764931	0	1	4562.93	149	0.0844564	CRYBB2	22	CCA2; CRYB2; CRYB2A; D22S665;	NM_000496.1	GeneID:1415		23947229
208	cg00187380	0.166522	93.4416	93.4416	4.52729e-10	0.027036	14037.1	149	0.115738	0.139486	0	1	14016.7	149	0.0772524	HOXC5	12	CP11; HOX3; HOX3D;	NM_018953.2	GeneID:3222	12:52712802-52715131	52713651
2805	cg02803836	0.910754	-93.434	93.434	4.5352e-10	-0.0166544	19146.6	149	0.0683688	0.927408	0	1	19107	149	0.0395979	MGMT	10		NT_008818.15	GeneID:4255	10:131302456-131302963	131302497
2575	cg02579133	0.746641	-93.2743	93.2743	4.70511e-10	-0.0299237	3906.2	149	0.145944	0.776565	0	1	3850.12	149	0.0945705	KRTAP10-8	21	KAP10.8; KRTAP18-8; KRTAP18.8;	NM_198695.1	GeneID:386681		44856169
12163	cg12232274	0.131671	93.2659	93.2659	4.71419e-10	0.0243482	13965.7	149	0.102377	0.107322	0	1	14139.4	149	0.0640936	LRP11	6	MANSC3; FLJ14735; MGC39092; bA350J20.3;	NM_032832.3	GeneID:84918	6:150225936-150227697	150227547
6233	cg06264060	0.846464	-93.2595	93.2595	4.72116e-10	-0.0225044	6650.77	149	0.0985435	0.868968	0	1	6705.12	149	0.0635453	GPR24	22	SLC1; MCHR1; MGC32129;	NM_005297.2	GeneID:2847		39404953
21449	cg21466821	0.724806	-93.2595	93.2595	4.72116e-10	-0.0312636	23400.6	149	0.151294	0.756069	0	1	22881.5	149	0.0995012	HIPK4	19	FLJ32818;	NM_144685.3	GeneID:147746		45588013
14232	cg14260458	0.676264	-93.254	93.254	4.72718e-10	-0.033884	4602.04	149	0.167827	0.710147	0	1	4593.38	149	0.110744	OCM	7	OM; ONCM;	NM_006188.2	GeneID:4951		97458059
16541	cg16473288	0.733034	-93.252	93.252	4.72932e-10	-0.0307674	3277.66	149	0.136393	0.763801	0	1	3227.12	149	0.0918493	OR1N1	9	OR1N3; OR1-26; OR9-22;	NM_012363.1	GeneID:138883		124329941
19731	cg19756068	0.652584	-93.2214	93.2214	4.76276e-10	-0.0349719	8776.05	149	0.14633	0.687555	0	1	8726.26	149	0.0896289	CYP2B6	19	CPB6; IIB1; P450; CYP2B; CYPIIB6;	NM_000767.4	GeneID:1555		46189062
24967	cg24995836	0.156278	93.2164	93.2164	4.76828e-10	0.0262466	11684.6	149	0.153437	0.130031	0	1	11894.2	149	0.117266	GABRA3	X	MGC33793;	NM_000808.2	GeneID:2556		151370046
15579	cg15569340	0.0696537	93.1028	93.1028	4.89465e-10	0.0189719	18124	149	0.0853552	0.0506818	0	1	18214.7	149	0.0551916	RBP5	12	CRBP3; CRBPIII; CRBP-III;	NM_031491.1	GeneID:83758	12:7173487-7173885	7173757
13893	cg13929328	0.120465	93.0297	93.0297	4.97776e-10	0.0234088	23395.1	149	0.107017	0.0970562	0	1	23365	149	0.0644132	FLJ46831	10	FOXI2;	NM_207426.1	GeneID:399823	10:129424072-129426344	129425888
15331	cg15329866	0.708253	-92.9673	92.9673	5.04969e-10	-0.0321649	2565.3	149	0.163093	0.740418	0	1	2581.41	149	0.106698	PLD1	3		NM_002662.2	GeneID:5337		172938520
12676	cg12731488	0.622857	-92.962	92.962	5.05591e-10	-0.0361237	2212	149	0.143292	0.65898	0	1	2186.66	149	0.0901646	SYTL5	X	slp5;	NM_138780.1	GeneID:94122		37778155
12786	cg12836863	0.425822	92.7948	92.7948	5.25439e-10	0.0385804	8953.67	149	0.171318	0.387241	0	1	8927.37	149	0.121964	BRCA2	13	FAD; FACD; FAD1; BRCC2; FANCB; FANCD; FANCD1;	NM_000059.1	GeneID:675	13:31786608-31787134	31787023
3003	cg02992632	0.108704	92.7908	92.7908	5.25917e-10	0.0223999	9051.24	149	0.0974538	0.0863042	0	1	9021.08	149	0.0597707	FGF12	3	FHF1; FGF12B;	NM_021032.2	GeneID:2257	3:193927501-193928340	193928074
9498	cg09551916	0.661968	-92.7773	92.7773	5.27553e-10	-0.0344729	6827.32	149	0.182447	0.696441	0	1	6733.1	149	0.113574	CFHR2	1	FHR2; HFL3; CFHL2;	NM_005666.2	GeneID:3080		195178511
3131	cg03109701	0.680991	-92.739	92.739	5.3223e-10	-0.03356	9409.15	149	0.175623	0.714551	0	1	9713.93	149	0.109262	TMEM118	12	FLJ14627;	NM_032814.1	GeneID:84900		115659141
16348	cg16270890	0.0956173	92.6874	92.6874	5.38593e-10	0.0212641	13655.2	149	0.0975597	0.0743532	0	1	13736.5	149	0.0606621	FAHD1	16	YISKL; C16orf36; MGC74876; DKFZp566J2046;	NM_031208.1	GeneID:81889	16:1815691-1818302	1815964
8308	cg08356693	0.617255	-92.6832	92.6832	5.39118e-10	-0.0362744	2575.51	149	0.164031	0.653529	0	1	2536.73	149	0.11953	ITLN1	1	LFR; HL-1; ITLN; hIntL; omentin; FLJ20022;	NM_017625.2	GeneID:55600		159121824
14940	cg14930674	0.855615	-92.5351	92.5351	5.57813e-10	-0.0216399	11330.4	149	0.0955697	0.877255	0	1	11433.7	149	0.0596714	SLC12A1	15	BSC1; NKCC2; MGC48843;	NM_000338.1	GeneID:6557		46287532
4941	cg04891836	0.420258	-92.4514	92.4514	5.68663e-10	-0.038929	20943.6	149	0.140823	0.459187	0	1	21451.2	149	0.094172	TNFSF14	19	LTg; TR2; CD258; HVEML; LIGHT;	NM_003807.2	GeneID:8740		6621390
20365	cg20395892	0.122168	92.4142	92.4142	5.73564e-10	0.0234742	16848.4	149	0.100262	0.0986941	0	1	17101.9	149	0.0615502	IRAK3	12	IRAK-M;	NM_007199.1	GeneID:11213	12:64868542-64869736	64869047
24942	cg24975222	0.0618059	92.211	92.211	6.01031e-10	0.018156	18814.5	149	0.0769004	0.04365	0	1	18865.8	149	0.0487189	CDCP1	3	CD318; TRASK; SIMA135;	NM_178181.1	GeneID:64866	3:45161842-45163260	45162721
8090	cg08124030	0.732267	-92.168	92.168	6.0702e-10	-0.0306421	5294.63	149	0.124268	0.762909	0	1	5349.24	149	0.105029	TM4SF1	3	L6; H-L6; M3S1; TAAL6;	NM_014220.2	GeneID:4071	3:150577836-150578057	150577973
2478	cg02477931	0.730028	-92.1654	92.1654	6.07378e-10	-0.030776	4294.08	149	0.118676	0.760804	0	1	4252.67	149	0.0772226	C11orf39	11	FLJ45436;	NM_207432.1	GeneID:399980		131037931
14311	cg14324838	0.833117	-92.0139	92.0139	6.28945e-10	-0.0234648	7892.31	149	0.110053	0.856582	0	1	7680.82	149	0.0704869	EPB41L1	20	4.1N; KIAA0338; MGC11072;	NM_012156.2	GeneID:2036		34164089
24899	cg24926276	0.397641	92.0139	92.0139	6.28945e-10	0.0378731	10832.1	149	0.138323	0.359768	0	1	11159.9	149	0.103601	LRG1	19	LRG; HMFT1766;	NM_052972.2	GeneID:116844		4490943
2320	cg02280309	0.787836	-91.9504	91.9504	6.38206e-10	-0.0269291	8928.32	149	0.10663	0.814765	0	1	8938.3	149	0.0699332	PKLR	1	PK1; PKL; RPK;	NM_000298.3	GeneID:5313		153537584
18691	cg18680834	0.598177	-91.7626	91.7626	6.66415e-10	-0.0367412	4150.61	149	0.181017	0.634918	0	1	4120.38	149	0.11986	ZNF536	19	KIAA0390;	NM_014717.1	GeneID:9745		35555189
14025	cg14059963	0.877565	-91.7541	91.7541	6.67707e-10	-0.0196206	13526.9	149	0.0838839	0.897185	0	1	13270	149	0.0509061	GPR19	12		NM_006143.1	GeneID:2842	12:12706085-12706362	12706293
1889	cg01869233	0.616528	-91.6266	91.6266	6.87608e-10	-0.0361016	8847.06	149	0.145958	0.65263	0	1	8682.54	149	0.0950347	C20orf75	20	NLRR4; FLJ23994; MGC25027; dJ1056H1.1;	NM_152611.2	GeneID:164312		5983139
1462	cg01446393	0.630253	-91.5666	91.5666	6.97172e-10	-0.0355836	2399.8	149	0.169054	0.665837	0	1	2297.79	149	0.114158	FAM107A	3	DRR1; TU3A;	NM_007177.1	GeneID:11170		58538649
15119	cg15121304	0.696686	-91.5499	91.5499	6.9985e-10	-0.0325529	27590.9	149	0.146263	0.729239	0	1	27769.3	149	0.0965143		22			GeneID:3535		20710100
6141	cg06189133	0.873656	-91.5248	91.5248	7.03911e-10	-0.0199484	16984.8	149	0.0942994	0.893604	0	1	16600.5	149	0.0629617	INSL3	19	RLF; RLNL; MGC119818; MGC119819;	NM_005543.2	GeneID:3640	19:17792758-17793397	17792995
395	cg00392257	0.721337	-91.4812	91.4812	7.11019e-10	-0.0311779	14378.3	149	0.142871	0.752515	0	1	14356.6	149	0.0977487	ISG20L2	1	FLJ12671;	NM_030980.1	GeneID:81875		154963371
2954	cg02946850	0.698894	-91.4386	91.4386	7.18029e-10	-0.0324166	6495.33	149	0.14419	0.73131	0	1	6442.39	149	0.0867087	GRM8	7	GLUR8; mGlu8; GPRC1H; MGLUR8; MGC126724;	NM_000845.1	GeneID:2918	7:126670007-126670217	126670180
9134	cg09195271	0.697814	-91.3486	91.3486	7.33059e-10	-0.0324587	12294.4	149	0.123793	0.730272	0	1	12140.2	149	0.0907504	RNF186	1	FLJ20225; RP11-91K11.1;	NM_019062.1	GeneID:54546		20015084
7087	cg07086380	0.565871	-91.3367	91.3367	7.35067e-10	-0.0375553	7188.69	149	0.171366	0.603426	0	1	7279.05	149	0.114292	TNFAIP8	5	GG2-1; SCC-S2; MDC-3.13;	NM_014350.1	GeneID:25816	5:118718928-118720025	118718932
8553	cg08611714	0.653521	-91.3308	91.3308	7.36071e-10	-0.0345868	11774.7	149	0.187587	0.688108	0	1	11588.5	149	0.116579	KRTHA2	17	HA2; Ha-2; hHa2;	NM_002278.2	GeneID:3882		36877384
23303	cg23326197	0.539724	-91.3277	91.3277	7.3659e-10	-0.0381101	5703.96	149	0.164611	0.577834	0	1	5659.69	149	0.107531	CYP3A4	7	HLP; CP33; CP34; CYP3A; NF-25; CYP3A3; P450C3; P450PCN1; MGC126680;	NM_017460.3	GeneID:1576		99220306
6471	cg06493386	0.136389	91.3274	91.3274	7.36641e-10	0.0244756	19530.2	149	0.110577	0.111913	0	1	19563.7	149	0.0639937	TRPA1	8	ANKTM1;	NM_007332.1	GeneID:8989	8:73149852-73150676	73150351
24088	cg24130010	0.190325	91.3274	91.3274	7.36641e-10	0.028396	7148.4	149	0.145065	0.161929	0	1	7026.01	149	0.0929016	CHODL	21	MT75; PRED12; C21orf68; FLJ12627;	NM_024944.2	GeneID:140578	21:18538786-18539779	18539047
2133	cg02105856	0.714697	-91.2665	91.2665	7.47045e-10	-0.0315204	5277.1	149	0.151403	0.746217	0	1	5218.01	149	0.0977878	PIGR	1		NM_002644.2	GeneID:5284		205186407
21811	cg21831174	0.613985	-91.2643	91.2643	7.47434e-10	-0.0361182	2202.24	149	0.15439	0.650103	0	1	2171.6	149	0.104063	MASP1	3	MASP; RaRF; CRARF; PRSS5; CRARF1; FLJ26383; MGC126283; MGC126284; DKFZp686I01199;	NM_001879.4	GeneID:5648		188493881
25824	cg25843439	0.458075	-91.2139	91.2139	7.56152e-10	-0.0388361	11544.6	149	0.151947	0.496911	0	1	11704.4	149	0.104729	OR10H3	19		NM_013938.1	GeneID:26532		15713574
16518	cg16440909	0.63573	-91.2134	91.2134	7.56237e-10	-0.0353001	2421.96	149	0.182235	0.67103	0	1	2335.55	149	0.128029	CXorf6	X	CG1; F18;	NM_005491.1	GeneID:10046		149364403
10994	cg11070419	0.619369	-91.0865	91.0865	7.78671e-10	-0.0358937	2752.51	149	0.172359	0.655262	0	1	2679.86	149	0.111076	C4BPA	1	PRP; C4BP;	NM_000715.3	GeneID:722		205343833
16239	cg16175725	0.900549	-91.0797	91.0797	7.79882e-10	-0.0174292	9803.24	149	0.0776851	0.917978	0	1	9679.22	149	0.0489893	TCF1	12	HNF1; LFB1; HNF1A; MODY3;	NM_000545.3	GeneID:6927	12:119901088-119901290	119901179
23963	cg24010336	0.581348	-91.0653	91.0653	7.82471e-10	-0.0370968	9263.14	149	0.173059	0.618445	0	1	9001.28	149	0.118598	FBXO17	19	FBG4; Fbx17; FBXO26; MGC9379; FLJ11798; FLJ25205;	NM_024907.5	GeneID:115290	19:44159079-44159662	44159098
18932	cg18942631	0.67678	-91.0386	91.0386	7.87307e-10	-0.0334653	12575.6	149	0.187809	0.710245	0	1	12381	149	0.121137	CASQ2	1	PDIB2;	NM_001232.1	GeneID:845		116112864
22390	cg22418909	0.123956	91.0342	91.0342	7.88092e-10	0.0234498	20757.2	149	0.103256	0.100506	0	1	20343.3	149	0.0666781	SFRP1	8	FRP; FRP1; FrzA; FRP-1; SARP2;	NM_003012.3	GeneID:6422	8:41284820-41286784	41285895
15807	cg15765694	0.680473	-91.0171	91.0171	7.91199e-10	-0.0332809	3941.41	149	0.133228	0.713754	0	1	3871.68	149	0.0902024	PPP3R2	9	PPP3RL;	NM_147180.2	GeneID:5535		103397922
26285	cg26294551	0.71364	-90.9674	90.9674	8.00311e-10	-0.031528	3718.89	149	0.148424	0.745168	0	1	3844.89	149	0.101189	GP5	3	CD42d;	NM_004488.1	GeneID:2814	3:195601936-195602149	195602116
18503	cg18490846	0.692921	-90.9668	90.9668	8.00426e-10	-0.0326444	6329.2	149	0.165778	0.725565	0	1	6225.63	149	0.110077	C17orf73	17	FLJ20694;	NM_017928.1	GeneID:55018		46200721
5307	cg05292376	0.718394	-90.9179	90.9179	8.0948e-10	-0.0312503	17556.7	149	0.118733	0.749644	0	1	17449.8	149	0.0707021	AATK	17		XM_927215.1	GeneID:9625		76709831
3362	cg03349935	0.859232	-90.8882	90.8882	8.15035e-10	-0.0211437	15655.4	149	0.0986629	0.880375	0	1	15360.3	149	0.0671694	RASL12	15	RIS;	NM_016563.2	GeneID:51285		63148388
15007	cg15005385	0.558655	-90.7748	90.7748	8.3661e-10	-0.0376061	4222.81	149	0.163156	0.596261	0	1	4201.86	149	0.107802	CCL3L1	17	LD78; 464.2; SCYA3L; G0S19-2; SCYA3L1; D17S1718; LD78BETA; MGC12815; MGC104178;	NM_021006.4	GeneID:6349		31650167
7387	cg07412254	0.691821	-90.7656	90.7656	8.38372e-10	-0.032666	13332.5	149	0.135953	0.724487	0	1	13325.5	149	0.0982086	FLJ14816	2		NM_032845.1	GeneID:84931	2:120939973-120940445	120940004
4130	cg04081402	0.876459	-90.7155	90.7155	8.4811e-10	-0.0196112	10888.2	149	0.0912114	0.89607	0	1	10856.1	149	0.0558881	TCN2	22	TC2; D22S676; D22S750;	NM_000355.2	GeneID:6948		29333587
26796	cg26823505	0.518447	-90.7155	90.7155	8.4811e-10	-0.0383196	7261.36	149	0.167534	0.556767	0	1	6860.96	149	0.112587	CLPS	6		NM_001832.2	GeneID:1208		35873567
19047	cg19047670	0.821383	-90.639	90.639	8.63173e-10	-0.024228	12070.3	149	0.101874	0.845611	0	1	12131.7	149	0.062027	CCND1	11	BCL1; PRAD1; U21B31; D11S287E; cyclin D1;	NT_078088.3	GeneID:595	11:69170075-69170635	69170632
10253	cg10324224	0.557632	-90.6275	90.6275	8.65474e-10	-0.0375979	6007.98	149	0.16878	0.59523	0	1	6076.24	149	0.119681	TTC13	1	FLJ22584;	NM_024525.2	GeneID:79573		229182620
8712	cg08763351	0.736339	-90.6151	90.6151	8.67935e-10	-0.0301426	3648.78	149	0.128832	0.766482	0	1	3618.05	149	0.0851607	SPRR4	1		NM_173080.1	GeneID:163778		151209834
19131	cg19139729	0.687853	-90.6091	90.6091	8.69131e-10	-0.0328397	8513.13	149	0.129421	0.720692	0	1	8493.3	149	0.0826341	SULT2A1	19	HST; ST2; STD; hSTa; ST2A3; DHEA-ST;	NM_003167.2	GeneID:6822		53081374
5637	cg05649009	0.681604	-90.568	90.568	8.77405e-10	-0.0331438	2914.64	149	0.170661	0.714748	0	1	2895.06	149	0.11456	CHRNA1	2	ACHRA; ACHRD; CHRNA; CMS2A; FCCMS; SCCMS;	NM_000079.1	GeneID:1134		175338096
26825	cg26847866	0.597654	-90.5387	90.5387	8.83342e-10	-0.0365105	22132.1	149	0.184151	0.634164	0	1	22534.1	149	0.117635	SCARA3	8	CSR; APC7; CSR1; MSLR1; MSRL1;	NM_182826.1	GeneID:51435		27547996
8199	cg08251036	0.814549	-90.5206	90.5206	8.87044e-10	-0.0247419	6752.87	149	0.112808	0.839291	0	1	6787.83	149	0.0684534	MGAT5	2	GNT-V;	NM_002410.2	GeneID:4249		134725393
13582	cg13641903	0.52165	90.5125	90.5125	8.88696e-10	0.0386142	19943.1	149	0.145087	0.483036	0	1	20133.9	149	0.102641	WT1	11	GUD; WAGR; WT33; WIT-2;	NT_009237.17	GeneID:7490	11:32408563-32409903	32409184
6006	cg06029655	0.845745	-90.497	90.497	8.91863e-10	-0.0222401	12517.8	149	0.0897129	0.867985	0	1	12765.1	149	0.0557242	SBP1	19		NM_178121.2	GeneID:90198		47572972
25000	cg25023829	0.771822	-90.4573	90.4573	9.00051e-10	-0.0278306	3546.75	149	0.142852	0.799652	0	1	3592.89	149	0.0959755	H2BFS	21		NM_017445.1	GeneID:54145	21:43809403-43810034	43809919
14793	cg14792155	0.929664	-90.3816	90.3816	9.15885e-10	-0.0145353	19050	149	0.0642715	0.944199	0	1	19210.4	149	0.0376043	PLA2G4E	15	FLJ45651; MGC126633; MGC126661;	NM_198442.1	GeneID:123745		40076910
9355	cg09425611	0.561474	-90.1954	90.1954	9.56009e-10	-0.0374219	6724.01	149	0.172645	0.598896	0	1	6609.59	149	0.108461	CES1	16	CEH; TGH; ACAT; CES2; HMSE; SES1; HMSE1; CES1A2; CES1A1b; CES1A1c; MGC117365;	NM_001266.4	GeneID:1066		54425871
9364	cg09432154	0.603254	-90.1949	90.1949	9.56126e-10	-0.0362653	4553.03	149	0.166857	0.63952	0	1	4763.5	149	0.111315	GPR87	3	GPR95; FKSG78; KPG_002;	NM_023915.2	GeneID:53836		152517359
15091	cg15092802	0.826254	-90.0811	90.0811	9.8149e-10	-0.0237728	22915.6	149	0.0985125	0.850027	0	1	22928.9	149	0.063683	OBP2A	9	OBP; OBP2C; hOBPIIa; hOBPIIa(alpha);	NM_014582.1	GeneID:29991		137577873
11466	cg11527279	0.258507	90.0323	90.0323	9.92602e-10	0.0322556	7937.56	149	0.166433	0.226252	0	1	7915.45	149	0.109094	TTLL11	9	C9orf20; bA244O19.1;	NM_194252.1	GeneID:158135	9:123894574-123895782	123894667
21049	cg21085768	0.729097	-89.9841	89.9841	1.00366e-09	-0.0304739	18476.7	149	0.129625	0.759571	0	1	18663.1	149	0.0815222	PRSS21	16	ESP-1; TEST1;	NM_144956.1	GeneID:10942		2807089
19385	cg19394737	0.947837	-89.8384	89.8384	1.03792e-09	-0.0126493	24367.2	149	0.0523177	0.960486	0	1	24517.2	149	0.0311592	DKFZp434O0527	2		NM_194302.1	GeneID:255101	2:219600581-219600781	219600605
14079	cg14107638	0.654931	-89.8247	89.8247	1.0412e-09	-0.034243	7604.44	149	0.15517	0.689174	0	1	7792.3	149	0.0997169	MAGEA5	X	MAGE5; MGC129526;	NM_021049.3	GeneID:4104		151037036
27527	cg27603796	0.111493	89.765	89.765	1.05561e-09	0.0222778	16272.5	149	0.0962198	0.0892148	0	1	16422	149	0.058918	CTTNBP2	7	Orf4; C7orf8; CORTBP2; KIAA1758; MGC104579;	NM_033427.1	GeneID:83992	7:117300033-117301241	117300039
9587	cg09643544	0.117136	89.7628	89.7628	1.05615e-09	0.0227404	19249.3	149	0.106787	0.0943956	0	1	18992.3	149	0.0706462	ZNF177	19		NM_003451.1	GeneID:7730	19:9334490-9335153	9334696
14263	cg14288464	0.838508	-89.6758	89.6758	1.07751e-09	-0.0227393	20169.9	149	0.103609	0.861247	0	1	20311.2	149	0.0601854	WFDC5	20	PRG5; WAP1; dJ211D12.5;	NM_145652.2	GeneID:149708		43176715
10332	cg10412312	0.709001	-89.5953	89.5953	1.09767e-09	-0.0315523	2876.49	149	0.174569	0.740553	0	1	2869.2	149	0.118221	FLJ36004	12	Pas1c1;	NM_152590.1	GeneID:160492		25597128
538	cg00518911	0.63283	-89.5621	89.5621	1.10608e-09	-0.0350976	3004.29	149	0.167481	0.667928	0	1	2921.32	149	0.121684	HOXA10	7	PL; HOX1; HOX1H; HOX1.8; MGC12859;	NM_018951.2	GeneID:3206		27187829
23154	cg23181170	0.664318	-89.5376	89.5376	1.11234e-09	-0.0337744	2934.2	149	0.142132	0.698093	0	1	2911.28	149	0.0932693	GABRP	5		NM_014211.1	GeneID:2568		170143250
12040	cg12087643	0.0813956	89.5028	89.5028	1.1213e-09	0.0196718	24234.7	149	0.0867428	0.0617238	0	1	24161.9	149	0.0455153	GFRA1	10	GDNFR; RET1L; RETL1; TRNR1; GDNFRA; MGC23045; GFR-ALPHA-1;	NM_005264.2	GeneID:2674	10:118020244-118024333	118023360
6145	cg06190732	0.609287	-89.4537	89.4537	1.13404e-09	-0.0359225	2720.24	149	0.156168	0.64521	0	1	2731.84	149	0.108478	SERPINA3	14	ACT; AACT; GIG24; GIG25; MGC88254;	NM_001085.4	GeneID:12		94148389
6408	cg06434451	0.58241	-89.4101	89.4101	1.1455e-09	-0.036733	10962.8	149	0.138594	0.619143	0	1	11114	149	0.0891245	MARCKSL1	1	F52; MLP; MRP; MLP1; MACMARCKS;	NM_023009.4	GeneID:65108	1:32573266-32574965	32574878
2769	cg02764897	0.637673	-89.3616	89.3616	1.15834e-09	-0.03487	3031.42	149	0.184153	0.672543	0	1	3004.64	149	0.131825	KRTAP13-1	21	KAP13.1;	NM_181599.1	GeneID:140258		30690182
12412	cg12485992	0.905977	-89.2031	89.2031	1.20141e-09	-0.0167456	18590	149	0.0673523	0.922722	0	1	18657.1	149	0.0421517	SPATA22	17	NYD-SP20;	NM_032598.2	GeneID:84690	17:3321498-3322570	3321721
1379	cg01367992	0.462222	-89.0902	89.0902	1.23305e-09	-0.0383812	4494.54	149	0.155931	0.500603	0	1	4374.66	149	0.112135	LY9	1	hly9; mLY9; CD229; SLAMF3;	NM_002348.2	GeneID:4063		159033159
4638	cg04584523	0.86834	-88.9652	88.9652	1.26906e-09	-0.0201448	11150.9	149	0.098183	0.888485	0	1	11349.9	149	0.0616122	ELA3B	1		NM_007352.2	GeneID:23436		22175799
3112	cg03097995	0.566557	-88.9585	88.9585	1.27102e-09	-0.0370515	26623.5	149	0.146429	0.603608	0	1	26980.8	149	0.113559	TNNI3	19	CMH7; cTnI; TNNC1; MGC116817;	NM_000363.3	GeneID:7137		60360903
23633	cg23674788	0.74313	-88.9585	88.9585	1.27102e-09	-0.0294631	11420.7	149	0.119667	0.772593	0	1	11168.8	149	0.0764175	KRTHA2	17	HA2; Ha-2; hHa2;	NM_002278.2	GeneID:3882		36876839
4149	cg04103317	0.751265	-88.9479	88.9479	1.27412e-09	-0.028953	31213.6	149	0.13255	0.780218	0	1	31052	149	0.0991451	SPINK4	9	PEC-60; MGC133107;	NM_014471.1	GeneID:27290		33230960
613	cg00592315	0.730532	-88.9013	88.9013	1.28786e-09	-0.0302129	3412.18	149	0.132324	0.760745	0	1	3571.16	149	0.090921	C14orf152	14		NM_138344.2	GeneID:90050		93454364
12030	cg12080675	0.0825711	88.8435	88.8435	1.30513e-09	0.0197068	9825.85	149	0.0776794	0.0628643	0	1	10109.2	149	0.0507293	KIAA0676	5		NM_198868.2	GeneID:23061	5:179266772-179268149	179267829
19659	cg19680672	0.744393	-88.7748	88.7748	1.32594e-09	-0.0293555	6334.2	149	0.120295	0.773749	0	1	6044.37	149	0.0855142	MGMT	10		NT_008818.15	GeneID:4255	10:131302456-131302963	131302569
16872	cg16825000	0.772611	-88.6966	88.6966	1.35003e-09	-0.027518	13518.6	149	0.130345	0.800129	0	1	13390.7	149	0.0904872	PLA2G2E	1		NM_014589.1	GeneID:30814		20122017
9971	cg10056627	0.147009	88.6846	88.6846	1.35376e-09	0.02494	14913.5	149	0.113216	0.122069	0	1	15433.9	149	0.0705859	GNMT	6		NM_018960.4	GeneID:27232	6:43035706-43036927	43036751
27037	cg27081230	0.534097	-88.608	88.608	1.37784e-09	-0.0376421	5768.66	149	0.158467	0.571739	0	1	5743.93	149	0.103782	SLIC1	16	MGC35578;	NM_153337.1	GeneID:124460		49273030
7351	cg07371530	0.9252	-88.5577	88.5577	1.39391e-09	-0.014837	26517.2	149	0.072117	0.940037	0	1	26621	149	0.050068	RPUSD1	16	RLUCL; C16orf40; MGC19600;	NM_058192.2	GeneID:113000	16:779478-779751	779582
2998	cg02989940	0.768276	-88.2505	88.2505	1.49606e-09	-0.0277435	9724.35	149	0.144836	0.796019	0	1	9695.36	149	0.0992554	ERAF	16	AHSP; EDRF;	NM_016633.2	GeneID:51327		31446735
8748	cg08794763	0.71437	-88.2473	88.2473	1.49716e-09	-0.0310298	20461	149	0.134076	0.7454	0	1	20261.8	149	0.0887436	TLE6	19	GRG6; FLJ14009; MGC14966;	NM_024760.1	GeneID:79816		2928843
8805	cg08843314	0.68092	-88.2337	88.2337	1.50185e-09	-0.032763	4223.95	149	0.151532	0.713682	0	1	4243.66	149	0.102104	CXCR3	X	GPR9; IP10; MigR; CD183; Mig-R; CKR-L2; CMKAR3; IP10-R;	NM_001504.1	GeneID:2833		70754715
26343	cg26359240	0.874458	-88.1663	88.1663	1.52536e-09	-0.0195246	10836.3	149	0.0876241	0.893983	0	1	10755.2	149	0.0542507	HSDL1	16	MGC125994; MGC125995;	NM_031463.3	GeneID:83693		82737460
14693	cg14695751	0.627383	-88.1382	88.1382	1.53526e-09	-0.0350317	3825.48	149	0.143036	0.662415	0	1	3755.95	149	0.0980607	ALS2CR7	2		NM_139158.1	GeneID:65061		202379537
20411	cg20450764	0.210005	88.1251	88.1251	1.53989e-09	0.0291691	6038.38	149	0.118038	0.180836	0	1	6147.58	149	0.0758347	TSPAN7	X	A15; MXS1; CD231; CCG-B7; TM4SF2; TALLA-1; TM4SF2b; DXS1692E;	NM_004615.2	GeneID:7102	X:38305247-38306580	38305270
22143	cg22179082	0.106201	88.0208	88.0208	1.57732e-09	0.0216358	12896.9	149	0.0916925	0.0845653	0	1	12981.8	149	0.0574387	GPR12	13	GPCR21;	NM_005288.1	GeneID:2835	13:26231757-26233351	26232259
22947	cg22983529	0.0903189	88.0179	88.0179	1.57839e-09	0.0202931	22762.8	149	0.0911753	0.0700257	0	1	22822.3	149	0.0539502	GNG11	7	G protein;	NM_004126.2	GeneID:2791	7:93388850-93389536	93389068
10212	cg10287137	0.551523	87.8883	87.8883	1.62618e-09	0.037788	21211.9	149	0.149881	0.513735	0	1	21304.5	149	0.107155	P2RY2	11	P2U; HP2U; P2U1; P2UR; P2Y2; P2RU1; P2Y2R; MGC20088; MGC40010;	NM_002564.2	GeneID:5029	11:72606620-72607619	72606702
12898	cg12958813	0.683377	-87.8883	87.8883	1.62618e-09	-0.0325811	2625.95	149	0.154368	0.715958	0	1	2597.32	149	0.105339	ATP6V1G3	1	Vma10; ATP6G3; MGC119810; MGC119813;	NM_133262.2	GeneID:127124		196776292
20916	cg20959866	0.0912667	87.8883	87.8883	1.62618e-09	0.0203602	14704.5	149	0.0959745	0.0709064	0	1	14628.2	149	0.0597218	AJAP1	1	MOT8; SHREW1; SHREW-1; RP3-426F10.1;	NM_018836.2	GeneID:55966	1:4613727-4616670	4613868
11646	cg11710560	0.846798	-87.8829	87.8829	1.62822e-09	-0.0218468	11376	149	0.119571	0.868645	0	1	11525.8	149	0.0724637	KRTAP9-3	17	KAP9.3; KRTAP9.3;	NM_031962.2	GeneID:83900		36642670
15503	cg15503752	0.560346	-87.8802	87.8802	1.62921e-09	-0.0369747	9050.73	149	0.170534	0.597321	0	1	9002.71	149	0.111795	ST6GALNAC1	17	SIAT7A; HSY11339; ST6GalNAcI;	NM_018414.2	GeneID:55808		72151326
8515	cg08573687	0.937692	-87.7902	87.7902	1.66333e-09	-0.0135394	16239.8	149	0.0565387	0.951232	0	1	16457.1	149	0.0350431	TH	11	TYH;	NM_199292.1	GeneID:7054		2149617
12562	cg12622273	0.881522	-87.6939	87.6939	1.70064e-09	-0.0188497	27884.7	149	0.0828343	0.900372	0	1	27755.2	149	0.0512282	LGI4	19	LGIL3;	NM_139284.1	GeneID:163175		40317336
24025	cg24076830	0.743567	-87.671	87.671	1.70961e-09	-0.0292305	3670.89	149	0.144309	0.772798	0	1	3659.6	149	0.0963743	OR5V1	6	6M1-21; hs6M1-21;	NM_030876.4	GeneID:81696		29433112
5157	cg05119831	0.0725876	87.658	87.658	1.71476e-09	0.0186986	9490.36	149	0.079373	0.053889	0	1	9568.1	149	0.0471901	PTPRN2	7	IAR; ICAAR; PTPRP; IA-2beta;	NM_002847.2	GeneID:5799	7:158071751-158074029	158072940
4552	cg04511534	0.788554	-87.4783	87.4783	1.78717e-09	-0.0262408	20958.7	149	0.120373	0.814795	0	1	20683.6	149	0.0762673	GGT6	17	FLJ25990; FLJ90165;	NM_153338.1	GeneID:124975		4410120
19919	cg19930802	0.830883	-87.4355	87.4355	1.8049e-09	-0.0230753	9068.02	149	0.107467	0.853958	0	1	9135.91	149	0.0759175	ATP10A	15	ATPVA; ATPVC; ATP10C; KIAA0566;	NT_026446.13	GeneID:57194	15:23522920-23523591	23523567
8158	cg08201421	0.811261	-87.2556	87.2556	1.88124e-09	-0.0245613	17722.3	149	0.121165	0.835823	0	1	17617	149	0.0817885	TNNC2	20		NM_003279.2	GeneID:7125		43889558
3606	cg03580247	0.692166	-87.1588	87.1588	1.92363e-09	-0.0320165	4065.44	149	0.143837	0.724182	0	1	4062.56	149	0.0938922	SLC4A1	17	DI; FR; SW; WD; WR; AE1; WD1; BND3; EPB3; CD233; EMPB3; RTA1A; MGC116750; MGC116753; MGC126619; MGC126623;	NM_000342.1	GeneID:6521		39701014
25052	cg25071429	0.802366	-87.1396	87.1396	1.93214e-09	-0.0252035	8538.57	149	0.107126	0.827569	0	1	8671.23	149	0.0714992	TEX13B	X	TGC3B; TSGA5;	NM_031273.1	GeneID:56156		107111702
17718	cg17709873	0.486069	-87.0857	87.0857	1.95629e-09	-0.037872	25110.4	149	0.159236	0.523941	0	1	25813.8	149	0.108033	LTA	6	LT; TNFB; TNFSF1;	NM_000595.2	GeneID:4049		31648435
9511	cg09563216	0.302486	87.0594	87.0594	1.96814e-09	0.0338004	3622.51	149	0.153288	0.268686	0	1	3609.38	149	0.100755	C1orf51	1	FLJ25889;	NM_144697.2	GeneID:148523	1:148520405-148522224	148521865
280	cg00260778	0.684514	-87.0547	87.0547	1.97028e-09	-0.0323762	3287.62	149	0.137214	0.71689	0	1	3455.43	149	0.0990358	C10orf111	10	MGC35468; bA455B2.4;	NM_153244.1	GeneID:221060	10:15178782-15180947	15180418
10042	cg10126923	0.512263	87.0547	87.0547	1.97028e-09	0.0379201	20356.1	149	0.169739	0.474343	0	1	20318.8	149	0.120291	NKG7	19	GIG1;	NM_005601.3	GeneID:4818		56567263
22936	cg22975568	0.783958	-87.0425	87.0425	1.97585e-09	-0.0264984	5268.91	149	0.123758	0.810456	0	1	5218.27	149	0.0808581	CD74	5	DHLAG; HLADG; Ia-GAMMA; protein 41;	NM_004355.2	GeneID:972		149773629
17637	cg17628717	0.793672	-87.0422	87.0422	1.97598e-09	-0.0258156	8458.52	149	0.151787	0.819488	0	1	8442.9	149	0.0977849	HECW1	7	NEDL1; KIAA0322;	NM_015052.2	GeneID:23072	7:43317647-43318185	43317733
2369	cg02330106	0.721068	-87.0331	87.0331	1.9801e-09	-0.0304487	17567.2	149	0.137027	0.751517	0	1	17676.7	149	0.0898038	MGMT	10		NM_002412.2	GeneID:4255	10:131154808-131155770	131154830
23626	cg23667432	0.639986	-87.0073	87.0073	1.9919e-09	-0.0343308	20400.2	149	0.173015	0.674317	0	1	20499.2	149	0.115894	ALPP	2	ALP; PLAP;	NM_001632.2	GeneID:250	2:232952438-232952963	232952683
26460	cg26499286	0.558884	-86.9962	86.9962	1.997e-09	-0.036824	8919.16	149	0.180566	0.595708	0	1	8790.15	149	0.115817	KRTAP17-1	17	KAP17.1; KRTAP16.1; KRTAP17.1;	NM_031964.1	GeneID:83902	17:36725959-36726162	36726024
6873	cg06882926	0.630076	-86.9738	86.9738	2.00735e-09	-0.034704	2216.32	149	0.153149	0.66478	0	1	2177.49	149	0.106785	OR1G1	17	OR1G2; OR17-130; OR17-209;	NM_003555.1	GeneID:8390		2978104
3916	cg03876618	0.0999856	86.9383	86.9383	2.02379e-09	0.0209912	18295.2	149	0.0992288	0.0789944	0	1	18293.2	149	0.0644945	IGFBP7	4	PSF; FSTL2; MAC25; IGFBP-7;	NM_001553.1	GeneID:3490	4:57670424-57671769	57670791
17123	cg17091851	0.655514	-86.9225	86.9225	2.0312e-09	-0.0336762	8884.43	149	0.165321	0.68919	0	1	8813.67	149	0.119498	LOC348174	16		NM_182619.1	GeneID:348174	16:68542384-68542590	68542440
18231	cg18224761	0.752063	-86.851	86.851	2.06489e-09	-0.0285723	3847.93	149	0.165018	0.780636	0	1	3829.18	149	0.104498	C1orf33	1	dJ657E11.4;	NM_016183.2	GeneID:51154		19449508
14484	cg14480463	0.130824	86.8347	86.8347	2.07266e-09	0.0234621	18459.6	149	0.104024	0.107361	0	1	18817.1	149	0.0643403	INT1	7		XM_931325.1	GeneID:26173	7:1509056-1511276	1509961
9246	cg09304624	0.660156	-86.7772	86.7772	2.10027e-09	-0.0334485	3321.84	149	0.155193	0.693605	0	1	3302.32	149	0.10219	PI15	8	P24TI; P25TI; CRISP8; DKFZp686F0366;	NM_015886.3	GeneID:51050		75898288
2678	cg02671171	0.634777	-86.7254	86.7254	2.12551e-09	-0.0344777	4979.93	149	0.160717	0.669255	0	1	4800.2	149	0.103498	RPH3AL	17	NOC2;	NM_006987.2	GeneID:9501		203087
10611	cg10707565	0.683653	-86.7227	86.7227	2.12682e-09	-0.0323555	2468.49	149	0.150171	0.716008	0	1	2438.22	149	0.102174	CUBN	10	IFCR; MGA1; gp280; cubilin;	NM_001081.2	GeneID:8029		17211701
19480	cg19481953	0.650135	-86.6383	86.6383	2.16856e-09	-0.0338486	2741.92	149	0.162534	0.683983	0	1	2679.02	149	0.105848	SRPX2	X	SRPX; SRPUL;	NM_014467.1	GeneID:27286		99785577
15848	cg15791248	0.622446	-86.6007	86.6007	2.18741e-09	-0.0349086	11511.6	149	0.149029	0.657354	0	1	11565.1	149	0.0983569	FGFR1	8	H2; H3; H4; H5; CEK; FLG; FLT2; KAL2; BFGFR; C-FGR; CD331; N-SAM;	NM_000604.2	GeneID:2260		38445887
3807	cg03780486	0.69	-86.5905	86.5905	2.19258e-09	-0.0320196	2889.34	149	0.17241	0.72202	0	1	2873.93	149	0.121214	OR6A2	11	I7; OR6A1; OR6A2P; OR11-55; MGC126538; MGC126540;	NM_003696.2	GeneID:8590		6773856
18947	cg18956481	0.127067	86.5872	86.5872	2.19421e-09	0.0231377	7167.81	149	0.113039	0.10393	0	1	7107.58	149	0.0720208	CYP24A1	20	CP24; CYP24; MGC126273; MGC126274; P450-CC24;	NM_000782.3	GeneID:1591	20:52222583-52223813	52223546
13620	cg13675849	0.869901	-86.5016	86.5016	2.23788e-09	-0.0197416	7701.57	149	0.0884174	0.889643	0	1	7853.59	149	0.0599928	TRPV5	7	CAT2; ECAC1;	NM_019841.3	GeneID:56302		142341337
11318	cg11385473	0.139266	86.4782	86.4782	2.24997e-09	0.0240605	4728.94	149	0.099552	0.115206	0	1	4798.48	149	0.0672654	IMMP1L	11	FLJ25059;	NM_144981.1	GeneID:196294		31487519
15598	cg15586352	0.655435	-86.4782	86.4782	2.24997e-09	-0.0335946	30284.9	149	0.129513	0.689029	0	1	30382.9	149	0.0920291	PSG5	19	PSG; FL-NCA-3;	NM_002781.2	GeneID:5673		48382983
7722	cg07752420	0.142258	86.3626	86.3626	2.31069e-09	0.0242706	10173.5	149	0.102265	0.117987	0	1	10251.6	149	0.0629146	CDKN2A	9	ARF; MLM; p14; p16; p19; CMM2; INK4; MTS1; TP16; CDK4I; CDKN2; INK4a; p14ARF; p16INK4; p16INK4a;	NT_008413.17	GeneID:1029	9:21958106-21958899	21958681
27031	cg27076139	0.0657849	86.3583	86.3583	2.31298e-09	0.0179566	15989.3	149	0.0751625	0.0478283	0	1	16071.5	149	0.0453812	ADCYAP1R1	7	PACAPR; PACAPRI;	NM_001118.3	GeneID:117	7:31058165-31059618	31058243
7656	cg07685034	0.61225	-86.354	86.354	2.31526e-09	-0.0352103	4412.23	149	0.17848	0.647461	0	1	4419.69	149	0.115579	PCBP3	21	ALPHA-CP3;	NM_020528.1	GeneID:54039		46094055
19545	cg19553721	0.789308	-86.3375	86.3375	2.32408e-09	-0.0260204	16238.2	149	0.117438	0.815328	0	1	16095.6	149	0.0754011	FAM106A	17	FLJ11800;	NM_024974.1	GeneID:80039		18370676
10646	cg10742225	0.641836	-86.3279	86.3279	2.3292e-09	-0.0341239	3800.93	149	0.177048	0.67596	0	1	3801.96	149	0.112344	KRT13	17	K13; CK13; MGC3781;	NM_002274.2	GeneID:3860		36916506
26463	cg26502489	0.735524	-86.1882	86.1882	2.40534e-09	-0.0294708	3856.31	149	0.157595	0.764995	0	1	3728.66	149	0.108936	SCN2B	11		NM_004588.3	GeneID:6327		117553756
14373	cg14380517	0.273914	86.1116	86.1116	2.44818e-09	0.0323314	24654.3	149	0.147793	0.241583	0	1	24857.4	149	0.107728	BTG3	21	ANA; TOB5; TOFA; TOB55; MGC8928;	NM_006806.3	GeneID:10950	21:17905716-17907712	17907632
16057	cg15979932	0.597975	-86.0936	86.0936	2.4583e-09	-0.0356129	3852.46	149	0.180463	0.633587	0	1	3758.01	149	0.116058	CUEDC1	17	FLJ20739; DKFZp547L163;	NM_017949.1	GeneID:404093		53335106
12929	cg12989650	0.666793	-86.0388	86.0388	2.48955e-09	-0.0330159	3113.85	149	0.156036	0.699809	0	1	3116.78	149	0.0984668	ARHGEF15	17	ARGEF15; FLJ13791; KIAA0915; MGC44868; Vsm-RhoGEF;	NM_173728.2	GeneID:22899		8154053
12575	cg12629515	0.571408	-86.025	86.025	2.49747e-09	-0.0363279	3897.98	149	0.160019	0.607736	0	1	3867.18	149	0.106557	HIST1H2BO	6	H2B.2; H2B/n; H2BFN; MGC119806; dJ193B12.2;	NM_003527.4	GeneID:8348	6:27967671-27968276	27967790
9293	cg09358725	0.451029	86.0238	86.0238	2.49814e-09	0.0374863	7892.86	149	0.144572	0.413543	0	1	8145.52	149	0.110233	LMO2	11	TTG2; RBTN2; RHOM2; RBTNL1;	NM_005574.2	GeneID:4005		33870664
3418	cg03391568	0.714744	-85.9518	85.9518	2.53991e-09	-0.0306128	18680.8	149	0.152656	0.745357	0	1	18911.1	149	0.104859	PTHR1	3	PTHR; MGC138426; MGC138452;	NM_000316.2	GeneID:5745		46893270
5656	cg05663262	0.652109	-85.8886	85.8886	2.57715e-09	-0.0336224	3727.9	149	0.172992	0.685731	0	1	3686.75	149	0.112084	HYI	1	HT036; MGC20767; RP11-506B15.5;	NM_031207.2	GeneID:81888		43702866
12387	cg12459502	0.451377	85.7805	85.7805	2.64213e-09	0.0374384	7010.53	149	0.165534	0.413939	0	1	6790.11	149	0.109564	BCL2	18	Bcl-2;	NT_025028.13	GeneID:596	18:59054789-59055400	59055217
14950	cg14942312	0.637534	-85.758	85.758	2.6558e-09	-0.0341829	10463.2	149	0.174562	0.671717	0	1	10624.2	149	0.113415	GPR119	X	GPCR2; hGPCR2; MGC119957;	NM_178471.1	GeneID:139760		129346742
13321	cg13391235	0.545097	-85.7457	85.7457	2.66334e-09	-0.0368415	5651.78	149	0.161812	0.581938	0	1	5687.48	149	0.104506	MGC22001	16		NM_153238.1	GeneID:197196		83874112
23043	cg23081213	0.699514	-85.7386	85.7386	2.66771e-09	-0.0313844	16231.6	149	0.128428	0.730899	0	1	16452.5	149	0.0884293	PRKAG3	2	AMPKG3;	NM_017431.2	GeneID:53632	2:219404498-219404730	219404716
21829	cg21846488	0.625726	-85.7129	85.7129	2.68358e-09	-0.0346142	6405.64	149	0.170595	0.66034	0	1	6289.84	149	0.109994	LCE4A	1	LEP8; SPRL4A;	NM_178356.1	GeneID:199834	1:150947451-150947651	150947467
17054	cg17026542	0.783336	-85.6968	85.6968	2.69353e-09	-0.0263401	17058.2	149	0.12619	0.809677	0	1	16829.1	149	0.0804167	OR2A4	6	OR2A10;	NM_030908.1	GeneID:79541		132064183
9756	cg09837943	0.632228	-85.6394	85.6394	2.72934e-09	-0.0343604	8488.25	149	0.146314	0.666588	0	1	8513.42	149	0.0968006	ZIM2	19		NT_011109.15	GeneID:23619	19:61998334-61999073	61998443
1813	cg01789267	0.700738	-85.5976	85.5976	2.75574e-09	-0.0312958	2721.82	149	0.14631	0.732034	0	1	2696.05	149	0.104149	SLC28A2	15	CNT2; HCNT2; SPNT1; HsT17153;	NM_004212.1	GeneID:9153		43332403
7201	cg07218880	0.497016	-85.5509	85.5509	2.78554e-09	-0.0374549	5627.29	149	0.147493	0.534471	0	1	5570.66	149	0.103511	UPF3A	13	UPF3; HUPF3A; RENT3A;	NM_023011.2	GeneID:65110	13:114064177-114064450	114064381
23567	cg23617760	0.724318	-85.4713	85.4713	2.83704e-09	-0.0299978	11797.3	149	0.121162	0.754316	0	1	11301.7	149	0.0808435	C16orf44	16	FLJ12543;	NM_024731.2	GeneID:79786		83239008
14852	cg14847483	0.289967	-85.4676	85.4676	2.8395e-09	-0.0343562	8235.15	149	0.104073	0.324323	0	1	8245.27	149	0.091816	TMEM85	15	PIG17; FLJ90746; MGC24415;	NM_016454.2	GeneID:51234		32303932
25124	cg25133753	0.611617	-85.4643	85.4643	2.84167e-09	-0.035052	3404.94	149	0.182287	0.646669	0	1	3427.48	149	0.117795	WFDC11	20	WAP11; MGC71905;	NM_147197.2	GeneID:259239		43733140
14564	cg14561282	0.706624	-85.401	85.401	2.88338e-09	-0.030953	7518.7	149	0.137212	0.737577	0	1	7426.11	149	0.0892322	ADAM29	4	svph1;	NM_014269.3	GeneID:11086		176076043
12365	cg12439773	0.770275	-85.322	85.322	2.93627e-09	-0.0271615	21817.3	149	0.13236	0.797436	0	1	21579.2	149	0.0846257	SLC22A6	11	OAT1; PAHT; HOAT1; ROAT1; MGC45260;	NM_004790.3	GeneID:9356		62508695
15803	cg15761405	0.646191	-85.216	85.216	3.00888e-09	-0.0337358	2127	149	0.159432	0.679927	0	1	2110.46	149	0.107441	FCRL2	1	FCRH2; IFGP4; IRTA4; SPAP1; SPAP1A; SPAP1B; SPAP1C;	NM_030764.2	GeneID:79368		156013029
619	cg00600110	0.925247	-85.182	85.182	3.03248e-09	-0.0145604	12159.6	149	0.0617033	0.939808	0	1	13201.8	149	0.0408577	FAM9A	X		NM_174951.2	GeneID:171482	X:8729086-8729604	8729528
6543	cg06547766	0.644845	-85.1331	85.1331	3.06681e-09	-0.0337737	2028.45	149	0.150667	0.678618	0	1	2023.1	149	0.103992	LPP	3		NM_005578.2	GeneID:4026		189413398
7245	cg07269146	0.727672	-85.1193	85.1193	3.07662e-09	-0.0297474	3960.95	149	0.148485	0.757419	0	1	4048.38	149	0.0961392	CCL21	9	ECL; SLC; CKb9; TCA4; 6Ckine; SCYA21; MGC34555;	NM_002989.2	GeneID:6366		34700657
10100	cg10180697	0.672872	-85.1103	85.1103	3.08297e-09	-0.0325658	2190.49	149	0.168745	0.705438	0	1	2227.31	149	0.11812	MSH3	5		NM_002439.2	GeneID:4437		79984697
18394	cg18390025	0.313927	85.1103	85.1103	3.08297e-09	0.033888	5919.19	149	0.12974	0.280039	0	1	6007.37	149	0.092794	ELOVL3	10	CIG30; CIG-30; MGC21435;	NM_152310.1	GeneID:83401	10:103976562-103976832	103976726
152	cg00136477	0.625834	-85.0307	85.0307	3.13997e-09	-0.0344749	31512.7	149	0.16143	0.660309	0	1	32727	149	0.109096	C1QC	1	C1QG; C1q-C; FLJ27103;	NM_172369.2	GeneID:714		22842926
23622	cg23663653	0.821126	-85.0131	85.0131	3.15279e-09	-0.0235136	25943.7	149	0.11155	0.84464	0	1	26024.7	149	0.0689935		14			GeneID:3500	14:105280160-105280368	105280252
14258	cg14284171	0.874422	-84.9985	84.9985	3.16341e-09	-0.0191872	15875.3	149	0.0772314	0.893609	0	1	15949.5	149	0.0485366	SSX4	X	MGC12411;	NM_005636.3	GeneID:6759	X:48155679-48156480	48155845
22237	cg22262964	0.549203	-84.9924	84.9924	3.16782e-09	-0.0366005	16528.2	149	0.174998	0.585803	0	1	17185.1	149	0.12351		2			GeneID:50802		89410695
10520	cg10602543	0.765826	-84.9889	84.9889	3.17036e-09	-0.0273994	30786.6	149	0.140694	0.793225	0	1	30592.1	149	0.0967828	H19	11	ASM; BWS; ASM1; MGC4485; PRO2605; D11S813E;	NT_009237.17	GeneID:283120	11:1973035-1973716	1973323
2079	cg02049180	0.672398	-84.9383	84.9383	3.20751e-09	-0.0325544	5686.85	149	0.13062	0.704952	0	1	5571.19	149	0.0861851	INSRR	1	IRR;	NM_014215.1	GeneID:3645		155094826
18911	cg18920397	0.456888	-84.9195	84.9195	3.22142e-09	-0.0374733	19546.2	149	0.156609	0.494361	0	1	19790.5	149	0.114257	LY9	1	hly9; mLY9; CD229; SLAMF3;	NM_002348.2	GeneID:4063		159032429
25439	cg25447894	0.511109	-84.8782	84.8782	3.25226e-09	-0.0371676	11352.8	149	0.1555	0.548276	0	1	11213.3	149	0.10455	CSDC2	22	PIPPIN; dJ347H13.2;	NM_014460.2	GeneID:27254		40287389
14333	cg14345882	0.252687	84.8743	84.8743	3.25511e-09	0.0310445	7266.87	149	0.17839	0.221643	0	1	7307.2	149	0.130811	BTN3A2	6	BTF4; BT3.2; BT3.3;	NM_007047.3	GeneID:11118		26472772
9674	cg09750183	0.907562	-84.8649	84.8649	3.26219e-09	-0.0162044	15525.9	149	0.0677107	0.923766	0	1	15618.8	149	0.0410089	PGA5	11		NM_014224.1	GeneID:5222		60764685
20217	cg20256783	0.872819	-84.7705	84.7705	3.33391e-09	-0.0192999	23619.2	149	0.0864844	0.892119	0	1	23713.7	149	0.0583726	K6HF	12		NM_004693.1	GeneID:9119		51114114
18788	cg18787783	0.709305	-84.753	84.753	3.34736e-09	-0.030695	5061.73	149	0.126848	0.74	0	1	5001.4	149	0.0788704	MMP19	12	MMP18; RASI-1;	NM_002429.4	GeneID:4327		54523308
9639	cg09702010	0.507185	-84.6312	84.6312	3.44259e-09	-0.0371572	3333.45	149	0.146585	0.544342	0	1	3247.67	149	0.0982313	KLK11	19	TLSP; PRSS20; MGC33060;	NM_006853.2	GeneID:11012		56223205
4057	cg04005707	0.0966425	84.5045	84.5045	3.54443e-09	0.0204294	16405	149	0.0994175	0.0762131	0	1	16532.2	149	0.0635806	FLJ21511	4		NM_025087.1	GeneID:80157	4:48682670-48683738	48683078
990	cg00953256	0.864945	-84.4874	84.4874	3.55844e-09	-0.0199394	19364.7	149	0.0965367	0.884884	0	1	19209.6	149	0.0611496	CCND1	11	BCL1; PRAD1; U21B31; D11S287E; cyclin D1;	NT_078088.3	GeneID:595	11:69177944-69178494	69178056
7105	cg07109287	0.0703898	84.4661	84.4661	3.57597e-09	0.0181751	14599.3	149	0.0817	0.0522147	0	1	14654.9	149	0.0496156	LHX2	9	LH2; hLhx2;	NM_004789.3	GeneID:9355	9:125813052-125815466	125813894
22270	cg22297305	0.0614006	84.456	84.456	3.58425e-09	0.0173728	22247.6	149	0.0805592	0.0440278	0	1	22410.9	149	0.050927	PRODH	22	PIG6; SCZD4; HSPOX2; PRODH1; PRODH2; TP53I6;	NM_016335.2	GeneID:5625	22:17303289-17304011	17303471
25967	cg25989745	0.652424	-84.4153	84.4153	3.61805e-09	-0.0333245	3134.64	149	0.179604	0.685748	0	1	3150.64	149	0.117883	TYRP1	9	TRP; CAS2; CATB; GP75; TYRP; b-PROTEIN;	NM_000550.1	GeneID:7306		12683326
27342	cg27404050	0.68324	-84.3786	84.3786	3.64868e-09	-0.0319441	3046.65	149	0.157197	0.715184	0	1	2948.04	149	0.100881	PRODH2	19	HSPOX1;	NM_021232.1	GeneID:58510		40995720
3836	cg03805684	0.529562	-84.3709	84.3709	3.65522e-09	-0.0368106	8983.43	149	0.16468	0.566372	0	1	9026.38	149	0.10461	C11orf10	11		NM_014206.1	GeneID:746		61317795
24376	cg24427660	0.545435	84.3274	84.3274	3.69199e-09	0.0370781	20756.8	149	0.149517	0.508357	0	1	21019	149	0.11082	PNPLA2	11	ATGL; FP17548; TTS-2.2; 1110001C14Rik;	NM_020376.2	GeneID:57104	11:808884-809164	808892
5489	cg05477024	0.143275	84.2768	84.2768	3.73522e-09	0.0240601	5740.37	149	0.102018	0.119215	0	1	5767.11	149	0.0617808	KIAA1804	1	MLK4; dJ862P8.3;	NM_032435.1	GeneID:84451	1:231529252-231531281	231529388
8330	cg08380205	0.16826	84.2718	84.2718	3.73959e-09	0.0258417	29676.6	149	0.131009	0.142419	0	1	29122.9	149	0.0929501	SPSB4	3	SSB4; SSB-4;	NM_080862.1	GeneID:92369	3:142252136-142254676	142252381
17153	cg17124700	0.752138	-84.2636	84.2636	3.74658e-09	-0.0281494	4381.99	149	0.117191	0.780288	0	1	4398.49	149	0.0787521	RGS8	1		NM_033345.1	GeneID:85397		180909371
13816	cg13859324	0.633944	-84.2623	84.2623	3.74775e-09	-0.034022	5843.94	149	0.154023	0.667966	0	1	5851.85	149	0.0996805	UNC45B	17	CMYA4; UNC45; MGC119541;	NM_173167.2	GeneID:146862		30498805
11070	cg11154879	0.784767	-84.2588	84.2588	3.75078e-09	-0.0260261	21316.6	149	0.0987962	0.810793	0	1	21212.2	149	0.0664602	C20orf151	20	dJ908M14.3;	NM_080833.1	GeneID:140893	20:60435074-60435343	60435170
21596	cg21607649	0.593897	-84.234	84.234	3.77223e-09	-0.0353489	9409.3	149	0.179006	0.629246	0	1	9469.51	149	0.11278	GPR123	10		NM_032422.1	GeneID:84435		134734167
22990	cg23033024	0.773277	-84.234	84.234	3.77223e-09	-0.0267934	5360.71	149	0.127798	0.80007	0	1	5329.97	149	0.0874403	CST8	20	CRES;	NM_005492.2	GeneID:10047		23420484
502	cg00488364	0.688779	-84.1868	84.1868	3.8135e-09	-0.0316391	2738.3	149	0.180358	0.720418	0	1	2803.5	149	0.134192	IL13RA2	X	IL-13R; IL13BP; CD213A2;	NM_000640.2	GeneID:3598		114159571
10772	cg10878307	0.797045	-84.0247	84.0247	3.95848e-09	-0.0251389	18490.5	149	0.117759	0.822184	0	1	18311	149	0.0774428	ATAD4	17	MGC11242;	NM_024320.2	GeneID:79170		43389454
23761	cg23813257	0.451101	-84.0247	84.0247	3.95848e-09	-0.0372677	36016	149	0.146097	0.488369	0	1	37142.2	149	0.0973204	IL32	16	NK4; TAIF; TAIFa; TAIFb; TAIFc; TAIFd; IL-32beta; IL-32alpha; IL-32delta; IL-32gamma;	NM_001012631.1	GeneID:9235		3055287
26912	cg26952188	0.815883	-83.9997	83.9997	3.98137e-09	-0.0237691	8831.15	149	0.0848742	0.839652	0	1	8945.28	149	0.0545388	MYO7A	11	DFNB2; MYU7A; NSRD2; USH1B; DFNA11;	NM_000260.1	GeneID:4647		76517889
2449	cg02431964	0.777274	-83.9927	83.9927	3.98776e-09	-0.0264915	4827.91	149	0.11956	0.803766	0	1	4891.71	149	0.0794969	MARCO	2	SCARA2;	NM_006770.3	GeneID:8685		119416499
19477	cg19481052	0.591375	-83.8152	83.8152	4.15412e-09	-0.0353362	2484.72	149	0.156069	0.626711	0	1	2535.06	149	0.106596	PLP1	X	PLP; PMD; MMPL; SPG2; PLP/DM20;	NM_000533.3	GeneID:5354		102918793
7240	cg07264679	0.769663	-83.7939	83.7939	4.17452e-09	-0.0269634	6405.38	149	0.143401	0.796626	0	1	6391.19	149	0.0940073	CD163	12	M130; MM130;	NM_004244.3	GeneID:9332		7548663
4525	cg04488521	0.0677643	83.785	83.785	4.18309e-09	0.0178725	15862.2	149	0.0732223	0.0498917	0	1	15960.8	149	0.0433484	ZNF354C	5	KID3;	NM_014594.1	GeneID:30832	5:178419646-178420866	178420322
26820	cg26845278	0.738772	-83.7537	83.7537	4.21337e-09	-0.0288713	5238.39	149	0.127797	0.767643	0	1	5152.46	149	0.0777091	SPATA21	1	MGC27074; spergen2; spergen-2; RP11-430L17.3;	NM_198546.1	GeneID:374955		16636258
780	cg00750606	0.668641	-83.7376	83.7376	4.22906e-09	-0.0324964	15447.5	149	0.200624	0.701137	0	1	15363.1	149	0.129685	CDA	1	CDD; hscd;	NM_001785.1	GeneID:978		20771708
19092	cg19105504	0.563993	-83.7267	83.7267	4.23963e-09	-0.0360152	3554.71	149	0.140743	0.600008	0	1	3564.17	149	0.111135	MGC35295	11		NM_152717.1	GeneID:219995	11:60280945-60281190	60281048
22749	cg22789545	0.77894	-83.7267	83.7267	4.23963e-09	-0.0263398	32838.5	149	0.121544	0.80528	0	1	32650.9	149	0.0758705	C20orf114	20	LPLUNC1; MGC14597;	NM_033197.2	GeneID:92747		31335013
23233	cg23260026	0.523208	-83.7267	83.7267	4.23963e-09	-0.0367611	10116.8	149	0.112877	0.559969	0	1	10258.3	149	0.0797137	FSTL3	19	FLRG; FSRP;	NM_005860.1	GeneID:10272	19:626374-626575	626390
8554	cg08612037	0.0831427	83.6196	83.6196	4.34549e-09	0.0191905	11893.1	149	0.0801785	0.0639522	0	1	11956.1	149	0.0484126	BTBD11	12	FLJ33957; FLJ42845;	NM_001017523.1	GeneID:121551	12:106235619-106239476	106236340
22475	cg22496683	0.61578	-83.6182	83.6182	4.34693e-09	-0.034537	21833.4	149	0.142081	0.650317	0	1	22164	149	0.113058	MGC27016	4		NM_144979.2	GeneID:166863	4:155921599-155922908	155922060
2885	cg02883621	0.850246	-83.4381	83.4381	4.531e-09	-0.0210293	20133.6	149	0.0972236	0.871275	0	1	20159.8	149	0.0645836	S100P	4	MIG9;	NM_005980.2	GeneID:6286		6745824
14936	cg14924278	0.6685	-83.4083	83.4083	4.56212e-09	-0.0324406	3859.21	149	0.167488	0.700941	0	1	3902.38	149	0.109786	TACC2	10	AZU-1; ECTACC;	NM_006997.2	GeneID:10579		123738912
21508	cg21519900	0.804548	-83.3744	83.3744	4.59785e-09	-0.0245114	6349.78	149	0.124629	0.829059	0	1	6293.4	149	0.0799219	C20orf186	20	RY2G5; LPLUNC4; dJ726C3.5;	NM_182519.1	GeneID:149954		31134273
16087	cg16001913	0.753203	-83.295	83.295	4.68272e-09	-0.0279268	4646.26	149	0.137592	0.78113	0	1	4675.75	149	0.0929316	HK1	10	HKI; HXK1; HK1-ta; HK1-tb;	NM_033496.1	GeneID:3098		70699650
8982	cg09038914	0.696469	-83.2799	83.2799	4.699e-09	-0.0310943	16355.2	149	0.13913	0.727563	0	1	16732.2	149	0.0883147	GFAP	17	FLJ45472;	NM_002055.2	GeneID:2670	17:40347936-40348194	40348093
7982	cg08012287	0.57521	-83.2528	83.2528	4.72841e-09	-0.0356495	12374	149	0.178382	0.610859	0	1	12148.6	149	0.114259	ACTN3	11	MGC117002; MGC117005;	NM_001104.1	GeneID:89		66071874
5669	cg05671350	0.215914	83.2351	83.2351	4.74774e-09	0.0287212	11079.8	149	0.124783	0.187192	0	1	11251.4	149	0.0775878	P4HA3	11	C-P4H alpha III;	NM_182904.3	GeneID:283208	11:73699933-73700730	73699996
21251	cg21274025	0.868698	-83.1982	83.1982	4.78827e-09	-0.0194761	10285.6	149	0.0785888	0.888174	0	1	10356.6	149	0.0487344	PLA2G3	22	GIII-SPLA2;	NM_015715.2	GeneID:50487		29865981
25645	cg25661884	0.503337	-83.1982	83.1982	4.78827e-09	-0.0368799	7081.05	149	0.129408	0.540217	0	1	7021.71	149	0.0845727	RDH8	19	PRRDH;	NM_015725.1	GeneID:50700		9985267
11629	cg11695358	0.799884	-83.1956	83.1956	4.7912e-09	-0.0248179	6286.21	149	0.104914	0.824702	0	1	6238.77	149	0.0710216	MAPK15	8	ERK7; ERK8;	NM_139021.1	GeneID:225689	8:144869897-144871106	144869951
18376	cg18374517	0.681334	-83.1807	83.1807	4.80765e-09	-0.0318095	8459.78	149	0.142311	0.713144	0	1	7980.86	149	0.0918047	ALPPL2	2	ALPG; GCAP; ALPPL;	NM_031313.1	GeneID:251		232979819
1422	cg01413516	0.879274	-83.1416	83.1416	4.8511e-09	-0.0185666	21606.2	149	0.0994952	0.897841	0	1	21349.2	149	0.0642865	INSL3	19	RLF; RLNL; MGC119818; MGC119819;	NM_005543.2	GeneID:3640	19:17792758-17793397	17793328
10832	cg10923408	0.519678	-83.1171	83.1171	4.8785e-09	-0.036675	17047.4	149	0.139116	0.556353	0	1	17200.2	149	0.104123	MGC40178	13		NM_152325.1	GeneID:122046	13:30404651-30404896	30404710
20595	cg20645058	0.795743	-83.1171	83.1171	4.8785e-09	-0.0250973	11570.6	149	0.088734	0.82084	0	1	11536.8	149	0.0514643	CLEC12B	12	UNQ5782;	NM_205852.1	GeneID:387837		10054799
27166	cg27223827	0.719901	-83.1171	83.1171	4.8785e-09	-0.0298332	14276.2	149	0.158961	0.749734	0	1	14102.2	149	0.105834	FHL2	2	DRAL; SLIM3;	NM_201556.1	GeneID:2274		105421352
25743	cg25764191	0.0676175	83.1077	83.1077	4.88906e-09	0.0177888	18631.2	149	0.0820944	0.0498287	0	1	18852.1	149	0.0522507	INA	10	NEF5; NF-66; TXBP-1; MGC12702;	NM_032727.2	GeneID:9118	10:105026442-105028852	105027205
10231	cg10305797	0.730182	-83.0541	83.0541	4.94987e-09	-0.0292479	7122.99	149	0.143103	0.759429	0	1	6933.89	149	0.0960634	UNQ467	19		NM_207392.1	GeneID:388533		40673517
21702	cg21695020	0.764659	-83.0087	83.0087	5.00181e-09	-0.0271601	14337.9	149	0.0973307	0.791819	0	1	14378.6	149	0.0666517	DPEP3	16	MBD3;	NM_022357.1	GeneID:64180	16:66571413-66572132	66572127
3953	cg03914397	0.644642	-83.0084	83.0084	5.0022e-09	-0.0333602	4787.69	149	0.138759	0.678003	0	1	4653.29	149	0.0883889	NMUR2	5	FM4; NMU2R;	NM_020167.3	GeneID:56923	5:151764215-151764644	151764634
16129	cg16042149	0.148345	82.9525	82.9525	5.06694e-09	0.0242432	9609.55	149	0.101648	0.124101	0	1	9457.08	149	0.0600476	NEFH	22	NFH;	NM_021076.2	GeneID:4744	22:28205749-28207420	28205947
6770	cg06784466	0.658907	-82.9193	82.9193	5.10583e-09	-0.03276	3307.14	149	0.186765	0.691667	0	1	3316.36	149	0.132898	FPRL2	19	FMLPY; FPRH1; FPRH2; RMLP-R-I; FML2_HUMAN;	NM_002030.3	GeneID:2359		56989780
1698	cg01669948	0.832896	-82.917	82.917	5.10857e-09	-0.0223334	19442.1	149	0.108543	0.855229	0	1	19538.1	149	0.0648107	KCNK16	6	TALK1; TALK-1;	NM_032115.2	GeneID:83795		39398855
19455	cg19456540	0.0509627	82.917	82.917	5.10857e-09	0.0162767	17168.1	149	0.0695584	0.034686	0	1	17326.2	149	0.0440192	SIX6	14	Six9; OPTX2;	NM_007374.1	GeneID:4990	14:60045112-60046647	60046038
15449	cg15448245	0.744737	-82.8012	82.8012	5.24656e-09	-0.0283564	6889.53	149	0.121866	0.773093	0	1	6822.11	149	0.0775278	GGTLA1	22	GGT5; GGT-REL; DKFZP566O011;	NM_004121.1	GeneID:2687		22971654
5626	cg05628549	0.110289	82.7525	82.7525	5.3058e-09	0.0213267	21844.6	149	0.0898571	0.0889621	0	1	22296.3	149	0.0531272	PRKCDBP	11	SRBC; HSRBC; MGC20400;	NM_145040.2	GeneID:112464	11:6297418-6298977	6298471
612	cg00587613	0.82716	-82.731	82.731	5.33212e-09	-0.0227487	17278.2	149	0.105662	0.849909	0	1	17259.1	149	0.0656045	GPR152	11	PGR5;	NM_206997.1	GeneID:390212		66976799
11672	cg11724759	0.723229	-82.7057	82.7057	5.3633e-09	-0.0295774	3670.8	149	0.142261	0.752806	0	1	3619.07	149	0.0972579	RPE65	1	LCA2; RP20; mRPE65; sRPE65;	NM_000329.2	GeneID:6121		68688486
19102	cg19111262	0.606826	-82.6587	82.6587	5.42166e-09	-0.0346299	11117.4	149	0.167848	0.641456	0	1	11510.7	149	0.114067	IGSF9	1	Nrt1; IGSF9A; FP18798; KIAA1355;	NM_020789.2	GeneID:57549		158182750
5264	cg05245515	0.830591	-82.6501	82.6501	5.43239e-09	-0.0224759	6802.34	149	0.0912048	0.853067	0	1	6866.56	149	0.0670648	SLC39A2	14	ZIP2;	NM_014579.1	GeneID:29986		20537113
6232	cg06263943	0.631865	-82.5438	82.5438	5.567e-09	-0.0337541	23248.5	149	0.154216	0.665619	0	1	23571.8	149	0.0963906	CACNA1H	16	CACNA1HB;	NM_021098.2	GeneID:8912		1142016
14663	cg14662756	0.827497	-82.5306	82.5306	5.58398e-09	-0.0226965	13195	149	0.109885	0.850194	0	1	12968.8	149	0.0686099	NPFF	12	FMRFAL;	NM_003717.1	GeneID:8620		52187672
3907	cg03870862	0.596845	-82.4971	82.4971	5.62722e-09	-0.0349	13252.3	149	0.1386	0.631745	0	1	13426.1	149	0.106832	ZC3H3	8	ZC3HDC3; KIAA0150;	NM_015117.1	GeneID:23144	8:144695305-144695622	144695368
5672	cg05674036	0.792256	-82.4497	82.4497	5.68891e-09	-0.0252411	9516.97	149	0.157629	0.817497	0	1	9469.32	149	0.107902	OR3A3	17	OR3A6; OR3A7; OR3A8P; OR17-16; OR17-137; OR17-201;	NM_012373.1	GeneID:8392		3270541
15874	cg15811427	0.645283	-82.3776	82.3776	5.78418e-09	-0.0332109	2235.46	149	0.168276	0.678494	0	1	2261.82	149	0.114074	FPR1	19	FPR; FMLP;	NM_002029.3	GeneID:2357		56946034
24414	cg24454579	0.726207	-82.3429	82.3429	5.83052e-09	-0.0293493	3601.09	149	0.0808126	0.755557	0	1	3715.97	149	0.0633753	BIRC8	19	ILP2; ILP-2; hILP2;	NM_033341.3	GeneID:112401	19:58485716-58486658	58486606
13961	cg13998293	0.637269	-82.3263	82.3263	5.85284e-09	-0.0335093	3207.68	149	0.175905	0.670779	0	1	3182.5	149	0.115235	TRIM63	1	IRF; SMRZ; MURF1; MURF2; RNF28; FLJ32380;	NM_032588.2	GeneID:84676		26267022
17807	cg17786776	0.599545	-82.3146	82.3146	5.86865e-09	-0.0347819	3232.25	149	0.146073	0.634327	0	1	3167.47	149	0.0965978	FKBP9	7	FKBP60; FKBP63; PPIase; MGC126772; MGC138258;	NM_007270.2	GeneID:11328	7:32962641-32964267	32962670
15001	cg15001381	0.353485	82.2991	82.2991	5.88971e-09	0.0346961	10984.7	149	0.121433	0.318789	0	1	10899.5	149	0.0924283	AXIN1	16	AXIN; MGC52315;	NM_181050.1	GeneID:8312	16:341791-343515	343315
18950	cg18959422	0.536193	-82.2923	82.2923	5.89883e-09	-0.036248	5959.28	149	0.151505	0.572441	0	1	5771.25	149	0.0988808	MYBPH	1		NM_004997.2	GeneID:4608		201411987
313	cg00295325	0.677106	-82.2899	82.2899	5.90209e-09	-0.0318357	4422.19	149	0.173168	0.708941	0	1	4496.85	149	0.112197	ABCB11	2	BSEP; PGY4; SPGP; ABC16; PFIC2; PFIC-2;	NM_003742.2	GeneID:8647		169596178
7432	cg07456201	0.688299	-82.2704	82.2704	5.92876e-09	-0.0313057	2750.06	149	0.162081	0.719605	0	1	2789.72	149	0.114785	UMOD	16	FJHN; HNFJ; THGP; MCKD2; ADMCKD2; uromodulin;	NM_001008389.1	GeneID:7369		20271212
25010	cg25032865	0.676829	-82.2528	82.2528	5.95278e-09	-0.031841	3141.65	149	0.157243	0.70867	0	1	3167.85	149	0.104114	FLJ44186	7		NM_198508.1	GeneID:346689		138821204
19118	cg19132372	0.840007	-82.211	82.211	6.01034e-09	-0.0216889	8504.04	149	0.0998057	0.861696	0	1	8650.32	149	0.064766	GPR1	2		NM_005279.2	GeneID:2825	2:206786825-206787423	206787397
4418	cg04391540	0.482506	-82.2109	82.2109	6.01048e-09	-0.0368076	22185.8	149	0.137492	0.519313	0	1	22795.8	149	0.0927976	ZNF541	19	MGC119518; MGC119519; MGC119521; DKFZp434I1930;	NM_032255.1	GeneID:84215	19:52739817-52741134	52739941
18480	cg18468844	0.638556	-82.2056	82.2056	6.01789e-09	-0.033434	2666.09	149	0.166285	0.671989	0	1	2704.61	149	0.110464	PTAFR	1	PAFR;	NM_000952.3	GeneID:5724		28376307
18840	cg18848394	0.705741	-82.162	82.162	6.07851e-09	-0.0304146	3023.17	149	0.179339	0.736155	0	1	3009.41	149	0.120963	KRTHA8	17	HA8; hHa8;	NM_006771.3	GeneID:8687		36851435
2104	cg02077702	0.714785	-82.1591	82.1591	6.08265e-09	-0.0299385	11197.4	149	0.138328	0.744723	0	1	11172.5	149	0.0852717	ISLR	15	HsT17563;	NM_005545.3	GeneID:3671		72252941
25011	cg25033144	0.900435	-82.1002	82.1002	6.16568e-09	-0.0165927	12264.1	149	0.0673722	0.917027	0	1	12382.1	149	0.0382688	FLJ00060	19		NM_033206.1	GeneID:90011		59740102
5811	cg05820087	0.721735	-82.0624	82.0624	6.21952e-09	-0.0295452	4109.68	149	0.123061	0.751281	0	1	4090.18	149	0.0845285	ATP13A4	3	MGC126545; DKFZp761I1011;	NM_032279.2	GeneID:84239		194755255
887	cg00862290	0.554914	-81.9892	81.9892	6.32521e-09	-0.0358338	3946.73	149	0.140332	0.590748	0	1	3963	149	0.099769	KCNMB3	3	KCNMB2; KCNMBL;	NM_014407.3	GeneID:27094	3:180467337-180467703	180467667
9530	cg09588653	0.573324	-81.9892	81.9892	6.32521e-09	-0.035422	5508.66	149	0.156438	0.608746	0	1	5428.99	149	0.100945	SLC6A7	5	PROT;	NM_014228.2	GeneID:6534		149549469
2265	cg02238504	0.860435	-81.9816	81.9816	6.33635e-09	-0.0200211	6508.86	149	0.104068	0.880456	0	1	6502.47	149	0.0712878	ZNF423	16	OAZ; Roaz; Ebfaz; Zfp104; KIAA0760;	NM_015069.2	GeneID:23090		48418876
10210	cg10282491	0.629076	-81.9462	81.9462	6.38828e-09	-0.0337314	16536.8	149	0.17872	0.662807	0	1	16762.8	149	0.120148	CLDN9	16		NM_020982.2	GeneID:9080		3002369
14996	cg14992253	0.0979147	81.71	81.71	6.7453e-09	0.0202024	8729.15	149	0.0777174	0.0777122	0	1	8990.3	149	0.0552601	C1orf91	1	AASL548; PRO1105; FLJ90779; RP4-622L5; dJ622L5.7; RP4-622L5.3;	NM_019118.2	GeneID:56063	1:32460114-32461366	32460154
14800	cg14799446	0.658793	-81.6675	81.6675	6.81157e-09	-0.0325208	7872.06	149	0.170449	0.691314	0	1	7888.16	149	0.106167	STRN4	19	ZIN; zinedin;	NM_013403.1	GeneID:29888		51942447
18512	cg18499731	0.664017	-81.6567	81.6567	6.82854e-09	-0.0322964	2444.76	149	0.125153	0.696313	0	1	2480.57	149	0.0993972	HBII-438B	15		NR_001289.1	GeneID:338429		23073264
8697	cg08747377	0.107236	81.6333	81.6333	6.86548e-09	0.0209442	6882.27	149	0.0913056	0.0862921	0	1	6828.87	149	0.0553028	CDH13	16	CDHH;	NM_001257.3	GeneID:1012	16:81217810-81219323	81218171
24897	cg24924779	0.101284	81.5917	81.5917	6.9315e-09	0.0204615	11768.3	149	0.0959938	0.0808227	0	1	11788.5	149	0.0563544	KCNG1	20	K13; kH2; KCNG; KV6.1; MGC12878;	NM_002237.2	GeneID:3755	20:49072343-49074019	49073405
11960	cg12008118	0.828889	-81.5477	81.5477	7.00216e-09	-0.0224596	26598.3	149	0.103261	0.851349	0	1	26455.5	149	0.0663624	LDB3	10	ZASP; CYPHER; ORACLE; PDLIM6; ldb3z4; KIAA0613; KIAA01613;	NM_007078.1	GeneID:11155		88418409
1500	cg01479232	0.637384	-81.537	81.537	7.01945e-09	-0.0333453	5283.48	149	0.17463	0.670729	0	1	5176.09	149	0.114773	C20orf54	20	MGC10698; bA371L19.1;	NM_033409.2	GeneID:113278		696992
14482	cg14477619	0.84836	-81.4445	81.4445	7.17051e-09	-0.0209339	14853.4	149	0.0837757	0.869294	0	1	14827.3	149	0.0565644	NPC1L1	7		NM_013389.1	GeneID:29881		44547406
1198	cg01182697	0.274946	81.3487	81.3487	7.33041e-09	0.0314877	5925.96	149	0.153491	0.243458	0	1	6033.69	149	0.0997692	TMEM59	1	C1orf8; HSPC001;	NM_004872.3	GeneID:9528		54293020
24245	cg24310246	0.730893	-81.1808	81.1808	7.6194e-09	-0.0288858	6205.39	149	0.129018	0.759779	0	1	6175.59	149	0.0848132	RAXL1	19	MGC15631;	NM_032753.2	GeneID:84839		3724172
6090	cg06132342	0.667439	-81.1642	81.1642	7.6486e-09	-0.0320549	14031.5	149	0.111173	0.699494	0	1	13746	149	0.0797269	KRTHB5	12	HB5; Hb-5; hHb5;	NM_002283.2	GeneID:3891	12:51046994-51047538	51047420
15692	cg15669228	0.766006	-81.1364	81.1364	7.69759e-09	-0.0267765	5936.51	149	0.128252	0.792782	0	1	6088.84	149	0.0827061	IFNA8	9		NM_002170.2	GeneID:3445		21399505
10078	cg10161121	0.566865	-81.1041	81.1041	7.75515e-09	-0.0353875	8607.91	149	0.163957	0.602253	0	1	8694.81	149	0.113526	FASLG	1	FASL; CD178; CD95L; TNFSF6; APT1LG1;	NM_000639.1	GeneID:356		170894643
4064	cg04008913	0.649786	-81.0857	81.0857	7.78804e-09	-0.0327766	11633.6	149	0.168601	0.682563	0	1	11546	149	0.106588	SNRK	3	HSNFRK; FLJ20224; KIAA0096; DKFZp779A1866;	NM_017719.3	GeneID:54861		43302469
1713	cg01684901	0.770295	-81.0279	81.0279	7.89238e-09	-0.0264859	3837.54	149	0.120299	0.796781	0	1	3819.32	149	0.080401	C3orf40	3	MGC21688;	NM_144635.3	GeneID:131408		185541099
24381	cg24430616	0.699507	-81.007	81.007	7.93047e-09	-0.0305238	3492.34	149	0.152954	0.73003	0	1	3400.02	149	0.104994	ENTPD4	8	LAP70; LALP70; LYSAL1; UDPase; KIAA0392; NTPDase-4;	NM_004901.1	GeneID:9583		23376361
6591	cg06602857	0.0846719	80.9686	80.9686	8.00087e-09	0.0190233	15689.5	149	0.0756007	0.0656486	0	1	15801.2	149	0.0497067	FOXF1	16	FKHL5; FREAC1; MGC105125;	NM_001451.1	GeneID:2294	16:85098762-85102716	85100308
26920	cg26963271	0.049464	80.9073	80.9073	8.11456e-09	0.015952	26563.3	149	0.0719743	0.033512	0	1	26961.8	149	0.0449397	PDE4B	1	DPDE4; PDEIVB; MGC126529; DKFZp686F2182;	NM_002600.2	GeneID:5142	1:66030397-66031906	66031669
25940	cg25956985	0.599957	-80.8342	80.8342	8.25234e-09	-0.0344615	6720.3	149	0.182052	0.634418	0	1	6517.29	149	0.113194	MAP3K7IP1	22	TAB1; MGC57664;	NM_153497.2	GeneID:10454		38125134
24236	cg24298280	0.641977	-80.7961	80.7961	8.32505e-09	-0.0330252	3307.17	149	0.18425	0.675003	0	1	3359.46	149	0.116494	IBRDC1	6	C6orf172; MGC26996; dJ84N20.1;	NM_152553.2	GeneID:154214		125346807
8451	cg08507270	0.713122	-80.7611	80.7611	8.39244e-09	-0.0297805	2935.22	149	0.140314	0.742902	0	1	2904.83	149	0.0941872	TAS2R8	12	T2R8; TRB5;	NM_023918.1	GeneID:50836		10852343
2883	cg02883161	0.163658	80.6986	80.6986	8.5141e-09	0.0249921	4037.99	149	0.11501	0.138665	0	1	3980.28	149	0.0788697	MSI1	12		NM_002442.2	GeneID:4440	12:119290126-119292199	119292001
14819	cg14820573	0.858752	-80.6624	80.6624	8.58531e-09	-0.0200051	11009.9	149	0.0966244	0.878757	0	1	11004.1	149	0.0597472	C16orf33	16	FLJ22940;	NM_024571.2	GeneID:79622	16:41660-44528	42121
18792	cg18790143	0.760146	-80.66	80.66	8.5901e-09	-0.0270669	9863.25	149	0.131057	0.787213	0	1	9731.31	149	0.0898898	OTOS	2	OTOSP;	NM_148961.3	GeneID:150677	2:240728933-240729160	240729137
19971	cg19985911	0.780164	-80.6578	80.6578	8.59455e-09	-0.025786	6726.15	149	0.10883	0.80595	0	1	6704.34	149	0.0685237	AVIL	12	p92; DOC6; ADVIL; FLJ12386;	NM_006576.2	GeneID:10677		56495941
27323	cg27388462	0.866876	-80.6243	80.6243	8.661e-09	-0.0193343	9115.85	149	0.0963387	0.886211	0	1	9052.67	149	0.0652992	POU5F1	6	OCT3; OTF3; OTF4; Oct4; MGC22487;	NM_002701.3	GeneID:5460		31246112
6231	cg06263495	0.125287	80.6194	80.6194	8.67078e-09	0.0222174	15180.1	149	0.117158	0.103069	0	1	15170.5	149	0.0749259	ASCL2	11	ASH2; HASH2; MASH2;	NM_005170.2	GeneID:430	11:2246594-2249861	2248580
11266	cg11328149	0.795724	-80.6033	80.6033	8.70298e-09	-0.0247282	26883.8	149	0.11374	0.820452	0	1	26939.9	149	0.0717384	LY6G6C	6	G6c; NG24; C6orf24;	NM_025261.1	GeneID:80740		31797438
10750	cg10857774	0.700034	-80.5997	80.5997	8.71028e-09	-0.0304216	26038.6	149	0.139545	0.730455	0	1	26334.8	149	0.0919017	DMPK	19	DM; DM1; DMK; DM1PK;	NM_004409.2	GeneID:1760		50978523
21930	cg21958034	0.815748	-80.4974	80.4974	8.91779e-09	-0.023294	19426.4	149	0.11399	0.839042	0	1	19657.6	149	0.076256	MST1	3	MSP; HGFL; NF15S2; D3F15S2; DNF15S2;	NM_020998.2	GeneID:4485		49700844
11766	cg11821702	0.787503	-80.471	80.471	8.97233e-09	-0.0252683	4763.58	149	0.109118	0.812771	0	1	4684.67	149	0.0730224	MLANA	9	MART1; MART-1;	NM_005511.1	GeneID:2315		5881258
11613	cg11679069	0.672861	-80.2583	80.2583	9.42252e-09	-0.0316424	3027.81	149	0.144203	0.704504	0	1	3005.48	149	0.0978778	DNAJC15	13	MCJ; HSD18; DNAJD1;	NM_013238.2	GeneID:29103	13:42494572-42494803	42494577
16499	cg16418329	0.745476	-80.2443	80.2443	9.4529e-09	-0.0278855	7187.93	149	0.127721	0.773361	0	1	7151.59	149	0.0799831	NYD-SP26	4		NM_033122.2	GeneID:85438		71235340
13569	cg13626881	0.627636	-80.1845	80.1845	9.58403e-09	-0.0334293	29940.4	149	0.168344	0.661065	0	1	30561.1	149	0.106157	ADORA1	1	RDC7;	NM_000674.1	GeneID:134		201325801
8365	cg08418111	0.471393	80.1454	80.1454	9.67077e-09	0.0363385	6204.61	149	0.139417	0.435055	0	1	6225.32	149	0.113637	LDHC	11	LDH3; LDHX; MGC111073;	NM_017448.1	GeneID:3948	11:18389965-18390649	18390321
19767	cg19784470	0.797186	-80.0556	80.0556	9.87272e-09	-0.024548	4814.94	149	0.119407	0.821734	0	1	4853.46	149	0.0891865	OR7C2	19	OR7C3; OR19-18; CIT-HSP-87M17;	NM_012377.1	GeneID:26658		14913011
5168	cg05131835	0.819984	-80.046	80.046	9.89469e-09	-0.0229231	15788	149	0.102307	0.842908	0	1	15814.4	149	0.0629882	GH2	17	GHL; GHV; GH-V; hGH-V;	NM_022556.2	GeneID:2689		59312877
21564	cg21575929	0.919045	-80.0267	80.0267	9.93871e-09	-0.0147073	24191.5	149	0.0679021	0.933752	0	1	24051.1	149	0.0483727	ADRA1B	5	ADRA1; ALPHA1BAR;	NM_000679.3	GeneID:147	5:159276719-159277117	159276859
6228	cg06256735	0.678326	-80.0009	80.0009	9.99802e-09	-0.0313473	4910.59	149	0.191757	0.709673	0	1	4764.18	149	0.129033	MFAP5	12	MP25; MAGP2;	NM_003480.2	GeneID:8076		8707161
4015	cg03969797	0.567615	-79.9726	79.9726	1.00634e-08	-0.0351268	4262.22	149	0.138969	0.602742	0	1	4021.58	149	0.118226	MKRN3	15	D15S9; RNF63; ZFP127; ZNF127; MGC88288;	NM_005664.2	GeneID:7681	15:21361624-21362006	21361757
23495	cg23538064	0.794609	-79.9703	79.9703	1.00687e-08	-0.0247116	6373.28	149	0.104505	0.819321	0	1	6234.94	149	0.0691408	CFB	6	BF; BFD; GBG; CFAB; PBF2; H2-Bf;	NM_001710.4	GeneID:629		32021254
3628	cg03604278	0.644701	-79.9055	79.9055	1.02201e-08	-0.0327422	4200.46	149	0.179423	0.677443	0	1	4082.45	149	0.114069	CIDEC	3	Fsp27; CIDE-3; FLJ20871;	NM_022094.2	GeneID:63924		9897234
27151	cg27210447	0.775205	-79.8884	79.8884	1.02603e-08	-0.0259904	6223.93	149	0.113369	0.801195	0	1	6130.77	149	0.0711566	CLCNKA	1	hClC-Ka;	NM_004070.2	GeneID:1187		16221436
2556	cg02552572	0.709016	-79.7832	79.7832	1.05119e-08	-0.0298182	3737.12	149	0.143827	0.738834	0	1	3670.34	149	0.0946676	MT4	16	MTIV;	NM_032935.1	GeneID:84560		55155247
12401	cg12473775	0.728541	-79.7832	79.7832	1.05119e-08	-0.0287744	15642.4	149	0.13255	0.757316	0	1	15767.2	149	0.084303	RHOD	11	Rho; ARHD; RHOM; RHOHP1;	NM_014578.2	GeneID:29984	11:66580635-66581321	66581226
26897	cg26928972	0.43552	79.783	79.783	1.05124e-08	0.0359302	2511.8	149	0.124927	0.39959	0	1	2462.81	149	0.095173	CSTA	3	STF1; STFA;	NM_005213.3	GeneID:1475		123526489
2142	cg02121427	0.561913	-79.7367	79.7367	1.06249e-08	-0.0352017	5626.17	149	0.174274	0.597115	0	1	5453.84	149	0.114713	LRRC15	3	LIB;	NM_130830.2	GeneID:131578		195572481
1368	cg01356829	0.26313	79.7175	79.7175	1.06721e-08	0.030623	5758.4	149	0.123279	0.232507	0	1	5766.35	149	0.0822547	IL12RB2	1	RP11-102M16.1;	NM_001559.2	GeneID:3595	1:67545435-67546605	67545484
18809	cg18807515	0.714212	-79.6552	79.6552	1.08263e-08	-0.0295245	6001.55	149	0.107317	0.743737	0	1	6244.88	149	0.0693078	PRAMEF2	1	FLJ43580; DJ845O24.3; RP5-845O24.1;	NM_023014.1	GeneID:65122		12838902
8919	cg08977028	0.836558	-79.6024	79.6024	1.09587e-08	-0.0216214	15505.1	149	0.083593	0.858179	0	1	15491	149	0.0528121	CSAG1	X	CSAGE;	NM_153478.1	GeneID:158511	X:151653717-151653951	151653733
7712	cg07745725	0.687632	-79.5999	79.5999	1.09651e-08	-0.0308393	6178.28	149	0.157159	0.718472	0	1	6314.18	149	0.0991827	PSG3	19		NM_021016.2	GeneID:5671		47937700
22160	cg22189019	0.576828	-79.5825	79.5825	1.1009e-08	-0.0348229	12920.9	149	0.120559	0.611651	0	1	13213.2	149	0.0880833	FGF22	19		NM_020637.1	GeneID:27006	19:590091-591404	591346
11943	cg11991859	0.0721477	79.3841	79.3841	1.15238e-08	0.0177917	11405.3	149	0.0750219	0.054356	0	1	11566.6	149	0.0457263	NPAS3	14	MOP6; PASD6;	NM_022123.1	GeneID:64067	14:32477318-32479136	32478278
5278	cg05256043	0.744845	-79.2719	79.2719	1.18252e-08	-0.0277594	6820.39	149	0.138142	0.772604	0	1	6882.44	149	0.088412	DCT	13	TYRP2;	NM_001922.2	GeneID:1638		93929952
18062	cg18053607	0.703787	-79.2194	79.2194	1.19691e-08	-0.029983	12112	149	0.143735	0.73377	0	1	12351.1	149	0.0975654	PIB5PA	22	PIPP; INPP5; MGC129984;	NM_014422.2	GeneID:27124		29848963
5821	cg05828624	0.808487	-79.1301	79.1301	1.22177e-08	-0.0236243	6736.12	149	0.118782	0.832112	0	1	6811.91	149	0.0813857	REG1A	2	P19; PSP; PTP; REG; ICRF; PSPS; PSPS1; MGC12447;	NM_002909.3	GeneID:5967		79201207
2902	cg02905245	0.519827	-79.1209	79.1209	1.22437e-08	-0.0357901	7305.78	149	0.129267	0.555617	0	1	7362.65	149	0.0870974	URB	3	DRO1; SSG1;	NM_199511.1	GeneID:151887		113842342
6230	cg06259570	0.770099	-78.9014	78.9014	1.28783e-08	-0.0261635	5199.33	149	0.123643	0.796263	0	1	5031.12	149	0.0831594	MMP27	11	MMP-27;	NM_022122.2	GeneID:64066		102081304
5758	cg05761971	0.621016	-78.8994	78.8994	1.28844e-08	-0.0333956	2206.48	149	0.170459	0.654412	0	1	2112.25	149	0.119922	FAM82A	2	BLOCK18; FLJ32954; FLJ38143; MGC33318; PRO34163; PYST9371;	NM_144713.1	GeneID:151393		38031181
26032	cg26055770	0.111508	78.887	78.887	1.29212e-08	0.0209393	14564	149	0.106929	0.0905689	0	1	14223.9	149	0.0655026	PDZRN3	3	LNX3; SEMACAP3;	NM_015009.1	GeneID:23024	3:73755774-73757236	73756760
14794	cg14792480	0.405046	-78.8719	78.8719	1.2966e-08	-0.0357952	16189.7	149	0.118997	0.440842	0	1	16464.4	149	0.0807605	CDH16	16		NM_004062.2	GeneID:1014		65511758
16003	cg15928132	0.826297	-78.8608	78.8608	1.29992e-08	-0.0222967	5882.93	149	0.123364	0.848593	0	1	6008.62	149	0.0812452	CCKAR	4	CCK-A; CCKRA; CCK1-R;	NM_000730.2	GeneID:886		26101476
18962	cg18971054	0.857834	-78.8302	78.8302	1.30912e-08	-0.019861	8516.8	149	0.101526	0.877695	0	1	8539.48	149	0.0771658	MGAM	7	MG; MGA;	NM_004668.1	GeneID:8972		141342228
16565	cg16495265	0.128509	78.7877	78.7877	1.322e-08	0.0222161	6278.86	149	0.0994681	0.106293	0	1	6173.9	149	0.0645293	HOXB5	17	HOX2; HU-1; HOX2A; Hox2.1; HHO.C10;	NM_002147.2	GeneID:3215	17:44025432-44027432	44026009
24759	cg24794531	0.128626	78.6716	78.6716	1.35782e-08	0.0222095	19061.3	149	0.0864546	0.106416	0	1	19371.8	149	0.0554363	TRPC1	3	TRP1; HTRP-1;	NM_003304.3	GeneID:7220	3:143925285-143926748	143926527
1256	cg01248426	0.635817	-78.5694	78.5694	1.39014e-08	-0.0328097	5603.2	149	0.19056	0.668627	0	1	5552.14	149	0.125293	ATP6V0D2	8	VMA6; ATP6D2; FLJ38708;	NM_152565.1	GeneID:245972		87180271
3884	cg03852144	0.145984	78.5372	78.5372	1.40049e-08	0.0234492	7728.29	149	0.0870145	0.122535	0	1	7586.8	149	0.0595048	GLRX	5	GRX; GRX1; MGC117407;	NM_002064.1	GeneID:2745		95185395
21383	cg21407055	0.860652	-78.5324	78.5324	1.40205e-08	-0.0195996	17787.8	149	0.109418	0.880251	0	1	17380.7	149	0.0681879	ART1	11	RT6; ART2; CD296; MGC133217;	NM_004314.1	GeneID:417		3623059
16674	cg16612699	0.830425	-78.5285	78.5285	1.40329e-08	-0.021945	13471	149	0.0899728	0.85237	0	1	13455.9	149	0.0563985	OR8B8	11	TPCR85;	NM_012378.1	GeneID:26493		123816428
17033	cg17001652	0.612268	-78.5248	78.5248	1.4045e-08	-0.0336025	2085.91	149	0.153601	0.64587	0	1	2099.42	149	0.108612	CXCL13	4	BLC; BCA1; ANGIE; BCA-1; BLR1L; ANGIE2; SCYB13;	NM_006419.1	GeneID:10563		78651427
6154	cg06194808	0.813338	-78.4438	78.4438	1.43093e-08	-0.0231819	8594.21	149	0.104727	0.83652	0	1	8827.33	149	0.0717153	MGC9712	7	FLJ24011;	NM_152689.2	GeneID:202915		1562743
24590	cg24636657	0.826352	-78.3988	78.3988	1.44583e-08	-0.0222302	6675.55	149	0.104605	0.848582	0	1	6851.69	149	0.064869	SERPINA7	X	TBG;	NM_000354.3	GeneID:6906		105167542
26207	cg26222045	0.653626	-78.3631	78.3631	1.45777e-08	-0.0320857	17129.3	149	0.152159	0.685712	0	1	17233.7	149	0.0971722	UNQ5810	16		NM_207384.1	GeneID:388218		19204357
13487	cg13553204	0.755702	-78.3406	78.3406	1.46536e-08	-0.02696	6893.84	149	0.148924	0.782662	0	1	6832.05	149	0.0942411	CNKSR1	1	CNK; KSR; CNK1;	NM_006314.1	GeneID:10256		26377135
7749	cg07785936	0.735428	-78.2612	78.2612	1.49239e-08	-0.0281272	14824.6	149	0.10026	0.763556	0	1	14799.3	149	0.0698206	GPR39	2		NM_001508.1	GeneID:2863	2:132889810-132891152	132891105
20003	cg20022122	0.726999	-78.2536	78.2536	1.49499e-08	-0.0285925	6133.95	149	0.140107	0.755592	0	1	6225.02	149	0.0886347	GCKR	2	GKRP;	NM_001486.2	GeneID:2646		27573626
18742	cg18740800	0.623293	-78.1881	78.1881	1.51771e-08	-0.0331712	2507.6	149	0.16114	0.656464	0	1	2478.67	149	0.106956	HSPCAL3	11		XM_934529.1	GeneID:3324		27871510
4004	cg03958979	0.235145	78.0729	78.0729	1.55852e-08	0.0289055	15028.5	149	0.128833	0.20624	0	1	14725.9	149	0.0793978	NR2E1	6	TLL; TLX; XTLL;	NM_003269.2	GeneID:7101	6:108591543-108597244	108593080
34	cg00031162	0.576199	-77.9554	77.9554	1.60125e-08	-0.0344924	5905.77	149	0.140756	0.610692	0	1	5944.52	149	0.0955597	TNFSF12-TNFSF13	17	TWE-PRIL;	NM_172089.2	GeneID:407977		7394101
9374	cg09440340	0.803617	-77.8575	77.8575	1.63777e-08	-0.0237828	16076	149	0.108728	0.8274	0	1	15905.3	149	0.0716943	C1orf161	1	FLJ38716; RP5-1185H19.1;	NM_152367.1	GeneID:126868		116455938
4980	cg04940435	0.119226	77.8507	77.8507	1.64034e-08	0.0213972	18087.3	149	0.0936273	0.0978286	0	1	18067.5	149	0.0623656	DNTTIP1	20	Tdif1; C20orf167; dJ447F3.4;	NM_052951.2	GeneID:116092	20:43853272-43854481	43853698
3432	cg03406535	0.187488	77.8499	77.8499	1.64064e-08	0.02611	7420.07	149	0.103621	0.161378	0	1	7510.91	149	0.062547	RBP7	1	CRBP4; CRBPIV; MGC70641;	NM_052960.1	GeneID:116362		9979544
6487	cg06500476	0.691179	-77.8255	77.8255	1.64986e-08	-0.0303407	3782.26	149	0.14894	0.72152	0	1	3752.13	149	0.0944372	FLJ11017	4		NM_018302.1	GeneID:55286		37261349
15341	cg15343119	0.137788	77.8255	77.8255	1.64986e-08	0.0227633	12464	149	0.0955711	0.115024	0	1	12463	149	0.0624832	GALR1	18	GALNR; GALNR1;	NM_001480.2	GeneID:2587	18:73090255-73093032	73090773
3439	cg03417466	0.610079	-77.7648	77.7648	1.67309e-08	-0.0335131	1927.53	149	0.156655	0.643592	0	1	1908.14	149	0.113244	TYR	11	OCA1A; OCAIA; tyrosinase;	NM_000372.3	GeneID:7299		88550066
26952	cg27000831	0.631572	-77.7179	77.7179	1.69125e-08	-0.0327882	3712.75	149	0.17962	0.66436	0	1	3743.48	149	0.116582	CCL8	17	HC14; MCP2; MCP-2; SCYA8; SCYA10;	NM_005623.2	GeneID:6355		29669861
19970	cg19984039	0.547397	-77.7125	77.7125	1.69336e-08	-0.0350506	1528.63	149	0.147625	0.582448	0	1	1480.72	149	0.109896	RGS13	1	MGC17173;	NM_002927.3	GeneID:6003		190872011
10146	cg10221501	0.871719	-77.692	77.692	1.70136e-08	-0.0186014	12359.9	149	0.0931723	0.89032	0	1	12280.8	149	0.0585104	CMTM1	16	CKLFH; CKLFH1; CKLFSF1; MGC71870;	NM_181268.1	GeneID:113540	16:65157441-65158454	65157895
23930	cg23977670	0.84387	-77.6774	77.6774	1.70709e-08	-0.0208142	26309.7	149	0.0925734	0.864684	0	1	25835.8	149	0.0608766	H19	11	ASM; BWS; ASM1; MGC4485; PRO2605; D11S813E;	NT_009237.17	GeneID:283120	11:1973035-1973716	1973424
26716	cg26756862	0.847189	-77.6091	77.6091	1.73415e-08	-0.0205495	19996.5	149	0.0914452	0.867739	0	1	20139.8	149	0.0543905	CLCN1	7	CLC1;	NM_000083.1	GeneID:1180		142723082
4088	cg04037228	0.540138	-77.5698	77.5698	1.74993e-08	-0.0351459	18613.6	149	0.167671	0.575283	0	1	18853.1	149	0.116207	LIMD1	3		NM_014240.1	GeneID:8994		45611390
26935	cg26981881	0.642685	-77.5487	77.5487	1.75845e-08	-0.0323468	2123.3	149	0.15085	0.675032	0	1	2123.82	149	0.104706	2020-12-01	9	CTS9;	NM_017418.1	GeneID:50514		116943245
970	cg00936626	0.460716	-77.4829	77.4829	1.7853e-08	-0.0358004	17794.4	149	0.126584	0.496516	0	1	17702.1	149	0.112118	PIGZ	3	SMP3; FLJ12768; MGC52163;	NM_025163.2	GeneID:80235	3:198178938-198179402	198179253
22186	cg22202141	0.785282	-77.4829	77.4829	1.7853e-08	-0.0249616	7862.25	149	0.123458	0.810244	0	1	7466.71	149	0.0814708	FCGR3A	1	CD16; FCG3; CD16a; FCGR3; IGFR3;	NM_000569.6	GeneID:2214		159787215
15116	cg15120497	0.842675	-77.4776	77.4776	1.78745e-08	-0.0208799	8877.73	149	0.0795636	0.863555	0	1	8738.73	149	0.048773	TRH	3		NM_007117.1	GeneID:7200	3:131175550-131177582	131175589
[truncated: 3,334 more rows]
