# Supplementary material for: Phenotypic Subtyping and Re-Analysis of Existing Methylation Data from Autistic Probands in Simplex Families Reveal ASD Subtype-Associated Differentially Methylated Genes and Biological Functions
Source: Int J Mol Sci. 2020 Sep 19;21(18):6877. doi: 10.3390/ijms21186877 (PMC7555936; doi:10.3390/ijms21186877)
Supplement: Supplementary file 1 [file ijms-21-06877-s001.zip › ijms-927106-supplementary/Suppl. Materials_revised MS/Table S4. Significant DAGs in combined case group.xlsx]

## Sheet: Sheet1
		Patients						Siblings
Index	TargetID	Patient.AVG_Beta	Patient.DiffScore	|Patient.DiffScore|	p-value	Patient.Delta Beta	Patient.Intensity	Control.AVG_Beta	Control.DiffScore	Control.Delta Beta	Control.Intensity	SYMBOL
92	cg00079563	0.0805428	336.928	336.928	2.02866e-34	0.0201457	14911.3	0.0603971	0	1	15213.3	ARFGAP3
4481	cg04453065	0.0859702	336.928	336.928	2.02866e-34	0.0196101	13799.9	0.0663602	0	1	13613.2	CYR61
5241	cg05221167	0.134337	336.928	336.928	2.02866e-34	0.0230885	13895.8	0.111248	0	1	14048	ZNF560
5736	cg05740244	0.723599	336.928	336.928	2.02866e-34	0.0298759	3973.37	0.693724	0	1	4068.9	LDHC
12366	cg12439899	0.11976	336.928	336.928	2.02866e-34	0.0235592	10441.7	0.0962004	0	1	10462	TFAP2A
26484	cg26521448	0.862213	-237.401	237.401	1.8192e-24	-0.024762	20955.5	0.886975	0	1	21260.2	ZC3H7A
22521	cg22552966	0.904988	-209.433	209.433	1.13944e-21	-0.0190668	23052.4	0.924055	0	1	23449.7	FLJ31196
19581	cg19584957	0.918632	-198.75	198.75	1.33361e-20	-0.0171806	25936.9	0.935813	0	1	26064.1	TTLL10
14965	cg14959707	0.807845	-174.139	174.139	3.85558e-18	-0.026239	14973.2	0.834084	0	1	15226	ZC3H7A
26705	cg26750319	0.91242	-173.598	173.598	4.36757e-18	-0.0168309	15369.9	0.929251	0	1	15520	KCNQ1
24394	cg24443136	0.878629	-171.912	171.912	6.43873e-18	-0.0199986	13748.6	0.898627	0	1	13918.5	ATP2B3
14552	cg14547335	0.859768	-160.13	160.13	9.70443e-17	-0.0210603	21269.9	0.880828	0	1	21481.6	ATP2B2
2877	cg02876062	0.858533	-158.296	158.296	1.48064e-16	-0.0210466	12510	0.87958	0	1	12688.6	FAM107B
18774	cg18771300	0.478992	-155.589	155.589	2.7609e-16	-0.0381007	9362.5	0.517093	0	1	9359.22	RHOJ
25020	cg25042226	0.880351	-154.285	154.285	3.72829e-16	-0.0189028	13970.9	0.899254	0	1	14077.2	PAX8
628	cg00613255	0.808031	-143.468	143.468	4.49977e-15	-0.0240199	20265.6	0.832051	0	1	20270.4	INS
21629	cg21633698	0.835364	-143.468	143.468	4.49977e-15	-0.0219995	12663.5	0.857364	0	1	12696.6	THY1
18169	cg18152830	0.800082	-140.332	140.332	9.26318e-15	-0.0243433	14677.5	0.824426	0	1	14859.9	TNFRSF13B
4443	cg04415689	0.836852	-140.09	140.09	9.794e-15	-0.0216246	14533.7	0.858477	0	1	14643.9	TMEM16G
19782	cg19798224	0.781569	-138.231	138.231	1.50283e-14	-0.0254034	18096.7	0.806972	0	1	18135.9	C14orf68
14365	cg14375111	0.788969	-137.597	137.597	1.73888e-14	-0.0248508	15019.3	0.81382	0	1	15178.1	TMEM43
13892	cg13928961	0.880175	-137.358	137.358	1.83726e-14	-0.0179377	8210.58	0.898113	0	1	8326.25	K6IRS3
19994	cg20015855	0.871616	-137.358	137.358	1.83726e-14	-0.0186514	10523.2	0.890267	0	1	10655.5	CORO2B
14946	cg14934821	0.803318	-137.331	137.331	1.84872e-14	-0.0238006	7710.01	0.827119	0	1	7672.48	GPSM1
24888	cg24919884	0.804986	-137.331	137.331	1.84872e-14	-0.0236962	7649.78	0.828682	0	1	7536.24	ARHGEF16
8264	cg08314660	0.896541	-131.431	131.431	7.19267e-14	-0.0162127	27024.8	0.912754	0	1	27113.4	PKP3
20890	cg20931907	0.895093	-131.431	131.431	7.19267e-14	-0.0163303	13728.5	0.911423	0	1	13831	LOC340602
16743	cg16698623	0.814051	-130.469	130.469	8.97677e-14	-0.0225278	17191.5	0.836578	0	1	17404.1	MGMT
8373	cg08424423	0.878887	-128.42	128.42	1.43883e-13	-0.0174983	12510.8	0.896385	0	1	12445.3	CDSN
14136	cg14162076	0.85964	-127.075	127.075	1.96133e-13	-0.0189342	18401.3	0.878574	0	1	18653	CLEC4D
247	cg00226923	0.793195	-126.86	126.86	2.06058e-13	-0.0236291	26596.5	0.816824	0	1	26751.3	FGD2
17299	cg17264618	0.203608	124.171	124.171	3.82719e-13	0.0259234	9747.63	0.177685	0	1	9911.8	ENTPD3
14266	cg14289985	0.13288	122.544	122.544	5.56686e-13	0.0213423	6631.39	0.111538	0	1	6794.21	ZNF471
12557	cg12619162	0.81795	-122.023	122.023	6.27654e-13	-0.0215889	11065.5	0.839539	0	1	10939	FXYD4
24836	cg24870391	0.831214	-120.163	120.163	9.63252e-13	-0.0205293	14710	0.851744	0	1	14874.8	CCL11
5242	cg05221264	0.857684	-119.385	119.385	1.15205e-12	-0.0185467	12577.3	0.876231	0	1	12650.7	ELA2A
5796	cg05800321	0.851065	-119.385	119.385	1.15205e-12	-0.0190141	17007.6	0.87008	0	1	17140.5	LY6D
10291	cg10365880	0.861503	-119.385	119.385	1.15205e-12	-0.0182377	16135.8	0.879741	0	1	16005	PKD2L1
19850	cg19859270	0.808263	-119.385	119.385	1.15205e-12	-0.0219932	6353.37	0.830256	0	1	6474.61	GPR15
21469	cg21489722	0.839314	-119.385	119.385	1.15205e-12	-0.0198823	14469.1	0.859197	0	1	14695.5	FAM9B
24373	cg24423088	0.882549	-119.286	119.286	1.17866e-12	-0.0166035	12204.2	0.899153	0	1	12560.4	KRTAP8-1
14621	cg14615807	0.810087	-119.176	119.176	1.2089e-12	-0.0218364	13102.2	0.831923	0	1	13219.9	BSND
187	cg00174500	0.806182	-117.063	117.063	1.96653e-12	-0.0219217	10950.3	0.828104	0	1	10853.1	CMTM5
5943	cg05949660	0.726647	-116.907	116.907	2.0385e-12	-0.0264711	14466.4	0.753118	0	1	14494.1	MICAL1
3719	cg03704031	0.0970174	-116.536	116.536	2.22004e-12	-0.0196463	11171.8	0.116664	0	1	11360.9	INGX
25239	cg25242557	0.160409	116.453	116.453	2.26303e-12	0.0225474	40999.1	0.137861	0	1	40702.6	PAX6
23728	cg23767977	0.851528	-116.087	116.087	2.46201e-12	-0.0187154	14913.6	0.870244	0	1	14925.5	KRT6IRS
18393	cg18389810	0.808135	-115.484	115.484	2.82859e-12	-0.0216364	5172.28	0.829772	0	1	5236.73	C14orf8
13285	cg13350783	0.811262	-115.006	115.006	3.15791e-12	-0.0213901	13682.8	0.832652	0	1	13843.6	KRT13
4617	cg04567009	0.833229	-114.219	114.219	3.78556e-12	-0.0198579	14562.1	0.853086	0	1	14193	FCGR3B
4278	cg04256470	0.883392	-113.313	113.313	4.66337e-12	-0.0161376	13086.4	0.89953	0	1	13320.1	CORT
21987	cg22021786	0.843898	-113.312	113.312	4.66477e-12	-0.0190414	10934.5	0.86294	0	1	10985.6	WFDC8
8772	cg08815403	0.773027	-113.099	113.099	4.89948e-12	-0.0235504	7067.21	0.796577	0	1	7186.09	HSD17B13
25918	cg25943276	0.810728	-112.539	112.539	5.57301e-12	-0.0212011	10882	0.831929	0	1	11003.8	C11orf39
11393	cg11465372	0.81558	-112.151	112.151	6.09397e-12	-0.0208518	14905.8	0.836432	0	1	15130.8	KRT2B
3683	cg03665605	0.826699	-111.792	111.792	6.61866e-12	-0.0200869	6949.37	0.846786	0	1	7133.59	ATP5J2
22998	cg23037403	0.158045	111.56	111.56	6.98297e-12	0.0219251	19215	0.13612	0	1	19162.2	ZNF454
2280	cg02248486	0.697293	-110.619	110.619	8.67142e-12	-0.0271121	10896.3	0.724405	0	1	10969.3	HOXA5
9135	cg09196942	0.705706	-110.381	110.381	9.15946e-12	-0.0266955	8153.77	0.732402	0	1	8283.35	PRAMEF1
11473	cg11536940	0.127155	110.381	110.381	9.15946e-12	0.0198315	9367	0.107323	0	1	9464.57	PGCP
11753	cg11811840	0.79378	-110.381	110.381	9.15946e-12	-0.0220422	7779.33	0.815822	0	1	7804.96	UGT1A1
14100	cg14127336	0.768013	-110.264	110.264	9.40979e-12	-0.0235219	25589.6	0.791535	0	1	25649.2	TCL1A
17853	cg17827767	0.752501	-110.264	110.264	9.40979e-12	-0.0243689	11124.4	0.776869	0	1	11166.1	LRRC21
13184	cg13266631	0.133212	110.259	110.259	9.42085e-12	0.0201981	6772.19	0.113014	0	1	6837.12	NEFL
16064	cg15983005	0.81271	-110.259	110.259	9.42085e-12	-0.0208337	8495.25	0.833544	0	1	8589.17	KRTHA3A
16529	cg16462075	0.819798	-110.244	110.244	9.45453e-12	-0.0203708	11995.9	0.840168	0	1	12033.2	MUC3B
15226	cg15233681	0.815827	-110.105	110.105	9.76135e-12	-0.0206116	5424.43	0.836438	0	1	5376.23	IL1R1
5598	cg05594230	0.104407	-109.569	109.569	1.10441e-11	-0.0195086	7732.27	0.123915	0	1	7717.37	INGX
7412	cg07440877	0.858476	-109.569	109.569	1.10441e-11	-0.0176703	17507	0.876146	0	1	17594.5	FLJ46358
10250	cg10321723	0.882756	-109.569	109.569	1.10441e-11	-0.0158833	12359.8	0.89864	0	1	12437.2	PDZK1
13021	cg13099330	0.1724	109.275	109.275	1.1816e-11	0.0225137	11818.9	0.149886	0	1	11688.3	RBP1
15517	cg15520279	0.0763949	108.055	108.055	1.56491e-11	0.0160391	17585.8	0.0603558	0	1	17279.7	HOXD8
16439	cg16359129	0.845299	-107.79	107.79	1.66341e-11	-0.0184542	8242.41	0.863753	0	1	8254.74	C1orf111
4041	cg03993463	0.872779	-107.723	107.723	1.68943e-11	-0.0164968	15040.6	0.889276	0	1	15117.5	KCNJ15
18250	cg18241647	0.791731	-107.693	107.693	1.70106e-11	-0.0218652	10841.3	0.813596	0	1	11091.5	WFDC12
8378	cg08430598	0.853195	-107.203	107.203	1.90436e-11	-0.0178547	13555	0.871049	0	1	13646.7	CST1
17417	cg17391877	0.810503	-107.093	107.093	1.95303e-11	-0.0206589	9632.31	0.831162	0	1	9540.05	PGC
26779	cg26808784	0.889473	-107.093	107.093	1.95303e-11	-0.0152037	9274.8	0.904677	0	1	9262.19	H19
7125	cg07125166	0.809157	-106.942	106.942	2.02223e-11	-0.0207261	10070.6	0.829884	0	1	10214.6	FBXW12
3359	cg03343942	0.81578	-106.65	106.65	2.16282e-11	-0.0202836	12621.9	0.836064	0	1	12806.4	SLC39A5
14071	cg14102807	0.768727	-106.434	106.434	2.27306e-11	-0.0230415	15873.5	0.791769	0	1	16086.2	CD19
12359	cg12435792	0.799837	-106.286	106.286	2.35201e-11	-0.0212297	17135.7	0.821067	0	1	17304.1	PDE6B
3347	cg03330516	0.737225	-106.163	106.163	2.41936e-11	-0.0246524	18248.7	0.761877	0	1	18349	SRMS
20132	cg20154346	0.784096	-106.044	106.044	2.48634e-11	-0.0221279	7190.69	0.806224	0	1	7204.98	RAI2
23763	cg23815000	0.797404	-104.837	104.837	3.28299e-11	-0.0212412	12499.7	0.818646	0	1	12478.5	LCN1
23707	cg23749046	0.791252	-104.521	104.521	3.53086e-11	-0.0215726	6543.18	0.812825	0	1	6531.64	GPR61
1890	cg01870826	0.185595	104.332	104.332	3.68825e-11	0.0227438	11062.6	0.162852	0	1	11087.7	LOC389458
2869	cg02868123	0.809368	-104.247	104.247	3.76106e-11	-0.0204566	24696.6	0.829824	0	1	24569.1	REGL
22376	cg22407458	0.1042	104.189	104.189	3.81171e-11	0.0177099	15889.7	0.0864903	0	1	15677.5	TCP11
5118	cg05073035	0.148051	103.234	103.234	4.74919e-11	0.0204672	11763.9	0.127584	0	1	12022.5	ZIC1
5121	cg05078019	0.820343	-102.843	102.843	5.19589e-11	-0.0196505	15719.1	0.839993	0	1	15783.6	PDE6B
15	cg00013618	0.761921	-102.679	102.679	5.3961e-11	-0.0230129	9738.41	0.784934	0	1	9772.76
13073	cg13156121	0.821048	-102.648	102.648	5.43551e-11	-0.0195832	15679.8	0.840631	0	1	15817.9	TEPP
26075	cg26099316	0.791045	-102.484	102.484	5.64456e-11	-0.0213752	15324.7	0.812421	0	1	15334.1	ITIH3
2164	cg02148642	0.772863	-102.365	102.365	5.8015e-11	-0.0223826	7223.35	0.795246	0	1	7223.3	RGPD5
15111	cg15113803	0.829123	-102.222	102.222	5.9946e-11	-0.0190232	17205.9	0.848146	0	1	17467.7	RHO
19120	cg19133618	0.0929723	102.222	102.222	5.9946e-11	0.0167732	10693.5	0.076199	0	1	10686.2	CDKN2B
10904	cg10994126	0.73337	-101.968	101.968	6.35594e-11	-0.0243554	9771.27	0.757725	0	1	9894.02	PAPPA2
19508	cg19516009	0.788334	-101.375	101.375	7.28585e-11	-0.021413	4539.4	0.809747	0	1	4570.6	SFTPC
25068	cg25087423	0.755088	-101.375	101.375	7.28585e-11	-0.0232115	11850.7	0.7783	0	1	12107.8	BLR1
9966	cg10052840	0.752218	-101.01	101.01	7.92465e-11	-0.023319	20324.1	0.775537	0	1	20231.1	SEMA6B
3285	cg03270204	0.785371	-100.909	100.909	8.11166e-11	-0.0215294	8938.08	0.806901	0	1	8845.91	DDR1
10329	cg10409560	0.783013	-100.71	100.71	8.4922e-11	-0.0216402	7353.11	0.804653	0	1	7483.68	FLJ23657
25201	cg25203856	0.684216	-100.505	100.505	8.90225e-11	-0.0263107	7296.21	0.710527	0	1	7604	NALP14
14123	cg14153740	0.798234	-100.443	100.443	9.02984e-11	-0.02074	6797.72	0.818974	0	1	6874.78	TRY1
6009	cg06037693	0.770408	-100.17	100.17	9.61701e-11	-0.0222697	16242.8	0.792678	0	1	16431.3	RUNX3
3871	cg03842617	0.844723	-100.092	100.092	9.79039e-11	-0.0178129	23589.7	0.862536	0	1	23601.7	NOS3
24403	cg24447890	0.891618	-100.092	100.092	9.79039e-11	-0.014542	21305.8	0.90616	0	1	21521.1	LMAN1L
23096	cg23128056	0.759548	-99.8409	99.8409	1.03731e-10	-0.0227993	12829.6	0.782348	0	1	12895.7	KRT15
18568	cg18557145	0.766218	-99.675	99.675	1.0777e-10	-0.0224277	15216.8	0.788646	0	1	15147.6	CD72
21623	cg21627181	0.800442	-99.675	99.675	1.0777e-10	-0.0205252	7487.7	0.820967	0	1	7560.93	SLC17A4
14397	cg14404298	0.749168	-99.3394	99.3394	1.16428e-10	-0.0232663	7497.76	0.772434	0	1	7556.17	CYP8B1
8594	cg08649013	0.772807	-98.9891	98.9891	1.26208e-10	-0.0220057	7963.44	0.794812	0	1	8147.53	SLC2A9
1444	cg01429391	0.838323	-98.928	98.928	1.27998e-10	-0.0181239	12042.9	0.856447	0	1	12215	MYH7
13550	cg13614083	0.712271	-98.928	98.928	1.27998e-10	-0.0249344	4758.39	0.737205	0	1	4741.79	KCNAB2
26567	cg26609631	0.0974087	98.5766	98.5766	1.38783e-10	0.0167708	14623.8	0.080638	0	1	14841.9	GSH1
19708	cg19728577	0.81203	-98.3737	98.3737	1.45421e-10	-0.0197084	12764.8	0.831738	0	1	12544.9	GUCA2B
19186	cg19196684	0.857937	-98.2205	98.2205	1.50643e-10	-0.0167682	25147.8	0.874705	0	1	25113	SLC1A7
474	cg00463848	0.770635	-98.0404	98.0404	1.57023e-10	-0.0220053	3813.43	0.79264	0	1	3843.23	KRT2A
12149	cg12215675	0.853275	-98.0404	98.0404	1.57023e-10	-0.0170611	14981.1	0.870336	0	1	15507.8	TTLL2
13172	cg13259290	0.773113	-98.0404	98.0404	1.57023e-10	-0.0218769	16226.9	0.79499	0	1	16259.3	CSF2
20684	cg20732137	0.800403	-97.8107	97.8107	1.6555e-10	-0.0203303	13830.1	0.820733	0	1	13869.7	GMEB2
3747	cg03731616	0.148317	97.239	97.239	1.88842e-10	0.0198642	8208.84	0.128453	0	1	8341.62	MYLK
20782	cg20832009	0.18768	97.239	97.239	1.88842e-10	0.022055	11300.4	0.165625	0	1	11512	STARD8
1497	cg01474260	0.765371	-97.049	97.049	1.97287e-10	-0.0221741	12273.5	0.787546	0	1	12414	CESK1
15751	cg15727249	0.71442	-96.9838	96.9838	2.00272e-10	-0.0245924	6791.61	0.739012	0	1	6870.65	APOA4
15982	cg15905124	0.775839	-96.8461	96.8461	2.06721e-10	-0.0215965	10034.6	0.797435	0	1	10234.5	MGC13034
23716	cg23753610	0.918019	-96.8411	96.8411	2.06964e-10	-0.0123324	13787.5	0.930352	0	1	13872.2	DNAHL1
5618	cg05615487	0.754385	-96.7036	96.7036	2.13617e-10	-0.022687	9480.42	0.777072	0	1	9662.97	ACR
12004	cg12061127	0.82558	-96.5843	96.5843	2.19566e-10	-0.0187001	10050.1	0.84428	0	1	10147.1	WFDC9
23735	cg23773532	0.810331	-96.5836	96.5836	2.19603e-10	-0.0196177	11022.1	0.829949	0	1	11180.4	GPRC5D
10043	cg10127415	0.779813	-96.3215	96.3215	2.33264e-10	-0.0213123	10289.5	0.801126	0	1	10586.3	MAGEB6
14705	cg14704941	0.833704	-96.3215	96.3215	2.33264e-10	-0.0181642	5867.01	0.851868	0	1	5902.02	CSRP3
23530	cg23580945	0.76259	-96.3215	96.3215	2.33264e-10	-0.02222	12110.7	0.78481	0	1	12135.6	FLJ43826
6800	cg06811800	0.81901	-96.1506	96.1506	2.42629e-10	-0.019052	6056.98	0.838062	0	1	6093.46	ATP4B
17709	cg17703324	0.837623	-96.0677	96.0677	2.47303e-10	-0.0178911	7212.17	0.855514	0	1	7319.68	OPTC
26670	cg26709720	0.768757	-95.9205	95.9205	2.5583e-10	-0.0218523	4207.93	0.790609	0	1	4201.55	B3GALT5
27425	cg27495908	0.731082	-95.3607	95.3607	2.91025e-10	-0.0236368	5328.95	0.754719	0	1	5448.98	C9orf79
13095	cg13180098	0.748251	-95.2026	95.2026	3.01817e-10	-0.0228077	5455.93	0.771059	0	1	5535.95	RHO
17715	cg17706173	0.814645	-94.9975	94.9975	3.16409e-10	-0.0192037	12156.9	0.833848	0	1	12021	C16orf30
1434	cg01423840	0.788545	-94.5837	94.5837	3.48041e-10	-0.0206502	6761.95	0.809195	0	1	6831.42	FATE1
7413	cg07441143	0.768604	-94.5837	94.5837	3.48041e-10	-0.0217114	18374	0.790315	0	1	18380.5	SLURP1
21343	cg21367957	0.86153	-94.5837	94.5837	3.48041e-10	-0.0162072	18425.5	0.877737	0	1	18483.8	F10
26508	cg26538442	0.784826	-94.5837	94.5837	3.48041e-10	-0.0208512	10499.2	0.805678	0	1	10595.6	FLJ21736
5699	cg05700681	0.797656	-94.4644	94.4644	3.57732e-10	-0.0201262	7165.88	0.817782	0	1	7221.61	CCL22
9311	cg09390792	0.80943	-94.4644	94.4644	3.57732e-10	-0.0194495	5577.29	0.828879	0	1	5639.99	TSPAN18
22590	cg22627427	0.851913	-94.4485	94.4485	3.59045e-10	-0.0168246	9219.46	0.868738	0	1	9291.22	C11orf9
21933	cg21960110	0.76727	-93.9012	93.9012	4.07271e-10	-0.0217027	9106.87	0.788973	0	1	9190.98	HBZ
13851	cg13897627	0.750126	-93.7951	93.7951	4.17336e-10	-0.0225447	11904	0.772671	0	1	12075.3	FLJ44674
9788	cg09871315	0.228193	93.3184	93.3184	4.65757e-10	0.0235433	13480.7	0.204649	0	1	13719.3	HOXA2
4264	cg04237003	0.760718	-93.2897	93.2897	4.68849e-10	-0.0219665	14577.4	0.782685	0	1	14695.1	C11orf9
4235	cg04201347	0.764973	-93.2047	93.2047	4.78109e-10	-0.0217408	17063.2	0.786714	0	1	17104.3	PRRG2
17298	cg17264470	0.865709	-92.8005	92.8005	5.24742e-10	-0.015783	11251.8	0.881492	0	1	11364	FGF21
18027	cg18008766	0.132651	92.5213	92.5213	5.59589e-10	0.0184571	11746.7	0.114193	0	1	11779.4	SFRS7
21943	cg21970438	0.843463	-92.08	92.08	6.19445e-10	-0.0171685	8964.45	0.860631	0	1	9028.15	TTLL2
22266	cg22294577	0.847865	-91.8527	91.8527	6.52722e-10	-0.0168702	17231.4	0.864735	0	1	17165.9	SLC26A3
2599	cg02601403	0.849647	-91.4589	91.4589	7.14681e-10	-0.0167246	21311.3	0.866372	0	1	21029.1	TBC1D3C
16437	cg16358738	0.829178	-91.3523	91.3523	7.32431e-10	-0.0179859	21540.9	0.847163	0	1	21613.7	AGXT
15993	cg15916061	0.793185	-91.2037	91.2037	7.57932e-10	-0.0200445	13559.3	0.81323	0	1	13765.6	SLC17A4
19302	cg19308222	0.175686	91.1971	91.1971	7.5909e-10	0.0207453	4973.31	0.154941	0	1	5057.33	EREG
5230	cg05208153	0.823413	-91.1913	91.1913	7.60104e-10	-0.0183117	22830.5	0.841725	0	1	22917	C9orf24
15546	cg15543551	0.185555	91.0031	91.0031	7.93763e-10	0.0212284	12468	0.164327	0	1	12307.2	FGF12
16528	cg16456919	0.821732	-91.0031	91.0031	7.93763e-10	-0.0183912	10932.3	0.840123	0	1	11009.2	LRRN5
21116	cg21148892	0.816942	-91.0031	91.0031	7.93763e-10	-0.0186706	18503.4	0.835612	0	1	18402.8	CLEC4F
25773	cg25802093	0.13152	90.5847	90.5847	8.74033e-10	0.0182029	12469.5	0.113317	0	1	12534.1	SPAG6
8774	cg08816023	0.804877	-90.4853	90.4853	8.94273e-10	-0.0193132	16739.4	0.82419	0	1	16782.1	FGF1
25971	cg25993152	0.727698	-90.2527	90.2527	9.43481e-10	-0.0231599	3094.6	0.750858	0	1	3132.31	XAGE5
6859	cg06862644	0.849408	-90.2031	90.2031	9.54318e-10	-0.0166214	14994.5	0.866029	0	1	15063.5	SPATA22
25102	cg25112191	0.680605	-89.6274	89.6274	1.08957e-09	-0.0249715	22429.2	0.705577	0	1	22531.6	RORC
4922	cg04875162	0.145232	89.6252	89.6252	1.09013e-09	0.0189077	6425.99	0.126324	0	1	6485.35	PABPC5
19632	cg19642007	0.798289	-89.2001	89.2001	1.20222e-09	-0.0195521	10475.4	0.817841	0	1	10413.9	TNNT3
25205	cg25211252	0.711338	-89.1258	89.1258	1.22298e-09	-0.0237176	20387	0.735056	0	1	20866.1	KCNMB3
7122	cg07123548	0.818301	-89.0062	89.0062	1.25712e-09	-0.0184001	30805.4	0.836701	0	1	30766	HIPK4
24087	cg24127989	0.0949626	88.9539	88.9539	1.27236e-09	0.0157876	13995.9	0.079175	0	1	14117.9	IMPDH1
1791	cg01772980	0.766624	-88.503	88.503	1.41155e-09	-0.021133	8056.42	0.787757	0	1	8080.42	SCGB1D1
5590	cg05590982	0.76551	-88.0255	88.0255	1.57562e-09	-0.0211378	7800.35	0.786648	0	1	7731.33	P8
9652	cg09722555	0.856638	-87.8605	87.8605	1.63663e-09	-0.0159671	15932.5	0.872605	0	1	15704.9	CCL27
8192	cg08244028	0.747299	-87.4924	87.4924	1.7814e-09	-0.0219508	5207.06	0.76925	0	1	5286	MSH3
13835	cg13881341	0.76514	-87.426	87.426	1.80886e-09	-0.0210884	10361.3	0.786229	0	1	10387.7	FUT1
24266	cg24330042	0.148469	87.222	87.222	1.89585e-09	0.0188541	8738.43	0.129614	0	1	9086.98	GSTT1
7396	cg07426848	0.756771	-87.2085	87.2085	1.90173e-09	-0.0214674	20309.3	0.778238	0	1	20512	S100A3
845	cg00823148	0.706648	-86.9879	86.9879	2.00082e-09	-0.0236373	7327.68	0.730286	0	1	7374.1	CRYGB
4178	cg04126866	0.765209	-86.9879	86.9879	2.00082e-09	-0.0210311	22088.9	0.78624	0	1	22188.9	C10orf99
3020	cg03003745	0.806898	-86.4669	86.4669	2.25584e-09	-0.018799	15202	0.825697	0	1	15236.1	UNQ473
13081	cg13164309	0.690741	-86.3914	86.3914	2.29539e-09	-0.0241733	5600.29	0.714914	0	1	5632.08	CDA
20800	cg20851097	0.663848	-86.3796	86.3796	2.30164e-09	-0.0251109	7924.36	0.688959	0	1	7834.36	SPTB
14660	cg14659547	0.786972	-86.2409	86.2409	2.37636e-09	-0.019845	10330.2	0.806817	0	1	10294.6	RETNLB
3898	cg03860768	0.691411	-86.2042	86.2042	2.3965e-09	-0.0241165	6918.8	0.715527	0	1	7043.75	BLK
9961	cg10046892	0.826423	-86.2042	86.2042	2.3965e-09	-0.0176542	17659.3	0.844077	0	1	17864.7	PAQR6
17332	cg17301902	0.12811	86.1299	86.1299	2.43788e-09	0.0175743	13545.2	0.110535	0	1	13614.6	GNA14
1105	cg01091565	0.773768	-86.1218	86.1218	2.44243e-09	-0.0205007	12181.9	0.794269	0	1	12131.1	MESP1
13327	cg13397379	0.830961	-85.9071	85.9071	2.56618e-09	-0.017357	11983.8	0.848318	0	1	11988.7	OR2C3
16917	cg16879596	0.778321	-85.8724	85.8724	2.58679e-09	-0.0202417	12108.8	0.798562	0	1	12133.5	CYP3A5
12462	cg12537796	0.142008	85.7879	85.7879	2.63759e-09	0.0183333	10462.4	0.123675	0	1	10594.2
26204	cg26220985	0.774129	-85.7879	85.7879	2.63759e-09	-0.0204405	8435.36	0.79457	0	1	8598.16	DPT
13111	cg13201322	0.756798	-85.7382	85.7382	2.66794e-09	-0.0212783	3627.62	0.778076	0	1	3694.84	MAGEB1
25545	cg25545210	0.785261	-85.6613	85.6613	2.71561e-09	-0.0198563	7628.06	0.805118	0	1	7654.87	KRTHA4
11368	cg11435943	0.765194	-85.5088	85.5088	2.81266e-09	-0.0208469	7333.75	0.786041	0	1	7392.7	SERPINB12
16717	cg16660041	0.770026	-84.9475	84.9475	3.20077e-09	-0.0205512	6916.88	0.790577	0	1	7013.36	IQCF1
3265	cg03245641	0.688964	-84.646	84.646	3.43084e-09	-0.0239921	20360.6	0.712956	0	1	20617.4	GPHA2
26334	cg26354398	0.81281	-83.8949	83.8949	4.07863e-09	-0.0182036	10362	0.831013	0	1	10397.6	RGS3
13324	cg13396068	0.761295	-83.4318	83.4318	4.53757e-09	-0.0208113	6005.81	0.782106	0	1	6099.34	DCD
18005	cg17983307	0.755709	-83.3297	83.3297	4.64548e-09	-0.0210613	21049.9	0.77677	0	1	21037.1	DKFZp434B1231
24795	cg24824840	0.810084	-83.2709	83.2709	4.70879e-09	-0.0182917	10202.7	0.828375	0	1	10173.8	SHANK1
4866	cg04806409	0.882732	-83.2191	83.2191	4.76533e-09	-0.0138943	13004.4	0.896626	0	1	13035	TFF3
23461	cg23506842	0.172826	83.1802	83.1802	4.80819e-09	0.0197141	25054	0.153112	0	1	25386.1	PTPN7
16349	cg16270990	0.701535	-83.0405	83.0405	4.96541e-09	-0.0233151	17788.8	0.72485	0	1	18197.2	C11orf44
4856	cg04797496	0.758296	-82.6344	82.6344	5.45205e-09	-0.020856	7492.94	0.779152	0	1	7496.79	PCDH12
299	cg00280814	0.781562	-82.5487	82.5487	5.56066e-09	-0.0197145	10816.1	0.801276	0	1	10882.4	FLJ31568
11621	cg11688469	0.733408	-82.5303	82.5303	5.58432e-09	-0.0219574	12089.6	0.755365	0	1	12110.7	TNNI1
27426	cg27496506	0.751449	-82.3544	82.3544	5.81518e-09	-0.0211363	8823.02	0.772585	0	1	8861.95	TGM5
3873	cg03843951	0.790435	-82.1681	82.1681	6.07002e-09	-0.0192186	21534.5	0.809654	0	1	21668.5	DDC
24748	cg24789424	0.852648	-82.1073	82.1073	6.15564e-09	-0.0157084	8359.03	0.868356	0	1	8389.22	BDH
26161	cg26174752	0.152494	81.8958	81.8958	6.46271e-09	0.0185146	9021.88	0.133979	0	1	9146.3	GPR63
9583	cg09638834	0.179475	81.8228	81.8228	6.57239e-09	0.0198924	6661.66	0.159583	0	1	6676.59	RAET1L
9773	cg09863066	0.622526	-81.8227	81.8227	6.57242e-09	-0.0256525	25407.1	0.648178	0	1	25562.1	PVALB
6226	cg06255227	0.875943	-81.7647	81.7647	6.66081e-09	-0.0142165	17432.3	0.890159	0	1	17390.2	NPBWR2
6502	cg06509940	0.818406	-81.696	81.696	6.76704e-09	-0.017662	5678.38	0.836068	0	1	5876.48	CD80
24914	cg24939733	0.758803	-81.696	81.696	6.76704e-09	-0.0207096	4497.95	0.779513	0	1	4567.78	FLJ38159
574	cg00554173	0.786675	-81.6848	81.6848	6.78447e-09	-0.0193445	12126.7	0.80602	0	1	12265	ProSAPiP1
11032	cg11113534	0.867319	-81.6848	81.6848	6.78447e-09	-0.0147545	6444.23	0.882073	0	1	6566.47	C20orf70
13097	cg13181019	0.705177	-81.6848	81.6848	6.78447e-09	-0.0229803	4779.37	0.728158	0	1	4836.94	MPP7
8280	cg08332212	0.76408	-81.0109	81.0109	7.92339e-09	-0.0203815	5178.37	0.784461	0	1	5190.66	MLN
26085	cg26111757	0.753828	-80.9633	80.9633	8.01064e-09	-0.0208505	7523.25	0.774678	0	1	7674.45	C20orf185
25828	cg25852472	0.762794	-80.8723	80.8723	8.18024e-09	-0.0204234	18733.5	0.783217	0	1	18750	H19
14514	cg14519000	0.876431	-80.8628	80.8628	8.19813e-09	-0.0141074	23844.1	0.890538	0	1	23924.3	GATA5
26249	cg26259363	0.761332	-80.6641	80.6641	8.58211e-09	-0.0204659	5646.58	0.781797	0	1	5658.17	DES
7029	cg07039113	0.833579	-80.6075	80.6075	8.69457e-09	-0.0166904	12822.1	0.850269	0	1	12911.5	S100A9
25911	cg25936385	0.850456	-80.5268	80.5268	8.85764e-09	-0.0156893	6409.04	0.866145	0	1	6504.09	FAIM2
7416	cg07443748	0.775917	-80.4973	80.4973	8.91801e-09	-0.0197457	12810.1	0.795662	0	1	12669.6	CESK1
22000	cg22035229	0.841331	-80.4714	80.4714	8.97137e-09	-0.0162234	9688.77	0.857554	0	1	9877.23	MSH4
8628	cg08684473	0.857428	-80.3844	80.3844	9.15288e-09	-0.0152499	24558.7	0.872677	0	1	24713	LILRB5
22166	cg22190114	0.84805	-80.3844	80.3844	9.15288e-09	-0.015816	6596.93	0.863866	0	1	6702.26	NALP8
3765	cg03742272	0.823529	-80.1196	80.1196	9.72828e-09	-0.017208	14419.7	0.840737	0	1	14391.9	ALOX12B
25338	cg25358289	0.262879	79.9208	79.9208	1.01841e-08	0.0231966	9735.09	0.239682	0	1	9820.48	CD14
4191	cg04138756	0.750934	-79.8596	79.8596	1.03286e-08	-0.0208374	16573.3	0.771771	0	1	16790.2	SPRR3
20441	cg20485165	0.744065	-79.7896	79.7896	1.04965e-08	-0.0211319	15795.9	0.765197	0	1	15976.6	WFDC12
23637	cg23679724	0.717576	-79.7896	79.7896	1.04965e-08	-0.0222378	23962.7	0.739814	0	1	24359.7	CTSZ
23980	cg24027679	0.850036	-79.7185	79.7185	1.06696e-08	-0.0156339	6622.49	0.86567	0	1	6663.89	SLC2A7
17801	cg17778120	0.824028	-79.5805	79.5805	1.10142e-08	-0.0171221	7088.81	0.84115	0	1	7147.28	RBP2
8357	cg08411049	0.834339	-79.5687	79.5687	1.1044e-08	-0.0165365	14948.2	0.850875	0	1	15000.1	SERPINB5
8403	cg08453096	0.840406	-79.4041	79.4041	1.14708e-08	-0.0161706	10186.5	0.856577	0	1	10328.3	ABCG5
16646	cg16581199	0.772255	-79.29	79.29	1.1776e-08	-0.0197736	7966.8	0.792029	0	1	7977.76	TSSK1
15466	cg15465321	0.785764	-79.1961	79.1961	1.20334e-08	-0.0191011	9006.38	0.804865	0	1	9225.49	PEPP-2
3851	cg03819692	0.804034	-79.1137	79.1137	1.22638e-08	-0.0181544	11718	0.822189	0	1	11772.1	FLJ36701
22954	cg22988566	0.814548	-79.0772	79.0772	1.23674e-08	-0.0175877	15845.5	0.832136	0	1	16004.4	WFDC10B
24338	cg24389347	0.799877	-79.0537	79.0537	1.24345e-08	-0.0183626	10880.8	0.81824	0	1	10956.5	C3orf22
25527	cg25527547	0.821556	-78.8893	78.8893	1.29143e-08	-0.0171841	8226.74	0.83874	0	1	8264.26	PLOD3
21436	cg21457804	0.816368	-78.7397	78.7397	1.33668e-08	-0.0174529	4410.89	0.833821	0	1	4497.14	CT45-2
6490	cg06501790	0.813793	-78.4829	78.4829	1.41812e-08	-0.0175668	6759.54	0.83136	0	1	6835.85	SLC34A1
8799	cg08834018	0.739023	-78.4011	78.4011	1.44508e-08	-0.0211674	4691.84	0.76019	0	1	4583.36	PRODH
10749	cg10857345	0.784681	-78.2198	78.2198	1.50669e-08	-0.0190423	9061.27	0.803723	0	1	9195.62	TEX13B
12148	cg12213910	0.744745	-78.1825	78.1825	1.51968e-08	-0.0208924	7222.56	0.765638	0	1	7273.24	RAET1E
25043	cg25061755	0.783706	-77.9896	77.9896	1.5887e-08	-0.0190635	21318.6	0.802769	0	1	21424.4	STON1
14673	cg14672680	0.870229	-77.9253	77.9253	1.61239e-08	-0.0142422	18450.7	0.884471	0	1	18491.3	TNNI2
1552	cg01530101	0.176397	77.8898	77.8898	1.62564e-08	0.0192605	27995.7	0.157136	0	1	27596.5	KCNQ1DN
8581	cg08634464	0.237316	77.8898	77.8898	1.62564e-08	0.0219433	2274.24	0.215373	0	1	2766.07	LOC126295
26622	cg26657648	0.766991	-77.8372	77.8372	1.64544e-08	-0.0198425	4608.2	0.786833	0	1	4626.06	IL1R1
10490	cg10569414	0.838196	-77.7215	77.7215	1.68985e-08	-0.0161274	16577.2	0.854323	0	1	16490	C21orf121
11694	cg11750883	0.738294	-77.7215	77.7215	1.68985e-08	-0.0211022	10626.6	0.759396	0	1	10674.3	C1orf42
16603	cg16529592	0.663877	-77.7215	77.7215	1.68985e-08	-0.0238375	11366.2	0.687715	0	1	11486.4	RUNX3
17439	cg17410236	0.0716736	77.6805	77.6805	1.7059e-08	0.0133436	16998.1	0.05833	0	1	17317.3	FLRT2
19861	cg19868730	0.808737	-77.6743	77.6743	1.70834e-08	-0.0177398	7794.73	0.826477	0	1	7811.77	POPDC2
18546	cg18534730	0.645204	-77.6256	77.6256	1.7276e-08	-0.0243724	9080.97	0.669576	0	1	9104.59	CABP5
2924	cg02919422	0.17985	77.5951	77.5951	1.73975e-08	0.0193828	18158.1	0.160468	0	1	18373.3	SOX17
9964	cg10051054	0.805871	-77.2881	77.2881	1.86721e-08	-0.0178457	6987.71	0.823716	0	1	7233.42	CCDC27
13592	cg13652336	0.180321	77.2881	77.2881	1.86721e-08	0.0193681	12132	0.160953	0	1	12363.6	DEPDC2
14900	cg14894216	0.694371	-77.2881	77.2881	1.86721e-08	-0.0227525	5450.16	0.717124	0	1	5507.26	CATSPER1
15990	cg15913671	0.747416	-77.2486	77.2486	1.88427e-08	-0.020642	13766.2	0.768058	0	1	13722.7	TMEM105
20059	cg20082641	0.84451	-77.2165	77.2165	1.89823e-08	-0.0157073	6549.06	0.860217	0	1	6639.19	PAQR5
23784	cg23834593	0.747142	-77.2128	77.2128	1.89985e-08	-0.0206464	12409.5	0.767788	0	1	12605.9	HNF4A
8843	cg08886154	0.699749	-77.1124	77.1124	1.94429e-08	-0.022527	8488.12	0.722276	0	1	8528.74	PAX4
5975	cg05985767	0.838499	-77.0765	77.0765	1.96043e-08	-0.0160359	7969.97	0.854535	0	1	7939.23	ANPEP
25345	cg25366404	0.763391	-77.0765	77.0765	1.96043e-08	-0.0198996	24957.5	0.78329	0	1	25196.7	MOCS1
21936	cg21964481	0.878327	-76.9675	76.9675	2.01026e-08	-0.0136413	17863.8	0.891968	0	1	17983.9	SLC34A3
6059	cg06094150	0.76917	-76.9575	76.9575	2.01486e-08	-0.0196158	15571.3	0.788786	0	1	15526.4	MT1B
19491	cg19504245	0.130267	-76.8836	76.8836	2.04947e-08	-0.0176921	17993.2	0.147959	0	1	17971.1	TNNT1
2258	cg02229946	0.732503	-76.8634	76.8634	2.05903e-08	-0.0212132	4491.53	0.753716	0	1	4539.6	IL1F7
13703	cg13758677	0.845937	-76.8634	76.8634	2.05903e-08	-0.0155828	13366.6	0.86152	0	1	13298.1	GAGE4
6255	cg06285340	0.832241	-76.7683	76.7683	2.1046e-08	-0.0163532	20076.5	0.848594	0	1	20028.8	CYP11A1
21078	cg21111471	0.74486	-76.5006	76.5006	2.23839e-08	-0.0206473	11779	0.765508	0	1	11706.5	FLRT1
16360	cg16280667	0.737753	-76.4267	76.4267	2.27684e-08	-0.0209387	14863.7	0.758691	0	1	15134.2	BLR1
1304	cg01295203	0.0812343	76.3663	76.3663	2.30869e-08	0.0138244	16856.4	0.0674099	0	1	16792.5	PRDM14
16798	cg16752583	0.792707	-76.277	76.277	2.35665e-08	-0.0183944	6929.5	0.811101	0	1	7009.1	TRPV6
16030	cg15954792	0.70423	-76.2204	76.2204	2.38761e-08	-0.0222287	8691.97	0.726459	0	1	8773.59	CNGA3
9445	cg09509673	0.769513	-76.2112	76.2112	2.39267e-08	-0.019502	9642.08	0.789016	0	1	9791.01	CCR10
12818	cg12869058	0.750255	-76.2112	76.2112	2.39267e-08	-0.0203707	7592.84	0.770626	0	1	7618.24	ABCA4
8303	cg08351331	0.717149	-76.202	76.202	2.39771e-08	-0.0217314	18359	0.73888	0	1	18659.2	LBP
16223	cg16155702	0.812259	-76.202	76.202	2.39771e-08	-0.0173749	29292.8	0.829634	0	1	29368.8	FGF21
16838	cg16791508	0.728799	-76.1336	76.1336	2.43577e-08	-0.0212594	4994.33	0.750059	0	1	5042.58	KRTHB3
6825	cg06825166	0.824926	-75.9842	75.9842	2.52105e-08	-0.0166717	20744.5	0.841598	0	1	20899.4	TMEM10
8580	cg08634024	0.801041	-75.9573	75.9573	2.53671e-08	-0.0179294	5794.77	0.81897	0	1	5879.34	OR2F1
19554	cg19560971	0.74054	-75.9496	75.9496	2.54124e-08	-0.0207479	14692.3	0.761288	0	1	14758.8	MFRP
17138	cg17105014	0.198002	75.9143	75.9143	2.56192e-08	0.0199946	6185.33	0.178008	0	1	6304.57	GYPC
7278	cg07297178	0.854238	-75.8335	75.8335	2.61006e-08	-0.0149924	12511.6	0.869231	0	1	12670.2	CEACAM7
26377	cg26394380	0.634887	-75.8012	75.8012	2.62954e-08	-0.0243427	17899.2	0.65923	0	1	18072.4	SFTPB
4270	cg04245402	0.818611	-75.7651	75.7651	2.65151e-08	-0.0169847	10510.2	0.835596	0	1	10779.1	C19orf21
13639	cg13696887	0.867233	-75.5992	75.5992	2.7547e-08	-0.0141949	9134.11	0.881428	0	1	9201.03	KRTHB2
17272	cg17240454	0.87112	-75.4407	75.4407	2.85714e-08	-0.0139452	16690.3	0.885065	0	1	16901.3	SPDEF
1581	cg01564343	0.788385	-75.4083	75.4083	2.87852e-08	-0.0184959	16345.5	0.806881	0	1	16544.3	TREML1
6729	cg06738602	0.123231	75.3907	75.3907	2.89018e-08	0.0161866	12952.6	0.107044	0	1	12993.5	PTGER2
1343	cg01333788	0.775181	-75.3248	75.3248	2.93442e-08	-0.0191187	11926.5	0.794299	0	1	12067.3	GJB5
13122	cg13216057	0.0922834	75.1388	75.1388	3.06279e-08	0.0143792	11956.4	0.0779043	0	1	11924.4	DKK3
6299	cg06325687	0.897668	-75.111	75.111	3.08251e-08	-0.012247	10238.3	0.909915	0	1	10465.5	OPN1MW
20454	cg20500126	0.808086	-75.0811	75.0811	3.10374e-08	-0.0174629	4995.01	0.825549	0	1	4996.6	ITGAE
15144	cg15149645	0.858185	-74.8992	74.8992	3.23651e-08	-0.0146705	6515.6	0.872856	0	1	6577.31	P8
3281	cg03264414	0.807794	-74.8992	74.8992	3.23655e-08	-0.0174576	13715.5	0.825252	0	1	13780.3	PAEP
15066	cg15062535	0.80686	-74.8622	74.8622	3.26423e-08	-0.0175008	7699.69	0.824361	0	1	7743.83	ZNF610
25213	cg25218351	0.772286	-74.6634	74.6634	3.41713e-08	-0.0191728	20300.3	0.791459	0	1	20296.3	TRIM54
22539	cg22575540	0.832296	-74.6539	74.6539	3.42461e-08	-0.0161219	11421.7	0.848418	0	1	11549	TRIM54
23727	cg23765993	0.722787	-74.5825	74.5825	3.4814e-08	-0.0212791	4341.27	0.744066	0	1	4376.1	SPINLW1
14535	cg14533138	0.785131	-74.4691	74.4691	3.57343e-08	-0.0185397	7797.1	0.80367	0	1	7715.89	KRTHA3B
17032	cg17001430	0.773477	-74.4102	74.4102	3.62223e-08	-0.0190842	9679.1	0.792562	0	1	9834.37	KIF25
13228	cg13300756	0.7932	-74.3889	74.3889	3.64008e-08	-0.0181345	20561	0.811335	0	1	20720.4	HAS1
11409	cg11474811	0.75315	-74.1149	74.1149	3.87716e-08	-0.0199626	12611.4	0.773113	0	1	12664.5	TRPM5
25074	cg25093045	0.697684	-74.1149	74.1149	3.87716e-08	-0.0221481	11316.3	0.719832	0	1	11349.4	FLJ46481
11740	cg11801374	0.805675	-73.9276	73.9276	4.04801e-08	-0.0174577	9554.2	0.823133	0	1	9606.47	C20orf160
14765	cg14761227	0.742546	-73.8664	73.8664	4.10546e-08	-0.020383	13294.5	0.762929	0	1	13257.7	CPA1
17691	cg17687282	0.783996	-73.7814	73.7814	4.1866e-08	-0.0185111	5960.03	0.802507	0	1	6126.11	A4GNT
23076	cg23110514	0.656463	-73.7814	73.7814	4.1866e-08	-0.0234265	3817.49	0.679889	0	1	3889.72	LCE3E
42	cg00037763	0.824965	-73.7327	73.7327	4.23383e-08	-0.0164229	9687.28	0.841388	0	1	9743.89	SETBP1
20862	cg20904010	0.775801	-73.705	73.705	4.26087e-08	-0.0188872	5698.76	0.794688	0	1	5803.8	SYN3
414	cg00406844	0.750547	-73.6319	73.6319	4.33322e-08	-0.0200087	12391	0.770556	0	1	12430.9	RFPL3
23456	cg23499956	0.791269	-73.6319	73.6319	4.33322e-08	-0.018138	30984.5	0.809407	0	1	31128.6	S100A16
1160	cg01144251	0.744471	-73.6174	73.6174	4.34772e-08	-0.020261	13337.4	0.764732	0	1	13327.4	KLK9
5910	cg05921324	0.793308	-73.6174	73.6174	4.34772e-08	-0.0180351	13932.4	0.811343	0	1	13826.3	APOA4
24384	cg24433189	0.702641	-73.5767	73.5767	4.38865e-08	-0.0218853	26484.2	0.724527	0	1	26636.3	SSTR5
10469	cg10545682	0.0728903	73.5271	73.5271	4.43907e-08	0.0130487	15821	0.0598416	0	1	15731.2	TUFT1
13977	cg14014225	0.84303	-73.3813	73.3813	4.59062e-08	-0.0153885	19600.9	0.858419	0	1	19843.7	SLC16A8
19114	cg19125606	0.801709	-73.3615	73.3615	4.61158e-08	-0.017585	9608.65	0.819295	0	1	9751.23	AGT
18525	cg18508525	0.797721	-73.1408	73.1408	4.85202e-08	-0.0177606	5690.93	0.815482	0	1	5769.44	CD36
2176	cg02157083	0.773788	-73.1082	73.1082	4.88859e-08	-0.0189006	11431.6	0.792689	0	1	11531.4	APOA5
17137	cg17103109	0.731331	-73.1082	73.1082	4.88859e-08	-0.020731	2550.02	0.752062	0	1	2654.92	HLA-DOB
9619	cg09674867	0.802617	-72.9943	72.9943	5.0185e-08	-0.0174974	16423.5	0.820115	0	1	16367.1	C11orf16
13482	cg13550608	0.85282	-72.8788	72.8788	5.15375e-08	-0.0147826	14883	0.867603	0	1	15065.7	SEMA3B
19979	cg19998328	0.827611	-72.8272	72.8272	5.21537e-08	-0.0161784	16954.2	0.843789	0	1	17093	LOC90580
23194	cg23219570	0.236829	72.7978	72.7978	5.25071e-08	0.0211701	18663.9	0.215659	0	1	18691.2	FGF23
26910	cg26946769	0.733952	-72.6539	72.6539	5.42768e-08	-0.0205626	4302.12	0.754515	0	1	4353.07	MAPK4
5011	cg04968426	0.874716	-72.6454	72.6454	5.43831e-08	-0.0134699	9999.41	0.888186	0	1	10131.6	PPP1R14D
7420	cg07446846	0.800309	-72.5611	72.5611	5.54489e-08	-0.0175615	16004.2	0.81787	0	1	16516.6	SLC6A8
25031	cg25053900	0.141356	72.4534	72.4534	5.68406e-08	0.016834	7876.29	0.124522	0	1	7986.11	ARX
21900	cg21930712	0.73115	-72.2981	72.2981	5.89104e-08	-0.0206253	6538.19	0.751775	0	1	6669.86	FLJ40235
24668	cg24697329	0.819465	-72.2981	72.2981	5.89104e-08	-0.0165528	11196.8	0.836018	0	1	11251.7	ARHGEF4
11231	cg11297236	0.693767	-72.111	72.111	6.15038e-08	-0.0219833	4973.69	0.71575	0	1	5012.12	PDILT
19972	cg19986872	0.0785255	72.1029	72.1029	6.16182e-08	0.0132703	22590.7	0.0652552	0	1	22249.8	ACSL6
17946	cg17918501	0.0861346	72.0971	72.0971	6.17005e-08	0.0137254	15145.4	0.0724092	0	1	15225.6	FNDC4
19089	cg19103609	0.666348	-71.9981	71.9981	6.31231e-08	-0.0228458	8088.28	0.689194	0	1	8225.35	PKN1
22048	cg22077553	0.797963	-71.9981	71.9981	6.31231e-08	-0.0176113	12709.4	0.815574	0	1	12714.1	MYOC
14818	cg14818279	0.829053	-71.9919	71.9919	6.32138e-08	-0.0160082	6799.85	0.845061	0	1	6845.78	SH3TC2
25416	cg25426302	0.799776	-71.963	71.963	6.36351e-08	-0.0175146	7359.42	0.817291	0	1	7424.69	PRRT1
15297	cg15303841	0.824512	-71.8716	71.8716	6.49895e-08	-0.0162368	8679.39	0.840749	0	1	8684.67	RFPL1
24709	cg24743310	0.883332	-71.8308	71.8308	6.56027e-08	-0.0128717	11743.6	0.896203	0	1	11697.6	FLJ31196
4101	cg04048259	0.108622	71.7738	71.7738	6.64699e-08	0.0149911	18443.9	0.0936307	0	1	18359.8	EDN3
2216	cg02192965	0.729745	-71.7623	71.7623	6.66448e-08	-0.020598	4317.35	0.750343	0	1	4372.71	SLC3A1
21542	cg21553596	0.0810904	71.7623	71.7623	6.66448e-08	0.0133899	15018.8	0.0677006	0	1	14954.1	FAM3B
26793	cg26822175	0.798373	-71.6492	71.6492	6.84044e-08	-0.0175443	9002.9	0.815918	0	1	9064.83	CRYBA4
597	cg00573606	0.850368	-71.5063	71.5063	7.06926e-08	-0.0147818	12985.7	0.86515	0	1	12962.7	COL6A3
5561	cg05556202	0.794563	-71.4971	71.4971	7.08414e-08	-0.0177124	8454.76	0.812276	0	1	8522.71	TM4SF19
19671	cg19692710	0.715899	-71.4271	71.4271	7.19926e-08	-0.0210819	4458.84	0.736981	0	1	4506.44	DNAJB13
19240	cg19240938	0.853209	-71.4155	71.4155	7.21855e-08	-0.0146098	8294.34	0.867819	0	1	8212.66	SLC22A18
2819	cg02813121	0.829567	-71.378	71.378	7.28112e-08	-0.0159078	11703.9	0.845475	0	1	11833.8	S100A12
6911	cg06917325	0.743809	-71.378	71.378	7.28112e-08	-0.0199738	10119.1	0.763783	0	1	10289	SLC22A8
26040	cg26062856	0.737473	-71.378	71.378	7.28112e-08	-0.0202349	23139.6	0.757708	0	1	23351.7	ATP10A
4566	cg04520391	0.778259	-71.2288	71.2288	7.53567e-08	-0.0184488	6162.47	0.796708	0	1	6280.36	PRB2
4862	cg04802221	0.767504	-71.0456	71.0456	7.86026e-08	-0.0189154	7846.11	0.78642	0	1	7841	LOC283849
23656	cg23696712	0.84131	-71.0357	71.0357	7.87833e-08	-0.0152361	23679.1	0.856546	0	1	23712.1	KRT6L
23383	cg23413307	0.763349	-70.7575	70.7575	8.39945e-08	-0.0190643	7625.48	0.782413	0	1	7765.86	LCE1F
19248	cg19250907	0.802367	-70.736	70.736	8.44108e-08	-0.0172394	5238.7	0.819606	0	1	5362.76	CPA6
8220	cg08268099	0.760027	-70.7194	70.7194	8.47341e-08	-0.0192024	9424.39	0.779229	0	1	9508.42	OLFM1
21120	cg21153758	0.0749445	70.6749	70.6749	8.56066e-08	0.0129217	27642.6	0.0620228	0	1	27154.4	ITGA1
19298	cg19305227	0.762619	-70.6322	70.6322	8.64532e-08	-0.0190769	6942.78	0.781696	0	1	6997.48	SLC28A2
2892	cg02899723	0.92774	-70.5765	70.5765	8.75687e-08	-0.0099265	17694.5	0.937667	0	1	17765.7	DDX4
2882	cg02882813	0.792264	-70.4873	70.4873	8.93857e-08	-0.0176995	9531.92	0.809963	0	1	9586.97	CST5
17525	cg17501569	0.835801	-70.4873	70.4873	8.93857e-08	-0.0154784	13806.5	0.85128	0	1	13832.7	MSLN
2853	cg02854090	0.82753	-70.479	70.479	8.95565e-08	-0.0159188	4991.26	0.843449	0	1	5013.15	HIST1H2AA
5535	cg05517711	0.6996	-70.4741	70.4741	8.96586e-08	-0.0215219	16437.1	0.721122	0	1	16580.1	ST6GALNAC6
12616	cg12682367	0.664967	-70.4741	70.4741	8.96586e-08	-0.0226352	12751.4	0.687602	0	1	12862.6	FLJ46358
25594	cg25596297	0.11449	70.4197	70.4197	9.07885e-08	0.0151706	5841.98	0.0993191	0	1	5880.93	FLJ32447
8314	cg08365982	0.86687	-70.3422	70.3422	9.24238e-08	-0.0137152	12878.2	0.880586	0	1	12857	CAV3
20409	cg20449692	0.12178	70.1832	70.1832	9.58687e-08	0.0155423	25217.3	0.106238	0	1	24953.2	CLDN11
21876	cg21907579	0.11303	70.1533	70.1533	9.65315e-08	0.0150637	8020.26	0.0979667	0	1	8116.11	TBX5
21507	cg21518947	0.703766	-70.1499	70.1499	9.66075e-08	-0.0213252	23497.3	0.725092	0	1	23268	CABP4
24313	cg24357161	0.687532	-70.1499	70.1499	9.66075e-08	-0.0218784	24311.7	0.70941	0	1	24720.3	RCV1
47	cg00042156	0.765971	-69.986	69.986	1.00322e-07	-0.0188398	13543.8	0.784811	0	1	13571.2	MGC16291
6356	cg06384491	0.743948	-69.9335	69.9335	1.01543e-07	-0.0197673	7459.19	0.763716	0	1	7627.07	SPIN2
20476	cg20526800	0.72802	-69.8597	69.8597	1.03283e-07	-0.0203885	22008.8	0.748409	0	1	22043.3	C20orf128
25217	cg25221254	0.817576	-69.8597	69.8597	1.03283e-07	-0.0163656	13073.4	0.833941	0	1	13119.2	ASAH3
11703	cg11761535	0.775317	-69.8124	69.8124	1.04413e-07	-0.0183981	6699.59	0.793716	0	1	6767.24	TM4SF18
18714	cg18705776	0.739806	-69.7197	69.7197	1.06667e-07	-0.0199044	10432.6	0.759711	0	1	10467.1	CALML3
2009	cg01988129	0.13852	69.6574	69.6574	1.08208e-07	0.0163587	9485.97	0.122162	0	1	9483.39	ADHFE1
3306	cg03287877	0.73698	-69.6271	69.6271	1.08965e-07	-0.0200037	3598.06	0.756983	0	1	3653.48	DCAKD
21765	cg21770617	0.808727	-69.507	69.507	1.1202e-07	-0.0167713	22254.9	0.825499	0	1	22386.3	FAM3D
18506	cg18493182	0.824697	-69.2648	69.2648	1.18446e-07	-0.0159326	24863	0.84063	0	1	24790.4	LYPD2
1621	cg01602596	0.770242	-69.0975	69.0975	1.23097e-07	-0.0185386	16737.5	0.78878	0	1	16781	KRT14
6203	cg06238491	0.096476	68.9692	68.9692	1.26788e-07	0.0140221	12703.5	0.0824539	0	1	12865.7	LAIR1
16350	cg16272420	0.755754	-68.9692	68.9692	1.26788e-07	-0.0191493	11633	0.774903	0	1	11595.2	PNLIPRP2
6461	cg06489008	0.764704	-68.8701	68.8701	1.29715e-07	-0.0187499	4300.21	0.783454	0	1	4324.1	CST11
8845	cg08887581	0.812337	-68.8701	68.8701	1.29715e-07	-0.0165197	15268.1	0.828857	0	1	15561.4	C1orf64
13522	cg13587552	0.846163	-68.8701	68.8701	1.29715e-07	-0.0147444	23265.1	0.860907	0	1	23174.5	SCNN1D
6413	cg06437862	0.770536	-68.6074	68.6074	1.37802e-07	-0.0184631	4988.85	0.788999	0	1	4995.84	TUBA2
14188	cg14209518	0.771964	-68.5471	68.5471	1.39731e-07	-0.0183918	7702.45	0.790356	0	1	7789.76	NNMT
1787	cg01767116	0.728411	-68.4498	68.4498	1.42896e-07	-0.0201786	10234.6	0.748589	0	1	10134.6	FBXL22
8151	cg08191915	0.765315	-68.4498	68.4498	1.42896e-07	-0.0186692	10737.7	0.783984	0	1	10802.4	PANX3
9291	cg09354331	0.827288	-68.4498	68.4498	1.42896e-07	-0.015709	11027.3	0.842997	0	1	10996.1	RAI17
19098	cg19109431	0.760645	-68.4149	68.4149	1.44048e-07	-0.0188653	3744.67	0.779511	0	1	3773.21	NFKBIE
367	cg00350478	0.695236	-68.3751	68.3751	1.45376e-07	-0.0213553	20132.6	0.716592	0	1	20360.5	FRMD1
13841	cg13885201	0.0920906	68.3543	68.3543	1.46073e-07	0.0137109	11392.7	0.0783797	0	1	11416.2	ZNF23
16327	cg16254309	0.119165	68.3388	68.3388	1.46596e-07	0.0152032	12311.6	0.103962	0	1	12445.9	CNTNAP2
8482	cg08539991	0.694704	-68.2882	68.2882	1.48315e-07	-0.0213575	19987.8	0.716062	0	1	20323.7	ZBTB32
8636	cg08693325	0.679696	-68.0834	68.0834	1.55475e-07	-0.0218141	4026.84	0.70151	0	1	4132.64	LUZP4
8556	cg08612871	0.772415	-68.0059	68.0059	1.58273e-07	-0.0182987	7251.73	0.790713	0	1	7270.1	GJB5
21618	cg21624282	0.868408	-68.0059	68.0059	1.58273e-07	-0.0134059	10317.9	0.881814	0	1	10529.2	LOC122258
6939	cg06948937	0.758576	-67.9887	67.9887	1.58903e-07	-0.0188941	7509.23	0.77747	0	1	7503.3	PCTK3
16188	cg16112945	0.705889	-67.9837	67.9837	1.59087e-07	-0.0209286	8715.84	0.726817	0	1	8711.35	ADAMTS13
17860	cg17833578	0.656586	-67.9796	67.9796	1.59236e-07	-0.0224761	6476.4	0.679062	0	1	6528.44	LRRC21
711	cg00684178	0.762284	-67.9485	67.9485	1.6038e-07	-0.0187278	9731.83	0.781011	0	1	10014.5	NEU4
14295	cg14312526	0.1074	67.874	67.874	1.63153e-07	0.0145165	31341.5	0.0928836	0	1	30768.9	FOXL2
788	cg00757070	0.694936	-67.8437	67.8437	1.64296e-07	-0.0212784	14629.8	0.716214	0	1	14786.1	UPK2
23544	cg23595927	0.79939	-67.8437	67.8437	1.64296e-07	-0.0170274	7273.65	0.816417	0	1	7293.89	MYL5
1876	cg01853981	0.883087	-67.829	67.829	1.64853e-07	-0.012526	22061.1	0.895613	0	1	22181.5	KRT6IRS
13363	cg13434852	0.815328	-67.8078	67.8078	1.65661e-07	-0.0162394	11316.9	0.831568	0	1	11394.7	DOCK1
22144	cg22181664	0.707523	-67.7816	67.7816	1.66663e-07	-0.0208345	5449.68	0.728358	0	1	5518.61	CLCA1
13828	cg13877895	0.828149	-67.6965	67.6965	1.6996e-07	-0.0155711	7362.15	0.84372	0	1	7380.09	GKN1
24223	cg24278076	0.80659	-67.6965	67.6965	1.6996e-07	-0.0166582	4361.93	0.823248	0	1	4435.57	PLS1
15204	cg15210427	0.713482	-67.6278	67.6278	1.72671e-07	-0.0205992	22121.4	0.734081	0	1	22371	CST9L
21559	cg21572897	0.69648	-67.6197	67.6197	1.72993e-07	-0.0211867	5530.04	0.717666	0	1	5587.94	CD80
12084	cg12127282	0.25794	67.5509	67.5509	1.75756e-07	0.0211314	12507.3	0.236809	0	1	12528.7	HOXD4
6636	cg06639544	0.743519	-67.4498	67.4498	1.79894e-07	-0.0194323	7130.4	0.762951	0	1	7229.21	OR7A5
27539	cg27622610	0.758619	-67.4131	67.4131	1.81422e-07	-0.0188059	6792.73	0.777425	0	1	6789.75	OR1G1
7030	cg07039362	0.777138	-67.3985	67.3985	1.82034e-07	-0.0179985	11396.3	0.795136	0	1	11507	CES7
16861	cg16812893	0.688932	-67.329	67.329	1.84969e-07	-0.0213899	10008.2	0.710322	0	1	10163	KRTAP15-1
27346	cg27412093	0.810456	-67.3134	67.3134	1.85634e-07	-0.0164205	8763.56	0.826876	0	1	8786.28	CAPN9
12474	cg12554573	0.683931	-67.2405	67.2405	1.88777e-07	-0.0215352	15499.9	0.705466	0	1	15638.1	PARP3
12671	cg12728629	0.898296	-67.1859	67.1859	1.91164e-07	-0.0115495	18276.2	0.909845	0	1	18265.9	MAGEA2
2772	cg02765820	0.746238	-67.1728	67.1728	1.91743e-07	-0.0192811	6072.18	0.765519	0	1	6174.2	C3orf22
23253	cg23274244	0.79317	-67.1595	67.1595	1.92329e-07	-0.0172315	8326.65	0.810402	0	1	8391.41	TNFRSF13B
25636	cg25651984	0.91364	-67.0926	67.0926	1.95318e-07	-0.0105852	28244.4	0.924225	0	1	28271.2	MAGEC1
27175	cg27235662	0.713759	-67.0926	67.0926	1.95318e-07	-0.0205038	9040.17	0.734263	0	1	9179.28	CLDN16
18230	cg18223379	0.808763	-67.0401	67.0401	1.97691e-07	-0.0164686	9728.03	0.825232	0	1	9908.29	BPIL3
10743	cg10848367	0.691147	-67.0271	67.0271	1.98284e-07	-0.0212655	8258.57	0.712412	0	1	8346.77	SCGB1D2
762	cg00729708	0.601061	67.015	67.015	1.9884e-07	0.0240543	10560.5	0.577006	0	1	10127.4	LASS3
5648	cg05657520	0.812865	-67.015	67.015	1.9884e-07	-0.0162616	6366.46	0.829126	0	1	6449.55	OPTC
19553	cg19560758	0.119719	66.948	66.948	2.01929e-07	0.0150685	26641.6	0.10465	0	1	27030	ERRFI1
24455	cg24490338	0.832471	-66.948	66.948	2.01929e-07	-0.0152564	7519.54	0.847727	0	1	7595.54	TPM3
10903	cg10990993	0.710609	-66.9196	66.9196	2.03254e-07	-0.0205833	4766.69	0.731192	0	1	4802.12	MLH1
27490	cg27557796	0.830978	-66.9196	66.9196	2.03254e-07	-0.015329	16957.6	0.846306	0	1	16748.2	LY6G6C
11012	cg11091262	0.722528	-66.8776	66.8776	2.05231e-07	-0.0201463	6178.28	0.742674	0	1	6279.67	GALNTL5
4336	cg04311964	0.832082	-66.8723	66.8723	2.05479e-07	-0.0152649	23860.5	0.847347	0	1	23627.4	LYPD2
13469	cg13531460	0.736047	-66.8564	66.8564	2.06233e-07	-0.0196291	20167.4	0.755676	0	1	20535	GPR55
8973	cg09027725	0.785937	-66.8165	66.8165	2.08136e-07	-0.0175142	5753.06	0.803451	0	1	5699.12	COX4I2
14903	cg14897096	0.792819	-66.8151	66.8151	2.08206e-07	-0.017195	6109.99	0.810014	0	1	6150.04	PC
9104	cg09163021	0.777621	-66.7663	66.7663	2.10559e-07	-0.017881	26954.9	0.795503	0	1	26995.6	RAPSN
18996	cg19000186	0.719781	-66.7663	66.7663	2.10559e-07	-0.0202256	9607.6	0.740007	0	1	9706.12	CNGA1
17855	cg17829936	0.784623	-66.6725	66.6725	2.15156e-07	-0.017554	11930.4	0.802177	0	1	11991.6	TAAR5
2745	cg02738086	0.735707	-66.5878	66.5878	2.19393e-07	-0.0196019	10824.6	0.755309	0	1	10951.4	POLR3H
16554	cg16483466	0.794535	-66.5858	66.5858	2.19494e-07	-0.017085	17575.7	0.81162	0	1	17390.6	C20orf186
6785	cg06799664	0.729348	-66.5305	66.5305	2.22308e-07	-0.0198355	24618	0.749184	0	1	24721.5	DNAHL1
12385	cg12456510	0.842396	-66.4902	66.4902	2.24378e-07	-0.0146756	12128.9	0.857071	0	1	12329.2	TFF2
19662	cg19685066	0.814609	-66.4902	66.4902	2.24378e-07	-0.016105	12304	0.830714	0	1	12355.6	ACTL8
20740	cg20789824	0.608357	-66.4669	66.4669	2.25583e-07	-0.0233653	15897.8	0.631723	0	1	15631.8	OLFML2A
2762	cg02756698	0.769797	-66.4384	66.4384	2.27072e-07	-0.0181766	5074.36	0.787974	0	1	5040.84	KRT12
17483	cg17463527	0.7684	-66.4384	66.4384	2.27072e-07	-0.018236	10103.6	0.786636	0	1	10236.8	SGK2
22218	cg22241124	0.690137	-66.4384	66.4384	2.27072e-07	-0.0211894	7649.81	0.711326	0	1	7740.42	CNGA3
24477	cg24506604	0.690808	-66.4384	66.4384	2.27072e-07	-0.0211681	8731.03	0.711976	0	1	8706.74	LOC144501
13168	cg13255629	0.808543	-66.3596	66.3596	2.31228e-07	-0.0163835	8805.73	0.824927	0	1	8853.56	MEPE
23946	cg23989635	0.111418	66.3094	66.3094	2.33915e-07	0.014549	21326.3	0.0968694	0	1	21105.4	CDH1
26442	cg26473272	0.890167	-66.3094	66.3094	2.33915e-07	-0.0119536	20667.8	0.902121	0	1	20576.3	SYT8
26408	cg26424956	0.795062	-66.2257	66.2257	2.38468e-07	-0.0170095	21390	0.812071	0	1	21433.3	GRM4
479	cg00466436	0.676798	-66.2081	66.2081	2.39435e-07	-0.0215671	6251.07	0.698365	0	1	6419.99	DEFB126
12802	cg12855851	0.834865	-66.2081	66.2081	2.39435e-07	-0.0150368	16233.7	0.849902	0	1	16283.1	PGC
268	cg00240880	0.838126	-66.153	66.153	2.42495e-07	-0.0148593	11439.1	0.852985	0	1	11565.3	WISP2
15947	cg15873301	0.0887553	66.153	66.153	2.42495e-07	0.0132837	11764.5	0.0754716	0	1	11884.1	SYN2
20621	cg20664247	0.663365	-66.1121	66.1121	2.44787e-07	-0.0219444	25911.1	0.68531	0	1	26140.1	PEX10
21693	cg21686987	0.794933	-66.0609	66.0609	2.4769e-07	-0.0169918	18750.1	0.811925	0	1	18691.2	CTRB1
21133	cg21168884	0.792258	-66.0289	66.0289	2.49524e-07	-0.0171117	6602.22	0.80937	0	1	6623.78	C6orf122
24416	cg24457403	0.713261	-65.9864	65.9864	2.51978e-07	-0.0203319	20256.7	0.733593	0	1	20371.2	KRT16
5617	cg05615150	0.596076	-65.8484	65.8484	2.60114e-07	-0.0234901	5116.2	0.619566	0	1	5136.03	ARPP-21
11127	cg11201288	0.715137	-65.8484	65.8484	2.60114e-07	-0.0202453	3217.27	0.735382	0	1	3243.41	SFRS11
8882	cg08929103	0.705722	-65.8435	65.8435	2.60402e-07	-0.0205722	11280.8	0.726294	0	1	11419.2	CRHR1
12547	cg12610070	0.246065	65.6321	65.6321	2.73391e-07	0.0204061	18384.5	0.225659	0	1	18415.6	TSPAN15
22385	cg22415472	0.751	-65.5104	65.5104	2.81164e-07	-0.0188355	9044.02	0.769836	0	1	9123.16	SLC5A7
14148	cg14173523	0.760032	-65.4717	65.4717	2.8368e-07	-0.0184588	12697.3	0.778491	0	1	12820.7	FUT5
21294	cg21307628	0.791375	-65.4674	65.4674	2.83964e-07	-0.0170833	6908.45	0.808459	0	1	7034.53	URB
24656	cg24691461	0.695063	-65.3819	65.3819	2.8961e-07	-0.0208616	14660	0.715924	0	1	14758	C20orf160
12699	cg12754854	0.727526	-65.24	65.24	2.99226e-07	-0.0197083	3283.61	0.747234	0	1	3270.32	PHYHD1
8169	cg08214029	0.678689	-65.1929	65.1929	3.02491e-07	-0.0213495	11472.9	0.700039	0	1	11558.1	CCL18
14041	cg14076161	0.707907	-65.1724	65.1724	3.03921e-07	-0.0203992	12314.9	0.728307	0	1	12347.2	PRB4
5862	cg05873268	0.78344	-65.1368	65.1368	3.06419e-07	-0.0174019	15309.6	0.800842	0	1	15397.2	TPSAB1
7714	cg07747299	0.224251	-65.1019	65.1019	3.08892e-07	-0.0202712	10621.4	0.244522	0	1	10758	C21orf56
18178	cg18172186	0.810514	-65.1019	65.1019	3.08892e-07	-0.0161343	6723.31	0.826648	0	1	6768.4	KIAA1913
505	cg00491404	0.742156	-64.9123	64.9123	3.22678e-07	-0.019102	15691.3	0.761258	0	1	15900.8	EPS8L3
24898	cg24926042	0.721343	-64.9123	64.9123	3.22678e-07	-0.0198854	27460.9	0.741228	0	1	27628.3	KRTHB2
13428	cg13493001	0.827269	-64.8947	64.8947	3.23989e-07	-0.0152804	16750.5	0.842549	0	1	16829	LCN12
13023	cg13105904	0.21251	-64.8325	64.8325	3.28661e-07	-0.019796	15528	0.232306	0	1	15814.5	KIAA0323
5256	cg05241571	0.879112	-64.8197	64.8197	3.29629e-07	-0.0124667	18082.1	0.891579	0	1	18041.2	UNQ467
17099	cg17067005	0.753787	-64.7328	64.7328	3.36295e-07	-0.0186125	4353.05	0.7724	0	1	4347.83	IL10
6607	cg06617418	0.71722	-64.7088	64.7088	3.38159e-07	-0.020001	4585.33	0.737221	0	1	4650.25	RGAG1
25645	cg25661884	0.508445	-64.5788	64.5788	3.48437e-07	-0.0243596	6867.31	0.532805	0	1	6910.65	RDH8
13624	cg13681935	0.836267	-64.5768	64.5768	3.48596e-07	-0.0147837	10063.8	0.851051	0	1	10057.3	ASIP
10244	cg10318258	0.777764	-64.546	64.546	3.51072e-07	-0.0175746	6204.68	0.795339	0	1	6249.57	RIPK3
754	cg00725777	0.769403	-64.3799	64.3799	3.64767e-07	-0.0179156	4080.11	0.787319	0	1	4154.97	NGFRAP1
18831	cg18839416	0.697174	-64.3515	64.3515	3.67152e-07	-0.0206323	9676.87	0.717806	0	1	9764.79	C1orf158
3220	cg03190825	0.624318	-64.1918	64.1918	3.80908e-07	-0.0226225	17854.6	0.646941	0	1	17927.4	CYP4F11
3204	cg03167883	0.763941	-64.1247	64.1247	3.86841e-07	-0.0181131	5820.5	0.782054	0	1	5859.05	FLJ46365
18228	cg18221897	0.842281	-64.093	64.093	3.89676e-07	-0.01442	30863.6	0.856701	0	1	30801	KIR2DL1
5217	cg05190718	0.76136	-63.9674	63.9674	4.01109e-07	-0.0181997	7869.04	0.77956	0	1	8019.47	CASQ2
8273	cg08321330	0.789342	-63.9407	63.9407	4.03578e-07	-0.0169844	15534.2	0.806326	0	1	15696.5	TPSB2
1700	cg01671881	0.758336	-63.8878	63.8878	4.08525e-07	-0.0183126	7063.27	0.776648	0	1	7178.53	C20orf71
9894	cg09971811	0.397214	63.8021	63.8021	4.16665e-07	0.0237328	10200.1	0.373481	0	1	10247.1	CST7
10481	cg10560038	0.92001	-63.7828	63.7828	4.18522e-07	-0.0099256	12948.9	0.929936	0	1	13293	CMTM5
1380	cg01369413	0.736957	-63.7109	63.7109	4.25511e-07	-0.0191317	7000.41	0.756088	0	1	7017.76	UBQLN3
21569	cg21578906	0.852673	-63.672	63.672	4.29335e-07	-0.0138245	13021.8	0.866498	0	1	12944.2	SLC5A4
25916	cg25942450	0.106407	63.672	63.672	4.29335e-07	0.0140023	14481	0.0924049	0	1	14724.3	TLX3
23941	cg23984130	0.760689	-63.641	63.641	4.32417e-07	-0.0181802	5601.03	0.778869	0	1	5787.32
25654	cg25668626	0.749198	-63.3975	63.3975	4.57353e-07	-0.0186136	3148.5	0.767812	0	1	3202.22	OAS1
19228	cg19233472	0.806543	-63.3679	63.3679	4.60478e-07	-0.0161184	5210.36	0.822661	0	1	5271.09	FOXI1
20645	cg20691580	0.79623	-63.3463	63.3463	4.62772e-07	-0.0165957	20294.5	0.812825	0	1	20338.4	APOC3
5912	cg05921699	0.739656	-63.3274	63.3274	4.64791e-07	-0.018973	6035.62	0.758629	0	1	6047.23	CD79A
21005	cg21044104	0.765825	-63.3122	63.3122	4.66419e-07	-0.0179229	8090.53	0.783748	0	1	8102.03	LYZL4
16258	cg16192029	0.913973	-63.2251	63.2251	4.7587e-07	-0.0102575	11492	0.924231	0	1	11613.5	ANKRD7
11936	cg11981599	0.147551	63.1395	63.1395	4.85343e-07	0.0160109	20866.3	0.13154	0	1	20761.4	GATA4
3030	cg03014957	0.634487	-63.0726	63.0726	4.92878e-07	-0.0221962	5108	0.656683	0	1	5147.94	DEFB118
24296	cg24346637	0.800152	-63.0245	63.0245	4.98366e-07	-0.0163743	15633	0.816526	0	1	15483.1	UBL4B
616	cg00596686	0.715281	-62.9283	62.9283	5.09534e-07	-0.0198054	3885.64	0.735087	0	1	3932.12	STS
20477	cg20530056	0.733058	-62.7285	62.7285	5.33513e-07	-0.0191384	11489.1	0.752197	0	1	11634.7	IKBKE
20943	cg20985014	0.787116	-62.6452	62.6452	5.43847e-07	-0.016921	11477.9	0.804037	0	1	11525.7	WISP3
8078	cg08109646	0.734346	-62.588	62.588	5.51059e-07	-0.0190703	7360.4	0.753417	0	1	7366.31	ZNF683
18550	cg18538812	0.706774	-62.5548	62.5548	5.55291e-07	-0.0200409	8956.27	0.726815	0	1	8875.88	GIF
19131	cg19139729	0.692344	-62.5548	62.5548	5.55291e-07	-0.0205115	8252.15	0.712856	0	1	8435.28	SULT2A1
9864	cg09936839	0.71708	-62.3939	62.3939	5.7625e-07	-0.0196655	8606.87	0.736745	0	1	8795.34	SIRT6
19299	cg19306866	0.759258	-62.3519	62.3519	5.81854e-07	-0.0180662	5052.6	0.777324	0	1	5160.53	KRTAP6-2
23178	cg23207527	0.774351	-62.2116	62.2116	6.00947e-07	-0.0174208	4207.37	0.791772	0	1	4209.85	RBM24
2456	cg02440177	0.0679278	62.1801	62.1801	6.0533e-07	0.0117299	22271	0.0561979	0	1	22097.1	ZNF702
9200	cg09260089	0.0907206	62.1245	62.1245	6.13126e-07	0.013003	15922.5	0.0777177	0	1	15945.7	NKX6-2
19365	cg19372178	0.654727	-61.9583	61.9583	6.37045e-07	-0.0215089	10141.4	0.676236	0	1	10085.4	TMEM16G
10496	cg10575735	0.779027	-61.9442	61.9442	6.39122e-07	-0.0171854	5559.08	0.796212	0	1	5613.63	SSX4
15889	cg15820955	0.776613	-61.8917	61.8917	6.46886e-07	-0.017282	13822.4	0.793894	0	1	13850.9	HDAC7A
12827	cg12878228	0.745545	-61.8368	61.8368	6.55126e-07	-0.0185385	14310.6	0.764084	0	1	14267.6	PRSS1
27354	cg27418851	0.711227	-61.8094	61.8094	6.59262e-07	-0.0197793	10514	0.731006	0	1	10536.2	MBL2
18533	cg18515587	0.733263	-61.7612	61.7612	6.66618e-07	-0.0189907	4214.06	0.752254	0	1	4244.3	SELENBP1
9205	cg09261262	0.791319	-61.7545	61.7545	6.6765e-07	-0.0166194	11187.2	0.807939	0	1	11329.9	OPN4
21578	cg21591452	0.928843	-61.6597	61.6597	6.82392e-07	-0.00922132	22277.4	0.938064	0	1	22387	TMEM105
16818	cg16773028	0.744939	-61.5833	61.5833	6.94498e-07	-0.018525	6749.97	0.763464	0	1	6780.97	KCNA2
17679	cg17676574	0.753959	-61.5796	61.5796	6.95085e-07	-0.0181713	21081.2	0.772131	0	1	21065.7	UROC1
11938	cg11983245	0.724616	-61.5575	61.5575	6.98626e-07	-0.019273	18953.4	0.743889	0	1	19131.8	KRT15
24144	cg24199834	0.122594	61.2984	61.2984	7.41583e-07	0.0145844	8813.05	0.108009	0	1	8802.04	POU4F2
15475	cg15475323	0.827909	-61.2596	61.2596	7.48232e-07	-0.0148409	7427.43	0.84275	0	1	7479.02	FLJ36070
13195	cg13274713	0.0764712	61.1736	61.1736	7.63198e-07	0.0121247	20745.5	0.0643465	0	1	21008.4	TBX2
4069	cg04014889	0.779972	-61.1497	61.1497	7.67409e-07	-0.0170403	6556.12	0.797012	0	1	6603.45	MAGEL2
7115	cg07115820	0.637206	-61.145	61.145	7.68249e-07	-0.0218091	14953.6	0.659015	0	1	15167.9	EPX
12272	cg12348970	0.787451	-61.0432	61.0432	7.8647e-07	-0.0167012	4039.42	0.804152	0	1	4104.48	SLC24A2
15785	cg15750705	0.887694	-61.0111	61.0111	7.92306e-07	-0.0116336	11609.4	0.899328	0	1	11581.5	GJB4
20267	cg20305726	0.710335	-60.9585	60.9585	8.01957e-07	-0.0196796	7288.21	0.730015	0	1	7433.36	DEFB126
3376	cg03364781	0.704664	-60.8773	60.8773	8.17086e-07	-0.0198559	5174.26	0.72452	0	1	5264.58	ALPK1
12065	cg12111714	0.2814	60.8308	60.8308	8.2589e-07	0.0207815	4538.69	0.260619	0	1	4543.29	ATP8A2
1821	cg01796228	0.687775	-60.8099	60.8099	8.29862e-07	-0.0203796	4269.36	0.708155	0	1	4308.49	LIFR
19935	cg19949550	0.781867	-60.7608	60.7608	8.39296e-07	-0.0169062	8427.72	0.798773	0	1	8426.22	ASB2
19286	cg19290962	0.695779	-60.7172	60.7172	8.47768e-07	-0.0201157	9315.85	0.715895	0	1	9411.56	TMC2
10072	cg10157098	0.483765	60.7161	60.7161	8.47981e-07	0.0237705	20899.1	0.459995	0	1	21218.8	NYD-SP18
8442	cg08495878	0.836558	-60.7151	60.7151	8.4818e-07	-0.0143458	14299.6	0.850903	0	1	14173.7	SERPINA4
7478	cg07499072	0.0938421	60.6291	60.6291	8.65153e-07	0.0130209	20546.7	0.0808212	0	1	20399.4	FST
14995	cg14992108	0.789532	-60.6092	60.6092	8.69121e-07	-0.0165502	6268.77	0.806083	0	1	6282.81	SNTB1
4410	cg04384208	0.716501	-60.6079	60.6079	8.69387e-07	-0.0194122	10972.1	0.735913	0	1	11284.5	FCGR3A
16576	cg16507522	0.751219	-60.5967	60.5967	8.71628e-07	-0.0181371	5851.41	0.769356	0	1	5923.16	SERPINA3
15358	cg15361750	0.339782	60.4911	60.4911	8.93071e-07	0.022164	4023.4	0.317618	0	1	4091.71	GPR77
5494	cg05484458	0.716335	-60.4836	60.4836	8.94625e-07	-0.019398	10700.5	0.735733	0	1	10678.9	GNB3
3710	cg03699566	0.758829	-60.4471	60.4471	9.0218e-07	-0.0178155	7497.47	0.776644	0	1	7467.8	FOLR1
17984	cg17964955	0.727448	-60.4402	60.4402	9.03608e-07	-0.0190001	7066.12	0.746448	0	1	7011.59	RBP3
22458	cg22478614	0.672403	-60.4402	60.4402	9.03608e-07	-0.0207657	22734	0.693169	0	1	22729.8	DEFB4
18446	cg18434152	0.845387	-60.3704	60.3704	9.18237e-07	-0.0138566	5852.64	0.859244	0	1	5919.39	PROK1
10335	cg10414946	0.755682	-60.3696	60.3696	9.18415e-07	-0.017927	5500.44	0.773609	0	1	5633.11	MS4A2
24093	cg24134767	0.734831	-60.2928	60.2928	9.34798e-07	-0.0187104	10453.5	0.753542	0	1	10562.4	HTR3A
3635	cg03609102	0.602323	-60.289	60.289	9.35621e-07	-0.0223921	27899.8	0.624715	0	1	27975.8	MUC5B
15221	cg15228639	0.747569	-60.289	60.289	9.35621e-07	-0.0182298	10379.2	0.765799	0	1	10467.6	PLA2G4E
3532	cg03520136	0.753778	-60.1747	60.1747	9.60579e-07	-0.0179738	4454.57	0.771752	0	1	4500.25	UPP2
10507	cg10585962	0.742385	-59.9147	59.9147	1.01983e-06	-0.0183771	19654.6	0.760762	0	1	19718	MOGAT2
4134	cg04086012	0.699664	-59.9137	59.9137	1.02008e-06	-0.0198603	12082.4	0.719525	0	1	12202.6	FLJ36180
24994	cg25020850	0.670132	-59.8497	59.8497	1.03522e-06	-0.0207336	12361.3	0.690866	0	1	12502.5	RGS8
24762	cg24794992	0.743977	-59.7454	59.7454	1.06038e-06	-0.0182915	6119.95	0.762268	0	1	6313.38	OTOA
26848	cg26870566	0.744827	-59.7454	59.7454	1.06038e-06	-0.0182599	6863.65	0.763087	0	1	6883.59	KIRREL
24363	cg24411312	0.827461	-59.6833	59.6833	1.07564e-06	-0.014676	14401.8	0.842137	0	1	14493.2	ST14
21170	cg21207436	0.722263	-59.6535	59.6535	1.08306e-06	-0.0190654	18568.7	0.741329	0	1	18507.3	C14orf115
25484	cg25484904	0.214014	59.6255	59.6255	1.09005e-06	0.0183571	13528.7	0.195657	0	1	13725.5	FLJ21511
952	cg00918005	0.812851	-59.6097	59.6097	1.09404e-06	-0.0153626	10540.3	0.828214	0	1	10574.9	REG3G
19695	cg19717150	0.695482	-59.6026	59.6026	1.09583e-06	-0.0199404	7314.83	0.715423	0	1	7386.92	HNF4A
2093	cg02064402	0.755833	-59.5228	59.5228	1.11615e-06	-0.0178014	13887.5	0.773634	0	1	13935.9	SLC6A18
15465	cg15464148	0.730368	-59.3987	59.3987	1.14849e-06	-0.0187402	14143.9	0.749108	0	1	14213.4	GPR92
1088	cg01074640	0.861146	-59.3464	59.3464	1.1624e-06	-0.0129281	14276.9	0.874074	0	1	14503.8	IFNA17
25975	cg25995460	0.823059	-59.2852	59.2852	1.17891e-06	-0.0148413	7404.38	0.8379	0	1	7484.44	C1QA
21870	cg21902327	0.775159	-59.2462	59.2462	1.18955e-06	-0.0169821	18042.8	0.792141	0	1	18057.7	FGF6
20678	cg20725021	0.748057	-59.2277	59.2277	1.19462e-06	-0.0180601	17197.3	0.766117	0	1	17170.9	MASP1
2443	cg02423618	0.641369	-59.1389	59.1389	1.2193e-06	-0.0213572	25225.8	0.662726	0	1	25432.5	SPATA8
19778	cg19795898	0.764902	-59.1389	59.1389	1.2193e-06	-0.0173868	9990.35	0.782289	0	1	9954.29	KIAA1984
9993	cg10073042	0.723723	-59.0616	59.0616	1.24119e-06	-0.0189233	12500.6	0.742647	0	1	12497.1
18787	cg18787449	0.751612	-58.9856	58.9856	1.26312e-06	-0.0178894	5305.03	0.769501	0	1	5362.97	MAGEA2B
5575	cg05569220	0.669678	-58.9004	58.9004	1.28814e-06	-0.0205878	29271.2	0.690266	0	1	29657.8	FLJ44861
8351	cg08402568	0.935472	-58.852	58.852	1.30256e-06	-0.00860983	20928.7	0.944082	0	1	21101.8	MGC34647
4100	cg04048249	0.711703	-58.8372	58.8372	1.307e-06	-0.0192978	8106.69	0.731	0	1	8110.11	APOC3
19995	cg20016416	0.723257	-58.8315	58.8315	1.30872e-06	-0.0189036	5481.65	0.742161	0	1	5488.87	SPTBN2
3909	cg03872376	0.717249	-58.7837	58.7837	1.32321e-06	-0.0191024	4179.83	0.736352	0	1	4245.77	ZP4
22515	cg22545356	0.807376	-58.6251	58.6251	1.37242e-06	-0.0154948	9517	0.822871	0	1	9464.16	MMRN2
3864	cg03835296	0.713457	-58.5565	58.5565	1.39429e-06	-0.0191959	5607.61	0.732653	0	1	5549.07	SLC17A1
16989	cg16953612	0.839189	-58.5565	58.5565	1.39429e-06	-0.0139691	25961	0.853158	0	1	25903.4	DNAJB8
1743	cg01720520	0.638438	-58.4961	58.4961	1.4138e-06	-0.0213157	5477.62	0.659753	0	1	5579.05	LILRB1
4173	cg04123507	0.878822	-58.4262	58.4262	1.43676e-06	-0.0118856	9934.69	0.890707	0	1	9956.85	KRTHB6
2669	cg02658251	0.787494	-58.3201	58.3201	1.47229e-06	-0.0163366	20648.5	0.803831	0	1	20568.1	DEFB4
13954	cg13993218	0.686071	-58.3201	58.3201	1.47229e-06	-0.0200218	15223.6	0.706093	0	1	15221.4	INS
8397	cg08448751	0.861784	-58.2887	58.2887	1.48297e-06	-0.0127853	11837.4	0.874569	0	1	11929.1	SEMA3G
25095	cg25107791	0.737935	-58.2442	58.2442	1.49825e-06	-0.0182933	7430.04	0.756228	0	1	7383.47	CLPS
13039	cg13125510	0.722316	-58.2179	58.2179	1.50733e-06	-0.0188417	9992.78	0.741157	0	1	9986.15	C11orf44
19415	cg19421752	0.648153	-58.2179	58.2179	1.50733e-06	-0.0210322	8132	0.669185	0	1	7952.54	SLC6A18
26732	cg26770882	0.720673	-58.2123	58.2123	1.50927e-06	-0.0188962	6972.4	0.739569	0	1	6979.76	AIPL1
7307	cg07327347	0.767878	-58.1093	58.1093	1.54549e-06	-0.0171225	12637.2	0.785	0	1	12701.5	AQP8
15000	cg15001372	0.804769	-58.0671	58.0671	1.5606e-06	-0.0155409	13422.8	0.82031	0	1	13446.4	GCK
2559	cg02554564	0.789315	-57.9949	57.9949	1.58676e-06	-0.0162131	7773.23	0.805528	0	1	7848.27	NTF3
5658	cg05666713	0.750341	-57.8598	57.8598	1.63688e-06	-0.0177751	29500.3	0.768116	0	1	29449.8	DKFZp434B1231
27379	cg27446185	0.732472	-57.8263	57.8263	1.64958e-06	-0.0184274	8042.37	0.750899	0	1	8115.78	VTCN1
22195	cg22220722	0.749091	-57.8059	57.8059	1.65732e-06	-0.0178137	13257	0.766904	0	1	13360.7	PLA2G2A
12175	cg12242338	0.742416	-57.6686	57.6686	1.71057e-06	-0.0180442	7734	0.76046	0	1	7780.65	TRIM42
4621	cg04569804	0.783025	-57.645	57.645	1.71991e-06	-0.0164357	7869.04	0.79946	0	1	7851.56	CSF1R
9863	cg09936762	0.75719	-57.5789	57.5789	1.74626e-06	-0.0174719	5065.81	0.774662	0	1	5121.18	RAI17
22412	cg22441882	0.646316	-57.5202	57.5202	1.77002e-06	-0.0209588	6949.28	0.667274	0	1	6971.64	SLC18A1
21649	cg21652012	0.854181	-57.4902	57.4902	1.78228e-06	-0.0130955	12830.8	0.867277	0	1	13017.2	GABRP
2836	cg02833725	0.72025	-57.488	57.488	1.7832e-06	-0.0187994	18710.4	0.739049	0	1	18757	ISG20L2
22006	cg22038738	0.849988	-57.488	57.488	1.7832e-06	-0.0133077	24470	0.863296	0	1	24786.2	PLAT
25715	cg25737664	0.856212	-57.4837	57.4837	1.78497e-06	-0.0129887	9590.5	0.869201	0	1	9717.48	SIRPD
16671	cg16609872	0.768043	-57.4481	57.4481	1.79965e-06	-0.0170221	14116.6	0.785065	0	1	13932.8	KCNQ1
2075	cg02046017	0.738922	-57.3946	57.3946	1.82197e-06	-0.0181278	5065.3	0.75705	0	1	5087.98	LOC220070
6293	cg06323290	0.852768	-57.3599	57.3599	1.8366e-06	-0.0131513	10160.4	0.865919	0	1	10293.5	HK1
13597	cg13656062	0.871733	-57.3537	57.3537	1.83921e-06	-0.0121605	11472.6	0.883893	0	1	11502.6	CYP4F2
25082	cg25097436	0.0931925	57.3537	57.3537	1.83921e-06	0.0126445	12748.9	0.080548	0	1	12659.6	RTN1
19902	cg19910382	0.787986	-57.2441	57.2441	1.88622e-06	-0.0161682	7196.94	0.804154	0	1	7299.3	FABP1
2457	cg02441647	0.15019	57.2441	57.2441	1.88623e-06	0.0153974	4945.37	0.134792	0	1	4967.33	COL8A1
12625	cg12687463	0.67945	-57.2441	57.2441	1.88623e-06	-0.0200304	6816.18	0.69948	0	1	6837.85	CFHR1
13299	cg13364756	0.819362	-57.2411	57.2411	1.88752e-06	-0.0147651	5560.66	0.834127	0	1	5593.19	CYP3A43
12255	cg12334759	0.764099	-57.1835	57.1835	1.91269e-06	-0.0171386	10591.2	0.781237	0	1	10599.3	C19orf19
12333	cg12417466	0.633425	-57.1806	57.1806	1.91399e-06	-0.0211912	4151.06	0.654616	0	1	4202.48	ARPP-21
621	cg00601486	0.864075	-57.174	57.174	1.91691e-06	-0.0125447	8211.28	0.87662	0	1	8188.32	H1T2
5763	cg05766474	0.897923	-57.0801	57.0801	1.95879e-06	-0.0106946	15201.4	0.908617	0	1	15263.3	CCL16
15740	cg15712267	0.814056	-57.0328	57.0328	1.98027e-06	-0.0149843	6388.6	0.82904	0	1	6453.47	DNAJB1
3633	cg03608577	0.789653	-57.0088	57.0088	1.99121e-06	-0.0160618	6979.01	0.805715	0	1	7022.23	OR12D3
3801	cg03776060	0.279021	57.0088	57.0088	1.99121e-06	0.0200646	13625.9	0.258956	0	1	13699.6	C9orf58
19849	cg19857541	0.907804	-56.9481	56.9481	2.01924e-06	-0.0101182	13450	0.917922	0	1	13618.6	MORC1
4195	cg04144768	0.70698	-56.9006	56.9006	2.04146e-06	-0.0191374	5175.25	0.726117	0	1	5192.59	DDC
6183	cg06220755	0.796661	-56.8077	56.8077	2.0856e-06	-0.0157331	6797.19	0.812394	0	1	6807.72	RAI2
9526	cg09585781	0.690625	-56.7459	56.7459	2.11547e-06	-0.0196195	17470.3	0.710244	0	1	17586.7	CSH2
16224	cg16158220	0.790012	-56.6229	56.6229	2.17625e-06	-0.0159966	6565.81	0.806009	0	1	6684.94	REGL
16810	cg16762386	0.813471	-56.5703	56.5703	2.20276e-06	-0.0149544	12834.1	0.828426	0	1	12803.9	NR0B2
12264	cg12343082	0.873506	-56.5425	56.5425	2.2169e-06	-0.011984	19207	0.88549	0	1	19201.9	CA5A
16727	cg16673198	0.714965	-56.4947	56.4947	2.24146e-06	-0.0188153	3432.25	0.73378	0	1	3488.51	CPNE4
17307	cg17272094	0.759759	-56.4549	56.4549	2.2621e-06	-0.0172036	5251.72	0.776962	0	1	5256.16	C3orf45
14723	cg14719352	0.754155	-56.3706	56.3706	2.30642e-06	-0.0174069	17085.6	0.771562	0	1	17034.4	FUT1
19969	cg19982860	0.844377	-56.2434	56.2434	2.37496e-06	-0.0134481	12853.6	0.857825	0	1	12962.7	IFNA21
12140	cg12204574	0.136749	56.1907	56.1907	2.40398e-06	0.0146544	18058.3	0.122095	0	1	18216.8	GABRE
501	cg00488300	0.846017	-56.1335	56.1335	2.43585e-06	-0.0133547	15489.9	0.859372	0	1	15502.1	TPSG1
13041	cg13126790	0.735462	-56.108	56.108	2.45019e-06	-0.0180554	25592.3	0.753517	0	1	25838.1	FLJ27255
23256	cg23278885	0.805028	-56.0125	56.0125	2.50467e-06	-0.0152651	10226.5	0.820293	0	1	10242.7	TGM6
27218	cg27278802	0.86188	-56.0125	56.0125	2.50467e-06	-0.0125395	23626	0.87442	0	1	23537.6	CCS
1121	cg01109219	0.750256	-55.9301	55.9301	2.55262e-06	-0.0174905	4254.57	0.767746	0	1	4347.32	RASGRP3
6327	cg06353345	0.657659	-55.9089	55.9089	2.56511e-06	-0.0203911	2752.44	0.678051	0	1	2725.23	OR51B4
4276	cg04254916	0.866026	-55.8954	55.8954	2.57309e-06	-0.0123123	9144.69	0.878338	0	1	9183.08	KRT5
7505	cg07531356	0.85988	-55.8742	55.8742	2.58574e-06	-0.0126268	11252.7	0.872506	0	1	11433.7	INSL6
12658	cg12718562	0.817891	-55.8434	55.8434	2.60414e-06	-0.0146616	7823.52	0.832553	0	1	7827.72	TBC1D21
21954	cg21979032	0.849534	-55.8148	55.8148	2.62134e-06	-0.0131427	12486.2	0.862677	0	1	12607.6	CYP8B1
3042	cg03022541	0.732596	-55.8015	55.8015	2.62937e-06	-0.018107	22993.4	0.750703	0	1	23174.4	DNAJB8
3002	cg02992596	0.71774	-55.7531	55.7531	2.65884e-06	-0.0186055	19488.4	0.736345	0	1	19524.7	MGC27016
21077	cg21109025	0.764937	-55.6649	55.6649	2.71338e-06	-0.0168884	4129.81	0.781826	0	1	4185.79	CCL2
1274	cg01265637	0.847633	-55.6624	55.6624	2.71493e-06	-0.0132196	10311.6	0.860852	0	1	10351.5	C20orf141
13967	cg14003512	0.704366	-55.6185	55.6185	2.74252e-06	-0.0190146	11775.5	0.72338	0	1	11939.5	PLGLB2
18960	cg18967533	0.741114	-55.5513	55.5513	2.78529e-06	-0.0177664	12960.4	0.75888	0	1	13033.5	KLK6
21836	cg21856603	0.752889	-55.5346	55.5346	2.79603e-06	-0.0173302	6016.81	0.770219	0	1	6020.25	ITGAE
10298	cg10375110	0.78199	-55.4738	55.4738	2.83544e-06	-0.0161759	11589.2	0.798165	0	1	11595.7	CHRNA9
456	cg00436603	0.72616	-55.4293	55.4293	2.86464e-06	-0.0182714	11754.5	0.744431	0	1	11701.2	CYP2E1
7966	cg07997737	0.691826	-55.406	55.406	2.88004e-06	-0.0193616	7725.21	0.711188	0	1	7619.52	NRTN
9393	cg09458237	0.62398	-55.3709	55.3709	2.90344e-06	-0.0210695	8380.96	0.64505	0	1	8498.33	HSPA12B
19789	cg19812619	0.730393	-55.3709	55.3709	2.90344e-06	-0.0181154	12926.9	0.748508	0	1	13051.6	ITGB7
8014	cg08044694	0.445944	55.3305	55.3305	2.93054e-06	0.0225859	9396.66	0.423358	0	1	9476.49	BRD4
1891	cg01871963	0.841264	-55.2815	55.2815	2.96381e-06	-0.0134864	16442.5	0.854751	0	1	16441.2	LCN2
6728	cg06736444	0.727181	-55.2815	55.2815	2.96381e-06	-0.0182109	17413.8	0.745392	0	1	17468.4	SRRM2
24048	cg24098951	0.0614632	55.2815	55.2815	2.96381e-06	0.0107344	19160.8	0.0507288	0	1	19128.1	LRP12
10748	cg10853416	0.631995	-55.2587	55.2587	2.97944e-06	-0.0208746	11276.5	0.652869	0	1	11493.1	MS4A7
11443	cg11504739	0.771232	-55.241	55.241	2.9916e-06	-0.0165748	10050.9	0.787806	0	1	10112.7	SCGB1A1
10210	cg10282491	0.635845	-55.1666	55.1666	3.04327e-06	-0.0207728	16095.3	0.656618	0	1	16330.3	CLDN9
9418	cg09480837	0.764895	-55.0486	55.0486	3.12709e-06	-0.0167981	10036.5	0.781693	0	1	10099.2	PLCE1
2350	cg02311163	0.781679	-55.0125	55.0125	3.15323e-06	-0.0161223	5143.67	0.797801	0	1	5180.43	SEMG2
12071	cg12114524	0.740367	-54.8769	54.8769	3.25319e-06	-0.017689	6488.88	0.758055	0	1	6513.51	TNNI1
19939	cg19954000	0.806722	-54.8458	54.8458	3.27655e-06	-0.0150356	10152.1	0.821758	0	1	10266.2	FGF1
15759	cg15736336	0.798576	-54.8162	54.8162	3.29898e-06	-0.0153865	5656.62	0.813962	0	1	5750.8	PLCZ1
16729	cg16678925	0.689886	-54.6923	54.6923	3.39443e-06	-0.0192988	6053.65	0.709185	0	1	6040.57	OR1A2
26611	cg26647600	0.708434	-54.6923	54.6923	3.39443e-06	-0.0187348	4981.81	0.727169	0	1	5047.83	CCR8
16512	cg16431978	0.740959	-54.6602	54.6602	3.41965e-06	-0.0176344	14684	0.758594	0	1	14800.1	KRTAP13-3
13636	cg13694749	0.856749	-54.6123	54.6123	3.45753e-06	-0.012647	16898	0.869396	0	1	16691.1	SCN4A
23316	cg23338993	0.725517	-54.6123	54.6123	3.45753e-06	-0.0181627	7045.39	0.74368	0	1	7171.81	UGT1A6
27277	cg27341860	0.898696	-54.4023	54.4023	3.62884e-06	-0.0104134	26177	0.90911	0	1	26193.9	OR2L13
26352	cg26368842	0.841913	-54.3185	54.3185	3.69959e-06	-0.0133476	15174.5	0.855261	0	1	15270.5	PIP5K2A
18442	cg18432384	0.851074	-54.3127	54.3127	3.70448e-06	-0.0128989	11146.8	0.863973	0	1	11136.6	FLJ32771
2387	cg02347487	0.607957	-54.2918	54.2918	3.72241e-06	-0.0211883	10496.5	0.629145	0	1	10697.6	NALP14
16990	cg16954341	0.222499	54.2723	54.2723	3.73909e-06	0.0178466	13954.4	0.204652	0	1	14131.8	SCGN
16162	cg16084788	0.871384	-54.2634	54.2634	3.74677e-06	-0.0118635	10764.5	0.883247	0	1	10864.8	SLC2A7
18828	cg18833140	0.698615	-54.2393	54.2393	3.76761e-06	-0.0189636	4613.85	0.717578	0	1	4703.09	HABP2
14916	cg14912034	0.679056	-54.1833	54.1833	3.81655e-06	-0.0195209	3934.59	0.698577	0	1	3963.63	LYZL2
14038	cg14074117	0.615889	-54.1172	54.1172	3.87505e-06	-0.0210034	8181.53	0.636892	0	1	8121.99	MGC35212
13342	cg13412615	0.736002	-54.1157	54.1157	3.87645e-06	-0.0177255	12793.8	0.753727	0	1	12890.7	KCNK4
5109	cg05065037	0.0827412	54.0741	54.0741	3.91372e-06	0.0117588	8268.91	0.0709824	0	1	8338.67	ZCCHC6
14190	cg14209870	0.837351	-54.0388	54.0388	3.94566e-06	-0.0135312	7223.04	0.850882	0	1	7423.2	TAS2R5
4943	cg04893119	0.74253	-54.0312	54.0312	3.9526e-06	-0.0174809	3808.95	0.760011	0	1	3843.55	PI15
25299	cg25313204	0.44484	53.9168	53.9168	4.05807e-06	0.0223007	23175.7	0.422539	0	1	23206.8	SLC22A3
24796	cg24825722	0.698802	-53.8333	53.8333	4.13687e-06	-0.0188912	12618.3	0.717693	0	1	12769.8	ACADVL
24840	cg24875415	0.820781	-53.7895	53.7895	4.17875e-06	-0.0142725	6598.31	0.835054	0	1	6562.64	CST4
20025	cg20047055	0.692072	-53.7526	53.7526	4.21448e-06	-0.0190774	18835.9	0.711149	0	1	18814.5	KLRC1
1530	cg01507173	0.780875	-53.6994	53.6994	4.26638e-06	-0.0159731	4808.64	0.796848	0	1	4881.24	IL1F5
25355	cg25372195	0.697503	-53.6994	53.6994	4.26638e-06	-0.0189072	10097	0.71641	0	1	10119.5	DCD
18118	cg18109798	0.686207	-53.6183	53.6183	4.34679e-06	-0.0192239	6829.14	0.70543	0	1	6884.91	SLCO1C1
21023	cg21057494	0.813601	-53.5598	53.5598	4.40579e-06	-0.0145662	15636.7	0.828167	0	1	15594	CLEC3B
5731	cg05730092	0.808481	-53.495	53.495	4.47197e-06	-0.014784	7072.22	0.823265	0	1	7091.72	KIAA1446
15771	cg15742700	0.628773	-53.3573	53.3573	4.6161e-06	-0.0206038	3569.7	0.649377	0	1	3624.02	BLK
21082	cg21115977	0.679081	-53.356	53.356	4.61742e-06	-0.0193801	18901.5	0.698461	0	1	18943.9	GDF2
20401	cg20437604	0.80203	-53.3379	53.3379	4.63672e-06	-0.0150434	12077.7	0.817073	0	1	12173.7	ANXA9
4496	cg04459030	0.724685	-53.3309	53.3309	4.64418e-06	-0.0179889	10476.5	0.742674	0	1	10591	GHRH
11525	cg11608424	0.887016	-53.3008	53.3008	4.67649e-06	-0.0109449	11324.2	0.897961	0	1	11454.9	LOC253012
25208	cg25214366	0.792336	-53.2984	53.2984	4.67912e-06	-0.0154467	9291.35	0.807783	0	1	9241.36	DEFB103A
26193	cg26209676	0.240112	-53.2527	53.2527	4.72862e-06	-0.0188533	6307.65	0.258966	0	1	6433.68	ZNF581
25705	cg25725843	0.170868	53.2107	53.2107	4.77453e-06	0.0157416	17601.1	0.155127	0	1	17920.7	ST6GAL2
24188	cg24243265	0.767603	-53.0919	53.0919	4.90695e-06	-0.0164113	3603.63	0.784014	0	1	3645.33	MLZE
21587	cg21602160	0.75923	-52.9403	52.9403	5.08129e-06	-0.0167091	8458.71	0.775939	0	1	8629.29	AOC3
16851	cg16799087	0.795954	-52.936	52.936	5.08624e-06	-0.0152482	9140.59	0.811202	0	1	9100.87	PRDM7
4521	cg04484789	0.784967	-52.9182	52.9182	5.10717e-06	-0.0156995	5304.07	0.800667	0	1	5366.25	KRT25B
6999	cg07014174	0.675294	-52.8317	52.8317	5.2099e-06	-0.019393	3803.04	0.694687	0	1	3812.5	KRTAP11-1
23101	cg23131777	0.711834	-52.7626	52.7626	5.29345e-06	-0.0183151	15252.1	0.730149	0	1	15366.2	ADAM30
14708	cg14706739	0.825842	-52.6098	52.6098	5.48305e-06	-0.0138988	15275.2	0.839741	0	1	15245.9	EPB49
3550	cg03533058	0.85873	-52.5822	52.5822	5.518e-06	-0.0123294	15812.1	0.871059	0	1	15747.7	NR4A1
17502	cg17474651	0.748234	-52.5822	52.5822	5.518e-06	-0.0170602	4427.53	0.765295	0	1	4500.06	MAGEC3
4435	cg04409427	0.834069	-52.5659	52.5659	5.53878e-06	-0.013513	6697.93	0.847582	0	1	6854.79	KCNE2
11433	cg11494699	0.75849	-52.5653	52.5653	5.53954e-06	-0.0166804	8957.58	0.77517	0	1	9071	RAG1
20534	cg20587968	0.792653	-52.4681	52.4681	5.66486e-06	-0.0153232	21992.2	0.807976	0	1	22106.7	UCN3
1087	cg01072821	0.665925	-52.4496	52.4496	5.68909e-06	-0.0195724	19083.8	0.685497	0	1	19309.1	UNQ9391
25817	cg25839227	0.704733	-52.1565	52.1565	6.08627e-06	-0.0184395	13829.2	0.723172	0	1	13908	ABI3
19478	cg19481686	0.0832929	52.1268	52.1268	6.12806e-06	0.0115916	11166.1	0.0717012	0	1	11199.2	CDKN2B
21049	cg21085768	0.736472	-52.0887	52.0887	6.18196e-06	-0.0174	17977	0.753872	0	1	18175.4	PRSS21
3568	cg03548857	0.205316	52.0662	52.0662	6.21408e-06	0.0169041	4680.89	0.188412	0	1	4716.94	FFAR2
4544	cg04505023	0.735213	-52.0641	52.0641	6.21713e-06	-0.0174381	15120	0.752651	0	1	15196.4	SPRR1A
26993	cg27040030	0.134373	52.052	52.052	6.23453e-06	0.0140307	24642.8	0.120342	0	1	24574.3	PDIA2
9663	cg09736922	0.715141	-51.916	51.916	6.43278e-06	-0.0180761	15987.5	0.733217	0	1	16134.6	THPO
2786	cg02784874	0.684184	-51.903	51.903	6.45213e-06	-0.0189933	22106.2	0.703177	0	1	22281.4	KRT9
17405	cg17386181	0.778368	-51.8999	51.8999	6.45675e-06	-0.0158235	7717.06	0.794191	0	1	7678.84	MT1B
17590	cg17571291	0.295774	51.839	51.839	6.54787e-06	0.0196168	7862.52	0.276157	0	1	7954.67	BLVRA
16633	cg16558203	0.777929	-51.8337	51.8337	6.55588e-06	-0.0158309	6400.89	0.79376	0	1	6509.93	SLC22A14
27024	cg27069753	0.725834	-51.7857	51.7857	6.62874e-06	-0.0177079	16955.7	0.743541	0	1	17043.9	ELA3B
4977	cg04929865	0.772226	-51.7816	51.7816	6.63505e-06	-0.0160446	12675.7	0.78827	0	1	12921.9	BGN
19466	cg19465374	0.860872	-51.7816	51.7816	6.63505e-06	-0.0121357	13124.8	0.873008	0	1	13283.6	AZGP1
27041	cg27087809	0.751648	-51.7245	51.7245	6.72283e-06	-0.0168058	8507.26	0.768453	0	1	8528.75	ACSBG1
23633	cg23674788	0.749553	-51.6625	51.6625	6.81944e-06	-0.016872	10976.2	0.766425	0	1	10995	KRTHA2
15614	cg15602735	0.777425	-51.57	51.57	6.96625e-06	-0.0158128	11279.5	0.793238	0	1	11327.5	MAGEC2
18338	cg18338296	0.899483	-51.5477	51.5477	7.0021e-06	-0.0101133	11383.4	0.909597	0	1	11459.9	THRSP
9542	cg09600520	0.719044	-51.4204	51.4204	7.21044e-06	-0.0178701	5065.96	0.736914	0	1	5093.34	CDYL
4706	cg04650786	0.0759133	51.3485	51.3485	7.33078e-06	0.0111328	16955.4	0.0647805	0	1	17097.9	OSTM1
4770	cg04721098	0.726266	-51.3449	51.3449	7.33694e-06	-0.0176224	7388.18	0.743889	0	1	7599.94	CACNG3
5039	cg04995095	0.693282	-51.3449	51.3449	7.33694e-06	-0.0186363	6190.81	0.711919	0	1	6261.94	CD300E
10771	cg10876928	0.641058	-51.3449	51.3449	7.33694e-06	-0.0199681	11321.5	0.661026	0	1	11311.3	SDC4
20752	cg20797216	0.722989	-51.3449	51.3449	7.33694e-06	-0.0177286	14953.6	0.740718	0	1	14868.4	FBN3
24198	cg24252809	0.739764	-51.3449	51.3449	7.33694e-06	-0.0171683	7274.33	0.756932	0	1	7313.35	MRGPRX1
7187	cg07197059	0.771965	-51.2721	51.2721	7.46081e-06	-0.0159801	14682.2	0.787945	0	1	14476.6	EFS
21845	cg21870662	0.194208	51.2495	51.2495	7.49986e-06	0.0163702	13816.2	0.177838	0	1	13816.5	TSR1
22735	cg22777952	0.0774149	51.2296	51.2296	7.53418e-06	0.0111953	13287.2	0.0662196	0	1	13364	FOXB1
16660	cg16601385	0.691059	-51.0369	51.0369	7.87599e-06	-0.0186496	9642.13	0.709709	0	1	9683.14	CFD
15528	cg15532088	0.855118	-51.0252	51.0252	7.89727e-06	-0.012334	10982.8	0.867452	0	1	10999.6	C17orf66
5493	cg05483509	0.0891832	50.8479	50.8479	8.22635e-06	0.0117533	9866.38	0.0774299	0	1	9998.24	ATP6V0C
10405	cg10490064	0.739667	-50.8479	50.8479	8.22635e-06	-0.0170941	5152.2	0.756761	0	1	5196.11	CRYBB2
15527	cg15531099	0.489061	-50.7646	50.7646	8.38567e-06	-0.0217696	10994	0.51083	0	1	10828.4	LCE1D
27406	cg27472295	0.0828616	50.7451	50.7451	8.42341e-06	0.0114253	9879.15	0.0714363	0	1	9990.44	TPBG
22428	cg22461018	0.710976	-50.7402	50.7402	8.4329e-06	-0.0180106	6576.27	0.728987	0	1	6698.07	MORF4
2954	cg02946850	0.704995	-50.6793	50.6793	8.55201e-06	-0.0181818	6086.7	0.723177	0	1	6129.25	GRM8
22456	cg22477971	0.731327	-50.6793	50.6793	8.55201e-06	-0.0173485	6474.61	0.748676	0	1	6464.98	C1QB
23354	cg23382741	0.790566	-50.6754	50.6754	8.55969e-06	-0.0151616	10197.1	0.805728	0	1	10255.3	PPP1R14D
17323	cg17291001	0.787805	-50.6506	50.6506	8.60885e-06	-0.0152691	12219.9	0.803074	0	1	12218.9	SERPINA13
4047	cg03998348	0.751758	-50.6111	50.6111	8.68742e-06	-0.0166314	4129.75	0.76839	0	1	4256.39	TMCO5
9929	cg10009830	0.080141	50.4847	50.4847	8.94386e-06	0.01126	20509.8	0.068881	0	1	20729.1	FLJ14503
17257	cg17229197	0.781602	-50.4675	50.4675	8.97948e-06	-0.0154905	5885.26	0.797093	0	1	5874.67	KCNQ1
14440	cg14448104	0.812767	-50.4616	50.4616	8.99175e-06	-0.0142043	7269.36	0.826971	0	1	7376.48	MATN4
14956	cg14948822	0.740602	-50.4584	50.4584	8.99837e-06	-0.0169982	3880.91	0.7576	0	1	3905.23	MPV17
23963	cg24010336	0.59357	-50.2767	50.2767	9.38279e-06	-0.0206793	8970.42	0.61425	0	1	8859.68	FBXO17
8016	cg08045757	0.782531	-50.2282	50.2282	9.48807e-06	-0.0154207	7538.64	0.797952	0	1	7416.96	HDAC7A
724	cg00691625	0.834423	-50.2162	50.2162	9.51433e-06	-0.0132133	17507.8	0.847636	0	1	17299.1	NR5A1
12086	cg12128839	0.56482	-50.1807	50.1807	9.5925e-06	-0.0210696	7798.64	0.58589	0	1	7803.32	HOXA5
26539	cg26574610	0.702816	-50.1453	50.1453	9.67095e-06	-0.0181566	6306.76	0.720972	0	1	6269.96	VPREB3
11836	cg11880010	0.686634	-50.1351	50.1351	9.69373e-06	-0.0186172	2965.35	0.705251	0	1	2999.3	KIAA0367
23347	cg23370883	0.653201	-50.0433	50.0433	9.90079e-06	-0.0194555	6155.03	0.672656	0	1	6156.03	MYL7
24322	cg24365867	0.873142	-49.9794	49.9794	1.00475e-05	-0.0113323	10767.2	0.884474	0	1	10715.9	MRVI1
23216	cg23240895	0.766402	-49.8842	49.8842	1.02702e-05	-0.0159891	10963.3	0.782391	0	1	11052.5	PRR5
21031	cg21066636	0.603787	-49.8481	49.8481	1.03558e-05	-0.0204268	11748.2	0.624214	0	1	11652.3	TM4SF5
24319	cg24363955	0.753179	-49.8266	49.8266	1.04073e-05	-0.0164622	5472.94	0.769641	0	1	5533.53	FLJ14054
3690	cg03673470	0.750608	-49.814	49.814	1.04377e-05	-0.016551	2991.32	0.767159	0	1	3054.2	ZP4
12600	cg12654845	0.730104	-49.8033	49.8033	1.04634e-05	-0.0172477	3732.03	0.747352	0	1	3773.07	CLDN2
19336	cg19346193	0.852431	-49.7968	49.7968	1.04789e-05	-0.0123234	10101.4	0.864754	0	1	10174.8	UROS
7127	cg07126559	0.811107	-49.7781	49.7781	1.05243e-05	-0.0141845	8595.27	0.825291	0	1	8636.27	SGCG
19623	cg19635695	0.675027	-49.7781	49.7781	1.05243e-05	-0.0188652	3494.48	0.693892	0	1	3457.7	PDE6C
3928	cg03886110	0.33133	49.7673	49.7673	1.05504e-05	0.0200236	17283.4	0.311307	0	1	17350.7	PECAM1
9009	cg09068492	0.155812	49.7583	49.7583	1.05724e-05	0.0146488	10574.3	0.141163	0	1	10601.1	CALCA
10111	cg10189695	0.101143	49.7583	49.7583	1.05724e-05	0.0122126	17942.8	0.0889309	0	1	17911.5	GPR78
18062	cg18053607	0.712138	-49.7384	49.7384	1.06209e-05	-0.0178027	11435	0.729941	0	1	11553.5	PIB5PA
26388	cg26408003	0.886997	-49.7177	49.7177	1.06716e-05	-0.0105969	9348.16	0.897594	0	1	9401.34	C14orf94
12994	cg13062935	0.0838626	49.6823	49.6823	1.0759e-05	0.0113596	8712.99	0.072503	0	1	8630.65	MRGPRX2
7679	cg07705908	0.758865	-49.6746	49.6746	1.07781e-05	-0.016228	13698.2	0.775093	0	1	13625.1	SPDEF
6854	cg06852744	0.878898	-49.6412	49.6412	1.08611e-05	-0.0110028	13029.7	0.8899	0	1	13033.8	AEBP1
9014	cg09072120	0.103281	49.6412	49.6412	1.08611e-05	0.0122993	22547.8	0.090982	0	1	22455.3	PRTFDC1
6207	cg06241300	0.777454	-49.6046	49.6046	1.09531e-05	-0.0155215	4120.67	0.792975	0	1	4159.17	APOM
11754	cg11812202	0.731861	-49.559	49.559	1.10688e-05	-0.0171439	3142.6	0.749004	0	1	3197.08	PNLIP
10929	cg11015241	0.854387	-49.5317	49.5317	1.11387e-05	-0.0121955	6596.39	0.866583	0	1	6637.52	ATP10A
27524	cg27600794	0.824273	-49.51	49.51	1.11943e-05	-0.0135745	6456.18	0.837848	0	1	6526.84	PNLIPRP1
18360	cg18356799	0.737711	-49.3885	49.3885	1.15119e-05	-0.0169225	5212.74	0.754633	0	1	5237.12	DSC1
12146	cg12207371	0.687223	-49.3631	49.3631	1.15794e-05	-0.0184602	2915.32	0.705684	0	1	2970.87	CD163
20556	cg20615832	0.315694	-49.3565	49.3565	1.15972e-05	-0.0200263	23990.6	0.33572	0	1	24317.2	PF4V1
7769	cg07810156	0.814059	-49.3266	49.3266	1.16772e-05	-0.013994	16827.7	0.828053	0	1	16897.2	PDZK1IP1
22911	cg22951794	0.754561	-49.3266	49.3266	1.16772e-05	-0.0163273	14055.5	0.770888	0	1	14139.7	OR10A5
9504	cg09555879	0.848263	-49.2602	49.2602	1.18571e-05	-0.0124531	14683.1	0.860716	0	1	14655.8	GRIK5
17328	cg17296166	0.0943661	49.2442	49.2442	1.1901e-05	0.011826	11431.9	0.0825402	0	1	11475.3	FLJ10781
14931	cg14920334	0.4811	-49.1832	49.1832	1.20693e-05	-0.0214518	6755.66	0.502552	0	1	6748.31	GALNT8
18354	cg18350391	0.670929	-49.1575	49.1575	1.21408e-05	-0.0188527	16698.6	0.689782	0	1	16686.5	IL32
5500	cg05492113	0.768479	-49.1373	49.1373	1.21973e-05	-0.01579	12266.2	0.784269	0	1	12322.5	TUB
9152	cg09214254	0.130961	49.1373	49.1373	1.21973e-05	0.0135023	13162.3	0.117459	0	1	13154.1	SMOC2
19523	cg19530885	0.739456	-49.1373	49.1373	1.21973e-05	-0.0168197	6015.78	0.756275	0	1	6058.95	SCGB3A2
13098	cg13181284	0.831671	-49.1063	49.1063	1.2285e-05	-0.0131927	13393.8	0.844864	0	1	13459	KRT6B
14030	cg14062083	0.757478	-49.0996	49.0996	1.23039e-05	-0.0161853	4524.53	0.773663	0	1	4564.5	KRTAP13-4
105	cg00095526	0.750793	-49.0274	49.0274	1.251e-05	-0.0164119	17169.3	0.767205	0	1	16996.8	CACNA1S
3962	cg03923277	0.480523	49.0149	49.0149	1.2546e-05	0.0214212	40960.4	0.459102	0	1	40629.3	TDG
11259	cg11323198	0.0984101	48.9626	48.9626	1.26983e-05	0.011987	23596.3	0.0864232	0	1	23534.5	CDH8
5995	cg06007645	0.779038	-48.9568	48.9568	1.27152e-05	-0.0153621	4880.56	0.7944	0	1	4953.24	C1orf175
22855	cg22889448	0.79525	-48.9545	48.9545	1.27218e-05	-0.0147222	10958.6	0.809972	0	1	11006	EMR1
2787	cg02786019	0.695298	-48.9114	48.9114	1.28488e-05	-0.0181502	5928.87	0.713448	0	1	5956.31	TRPV6
26595	cg26628847	0.676091	-48.9114	48.9114	1.28488e-05	-0.0186707	12298.1	0.694762	0	1	12416.7	PIP
15195	cg15201877	0.126422	48.8838	48.8838	1.29305e-05	0.0132668	29400.9	0.113155	0	1	28983.7	PTGER3
19705	cg19728223	0.137997	-48.8269	48.8269	1.31013e-05	-0.0143715	24166.4	0.152369	0	1	25024.6	KCNQ1
10273	cg10345936	0.677925	-48.8213	48.8213	1.31181e-05	-0.0186062	5786.44	0.696531	0	1	5855.38	SLC36A2
21391	cg21414251	0.58974	-48.7612	48.7612	1.3301e-05	-0.0204266	4225.49	0.610167	0	1	4183.91	OR12D2
4112	cg04057858	0.645242	-48.7473	48.7473	1.33436e-05	-0.0193807	13492.4	0.664623	0	1	13703.3	UNQ9391
24981	cg25013053	0.744556	-48.7473	48.7473	1.33436e-05	-0.0165807	5000.35	0.761136	0	1	4991.77	UNC45B
26300	cg26312150	0.0958812	48.7473	48.7473	1.33436e-05	0.0118387	22518.7	0.0840425	0	1	22582.1	TWIST1
6241	cg06275635	0.706905	-48.7314	48.7314	1.33925e-05	-0.0177789	3239.25	0.724684	0	1	3271.13	PGLYRP3
9918	cg10000775	0.11372	48.73	48.73	1.33968e-05	0.0126722	9262.72	0.101047	0	1	9125.64	PDLIM3
17107	cg17074151	0.561438	-48.7172	48.7172	1.34362e-05	-0.0207976	4263.82	0.582236	0	1	4288.19	UNQ2541
24259	cg24323726	0.722206	-48.6684	48.6684	1.3588e-05	-0.0172993	16033.6	0.739505	0	1	16272.8	ZBED2
2744	cg02737335	0.768988	-48.5449	48.5449	1.39801e-05	-0.015677	13213.1	0.784665	0	1	13069.3	ARHGEF16
11642	cg11706163	0.691146	-48.5157	48.5157	1.40745e-05	-0.0181929	6943.37	0.709339	0	1	6970.95	C9
22475	cg22496683	0.624457	-48.5157	48.5157	1.40745e-05	-0.0197702	20707.2	0.644227	0	1	20856	MGC27016
14055	cg14088161	0.641088	-48.4956	48.4956	1.41396e-05	-0.0194228	6396.97	0.660511	0	1	6375.38	ACTL6B
14005	cg14045072	0.720445	-48.3654	48.3654	1.457e-05	-0.0173058	5784.68	0.73775	0	1	5840.38	GPR116
613	cg00592315	0.733547	-48.3456	48.3456	1.46367e-05	-0.0168832	3138.93	0.75043	0	1	3324.05	C14orf152
16878	cg16831889	0.685564	-48.3348	48.3348	1.4673e-05	-0.0183139	3199.26	0.703878	0	1	3222.89	HDC
13362	cg13434842	0.220481	48.271	48.271	1.48901e-05	0.0168134	14742.8	0.203668	0	1	14791.5	GATA4
17809	cg17788013	0.734674	-48.271	48.271	1.48901e-05	-0.0168337	4300.37	0.751508	0	1	4433.81	SPINK5
11416	cg11481351	0.818091	-48.2697	48.2697	1.48947e-05	-0.0136745	5215.29	0.831765	0	1	5253.69	FNDC7
17775	cg17754680	0.751563	-48.2697	48.2697	1.48947e-05	-0.0162599	14257.3	0.767823	0	1	14318.4	NPC1L1
23368	cg23400451	0.700589	-48.2527	48.2527	1.49532e-05	-0.0178785	3087.01	0.718467	0	1	3113.6	MYH4
13838	cg13882988	0.735633	-48.2426	48.2426	1.4988e-05	-0.0167946	4417.93	0.752428	0	1	4476.19	MBL2
9167	cg09227563	0.0865627	48.183	48.183	1.51948e-05	0.0113232	23599.7	0.0752395	0	1	23504	CDC42EP5
20950	cg20993403	0.682427	-48.1629	48.1629	1.52656e-05	-0.0183643	10211.3	0.700791	0	1	10305.3	EPB41L1
15076	cg15077070	0.732744	-48.1047	48.1047	1.54714e-05	-0.0168671	3283.45	0.749611	0	1	3308.6	IL1RL2
21376	cg21400896	0.689978	-48.0954	48.0954	1.55045e-05	-0.0181483	12575.1	0.708127	0	1	12715.8	ABI3
17518	cg17496921	0.358559	48.0929	48.0929	1.55136e-05	0.0201696	10857.8	0.338389	0	1	10969.2	TSPAN16
2817	cg02812142	0.698846	-48.0879	48.0879	1.55315e-05	-0.0178968	5350.95	0.716743	0	1	5425.25	ACMSD
13458	cg13519373	0.609977	-48.0879	48.0879	1.55315e-05	-0.0199509	4113.07	0.629928	0	1	4059.42	IL8RA
19614	cg19623751	0.795277	-48.0339	48.0339	1.57258e-05	-0.0145842	5918.59	0.809861	0	1	5986.18	CEACAM7
15659	cg15640375	0.138851	48.0223	48.0223	1.57677e-05	0.0136895	21884.3	0.125162	0	1	21805.2	PRG2
7235	cg07258507	0.669834	-47.979	47.979	1.59258e-05	-0.0186526	14029.7	0.688487	0	1	14048.5	IL17E
12107	cg12163490	0.0797611	47.8882	47.8882	1.62623e-05	0.0109562	16253.5	0.0688048	0	1	16332	CDH11
19084	cg19099213	0.751436	-47.8711	47.8711	1.63265e-05	-0.0161971	3537.65	0.767634	0	1	3573.82	SPP2
20075	cg20092728	0.723856	-47.8711	47.8711	1.63265e-05	-0.0171091	5263.72	0.740965	0	1	5372.71	SLC5A12
22923	cg22960952	0.662938	-47.8711	47.8711	1.63265e-05	-0.0188014	7722.47	0.68174	0	1	7854.86	FLJ23657
15219	cg15227610	0.667676	-47.8634	47.8634	1.63553e-05	-0.0186834	7771.52	0.686359	0	1	7731.5	CRYAB
774	cg00745543	0.864322	-47.7676	47.7676	1.67201e-05	-0.0115109	9463.89	0.875833	0	1	9363.72	H1T2
17134	cg17100200	0.8787	-47.7527	47.7527	1.67778e-05	-0.0108068	15720	0.889507	0	1	15869.2	GUCA2B
17938	cg17910564	0.699268	-47.7347	47.7347	1.68473e-05	-0.0178215	6602.2	0.717089	0	1	6631.12	VDAC3
3112	cg03097995	0.572691	-47.6969	47.6969	1.69946e-05	-0.0204447	25278.3	0.593136	0	1	25398	TNNI3
22390	cg22418909	0.1175	47.6738	47.6738	1.70853e-05	0.0127098	19965	0.10479	0	1	19718.2	SFRP1
27279	cg27342801	0.783599	-47.6161	47.6161	1.73136e-05	-0.0149806	8126.09	0.79858	0	1	8238.81	REG3A
19034	cg19033555	0.771489	-47.5931	47.5931	1.74056e-05	-0.0154339	7135.37	0.786923	0	1	7218.18	DEFB1
2028	cg01999333	0.69823	-47.4914	47.4914	1.78179e-05	-0.0178092	5376.44	0.716039	0	1	5448.02	CASP14
9621	cg09676390	0.696602	-47.478	47.478	1.78731e-05	-0.0178522	29601.7	0.714454	0	1	29601	ADARB1
24850	cg24887211	0.718181	-47.4685	47.4685	1.79121e-05	-0.0172169	6154.98	0.735398	0	1	6212.23	C14orf166B
10536	cg10624445	0.692668	-47.4633	47.4633	1.79335e-05	-0.0179578	24252.7	0.710626	0	1	24423.7	CNGB1
1491	cg01469547	0.816562	-47.4452	47.4452	1.80084e-05	-0.0136253	4467.52	0.830187	0	1	4522.77	OR5P3
10114	cg10193817	0.102913	47.4313	47.4313	1.80662e-05	0.0120129	14863.1	0.0908996	0	1	14914.2	IGSF4
9443	cg09508556	0.866635	-47.4309	47.4309	1.8068e-05	-0.0113601	15956.5	0.877995	0	1	15993.9	PSORS1C2
19222	cg19226099	0.688304	-47.3952	47.3952	1.8217e-05	-0.018063	27901	0.706367	0	1	27876.8	MC3R
3601	cg03573747	0.821494	-47.3901	47.3901	1.82384e-05	-0.0134068	7498.91	0.834901	0	1	7594.61	ADIPOQ
14392	cg14401454	0.841896	-47.3155	47.3155	1.85547e-05	-0.0125003	5048.38	0.854397	0	1	5118.69	C14orf8
22113	cg22152667	0.890537	-47.295	47.295	1.86424e-05	-0.0101634	7135.11	0.9007	0	1	7302.73	OCM
17062	cg17032587	0.650289	-47.2905	47.2905	1.86618e-05	-0.0189828	5978.12	0.669272	0	1	6014.7	CNGA2
20743	cg20791593	0.832557	-47.2155	47.2155	1.89868e-05	-0.0129042	11403	0.845461	0	1	11473.5	NEU4
4380	cg04349727	0.675471	-47.1808	47.1808	1.91389e-05	-0.0183606	5727.94	0.693832	0	1	5829.11	KLK5
9316	cg09395732	0.817231	-47.1185	47.1185	1.94154e-05	-0.0135526	20512.7	0.830784	0	1	20528.5	SLC6A11
15420	cg15423764	0.738408	-47.1173	47.1173	1.94211e-05	-0.0165129	3495.11	0.75492	0	1	3556.86	GLYAT
10535	cg10620457	0.687223	-47.1151	47.1151	1.94306e-05	-0.0180407	2610.82	0.705264	0	1	2672.12	C8B
5512	cg05500074	0.836115	-47.0396	47.0396	1.97716e-05	-0.0127245	30951.6	0.84884	0	1	30632.3	TSKS
7618	cg07654843	0.837289	-47.0317	47.0317	1.98074e-05	-0.0126709	5150.91	0.84996	0	1	5240.62	MYO18B
23328	cg23350580	0.822837	-47.0256	47.0256	1.98355e-05	-0.0133005	34024.6	0.836138	0	1	34076.1	TBC1D3C
15670	cg15648315	0.857788	-46.992	46.992	1.99893e-05	-0.0117291	10911.9	0.869517	0	1	11012.5	FLJ26443
27280	cg27344326	0.775121	-46.9515	46.9515	2.01766e-05	-0.0151987	15175.2	0.79032	0	1	15251.7	DMRTC1
24727	cg24765446	0.738158	-46.9506	46.9506	2.01811e-05	-0.0164919	4242.33	0.75465	0	1	4239.66	WFDC6
18052	cg18043195	0.874077	-46.9327	46.9327	2.02643e-05	-0.0109433	13206.4	0.885021	0	1	13267.8	C9orf138
1163	cg01145396	0.66959	-46.9295	46.9295	2.02794e-05	-0.0184582	7613.87	0.688048	0	1	7698.23	CHRNG
14354	cg14366490	0.715185	-46.8829	46.8829	2.04978e-05	-0.0172022	13330.5	0.732387	0	1	13374.4	TXNL6
4005	cg03959079	0.713361	-46.8085	46.8085	2.08519e-05	-0.0172448	7108.92	0.730606	0	1	7136.12	TAB3
13808	cg13853198	0.148521	46.8085	46.8085	2.08519e-05	0.0139228	4894.23	0.134598	0	1	4893.91	FCER1G
2459	cg02442161	0.665795	-46.7969	46.7969	2.09081e-05	-0.018526	4918.48	0.684321	0	1	5017.99	PI3
1215	cg01197831	0.811383	-46.7712	46.7712	2.10319e-05	-0.0137466	9353.6	0.82513	0	1	9433.76	FBP2
18149	cg18133966	0.615145	-46.6922	46.6922	2.14183e-05	-0.019576	6542.79	0.634721	0	1	6566.38	PLA2G1B
5106	cg05064181	0.813962	-46.6756	46.6756	2.15001e-05	-0.0136268	5483.29	0.827589	0	1	5541.75	ABLIM1
10875	cg10968815	0.834907	-46.6604	46.6604	2.15754e-05	-0.0127273	8176.35	0.847634	0	1	8276.62	BPIL1
15590	cg15582789	0.242973	46.571	46.571	2.2024e-05	0.0172205	6277.65	0.225753	0	1	6300.87	SLC35D2
5774	cg05779068	0.701598	-46.5362	46.5362	2.22016e-05	-0.0175384	3468.11	0.719136	0	1	3503.43	OR2W1
13723	cg13782134	0.806529	-46.5362	46.5362	2.22016e-05	-0.0139135	9014.64	0.820442	0	1	9023.48	UNQ2446
11624	cg11692021	0.758011	-46.4872	46.4872	2.24532e-05	-0.0157428	10690	0.773754	0	1	10755.1	GNB3
9348	cg09422355	0.782165	-46.2766	46.2766	2.35688e-05	-0.0148348	20330.1	0.796999	0	1	20192.7	CABP5
1663	cg01643624	0.747127	-46.2691	46.2691	2.36097e-05	-0.0160841	10391	0.763211	0	1	10419.7	C11orf16
3163	cg03140978	0.845979	-46.2074	46.2074	2.39477e-05	-0.0121794	9392.23	0.858159	0	1	9463.71	C1orf201
13020	cg13098960	0.764739	-46.2074	46.2074	2.39477e-05	-0.0154638	8605.81	0.780202	0	1	8667.32	SOX15
13568	cg13625403	0.917173	-46.175	46.175	2.4127e-05	-0.00867188	12271.8	0.925845	0	1	12305.7	TRIM29
5329	cg05322019	0.858912	-46.1697	46.1697	2.41562e-05	-0.0115807	15763.9	0.870493	0	1	15676.4	SEMA4G
21128	cg21165909	0.754318	-46.1697	46.1697	2.41562e-05	-0.0158217	5690.16	0.77014	0	1	5736.9	CPS1
1730	cg01708964	0.877287	-46.1686	46.1686	2.41626e-05	-0.0107044	12077.8	0.887991	0	1	12144.2	MYL7
5802	cg05807991	0.148726	46.1626	46.1626	2.41956e-05	0.013841	6941.6	0.134885	0	1	7075.88	TRAM1L1
24992	cg25020204	0.773485	-46.1446	46.1446	2.42962e-05	-0.0151345	28346.6	0.788619	0	1	28567.7	DBH
9782	cg09868882	0.6512	-46.1297	46.1297	2.43796e-05	-0.0187384	3053.6	0.669939	0	1	3073.03	GRM8
18808	cg18806980	0.719711	-46.0853	46.0853	2.46306e-05	-0.0169275	3221.37	0.736638	0	1	3246.47	KIAA0703
2727	cg02721374	0.797182	-46.0838	46.0838	2.46388e-05	-0.0142229	6865.51	0.811404	0	1	6847.88	OR1D2
21713	cg21707816	0.622369	-46.0838	46.0838	2.46388e-05	-0.01932	4026.65	0.641689	0	1	4070.66	ENDOGL1
24995	cg25021182	0.843175	-46.0802	46.0802	2.4659e-05	-0.012286	14785.4	0.85546	0	1	14934.9	ELA2B
18491	cg18484189	0.671391	-46.0169	46.0169	2.50211e-05	-0.0182423	6988.07	0.689634	0	1	6976.77	NALP10
9067	cg09120035	0.833951	-45.9702	45.9702	2.52918e-05	-0.0126801	10329.7	0.846632	0	1	10356	CYP11B1
15555	cg15554401	0.86801	-45.9702	45.9702	2.52918e-05	-0.011127	21603.3	0.879137	0	1	21883.8	GJB4
3114	cg03098643	0.125627	45.945	45.945	2.54388e-05	0.0128419	16024.3	0.112785	0	1	15804	FAT
25974	cg25995212	0.78335	-45.9165	45.9165	2.56063e-05	-0.0147305	4827.24	0.798081	0	1	4919.52	SCN7A
12911	cg12970081	0.729506	-45.8071	45.8071	2.62597e-05	-0.0165758	3620.52	0.746081	0	1	3628.75	GPR32
19660	cg19682367	0.630119	-45.8071	45.8071	2.62597e-05	-0.0191165	1781.36	0.649235	0	1	1778.56	FAM79B
4244	cg04216597	0.0675601	45.683	45.683	2.70209e-05	0.0101157	21524.5	0.0574444	0	1	21478.2	CACNA1G
3687	cg03668539	0.846211	-45.6517	45.6517	2.72163e-05	-0.0120984	6895.76	0.85831	0	1	6946.47	PEX11G
14229	cg14256699	0.921056	-45.5941	45.5941	2.758e-05	-0.00841337	13916.9	0.929469	0	1	13955.2	SOST
719	cg00689014	0.692651	-45.5648	45.5648	2.77664e-05	-0.0176122	15925	0.710263	0	1	15840.5	GAST
6065	cg06100324	0.888283	-45.5609	45.5609	2.77912e-05	-0.0100988	24178.9	0.898381	0	1	24312.9	MSLN
4241	cg04211807	0.854827	-45.5097	45.5097	2.81213e-05	-0.0116904	9943.83	0.866518	0	1	10024.3	ZCCHC13
18170	cg18153060	0.769639	-45.4587	45.4587	2.84533e-05	-0.0151684	5239.49	0.784807	0	1	5254.27	KRTHB4
3748	cg03731898	0.695685	-45.4502	45.4502	2.85086e-05	-0.0175085	2624.87	0.713193	0	1	2653.99	CPO
18376	cg18374517	0.69007	-45.441	45.441	2.85691e-05	-0.0176579	8073.49	0.707728	0	1	7896.43	ALPPL2
16872	cg16825000	0.78154	-45.3323	45.3323	2.92937e-05	-0.0147127	12655.9	0.796252	0	1	12667.1	PLA2G2E
17672	cg17667972	0.818718	-45.3323	45.3323	2.92937e-05	-0.0132463	7582.45	0.831964	0	1	7602.36	KRT4
13194	cg13274254	0.0943065	45.2992	45.2992	2.95174e-05	0.0113599	10609.5	0.0829466	0	1	10740.7	GULP1
27005	cg27050793	0.846828	-45.2931	45.2931	2.95591e-05	-0.0120261	12565.5	0.858854	0	1	12532.9	SBSN
20695	cg20748065	0.367987	45.2675	45.2675	2.97336e-05	0.0197325	17155.4	0.348255	0	1	17367.9	POR
14632	cg14633704	0.870868	-45.2356	45.2356	2.9953e-05	-0.0109096	10362.7	0.881777	0	1	10561.2	HSD17B3
11317	cg11384427	0.579401	-45.1925	45.1925	3.02517e-05	-0.0198344	7857.8	0.599236	0	1	7908.9	TNFRSF7
19854	cg19863405	0.831456	-45.1762	45.1762	3.03653e-05	-0.0126855	7109.4	0.844142	0	1	7096.97	ACTL7B
3826	cg03801286	0.461389	45.1711	45.1711	3.04008e-05	0.0205424	12400.5	0.440846	0	1	12594.6	KCNE1
22925	cg22967016	0.0910565	45.1513	45.1513	3.054e-05	0.01119	11541.7	0.0798665	0	1	11535.1	MICAL2
26604	cg26644395	0.667493	-45.1329	45.1329	3.067e-05	-0.0181704	3838.99	0.685664	0	1	3847.47	UCN3
12820	cg12870705	0.0910077	45.0466	45.0466	3.1285e-05	0.0111761	7239.48	0.0798316	0	1	7250.18	NRP1
8107	cg08141989	0.827228	-45.0401	45.0401	3.13324e-05	-0.0128477	23910.9	0.840076	0	1	23868.2	ASGR1
11840	cg11884243	0.849708	-45.0328	45.0328	3.13851e-05	-0.0118636	15960.8	0.861572	0	1	16062.7	FCN2
23144	cg23174481	0.813932	-45.031	45.031	3.13977e-05	-0.0133996	5896.29	0.827331	0	1	5950.09	FLJ35784
11090	cg11170796	0.757311	-45.023	45.023	3.14557e-05	-0.0155296	7405.95	0.772841	0	1	7361.02	TCF3
25473	cg25477904	0.806157	-45.0191	45.0191	3.1484e-05	-0.0137116	8293.62	0.819869	0	1	8397.03	PSG1
23500	cg23540651	0.796649	-44.9388	44.9388	3.20713e-05	-0.0140758	4141.56	0.810725	0	1	4169.37	GBP3
10915	cg11003133	0.692448	-44.7942	44.7942	3.31574e-05	-0.0174761	5425.42	0.709924	0	1	5521.83	AIM2
22715	cg22762309	0.756174	-44.6844	44.6844	3.40067e-05	-0.0155176	6840.77	0.771691	0	1	6975.39	OTUD6A
25787	cg25813714	0.85837	-44.6651	44.6651	3.41578e-05	-0.0114276	13178.6	0.869798	0	1	13107.9	CYP4F12
18471	cg18462653	0.719534	-44.5845	44.5845	3.47975e-05	-0.0166738	9143.5	0.736207	0	1	9262.61	DEFB119
26808	cg26832142	0.0779865	44.5757	44.5757	3.48685e-05	0.010508	20910.1	0.0674785	0	1	20795.3	PDE4B
11444	cg11504740	0.855988	-44.5736	44.5736	3.48853e-05	-0.011525	22233.2	0.867513	0	1	22292.2	GPR152
19413	cg19420968	0.898079	-44.5736	44.5736	3.48853e-05	-0.00950956	13738.7	0.907589	0	1	13744.4	HCRTR1
14333	cg14345882	0.243863	44.557	44.557	3.50183e-05	0.0168914	6883.94	0.226971	0	1	6945.23	BTN3A2
11856	cg11898695	0.689024	-44.5549	44.5549	3.5036e-05	-0.0175223	7974.35	0.706546	0	1	8032.94	PTCRA
20819	cg20862496	0.878469	-44.5058	44.5058	3.54338e-05	-0.0104656	15474.2	0.888935	0	1	15389.5	SLURP1
15514	cg15518883	0.586716	-44.4186	44.4186	3.61526e-05	-0.0195729	26769.5	0.606289	0	1	27204.8	SIT1
6677	cg06682185	0.78787	-44.3422	44.3422	3.67946e-05	-0.0143257	7832.83	0.802196	0	1	7864.03	SERPINB5
10252	cg10322876	0.804842	-44.3422	44.3422	3.67946e-05	-0.01367	9853.1	0.818512	0	1	9843.74	CYP2B6
14690	cg14694011	0.769398	-44.3422	44.3422	3.67946e-05	-0.0150011	6074.8	0.784399	0	1	6104.1	CYP19A1
22791	cg22826936	0.0655248	44.3357	44.3357	3.68491e-05	0.00987551	15444.1	0.0556493	0	1	15436	ULK2
15728	cg15700197	0.607681	-44.2665	44.2665	3.74413e-05	-0.0192167	2021.8	0.626898	0	1	2016.05	OR10J1
16262	cg16194715	0.81949	-44.1675	44.1675	3.83046e-05	-0.0130553	10984.2	0.832546	0	1	11075.3	SMAD9
12780	cg12832649	0.0805284	44.1262	44.1262	3.86706e-05	0.0105795	24599.3	0.0699489	0	1	24293.5	SPOCK
26977	cg27022827	0.663329	-44.1262	44.1262	3.86706e-05	-0.0180795	34837.8	0.681408	0	1	35074.7	TJP3
17440	cg17412258	0.0922076	44.0586	44.0586	3.92771e-05	0.0111185	6445.86	0.0810891	0	1	6586.33	DLK1
12759	cg12811135	0.856763	-44.0333	44.0333	3.95064e-05	-0.0114257	8268.8	0.868189	0	1	8388.44	FLJ25369
16840	cg16792160	0.752351	-44.031	44.031	3.95272e-05	-0.0155397	5742.48	0.767891	0	1	5795.26	ASAH2
415	cg00407150	0.742437	-43.9953	43.9953	3.98536e-05	-0.0158597	18327.2	0.758297	0	1	18428.1	GUP1
13384	cg13447818	0.768138	-43.9918	43.9918	3.98864e-05	-0.0149905	5926.57	0.783128	0	1	6028.13	FLG
7787	cg07826255	0.624366	-43.9487	43.9487	4.02839e-05	-0.0188573	4416.8	0.643223	0	1	4449.14	SGCA
13582	cg13641903	0.511677	43.9487	43.9487	4.02839e-05	0.0202873	19317.9	0.491389	0	1	19436.3	WT1
17806	cg17784922	0.791239	-43.8804	43.8804	4.09219e-05	-0.0141293	6238.35	0.805368	0	1	6315.44	KEL
4497	cg04460372	0.212849	43.8426	43.8426	4.12802e-05	0.0158185	15448.7	0.19703	0	1	15664.8	ST6GALNAC6
3245	cg03221914	0.617416	-43.8385	43.8385	4.1319e-05	-0.0189613	15180.4	0.636377	0	1	15358.2	HIST1H2AJ
9074	cg09133026	0.818658	-43.8385	43.8385	4.1319e-05	-0.0130419	12781.7	0.8317	0	1	12762	RPS6KL1
25327	cg25345738	0.346435	-43.8385	43.8385	4.1319e-05	-0.0194046	3340.3	0.36584	0	1	3396.33	PWP1
25055	cg25076881	0.576701	-43.7845	43.7845	4.1836e-05	-0.0195749	9468.87	0.596276	0	1	9508.3	OR10J1
2927	cg02921257	0.733389	-43.7679	43.7679	4.19964e-05	-0.016106	11150	0.749495	0	1	11179.8	CMYA1
9548	cg09607232	0.794876	-43.7679	43.7679	4.19964e-05	-0.0139722	3572.32	0.808848	0	1	3602.3	MAGEA9
18083	cg18081104	0.593117	-43.7428	43.7428	4.22398e-05	-0.0193361	4713.5	0.612453	0	1	4684.8	THEM5
15702	cg15677294	0.687783	-43.7254	43.7254	4.24088e-05	-0.0173994	16075	0.705183	0	1	16082.6	TUBB4
21576	cg21589115	0.145331	43.6444	43.6444	4.3208e-05	0.0133473	20318	0.131984	0	1	20142	DKKL1
12286	cg12370791	0.0520969	43.6409	43.6409	4.32424e-05	0.00913611	21433.4	0.0429608	0	1	21394.8	HOXB9
23517	cg23566335	0.775533	-43.6409	43.6409	4.32424e-05	-0.0146692	24657.2	0.790202	0	1	24757.2	ADAM18
22265	cg22290566	0.85868	-43.64	43.64	4.32515e-05	-0.0112883	23034.7	0.869968	0	1	22991.1	LMAN1L
11429	cg11492040	0.930207	-43.6112	43.6112	4.35397e-05	-0.00775665	16515	0.937964	0	1	16522.4	H19
3418	cg03391568	0.724579	-43.5832	43.5832	4.38205e-05	-0.0163419	17858.9	0.740921	0	1	17934.1	PTHR1
7085	cg07084746	0.743536	-43.5387	43.5387	4.42725e-05	-0.0157433	3585.48	0.759279	0	1	3556.71	C3orf27
3092	cg03075662	0.729447	-43.527	43.527	4.43913e-05	-0.016184	2905.7	0.745631	0	1	2977.05	PLSCR2
9241	cg09299388	0.803169	-43.4049	43.4049	4.56575e-05	-0.0135988	6573.99	0.816768	0	1	6671.72	PGK2
10248	cg10321196	0.636211	-43.389	43.389	4.5825e-05	-0.018514	9270.98	0.654725	0	1	9353.09	SLC25A5
23384	cg23414387	0.709611	-43.389	43.389	4.5825e-05	-0.0167454	4616.84	0.726357	0	1	4651.99	CYP4B1
16837	cg16790239	0.106045	43.3853	43.3853	4.58637e-05	0.0116585	6803.07	0.0943866	0	1	6868.22	MC1R
20018	cg20034100	0.712229	-43.3334	43.3334	4.64152e-05	-0.0166605	2968.81	0.72889	0	1	3013.13	IBRDC1
22354	cg22386774	0.753551	-43.2645	43.2645	4.71575e-05	-0.0153694	4586.34	0.768921	0	1	4638.89	CRYGA
25157	cg25162301	0.864131	-43.2645	43.2645	4.71575e-05	-0.0109957	12787	0.875127	0	1	12913.9	AHSG
970	cg00936626	0.477056	-43.2545	43.2545	4.72662e-05	-0.0201587	16824.7	0.497215	0	1	16812.9	PIGZ
826	cg00806490	0.142135	43.2315	43.2315	4.7517e-05	0.0131591	21083.1	0.128976	0	1	20761.1	CDH13
17919	cg17894008	0.888957	-43.207	43.207	4.77856e-05	-0.00981838	11961.5	0.898775	0	1	11994	NACAL
10399	cg10486998	0.122105	43.1778	43.1778	4.81085e-05	0.0123263	10234	0.109778	0	1	10213.3	GALR1
23567	cg23617760	0.729772	-43.1397	43.1397	4.85324e-05	-0.0161066	11311.4	0.745879	0	1	11207.7	C16orf44
16202	cg16128363	0.852972	-43.1251	43.1251	4.86955e-05	-0.0114813	8327.67	0.864453	0	1	8309.2	DLGAP1
9860	cg09935228	0.844162	-43.0515	43.0515	4.95279e-05	-0.0118598	5214.15	0.856022	0	1	5215.16
25751	cg25771201	0.845386	-43.0268	43.0268	4.98109e-05	-0.0118033	18544.7	0.857189	0	1	18648.6	SCDR10
1462	cg01446393	0.637018	-43.0068	43.0068	5.00403e-05	-0.0184205	2213.49	0.655439	0	1	2207.06	FAM107A
22242	cg22268164	0.711334	-42.9892	42.9892	5.02435e-05	-0.0166231	4875.27	0.727957	0	1	4910.56	TRHR
20810	cg20856834	0.691951	-42.9725	42.9725	5.04367e-05	-0.0171485	5622.7	0.7091	0	1	5664.49	OR12D3
23228	cg23254045	0.638916	-42.7866	42.7866	5.2643e-05	-0.0183413	2364.45	0.657257	0	1	2389.58	TMCO5
14411	cg14419187	0.113279	42.7766	42.7766	5.27639e-05	0.0118986	7705.91	0.10138	0	1	7626.84	C2orf21
11164	cg11235426	0.31813	42.7691	42.7691	5.28558e-05	0.0183624	13064.2	0.299768	0	1	12755.2	DUSP22
2079	cg02049180	0.680691	-42.7165	42.7165	5.35e-05	-0.0173901	5467.86	0.698082	0	1	5491.77	INSRR
11073	cg11158374	0.78405	-42.6818	42.6818	5.39282e-05	-0.0142122	10100.6	0.798263	0	1	10034.8	TFF2
23654	cg23695504	0.101251	42.6687	42.6687	5.4092e-05	0.0113584	26472.8	0.0898928	0	1	26057	FLJ45717
10346	cg10431340	0.638619	-42.6547	42.6547	5.42659e-05	-0.0183193	2779.89	0.656939	0	1	2804	MPZ
2042	cg02008416	0.659238	-42.65	42.65	5.43245e-05	-0.0178816	6118.61	0.67712	0	1	6091.97	TMEM61
300	cg00280894	0.6752	-42.6244	42.6244	5.46463e-05	-0.0175048	6795.26	0.692704	0	1	6811.65	NXF2
13764	cg13812587	0.0715604	42.6244	42.6244	5.46463e-05	0.00998543	16847.1	0.061575	0	1	16903.7	TMEM15
23597	cg23645091	0.739614	-42.5873	42.5873	5.51155e-05	-0.015706	7239.78	0.75532	0	1	7289.67	KRT5
231	cg00213044	0.795251	-42.523	42.523	5.59372e-05	-0.0137711	32856.7	0.809022	0	1	32934.1	KRT6C
24559	cg24607398	0.594534	-42.5195	42.5195	5.59818e-05	-0.0190575	4138.82	0.613592	0	1	4176.72	MLH1
24	cg00022866	0.397928	-42.5135	42.5135	5.60601e-05	-0.0197044	30309	0.417633	0	1	30611.2	FLJ37970
351	cg00333528	0.301829	42.5135	42.5135	5.60601e-05	0.0179688	8103.32	0.28386	0	1	8088.26	GABRR1
2617	cg02614818	0.831669	-42.5135	42.5135	5.60601e-05	-0.0123201	8307.11	0.843989	0	1	8376.54	ABCC6
15774	cg15746445	0.681706	-42.5135	42.5135	5.60601e-05	-0.0173211	7418.44	0.699027	0	1	7423.48	TRPM8
26821	cg26845300	0.0948284	42.5135	42.5135	5.60601e-05	0.0110499	21698.1	0.0837785	0	1	21705.7	SNX9
25651	cg25665697	0.707497	-42.4938	42.4938	5.63143e-05	-0.0166379	8795.44	0.724135	0	1	8677.82	LCTL
12100	cg12150401	0.689693	-42.4486	42.4486	5.69032e-05	-0.0171066	4397.58	0.7068	0	1	4454.8	TAS2R16
22082	cg22117143	0.798883	-42.4431	42.4431	5.69757e-05	-0.0136179	4863.11	0.812501	0	1	4909.81	MPDZ
18788	cg18787783	0.717368	-42.4355	42.4355	5.70759e-05	-0.0163468	4884.48	0.733715	0	1	4912.11	MMP19
728	cg00695416	0.0574492	-42.4284	42.4284	5.71696e-05	-0.00975288	18899.5	0.0672021	0	1	19157.8	CBR1
13927	cg13968061	0.758811	-42.4197	42.4197	5.72834e-05	-0.0150486	4840.21	0.77386	0	1	4835.82	APCS
26656	cg26692016	0.728364	-42.4038	42.4038	5.74934e-05	-0.0160154	2921.71	0.744379	0	1	2961.84	APOBEC1
15329	cg15329483	0.70933	-42.4022	42.4022	5.75151e-05	-0.0165674	4459.02	0.725897	0	1	4440	SSX7
9253	cg09307264	0.611028	-42.3819	42.3819	5.77846e-05	-0.018761	18272.7	0.629789	0	1	18407.2	INCA1
13018	cg13097816	0.845767	-42.3661	42.3661	5.79955e-05	-0.0116977	16143.6	0.857465	0	1	16090.9	GPR35
16154	cg16072462	0.375557	-42.322	42.322	5.85864e-05	-0.0194421	18777.8	0.395	0	1	19134.3	PF4
6084	cg06123346	0.653917	-42.2991	42.2991	5.88959e-05	-0.0179215	7884.16	0.671838	0	1	7835.44	ATP4A
18696	cg18692273	0.884301	-42.099	42.099	6.16733e-05	-0.00992143	10711.7	0.894223	0	1	10802.4	TNNT2
10520	cg10602543	0.776248	-42.0964	42.0964	6.17102e-05	-0.0143962	29262.6	0.790644	0	1	28887.2	H19
18817	cg18815943	0.0562191	42.0855	42.0855	6.18654e-05	0.00918454	20502.9	0.0470346	0	1	20503	FOXE3
4673	cg04618528	0.872858	-42.0647	42.0647	6.21633e-05	-0.0104519	14372.1	0.88331	0	1	14487.5	KRTHA6
13382	cg13446622	0.796068	-42.0509	42.0509	6.23611e-05	-0.0136647	9834.04	0.809733	0	1	9838.14	SDR-O
5814	cg05823029	0.787924	-42.0408	42.0408	6.25062e-05	-0.0139648	28850.9	0.801889	0	1	28739.1	ATP4B
20377	cg20406878	0.708329	-42.0408	42.0408	6.25062e-05	-0.0165298	2310.02	0.724859	0	1	2357.19	NR5A2
24653	cg24690731	0.162382	41.9829	41.9829	6.33442e-05	0.0137548	10445.3	0.148627	0	1	10564.7	SOX7
8748	cg08794763	0.722524	-41.9816	41.9816	6.33639e-05	-0.0161138	19680.8	0.738638	0	1	19709.5	TLE6
26396	cg26414720	0.804362	-41.95	41.95	6.38262e-05	-0.0133333	4816.95	0.817695	0	1	4885.15	MAGEA1
13963	cg14001035	0.717267	-41.9358	41.9358	6.40352e-05	-0.0162577	3115.16	0.733525	0	1	3183.86	ATP10A
10611	cg10707565	0.69684	-41.8264	41.8264	6.56689e-05	-0.016802	2401.02	0.713642	0	1	2422.05	CUBN
12555	cg12616487	0.711502	-41.7657	41.7657	6.65934e-05	-0.0163927	26320	0.727894	0	1	26825.5	EML3
11204	cg11267879	0.735923	-41.7651	41.7651	6.66032e-05	-0.0156742	3941.96	0.751597	0	1	3947.92	CYP2F1
26301	cg26312920	0.669079	-41.753	41.753	6.67887e-05	-0.0174759	3098.36	0.686555	0	1	3154.55	NEUROD6
4492	cg04457794	0.77994	-41.681	41.681	6.79039e-05	-0.0141989	6117.19	0.794138	0	1	6152.14	CTSE
21378	cg21402035	0.829413	-41.6651	41.6651	6.81544e-05	-0.0122967	28121.3	0.84171	0	1	28041.7	GALR3
25909	cg25934198	0.836571	-41.6602	41.6602	6.82312e-05	-0.0119985	8570.24	0.84857	0	1	8727.35	FLJ36268
25824	cg25843439	0.465181	-41.6294	41.6294	6.87168e-05	-0.0197952	10948.6	0.484976	0	1	11035.2	OR10H3
23043	cg23081213	0.70782	-41.5546	41.5546	6.991e-05	-0.0164561	15684.2	0.724276	0	1	15925	PRKAG3
5815	cg05824215	0.621725	-41.5398	41.5398	7.01484e-05	-0.0184041	4209.28	0.640129	0	1	4235.88	CCR6
26891	cg26922202	0.642986	-41.5224	41.5224	7.04299e-05	-0.0179966	5501	0.660983	0	1	5537.03	OR2S2
16656	cg16592658	0.593383	-41.469	41.469	7.13012e-05	-0.0188471	13447.9	0.61223	0	1	13617.4	EBI3
27317	cg27380758	0.441592	-41.3876	41.3876	7.26502e-05	-0.0197028	15784.4	0.461295	0	1	16061.8	SORBS3
2902	cg02905245	0.528973	-41.3845	41.3845	7.27019e-05	-0.0195257	7085.65	0.548499	0	1	7202.62	URB
18570	cg18564727	0.643744	-41.3519	41.3519	7.32501e-05	-0.0179479	2308.64	0.661692	0	1	2331.19	PLP1
328	cg00311768	0.835368	-41.3077	41.3077	7.40006e-05	-0.0120028	7943.95	0.84737	0	1	7953.65	TSTA3
10289	cg10364182	0.150023	41.2775	41.2775	7.45159e-05	0.0131833	4774.24	0.13684	0	1	4853.48	LOC119710
17313	cg17277939	0.865469	-41.2707	41.2707	7.4633e-05	-0.0106955	7310.7	0.876164	0	1	7446.57	MGC13168
17524	cg17500962	0.710092	-41.2112	41.2112	7.56631e-05	-0.0163308	3503.79	0.726423	0	1	3535.13	C16orf47
15662	cg15642035	0.726502	-41.211	41.211	7.56652e-05	-0.0158609	3098.65	0.742363	0	1	3117.59	C8ORFK32
2126	cg02100848	0.835193	-41.177	41.177	7.62606e-05	-0.0119922	27245.2	0.847185	0	1	27051.1	C3orf32
5278	cg05256043	0.75108	-41.1765	41.1765	7.62695e-05	-0.0150954	6458.53	0.766175	0	1	6526.08	DCT
16892	cg16853982	0.222617	-41.1718	41.1718	7.63518e-05	-0.0161276	10901.6	0.238744	0	1	10631.3	ACTN2
8365	cg08418111	0.470535	41.1379	41.1379	7.69494e-05	0.019668	6060.76	0.450867	0	1	6127.73	LDHC
3242	cg03221619	0.667004	-41.1196	41.1196	7.72745e-05	-0.017399	10863.3	0.684403	0	1	10730.3	FCER2
7600	cg07637239	0.631049	-41.1125	41.1125	7.74025e-05	-0.0181441	8124	0.649193	0	1	8166.03	KCNK18
4811	cg04749372	0.837693	-41.0796	41.0796	7.79907e-05	-0.0118736	27735.8	0.849567	0	1	27975.8	INMT
3149	cg03128832	0.688942	-41.0707	41.0707	7.81498e-05	-0.0168613	2946.32	0.705803	0	1	3003.77	APOL5
22897	cg22937320	0.886061	-41.0555	41.0555	7.84244e-05	-0.00972271	20859	0.895784	0	1	21112.4	C9orf138
5363	cg05358291	0.701115	-41.0053	41.0053	7.93358e-05	-0.0165327	3838.46	0.717648	0	1	3845.86	CYP4F2
15807	cg15765694	0.690674	-41.0053	41.0053	7.93358e-05	-0.0168045	3790.14	0.707479	0	1	3826.67	PPP3R2
2847	cg02847216	0.859041	-40.9709	40.9709	7.99663e-05	-0.0109427	18819.9	0.869984	0	1	18816.4	CTAGE1
25243	cg25249068	0.706579	-40.9709	40.9709	7.99663e-05	-0.0163794	18388.6	0.722958	0	1	18391.8	BFSP2
8427	cg08475088	0.883388	-40.9201	40.9201	8.09081e-05	-0.0098328	18963.7	0.893221	0	1	19170.4	NALP9
25862	cg25889160	0.802412	-40.8927	40.8927	8.14196e-05	-0.0132498	5966.77	0.815662	0	1	6041.3	SERPINA5
7972	cg08007665	0.744888	-40.8838	40.8838	8.15868e-05	-0.0152397	8278.2	0.760128	0	1	8175.69	KCNQ1
7632	cg07664183	0.0923682	40.8831	40.8831	8.16002e-05	0.0107391	9904.07	0.0816291	0	1	9981.19	FAM29A
21935	cg21961766	0.8072	-40.8745	40.8745	8.17612e-05	-0.0130636	4377.23	0.820264	0	1	4471.07	PRRG2
20634	cg20676475	0.756829	-40.8595	40.8595	8.20438e-05	-0.014851	5014.59	0.77168	0	1	5046.78	LCE3D
16209	cg16140179	0.679898	-40.8338	40.8338	8.25306e-05	-0.0170364	5055.33	0.696934	0	1	5078.7	NURIT
7579	cg07611925	0.807559	-40.807	40.807	8.30434e-05	-0.0130392	4022.93	0.820598	0	1	4018.81	KCNE2
13295	cg13359415	0.0534241	40.807	40.807	8.30434e-05	0.00891639	18746.1	0.0445078	0	1	18723.3	LGI2
6133	cg06179485	0.201341	40.7947	40.7947	8.32774e-05	0.0149173	9286.58	0.186424	0	1	9369.14	TMEM54
20275	cg20312687	0.736378	-40.7947	40.7947	8.32774e-05	-0.0154845	4710.78	0.751862	0	1	4801.65	DEFB118
17153	cg17124700	0.761865	-40.7914	40.7914	8.33416e-05	-0.0146712	4105.22	0.776536	0	1	4195.94	RGS8
13676	cg13735697	0.872721	-40.7652	40.7652	8.38457e-05	-0.0103036	19986.2	0.883025	0	1	20053.4	MYOG
6003	cg06025017	0.764016	-40.7398	40.7398	8.43381e-05	-0.0145906	4319.98	0.778606	0	1	4432.16	RGSL2
10253	cg10324224	0.563669	-40.739	40.739	8.43533e-05	-0.0190594	5680.59	0.582728	0	1	5697.79	TTC13
5236	cg05215575	0.702021	-40.7349	40.7349	8.44318e-05	-0.016452	11972.9	0.718473	0	1	11995.7	FLJ25410
10678	cg10779183	0.736474	-40.7042	40.7042	8.50323e-05	-0.0154638	12721.7	0.751938	0	1	12856.1	ELA3A
2992	cg02982734	0.761799	-40.6729	40.6729	8.56466e-05	-0.0146523	12002.9	0.776452	0	1	12072.7	MAGEL2
26722	cg26759925	0.72466	-40.6657	40.6657	8.57879e-05	-0.0158082	3399.79	0.740468	0	1	3390.49	IL1F9
5637	cg05649009	0.687266	-40.6515	40.6515	8.60702e-05	-0.0168156	2702.18	0.704082	0	1	2738.5	CHRNA1
17301	cg17266238	0.809014	-40.5822	40.5822	8.74535e-05	-0.0129477	13070.6	0.821961	0	1	13313.2	C21orf94
17321	cg17288121	0.758946	-40.5654	40.5654	8.77926e-05	-0.0147284	4780.82	0.773675	0	1	4774.78	DEFB103A
23984	cg24030609	0.710283	-40.5574	40.5574	8.79557e-05	-0.0161948	3239.84	0.726478	0	1	3200.64	ELA2B
11318	cg11385473	0.130656	40.5269	40.5269	8.8575e-05	0.0123079	4575.86	0.118348	0	1	4681.89	IMMP1L
13606	cg13668129	0.216685	40.5139	40.5139	8.88405e-05	0.0153499	14167.6	0.201335	0	1	14338.8	HNRPUL1
2578	cg02580606	0.789429	-40.5038	40.5038	8.90469e-05	-0.0136648	5552.05	0.803094	0	1	5656.89	KRTHA3B
6973	cg06985415	0.859105	-40.4792	40.4792	8.95528e-05	-0.0108747	20411.2	0.869979	0	1	20513.3	C10orf39
14564	cg14561282	0.713694	-40.4551	40.4551	9.00505e-05	-0.0160806	7256.87	0.729775	0	1	7273.13	ADAM29
21981	cg22013966	0.864446	-40.4349	40.4349	9.04713e-05	-0.0106337	18520.1	0.87508	0	1	18723.5	SERPINA13
7380	cg07404485	0.673437	-40.4184	40.4184	9.08153e-05	-0.0171025	16363.7	0.69054	0	1	16451.9	PON1
3669	cg03649060	0.708871	-40.3571	40.3571	9.21071e-05	-0.0161954	9401.67	0.725067	0	1	9362.81	ELOF1
9871	cg09944526	0.742291	-40.3522	40.3522	9.22102e-05	-0.0152209	2645.83	0.757512	0	1	2690.77	EXOC6
17927	cg17901463	0.200348	-40.3522	40.3522	9.22102e-05	-0.0152882	6685.46	0.215636	0	1	5898.6	GSTM1
12167	cg12237269	0.700405	-40.3388	40.3388	9.24945e-05	-0.0164171	8977.86	0.716822	0	1	9137.58	SLN
6838	cg06836772	0.192464	40.3188	40.3188	9.2923e-05	0.0145407	14840.4	0.177924	0	1	14960.8	PRKAA2
3981	cg03941108	0.707507	-40.2543	40.2543	9.43129e-05	-0.0162116	10930.8	0.723718	0	1	10854.2	C1QB
4316	cg04289385	0.0832195	40.2543	40.2543	9.43129e-05	0.0102496	17643.3	0.0729699	0	1	17622.4	ETV7
208	cg00187380	0.160095	40.2459	40.2459	9.44948e-05	0.0133957	13578.9	0.146699	0	1	13674.7	HOXC5
18947	cg18956481	0.120468	40.2224	40.2224	9.50075e-05	0.0118501	6993.51	0.108618	0	1	6948.78	CYP24A1
2308	cg02274362	0.918016	-40.2063	40.2063	9.53608e-05	-0.0080815	19269.8	0.926098	0	1	19294.3	PNMA6A
4649	cg04592706	0.797887	-40.2035	40.2035	9.54214e-05	-0.0133059	3520.36	0.811193	0	1	3588.86	ABCA4
20990	cg21033494	0.837651	-40.2035	40.2035	9.54214e-05	-0.0117494	7303.56	0.849401	0	1	7273.54	MSMB
760	cg00729275	0.769045	-40.1865	40.1865	9.57957e-05	-0.0143239	6221.7	0.783368	0	1	6248.15	C18orf16
14703	cg14701962	0.809019	-40.1778	40.1778	9.59898e-05	-0.012883	10272.3	0.821902	0	1	10498.1	C1orf111
14242	cg14269477	0.733154	-40.1502	40.1502	9.65995e-05	-0.0154599	26227.2	0.748614	0	1	26337.1	TRPV5
15979	cg15903395	0.760024	-40.1502	40.1502	9.65995e-05	-0.0146174	7674.59	0.774642	0	1	7664.58	FLJ25369
7015	cg07028533	0.081872	40.1484	40.1484	9.66414e-05	0.0101737	14628.3	0.0716983	0	1	14670.9	CNTNAP2
7566	cg07597976	0.634387	-40.1447	40.1447	9.67231e-05	-0.0178651	5942.46	0.652252	0	1	5966.23	CD19
11641	cg11706111	0.830184	-40.1052	40.1052	9.7607e-05	-0.0120394	13005	0.842224	0	1	13120.7	ZNF19
2151	cg02130905	0.727284	-40.0237	40.0237	9.94549e-05	-0.01561	17594.4	0.742894	0	1	17809.3	STMN4
14794	cg14792480	0.413526	-39.9415	39.9415	0.000101357	-0.019226	15357.5	0.432752	0	1	15616.3	CDH16
24509	cg24541550	0.823053	-39.9316	39.9316	0.000101587	-0.0123018	16706.8	0.835355	0	1	16692.5	MRVI1
23696	cg23737768	0.717724	-39.9315	39.9315	0.00010159	-0.0158669	3031.01	0.733591	0	1	3033.61	KRT24
11131	cg11206634	0.690851	-39.9156	39.9156	0.000101962	-0.0165782	7241.46	0.70743	0	1	7262.88	SFT2D3
21942	cg21969640	0.340251	39.9145	39.9145	0.000101988	0.0181534	22248.2	0.322097	0	1	22523	GPR84
1472	cg01454134	0.6714	-39.9114	39.9114	0.00010206	-0.0170435	9614.04	0.688443	0	1	9649.13	GALP
10113	cg10190509	0.786565	-39.9114	39.9114	0.00010206	-0.0136687	5268.91	0.800234	0	1	5348.76	CCL16
25701	cg25720804	0.0896061	39.9114	39.9114	0.00010206	0.0104902	13575.4	0.0791158	0	1	13592.4	TLX3
26298	cg26309498	0.73431	-39.8798	39.8798	0.000102807	-0.0153742	9044.07	0.749685	0	1	9037.45	EDAR
11646	cg11710560	0.851602	-39.8748	39.8748	0.000102925	-0.0111174	10707.6	0.862719	0	1	10818	KRTAP9-3
23459	cg23504246	0.593487	-39.8359	39.8359	0.000103852	-0.0184748	5064.84	0.611962	0	1	5136.72	FGF7
20287	cg20322862	0.41662	-39.8306	39.8306	0.000103977	-0.0192143	22026.5	0.435834	0	1	22408.4	TGIF
8812	cg08849574	0.115724	39.8282	39.8282	0.000104034	0.0115966	9189.44	0.104127	0	1	9265.36	ZNF134
3899	cg03860890	0.114777	39.8123	39.8123	0.000104416	0.0115542	16661.2	0.103223	0	1	16618.8	EGFR
12171	cg12240237	0.671124	-39.8123	39.8123	0.000104416	-0.0170263	4652.37	0.688151	0	1	4682.61	WBSCR23
15181	cg15186584	0.831434	-39.8123	39.8123	0.000104416	-0.0119451	6551.3	0.843379	0	1	6644.11	C9orf24
18932	cg18942631	0.688423	-39.6444	39.6444	0.000108533	-0.0165839	11777.7	0.705007	0	1	11809.2	CASQ2
10811	cg10910525	0.624957	-39.6345	39.6345	0.000108779	-0.0179293	22411.4	0.642886	0	1	21949	HRC
10422	cg10503138	0.657987	-39.6115	39.6115	0.000109358	-0.0172788	4259.67	0.675266	0	1	4326.79	CNTN4
6244	cg06277277	0.849185	-39.6095	39.6095	0.000109409	-0.0111854	7866.27	0.86037	0	1	7829.77	NR1I3
22332	cg22373097	0.689032	-39.4797	39.4797	0.000112729	-0.016538	3440.15	0.70557	0	1	3495.6	KRTAP21-1
8448	cg08504583	0.636677	39.479	39.479	0.000112745	0.0180055	8127.07	0.618671	0	1	8228.3	FLJ30046
27439	cg27508002	0.838157	-39.479	39.479	0.000112745	-0.011628	9803.37	0.849785	0	1	9870.95	SMAD9
25444	cg25455753	0.86145	-39.4257	39.4257	0.000114138	-0.0106373	10371.5	0.872087	0	1	10447.8	C15orf32
922	cg00895324	0.639014	-39.4063	39.4063	0.000114649	-0.0176225	5431.22	0.656637	0	1	5502.19	PCP4
14305	cg14321743	0.770714	-39.3784	39.3784	0.000115389	-0.0141311	9193.73	0.784845	0	1	9314.86	PLA2G2D
1028	cg00995152	0.736199	-39.357	39.357	0.000115959	-0.0152244	6444.12	0.751423	0	1	6468.82	DAB2IP
15865	cg15802898	0.0929781	39.3361	39.3361	0.000116516	0.0105679	17771.3	0.0824101	0	1	17806.8	FOXE1
20323	cg20356482	0.870886	-39.3342	39.3342	0.000116568	-0.0102106	12162.1	0.881097	0	1	12242.5	FBP2
10158	cg10235741	0.806875	-39.3173	39.3173	0.000117022	-0.0128327	5909.56	0.819708	0	1	5979.64	DNASE1L3
8461	cg08521225	0.80377	-39.3068	39.3068	0.000117307	-0.0129468	4591.4	0.816717	0	1	4626.02	TTR
7907	cg07944811	0.870513	-39.2942	39.2942	0.000117645	-0.0102214	10630.5	0.880734	0	1	10598.2	GCK
20241	cg20281815	0.909541	-39.2942	39.2942	0.000117645	-0.00840837	14021.4	0.91795	0	1	14036.9	PSCA
471	cg00462994	0.0771162	39.2278	39.2278	0.00011946	0.00984964	22459.2	0.0672665	0	1	22498.8	NAGS
13794	cg13842648	0.590812	-39.2278	39.2278	0.00011946	-0.0183786	10069.3	0.609191	0	1	10171.8	IL9
8622	cg08678755	0.634633	-39.2247	39.2247	0.000119544	-0.0176645	3879.05	0.652298	0	1	3921.1	ENPP3
2707	cg02706575	0.647508	-39.1647	39.1647	0.000121208	-0.017403	2584.31	0.664911	0	1	2558.72	CCL13
3722	cg03705396	0.140418	39.1497	39.1497	0.000121628	0.0124853	22324.3	0.127933	0	1	22180	MAP6D1
18769	cg18766847	0.726472	-39.1327	39.1327	0.000122105	-0.0154666	3165.74	0.741939	0	1	3244.6	ACMSD
10463	cg10539507	0.111927	39.1157	39.1157	0.000122584	0.0113432	7827.5	0.100584	0	1	7798.65	NKX6-1
24145	cg24200059	0.140217	39.0552	39.0552	0.000124303	0.0124639	18880.2	0.127754	0	1	18858.8	FLJ22222
26167	cg26185508	0.714019	-39.0489	39.0489	0.000124483	-0.0158006	3757.82	0.729819	0	1	3750.75	CDCP2
12764	cg12815142	0.755297	-39.0074	39.0074	0.000125677	-0.0145712	5612.9	0.769868	0	1	5677.52	SPAG7
7242	cg07265310	0.63559	-38.9941	38.9941	0.000126064	-0.0175976	34064.6	0.653188	0	1	34381.5	K5B
8468	cg08527127	0.62081	-38.9941	38.9941	0.000126064	-0.0178628	8696.25	0.638673	0	1	8743.09	C1orf94
4600	cg04551925	0.834411	-38.9909	38.9909	0.000126156	-0.0117107	10254	0.846122	0	1	10278	AQP1
20617	cg20661303	0.708066	-38.9796	38.9796	0.000126486	-0.0159469	23388.7	0.724013	0	1	23478.4	LEFTY2
13712	cg13765785	0.165706	38.9681	38.9681	0.000126819	0.013391	28099.6	0.152315	0	1	27801.3	SCN3B
10832	cg10923408	0.52657	-38.9308	38.9308	0.000127913	-0.0189645	16527.2	0.545534	0	1	16717.6	MGC40178
22975	cg23013864	0.608556	-38.887	38.887	0.00012921	-0.0180398	4579.03	0.626596	0	1	4626.27	CAP2
21641	cg21643191	0.710033	-38.8505	38.8505	0.000130303	-0.0158701	2480.71	0.725903	0	1	2511.01	ABCB5
13632	cg13688966	0.671279	-38.7831	38.7831	0.000132339	-0.0168166	3710.92	0.688095	0	1	3770.86	TM4SF4
26693	cg26738010	0.887888	-38.7508	38.7508	0.000133328	-0.0093739	18654.5	0.897262	0	1	18860.9	CETN1
2188	cg02164442	0.763991	-38.6787	38.6787	0.00013556	-0.0142349	18729.8	0.778226	0	1	18923.5	ITGAD
3462	cg03440846	0.764732	-38.6236	38.6236	0.00013729	-0.0142013	9593.4	0.778934	0	1	9659.95	ACSS2
4079	cg04030848	0.649063	-38.6236	38.6236	0.00013729	-0.0172605	11135.9	0.666324	0	1	11293.9	GAL3ST1
27103	cg27160701	0.763595	-38.5909	38.5909	0.00013833	-0.014233	3806.18	0.777828	0	1	3841.22	SBEM
6753	cg06765947	0.850534	-38.5789	38.5789	0.000138712	-0.0109935	13994.7	0.861527	0	1	14105.5	UROC1
4823	cg04761824	0.827105	-38.5536	38.5536	0.00013952	-0.0119418	5509.97	0.839047	0	1	5595.77	2020-12-01
15799	cg15759873	0.707301	-38.55	38.55	0.000139638	-0.0158869	2832.45	0.723188	0	1	2845.1	ATP6V1E2
13048	cg13133883	0.497098	-38.4958	38.4958	0.000141389	-0.0190118	15939.7	0.51611	0	1	16143.6	RGR
8858	cg08901867	0.746896	-38.4717	38.4717	0.000142177	-0.0147405	3942.13	0.761636	0	1	4000.03	TTLL6
13635	cg13693652	0.701917	-38.4383	38.4383	0.000143274	-0.016007	4263.1	0.717924	0	1	4301.81	CLCA2
8290	cg08343834	0.62345	-38.3935	38.3935	0.00014476	-0.0176905	4131.38	0.641141	0	1	4151.88	PMP22
7535	cg07566050	0.78766	-38.3525	38.3525	0.000146134	-0.0133799	7808.56	0.80104	0	1	7808.94	PEA15
551	cg00532335	0.606883	-38.3306	38.3306	0.000146871	-0.017948	8563.22	0.624831	0	1	8719.37	LGI1
4321	cg04297093	0.822778	-38.3282	38.3282	0.000146953	-0.0120785	7121.48	0.834857	0	1	7213.66	KRTAP19-3
1695	cg01668126	0.790038	-38.3088	38.3088	0.000147612	-0.0132884	6491.15	0.803326	0	1	6608.1	MSR1
27527	cg27603796	0.105205	38.3065	38.3065	0.000147691	0.0109565	15669	0.0942481	0	1	15738.6	CTTNBP2
23761	cg23813257	0.461171	-38.2983	38.2983	0.000147967	-0.0190083	34634.4	0.480179	0	1	35122.6	IL32
22026	cg22059008	0.769626	-38.2508	38.2508	0.000149597	-0.0139764	16191	0.783602	0	1	16280.4	TESSP1
27037	cg27081230	0.545327	-38.23	38.23	0.000150316	-0.0186639	5394.02	0.563991	0	1	5449.98	SLIC1
22608	cg22638542	0.833741	-38.2082	38.2082	0.000151069	-0.0116293	10344.1	0.845371	0	1	10443.5	SEC22L3
14819	cg14820573	0.865795	-38.1226	38.1226	0.000154078	-0.010286	10347.4	0.876081	0	1	10435.5	C16orf33
3762	cg03741352	0.785459	-38.0512	38.0512	0.000156632	-0.0134085	21909.1	0.798868	0	1	21902.1	LCE3C
20518	cg20576002	0.797014	-38.0342	38.0342	0.000157248	-0.0129975	15391.8	0.810012	0	1	15390	FAM112B
17564	cg17542495	0.712494	-38.0112	38.0112	0.000158082	-0.0156474	25433.6	0.728141	0	1	25580.8	GJB1
15602	cg15589427	0.832611	-37.9963	37.9963	0.000158625	-0.0116457	17347.2	0.844257	0	1	17398.5	MUC4
7192	cg07207789	0.612328	-37.9788	37.9788	0.000159266	-0.0177858	9208.18	0.630114	0	1	9205.8	CRISPLD2
26361	cg26379475	0.686899	-37.9625	37.9625	0.000159864	-0.016289	3264.32	0.703188	0	1	3250.91	SH2D1B
23295	cg23322523	0.655142	-37.9435	37.9435	0.000160566	-0.0169947	2607.93	0.672137	0	1	2604.26	TRIM55
5228	cg05206587	0.519216	-37.9081	37.9081	0.000161878	-0.0187776	2711.92	0.537993	0	1	2731.98	GLRA2
10212	cg10287137	0.542106	37.8805	37.8805	0.000162911	0.0187468	20588.3	0.523359	0	1	20710.1	P2RY2
15403	cg15408454	0.883176	-37.8692	37.8692	0.000163336	-0.00948894	13446.9	0.892664	0	1	13407.1	MAGEA6
14696	cg14696820	0.580596	-37.8576	37.8576	0.000163773	-0.0182087	12598.3	0.598804	0	1	12784.6	LCE1A
22258	cg22285621	0.310652	37.8358	37.8358	0.000164597	0.0171728	29672.8	0.29348	0	1	29874.5	SSH3
22337	cg22375610	0.628212	-37.7909	37.7909	0.000166307	-0.0174776	9918.04	0.645689	0	1	9930.64	APOBEC2
6324	cg06351503	0.86024	-37.7821	37.7821	0.000166644	-0.0104808	10449.7	0.870721	0	1	10468	RDBP
18543	cg18530748	0.079511	-37.7666	37.7666	0.000167241	-0.0102316	12502.5	0.0897426	0	1	12626.6	SULT1A1
22399	cg22427279	0.584558	-37.7621	37.7621	0.000167415	-0.0181362	2547.9	0.602694	0	1	2563.27	NHLH2
25468	cg25473396	0.0717157	37.7297	37.7297	0.000168667	0.0094333	21758.1	0.0622824	0	1	21754	MPG
27520	cg27592112	0.830659	-37.6822	37.6822	0.000170524	-0.0116773	5693.63	0.842337	0	1	5768.36	GABRG3
14458	cg14456683	0.175497	37.6585	37.6585	0.000171453	0.0135208	6151.09	0.161976	0	1	6231.46	ZIC1
5793	cg05798712	0.668674	-37.6531	37.6531	0.000171668	-0.0166449	3879.75	0.685319	0	1	3926.09	FABP7
13202	cg13279585	0.673103	-37.6366	37.6366	0.000172323	-0.0165427	3196.99	0.689646	0	1	3268.59
3934	cg03891191	0.725287	-37.5293	37.5293	0.000176633	-0.0152044	10940.1	0.740491	0	1	11120.3	PRAMEF2
26145	cg26159905	0.612976	-37.5206	37.5206	0.000176985	-0.0176749	17365.8	0.630651	0	1	17451.8	ASB10
1750	cg01726767	0.681147	-37.5192	37.5192	0.000177043	-0.0163356	6284.22	0.697482	0	1	6350.74	LALBA
20350	cg20377762	0.847527	-37.5167	37.5167	0.000177145	-0.0109762	5971.19	0.858503	0	1	6066.69	TMEM61
25925	cg25946374	0.850107	-37.5167	37.5167	0.000177145	-0.0108699	25293.1	0.860977	0	1	25293.2	IL22RA1
20506	cg20557104	0.12649	37.5163	37.5163	0.000177161	0.0117069	12908.1	0.114783	0	1	12937.8	B3GALT7
10059	cg10143146	0.291138	37.5113	37.5113	0.000177366	0.0167023	8829.45	0.274436	0	1	8974.41	COL11A2
24335	cg24387380	0.605537	-37.5039	37.5039	0.000177668	-0.0177831	5380.79	0.62332	0	1	5423.5	GABRA5
147	cg00134787	0.735344	-37.4752	37.4752	0.000178848	-0.0149035	3551.11	0.750247	0	1	3598.05	MYH1
8818	cg08860143	0.692533	-37.433	37.433	0.000180593	-0.0160438	4270.89	0.708577	0	1	4286	MYLPF
21196	cg21230133	0.759382	-37.4325	37.4325	0.000180615	-0.0141652	9032.59	0.773547	0	1	9044.92	KRTHA1
23580	cg23629496	0.638477	-37.3823	37.3823	0.000182714	-0.0172005	9194.22	0.655677	0	1	9220.95	C20orf75
2556	cg02552572	0.717167	-37.3258	37.3258	0.000185107	-0.0153871	3606.71	0.732553	0	1	3659.68	MT4
12944	cg13005002	0.677061	-37.3258	37.3258	0.000185107	-0.0163884	3477.04	0.69345	0	1	3447.54	RFPL3
7611	cg07643942	0.665204	-37.2868	37.2868	0.000186775	-0.0166436	3149.58	0.681848	0	1	3114.37	LACRT
26179	cg26198807	0.590866	-37.2779	37.2779	0.000187157	-0.0179429	8121.34	0.608808	0	1	8213.73	C11orf49
6804	cg06813842	0.654131	-37.2729	37.2729	0.000187376	-0.0168716	35049.5	0.671003	0	1	35106.5	STRC
24593	cg24641737	0.134431	37.2672	37.2672	0.000187619	0.0119762	13317.9	0.122455	0	1	13493.9	DENND2D
22795	cg22828602	0.539494	-37.2655	37.2655	0.000187695	-0.0184861	2614.03	0.55798	0	1	2621.32	RNF133
12520	cg12584889	0.74392	-37.2531	37.2531	0.000188229	-0.0146084	6451.67	0.758528	0	1	6465.28	NXF3
22861	cg22899145	0.906904	-37.2531	37.2531	0.000188229	-0.00832736	14883.9	0.915231	0	1	15056.3	OPN1LW
7005	cg07017706	0.778314	-37.2158	37.2158	0.000189855	-0.0135093	14503.3	0.791823	0	1	14550.2	K6IRS3
18992	cg18997129	0.12586	37.1847	37.1847	0.000191218	0.0116328	12657.5	0.114227	0	1	12644	EPHA1
18088	cg18084114	0.766385	-37.1832	37.1832	0.000191286	-0.0138962	4334.71	0.780282	0	1	4343.33	MATN1
12351	cg12432709	0.764297	-37.1783	37.1783	0.000191502	-0.0139619	5218.22	0.778259	0	1	5339.66	CCDC68
12595	cg12650635	0.681036	-37.1783	37.1783	0.000191502	-0.0162631	25590.3	0.697299	0	1	25739.4	AQP2
2835	cg02833180	0.758336	-37.1764	37.1764	0.000191584	-0.0141501	3425.39	0.772486	0	1	3485.11	PLCL1
6992	cg07007400	0.123745	37.1647	37.1647	0.0001921	0.0115454	7357.19	0.1122	0	1	7416.35	KRT7
26372	cg26389232	0.883593	-37.1557	37.1557	0.000192498	-0.00938332	13331.7	0.892976	0	1	13368.8	PWCR1
9971	cg10056627	0.140186	37.1078	37.1078	0.000194635	0.0121672	14751.2	0.128019	0	1	14964.6	GNMT
4459	cg04431776	0.815292	-37.019	37.019	0.000198654	-0.0121654	9938.33	0.827457	0	1	9902.74	GAGE2
17909	cg17886959	0.574941	36.9829	36.9829	0.000200314	0.0182687	5348.94	0.556672	0	1	5417.75	MT2A
11969	cg12019109	0.782153	-36.9285	36.9285	0.000202839	-0.013332	5168.07	0.795485	0	1	5170.85	AZGP1
19966	cg19979773	0.866406	-36.9181	36.9181	0.000203325	-0.0101059	10129.6	0.876512	0	1	10325	FCN3
5022	cg04979933	0.745173	-36.9177	36.9177	0.000203345	-0.014509	3307.47	0.759682	0	1	3319.71	INSL5
3012	cg02998425	0.808233	-36.905	36.905	0.000203937	-0.0124087	9268.7	0.820642	0	1	9185.93	ADAM21
27356	cg27420123	0.676431	-36.8971	36.8971	0.000204313	-0.0163113	8439.55	0.692743	0	1	8493.28	FSHB
13997	cg14036856	0.720816	-36.8967	36.8967	0.000204329	-0.0152016	10544.7	0.736017	0	1	10548.7	MGC52423
9430	cg09498007	0.150218	36.8579	36.8579	0.000206162	0.0124989	6181.65	0.137719	0	1	6218.56	CREG2
25413	cg25425005	0.88111	-36.8519	36.8519	0.00020645	-0.0094583	25572.8	0.890569	0	1	25239.1	HBZ
14373	cg14380517	0.263145	36.8148	36.8148	0.00020822	0.0159144	23387.8	0.247231	0	1	23461.6	BTG3
15433	cg15433631	0.0978088	36.7368	36.7368	0.000211993	0.010439	15595.9	0.0873698	0	1	15339.4	IRX2
11242	cg11308639	0.659797	-36.7172	36.7172	0.00021295	-0.0166356	2108.15	0.676432	0	1	2120.19	BMP10
1802	cg01781266	0.183711	36.6812	36.6812	0.000214726	0.0136258	12656.4	0.170085	0	1	12805.8	PARVA
12895	cg12955127	0.697497	-36.6782	36.6782	0.000214875	-0.015768	6203.34	0.713265	0	1	6307.94	ATP5F1
13816	cg13859324	0.645399	-36.6407	36.6407	0.000216736	-0.0169075	5497.9	0.662307	0	1	5562.6	UNC45B
27385	cg27453644	0.3325	36.6148	36.6148	0.000218034	0.0173011	13790.7	0.315199	0	1	13762.3	BCAP31
887	cg00862290	0.559722	-36.6027	36.6027	0.000218642	-0.0181502	3722.03	0.577872	0	1	3729.67	KCNMB3
24414	cg24454579	0.735032	-36.5466	36.5466	0.000221481	-0.0147386	3409.49	0.749771	0	1	3498.71	BIRC8
26820	cg26845278	0.748062	-36.5425	36.5425	0.000221691	-0.0143541	5062.94	0.762416	0	1	5096.16	SPATA21
9283	cg09347151	0.12835	36.5186	36.5186	0.000222915	0.0116317	5482.18	0.116719	0	1	5700.48	MGC39606
20818	cg20862119	0.797839	-36.5008	36.5008	0.000223828	-0.0127186	8368.9	0.810558	0	1	8364.2	KRT2B
21704	cg21697134	0.100472	36.4663	36.4663	0.000225615	0.0105138	15741.4	0.0899585	0	1	15873	FN3K
14677	cg14679202	0.385809	-36.45	36.45	0.000226462	-0.0181902	10004.6	0.403999	0	1	10015.1	L3MBTL2
18969	cg18979491	0.668862	-36.45	36.45	0.000226462	-0.0163863	5051.19	0.685249	0	1	5040.94	LBP
12113	cg12177001	0.794119	-36.4037	36.4037	0.000228894	-0.0128334	10201.5	0.806953	0	1	10292	IFI27
1918	cg01897036	0.861476	-36.3724	36.3724	0.000230549	-0.0102441	6464.43	0.87172	0	1	6517.68	SCTR
24875	cg24908058	0.898609	-36.336	36.336	0.000232486	-0.0086149	20875.9	0.907224	0	1	20932.3	CGB5
6926	cg06940107	0.786381	-36.3102	36.3102	0.000233874	-0.013085	6387.54	0.799466	0	1	6603.07	C21orf100
4628	cg04576021	0.592834	-36.3101	36.3101	0.000233878	-0.0176941	3302.02	0.610528	0	1	3327.74	HLA-DOB
11213	cg11277126	0.213183	36.3007	36.3007	0.000234386	0.0144725	8717.13	0.198711	0	1	8865.73	TRPC4AP
25391	cg25412453	0.755774	-36.3007	36.3007	0.000234386	-0.0140744	17309	0.769849	0	1	17350.5	DCST2
10168	cg10241097	0.757455	-36.2266	36.2266	0.000238418	-0.0140103	4256.23	0.771465	0	1	4308.5	UBL4B
15598	cg15586352	0.666371	-36.2131	36.2131	0.000239161	-0.0163907	28798.1	0.682762	0	1	28956	PSG5
1608	cg01593385	0.681698	-36.1936	36.1936	0.000240238	-0.0160456	3367.25	0.697743	0	1	3438.17	FGG
16427	cg16351002	0.691934	-36.1936	36.1936	0.000240238	-0.0158044	8638.35	0.707739	0	1	8621.34	CUZD1
20870	cg20910746	0.694877	-36.1936	36.1936	0.000240238	-0.0157329	4456.43	0.71061	0	1	4485.14	BBOX1
23510	cg23555120	0.15404	36.1936	36.1936	0.000240238	0.0125298	10463.6	0.14151	0	1	10483.2	NUAK1
24745	cg24781100	0.604136	-36.1936	36.1936	0.000240238	-0.0175062	2180.73	0.621642	0	1	2166.26	MYBPC1
16140	cg16051685	0.856881	-36.1754	36.1754	0.000241244	-0.0104075	10180.1	0.867289	0	1	10290.6	TRIM63
7001	cg07015629	0.0683756	36.1243	36.1243	0.000244099	0.00909519	23622	0.0592805	0	1	23547.3	ERBB4
26902	cg26937148	0.0937758	36.0986	36.0986	0.000245547	0.0101861	11917.1	0.0835897	0	1	11979.9	NR2F1
1886	cg01868128	0.688499	-36.0897	36.0897	0.000246053	-0.0158649	5637.95	0.704364	0	1	5688.83	LCE5A
11217	cg11283860	0.406719	35.9556	35.9556	0.00025377	0.0180995	10518.2	0.38862	0	1	10669.6	SLC45A1
3477	cg03459809	0.645711	-35.933	35.933	0.000255092	-0.0167489	5292.32	0.66246	0	1	5277.35	EPHX1
8526	cg08583049	0.0470782	35.8726	35.8726	0.000258669	0.00810212	21853.4	0.0389761	0	1	22349.7	FOXB1
13535	cg13599007	0.767173	-35.8726	35.8726	0.000258669	-0.0136427	4193.57	0.780816	0	1	4220.98	FABP6
17760	cg17741572	0.86965	-35.8612	35.8612	0.000259347	-0.00983441	15443.8	0.879485	0	1	15504.6	CFB
15795	cg15756091	0.82643	-35.7772	35.7772	0.000264413	-0.0115606	9025.6	0.83799	0	1	9123.18	RGSL2
10049	cg10134939	0.792725	-35.7659	35.7659	0.0002651	-0.0127785	19030.8	0.805504	0	1	19016.5	FLJ13391
6852	cg06851207	0.42022	35.738	35.738	0.00026681	0.0181573	5914.82	0.402063	0	1	6153.7	FLJ10781
10131	cg10212621	0.777166	-35.737	35.737	0.00026687	-0.0132965	12249.6	0.790463	0	1	12347.2	HMGCS2
18067	cg18058949	0.0843125	35.736	35.736	0.000266934	0.00974251	7343.39	0.07457	0	1	7429.02	NUP133
10653	cg10751811	0.49438	-35.7214	35.7214	0.000267829	-0.0183586	3537.42	0.512739	0	1	3550.72	CYP4Z1
6408	cg06434451	0.593106	-35.6878	35.6878	0.000269913	-0.0175486	10638.8	0.610655	0	1	10726	MARCKSL1
24901	cg24928161	0.815035	-35.6878	35.6878	0.000269913	-0.0119709	7479.9	0.827006	0	1	7520.92	SHBG
2052	cg02019333	0.607581	-35.6791	35.6791	0.000270449	-0.0173406	9450.34	0.624921	0	1	9538.44	UPK1B
13787	cg13837202	0.705028	-35.6633	35.6633	0.000271435	-0.015376	2886.39	0.720404	0	1	2937.71	PAGE5
19401	cg19404979	0.628595	-35.6633	35.6633	0.000271435	-0.0169984	5877.57	0.645594	0	1	5964.46	ELSPBP1
16151	cg16069910	0.789434	-35.593	35.593	0.000275866	-0.0128611	13304.7	0.802295	0	1	13265.6	TXNL6
24019	cg24073022	0.853019	-35.5378	35.5378	0.000279395	-0.0104823	4740.99	0.863502	0	1	4806.69	TAL2
19756	cg19777783	0.67795	-35.5266	35.5266	0.000280115	-0.0159942	7863.81	0.693945	0	1	7892.8	SLC15A4
16499	cg16418329	0.754279	-35.5224	35.5224	0.000280388	-0.0139804	6943.1	0.768259	0	1	7058.94	NYD-SP26
399	cg00396894	0.723302	-35.4482	35.4482	0.000285223	-0.0148573	14390.5	0.73816	0	1	14424.8	MGC44505
24184	cg24240626	0.655685	-35.4327	35.4327	0.000286242	-0.0164465	3867.97	0.672131	0	1	3885.97	REG3A
20411	cg20450764	0.201975	35.4315	35.4315	0.000286318	0.0139793	5896.06	0.187996	0	1	6001.55	TSPAN7
17529	cg17504145	0.743823	-35.4185	35.4185	0.000287179	-0.0142729	4327.81	0.758096	0	1	4343.81	CRYBB2
10124	cg10207745	0.652781	-35.3827	35.3827	0.000289553	-0.0164928	7388.47	0.669274	0	1	7344.44	C12orf36
16699	cg16638540	0.152371	35.3174	35.3174	0.00029394	0.0123333	20203.8	0.140038	0	1	20459.8	ZNF135
18853	cg18870231	0.748651	-35.2997	35.2997	0.000295142	-0.0141097	5444.84	0.762761	0	1	5468.04	C1orf87
10646	cg10742225	0.652318	-35.2991	35.2991	0.000295181	-0.0164842	3560.86	0.668802	0	1	3586.06	KRT13
2814	cg02810134	0.881803	-35.2547	35.2547	0.000298217	-0.00923902	17478.5	0.891042	0	1	17561.8	TNNC2
21505	cg21518208	0.605649	-35.2547	35.2547	0.000298217	-0.0172742	6777.81	0.622923	0	1	6694.24	KRTHB5
9357	cg09426307	0.655186	-35.2426	35.2426	0.000299047	-0.0164149	20231.5	0.671601	0	1	20543.9	SEC14L3
27376	cg27443224	0.647586	-35.2344	35.2344	0.000299613	-0.0165609	8981.81	0.664147	0	1	9109.96	CCL21
17434	cg17405586	0.658936	-35.2286	35.2286	0.000300014	-0.0163357	3296.35	0.675272	0	1	3261.29	KRT1
1725	cg01703884	0.773466	-35.2209	35.2209	0.000300547	-0.0133259	5044.67	0.786792	0	1	5065.53	FLJ37587
16541	cg16473288	0.743019	-35.2015	35.2015	0.000301889	-0.0142549	3166.46	0.757274	0	1	3191.89	OR1N1
11939	cg11984608	0.797212	-35.1985	35.1985	0.000302101	-0.0125278	5914.29	0.80974	0	1	5959.93	CLDN16
3953	cg03914397	0.654584	-35.1977	35.1977	0.000302155	-0.0164141	4562.85	0.670998	0	1	4524.39	NMUR2
4703	cg04645843	0.694716	-35.1977	35.1977	0.000302155	-0.0155344	6866.62	0.710251	0	1	6901.62	DPCR1
5468	cg05461276	0.828589	-35.1756	35.1756	0.000303693	-0.0113857	7461.77	0.839974	0	1	7452	PDZD3
17532	cg17505463	0.750151	-35.1756	35.1756	0.000303693	-0.0140383	18631.1	0.764189	0	1	18915.4	GGT2
4945	cg04897683	0.144069	35.1659	35.1659	0.000304373	0.0120086	13556.7	0.13206	0	1	13639.7	NEUROG1
6744	cg06757810	0.744767	-35.1659	35.1659	0.000304373	-0.0141944	3157.67	0.758962	0	1	3225.45	CNGB3
4057	cg04005707	0.091436	35.1619	35.1619	0.000304656	0.00996535	15989.4	0.0814707	0	1	16064.5	FLJ21511
17018	cg16986846	0.66243	-35.1023	35.1023	0.000308866	-0.0162338	9424.78	0.678664	0	1	9597.41	SCGB2A1
10901	cg10989326	0.671386	-35.0803	35.0803	0.000310435	-0.0160403	2826.27	0.687426	0	1	2836.37	EVI5
7798	cg07841014	0.848654	-35.0626	35.0626	0.0003117	-0.0105894	8217.94	0.859244	0	1	8319.72	REG1B
18835	cg18841952	0.635313	-35.0626	35.0626	0.0003117	-0.0167445	3196.28	0.652058	0	1	3201.15	GPR115
20975	cg21022395	0.692506	-35.0316	35.0316	0.000313936	-0.0155515	3496.88	0.708057	0	1	3607.9	SHOC2
2449	cg02431964	0.785685	-35.0262	35.0262	0.000314327	-0.0128885	4753.62	0.798573	0	1	4804.77	MARCO
25756	cg25780543	0.357717	34.9923	34.9923	0.00031679	0.0173168	29045.6	0.3404	0	1	29176.9	HTR5A
24782	cg24816298	0.665489	-34.965	34.965	0.000318787	-0.0161403	3012.22	0.681629	0	1	3089.28	PTH
18671	cg18669588	0.758748	-34.955	34.955	0.000319519	-0.0137373	10017.7	0.772485	0	1	10057.6	PTK9L
12270	cg12346881	0.804918	-34.9473	34.9473	0.000320085	-0.0122147	5437.98	0.817132	0	1	5512.35	ZNF300
6160	cg06200697	0.586663	-34.9211	34.9211	0.000322025	-0.0174493	14160.6	0.604113	0	1	14390.6	CTNND1
19291	cg19297688	0.775369	-34.9211	34.9211	0.000322025	-0.0132085	4295.7	0.788578	0	1	4318.76	INSL4
4416	cg04389838	0.271534	34.896	34.896	0.00032389	0.0157144	17914.3	0.25582	0	1	18177.2	ZNF501
24245	cg24310246	0.739595	-34.896	34.896	0.00032389	-0.0142916	5815.92	0.753887	0	1	5862.78	RAXL1
12502	cg12572939	0.0763287	-34.8317	34.8317	0.00032872	-0.00969711	22756.2	0.0860258	0	1	22707.5	F8A1
3562	cg03544320	0.14682	34.8244	34.8244	0.000329274	0.0120521	19175.7	0.134768	0	1	18741.6	CRMP1
18222	cg18219226	0.651857	-34.8202	34.8202	0.000329595	-0.0163822	7585.62	0.668239	0	1	7592.85	GUSB
7580	cg07612655	0.30089	34.813	34.813	0.000330138	0.0163212	19900.4	0.284569	0	1	19905	PTGIS
1926	cg01909245	0.722347	-34.8054	34.8054	0.000330722	-0.0147505	8093.47	0.737097	0	1	8183.13	LSP1
19999	cg20017995	0.654295	-34.793	34.793	0.000331668	-0.0163274	15384.6	0.670622	0	1	15651.5	SURF5
25579	cg25575065	0.102212	-34.787	34.787	0.000332126	-0.0107808	11597	0.112993	0	1	11636.3	ARSA
2323	cg02284188	0.755612	-34.7849	34.7849	0.000332286	-0.0137987	4849.16	0.769411	0	1	4946.59	TRIM49
9078	cg09137696	0.110389	34.746	34.746	0.000335276	0.0106728	14851	0.099716	0	1	14859.7	MT1A
11000	cg11075745	0.860488	-34.7271	34.7271	0.000336734	-0.0100634	24547	0.870552	0	1	24740.2	CLDN19
21194	cg21229055	0.11474	34.7271	34.7271	0.000336734	0.0108397	8906.21	0.1039	0	1	9073.65	GPM6B
21508	cg21519900	0.812387	-34.7271	34.7271	0.000336734	-0.0119106	5992.94	0.824298	0	1	6020.16	C20orf186
17230	cg17191715	0.788039	-34.697	34.697	0.00033908	-0.01275	6211.8	0.800789	0	1	6268.7	CA1
21092	cg21122774	0.807685	-34.697	34.697	0.00033908	-0.0120735	9580.64	0.819758	0	1	9509.72	SARDH
26794	cg26822241	0.828578	-34.697	34.697	0.00033908	-0.0113107	6004.16	0.839889	0	1	6099.07	CYP2C9
12894	cg12954718	0.648604	-34.6924	34.6924	0.000339439	-0.0164123	16489.9	0.665017	0	1	16613.6	USP6
18904	cg18913171	0.744304	-34.6831	34.6831	0.000340162	-0.0141119	2790.81	0.758416	0	1	2809.12	SLAMF9
11396	cg11466837	0.731679	-34.6222	34.6222	0.000344967	-0.0144584	7882.33	0.746137	0	1	7848.57	TRIM29
21449	cg21466821	0.73421	-34.6192	34.6192	0.000345205	-0.0143871	22497	0.748597	0	1	22287.5	HIPK4
19649	cg19668234	0.477389	-34.6006	34.6006	0.000346691	-0.0181058	12591.2	0.495495	0	1	12717.3	TSP50
2104	cg02077702	0.721435	-34.5897	34.5897	0.000347563	-0.014729	10817.1	0.736164	0	1	10910.1	ISLR
18526	cg18509239	0.739343	-34.5845	34.5845	0.000347976	-0.0142352	3893.09	0.753578	0	1	3908.2	IGSF10
26897	cg26928972	0.425722	34.5634	34.5634	0.000349675	0.0178995	2430.93	0.407823	0	1	2428.41	CSTA
9530	cg09588653	0.584638	-34.5565	34.5565	0.000350227	-0.017383	5330.18	0.602021	0	1	5349.34	SLC6A7
14596	cg14598387	0.553285	-34.4957	34.4957	0.000355166	-0.0177035	8927.75	0.570988	0	1	8979.35	OR1N1
10332	cg10412312	0.718879	-34.4162	34.4162	0.00036173	-0.0147636	2678.37	0.733643	0	1	2704.56	FLJ36004
25019	cg25041439	0.679581	-34.4057	34.4057	0.000362598	-0.0157129	3940.94	0.695294	0	1	3983.9	HYLS1
26373	cg26390526	0.774789	-34.3789	34.3789	0.000364844	-0.013129	3887.15	0.787918	0	1	3915.43	FLG
2969	cg02962602	0.514196	-34.368	34.368	0.000365765	-0.0179439	17408.1	0.53214	0	1	17529.4	CCDC57
24026	cg24076884	0.171901	34.3675	34.3675	0.000365806	0.0128323	22567	0.159068	0	1	22593.7	PCDHAC2
20272	cg20311730	0.833129	-34.3562	34.3562	0.000366759	-0.011087	10485.3	0.844217	0	1	10425.1	NALP10
19874	cg19882093	0.866648	-34.3501	34.3501	0.000367271	-0.00975967	12865.2	0.876407	0	1	12817.4	GGTLA4
24961	cg24992780	0.850908	-34.3422	34.3422	0.000367946	-0.0103952	6492.85	0.861303	0	1	6585.25	OR7C1
8481	cg08539093	0.834892	-34.3154	34.3154	0.000370219	-0.0110136	21354.4	0.845905	0	1	21439	OBP2B
11169	cg11237817	0.793371	-34.3085	34.3085	0.000370805	-0.0125039	18285.3	0.805875	0	1	18262.3	KIR3DL3
13488	cg13553455	0.638726	-34.2821	34.2821	0.000373071	-0.0165028	4307.23	0.655229	0	1	4400.06	COL17A1
17130	cg17095797	0.625945	-34.2761	34.2761	0.000373586	-0.0167214	9494.93	0.642666	0	1	9673.07	FOXL1
12163	cg12232274	0.124638	34.2713	34.2713	0.000374002	0.0111489	13466.1	0.11349	0	1	13648.5	LRP11
12030	cg12080675	0.0762486	34.2418	34.2418	0.000376548	0.00920672	9326.35	0.0670419	0	1	9515.55	KIAA0676
3003	cg02992632	0.101785	34.2082	34.2082	0.000379473	0.0102544	8669.39	0.0915304	0	1	8818.06	FGF12
19358	cg19368582	0.735809	-34.1915	34.1915	0.000380937	-0.0142587	12473.2	0.750068	0	1	12535.1	MMRN2
3907	cg03870862	0.604834	-34.175	34.175	0.000382388	-0.0170243	12928.5	0.621858	0	1	13063.2	ZC3H3
10042	cg10126923	0.504425	34.1455	34.1455	0.000384991	0.0179796	19331.8	0.486446	0	1	19308.2	NKG7
13282	cg13348944	0.628837	-34.1455	34.1455	0.000384991	-0.0166426	7665.3	0.645479	0	1	7684.64	SCN2B
25419	cg25427638	0.765615	-34.1455	34.1455	0.000384991	-0.0133727	16763	0.778988	0	1	16760.6	CYP2A7
11311	cg11378052	0.678506	-34.1186	34.1186	0.000387386	-0.0156722	2855.76	0.694179	0	1	2881.96	MGC48595
10844	cg10938286	0.881581	-34.0996	34.0996	0.00038908	-0.00910056	14620.7	0.890682	0	1	14964.5	CST2
7686	cg07711097	0.883103	-34.0482	34.0482	0.000393711	-0.00902981	14218.1	0.892133	0	1	14361.9	GML
3836	cg03805684	0.540518	-34.0459	34.0459	0.000393918	-0.0176985	8676.46	0.558216	0	1	8792.11	C11orf10
21098	cg21130124	0.865948	-34.0442	34.0442	0.000394074	-0.00974697	9490.67	0.875695	0	1	9576.4	CALML5
22936	cg22975568	0.792129	-34.039	34.039	0.000394545	-0.0124987	5102.5	0.804628	0	1	5122.15	CD74
5489	cg05477024	0.136029	33.9945	33.9945	0.000398613	0.0115273	5418.3	0.124502	0	1	5425.22	KIAA1804
7722	cg07752420	0.135773	33.9945	33.9945	0.000398615	0.0115176	9872.61	0.124256	0	1	9977.45	CDKN2A
26332	cg26353877	0.853147	-33.9876	33.9876	0.000399245	-0.0102553	15783.4	0.863403	0	1	16047.7	APCS
819	cg00795812	0.570089	-33.9227	33.9227	0.000405254	-0.0173986	33509.1	0.587488	0	1	34046.4	PDCD1
10993	cg11068096	0.795222	-33.9021	33.9021	0.000407181	-0.012372	16296.8	0.807594	0	1	16292.8	KRT14
4149	cg04103317	0.763593	-33.9014	33.9014	0.00040725	-0.0133892	29716	0.776983	0	1	29809.4	SPINK4
13159	cg13246269	0.576768	-33.9014	33.9014	0.00040725	-0.0173191	44334.2	0.594087	0	1	45023.8	AQP7
14054	cg14087150	0.742737	-33.9014	33.9014	0.00040725	-0.0140055	5415.77	0.756742	0	1	5415.23	KRTAP4-4
392	cg00384537	0.759817	-33.8862	33.8862	0.000408676	-0.0135012	5491.79	0.773318	0	1	5551.82	KRTHA5
6081	cg06119575	0.76906	-33.8783	33.8783	0.000409426	-0.0132154	3557.64	0.782276	0	1	3607.02	TAL2
16090	cg16003913	0.388123	33.8783	33.8783	0.000409426	0.0174112	17850	0.370712	0	1	18026.3	MPG
5168	cg05131835	0.82546	-33.8593	33.8593	0.000411214	-0.0112943	15276.3	0.836755	0	1	15359.2	GH2
17686	cg17683775	0.622159	-33.8593	33.8593	0.000411214	-0.0166838	6635.45	0.638843	0	1	6622.63	PTGES
18626	cg18623836	0.659034	-33.8584	33.8584	0.000411302	-0.0160195	4072.6	0.675054	0	1	4121.79	RRM2
6200	cg06236276	0.708912	-33.8279	33.8279	0.000414197	-0.0148936	28452.1	0.723805	0	1	28627.7	SLC22A2
10306	cg10379687	0.623938	-33.8113	33.8113	0.000415787	-0.0166432	3235.56	0.640581	0	1	3232.28	SPINLW1
14774	cg14774175	0.729706	-33.7584	33.7584	0.000420885	-0.0143387	6902.97	0.744044	0	1	6921	MAGEB3
14095	cg14120879	0.785133	-33.7516	33.7516	0.000421537	-0.0126792	5728.54	0.797812	0	1	5702.74	DEFB105A
17123	cg17091851	0.666278	-33.72	33.72	0.000424618	-0.0158434	8565.17	0.682122	0	1	8555.23	LOC348174
26918	cg26960719	0.662609	-33.6624	33.6624	0.000430286	-0.0159066	1994.1	0.678515	0	1	2011.29	KCNJ16
10645	cg10741760	0.127404	33.6294	33.6294	0.000433568	0.0111534	9120.6	0.116251	0	1	9221.42	HTR6
12676	cg12731488	0.636848	-33.598	33.598	0.000436719	-0.0163789	2132.22	0.653227	0	1	2149.32	SYTL5
1038	cg01015871	0.644851	-33.4717	33.4717	0.0004496	-0.01621	7806.27	0.661061	0	1	7639.78	MT4
4415	cg04388983	0.102623	33.4481	33.4481	0.000452048	0.0101822	4860.7	0.0924409	0	1	4929.56	P2RY2
8322	cg08370996	0.0943535	33.429	33.429	0.000454046	0.00985037	24249.9	0.0845031	0	1	24157.3	NR2F2
7998	cg08025786	0.822287	-33.3964	33.3964	0.000457469	-0.0113418	5796.08	0.833629	0	1	5858.57	CLK3
15859	cg15799267	0.298686	-33.3964	33.3964	0.000457469	-0.0162664	15106.2	0.314953	0	1	15203.3	ALOX15B
13995	cg14034870	0.641095	-33.3765	33.3765	0.000459564	-0.0162563	4879.16	0.657351	0	1	4864.56	SFTPG
7240	cg07264679	0.778543	-33.3519	33.3519	0.000462176	-0.0128256	5952.39	0.791369	0	1	6087.08	CD163
25000	cg25023829	0.783698	-33.3482	33.3482	0.000462573	-0.0126589	3502.93	0.796357	0	1	3510.72	H2BFS
10040	cg10125195	0.788755	-33.3397	33.3397	0.000463475	-0.012492	14490.6	0.801247	0	1	14466.4	LACRT
16087	cg16001913	0.762615	-33.3182	33.3182	0.00046578	-0.0133138	4398.21	0.775928	0	1	4453.78	HK1
26892	cg26924825	0.814543	-33.2788	33.2788	0.000470029	-0.0116008	9819.85	0.826144	0	1	9840.64	LCAT
26619	cg26656113	0.283038	-33.2525	33.2525	0.000472883	-0.0159349	25397	0.298972	0	1	25860.8	NPFFR2
5985	cg05997860	0.701919	-33.2411	33.2411	0.000474126	-0.0149481	8099.28	0.716867	0	1	8270.38	ADAM21
13487	cg13553204	0.764399	-33.2411	33.2411	0.000474126	-0.0132454	6475.8	0.777644	0	1	6522.06	CNKSR1
6944	cg06952310	0.506418	-33.1911	33.1911	0.000479615	-0.017685	7200.19	0.524103	0	1	7250.76	CSPG3
17948	cg17919471	0.745297	-33.1894	33.1894	0.000479799	-0.0137981	6361.75	0.759095	0	1	6560.11	XAGE3
3927	cg03885639	0.795472	-33.1818	33.1818	0.000480635	-0.0122418	20417.9	0.807714	0	1	20435	PANX3
19313	cg19320612	0.795087	-33.1812	33.1812	0.000480709	-0.0122541	4783.22	0.807342	0	1	4837.67	SCN9A
17427	cg17399166	0.736535	-33.1472	33.1472	0.00048448	-0.0140348	16550.7	0.75057	0	1	16833	CD1D
13601	cg13663218	0.171571	33.1295	33.1295	0.000486468	0.012604	21532.7	0.158967	0	1	21616.3	TRHDE
19835	cg19850370	0.694202	-33.1228	33.1228	0.00048722	-0.0151052	4907.01	0.709307	0	1	4908.73	SLC4A4
10729	cg10834677	0.687075	-33.1197	33.1197	0.000487562	-0.0152674	4425.06	0.702342	0	1	4366.93	FAM19A3
23495	cg23538064	0.801847	-33.1178	33.1178	0.000487781	-0.0120143	6159.05	0.813861	0	1	6169.49	CFB
7913	cg07950803	0.768419	-33.114	33.114	0.000488203	-0.0130966	7364.56	0.781516	0	1	7450.8	CD1A
24046	cg24092914	0.340603	33.114	33.114	0.000488203	0.0166208	7295.22	0.323982	0	1	7462.59	VHL
24221	cg24276445	0.846793	-33.114	33.114	0.000488203	-0.0103795	9641.25	0.857173	0	1	9803.32	CNR1
24560	cg24607535	0.752139	-33.0925	33.0925	0.000490622	-0.0135795	3305.71	0.765719	0	1	3349.24	CDH26
15981	cg15903837	0.725271	-33.0338	33.0338	0.000497297	-0.0143143	3126.33	0.739585	0	1	3130.85	P2RY6
17913	cg17890764	0.66473	33.0202	33.0202	0.00049886	0.0160336	4652.52	0.648696	0	1	4649.84	ITIH4
12786	cg12836863	0.416437	32.9694	32.9694	0.000504726	0.0174419	8720.59	0.398995	0	1	8769.01	BRCA2
14208	cg14228238	0.0802195	32.9197	32.9197	0.00051054	0.00920582	8776.57	0.0710137	0	1	8871.56	EVI1
8712	cg08763351	0.747601	-32.9125	32.9125	0.000511384	-0.0136779	3505.55	0.761279	0	1	3560.64	SPRR4
20959	cg21006686	0.530527	-32.91	32.91	0.000511678	-0.0174877	12939.7	0.548015	0	1	12948.7	NOS1
27243	cg27299588	0.628129	-32.9067	32.9067	0.000512073	-0.0163686	18837.5	0.644497	0	1	18715.6	PTPRS
9498	cg09551916	0.6742	-32.8973	32.8973	0.000513177	-0.0154994	6548.48	0.6897	0	1	6604.55	CFHR2
4062	cg04008843	0.542347	-32.8681	32.8681	0.000516638	-0.0173937	3621.1	0.55974	0	1	3635.43	TTR
5307	cg05292376	0.725432	-32.8655	32.8655	0.000516955	-0.0142744	16984.3	0.739706	0	1	16978.5	AATK
8338	cg08390254	0.723151	-32.8655	32.8655	0.000516955	-0.0143341	4526.7	0.737486	0	1	4528.54	ATP1A2
23298	cg23323879	0.797527	-32.8655	32.8655	0.000516955	-0.0121164	12142.6	0.809644	0	1	12156.3	CILP
26514	cg26545162	0.55549	-32.8655	32.8655	0.000516955	-0.0172826	7410	0.572773	0	1	7452.5	LGICZ1
27450	cg27519424	0.102031	32.813	32.813	0.000523238	0.0100668	6392.53	0.0919646	0	1	6650.86	HLCS
6232	cg06263943	0.640854	-32.775	32.775	0.000527836	-0.0161198	22673.7	0.656974	0	1	22858.3	CACNA1H
18322	cg18328334	0.58966	32.7668	32.7668	0.000528832	0.0170899	9273.78	0.57257	0	1	9249.19	TNS1
24229	cg24287460	0.857086	-32.7484	32.7484	0.000531076	-0.00992596	12488.8	0.867012	0	1	12530.9	CCDC48
22607	cg22637941	0.87437	-32.6773	32.6773	0.000539842	-0.00922203	6905.74	0.883592	0	1	6995.72	WISP1
7715	cg07747336	0.716515	-32.6704	32.6704	0.000540702	-0.0144671	4966.43	0.730982	0	1	5073.28	C11orf38
20134	cg20158826	0.77488	-32.6647	32.6647	0.000541417	-0.012815	20659.1	0.787695	0	1	20809.6	CCS
24618	cg24654350	0.764762	-32.6302	32.6302	0.000545733	-0.0131195	11793.5	0.777882	0	1	11817.5	KIR3DL1
23945	cg23988567	0.827627	-32.602	32.602	0.000549292	-0.0110217	25379.7	0.838649	0	1	25571.4
2134	cg02110963	0.82721	-32.6006	32.6006	0.000549465	-0.0110363	4448.86	0.838246	0	1	4508	MGC40222
9151	cg09212468	0.132278	32.5348	32.5348	0.00055786	0.0111618	6391.4	0.121116	0	1	6409.95	C16orf50
15573	cg15564267	0.66383	-32.5237	32.5237	0.000559282	-0.0156311	13186.5	0.679461	0	1	13181.6	OTUB1
23884	cg23921534	0.173873	32.5116	32.5116	0.000560837	0.0125675	3110.55	0.161306	0	1	3178.91	POU3F4
17442	cg17412560	0.632229	-32.5006	32.5006	0.00056226	-0.0162066	3105.45	0.648436	0	1	3126.18	CSEN
18972	cg18982568	0.719947	-32.4782	32.4782	0.000565169	-0.0143406	2780.37	0.734288	0	1	2838	KRT1B
17012	cg16983159	0.0826708	32.4466	32.4466	0.000569301	0.00924464	7506.63	0.0734261	0	1	7519.39	LOC340061
6873	cg06882926	0.637098	-32.4194	32.4194	0.000572874	-0.0161055	2061.67	0.653204	0	1	2045.25	OR1G1
12307	cg12387247	0.522738	-32.3884	32.3884	0.000576975	-0.017404	9901.97	0.540142	0	1	9870.85	FCER2
23114	cg23143093	0.783041	-32.3884	32.3884	0.000576975	-0.0125092	4603.66	0.795551	0	1	4663.89	NEK10
9246	cg09304624	0.671289	-32.37	32.37	0.000579431	-0.0154451	3198.08	0.686734	0	1	3243.58	PI15
5568	cg05564251	0.63016	-32.3484	32.3484	0.000582311	-0.0162049	10991.7	0.646365	0	1	11187.7	SP140
11587	cg11656547	0.146707	32.3484	32.3484	0.000582311	0.011639	20236.3	0.135068	0	1	20181.8	MAMDC2
15203	cg15209169	0.463237	-32.3484	32.3484	0.000582311	-0.0175402	8084.99	0.480777	0	1	8130.46	RABGAP1
26621	cg26656452	0.782748	-32.3275	32.3275	0.000585127	-0.0125065	7946.61	0.795254	0	1	7989.03	HABP2
12449	cg12530080	0.622268	-32.2398	32.2398	0.000597059	-0.0163087	2770.89	0.638577	0	1	2776.52	PMCHL1
25124	cg25133753	0.622441	-32.2251	32.2251	0.000599093	-0.0163024	3185.84	0.638743	0	1	3228.43	WFDC11
1936	cg01917648	0.766479	-32.2032	32.2032	0.000602109	-0.0129895	4599.75	0.779468	0	1	4673.2	SPIC
13337	cg13406950	0.32491	32.2032	32.2032	0.000602109	0.0161606	6867.33	0.308749	0	1	7030.81	GBP1
14079	cg14107638	0.665188	-32.2032	32.2032	0.000602109	-0.0155319	7199.89	0.68072	0	1	7324.87	MAGEA5
12401	cg12473775	0.735755	-32.1833	32.1833	0.000604888	-0.0138643	15199.5	0.749619	0	1	15343.8	RHOD
246	cg00226904	0.743154	-32.1797	32.1797	0.000605376	-0.01366	3714.59	0.756814	0	1	3718.97	SERPINB5
14693	cg14695751	0.639751	-32.1651	32.1651	0.000607414	-0.0159996	3687.88	0.655751	0	1	3717.86	ALS2CR7
26062	cg26090660	0.792702	-32.1018	32.1018	0.000616338	-0.0121465	16281.9	0.804848	0	1	16534.8	GDEP
15341	cg15343119	0.131235	32.0868	32.0868	0.000618465	0.0110533	11997.9	0.120182	0	1	12070.9	GALR1
15503	cg15503752	0.57021	-32.0636	32.0636	0.000621788	-0.0169449	8516.17	0.587155	0	1	8535.62	ST6GALNAC1
9372	cg09440243	0.727513	-32.0527	32.0527	0.000623347	-0.0140582	3729.21	0.741571	0	1	3800.59	PTPRD
6345	cg06378617	0.721017	-32.0439	32.0439	0.000624613	-0.0142244	3820.17	0.735241	0	1	3806.1	KRT23
6230	cg06259570	0.778474	-32.0109	32.0109	0.000629373	-0.0125853	4981.34	0.791059	0	1	4965.85	MMP27
25371	cg25391023	0.680539	-31.992	31.992	0.000632121	-0.0151667	4278.8	0.695706	0	1	4336.75	BTNL2
10757	cg10862848	0.601358	31.9806	31.9806	0.000633776	0.0167643	16597.5	0.584594	0	1	16518.6	GNMT
16527	cg16454349	0.759963	-31.9744	31.9744	0.000634692	-0.0131395	9010.73	0.773103	0	1	8921.28	FLJ25410
7799	cg07842062	0.751956	-31.8688	31.8688	0.000650315	-0.0133536	16606.5	0.765309	0	1	16727.2	MEFV
7324	cg07342901	0.850524	-31.856	31.856	0.000652229	-0.0100561	5775.52	0.86058	0	1	5932.35	H19
26739	cg26776077	0.868825	-31.8451	31.8451	0.000653875	-0.00933796	24627.4	0.878163	0	1	24608.8	FLJ45202
26800	cg26825412	0.460709	-31.8407	31.8407	0.000654523	-0.0174112	26205.4	0.478121	0	1	26542.7	SOX18
6725	cg06734812	0.541919	-31.8217	31.8217	0.000657405	-0.0171381	2239.67	0.559057	0	1	2273.34	BRUNOL5
20327	cg20359349	0.575637	-31.7899	31.7899	0.000662238	-0.016821	12503.3	0.592458	0	1	12612.6	2020-04-02
2369	cg02330106	0.730913	-31.7681	31.7681	0.000665561	-0.0139123	16664.2	0.744826	0	1	16661.7	MGMT
18394	cg18390025	0.304937	31.7653	31.7653	0.000666001	0.0157107	5749.9	0.289227	0	1	5854.3	ELOVL3
10349	cg10432859	0.756799	-31.7485	31.7485	0.000668579	-0.0131897	3560.16	0.769989	0	1	3603.23	UGT1A7
17710	cg17703554	0.795751	-31.7485	31.7485	0.000668579	-0.0119854	4306.39	0.807736	0	1	4326.21	WDR21C
13893	cg13929328	0.112671	31.7251	31.7251	0.000672193	0.0103176	22609.9	0.102353	0	1	22626.6	FLJ46831
13948	cg13985639	0.741046	-31.7107	31.7107	0.000674418	-0.0136268	10412.8	0.754673	0	1	10430.3	C10orf65
18782	cg18780284	0.688824	-31.6816	31.6816	0.000678958	-0.0149181	7830.64	0.703742	0	1	7899.57	SPRR1B
15073	cg15075718	0.745598	-31.6669	31.6669	0.000681252	-0.0134922	20038.4	0.759091	0	1	20035.1	MFRP
22488	cg22506453	0.697461	-31.6669	31.6669	0.000681252	-0.0147183	2344.46	0.712179	0	1	2375.78	KA35
26460	cg26499286	0.573971	-31.6669	31.6669	0.000681252	-0.0168065	8380.22	0.590777	0	1	8356.1	KRTAP17-1
4457	cg04431054	0.231064	-31.6659	31.6659	0.000681406	-0.0144131	5897.47	0.245477	0	1	6002.36	LOC133619
9787	cg09871043	0.658781	-31.6113	31.6113	0.000690038	-0.0155244	7415.02	0.674306	0	1	7533.4	PKHD1
20254	cg20291049	0.152478	31.5502	31.5502	0.000699802	0.011702	15180.8	0.140776	0	1	15063.6	POU3F3
6566	cg06577725	0.682759	-31.5295	31.5295	0.000703147	-0.0150182	3543.57	0.697777	0	1	3575.35	SPATA16
20356	cg20385229	0.708902	-31.4516	31.4516	0.000715878	-0.014405	5446.11	0.723307	0	1	5558.04	ALKBH
16777	cg16731240	0.189301	31.4482	31.4482	0.000716442	0.0128503	6515.28	0.176451	0	1	6443.15	ZNF577
17268	cg17237881	0.881844	-31.4447	31.4447	0.000717013	-0.00875789	16582.9	0.890602	0	1	16758.2	BIRC7
22947	cg22983529	0.0849145	31.4039	31.4039	0.000723779	0.00919861	22031.4	0.0757159	0	1	22121.1	GNG11
6902	cg06908778	0.110523	31.3594	31.3594	0.000731235	0.0101844	18718.3	0.100339	0	1	18852.7	SPAG6
18042	cg18023080	0.781217	-31.3594	31.3594	0.000731235	-0.0123835	8704.42	0.7936	0	1	8662.15	MASP2
3241	cg03221436	0.773844	-31.3063	31.3063	0.000740239	-0.0126015	4201.26	0.786445	0	1	4221.81	JM11
14996	cg14992253	0.0920198	31.3063	31.3063	0.000740239	0.00946685	8469.31	0.0825529	0	1	8665.73	C1orf91
27386	cg27456885	0.682921	-31.3063	31.3063	0.000740239	-0.0149669	2606.5	0.697888	0	1	2654.55	KRTAP22-1
10388	cg10479672	0.616179	-31.279	31.279	0.000744909	-0.0161759	7618.84	0.632355	0	1	7648.48	IL1F8
2659	cg02649337	0.921042	-31.2785	31.2785	0.000744993	-0.00705731	19759.1	0.9281	0	1	20048.6	MAGEA9
16245	cg16177830	0.632752	-31.2514	31.2514	0.000749658	-0.015909	2951.97	0.648661	0	1	2978.14	TNFRSF17
7904	cg07940804	0.642052	-31.2484	31.2484	0.000750167	-0.0157497	4954.14	0.657802	0	1	4977.31	ACTRT1
22637	cg22672790	0.408465	-31.2271	31.2271	0.000753866	-0.0170689	5027.83	0.425533	0	1	5124.57	GABRA6
26008	cg26026726	0.799288	-31.2146	31.2146	0.000756039	-0.0117775	16670	0.811065	0	1	16703.8	GPR42
8617	cg08670691	0.657597	-31.1965	31.1965	0.000759182	-0.0154545	3429.71	0.673051	0	1	3446.56	CCDC27
25940	cg25956985	0.609021	-31.1891	31.1891	0.000760489	-0.0162568	6293.34	0.625278	0	1	6192.27	MAP3K7IP1
2485	cg02490034	0.38869	31.1654	31.1654	0.00076464	0.0167558	21517.4	0.371934	0	1	21730.5	MEST
25263	cg25268718	0.561224	-31.1595	31.1595	0.000765687	-0.0168101	17959.2	0.578034	0	1	18093.9	PSME1
6770	cg06784466	0.671944	-31.1212	31.1212	0.000772462	-0.015155	3105.5	0.687099	0	1	3156.93	FPRL2
7543	cg07572435	0.884493	-31.085	31.085	0.000778933	-0.00860363	13289.6	0.893097	0	1	13350.8	LY6D
16882	cg16834187	0.779332	-31.0768	31.0768	0.00078041	-0.01239	3317.15	0.791722	0	1	3369.8	BRD7
20493	cg20543571	0.876875	-31.0707	31.0707	0.000781495	-0.00891167	10185.7	0.885786	0	1	10233.3	C15orf43
1614	cg01598642	0.808499	-31.0588	31.0588	0.00078365	-0.0114434	6117.38	0.819942	0	1	6245.65	HBG1
12898	cg12958813	0.690383	-31.0381	31.0381	0.00078739	-0.0147439	2436.02	0.705127	0	1	2460.71	ATP6V1G3
19042	cg19042947	0.629167	-31.0347	31.0347	0.00078801	-0.0159147	17141.9	0.645082	0	1	17410.5	SERPINA4
10432	cg10517312	0.585848	-30.9677	30.9677	0.00080026	-0.0165038	5977.18	0.602352	0	1	6105.84	RNF36
26308	cg26320696	0.101895	30.9615	30.9615	0.000801398	0.00979932	22169.9	0.0920957	0	1	21873.1	PARVA
15542	cg15540820	0.101011	30.9501	30.9501	0.000803513	0.00976347	11095.1	0.0912471	0	1	11300.3	EOMES
19828	cg19845843	0.796899	-30.9501	30.9501	0.000803513	-0.0118094	3826.57	0.808709	0	1	3830.4	CXorf20
14460	cg14458615	0.728494	-30.9173	30.9173	0.000809597	-0.0138025	2387.75	0.742297	0	1	2416.69	IGSF11
19759	cg19780563	0.778776	-30.9145	30.9145	0.000810119	-0.0123768	4133.97	0.791153	0	1	4200.98	EXOC6
26101	cg26125600	0.516987	-30.913	30.913	0.000810405	-0.0170603	13978.5	0.534048	0	1	14022.8	PF4V1
23334	cg23355492	0.626529	-30.9051	30.9051	0.000811884	-0.0159254	12100.4	0.642455	0	1	12264.2	SP6
21665	cg21663722	0.692612	-30.9041	30.9041	0.000812071	-0.0146633	3150.51	0.707275	0	1	3190.61	C20orf91
3944	cg03905144	0.667738	-30.8689	30.8689	0.00081868	-0.0151812	3905.2	0.68292	0	1	3945.91	MPDZ
2575	cg02579133	0.75612	-30.8482	30.8482	0.000822584	-0.0130357	3661.04	0.769156	0	1	3662.17	KRTAP10-8
563	cg00544557	0.868398	-30.8391	30.8391	0.000824305	-0.00921786	15826.7	0.877616	0	1	15864.1	DSCR10
21811	cg21831174	0.62331	-30.836	30.836	0.000824903	-0.0159584	2048.45	0.639268	0	1	2055.57	MASP1
18843	cg18854045	0.834362	-30.8027	30.8027	0.000831245	-0.0104975	6272.24	0.844859	0	1	6299.56	FLJ33534
8927	cg08987989	0.763241	-30.779	30.779	0.000835794	-0.0128166	3553.68	0.776057	0	1	3574.65	PGGT1B
7516	cg07545232	0.869944	-30.7784	30.7784	0.000835919	-0.00914824	12859.6	0.879092	0	1	12683.2	MAGEA3
12575	cg12629515	0.586569	-30.7679	30.7679	0.000837932	-0.0164428	3788.03	0.603012	0	1	3828.74	HIST1H2BO
17753	cg17738194	0.667066	-30.7405	30.7405	0.000843234	-0.0151647	5083.85	0.682231	0	1	4948.89	GK2
3606	cg03580247	0.700094	-30.7378	30.7378	0.00084377	-0.0144564	3806.4	0.714551	0	1	3846.06	SLC4A1
5327	cg05318777	0.24025	30.7378	30.7378	0.00084377	0.0140898	2766.75	0.22616	0	1	2785.88	BBS7
6340	cg06374075	0.10923	30.732	30.732	0.000844892	0.0100387	28999.9	0.0991913	0	1	28813.8	ADAM11
21111	cg21142398	0.749495	-30.732	30.732	0.000844892	-0.0131975	2379.48	0.762692	0	1	2427.67	GLIS1
22886	cg22925639	0.782658	-30.732	30.732	0.000844892	-0.0122201	3298.28	0.794878	0	1	3347.34	CHRNA1
5626	cg05628549	0.106782	30.729	30.729	0.000845475	0.00994649	21177.2	0.0968355	0	1	21378.2	PRKCDBP
9195	cg09256683	0.740988	-30.723	30.723	0.000846642	-0.013428	3882.33	0.754416	0	1	3887.63	CCL14
14501	cg14500718	0.416391	-30.7096	30.7096	0.000849263	-0.0169755	14800.4	0.433366	0	1	14606.5	TMEM79
7387	cg07412254	0.709843	-30.706	30.706	0.000849961	-0.0142177	12522.5	0.724061	0	1	12455.2	FLJ14816
10786	cg10889792	0.859081	-30.7011	30.7011	0.000850913	-0.00955826	17404.6	0.868639	0	1	17356.2	KRTAP5-9
26466	cg26504906	0.623523	-30.6845	30.6845	0.000854181	-0.0159144	14017.8	0.639438	0	1	14199.7	PRSS16
17339	cg17307280	0.075078	30.6832	30.6832	0.000854441	0.00870352	11215.9	0.0663745	0	1	11364.8	DRD1
26814	cg26838900	0.694495	-30.6197	30.6197	0.000867012	-0.0145554	15888.7	0.70905	0	1	15959.6	LRRC15
395	cg00392257	0.734757	-30.6067	30.6067	0.000869619	-0.0135703	13557.1	0.748327	0	1	13588.8	ISG20L2
15170	cg15175266	0.725158	-30.6053	30.6053	0.000869901	-0.0138181	3233.44	0.738976	0	1	3289.94	CDH12
3884	cg03852144	0.138997	30.5952	30.5952	0.000871921	0.0110802	7454.29	0.127917	0	1	7487.25	GLRX
15797	cg15758700	0.637185	-30.5769	30.5769	0.000875613	-0.0156681	2325.5	0.652853	0	1	2336.28	FLJ36004
20760	cg20804101	0.69041	-30.5769	30.5769	0.000875613	-0.0146354	6966.25	0.705045	0	1	6992.57	SLC6A13
3131	cg03109701	0.693817	-30.5706	30.5706	0.000876878	-0.0145581	8866.98	0.708375	0	1	8992.93	TMEM118
24088	cg24130010	0.179598	30.5456	30.5456	0.00088195	0.0123832	6782.62	0.167215	0	1	6844.22	CHODL
8090	cg08124030	0.739072	-30.5449	30.5449	0.00088208	-0.0134414	5163.57	0.752514	0	1	5259.9	TM4SF1
14199	cg14221171	0.164476	30.5271	30.5271	0.000885699	0.0119095	15892.7	0.152567	0	1	15960.3	TAC1
3271	cg03251857	0.83573	-30.523	30.523	0.000886537	-0.0104001	11214.8	0.84613	0	1	11256.4	PPAPDC3
12295	cg12376406	0.680524	-30.4979	30.4979	0.00089169	-0.0148292	6911.67	0.695353	0	1	6891.81	FAM12B
15227	cg15234096	0.773484	-30.4979	30.4979	0.00089169	-0.012454	3889.75	0.785938	0	1	3966.64	LIX1
10735	cg10840135	0.796815	-30.4946	30.4946	0.000892354	-0.0117254	22904.6	0.808541	0	1	22894	CYP2D6
11283	cg11346450	0.789948	-30.4291	30.4291	0.000905922	-0.0119343	8793.03	0.801882	0	1	8784.52	UGT1A3
7009	cg07022477	0.623217	-30.416	30.416	0.000908659	-0.0158532	3023.05	0.63907	0	1	3021.71	HIF3A
5157	cg05119831	0.0661994	30.4032	30.4032	0.000911331	0.00830508	9002.18	0.0578943	0	1	8995.06	PTPRN2
16846	cg16794682	0.819781	-30.3771	30.3771	0.00091683	-0.0109395	11634.8	0.83072	0	1	11724.4	CCND1
2462	cg02449608	0.852987	-30.3704	30.3704	0.000918256	-0.00974107	18206	0.862728	0	1	18192.2	C19orf18
20858	cg20899321	0.868101	-30.3591	30.3591	0.000920636	-0.00915968	7140.16	0.87726	0	1	7305.61	LRRC32
3406	cg03386373	0.736564	-30.3566	30.3566	0.000921168	-0.013469	3662.21	0.750033	0	1	3663.31	SPATA3
19664	cg19686152	0.624807	-30.3033	30.3033	0.000932535	-0.0158016	16753.8	0.640609	0	1	16879.4	TMOD3
4428	cg04398978	0.256874	30.302	30.302	0.000932833	0.0143843	7855.77	0.24249	0	1	7891.06	CBX4
4650	cg04595021	0.831292	-30.2906	30.2906	0.000935279	-0.0105222	3698.02	0.841814	0	1	3774.01	C21orf86
25837	cg25856811	0.663995	-30.2878	30.2878	0.000935888	-0.0151145	8789.91	0.679109	0	1	8948	SPRR3
11466	cg11527279	0.249666	30.2734	30.2734	0.000938984	0.014211	7377	0.235455	0	1	7427.43	TTLL11
16525	cg16449972	0.792862	-30.2726	30.2726	0.00093915	-0.0118124	4359.37	0.804675	0	1	4397.2	ZNF423
12438	cg12514506	0.810836	-30.2194	30.2194	0.000950745	-0.0112162	9449.9	0.822052	0	1	9508.75	OSBPL5
19221	cg19224837	0.0491485	30.2194	30.2194	0.000950745	0.00756842	13439.9	0.0415801	0	1	13567.9	GSC
4595	cg04545708	0.173979	-30.207	30.207	0.000953448	-0.0125237	5221.71	0.186503	0	1	5363.13	C11orf1
16124	cg16036738	0.639956	-30.207	30.207	0.000953448	-0.0155312	5045.89	0.655488	0	1	5033.31	TBPL2
22237	cg22262964	0.565457	-30.207	30.207	0.000953448	-0.0165197	15838.3	0.581977	0	1	16068.4
15449	cg15448245	0.754183	-30.1899	30.1899	0.000957205	-0.0129543	6413.52	0.767137	0	1	6437.26	GGTLA1
8544	cg08603768	0.652558	-30.1608	30.1608	0.00096366	-0.0152983	4778.64	0.667856	0	1	4762.48	WNT8A
4698	cg04640913	0.370111	-30.1527	30.1527	0.000965462	-0.0164694	12276.5	0.38658	0	1	12374.3	CDH22
27282	cg27345534	0.620778	-30.1234	30.1234	0.000971984	-0.0158172	2258.5	0.636595	0	1	2265.05	PRB2
5083	cg05039054	0.538849	-30.1209	30.1209	0.000972537	-0.0167174	2838.58	0.555567	0	1	2868.51	DMD
10139	cg10217445	0.134182	30.109	30.109	0.000975205	0.0108314	12718.6	0.12335	0	1	12703.3	OLIG2
9134	cg09195271	0.707544	-30.1047	30.1047	0.000976171	-0.0141386	11616.1	0.721682	0	1	11569.6	RNF186
24307	cg24355048	0.458603	-30.0905	30.0905	0.000979384	-0.0169443	8181.04	0.475548	0	1	8313.32	CTSG
4365	cg04336379	0.236946	30.063	30.063	0.000985608	0.0138589	1852.7	0.223087	0	1	1883.65	LOC389458
24900	cg24926780	0.583728	-30.0522	30.0522	0.000988048	-0.016288	34254.5	0.600016	0	1	34246.9	OR10H2
20193	cg20227165	0.63019	-30.0066	30.0066	0.000998486	-0.0156429	14725.6	0.645833	0	1	14699.5	PRDM11
12472	cg12552392	0.734677	-29.9165	29.9165	0.00101941	-0.0134289	4501.77	0.748106	0	1	4512.05	NFS1
17349	cg17328659	0.0823825	29.9014	29.9014	0.00102297	0.00889047	14590.7	0.073492	0	1	14651.8	STUB1
16771	cg16725130	0.499312	-29.878	29.878	0.0010285	-0.0168532	10656.9	0.516165	0	1	10768.5	MMP19
17959	cg17928268	0.658027	-29.8749	29.8749	0.00102922	-0.0151324	8876.31	0.67316	0	1	8876.84	CST11
8326	cg08375941	0.6169	-29.8637	29.8637	0.00103187	-0.0158129	2030.67	0.632713	0	1	2034.11	GPR15
27110	cg27168844	0.663035	-29.8605	29.8605	0.00103264	-0.015034	2068.65	0.678069	0	1	2085.2	IL17
23229	cg23256150	0.655144	-29.777	29.777	0.00105269	-0.0151641	2434.16	0.670308	0	1	2468.51	NR1H4
17219	cg17186163	0.290322	-29.7548	29.7548	0.00105807	-0.0152486	37126.9	0.305571	0	1	37551.9	C10orf10
12950	cg13018903	0.758669	-29.742	29.742	0.00106121	-0.0127424	4033.6	0.771411	0	1	4049.17	FLJ25530
12040	cg12087643	0.075725	29.7248	29.7248	0.00106542	0.00860405	23289	0.0671209	0	1	23302.5	GFRA1
11793	cg11843304	0.70186	-29.7	29.7	0.00107151	-0.0141859	5531.66	0.716046	0	1	5529.98	PTPRO
21103	cg21137417	0.724221	-29.6661	29.6661	0.00107991	-0.0136448	2819.57	0.737866	0	1	2865.7	SPP2
21657	cg21660130	0.893716	-29.65	29.65	0.00108392	-0.0080415	14830.5	0.901758	0	1	14976.3	CLCNKB
10983	cg11061975	0.800748	-29.6489	29.6489	0.0010842	-0.0114506	7892.72	0.812199	0	1	7917.34	SIRPB2
9511	cg09563216	0.289896	29.635	29.635	0.00108768	0.0149293	3522.02	0.274967	0	1	3530.73	C1orf51
19117	cg19130550	0.0906157	29.6203	29.6203	0.00109135	0.00917177	7124.99	0.0814439	0	1	7208.04	OLFML2B
26707	cg26751195	0.700863	-29.6009	29.6009	0.00109626	-0.014186	7101.6	0.715049	0	1	7146.4	SPN
27195	cg27257408	0.805419	-29.6009	29.6009	0.00109626	-0.0112904	10939.1	0.81671	0	1	11087	ACSBG1
18157	cg18140857	0.886297	-29.5916	29.5916	0.0010986	-0.00833523	24470.4	0.894633	0	1	24528.1	RDHE2
9664	cg09737668	0.877509	-29.5904	29.5904	0.00109891	-0.00868553	13335.2	0.886194	0	1	13348.1	SLAMF9
15047	cg15046693	0.561674	-29.5758	29.5758	0.00110261	-0.0163959	15765	0.57807	0	1	15945.5	CEBPG
20214	cg20253700	0.686148	-29.5682	29.5682	0.00110455	-0.0145009	2756.95	0.700649	0	1	2779.27	TSC2
7830	cg07873128	0.864998	-29.5074	29.5074	0.00112011	-0.00916111	11537.4	0.874159	0	1	11564.2	OSBPL5
13620	cg13675849	0.87615	-29.5074	29.5074	0.00112011	-0.00872815	7276.93	0.884879	0	1	7459.68	TRPV5
4121	cg04063348	0.699021	-29.5009	29.5009	0.00112178	-0.0142043	2579.24	0.713225	0	1	2609.09	IL17F
12544	cg12604192	0.700938	-29.5009	29.5009	0.00112178	-0.0141613	3213.73	0.7151	0	1	3227.15	KCNA10
16049	cg15974053	0.0721037	29.5009	29.5009	0.00112178	0.00842884	24082.6	0.0636748	0	1	23931.9	DHRS10
19551	cg19560210	0.75644	-29.4813	29.4813	0.00112686	-0.0127518	3004.1	0.769192	0	1	3002.4	PGBD5
21429	cg21450627	0.831479	29.4749	29.4749	0.00112852	0.0107562	24468.4	0.820723	0	1	24690.2	PSD4
7201	cg07218880	0.506598	-29.4679	29.4679	0.00113033	-0.0167189	5499.39	0.523317	0	1	5505.84	UPF3A
1813	cg01789267	0.706577	-29.4347	29.4347	0.00113901	-0.0140168	2536.21	0.720594	0	1	2523.34	SLC28A2
10376	cg10466917	0.668073	-29.4129	29.4129	0.00114474	-0.0148326	3084.49	0.682906	0	1	3136.93	TRY1
2590	cg02595219	0.199751	29.4124	29.4124	0.00114487	0.0127497	9840.51	0.187001	0	1	9876.69	KCNE3
7866	cg07905963	0.57332	-29.4066	29.4066	0.00114641	-0.0162379	9283.22	0.589558	0	1	9292.46	CYP2A13
20367	cg20398120	0.856906	-29.4043	29.4043	0.00114701	-0.00945061	15879.9	0.866356	0	1	15950.7	PRKAG3
25298	cg25310567	0.616725	-29.3495	29.3495	0.00116157	-0.0156881	3936.24	0.632413	0	1	3999.15	GALNTL5
7837	cg07879977	0.691228	-29.337	29.337	0.00116493	-0.0143384	21265.4	0.705567	0	1	21370	OR1F1
27400	cg27465849	0.859761	-29.337	29.337	0.00116493	-0.00933397	9551.19	0.869095	0	1	9711.62	THEDC1
22173	cg22194129	0.722939	-29.2912	29.2912	0.00117728	-0.0135944	19419.1	0.736533	0	1	19432.7	CLEC4C
22749	cg22789545	0.786644	-29.2104	29.2104	0.00119939	-0.0118151	31687.4	0.798459	0	1	31605	C20orf114
26032	cg26055770	0.104001	29.2072	29.2072	0.00120028	0.00961438	13965.2	0.0943868	0	1	13821.4	PDZRN3
21862	cg21890738	0.0889893	29.1937	29.1937	0.00120401	0.00904868	22573.9	0.0799406	0	1	22551.6	CYB561
22723	cg22767466	0.7785	-29.1487	29.1487	0.00121656	-0.0120506	3628.7	0.790551	0	1	3728.98	TRIM49
21964	cg21991396	0.476826	29.1133	29.1133	0.0012265	0.0166926	6163.41	0.460133	0	1	6254.86	CIAS1
2133	cg02105856	0.725867	-29.0975	29.0975	0.00123099	-0.0134831	4952.26	0.73935	0	1	4957.06	PIGR
13353	cg13424446	0.863593	-29.0888	29.0888	0.00123344	-0.00915527	10651.9	0.872748	0	1	10646.7	GGTLA4
20260	cg20300246	0.146458	29.0554	29.0554	0.00124298	0.0110688	8381.15	0.135389	0	1	8180.33	LHX3
4009	cg03962522	0.512413	-28.9993	28.9993	0.00125912	-0.0165775	25193	0.528991	0	1	25278.2	SLC5A1
663	cg00638514	0.0808222	28.8917	28.8917	0.00129071	0.00869512	11494.9	0.0721271	0	1	11579.4	OTOP3
5264	cg05245515	0.838295	-28.8917	28.8917	0.00129071	-0.0100549	6439.86	0.84835	0	1	6494.01	SLC39A2
26745	cg26780333	0.0767419	28.8917	28.8917	0.00129071	0.00853533	28062.6	0.0682066	0	1	27908.3	ACOT4
2256	cg02228185	0.645623	-28.8401	28.8401	0.00130615	-0.0151146	3015.07	0.660738	0	1	3017.88	ASPA
22419	cg22449114	0.2942	28.8342	28.8342	0.00130792	0.0148277	19127.5	0.279372	0	1	18979.9	TCF15
12436	cg12513379	0.48098	-28.7143	28.7143	0.00134452	-0.0165912	3462.35	0.497571	0	1	3431.8	OR10H2
22848	cg22881914	0.0592933	28.7143	28.7143	0.00134452	0.00781684	18057.5	0.0514765	0	1	18230.2	NID2
6445	cg06470471	0.732744	-28.6858	28.6858	0.00135337	-0.0132291	2869.33	0.745973	0	1	2903.8	LRTM1
27374	cg27442349	0.777488	-28.6702	28.6702	0.00135824	-0.0119957	14450.4	0.789484	0	1	14338.5	NFKBIB
16569	cg16501235	0.750913	-28.564	28.564	0.00139189	-0.0127298	8969.37	0.763643	0	1	9090.24	C1orf54
6090	cg06132342	0.675628	-28.5461	28.5461	0.00139762	-0.0144945	13495.9	0.690122	0	1	13471.1	KRTHB5
6540	cg06545504	0.737523	-28.5337	28.5337	0.00140164	-0.0130772	3383.93	0.7506	0	1	3401.34	HTN1
20504	cg20556988	0.771043	-28.4623	28.4623	0.00142486	-0.0121476	7404.49	0.783191	0	1	7510.23	CCL1
7318	cg07338205	0.675944	-28.444	28.444	0.00143088	-0.0144659	2190.95	0.69041	0	1	2231.75	G6PC2
19464	cg19464252	0.747397	-28.4168	28.4168	0.00143986	-0.0127957	19052.7	0.760193	0	1	19135.1	FBS1
9574	cg09632136	0.701484	-28.3709	28.3709	0.00145515	-0.0139111	2846.31	0.715395	0	1	2885.91	NNMT
11082	cg11161417	0.709295	-28.3322	28.3322	0.00146817	-0.0137255	9630.84	0.723021	0	1	9683.74	SPACA3
18868	cg18881269	0.892557	-28.3322	28.3322	0.00146817	-0.00792998	17361.3	0.900487	0	1	17483.5	LEPREL2
18731	cg18727700	0.736228	-28.2671	28.2671	0.00149035	-0.0130584	3930.09	0.749286	0	1	3987.48	SRPX2
10750	cg10857774	0.709264	-28.2659	28.2659	0.00149077	-0.0137125	24950.8	0.722977	0	1	25025.9	DMPK
1368	cg01356829	0.251593	28.2624	28.2624	0.00149198	0.0138274	5589.27	0.237765	0	1	5636.27	IL12RB2
17054	cg17026542	0.794149	-28.2255	28.2255	0.00150469	-0.0114131	16195.6	0.805562	0	1	16094	OR2A4
5350	cg05343453	0.779974	-28.2248	28.2248	0.00150495	-0.011842	3920.54	0.791816	0	1	3955.69	LOC136263
5549	cg05535113	0.349216	28.2185	28.2185	0.00150712	0.0155629	2749.39	0.333653	0	1	2752.86	CHST4
26838	cg26861460	0.347647	28.2038	28.2038	0.00151223	0.0155382	4668.8	0.332108	0	1	4783.98	PARVG
15566	cg15560337	0.8119	-28.2004	28.2004	0.00151342	-0.0108436	7978.34	0.822743	0	1	8053.99	HYAL4
1563	cg01541443	0.760203	-28.1771	28.1771	0.00152156	-0.0123987	3033.37	0.772601	0	1	3057.54	Ells1
4182	cg04132607	0.919708	-28.1771	28.1771	0.00152156	-0.00678915	26303.5	0.926497	0	1	26283.7	GATA5
27080	cg27132814	0.73284	-28.1771	28.1771	0.00152156	-0.0131233	7159.43	0.745963	0	1	7271.91	C20orf79
15622	cg15606663	0.617765	-28.1708	28.1708	0.00152378	-0.0153947	3372.51	0.63316	0	1	3350.43	KRTAP15-1
23239	cg23264413	0.597403	-28.1661	28.1661	0.00152542	-0.0156643	12137	0.613067	0	1	12330	PSG4
19647	cg19664945	0.738597	-28.1629	28.1629	0.00152654	-0.0129726	17703	0.75157	0	1	17547.5	GPR75
2320	cg02280309	0.796686	-28.1566	28.1566	0.00152876	-0.0113189	8376.64	0.808005	0	1	8389.29	PKLR
5636	cg05647859	0.136404	28.1289	28.1289	0.00153855	0.0105844	3979.45	0.125819	0	1	4024.08	LIN7A
18809	cg18807515	0.722177	-28.1237	28.1237	0.00154041	-0.0133734	5891.96	0.73555	0	1	5987.95	PRAMEF2
152	cg00136477	0.639585	-28.0983	28.0983	0.00154943	-0.0150415	30409.6	0.654627	0	1	30622.8	C1QC
14725	cg14722162	0.766449	-28.0788	28.0788	0.00155638	-0.0122031	5601.65	0.778652	0	1	5615.9	C5orf20
1198	cg01182697	0.260391	28.0731	28.0731	0.00155845	0.013976	5604.55	0.246415	0	1	5721.03	TMEM59
18670	cg18669381	0.636728	-28.0343	28.0343	0.00157241	-0.0150725	22791.1	0.651801	0	1	23027.8	ARHGEF19
23760	cg23812886	0.762325	-28.0181	28.0181	0.0015783	-0.0123071	5073.9	0.774632	0	1	5080.53	SSX5
16051	cg15975283	0.826785	-27.972	27.972	0.00159513	-0.0103094	6807.61	0.837094	0	1	6834.72	SLC9A11
8451	cg08507270	0.722132	-27.9702	27.9702	0.0015958	-0.0133422	2830.13	0.735474	0	1	2839.36	TAS2R8
16196	cg16122592	0.733135	-27.9639	27.9639	0.00159813	-0.0130697	4870.87	0.746205	0	1	4887.69	MAGEB6
23304	cg23326301	0.833347	-27.9511	27.9511	0.00160284	-0.0100812	11493.2	0.843428	0	1	11621.6	ADAM30
12799	cg12850636	0.763278	-27.9499	27.9499	0.00160329	-0.012266	4877.84	0.775544	0	1	4867.69	TJP3
21830	cg21846903	0.386142	27.9499	27.9499	0.00160329	0.0159129	14673.6	0.370229	0	1	14984.7	VTN
8553	cg08611714	0.665675	-27.948	27.948	0.00160399	-0.0145459	11315.6	0.680221	0	1	11390.9	KRTHA2
15417	cg15422147	0.837551	-27.9445	27.9445	0.00160528	-0.00993335	13796.9	0.847484	0	1	13722.9	SERPINB5
15247	cg15250797	0.146075	27.9197	27.9197	0.00161446	0.0108637	13682.9	0.135212	0	1	13603.5	SCTR
4418	cg04391540	0.494893	-27.8184	27.8184	0.00165258	-0.0163299	21177.3	0.511223	0	1	21432.1	ZNF541
12214	cg12286890	0.759148	-27.8184	27.8184	0.00165258	-0.012355	6068.22	0.771503	0	1	6127.6	XCL2
19956	cg19971655	0.886585	-27.8184	27.8184	0.00165258	-0.00809932	17307.5	0.894685	0	1	17362	BSND
22937	cg22975712	0.882155	-27.8184	27.8184	0.00165258	-0.00827295	16652.7	0.890428	0	1	16616.2	GALR3
12419	cg12493906	0.798928	-27.7881	27.7881	0.00166414	-0.0111821	6254.32	0.81011	0	1	6229.31	MMP26
8697	cg08747377	0.0993643	27.7861	27.7861	0.00166492	0.0092378	6668	0.0901265	0	1	6668.27	CDH13
8158	cg08201421	0.819769	-27.7767	27.7767	0.0016685	-0.0105099	16734.6	0.830279	0	1	16702.4	TNNC2
2883	cg02883161	0.152099	27.7558	27.7558	0.00167654	0.0110273	3909.82	0.141072	0	1	3903.43	MSI1
12929	cg12989650	0.677926	-27.7245	27.7245	0.00168871	-0.0142576	2912.86	0.692184	0	1	2952.61	ARHGEF15
27166	cg27223827	0.727214	-27.7104	27.7104	0.00169419	-0.0131617	13722.1	0.740376	0	1	13749.6	FHL2
19335	cg19345602	0.551093	-27.6804	27.6804	0.00170594	-0.0160045	3736.24	0.567098	0	1	3745.24	PATE
13940	cg13980719	0.580697	-27.6613	27.6613	0.00171343	-0.0157262	3658.36	0.596423	0	1	3645.02	TNP1
11266	cg11328149	0.803754	-27.6535	27.6535	0.00171653	-0.0110063	25984.8	0.81476	0	1	26047.8	LY6G6C
24190	cg24244000	0.749974	-27.6508	27.6508	0.00171759	-0.0125682	4516.2	0.762542	0	1	4513.21	GABRG3
15230	cg15236866	0.118629	27.6407	27.6407	0.0017216	0.00989957	5279.08	0.108729	0	1	5378.07	DLX1
25604	cg25607161	0.651767	-27.6399	27.6399	0.00172192	-0.0147232	2331.02	0.66649	0	1	2347.8	OR1A1
16700	cg16639185	0.432862	-27.618	27.618	0.00173062	-0.0162395	12800.3	0.449101	0	1	12900.8	LGTN
8330	cg08380205	0.162085	27.5986	27.5986	0.00173835	0.0113087	28645.7	0.150776	0	1	28414.6	SPSB4
4493	cg04457979	0.117632	27.5858	27.5858	0.00174349	0.00985558	9378.94	0.107777	0	1	9597.81	KCNQ1DN
7034	cg07047653	0.828488	-27.5858	27.5858	0.00174349	-0.0101855	11086.1	0.838674	0	1	11040	AQP2
16565	cg16495265	0.120327	27.5582	27.5582	0.00175461	0.00994441	6101.03	0.110383	0	1	6076.91	HOXB5
11613	cg11679069	0.682523	-27.5385	27.5385	0.0017626	-0.0141209	2843.77	0.696644	0	1	2851.47	DNAJC15
15372	cg15377518	0.218431	27.4524	27.4524	0.00179786	0.0128558	2819.69	0.205575	0	1	2828.75	ZFHX1B
15414	cg15417244	0.794528	-27.422	27.422	0.00181052	-0.0112516	6676.54	0.805779	0	1	6783.53	PDZRN4
782	cg00754253	0.284293	27.4184	27.4184	0.00181202	0.0143125	4216.67	0.269981	0	1	4228.63	HRASLS5
18201	cg18192417	0.113257	27.4117	27.4117	0.00181483	0.00967644	7615.34	0.103581	0	1	7685.18	NEBL
27345	cg27409364	0.337735	27.4117	27.4117	0.00181483	0.0151996	24852.6	0.322535	0	1	25103.5	KCNC1
11629	cg11695358	0.806807	-27.363	27.363	0.00183529	-0.010858	6097.29	0.817665	0	1	6132.27	MAPK15
25616	cg25623640	0.555547	-27.363	27.363	0.00183529	-0.0158851	2191.85	0.571432	0	1	2223.07	IGJ
1245	cg01237132	0.74854	-27.3608	27.3608	0.00183621	-0.0125465	4567.34	0.761086	0	1	4710.16	CST2
22161	cg22189286	0.746085	-27.3508	27.3508	0.00184045	-0.0126086	7500.14	0.758694	0	1	7576.93	HSPB8
17496	cg17470143	0.754404	-27.3359	27.3359	0.00184676	-0.0123854	6275.98	0.766789	0	1	6363.11	DCAMKL1
14311	cg14324838	0.840548	-27.3222	27.3222	0.0018526	-0.00972998	7387.42	0.850278	0	1	7367.34	EPB41L1
1033	cg01001286	0.239488	27.3167	27.3167	0.00185493	0.0133367	4936.96	0.226152	0	1	4992.19	IL16
13366	cg13435792	0.639117	27.2881	27.2881	0.0018672	0.0150814	5344.89	0.624035	0	1	5353.19	C12orf46
24240	cg24304714	0.438636	-27.2722	27.2722	0.00187404	-0.0161654	9529.75	0.454802	0	1	9703.33	LCE1C
18983	cg18988395	0.539325	-27.2621	27.2621	0.00187841	-0.0159775	2429.16	0.555303	0	1	2453.9	GLIS3
13414	cg13474734	0.824302	-27.2609	27.2609	0.00187891	-0.0102714	21490.8	0.834574	0	1	21544.2	FLJ43339
8174	cg08216808	0.339359	-27.227	27.227	0.00189363	-0.0153779	12246.6	0.354737	0	1	12282.5	ARPC2
11191	cg11258532	0.817536	-27.2049	27.2049	0.00190332	-0.0104849	12151.4	0.828021	0	1	12213.9	CA7
4525	cg04488521	0.0611675	27.2014	27.2014	0.00190485	0.00770349	15203.5	0.053464	0	1	15272.5	ZNF354C
11070	cg11154879	0.792027	-27.2014	27.2014	0.00190485	-0.0112848	20580.7	0.803312	0	1	20588.5	C20orf151
20815	cg20858526	0.770682	-27.1249	27.1249	0.00193867	-0.0118953	12365.7	0.782577	0	1	12353.6	CTRC
1889	cg01869233	0.630678	-27.1062	27.1062	0.00194706	-0.0149373	8265.29	0.645615	0	1	8243.95	C20orf75
19971	cg19985911	0.788582	-27.0997	27.0997	0.00194998	-0.0113701	6535.87	0.799953	0	1	6592.54	AVIL
19474	cg19478478	0.6502	-27.0814	27.0814	0.00195823	-0.0146156	2046.64	0.664816	0	1	2078.7	TRDN
12028	cg12078929	0.0383774	27.0372	27.0372	0.00197824	0.00676049	23381.1	0.0316169	0	1	23346	SERHL
25809	cg25833031	0.803397	-27.0372	27.0372	0.00197824	-0.0109067	13231	0.814303	0	1	13233.6	PAPD1
4495	cg04458548	0.74873	-27.02	27.02	0.00198612	-0.0124712	3878	0.761201	0	1	3892.05	FETUB
22230	cg22253945	0.814905	-27.0124	27.0124	0.00198957	-0.010537	29882.5	0.825442	0	1	29819.2	GPR45
8554	cg08612037	0.0765308	26.9975	26.9975	0.00199641	0.00827376	11528.8	0.0682571	0	1	11594.2	BTBD11
5627	cg05633152	0.874667	-26.9941	26.9941	0.00199798	-0.00844562	11333.5	0.883113	0	1	11354.6	SLC10A1
19241	cg19241311	0.66437	-26.96	26.96	0.00201372	-0.014335	17087	0.678705	0	1	16844.1	DEFB123
26912	cg26952188	0.822681	-26.96	26.96	0.00201372	-0.0102743	8586.04	0.832955	0	1	8697.46	MYO7A
12742	cg12795208	0.891906	-26.9531	26.9531	0.00201694	-0.00777775	16126.9	0.899684	0	1	16249	KRT6B
26078	cg26104206	0.446237	-26.8962	26.8962	0.00204353	-0.0160841	25578.5	0.462321	0	1	25869.9	PHYHIP
1379	cg01367992	0.472769	-26.8468	26.8468	0.00206689	-0.0160978	4225.21	0.488867	0	1	4217.38	LY9
7712	cg07745725	0.693805	-26.8153	26.8153	0.00208193	-0.0137234	5780.82	0.707528	0	1	5899.68	PSG3
24212	cg24269657	0.814259	-26.8153	26.8153	0.00208193	-0.0105241	16566.5	0.824783	0	1	16767.7	F7
13928	cg13968390	0.667737	-26.7853	26.7853	0.00209637	-0.0142329	3185.69	0.68197	0	1	3202.74	SULT1C1
11139	cg11212312	0.865619	-26.7815	26.7815	0.00209822	-0.00875253	9336.21	0.874372	0	1	9319	IL3
999	cg00962459	0.777722	-26.7803	26.7803	0.00209879	-0.0116276	13340.7	0.789349	0	1	13441.3	PROKR1
11064	cg11151665	0.811539	-26.7767	26.7767	0.00210055	-0.0106035	8695.88	0.822142	0	1	8757.17	PSG6
15848	cg15791248	0.633601	-26.7327	26.7327	0.0021219	-0.0148001	11141.7	0.648401	0	1	11249.6	FGFR1
6297	cg06324671	0.841768	-26.6976	26.6976	0.00213912	-0.00958902	9486.79	0.851357	0	1	9666.29	KRTAP19-7
2478	cg02477931	0.740751	-26.6906	26.6906	0.00214259	-0.0126082	4187.6	0.753359	0	1	4197.52	C11orf39
24462	cg24496423	0.403098	-26.6902	26.6902	0.00214278	-0.0158423	24179.3	0.41894	0	1	24641.5	STK23
1625	cg01605984	0.683629	-26.6809	26.6809	0.0021474	-0.0139002	17962.6	0.697529	0	1	18292	SURF5
18512	cg18499731	0.67323	-26.6793	26.6793	0.00214818	-0.0141027	2284.47	0.687332	0	1	2332.68	HBII-438B
7823	cg07864297	0.776606	-26.6438	26.6438	0.0021658	-0.0116329	6400.05	0.788239	0	1	6390.76	ESRRB
24598	cg24643262	0.395525	26.6335	26.6335	0.00217093	0.0156525	8451.03	0.379872	0	1	8529	BMX
26553	cg26594445	0.78609	-26.6331	26.6331	0.00217113	-0.0113554	4637.86	0.797446	0	1	4700.12	MRPL49
2637	cg02630207	0.685115	-26.6266	26.6266	0.00217438	-0.0138567	4124.11	0.698971	0	1	4157.26	FLJ10379
2343	cg02305261	0.111881	26.6245	26.6245	0.00217543	0.00950282	25754.4	0.102378	0	1	25748.1	KCNG1
1857	cg01830294	0.170123	26.624	26.624	0.00217568	0.0113654	34007.6	0.158758	0	1	33628.1	WNT2
20490	cg20542190	0.371748	-26.624	26.624	0.00217568	-0.0155738	8351.7	0.387322	0	1	8286.47	LILRA4
27306	cg27371741	0.703545	-26.624	26.624	0.00217568	-0.0134675	5032.44	0.717013	0	1	5157.06	TDGF1
1631	cg01612158	0.512322	-26.6094	26.6094	0.00218304	-0.0159437	1723.12	0.528265	0	1	1712.12	FCRL4
23427	cg23464269	0.706534	-26.6094	26.6094	0.00218304	-0.0133977	10534	0.719932	0	1	10584.9	UGT1A3
6831	cg06832950	0.858165	-26.6088	26.6088	0.00218332	-0.0089947	7948.62	0.867159	0	1	8143.87	SPG3A
27248	cg27305303	0.391221	-26.5811	26.5811	0.00219731	-0.0157259	17755.9	0.406947	0	1	17849.8	OTOF
6901	cg06908474	0.0483495	-26.5739	26.5739	0.00220097	-0.00740921	23447	0.0557588	0	1	23785.8	CAT
15579	cg15569340	0.0642795	26.5739	26.5739	0.00220097	0.007744	17569.9	0.0565355	0	1	17610.8	RBP5
9488	cg09546307	0.795895	-26.531	26.531	0.00222279	-0.0110414	4283.86	0.806936	0	1	4287.44	CLEC4D
13463	cg13523557	0.126618	26.5215	26.5215	0.00222766	0.00998433	16282.1	0.116633	0	1	16384.5	ADCY1
4638	cg04584523	0.874875	-26.4646	26.4646	0.00225705	-0.00836253	10633.2	0.883238	0	1	10808.8	ELA3B
24889	cg24919972	0.189858	26.4348	26.4348	0.00227258	0.0118892	4935.37	0.177968	0	1	4968.03	FYCO1
15874	cg15811427	0.654481	-26.4062	26.4062	0.00228761	-0.0143756	2090.08	0.668856	0	1	2133.82	FPR1
18326	cg18330203	0.78744	-26.3965	26.3965	0.00229274	-0.0112693	16426	0.798709	0	1	16405.3	TNNT2
317	cg00298357	0.868206	-26.3849	26.3849	0.00229884	-0.00859809	29489.1	0.876804	0	1	29247.3	IL17B
15867	cg15804973	0.341841	-26.3626	26.3626	0.0023107	-0.0151819	3079.04	0.357023	0	1	3062.54	MAP3K5
17363	cg17342759	0.718241	-26.3394	26.3394	0.00232308	-0.0130738	4513.93	0.731315	0	1	4621.5	PPP2R2B
19701	cg19723473	0.759098	-26.2941	26.2941	0.00234742	-0.012046	7344.9	0.771144	0	1	7472.75	B3GALT1
26805	cg26829529	0.609256	-26.2804	26.2804	0.00235483	-0.0150295	7433.4	0.624285	0	1	7407.92	SPACA3
3059	cg03038672	0.833029	-26.2626	26.2626	0.00236449	-0.00981307	5949.47	0.842842	0	1	5873.88	CLDN9
15064	cg15060813	0.787582	-26.2594	26.2594	0.00236625	-0.0112393	8931.97	0.798821	0	1	8920.78	LRFN3
23122	cg23152755	0.66108	-26.2541	26.2541	0.00236915	-0.0142227	3024.11	0.675303	0	1	3019.37	DEFB105A
18297	cg18294158	0.668851	-26.25	26.25	0.00237137	-0.0140801	3799.38	0.682931	0	1	3812.88	ORC5L
927	cg00899659	0.256985	26.2374	26.2374	0.00237827	0.0134818	5072.09	0.243504	0	1	5159.01	ZNF22
1775	cg01753375	0.584439	-26.2164	26.2164	0.00238977	-0.0153056	27071.7	0.599744	0	1	27330.6	DCTN1
10200	cg10276549	0.566371	-26.2164	26.2164	0.00238977	-0.0154848	10017.8	0.581856	0	1	10250.4	GABRE
11018	cg11096993	0.475087	-26.2164	26.2164	0.00238977	-0.0159194	11031.6	0.491007	0	1	11064.8	ACY3
4840	cg04784315	0.411438	26.2152	26.2152	0.00239045	0.015659	5633.3	0.395779	0	1	5723.04	GPR21
20442	cg20488657	0.897564	-26.2152	26.2152	0.00239045	-0.00746024	13305.1	0.905025	0	1	13257.9	TFF3
23134	cg23163573	0.557788	-26.215	26.215	0.00239055	-0.0155559	6701.74	0.573344	0	1	6740.49	SULT1C1
12106	cg12163132	0.304336	26.2126	26.2126	0.00239189	0.0143758	16544	0.28996	0	1	16727.1	TBX2
15119	cg15121304	0.705067	-26.2126	26.2126	0.00239189	-0.0133371	26778.3	0.718404	0	1	26830
21605	cg21613754	0.797401	-26.2126	26.2126	0.00239189	-0.0109352	3254.32	0.808336	0	1	3275.19	PNKD
27367	cg27433062	0.765178	-26.1849	26.1849	0.00240719	-0.0118554	2965.44	0.777033	0	1	2989.58	APOA2
11267	cg11328541	0.636388	-26.1789	26.1789	0.00241053	-0.0146111	3202.2	0.650999	0	1	3237.75	OR7C1
10169	cg10242476	0.619523	-26.1345	26.1345	0.00243529	-0.014849	4202.16	0.634372	0	1	4249.96	TDGF1
2538	cg02537023	0.415891	-26.1149	26.1149	0.0024463	-0.0157525	23863.9	0.431643	0	1	24157.2	NCF1
10231	cg10305797	0.740623	-26.1008	26.1008	0.00245425	-0.0124802	6640.74	0.753104	0	1	6603.74	UNQ467
4032	cg03986640	0.80372	-26.074	26.074	0.00246943	-0.0107172	9725.93	0.814437	0	1	9792.15	MIP
24942	cg24975222	0.0563109	26.0704	26.0704	0.00247148	0.00736743	18209.8	0.0489435	0	1	18256.1	CDCP1
3187	cg03160135	0.134796	26.0605	26.0605	0.00247711	0.0101718	22649.7	0.124624	0	1	22593.2	VGLL2
19102	cg19111262	0.62138	-25.9734	25.9734	0.00252732	-0.0147836	10601.6	0.636164	0	1	10876.1	IGSF9
8982	cg09038914	0.706813	-25.9571	25.9571	0.00253681	-0.0132428	15857.9	0.720056	0	1	16056.1	GFAP
5876	cg05885720	0.782012	-25.9546	25.9546	0.00253828	-0.01134	3221.93	0.793352	0	1	3224.11	EMP1
11168	cg11237738	0.756591	-25.9429	25.9429	0.00254513	-0.0120375	3732.2	0.768629	0	1	3809.22	C4orf6
25819	cg25840094	0.638811	-25.9393	25.9393	0.00254725	-0.0145147	2994.72	0.653326	0	1	3064.1	CFHR5
14608	cg14606768	0.83177	-25.9179	25.9179	0.0025598	-0.00979489	4179.95	0.841565	0	1	4267.46	C9
25741	cg25762706	0.750137	-25.8646	25.8646	0.00259146	-0.0121902	10636.5	0.762327	0	1	10631.3	STMN4
20748	cg20793071	0.184693	25.837	25.837	0.00260798	0.0116258	2765.94	0.173067	0	1	2801.36	TMEM59
12868	cg12927617	0.741382	-25.8221	25.8221	0.00261694	-0.0124035	3227.17	0.753785	0	1	3210.34	ORM1
16707	cg16648841	0.673299	-25.796	25.796	0.00263269	-0.013887	3653.12	0.687186	0	1	3683.95	C8A
16874	cg16826286	0.756951	-25.796	25.796	0.00263269	-0.0119983	17823.4	0.76895	0	1	17929.6	LYZL6
2142	cg02121427	0.574878	-25.7954	25.7954	0.00263305	-0.0152909	5233.75	0.590168	0	1	5199.43	LRRC15
19487	cg19491035	0.192801	25.7871	25.7871	0.00263812	0.0118359	13716.2	0.180965	0	1	13896.5	MANSC1
3362	cg03349935	0.866614	-25.7752	25.7752	0.00264535	-0.00856543	15059.5	0.87518	0	1	15067.4	RASL12
24976	cg25006823	0.446719	-25.7715	25.7715	0.0026476	-0.0157708	18948.4	0.462489	0	1	19131.8	FLJ33387
15311	cg15310162	0.735487	-25.7691	25.7691	0.00264904	-0.0125358	2679.85	0.748023	0	1	2695.85	CLDN14
6097	cg06141025	0.725448	-25.7662	25.7662	0.00265082	-0.0127752	5565.18	0.738223	0	1	5670.97	GYS2
13670	cg13726507	0.826178	-25.7607	25.7607	0.0026542	-0.00995082	6705.04	0.836129	0	1	6753.97	CTAG2
26952	cg27000831	0.641828	-25.7318	25.7318	0.0026719	-0.0144141	3487.37	0.656242	0	1	3544.47	CCL8
280	cg00260778	0.696054	-25.73	25.73	0.00267302	-0.0134179	3150.38	0.709472	0	1	3228.16	C10orf111
7087	cg07086380	0.577649	-25.7192	25.7192	0.00267964	-0.0152403	6986.06	0.592889	0	1	7119.18	TNFAIP8
10302	cg10377274	0.817182	-25.7192	25.7192	0.00267964	-0.0102323	7390.85	0.827414	0	1	7500.23	PATE
23626	cg23667432	0.655076	-25.7167	25.7167	0.00268122	-0.0141903	19319.7	0.669266	0	1	19287.5	ALPP
502	cg00488364	0.699174	-25.7094	25.7094	0.0026857	-0.013346	2554.02	0.712519	0	1	2656.96	IL13RA2
7656	cg07685034	0.622031	-25.7094	25.7094	0.0026857	-0.0147026	4116.36	0.636734	0	1	4144.31	PCBP3
23154	cg23181170	0.67801	-25.682	25.682	0.00270273	-0.0137658	2819.83	0.691776	0	1	2824.75	GABRP
13045	cg13131015	0.705102	-25.6731	25.6731	0.00270823	-0.013211	2939.44	0.718314	0	1	2993.88	GUCY2C
9637	cg09699159	0.807507	-25.6037	25.6037	0.00275186	-0.0105139	5568.61	0.818021	0	1	5646.51	PRDM11
18516	cg18503260	0.131297	25.5796	25.5796	0.00276718	0.00997515	5343.99	0.121321	0	1	5467.91	CA13
7749	cg07785936	0.745188	-25.5725	25.5725	0.0027717	-0.0122519	14028.3	0.75744	0	1	13904	GPR39
17952	cg17922226	0.678207	-25.5587	25.5587	0.00278055	-0.0137335	9036.04	0.69194	0	1	9124.75	CLCN1
16109	cg16019620	0.725356	-25.5323	25.5323	0.00279749	-0.0127249	2721.92	0.738081	0	1	2765.76	MEP1A
11051	cg11134443	0.658387	-25.5286	25.5286	0.00279986	-0.0140875	1946.05	0.672474	0	1	1970.74	KYNU
14549	cg14544583	0.676528	-25.5115	25.5115	0.0028109	-0.0137541	2449.54	0.690282	0	1	2453.68	HBB
11672	cg11724759	0.732442	-25.5073	25.5073	0.00281366	-0.0125508	3563.43	0.744993	0	1	3585.37	RPE65
14216	cg14238120	0.680624	-25.5046	25.5046	0.00281539	-0.0136732	16306.5	0.694297	0	1	16243.5	ELA3A
27472	cg27544190	0.141305	25.5015	25.5015	0.00281738	0.0102786	20148.8	0.131027	0	1	20176.1	C21orf63
13321	cg13391235	0.559467	-25.4543	25.4543	0.00284819	-0.015335	5291.73	0.574802	0	1	5320.32	MGC22001
18461	cg18450227	0.935044	-25.4379	25.4379	0.00285899	-0.00584948	18316.1	0.940893	0	1	18464.4	MAPK4
24227	cg24286301	0.708161	-25.429	25.429	0.00286481	-0.0130892	5378.35	0.721251	0	1	5416.83	GUCY2F
9671	cg09748960	0.66904	-25.4161	25.4161	0.00287337	-0.0138693	2153.9	0.682909	0	1	2186.07	BTNL2
17996	cg17978274	0.835737	-25.4161	25.4161	0.00287337	-0.0095771	8132.47	0.845314	0	1	8226.08	C15orf32
5787	cg05790038	0.766169	-25.3976	25.3976	0.00288563	-0.0116668	19825.6	0.777836	0	1	19867.8	TRPV3
19097	cg19109050	0.66799	-25.3872	25.3872	0.00289254	-0.0138811	18934.8	0.681871	0	1	18892.1	OBSCN
24269	cg24331162	0.784128	-25.3725	25.3725	0.00290237	-0.0111628	16154.1	0.795291	0	1	16236.4	SYT8
14246	cg14271690	0.830567	-25.3558	25.3558	0.00291353	-0.00973707	9624.47	0.840304	0	1	9700.41	SMAF1
5565	cg05559445	0.452418	25.3513	25.3513	0.00291657	0.015624	14140.9	0.436794	0	1	14268.8	CDKN1C
20487	cg20540428	0.528303	-25.3097	25.3097	0.00294463	-0.0155076	24563.6	0.543811	0	1	24567	PPP4R2
1966	cg01941619	0.685267	-25.2766	25.2766	0.00296714	-0.0135283	3205.2	0.698796	0	1	3204.11	MEP1B
11403	cg11469778	0.332018	-25.263	25.263	0.00297646	-0.0147627	23035.8	0.346781	0	1	23398.5	ARHGEF4
16533	cg16465939	0.205317	25.2447	25.2447	0.00298905	0.0120483	22683.1	0.193269	0	1	22807.7	KCNQ1
19923	cg19937039	0.669583	-25.2163	25.2163	0.00300862	-0.0138114	5116.4	0.683394	0	1	5204.94	SERPINA10
538	cg00518911	0.649706	-25.2082	25.2082	0.00301426	-0.0141539	2979.3	0.66386	0	1	2973.41	HOXA10
26138	cg26153631	0.300874	25.1953	25.1953	0.00302324	0.0140642	27405.7	0.286809	0	1	27566.4	HOXC10
27444	cg27513764	0.764203	-25.184	25.184	0.00303111	-0.0116757	4212.1	0.775878	0	1	4212.25	EFCAB3
27516	cg27588902	0.19302	25.184	25.184	0.00303111	0.0117151	18749	0.181304	0	1	18712	GNMT
5991	cg06003187	0.889951	-25.1645	25.1645	0.00304473	-0.00761473	17580.2	0.897565	0	1	17677.4	GUCA2A
10293	cg10368842	0.629941	-25.1523	25.1523	0.00305327	-0.0144461	4524.24	0.644387	0	1	4499.22	C10orf81
25667	cg25682080	0.682925	-25.1489	25.1489	0.00305567	-0.0135424	4472.12	0.696467	0	1	4468.96	APOA5
22677	cg22724153	0.672214	-25.1341	25.1341	0.00306613	-0.0137415	3964.42	0.685956	0	1	3977.9	SPAM1
21702	cg21695020	0.77365	-25.1259	25.1259	0.00307193	-0.0114071	13856.8	0.785057	0	1	13831.5	DPEP3
21110	cg21142272	0.752701	-25.123	25.123	0.00307398	-0.0119631	27153.2	0.764664	0	1	27211.3	LOC283849
12777	cg12830694	0.866087	-25.1221	25.1221	0.00307461	-0.00848442	12087.9	0.874572	0	1	12112	PPP1R14A
4020	cg03972838	0.704975	-25.1202	25.1202	0.00307593	-0.0130842	23561.4	0.718059	0	1	23734.3	FLJ20232
18830	cg18838701	0.28333	-25.1023	25.1023	0.00308867	-0.0139776	9477.1	0.297308	0	1	9509.5	TNNI3
7647	cg07676849	0.651408	-25.0164	25.0164	0.00315034	-0.0140769	2704.53	0.665485	0	1	2721.71	FOLR3
21350	cg21372914	0.758916	-25.0041	25.0041	0.00315932	-0.0117781	15679.2	0.770694	0	1	15519.9	CLEC4M
8199	cg08251036	0.82121	-24.9763	24.9763	0.00317957	-0.00997245	6564.2	0.831183	0	1	6674.57	MGAT5
24386	cg24435562	0.115027	-24.9308	24.9308	0.00321305	-0.00964855	15044.2	0.124675	0	1	15517.3	PCDHB13
26949	cg26991292	0.0929548	-24.9065	24.9065	0.00323111	-0.00887984	14009.3	0.101835	0	1	14103.5	NFKBIL1
9969	cg10054857	0.677667	-24.9048	24.9048	0.00323232	-0.013585	2758.76	0.691252	0	1	2792.86	C18orf20
20365	cg20395892	0.115816	24.9048	24.9048	0.00323232	0.00935271	16389.8	0.106464	0	1	16596.5	IRAK3
26935	cg26981881	0.650604	-24.8974	24.8974	0.00323789	-0.0140604	1982.46	0.664664	0	1	2012.98	2020-12-01
7177	cg07189381	0.252132	-24.8793	24.8793	0.00325137	-0.0133328	4213.06	0.265464	0	1	4264.83	TNNT1
24065	cg24110063	0.755839	-24.8793	24.8793	0.00325137	-0.0118319	7414.69	0.767671	0	1	7382.35	COX6A2
24683	cg24713204	0.193159	24.8643	24.8643	0.00326268	0.0116518	24304.1	0.181507	0	1	24453.2	ZNF471
9146	cg09207718	0.841327	-24.8467	24.8467	0.00327593	-0.00929588	14523.8	0.850623	0	1	14521.5	CYP1A2
21314	cg21335556	0.77228	-24.8467	24.8467	0.00327593	-0.0113883	6786.18	0.783668	0	1	6889.92	FLJ35773
14609	cg14607011	0.849279	-24.8445	24.8445	0.00327756	-0.00902712	8378.6	0.858306	0	1	8418.61	C10orf125
21029	cg21065959	0.673581	-24.8445	24.8445	0.00327756	-0.0136446	16657.2	0.687226	0	1	16601.9	LCE1E
27223	cg27285056	0.631173	-24.8223	24.8223	0.00329437	-0.0143415	6667.21	0.645514	0	1	6682.32	NAPSA
1995	cg01970325	0.599411	-24.7875	24.7875	0.00332085	-0.014753	6935.2	0.614164	0	1	7027.41	NELF
11459	cg11520395	0.707644	-24.7469	24.7469	0.00335202	-0.012942	20804.2	0.720586	0	1	20871.7	JMJD4
1566	cg01545079	0.909047	-24.7332	24.7332	0.00336265	-0.00682443	14325	0.915871	0	1	14316.5	CPNE6
10088	cg10169812	0.851709	-24.7293	24.7293	0.0033657	-0.00892639	4551.26	0.860636	0	1	4608.88	CD38
18093	cg18085435	0.738421	-24.7176	24.7176	0.0033747	-0.0122319	5201.45	0.750653	0	1	5199.83	ATP8B1
22656	cg22699362	0.672454	-24.7136	24.7136	0.00337786	-0.0136335	2398.58	0.686088	0	1	2426.02	FLJ10996
24025	cg24076830	0.754268	-24.7057	24.7057	0.00338396	-0.0118341	3552.36	0.766102	0	1	3610.68	OR5V1
20407	cg20444256	0.492465	-24.6904	24.6904	0.00339597	-0.0154662	12214.5	0.507931	0	1	12123.8	CKM
12018	cg12071073	0.836178	-24.6842	24.6842	0.00340081	-0.00943828	10087.2	0.845616	0	1	10257.8	CCDC70
13272	cg13338132	0.890387	-24.5876	24.5876	0.00347728	-0.00752109	10835	0.897908	0	1	10990.9	FAM71C
13850	cg13897449	0.687073	-24.5825	24.5825	0.00348134	-0.0133259	4336.7	0.700399	0	1	4397.65	PFKFB1
15733	cg15703357	0.700628	-24.5799	24.5799	0.00348346	-0.0130513	2432.59	0.713679	0	1	2471.01	LINCR
989	cg00951770	0.739068	-24.5486	24.5486	0.00350865	-0.01218	11427	0.751248	0	1	11547.3	RABGGTA
2186	cg02164046	0.128188	24.5313	24.5313	0.00352265	0.00969208	11315	0.118496	0	1	11432.8	SST
4391	cg04365980	0.776671	-24.5227	24.5227	0.00352967	-0.0112026	3958.93	0.787873	0	1	4000.92	CLEC3A
11447	cg11505080	0.286414	-24.5227	24.5227	0.00352967	-0.0138853	12137.3	0.300299	0	1	12353.7	GPR173
20521	cg20579480	0.566476	-24.507	24.507	0.00354241	-0.0150152	2596.53	0.581491	0	1	2604.36	APOBEC4
23303	cg23326197	0.551914	-24.507	24.507	0.00354241	-0.0151329	5343.81	0.567047	0	1	5368.55	CYP3A4
27342	cg27404050	0.695135	-24.507	24.507	0.00354241	-0.013146	2822.19	0.708281	0	1	2793.97	PRODH2
24903	cg24928687	0.851971	-24.4533	24.4533	0.00358649	-0.0088737	5831.07	0.860845	0	1	5898.81	EPHX1
3432	cg03406535	0.179038	24.4397	24.4397	0.00359773	0.0111839	7001.26	0.167854	0	1	7127.12	RBP7
8944	cg08999895	0.846674	-24.4397	24.4397	0.00359773	-0.00904977	10059.2	0.855724	0	1	10008.1	SLC22A18AS
10770	cg10874403	0.592687	-24.4397	24.4397	0.00359773	-0.014737	1700.06	0.607424	0	1	1720.27	POU1F1
8977	cg09034896	0.734534	-24.4124	24.4124	0.0036204	-0.0122574	17232.7	0.746791	0	1	17160.2	GRK1
20273	cg20312228	0.13057	24.3847	24.3847	0.00364361	0.00974143	24530.4	0.120828	0	1	24547.2	CCDC37
23622	cg23663653	0.82622	-24.3829	24.3829	0.00364508	-0.00970811	25067.9	0.835928	0	1	25212.1
24842	cg24879335	0.141557	24.3736	24.3736	0.00365291	0.0100815	8535.53	0.131475	0	1	8524.82	TF
6471	cg06493386	0.129238	24.3679	24.3679	0.00365768	0.00969534	18880.7	0.119542	0	1	18925.3	TRPA1
12110	cg12167564	0.485408	-24.3679	24.3679	0.00365768	-0.0153868	4904.03	0.500795	0	1	4878.44	LYST
20520	cg20576597	0.0836171	24.3547	24.3547	0.00366883	0.00815409	10818.2	0.075463	0	1	10992.9	C21orf29
465	cg00451635	0.611419	-24.3521	24.3521	0.00367104	-0.0144883	17126.6	0.625907	0	1	17195.7	EMP2
11476	cg11540692	0.183401	24.3309	24.3309	0.003689	0.0112794	25733	0.172122	0	1	25570.2	SIM1
23233	cg23260026	0.534775	-24.3201	24.3201	0.00369816	-0.0151936	9891.32	0.549968	0	1	9995.09	FSTL3
8366	cg08418332	0.613173	-24.2678	24.2678	0.00374303	-0.0144446	21300.6	0.627617	0	1	21319.4	CCL19
14727	cg14723032	0.625623	-24.2633	24.2633	0.00374692	-0.0142755	7544.12	0.639899	0	1	7588.29	PITPNM3
7436	cg07459489	0.749682	-24.2085	24.2085	0.00379442	-0.0118442	2835.84	0.761526	0	1	2884.57	SLC30A8
11928	cg11976616	0.717681	-24.2073	24.2073	0.00379549	-0.0125973	2831.06	0.730278	0	1	2865.69	C6
7377	cg07403255	0.654402	-24.2059	24.2059	0.00379675	-0.0138212	16564.6	0.668223	0	1	16664.7	PAX8
16300	cg16232126	0.110075	24.1715	24.1715	0.00382688	0.00903913	10312.6	0.101036	0	1	10562.8	SLC5A7
24381	cg24430616	0.709362	-24.1713	24.1713	0.00382708	-0.0127697	3244.42	0.722132	0	1	3245.01	ENTPD4
8066	cg08099701	0.718206	-24.1346	24.1346	0.00385962	-0.0125691	2480.39	0.730775	0	1	2534.74	GABRA5
12838	cg12891678	0.630679	-24.1303	24.1303	0.00386341	-0.0141695	20417.6	0.644849	0	1	20563.6	SPRR2D
19538	cg19546781	0.881473	-24.0897	24.0897	0.00389964	-0.00778049	22144	0.889253	0	1	22107.3	CCL17
12766	cg12815916	0.925978	-24.0638	24.0638	0.003923	-0.00607526	11615	0.932053	0	1	11677.3	PTPN18
26401	cg26417554	0.653211	24.0519	24.0519	0.00393382	0.0140243	6209.92	0.639187	0	1	6207.22	RPUSD3
21300	cg21312148	0.73562	-24.0373	24.0373	0.00394704	-0.0121486	4473.55	0.747769	0	1	4547.54	LCE2D
13082	cg13164537	0.511536	24.0055	24.0055	0.00397599	0.0152662	12536.2	0.49627	0	1	12638.7	CD226
2328	cg02288165	0.621229	-23.9733	23.9733	0.00400558	-0.0142623	3736.33	0.635491	0	1	3747.22	SN
15604	cg15590780	0.530347	-23.9656	23.9656	0.00401274	-0.0151225	3309.65	0.545469	0	1	3365	USH2A
5936	cg05942970	0.897095	-23.9598	23.9598	0.00401806	-0.00718546	15658	0.90428	0	1	15820.8	C10orf39
1389	cg01375871	0.577029	-23.942	23.942	0.0040346	-0.0147648	3985.75	0.591793	0	1	3957.04	TPSD1
21760	cg21765730	0.703284	-23.942	23.942	0.0040346	-0.0128449	2911.49	0.716129	0	1	2941.97	NOX3
8111	cg08145625	0.114529	23.9369	23.9369	0.00403933	0.00914746	8540.71	0.105382	0	1	8752.84	TRAM1L1
20355	cg20383064	0.794047	-23.8845	23.8845	0.00408838	-0.0105883	4146.49	0.804635	0	1	4213.64	BFSP2
21444	cg21460582	0.542003	-23.8777	23.8777	0.00409478	-0.0150283	6221.85	0.557031	0	1	6199.72	CSPG4
10300	cg10376763	0.839699	-23.8654	23.8654	0.00410639	-0.00918591	6184.97	0.848885	0	1	6315.53	TNP1
25185	cg25186143	0.133323	23.8357	23.8357	0.00413453	0.00973086	10655.9	0.123592	0	1	11103.5	FAM57A
26886	cg26917999	0.713748	-23.8342	23.8342	0.00413599	-0.0125979	23615.9	0.726346	0	1	23830.6	LZTS1
[truncated: 1,098 more rows]
