# Supplementary material for: Phenotypic Subtyping and Re-Analysis of Existing Methylation Data from Autistic Probands in Simplex Families Reveal ASD Subtype-Associated Differentially Methylated Genes and Biological Functions
Source: Int J Mol Sci. 2020 Sep 19;21(18):6877. doi: 10.3390/ijms21186877 (PMC7555936; doi:10.3390/ijms21186877)
Supplement: Supplementary file 1 [file ijms-21-06877-s001.zip › ijms-927106-supplementary/Suppl. Materials_revised MS/Table S5. Map of CpG sites in different subtypes.xlsx]

## Sheet: Language
CG ID	Chr	MapInfo	Distance_to_TSS	Symbol	CPG_ISLAND	CPG_ISLAND_LOCATIONS
cg23765993	20	43609443	1	SPINLW1	FALSE
cg11505080	X	53095229	2	GPR173	FALSE
cg14659547	3	109958816	4	RETNLB	FALSE
cg15799267	17	7883131	4	ALOX15B	FALSE
cg22407458	6	35217099	5	TCP11	TRUE	6:35216605-35217470
cg11880010	9	78518464	6	KIAA0367	FALSE
cg14893161	1	204085874	6	FLJ32569	TRUE	1:204085476-204086074
cg00684178	2	242400753	7	NEU4	FALSE										FMR1
cg24443136	X	152454781	7	ATP2B3	FALSE
cg12215675	6	167658584	8	TTLL2	FALSE
cg27398547	14	60022491	11	C14orf39	TRUE	14:60021580-60022823
cg24870391	17	29636788	12	CCL11	FALSE
cg02998425	14	69993957	13	ADAM21	FALSE
cg14076161	12	11354646	13	PRB4	FALSE
cg14959707	16	11783892	17	ZC3H7A	TRUE	16:11783829-11784227
cg08314660	11	384199	18	PKP3	TRUE	11:384143-384690
cg26521448	16	11783927	18	ZC3H7A	TRUE	16:11783829-11784227
cg26099316	3	52803834	20	ITIH3	FALSE
cg12653105	X	48915243	26	PLP2	TRUE	X:48914412-48916142
cg17901463	1	110031996	31	GSTM1	TRUE	1:110031594-110032306
cg13897627	16	47935998	32	FLJ44674	FALSE
cg10237469	19	46825249	33	CEACAM4	FALSE
cg08424423	6	31196167	35	CDSN	FALSE
cg10321723	1	144439119	36	PDZK1	FALSE
cg10248727	9	137553145	38	LCN1	FALSE
cg12439899	6	10523218	38	TFAP2A	TRUE	6:10519201-10524183
cg10409560	4	76700323	41	FLJ23657	FALSE
cg12799895	7	98084588	43	NPTX2	TRUE	7:98083575-98085970
cg05187322	17	75766923	47	CARD14	TRUE	17:75766640-75766949
cg00613255	11	2138952	48	INS	FALSE
cg23936476	X	102205776	48	BEX1	TRUE	X:102205198-102206059
cg11170796	19	1601224	53	TCF3	FALSE
cg19297688	9	5221360	59	INSL4	FALSE
cg05935584	X	149902481	60	HMGB3	TRUE	X:149901718-149904046
cg26624294	X	151749895	62	CETN2	TRUE	X:151749617-151750646
cg12619162	10	43187161	63	FXYD4	FALSE
cg17827767	10	85991134	63	LRRC21	FALSE
cg21604856	22	21204677	64	SUHW1	FALSE
cg24389347	3	127760383	65	C3orf22	FALSE
cg14159672	1	204085802	66	FLJ32569	TRUE	1:204085476-204086074
cg20781967	12	642949	67	NINJ2	FALSE
cg07123548	19	45588003	69	HIPK4	FALSE
cg09229960	X	153261050	69	EMD	TRUE	X:153259464-153261581
cg08822227	4	2790266	73	SH3BP2	TRUE	4:2789239-2790333
cg25042226	2	113753041	73	PAX8	TRUE	2:113752884-113753146
cg19062189	X	101658281	74	TMSL8	TRUE	X:101657504-101658520
cg21686987	16	73810474	75	CTRB1	FALSE
cg12564453	16	55553341	78	CETP	FALSE
cg26220985	1	166964973	79	DPT	FALSE
cg01429391	14	22974770	80	MYH7	FALSE
cg02205962	X	152643001	80	BCAP31	TRUE	X:152642005-152643632
cg21148892	2	70901157	83	CLEC4F	FALSE
cg26424956	6	34209504	83	GRM4	FALSE
cg03704031	X	70628940	84	INGX	TRUE	X:70628205-70629896
cg07581973	X	23595650	84	PRDX4	TRUE	X:23595198-23596007
cg19668234	3	46734453	85	TSP50	TRUE	3:46733944-46734676
cg07297906	X	132947244	88	GPC3	TRUE	X:132946499-132947763
cg11854877	X	153767738	91	F8A1	TRUE	X:153767233-153768860
cg14561282	4	176076043	91	ADAM29	FALSE
cg01333788	1	34993401	93	GJB5	FALSE
cg02601403	17	31616166	94	TBC1D3C	FALSE
cg03544320	4	5945592	94	CRMP1	TRUE	4:5944246-5946191
cg19305227	15	43331627	99	SLC28A2	TRUE	15:43331294-43331673
cg21601405	20	44180413	100	CD40	TRUE	20:44180138-44180422
cg14209518	11	113671846	101	NNMT	FALSE
cg05594230	X	70629128	104	INGX	TRUE	X:70628205-70629896
cg08815403	4	88463166	104	HSD17B13	FALSE
cg08365982	3	8750601	105	CAV3	TRUE	3:8750552-8750774
cg12864235	5	27074539	108	CDH9	FALSE
cg24494556	10	42454106	108	ZNF11B	TRUE	10:42453370-42454272
cg18328334	2	218516897	109	TNS1	FALSE
cg21909391	3	189378916	109	FLJ42393	FALSE
cg09638834	6	150388190	110	RAET1L	FALSE
cg10193817	11	114880436	111	IGSF4	TRUE	11:114880058-114881146
cg15452204	5	149526664	112	CDX1	TRUE	5:149526038-149527543
cg15554401	1	34999478	113	GJB4	TRUE	1:34999454-35000017
cg05221167	19	9470397	118	ZNF560	TRUE	19:9469758-9470740
cg10125195	12	53314812	118	LACRT	FALSE
cg15983005	17	36760464	118	KRTHA3A	FALSE
cg23278885	20	2309431	123	TGM6	FALSE
cg14533138	17	36779447	126	KRTHA3B	TRUE	17:36779251-36779455
cg14625604	X	118592653	126	UBE2A	TRUE	X:118591805-118593375
cg13894021	22	21817383	130	RAB36	TRUE	22:21817260-21818058
cg04567009	1	159867393	132	FCGR3B	FALSE
cg08431931	22	40724605	133	MGC26816	TRUE	22:40724449-40725364
cg09508556	6	31214961	136	PSORS1C2	FALSE
cg20022541	14	93455148	137	C14orf152	FALSE
cg00573606	2	237987419	140	COL6A3	FALSE
cg17829936	6	132952374	144	TAAR5	FALSE
cg01564343	6	41229898	150	TREML1	FALSE
cg03038672	16	3002057	150	CLDN9	FALSE
cg21930712	19	56452928	152	FLJ40235	FALSE
cg07126559	13	22652937	154	SGCG	FALSE
cg12286890	1	166779691	155	XCL2	FALSE
cg11706163	5	39400252	160	C9	FALSE
cg08191915	11	123986824	161	PANX3	FALSE
cg18507125	X	100532762	162	RPL36A	TRUE	X:100532246-100532948
cg08214029	17	31415591	165	CCL18	FALSE
cg25813820	X	153686792	165	MPP1	TRUE	X:153686380-153687406
cg08695223	X	134895459	166	SLC9A6	TRUE	X:134895007-134896000
cg14153740	7	141604179	168	TRY1	FALSE
cg19798224	14	99859262	170	C14orf68	FALSE
cg21518947	11	66979224	170	CABP4	FALSE
cg03140978	1	24600714	178	C1orf201	FALSE
cg09261262	10	88404534	180	OPN4	FALSE
cg26538442	16	65552448	191	FLJ21736	FALSE
cg20540913	X	68752833	197	EDA	TRUE	X:68752319-68753914
cg20504202	X	54483777	199	RP1-112K5.2	TRUE	X:54483309-54483784
cg04453065	1	85819249	201	CYR61	TRUE	1:85818356-85819916
cg09923855	X	135407132	205	HTATSF1	TRUE	X:135406317-135407906
cg24423088	21	31107236	205	KRTAP8-1	FALSE
cg08430598	20	23679367	207	CST1	FALSE
cg07895149	10	105202273	208	FAM26B	TRUE	10:105201921-105202424
cg03991512	16	73707957	209	LDHD	FALSE
cg10051054	1	3659032	210	CCDC27	FALSE
cg07092725	14	62638549	212	KCNH5	TRUE	14:62638333-62638701
cg19196684	1	53380625	212	SLC1A7	FALSE
cg01091565	15	88095766	214	MESP1	FALSE
cg25545210	17	36791943	219	KRTHA4	FALSE
cg24824840	19	55911787	220	SHANK1	TRUE	19:55911787-55912150
cg00079563	22	41583465	221	ARFGAP3	TRUE	22:41582136-41584116
cg03270204	6	30959617	223	DDR1	FALSE
cg13156121	16	56567615	225	TEPP	FALSE
cg23629496	20	5982446	230	C20orf75	FALSE
cg24346637	1	110456815	230	UBL4B	FALSE
cg18780401	X	48700069	232	OTUD5	TRUE	X:48699066-48701313
cg06356454	2	241280171	236	AQP12A	TRUE	2:241279986-241280188
cg05556717	7	75257240	240	CCL26	FALSE
cg02876062	10	14856660	242	FAM107B	TRUE	10:14856124-14856711
cg16080552	1	58815787	246	TACSTD2	TRUE	1:58814224-58815985
cg03887787	11	65404108	248	CTSW	FALSE
cg17977362	2	240165186	254	FLJ45964	FALSE
cg03364781	4	113518042	259	ALPK1	FALSE
cg23137254	20	55400138	268	RNPC1	TRUE	20:55398801-55400873
cg08434396	X	146801470	269	FMR1	TRUE	X:146800548-146802079
cg26353877	1	157824510	270	APCS	FALSE
cg18152830	17	16815854	273	TNFRSF13B	FALSE
cg02992596	4	155921670	280	MGC27016	TRUE	4:155921599-155922908
cg07327347	16	25135505	281	AQP8	FALSE
cg00830029	12	2814163	287	NRIP2	FALSE
cg13286902	X	100193436	290	CXorf34	TRUE	X:100193151-100193925
cg05194726	12	2814741	291	NRIP2	FALSE
cg14547335	3	10466247	299	ATP2B2	TRUE	3:10466013-10466250
cg19055231	3	36397401	300	STAC	TRUE	3:36396655-36397610
cg11233153	X	153371885	304	SLC10A3	TRUE	X:153371721-153373120
cg27153400	19	60665132	308	ISOC2	TRUE	19:60663873-60665412
cg21964481	9	139245517	311	SLC34A3	FALSE
cg18557145	9	35608083	325	CD72	FALSE
cg04415689	2	241776923	326	TMEM16G	FALSE
cg14324838	20	34164089	327	EPB41L1	FALSE
cg16474696	19	13736014	332	MGC3207	TRUE	19:13735898-13737102
cg13928961	12	51298276	334	K6IRS3	FALSE
cg21770617	3	58627937	336	FAM3D	FALSE
cg25661884	19	9985267	342	RDH8	FALSE
cg09144786	X	117363720	350	WDR44	TRUE	X:117363449-117364996
cg14173969	17	70053527	350	CD300C	FALSE
cg21111471	11	63627576	362	FLRT1	FALSE
cg15756091	1	180686278	363	RGSL2	FALSE
cg07440877	13	23421079	375	FLJ46358	FALSE
cg24928161	17	7473840	376	SHBG	FALSE
cg23067535	8	124264314	381	FAM83A	FALSE
cg25242557	11	31789840	385	PAX6	TRUE	11:31789223-31789894
cg25933726	X	38071343	389	RPGR	TRUE	X:38070900-38072122
cg18008766	2	38832400	395	SFRS7	TRUE	2:38830946-38832545
cg22189286	12	118100576	402	HSPB8	FALSE
cg11474811	11	2400445	406	TRPM5	FALSE
cg03842617	7	150319489	409	NOS3	FALSE
cg10876928	20	43410887	409	SDC4	FALSE
cg11235426	6	237522	421	DUSP22	TRUE	6:236809-238025
cg04384208	1	159786020	422	FCGR3A	FALSE
cg19561186	3	110155735	425	GUCA1C	FALSE
cg06862644	17	3322219	429	SPATA22	TRUE	17:3321498-3322570
cg09920632	X	54087466	430	PHF8	TRUE	X:54086783-54088233
cg11037772	1	144322677	436	POLR3C	TRUE	1:144321844-144323035
cg14615807	1	55236761	444	BSND	FALSE
cg27495908	9	89688043	451	C9orf79	FALSE
cg05949660	6	109884335	452	MICAL1	TRUE	6:109882585-109884615
cg07455279	19	59297515	457	NDUFA3	TRUE	19:59296606-59298627
cg04797496	5	141319270	459	PCDH12	FALSE
cg09419670	9	122645487	460	PSMD5	TRUE	9:122644694-122645875
cg00174500	14	22916319	462	CMTM5	FALSE
cg02164442	16	31312602	468	ITGAD	FALSE
cg07175007	1	160733809	470	UHMK1	TRUE	1:160733672-160733903
cg21697779	X	153908728	470	FUNDC2	TRUE	X:153907991-153908993
cg16483466	20	31134895	479	C20orf186	TRUE	20:31134869-31135091
cg00729708	15	98901965	483	LASS3	TRUE	15:98901825-98902776
cg10756887	22	22435692	484	C22orf15	TRUE	22:22435485-22436065
cg21860846	X	47395451	487	ELK1	TRUE	X:47394182-47395634
cg23264413	19	48402117	487	PSG4	FALSE
cg01939428	7	156623931	494	UBE3C	TRUE	7:156623773-156625371
cg04256470	1	10433052	494	CORT	TRUE	1:10432949-10433150
cg19584957	1	1104442	498	TTLL10	TRUE	1:1104363-1104588
cg02311163	20	43283925	501	SEMG2	FALSE
cg08693325	X	114430074	503	LUZP4	TRUE	X:114429798-114430105
cg27087809	15	76314465	511	ACSBG1	FALSE
cg22038738	8	42183830	521	PLAT	FALSE
cg08159444	X	151910885	529	PNMA5	FALSE
cg09309269	17	27795074	541	PSMD11	TRUE	17:27794936-27796580
cg02635407	4	8251449	545	SH3TC1	TRUE	4:8251394-8251604
cg09354331	10	80631388	551	RAI17	FALSE
cg10365880	10	102079671	562	PKD2L1	FALSE
cg23767977	12	51233732	562	KRT6IRS	FALSE
cg24396745	15	71447667	563	HCN4	TRUE	15:71446780-71449188
cg26394940	22	44828125	563	FLJ10945	TRUE	22:44827763-44828229
cg05517711	9	129702272	580	ST6GALNAC6	TRUE	9:129702258-129702529
cg12572545	4	166467669	599	SC4MOL	TRUE	4:166467415-166468695
cg14209870	7	141135863	623	TAS2R5	FALSE
cg08109646	1	26571221	632	ZNF683	FALSE
cg09863066	22	35544810	653	PVALB	FALSE
cg21633698	11	118799744	654	THY1	FALSE
cg22552966	17	19561187	672	FLJ31196	FALSE
cg22021786	20	43640702	677	WFDC8	FALSE
cg16825000	1	20122017	680	PLA2G2E	FALSE
cg21717724	9	122644335	692	PSMD5	TRUE	9:122644137-122644399
cg19055639	X	100800794	697	ARMCX2	TRUE	X:100800529-100800899
cg11024597	2	106047843	702	ECRG4	FALSE
cg07207789	16	83410410	703	CRISPLD2	TRUE	16:83410061-83411399
cg24340926	X	129132717	737	RAB33A	TRUE	X:129132596-129134255
cg09936839	19	4132854	742	SIRT6	TRUE	19:4132627-4132893
cg27412093	1	228949010	743	CAPN9	FALSE
cg15916061	6	25862198	747	SLC17A4	FALSE
cg27105123	19	60274447	753	EPS8L1	FALSE
cg21627181	6	25862169	776	SLC17A4	FALSE
cg13434852	10	128658171	784	DOCK1	FALSE
cg22427279	1	116186057	787	NHLH2	FALSE
cg05208153	9	34388637	788	C9orf24	FALSE
cg04126866	10	85922743	804	C10orf99	FALSE
cg17703324	1	201729088	806	OPTC	FALSE
cg13300756	19	56919850	817	HAS1	TRUE	19:56919725-56919930
cg02658251	8	7788776	833	DEFB4	FALSE
cg25193494	16	88543505	853	FLJ20186	TRUE	16:88541730-88543707
cg19560971	11	118723448	868	MFRP	FALSE
cg18059933	8	96031639	872	TP53INP1	TRUE	8:96029735-96031710
cg21367957	13	112824253	893	F10	FALSE
cg25011395	17	7775332	930	CNTROB	TRUE	17:7775260-7775583
cg17391877	6	41822160	939	PGC	FALSE
cg03704393	9	96081822	961	ZNF169	FALSE
cg21307628	3	113843642	975	URB	FALSE
cg13266631	8	24870923	977	NEFL	TRUE	8:24870759-24871396
cg19109431	6	44342489	986	NFKBIE	FALSE
cg14162076	12	8556359	1044	CLEC4D	TRUE	12:8556211-8556415
cg12687463	1	195054473	1048	CFHR1	FALSE
cg24499411	7	47546772	1048	TNS3	TRUE	7:47546572-47546780
cg17706173	16	1522582	1077	C16orf30	FALSE
cg10198837	2	86943713	1164	CD8B1	FALSE
cg04721098	16	24173204	1173	CACNG3	FALSE
cg12869058	1	94360460	1193	ABCA4	FALSE
cg12878228	7	142135698	1206	PRSS1	FALSE
cg18535534	X	128943139	1211	BCORL1	TRUE	X:128941358-128946562
cg25527547	7	100649020	1289	PLOD3	FALSE
cg16112945	9	135275627	1314	ADAMTS13	FALSE
cg07039113	1	151595637	1317	S100A9	FALSE
cg16899306	6	32840563	1318	HLA-DQB2	FALSE
cg11494699	11	36544793	1346	RAG1	FALSE
cg14375111	3	14140187	1359	TMEM43	FALSE
cg00660989	14	44502266	1366	BTBD5	FALSE
cg15595739	17	60613913	1371	RGS9	FALSE
cg01145396	2	233111307	1374	CHRNG	FALSE
cg03993463	21	38549141	1393	KCNJ15	FALSE
cg00226923	6	37080005	1396	FGD2	FALSE
cg03287877	17	40495352	1440	DCAKD	FALSE
cg18508525	7	80067998	1461	CD36	FALSE
cg20664247	1	2335335	1465	PEX10	TRUE	1:2335193-2335428
cg13255629	4	88971684	1478	MEPE	FALSE
cg26647600	3	39344724	1495	CCR8	FALSE
cg01530101	11	2847674		KCNQ1DN	TRUE	11:2846828-2848015
cg02168291	16	81229021		CDH13	TRUE	16:81228442-81229032
cg12949760	11	2499438		KCNQ1	TRUE	11:2498865-2499473
cg13550608	3	50289658		SEMA3B	TRUE	3:50287560-50290055
cg16698623	10	131302958		MGMT	TRUE	10:131302456-131302963
cg23545272	X	67966338		EFNB1	TRUE	X:67965268-67967122
cg26750319	11	2550536		KCNQ1	TRUE	11:2550370-2550883
cg26808784	11	1974059		H19	TRUE	11:1973888-1974871

## Sheet: Intermediate
CG ID	Chr	MapInfo	Distance_to_TSS	Symbol	CPG_ISLAND	CPG_ISLAND_LOCATIONS
cg05912121	11	2149610	1	TH	FALSE
cg21902327	12	4425047	6	FGF6	TRUE	12:4425015-4425387
cg24443136	X	152454781	7	ATP2B3	FALSE
cg04613080	X	150653867	7	CNGA2	FALSE
cg01413516	19	17793328	8	INSL3	TRUE	19:17792758-17793397
cg12215675	6	167658584	8	TTLL2	FALSE
cg12728629	X	151673029	9	MAGEA2	TRUE	X:151672876-151673193
cg23984130	2	88996300	9		FALSE
cg25214346	1	159474590	11	NR1I3	FALSE
cg24870391	17	29636788	12	CCL11	FALSE
cg24607535	20	57966890	13	CDH26	FALSE
cg21631754	19	50429325	16	XTP7	TRUE	19:50428897-50430587
cg08314660	11	384199	18	PKP3	TRUE	11:384143-384690
cg26521448	16	11783927	18	ZC3H7A	TRUE	16:11783829-11784227
cg25734864	13	112860987	18	PROZ	FALSE
cg24323726	3	112796876	20	ZBED2	FALSE
cg25081201	10	43187077	21	FXYD4	FALSE
cg00587613	11	66976799	23	GPR152	FALSE
cg20931907	X	51166482	25	LOC340602	TRUE	X:51166104-51167780
cg21578906	22	30981345	27	SLC5A4	FALSE
cg19560210	1	228579960	30	PGBD5	FALSE
cg17901463	1	110031996	31	GSTM1	TRUE	1:110031594-110032306
cg12343082	16	86527646	33	CA5A	FALSE
cg10237469	19	46825249	33	CEACAM4	FALSE
cg26609631	13	27264814	34	GSH1	TRUE	13:27263400-27265360
cg08424423	6	31196167	35	CDSN	FALSE
cg04037228	3	45611390	35	LIMD1	FALSE
cg13349425	5	134810974	37	C5orf20	FALSE
cg05322019	10	102722313	37	SEMA4G	FALSE
cg04180460	3	41215966	38	CTNNB1	TRUE	3:41215077-41216769
cg27360098	7	73080416	38	ELN	TRUE	7:73080116-73080605
cg12439899	6	10523218	38	TFAP2A	TRUE	6:10519201-10524183
cg11675413	13	97627483	39	RNF113B	TRUE	13:97626465-97627827
cg17894008	17	57023386	41	NACAL	TRUE	17:57023173-57023543
cg10409560	4	76700323	41	FLJ23657	FALSE
cg00412805	3	42701974	41	KBTBD5	FALSE
cg22077553	1	169888355	41	MYOC	FALSE
cg17703554	8	88955455	43	WDR21C	TRUE	8:88954770-88955987
cg05700681	16	55950265	46	CCL22	FALSE
cg19504245	19	60352432	46	TNNT1	FALSE
cg27513764	17	57811693	47	EFCAB3	FALSE
cg12493160	9	70818777	51	PRKACG	TRUE	9:70817795-70819115
cg24789424	3	198784540	51	BDH	FALSE
cg22459359	1	35269872	53	ZMYM6	TRUE	1:35269639-35270315
cg25995460	1	22836743	56	C1QA	FALSE
cg00239071	14	99859490	58	C14orf68	FALSE
cg17399166	1	156416419	58	CD1D	FALSE
cg05590257	17	17050295	62	LOC201164	TRUE	17:17049380-17050976
cg12619162	10	43187161	63	FXYD4	FALSE
cg21604856	22	21204677	64	SUHW1	FALSE
cg27132814	20	18742303	67	C20orf79	FALSE
cg16666160	9	126309452	68	NR5A1	TRUE	9:126309430-126309676
cg17501569	16	751065	69	MSLN	TRUE	16:750966-751193
cg12485992	17	3321721	69	SPATA22	TRUE	17:3321498-3322570
cg25042226	2	113753041	73	PAX8	TRUE	2:113752884-113753146
cg17542495	X	70359726	75	GJB1	TRUE	X:70359536-70359838
cg03399459	10	47217088	75	ANXA8	FALSE
cg21686987	16	73810474	75	CTRB1	FALSE
cg06190732	14	94148389	78	SERPINA3	FALSE
cg00718513	2	88996387	78		FALSE
cg05156613	9	110657950	81	ACTL7B	TRUE	9:110657001-110657997
cg10591659	X	41191712	81	NYX	FALSE
cg27519424	21	37284290	83	HLCS	TRUE	21:37283461-37285036
cg03704031	X	70628940	84	INGX	TRUE	X:70628205-70629896
cg14934821	9	138348641	85	GPSM1	TRUE	9:138348614-138348948
cg06589885	1	144124550	85	HFE2	FALSE
cg25651984	X	140819258	88	MAGEC1	TRUE	X:140819187-140819447
cg08816023	5	142045723	89	FGF1	FALSE
cg08906015	19	51849665	89	MGC15476	FALSE
cg23812886	X	47941234	91	SSX5	TRUE	X:47941128-47941340
cg18740800	11	27871510	91	HSPCAL3	FALSE
cg23324787	11	36576270	92	RAG2	FALSE
cg07125166	3	48388617	96	FBXW12	FALSE
cg18448480	15	20806779	96	FLJ35785	FALSE
cg11706111	16	70080645	97	ZNF19	TRUE	16:70080524-70081125
cg11692021	12	6819733	97	GNB3	FALSE
cg14473924	3	73756860	98	PDZRN3	TRUE	3:73755774-73757236
cg24908058	19	54239014	100	CGB5	FALSE
cg14366490	19	17432825	100	TXNL6	FALSE
cg09256683	17	31337750	102	CCL14	FALSE
cg23773532	12	12994483	102	GPRC5D	FALSE
cg14792155	15	40076910	102	PLA2G4E	FALSE
cg05921324	11	116199324	103	APOA4	FALSE
cg06388544	1	25471465	103	RHD	FALSE
cg08815403	4	88463166	104	HSD17B13	FALSE
cg08365982	3	8750601	105	CAV3	TRUE	3:8750552-8750774
cg07443748	22	15453594	106	CESK1	FALSE
cg21660130	1	16242830	109	CLCNKB	FALSE
cg22802439	19	40849665	110	UPK1A	FALSE
cg15720064	X	12972754	112	FAM9C	TRUE	X:12972541-12972795
cg03923277	12	102883862	115	TDG	TRUE	12:102883345-102884290
cg22022041	3	45903141	118	CCR9	FALSE
cg15983005	17	36760464	118	KRTHA3A	FALSE
cg00042156	10	42290848	119	MGC16291	FALSE
cg19394737	2	219600605	122	DKFZp434O0527	TRUE	2:219600581-219600781
cg15550350	3	142979858	125	GRK7	TRUE	3:142979763-142980161
cg04810997	7	142850796	128	TAS2R60	FALSE
cg14256699	17	39191552	130	SOST	TRUE	17:39191384-39191613
cg08431931	22	40724605	133	MGC26816	TRUE	22:40724449-40725364
cg13649728	4	128871157	133	SLC25A31	TRUE	4:128870686-128871573
cg20226764	6	33879909	138	MLN	FALSE
cg23595927	4	661851	140	MYL5	TRUE	4:661751-662107
cg06940107	21	28833654	143	C21orf100	FALSE
cg03099771	6	27323344	143	PRSS16	FALSE
cg15974053	19	54031601	145	DHRS10	TRUE	19:54031203-54031666
cg05766474	17	31332781	145	CCL16	FALSE
cg15798153	7	90176797	149	PFTK1	FALSE
cg03038672	16	3002057	150	CLDN9	FALSE
cg26924825	16	66535366	150	LCAT	FALSE
cg20688340	10	127454227	153	MMP21	TRUE	10:127454134-127454336
cg21591452	17	76919223	154	TMEM105	TRUE	17:76919186-76919387
cg06954481	2	236741236	155	GBX2	TRUE	2:236740341-236743648
cg10545682	1	149779249	156	TUFT1	TRUE	1:149779125-149780093
cg07595943	16	82782402	157	LOC161931	TRUE	16:82781939-82782678
cg24477636	19	15780005	158	OR10H1	FALSE
cg13656062	19	15869723	161	CYP4F2	FALSE
cg05740244	11	18390591	162	LDHC	TRUE	11:18389965-18390649
cg11721194	1	158975863	162	SLAMF7	FALSE
cg24919884	1	3370148	166	ARHGEF16	FALSE
cg19857541	3	110319490	168	MORC1	TRUE	3:110319373-110319935
cg03998348	15	36014577	172	TMCO5	FALSE
cg20664201	12	56135537	174	INHBE	FALSE
cg09205751	11	268394	176	NALP6	FALSE
cg26738010	18	570188	179	CETN1	TRUE	18:570046-571049
cg09261262	10	88404534	180	OPN4	FALSE
cg25575065	22	49413260	182	ARSA	TRUE	22:49412641-49414443
cg08634464	19	2852147	183	LOC126295	TRUE	19:2850141-2853207
cg03557698	1	55044509	185	C1orf177	TRUE	1:55044094-55044620
cg24775607	16	1069058	188	SSTR5	TRUE	16:1068532-1070086
cg06917325	11	62539699	188	SLC22A8	FALSE
cg11291200	X	30143411	190	MAGEB2	TRUE	X:30143315-30143806
cg04968426	15	38908003	196	PPP1R14D	FALSE
cg21985470	1	153538047	198	PKLR	FALSE
cg09207718	15	72828439	202	CYP1A2	FALSE
cg13500819	5	138753299	202	PACAP	FALSE
cg22980351	X	125514720	205	WDR40B	TRUE	X:125513074-125514769
cg24423088	21	31107236	205	KRTAP8-1	FALSE
cg08430598	20	23679367	207	CST1	FALSE
cg07895149	10	105202273	208	FAM26B	TRUE	10:105201921-105202424
cg19553721	17	18370676	209	FAM106A	FALSE
cg22068211	3	129777831	212	C3orf27	FALSE
cg00730260	12	24628155	214	FLJ32894	FALSE
cg24027679	1	9009208	217	SLC2A7	FALSE
cg03270204	6	30959617	223	DDR1	FALSE
cg11884243	9	136912707	228	FCN2	TRUE	9:136912687-136912888
cg22642718	17	21259430	228	KCNJ12	TRUE	17:21259142-21260782
cg15464148	12	6615318	230	GPR92	FALSE
cg24307225	16	56789051	232	CSNK2A2	TRUE	16:56788707-56789907
cg13694749	17	59403770	240	SCN4A	TRUE	17:59403667-59403892
cg08356693	1	159121824	240	ITLN1	FALSE
cg18241647	20	43186761	241	WFDC12	FALSE
cg02876062	10	14856660	242	FAM107B	TRUE	10:14856124-14856711
cg17687883	2	74278975	245	MTHFD2	TRUE	2:74278849-74280363
cg16080552	1	58815787	246	TACSTD2	TRUE	1:58814224-58815985
cg16175725	12	119901179	247	TCF1	TRUE	12:119901088-119901290
cg07747299	21	46428480	249	C21orf56	TRUE	21:46428476-46428709
cg11768416	12	89872828	256	C12orf12	TRUE	12:89871840-89872935
cg11003133	1	157313015	256	AIM2	FALSE
cg02500392	6	138581065	256	PBOV1	FALSE
cg26583078	4	187114772	256	SORBS2	FALSE
cg05823029	13	113360759	257	ATP4B	FALSE
cg01671881	20	31268562	257	C20orf71	FALSE
cg20256783	12	51114114	259	K6HF	FALSE
cg07711097	8	143912956	263	GML	FALSE
cg18434152	1	110795047	264	PROK1	FALSE
cg03649060	19	11526451	270	ELOF1	FALSE
cg18152830	17	16815854	273	TNFRSF13B	FALSE
cg23815000	9	137552833	274	LCN1	FALSE
cg04740359	12	5473803	276	NTF3	TRUE	12:5473723-5474332
cg12376406	14	20306146	280	FAM12B	FALSE
cg07327347	16	25135505	281	AQP8	FALSE
cg22289115	11	615796	282	MUCDHL	FALSE
cg21489722	X	8961881	287	FAM9B	TRUE	X:8961772-8961973
cg15439078	3	46879647	288	MYL3	FALSE
cg05221264	1	15656100	289	ELA2A	FALSE
cg15149645	16	28458120	289	P8	FALSE
cg23625458	1	19472728	294	AFAR3	TRUE	1:19472685-19473594
cg01423840	X	150634869	295	FATE1	FALSE
cg16431978	21	30719803	298	KRTAP13-3	FALSE
cg14547335	3	10466247	299	ATP2B2	TRUE	3:10466013-10466250
cg21970438	6	167658267	309	TTLL2	FALSE
cg21964481	9	139245517	311	SLC34A3	FALSE
cg10938286	20	23754999	313	CST2	FALSE
cg17788013	5	147423445	314	SPINK5	FALSE
cg10207745	12	13421230	318	C12orf36	FALSE
cg05997860	14	69993648	322	ADAM21	FALSE
cg19420968	1	31857551	323	HCRTR1	FALSE
cg06189133	19	17792995	325	INSL3	TRUE	19:17792758-17793397
cg04929865	X	152413272	333	BGN	FALSE
cg07220939	11	64115193	335	SLC22A12	TRUE	11:64115128-64115334
cg21453309	12	123340008	345	FAM101A	FALSE
cg19812619	12	51886921	346	ITGB7	FALSE
cg08402568	16	69238318	349	MGC34647	FALSE
cg12339802	1	37929132	353	C1orf109	TRUE	1:37927759-37929146
cg09027725	20	29689707	355	COX4I2	FALSE
cg20483763	11	66979750	356	CABP4	TRUE	11:66979612-66979858
cg22627427	11	61279074	363	C11orf9	FALSE
cg15113803	3	130729809	363	RHO	FALSE
cg14774175	X	30158839	365	MAGEB3	FALSE
cg19481052	X	102918793	383	PLP1	FALSE
cg23401756	16	66571482	385	DPEP3	TRUE	16:66571413-66572132
cg08612871	1	34992921	387	GJB5	FALSE
cg05731779	5	72499443	387	MGC13034	FALSE
cg11761535	3	150533721	388	TM4SF18	FALSE
cg04001668	16	56211848	389	GPR56	TRUE	16:56211784-56212012
cg27342801	2	79240781	394	REG3A	FALSE
cg06811800	13	113360106	396	ATP4B	TRUE	13:113359799-113360176
cg13705284	3	58498353	397	ACOX2	FALSE
cg11267879	19	46311792	401	CYP2F1	FALSE
cg25461905	1	176748430	403	C1orf49	TRUE	1:176748401-176748686
cg03665605	7	98902148	404	ATP5J2	TRUE	7:98901645-98903300
cg20281815	8	143758510	405	PSCA	FALSE
cg09722555	9	34652282	407	CCL27	FALSE
cg19465374	7	99411214	409	AZGP1	FALSE
cg16462075	7	100382156	409	MUC3B	FALSE
cg03842617	7	150319489	409	NOS3	FALSE
cg06690548	4	139382258	415	SLC7A11	TRUE	4:139382255-139382463
cg23749046	1	109884447	415	GPR61	FALSE
cg19859270	3	99733984	416	GPR15	FALSE
cg01897036	2	119998797	419	SCTR	TRUE	2:119997791-119998904
cg18023724	4	164307943	420	LOC92345	TRUE	4:164306691-164308033
cg07364841	4	3413945	421	HGFAC	FALSE
cg05985767	15	88150515	423	ANPEP	TRUE	15:88150397-88150795
cg23753610	17	74079425	426	DNAHL1	FALSE
cg06862644	17	3322219	429	SPATA22	TRUE	17:3321498-3322570
cg20500126	17	3661007	429	ITGAE	FALSE
cg18389810	14	20568727	431	C14orf8	TRUE	14:20568722-20568923
cg24216701	5	149526121	431	CDX1	TRUE	5:149526038-149527543
cg18838701	19	60360424	434	TNNI3	FALSE
cg24995836	X	151370046	440	GABRA3	FALSE
cg02237119	7	72894350	441	WBSCR27	FALSE
cg01909245	11	1830333	443	LSP1	FALSE
cg25569462	4	189263854	452	FLJ25801	FALSE
cg05810550	8	7330861	458	DEFB106A	FALSE
cg04797496	5	141319270	459	PCDH12	FALSE
cg06256735	12	8707161	461	MFAP5	FALSE
cg00174500	14	22916319	462	CMTM5	FALSE
cg08642068	20	31055437	463	SPAG4L	FALSE
cg01040850	1	179269292	470	MR1	FALSE
cg10883352	3	144378065	471		TRUE	3:144377941-144378214
cg10157098	7	128142203	476	NYD-SP18	FALSE
cg16483466	20	31134895	479	C20orf186	TRUE	20:31134869-31135091
cg00729708	15	98901965	483	LASS3	TRUE	15:98901825-98902776
cg09737668	1	158190149	485	SLAMF9	FALSE
cg05564657	3	153014065	486	AADAC	FALSE
cg04256470	1	10433052	494	CORT	TRUE	1:10432949-10433150
cg19584957	1	1104442	498	TTLL10	TRUE	1:1104363-1104588
cg07792737	16	14938303	498	NPIP	FALSE
cg02311163	20	43283925	501	SEMG2	FALSE
cg14804557	14	105210636	502		FALSE
cg06210526	19	46311690	503	CYP2F1	FALSE
cg12346881	5	150264078	506	ZNF300	FALSE
cg13350783	17	36914880	511	KRT13	FALSE
cg01668126	8	16095111	516	MSR1	FALSE
cg22038738	8	42183830	521	PLAT	FALSE
cg18241160	1	1645098	525	CDC2L2	TRUE	1:1644546-1646532
cg25659818	17	31455860	527	CCL4	FALSE
cg14182690	1	25163534	528	RUNX3	TRUE	1:25163450-25163764
cg22637941	8	134273023	529	WISP1	TRUE	8:134272943-134273143
cg08159444	X	151910885	529	PNMA5	FALSE
cg21575929	5	159276859	541	ADRA1B	TRUE	5:159276719-159277117
cg03251857	9	133154401	544	PPAPDC3	TRUE	9:133154263-133154511
cg05190718	1	116112235	558	CASQ2	FALSE
cg21033494	10	51220120	561	MSMB	FALSE
cg23767977	12	51233732	562	KRT6IRS	FALSE
cg10365880	10	102079671	562	PKD2L1	FALSE
cg12188860	8	144487860	565	TOP1MT	TRUE	8:144487548-144488685
cg11161417	17	28343567	572	SPACA3	FALSE
cg24613957	1	20123271	574	PLA2G2E	FALSE
cg03883519	4	129105974	580	MGC33302	TRUE	4:129104666-129106616
cg08268099	9	137106405	587	OLFM1	FALSE
cg20154346	X	17731018	590	RAI2	FALSE
cg18771300	14	62741490	592	RHOJ	TRUE	14:62741321-62741574
cg23660082	20	23680166	592	CST1	FALSE
cg24298280	6	125346807	594	IBRDC1	FALSE
cg03776850	16	1246873	599	TPSD1	TRUE	16:1246867-1247074
cg19944367	9	115263596	604	RGS3	FALSE
cg14847483	15	32303932	605	TMEM85	FALSE
cg27341860	1	246166503	613	OR2L13	TRUE	1:246166364-246166628
cg19297232	16	67040522	617	SMPD3	TRUE	16:67039271-67040730
cg22889448	19	6837962	620	EMR1	FALSE
cg01545079	14	23611217	621	CPNE6	FALSE
cg02274362	X	151992153	632	PNMA6A	TRUE	X:151990675-151993000
cg08109646	1	26571221	632	ZNF683	FALSE
cg18140857	8	57396428	633	RDHE2	TRUE	8:57396265-57396478
cg02883621	4	6745824	643	S100P	FALSE
cg08901867	17	44226041	644	TTLL6	TRUE	17:44225747-44226049
cg01237132	20	23755958	646	CST2	FALSE
cg00280814	22	22075389	647	FLJ31568	FALSE
cg04435377	22	22074094	648	FLJ31568	FALSE
cg08321330	16	1220835	649	TPSB2	FALSE
cg21633698	11	118799744	654	THY1	FALSE
cg26267310	19	54032405	659	DHRS10	TRUE	19:54032130-54032682
cg27622610	17	2976935	660	OR1G1	FALSE
cg13315147	10	135191518	661	CYP2E1	TRUE	10:135191138-135192648
cg20277670	5	175042981	663	HRH2	TRUE	5:175042830-175043075
cg22552966	17	19561187	672	FLJ31196	FALSE
cg22021786	20	43640702	677	WFDC8	FALSE
cg18939260	8	125810527	687	MTSS1	TRUE	8:125809049-125810637
cg21717724	9	122644335	692	PSMD5	TRUE	9:122644137-122644399
cg13733733	19	59495352	698	LILRA3	FALSE
cg21450627	2	113647311	720	PSD4	FALSE
cg27412093	1	228949010	743	CAPN9	FALSE
cg15916061	6	25862198	747	SLC17A4	FALSE
cg19250907	8	68821882	748	CPA6	FALSE
cg04517429	4	155633068	750	DCHS2	TRUE	4:155632296-155633257
cg09532664	5	9684216	753	TAS2R1	FALSE
cg10500909	8	143997017	756	CYP11B2	FALSE
cg13795840	19	1225794	757	C19orf24	TRUE	19:1225395-1227695
cg13877895	2	69054513	758	GKN1	FALSE
cg15129294	17	31663387	760	CCL4L2	FALSE
cg07432969	2	241218230	762	GPR35	TRUE	2:241218177-241218615
cg08878744	1	151050298	773	LCE1B	FALSE
cg21627181	6	25862169	776	SLC17A4	FALSE
cg05208153	9	34388637	788	C9orf24	FALSE
cg13088755	X	78086697	788	P2RY10	FALSE
cg17217677	16	67040695	790	SMPD3	TRUE	16:67039271-67040730
cg18450227	18	46444635	799	MAPK4	TRUE	18:46444299-46444864
cg17703324	1	201729088	806	OPTC	FALSE
cg15317267	11	1974823	818	H19	TRUE	11:1973888-1974871
cg11828089	7	71516057	818	CALN1	FALSE
cg14141399	19	56919860	827	HAS1	TRUE	19:56919725-56919930
cg13145013	11	1974781	860	H19	TRUE	11:1973888-1974871
cg06736444	16	2741794	861	SRRM2	TRUE	16:2741471-2743551
cg12133004	12	47162427	863	C12orf54	FALSE
cg10296238	21	46429602	873	C21orf56	TRUE	21:46429326-46429616
cg01708964	7	44148316	875	MYL7	FALSE
cg14896003	11	552366	916	RASSF7	FALSE
cg19391527	8	28229651	917	PNOC	FALSE
cg21307628	3	113843642	975	URB	FALSE
cg13266631	8	24870923	977	NEFL	TRUE	8:24870759-24871396
cg21400896	17	44643568	980	ABI3	FALSE
cg07297178	19	46884924	988	CEACAM7	FALSE
cg17470143	13	35604433	990	DCAMKL1	FALSE
cg21596858	1	153273878	997	DCST2	FALSE
cg06849227	17	58953426	1001	KCNH6	TRUE	17:58953345-58953593
cg03128832	22	34442848	1017	APOL5	FALSE
cg12397274	6	54280142	1020	TINAG	FALSE
cg09440243	9	9009757	1022	PTPRD	FALSE
cg10246520	13	52499945	1028	OLFM4	FALSE
cg03003745	19	47640007	1031	UNQ473	FALSE
cg20082641	15	67377309	1039	PAQR5	TRUE	15:67377209-67377413
cg14162076	12	8556359	1044	CLEC4D	TRUE	12:8556211-8556415
cg24499411	7	47546772	1048	TNS3	TRUE	7:47546572-47546780
cg22294577	7	107231964	1091	SLC26A3	FALSE
cg18705776	10	5555829	1095	CALML3	FALSE
cg16359129	1	160614376	1101	C1orf111	FALSE
cg13259290	5	131436281	1103	CSF2	FALSE
cg25426302	6	32228804	1106	PRRT1	TRUE	6:32228589-32230636
cg18085435	18	53551165	1128	ATP8B1	TRUE	18:53550846-53551198
cg09936762	10	80629694	1143	RAI17	FALSE
cg06973652	17	38532148	1154	BRCA1	TRUE	17:38531525-38532730
cg02899723	5	55069371	1162	DDX4	TRUE	5:55069274-55070254
cg04721098	16	24173204	1173	CACNG3	FALSE
cg04727522	18	75894170	1176	C18orf22	TRUE	18:75894147-75895900
cg07371530	16	779582	1198	RPUSD1	TRUE	16:779478-779751
cg20158826	11	66116065	1201	CCS	FALSE
cg26502489	11	117553756	1210	SCN2B	FALSE
cg00488300	16	1216491	1236	TPSG1	FALSE
cg01144251	19	56205958	1256	KLK9	FALSE
cg14448116	1	159436734	1266	ADAMTS4	FALSE
cg19000186	4	47650768	1285	CNGA1	TRUE	4:47650682-47650965
cg16112945	9	135275627	1314	ADAMTS13	FALSE
cg13897449	X	55038566	1331	PFKFB1	FALSE
cg14375111	3	14140187	1359	TMEM43	FALSE
cg05444024	19	5792072	1369	FUT6	TRUE	19:5791770-5792128
cg03993463	21	38549141	1393	KCNJ15	FALSE
cg00226923	6	37080005	1396	FGD2	FALSE
cg27336379	1	75850818	1459	SLC44A5	FALSE
cg21022395	10	112712430	1473	SHOC2	FALSE
cg13255629	4	88971684	1478	MEPE	FALSE
cg03604278	3	9897234	1494	CIDEC	FALSE
cg00995152	9	123536136		DAB2IP	TRUE	9:123536075-123536593
cg04132607	20	60474851		GATA5	TRUE	20:60474622-60475245
cg11492040	11	1973089		H19	TRUE	11:1973035-1973716
cg26808784	11	1974059		H19	TRUE	11:1973888-1974871
cg17229197	11	2499264		KCNQ1	TRUE	11:2498865-2499473
cg17820828	11	2769874		KCNQ1	TRUE	11:2768881-2770074
cg19728223	11	2769697		KCNQ1	TRUE	11:2768881-2770074
cg26750319	11	2550536		KCNQ1	TRUE	11:2550370-2550883
cg12514506	11	3077862		OSBPL5	TRUE	11:3077516-3078062
cg13550608	3	50289658		SEMA3B	TRUE	3:50287560-50290055
cg06244906	19	61998893		ZIM2	TRUE	19:61998334-61999073

## Sheet: Mild
CG ID	Chr	MapInfo	Distance_to_TSS	Symbol	CPG_ISLAND	CPG_ISLAND_LOCATIONS
cg10660256	5	78443439	0	BHMT	TRUE	5:78443059-78443592
cg16944093	2	128138590	0	LIMS2	TRUE	2:128138052-128138773
cg18429742	5	904101	0	ZDHHC11	TRUE	5:903892-904165
cg09643544	19	9334696	0	ZNF177	TRUE	19:9334490-9335153
cg20437604	1	149221178	0	ANXA9	FALSE
cg19466563	4	88669530	0	SPARCL1	FALSE
cg01410472	8	76059530	1	CRISPLD1	TRUE	8:76059047-76060044
cg12818699	6	24985561	1	C6orf32	FALSE
cg06193397	8	120720250	1	ENPP2	FALSE
cg23219570	12	4359154	1	FGF23	FALSE
cg09555879	19	47261796	1	GRIK5	FALSE
cg24471894	9	2828508	1	KIAA0020	FALSE
cg12008118	10	88418409	1	LDB3	FALSE
cg15169162	6	42798286	1	RDS	FALSE
cg23765993	20	43609443	1	SPINLW1	FALSE
cg05912121	11	2149610	1	TH	FALSE
cg24091474	19	41091025	1	TYROBP	FALSE
cg21561173	21	14274634	2	C21orf81	TRUE	21:14273649-14275990
cg26185508	1	54392033	2	CDCP2	TRUE	1:54391846-54392065
cg07545232	X	151688898	2	MAGEA3	TRUE	X:151688663-151689075
cg26055770	3	73756760	2	PDZRN3	TRUE	3:73755774-73757236
cg14717170	3	166397165	2	SLITRK3	TRUE	3:166396716-166397896
cg26422060	11	67163605	2	TBX10	TRUE	11:67163602-67163840
cg25021182	1	15675181	2	ELA2B	FALSE
cg20732137	20	61721671	2	GMEB2	FALSE
cg11505080	X	53095229	2	GPR173	FALSE
cg24585690	5	135259413	2	IL9	FALSE
cg21065959	1	151025379	2	LCE1E	FALSE
cg20649991	19	59452939	2	LILRB5	FALSE
cg18053607	22	29848963	2	PIB5PA	FALSE
cg08113203	4	71283449	2	SMR3B	FALSE
cg15503752	17	72151326	2	ST6GALNAC1	FALSE
cg08539991	19	40895672	2	ZBTB32	FALSE
cg21542793	2	96145618	3	ADRA2B	TRUE	2:96144986-96147016
cg03721967	13	113057721	3	GRTP1	TRUE	13:113056844-113057988
cg01352108	11	63815454	3	KCNK4	TRUE	11:63815450-63816817
cg10071275	20	62266274	3	MYT1	TRUE	20:62266213-62266511
cg05078019	4	609392	3	PDE6B	TRUE	4:609359-609999
cg21825364	Y	14677489	3	VCY	TRUE	Y:14677314-14677669
cg03743584	10	135010898	3	PRAP1	FALSE
cg03908676	11	10546858	3	XLKD1	FALSE
cg17301902	9	79453039	4	GNA14	TRUE	9:79451891-79453694
cg19105504	11	60281048	4	MGC35295	TRUE	11:60280945-60281190
cg06330621	16	86082962	4	ZCCHC14	TRUE	16:86081665-86084844
cg24680602	17	4967117	4	ZNF232	TRUE	17:4966375-4968109
cg15799267	17	7883131	4	ALOX15B	FALSE
cg08551633	19	47790886	4	CEACAM8	FALSE
cg09839960	15	23074587	4	HBII-438B	FALSE
cg19961522	20	29871049	4	MYLK2	FALSE
cg14700707	6	32299818	4	NOTCH4	FALSE
cg10832166	15	22847721	4	PWCR1	FALSE
cg14659547	3	109958816	4	RETNLB	FALSE
cg19803984	15	22619883	4	SNRPN	FALSE
cg11255163	16	67328701	5	CDH1	TRUE	16:67328348-67330000
cg03962522	22	30769254	5	SLC5A1	TRUE	22:30769023-30769564
cg22407458	6	35217099	5	TCP11	TRUE	6:35216605-35217470
cg09814877	19	55985489	5	ACPT	FALSE
cg26847490	7	94953225	5	ASB4	FALSE
cg07881407	17	31337857	5	CCL14	FALSE
cg00750606	1	20771708	5	CDA	FALSE
cg03770548	14	22594880	5	CDH24	FALSE
cg13853198	1	159451716	5	FCER1G	FALSE
cg04030848	22	29290881	5	GAL3ST1	FALSE
cg07572435	8	143865015	5	LY6D	FALSE
cg19423196	10	82039409	5	MAT1A	FALSE
cg12339029	2	210888147	5	MYL1	FALSE
cg12061127	20	43693326	5	WFDC9	FALSE
cg21902327	12	4425047	6	FGF6	TRUE	12:4425015-4425387
cg26320696	11	12355685	6	PARVA	TRUE	11:12355424-12356620
cg12537796	X	106402474	6		TRUE	X:106402236-106403147
cg08675585	14	76362486	6	C14orf166B	FALSE
cg12616487	11	62135639	6	EML3	FALSE
cg07354209	2	162808285	6	FAP	FALSE
cg03167883	8	49665520	6	FLJ46365	FALSE
cg06673956	6	46990831	6	GPR116	FALSE
cg21856603	17	3660572	6	ITGAE	FALSE
cg16773028	1	110949862	6	KCNA2	FALSE
cg11880010	9	78518464	6	KIAA0367	FALSE
cg03960217	1	150914401	6	LCE2C	FALSE
cg13019092	1	144439077	6	PDZK1	FALSE
cg09494188	11	61943105	6	SCGB1A1	FALSE
cg08573687	11	2149617	6	TH	FALSE
cg10432859	2	234255329	6	UGT1A7	FALSE
cg24891133	13	30378335	7	FLJ14834	TRUE	13:30378164-30379189
cg17410236	14	85066248	7	FLRT2	TRUE	14:85065422-85066845
cg04305913	9	138348733	7	GPSM1	TRUE	9:138348614-138348948
cg16178491	12	100128127	7	SLC5A8	TRUE	12:100127137-100128325
cg24874111	19	9646727	7	ZNF562	TRUE	19:9646258-9647647
cg24443136	X	152454781	7	ATP2B3	FALSE
cg08057475	15	43590633	7	C15orf21	FALSE
cg07950803	1	156490558	7	CD1A	FALSE
cg26366091	1	111571797	7	CHI3L2	FALSE
cg04613080	X	150653867	7	CNGA2	FALSE
cg10134939	2	75650363	7	FLJ13391	FALSE
cg17099569	2	121266336	7	GLI2	FALSE
cg15344028	2	204509755	7	ICOS	FALSE
cg27478659	17	37022538	7	KRT16	FALSE
cg00684178	2	242400753	7	NEU4	FALSE
cg05071677	5	180514556	7	OR2V2	FALSE
cg01797043	16	1944687	7	RPL3L	FALSE
cg22836470	12	107515906	7	TMEM119	FALSE
cg23989635	16	67328704	8	CDH1	TRUE	16:67328348-67330000
cg02992632	3	193928074	8	FGF12	TRUE	3:193927501-193928340
cg01413516	19	17793328	8	INSL3	TRUE	19:17792758-17793397
cg04471507	1	26105963	8	STMN1	TRUE	1:26104408-26106291
cg00095526	1	199348309	8	CACNA1S	FALSE
cg22282672	5	121493122	8	FLJ32921	FALSE
cg02022375	17	36451247	8	KRTAP1-1	FALSE
cg07899016	5	140568483	8	PCDHB12	FALSE
cg25433648	1	151855406	8	S100A14	FALSE
cg12215675	6	167658584	8	TTLL2	FALSE
cg25596297	2	222871119	9	FLJ32447	TRUE	2:222871073-222872248
cg10189695	4	8633200	9	GPR78	TRUE	4:8632931-8634384
cg12728629	X	151673029	9	MAGEA2	TRUE	X:151672876-151673193
cg25829729	13	35686667	9	TEB1	TRUE	13:35686240-35687144
cg21432842	17	35425223	9	CSF3	FALSE
cg00745543	12	47009021	9	H1T2	FALSE
cg24895052	17	39265127	9	MPP3	FALSE
cg06806711	11	59979867	9	MS4A1	FALSE
cg16862361	2	31491126	9	XDH	FALSE
cg23984130	2	88996300	9		FALSE
cg19767249	11	125678847	10	DCPS	TRUE	11:125678695-125679596
cg27626299	7	27248956	10	EVX1	TRUE	7:27248572-27250267
cg24427660	11	808892	10	PNPLA2	TRUE	11:808884-809164
cg16232126	2	107969437	10	SLC5A7	TRUE	2:107969161-107970056
cg24615251	17	29707594	10	CCL13	FALSE
cg24641737	1	111544794	10	DENND2D	FALSE
cg13842648	5	135259425	10	IL9	FALSE
cg04311964	8	143830944	10	LYPD2	FALSE
cg18493182	8	143830964	10	LYPD2	FALSE
cg27550918	10	75080783	10	SYNPO2L	FALSE
cg24309555	2	21120461	11	APOB	TRUE	2:21120039-21120603
cg03819692	16	87753140	11	FLJ36701	TRUE	16:87752957-87753393
cg16652063	17	6557377	11	SLC13A5	TRUE	17:6556978-6558390
cg21402035	22	36549346	11	GALR3	FALSE
cg03803009	17	69875229	11	GPR142	FALSE
cg08812936	3	179736907	11	KCNMB2	FALSE
cg25214346	1	159474590	11	NR1I3	FALSE
cg09563216	1	148521865	12	C1orf51	TRUE	1:148520405-148522224
cg05073035	3	148609883	12	ZIC1	TRUE	3:148609249-148612068
cg06276653	8	139233817	12	C8ORFK32	FALSE
cg24870391	17	29636788	12	CCL11	FALSE
cg27443224	9	34700135	12	CCL21	FALSE
cg17791617	10	79298947	12	DLG5	FALSE
cg20906802	6	47857745	12	OPN5	FALSE
cg08612037	12	106236340	13	BTBD11	TRUE	12:106235619-106239476
cg00551244	8	125252957	13	C8orf78	TRUE	8:125252840-125253126
cg06872381	12	7755343	13	DPPA3	TRUE	12:7755307-7755517
cg05822532	7	73080467	13	ELN	TRUE	7:73080116-73080605
cg09208010	14	22375620	13	MMP14	TRUE	14:22375571-22376887
cg06667406	7	121561125	13	AASS	FALSE
cg02998425	14	69993957	13	ADAM21	FALSE
cg24607535	20	57966890	13	CDH26	FALSE
cg09462575	20	43236899	13	PI3	FALSE
cg14076161	12	11354646	13	PRB4	FALSE
cg08970446	1	53380850	13	SLC1A7	FALSE
cg19787037	8	7308589	13	SPAG11	FALSE
cg07613153	14	103506700	13	TDRD9	FALSE
cg26238727	2	234209849	13	UGT1A10	FALSE
cg12973651	19	47586293	14	CNFN	TRUE	19:47586067-47586328
cg15812957	Y	14677478	14	VCY	TRUE	Y:14677314-14677669
cg00983899	11	67047429	14	CABP2	FALSE
cg00136405	4	123761648	14	IL21	FALSE
cg11983245	17	36928680	14	KRT15	FALSE
cg08343834	17	15109383	14	PMP22	FALSE
cg25221254	19	6284547	15	ASAH3	TRUE	19:6284351-6284668
cg11634198	17	35017684	15	NEUROD2	TRUE	17:35017446-35018010
cg22016649	11	808917	15	PNPLA2	TRUE	11:808884-809164
cg08887581	1	16203303	15	C1orf64	FALSE
cg09096031	2	198248814	15	C2orf11	FALSE
cg24030609	1	15675198	15	ELA2B	FALSE
cg06907544	15	20806668	15	FLJ35785	FALSE
cg06204948	11	63412666	15	MARK2	FALSE
cg10694914	11	110755641	15	POU2AF1	FALSE
cg01772980	11	61714271	15	SCGB1D1	FALSE
cg19478478	6	123999626	15	TRDN	FALSE
cg13424446	20	23917432	16	GGTLA4	TRUE	20:23916273-23917531
cg17738194	4	80548412	16	GK2	TRUE	4:80548404-80548638
cg05152459	X	74921812	16	MAGEE2	TRUE	X:74921219-74922001
cg20322862	18	3402088	16	TGIF	TRUE	18:3401960-3402369
cg21045917	X	55074120	16	ALAS2	FALSE
cg18669381	1	16411675	16	ARHGEF19	FALSE
cg01248426	8	87180271	16	ATP6V0D2	FALSE
cg15903395	2	88605268	16	FLJ25369	FALSE
cg15820955	12	46479206	16	HDAC7A	FALSE
cg18292394	10	82039430	16	MAT1A	FALSE
cg16466334	11	102219568	16	MMP3	FALSE
cg27631817	6	10168924	16	OFCC1	FALSE
cg15417244	12	40117825	16	PDZRN4	FALSE
cg24024214	5	180258748	17	BTNL8	TRUE	5:180258708-180258931
cg16357921	9	89779454	17	CCRK	TRUE	9:89778806-89780121
cg27493997	1	154942016	17	CRABP2	TRUE	1:154941303-154943404
cg20356482	9	96395913	17	FBP2	TRUE	9:96395689-96395929
cg06230736	10	8136656	17	GATA3	TRUE	10:8135268-8138450
cg14959707	16	11783892	17	ZC3H7A	TRUE	16:11783829-11784227
cg19714296	1	47179987	17	CYP4A11	FALSE
cg19910382	2	88208676	17	FABP1	FALSE
cg02729303	5	16561920	17	FLJ20152	FALSE
cg05404787	2	10198977	17	FLJ25102	FALSE
cg25634666	11	71524436	17	FOLR3	FALSE
cg06547766	3	189413398	17	LPP	FALSE
cg14662756	12	52187672	17	NPFF	FALSE
cg25187533	19	48278627	17	PSG2	FALSE
cg06148175	11	67174724	18	ACY3	TRUE	11:67174436-67174737
cg15408454	X	151617883	18	MAGEA6	TRUE	X:151617742-151618072
cg22035229	1	76035236	18	MSH4	TRUE	1:76034981-76035517
cg08314660	11	384199	18	PKP3	TRUE	11:384143-384690
cg26521448	16	11783927	18	ZC3H7A	TRUE	16:11783829-11784227
cg14189571	4	189153937	18	ZFP42	TRUE	4:189153056-189154305
cg19756068	19	46189062	18	CYP2B6	FALSE
cg24743310	17	19560497	18	FLJ31196	FALSE
cg20034100	6	125346195	18	IBRDC1	FALSE
cg10634551	3	179736936	18	KCNMB2	FALSE
cg06650260	1	27113065	18	NR0B2	FALSE
cg25734864	13	112860987	18	PROZ	FALSE
cg06399881	4	68793986	18	TMPRSS11B	FALSE
cg19882093	20	23917397	19	GGTLA4	TRUE	20:23916273-23917531
cg07785936	2	132891105	19	GPR39	TRUE	2:132889810-132891152
cg17725472	1	201465380	19	CHIT1	FALSE
cg20993403	20	34163743	19	EPB41L1	FALSE
cg09022808	22	29290857	19	GAL3ST1	FALSE
cg11812202	10	118295399	19	PNLIP	FALSE
cg12793610	4	154345087	19	TRIM2	FALSE
cg09936561	4	9392721	20	DRD5	TRUE	4:9391873-9394231
cg22709192	12	52653176	20	HOXC11	TRUE	12:52652893-52656105
cg16772207	20	62266251	20	MYT1	TRUE	20:62266213-62266511
cg12435792	4	609375	20	PDE6B	TRUE	4:609359-609999
cg14283939	15	69807962	20	THSD4	TRUE	15:69807869-69808151
cg12259537	19	63206506	20	ZNF606	TRUE	19:63205137-63206903
cg00319692	8	87180235	20	ATP6V0D2	FALSE
cg19351638	X	152823584	20	AVPR2	FALSE
cg08670691	1	3658802	20	CCDC27	FALSE
cg01796223	7	129720250	20	CPA4	FALSE
cg24938727	3	42717997	20	GUP1	FALSE
cg26099316	3	52803834	20	ITIH3	FALSE
cg20442697	7	102340668	20	LRRC17	FALSE
cg06825166	10	98109069	20	TMEM10	FALSE
cg24323726	3	112796876	20	ZBED2	FALSE
cg06985415	10	133805401	21	C10orf39	TRUE	10:133805370-133805647
cg17233506	17	43963292	21	HOXB1	TRUE	17:43962669-43963416
cg17928268	20	23381503	21	CST11	FALSE
cg11921829	1	156013554	21	FCRL2	FALSE
cg25081201	10	43187077	21	FXYD4	FALSE
cg04788442	1	184532020	21	PRG4	FALSE
cg19979896	6	150253811	21	RAET1E	FALSE
cg03580247	17	39701014	21	SLC4A1	FALSE
cg18680834	19	35555189	21	ZNF536	FALSE
cg20543571	15	43036170	22	C15orf43	TRUE	15:43036097-43036298
cg21012874	10	88708373	22	SNCG	TRUE	10:88708277-88708496
cg18530748	16	28542345	22	SULT1A1	TRUE	16:28541800-28542952
cg06493386	8	73150351	22	TRPA1	TRUE	8:73149852-73150676
cg18374517	2	232979819	22	ALPPL2	FALSE
cg12810837	12	9713554	22	CLEC2D	FALSE
cg05020203	2	242617502	22	FLJ41327	FALSE
cg08489623	7	55869714	22	FLJ44060	FALSE
cg21922731	12	55443397	22	HSD17B6	FALSE
cg12391921	X	70438375	22	ITGB1BP2	FALSE
cg06238491	19	59568258	22	LAIR1	FALSE
cg24698533	10	30958631	22	LYZL2	FALSE
cg07426848	1	151788336	22	S100A3	FALSE
cg17971003	11	107088014	22	SLN	FALSE
cg11469778	2	131390671	23	ARHGEF4	TRUE	2:131390078-131390751
cg24058132	14	87529619	23	GALC	TRUE	14:87528346-87529624
cg15177917	19	12941409	23	DAND5	FALSE
cg12387247	19	7672974	23	FCER2	FALSE
cg00587613	11	66976799	23	GPR152	FALSE
cg12845808	5	141318788	23	PCDH12	FALSE
cg02105856	1	205186407	23	PIGR	FALSE
cg07256847	6	167717965	23	TCP10	FALSE
cg05647859	12	79855849	24	LIN7A	TRUE	12:79854346-79856034
cg10917619	2	51109131	24	NRXN1	TRUE	2:51107966-51109135
cg19780563	10	94584474	24	EXOC6	FALSE
cg25066857	2	85774949	24	GNLY	FALSE
cg06096336	2	231698044	24	HTR2B	FALSE
cg26251865	19	48912054	24	IRGC	FALSE
cg05185584	11	17366758	24	KCNJ11	FALSE
cg00280894	X	101365619	24	NXF2	FALSE
cg14511156	19	59295936	24	OSCAR	FALSE
cg18333690	1	17507303	24	PADI4	FALSE
cg15329483	X	52700699	24	SSX7	FALSE
cg20723355	17	6620321	25	FBXO39	TRUE	17:6619831-6620556
cg12707353	4	8491529	25	FLJ35725	TRUE	4:8491447-8491703
cg20931907	X	51166482	25	LOC340602	TRUE	X:51166104-51167780
cg20544605	4	187114491	25	SORBS2	TRUE	4:187114454-187114657
cg04391540	19	52739941	25	ZNF541	TRUE	19:52739817-52741134
cg22247240	14	73884940	25	C14orf115	FALSE
cg22241124	2	98352807	25	CNGA3	FALSE
cg16440909	X	149364403	25	CXorf6	FALSE
cg18901980	17	36165066	25	KRT25A	FALSE
cg22575540	2	27359129	25	TRIM54	FALSE
cg16280667	11	118259803	26	BLR1	TRUE	11:118259679-118259945
cg24130010	21	18539047	26	CHODL	TRUE	21:18538786-18539779
cg21553596	21	41610505	26	FAM3B	TRUE	21:41610281-41611298
cg16848873	17	44037307	26	HOXB6	TRUE	17:44037214-44037432
cg15627025	19	60019718	26	KIR3DL1	TRUE	19:60019463-60019852
cg09748960	6	32482904	26	BTNL2	FALSE
cg10375110	4	40032200	26	CHRNA9	FALSE
cg13509147	19	4104603	26	CREB3L3	FALSE
cg13633560	11	76058569	26	LRRC32	FALSE
cg22268164	8	110168926	26	TRHR	FALSE
cg03723845	5	180258792	27	BTNL8	TRUE	5:180258708-180258931
cg12728032	11	34491933	27	ELF5	TRUE	11:34491755-34491993
cg07233761	5	54317194	27	ESM1	TRUE	5:54316863-54317280
cg06490988	3	129694691	27	GATA2	TRUE	3:129693171-129695283
cg22884082	6	88095742	27	GJB7	TRUE	6:88095196-88095760
cg22039846	19	59973065	27	KIR2DL1	TRUE	19:59972811-59973197
cg27305662	6	31188284	27	C6orf15	FALSE
cg00491404	1	110108114	27	EPS8L3	FALSE
cg23813257	16	3055287	27	IL32	FALSE
cg01112778	5	146441180	27	PPP2R2B	FALSE
cg23280807	16	24765080	27	SLC5A11	FALSE
cg21578906	22	30981345	27	SLC5A4	FALSE
cg17339202	1	32933487	27	SYNC1	FALSE
cg11051843	7	80386631	28	SEMA3C	TRUE	7:80386071-80386790
cg11750883	1	150753574	28	C1orf42	FALSE
cg05256043	13	93929952	28	DCT	FALSE
cg08784110	6	160247992	28	MAS1	FALSE
cg02657438	14	80934652	28	STON2	FALSE
cg16632715	2	176680359	29	HOXD11	TRUE	2:176679513-176681344
cg13274713	17	56832068	29	TBX2	TRUE	17:56827708-56833527
cg17032587	X	150653903	29	CNGA2	FALSE
cg27126442	4	106693255	29	FLJ20184	FALSE
cg05023691	1	190871876	29	RGS13	FALSE
cg22862656	11	61794235	29	SCGB2A2	FALSE
cg04457051	4	141397919	29	SCOC	FALSE
cg26872564	X	151837292	29	ZNF185	FALSE
cg27117399	18	70352702	30	CNDP1	TRUE	18:70352594-70352798
cg14228238	3	170346817	30	EVI1	TRUE	3:170346659-170347262
cg24496423	X	152699674	30	STK23	TRUE	X:152699478-152699970
cg12417466	3	35658823	30	ARPP-21	FALSE
cg15967525	4	40212695	30	FLJ20273	FALSE
cg19560210	1	228579960	30	PGBD5	FALSE
cg10857345	X	107112286	30	TEX13B	FALSE
cg25414165	10	77212494	31	C10orf11	TRUE	10:77212410-77212612
cg02875297	9	5294611	31	RLN2	TRUE	9:5293703-5294659
cg08411049	18	59295230	31	SERPINB5	TRUE	18:59294878-59295284
cg03515901	Y	3507157	31	TGIF2LY	TRUE	Y:3507149-3507995
cg22959932	3	8668706	31	C3orf32	FALSE
cg24110063	16	31347253	31	COX6A2	FALSE
cg25226014	3	45959946	31	CXCR6	FALSE
cg02989940	16	31446735	31	ERAF	FALSE
cg03251655	17	30783625	31	FLJ10260	FALSE
cg02764897	21	30690182	31	KRTAP13-1	FALSE
cg24506604	12	50865769	31	LOC144501	FALSE
cg19873701	19	48465489	31	PSG9	FALSE
cg09426307	22	29198048	31	SEC14L3	FALSE
cg20851097	14	64359588	31	SPTB	FALSE
cg19139729	19	53081374	31	SULT2A1	FALSE
cg02810134	20	43889329	31	TNNC2	FALSE
cg03365437	15	56145166	32	ALDH1A2	TRUE	15:56144403-56146241
cg25087423	11	118259745	32	BLR1	TRUE	11:118259679-118259945
cg14784653	10	13585014	32	C10orf30	FALSE
cg03156547	14	22594843	32	CDH24	FALSE
cg26298099	14	75907511	32	ESRRB	FALSE
cg13897627	16	47935998	32	FLJ44674	FALSE
cg23272214	21	46094271	32	PCBP3	FALSE
cg22161874	9	76692862	32	TRPM6	FALSE
cg13003163	12	47152748	33	ANP32D	TRUE	12:47152601-47152805
cg22930187	1	44171546	33	ARTN	TRUE	1:44171543-44171935
cg13379763	2	219600760	33	DKFZp434O0527	TRUE	2:219600581-219600781
cg08284151	12	7755389	33	DPPA3	TRUE	12:7755307-7755517
cg22983529	7	93389068	33	GNG11	TRUE	7:93388850-93389536
cg12343082	16	86527646	33	CA5A	FALSE
cg09432154	3	152517359	33	GPR87	FALSE
cg14477619	7	44547406	33	NPC1L1	FALSE
cg25450806	1	13903970	33	PRDM2	FALSE
cg17778120	3	140678009	33	RBP2	FALSE
cg23347958	17	38916826	34	DHX8	TRUE	17:38916405-38917727
cg17606785	14	22904648	34	EFS	TRUE	14:22904000-22905142
cg26609631	13	27264814	34	GSH1	TRUE	13:27263400-27265360
cg05615150	3	35658819	34	ARPP-21	FALSE
cg19216731	11	19180211	34	CSRP3	FALSE
cg15952725	1	15655777	34	ELA2A	FALSE
cg03459809	1	224079633	34	EPHX1	FALSE
cg20169062	5	53787168	34	HSPB3	FALSE
cg10269439	2	113387053	34	IL1F7	FALSE
cg19853760	22	36401623	34	LGALS1	FALSE
cg10127415	X	26120444	34	MAGEB6	FALSE
cg11554507	7	31347097	34	NEUROD6	FALSE
cg16986846	11	61732750	34	SCGB2A1	FALSE
cg16715722	10	102880286	34	TLX1	FALSE
cg09872233	17	4491674	35	ALOX15	TRUE	17:4489288-4492318
cg04336572	X	119380030	35	ATP1B4	FALSE
cg08424423	6	31196167	35	CDSN	FALSE
cg18063149	1	169326695	35	FMO3	FALSE
cg27606341	5	39255389	35	FYB	FALSE
cg08684473	19	59452902	35	LILRB5	FALSE
cg04037228	3	45611390	35	LIMD1	FALSE
cg26125600	4	74937842	35	PF4V1	FALSE
cg16558203	3	38322396	35	SLC22A14	FALSE
cg01029592	17	7434177	35	SOX15	FALSE
cg25053900	X	24943811	36	ARX	TRUE	X:24943461-24944792
cg25979644	18	53550001	36	ATP8B1	FALSE
cg19546781	16	55996216	36	CCL17	FALSE
cg22319147	16	64958100	36	CDH5	FALSE
cg18236734	3	185300625	36	HTR3E	FALSE
cg22190114	19	61151046	36	NALP8	FALSE
cg10321723	1	144439119	36	PDZK1	FALSE
cg09699159	11	45072104	36	PRDM11	FALSE
cg06849477	22	43451388	36	PRR5	FALSE
cg25762706	8	27171784	36	STMN4	FALSE
cg00311768	8	144770000	36	TSTA3	FALSE
cg17561452	16	82782208	37	LOC161931	TRUE	16:82781939-82782678
cg21252483	19	54091600	37	NUCB1	TRUE	19:54091451-54091731
cg18536148	17	56888626	37	TBX4	TRUE	17:56888442-56889722
cg25942450	5	170668856	37	TLX3	TRUE	5:170667594-170672661
cg20359349	17	39350057	37	APR-2	FALSE
cg13349425	5	134810974	37	C5orf20	FALSE
cg10490064	22	23947422	37	CRYBB2	FALSE
cg16019620	6	46869049	37	MEP1A	FALSE
cg19382714	6	29732825	37	MOG	FALSE
cg05322019	10	102722313	37	SEMA4G	FALSE
cg20832020	3	115495602	37	VSIG9	FALSE
cg06908474	11	34417092	38	CAT	TRUE	11:34416588-34417548
cg05252264	19	60077399	38	FCAR	TRUE	19:60077372-60077579
cg05441133	10	48036897	38	GDF2	TRUE	10:48036704-48037082
cg24199834	4	147779576	38	POU4F2	TRUE	4:147778503-147781596
cg12439899	6	10523218	38	TFAP2A	TRUE	6:10519201-10524183
cg06007645	1	54880009	38	C1orf175	FALSE
cg26647453	4	100651185	38	C4orf17	FALSE
cg25412453	1	153272843	38	DCST2	FALSE
cg26023389	6	53121548	38	GCM1	FALSE
cg19982860	9	21156581	38	IFNA21	FALSE
cg10248727	9	137553145	38	LCN1	FALSE
cg08471713	17	39094419	38	MEOX1	FALSE
cg09163021	11	47427344	38	RAPSN	FALSE
cg16051685	1	26266670	38	TRIM63	FALSE
cg02613386	17	6620257	39	FBXO39	TRUE	17:6619831-6620556
cg11675413	13	97627483	39	RNF113B	TRUE	13:97626465-97627827
cg22242539	17	1611970	39	SERPINF1	TRUE	17:1611855-1612057
cg06444781	12	119900893	39	TCF1	TRUE	12:119900805-119901025
cg09440340	1	116455938	39	C1orf161	FALSE
cg24264578	16	3345903	39	OR2C1	FALSE
cg23081213	2	219404716	40	PRKAG3	TRUE	2:219404498-219404730
cg16194715	13	36351926	40	SMAD9	TRUE	13:36351769-36352075
cg04527918	2	27384674	40	UCN	TRUE	2:27382533-27385080
cg19654437	2	202379403	40	ALS2CR7	FALSE
cg27223827	2	105421352	40	FHL2	FALSE
cg00019495	4	57242282	40	HOP	FALSE
cg13442811	10	86121080	40	KIAA1128	FALSE
cg23143093	3	27308028	40	NEK10	FALSE
cg16193203	10	74983144	40	USP54	FALSE
cg04595372	6	49789192	41	CRISP2	TRUE	6:49789004-49789531
cg25211252	3	180467491	41	KCNMB3	TRUE	3:180467337-180467703
cg17894008	17	57023386	41	NACAL	TRUE	17:57023173-57023543
cg24926780	19	15699895	41	OR10H2	TRUE	19:15699863-15700302
cg08176694	12	122085110	41	PITPNM2	TRUE	12:122084936-122085146
cg23513690	5	145296294	41	SH3RF2	TRUE	5:145296191-145296726
cg19629292	3	62334020	41	ZNF312	TRUE	3:62333884-62335038
cg23037403	5	178300789	41	ZNF454	TRUE	5:178300061-178301434
cg06123346	19	40746359	41	ATP4A	FALSE
cg00412772	19	43486685	41	C19orf33	FALSE
cg23760945	19	11526140	41	ELOF1	FALSE
cg10409560	4	76700323	41	FLJ23657	FALSE
cg10494770	22	22252454	41	IGLL1	FALSE
cg00412805	3	42701974	41	KBTBD5	FALSE
cg22077553	1	169888355	41	MYOC	FALSE
cg24331162	11	1812241	41	SYT8	FALSE
cg17329164	6	32229237	42	PPT2	TRUE	6:32228589-32230636
cg26491213	2	45022323	42	SIX3	TRUE	2:45022104-45024317
cg24956866	7	134114669	42	CALD1	FALSE
cg20300655	5	134331471	42	CATSPER3	FALSE
cg23777956	19	4104671	42	CREB3L3	FALSE
cg09076584	17	23965380	42	FLJ25006	FALSE
cg17667972	12	51494560	42	KRT4	FALSE
cg16418329	4	71235340	42	NYD-SP26	FALSE
cg14620221	11	123816149	42	OR8B8	FALSE
cg09447105	12	15017287	42	PDE6H	FALSE
cg20792833	11	66961771	42	PTPRCAP	FALSE
cg25358289	5	139992912	43	CD14	TRUE	5:139991494-139993011
cg17703554	8	88955455	43	WDR21C	TRUE	8:88954770-88955987
cg19954000	5	142045855	43	FGF1	FALSE
cg17982671	19	44427408	43	IL28B	FALSE
cg15606663	21	30734474	43	KRTAP15-1	FALSE
cg21965997	10	135000357	44	DRD1IP	TRUE	10:134998098-135000843
cg08422599	5	169863670	44	KCNIP1	TRUE	5:169863374-169864167
cg22152667	7	97457308	44	OCM	TRUE	7:97457217-97457435
cg26556719	5	140241994	44	PCDHA13	TRUE	5:140241916-140242537
cg26644395	10	5397020	44	UCN3	TRUE	10:5396811-5397265
cg26839325	X	50670568	44	BMP15	FALSE
cg13765961	11	59979814	44	MS4A1	FALSE
cg09736922	3	185578670	44	THPO	FALSE
cg02441647	3	100840189	45	COL8A1	TRUE	3:100840163-100840365
cg19848683	3	170346742	45	EVI1	TRUE	3:170346659-170347262
cg03251079	12	64504552	45	HMGA2	TRUE	12:64503601-64506562
cg18587364	19	9646779	45	ZNF562	TRUE	19:9646258-9647647
cg16411152	4	176076179	45	ADAM29	FALSE
cg13042288	15	88150983	45	ANPEP	FALSE
cg10315334	17	31231445	45	CCL5	FALSE
cg01958189	20	16396	45	DEFB125	FALSE
cg00840516	3	50335101	45	HYAL2	FALSE
cg06796611	1	205137457	45	IL24	FALSE
cg03097995	19	60360903	45	TNNI3	FALSE
cg12182525	4	177427315	46	ASB5	FALSE
cg16270990	11	130048107	46	C11orf44	FALSE
cg15976539	18	22699316	46	C18orf16	FALSE
cg05700681	16	55950265	46	CCL22	FALSE
cg10635061	2	105421438	46	FHL2	FALSE
cg26589285	19	44478851	46	IL29	FALSE
cg25665697	15	64644935	46	LCTL	FALSE
cg15329866	3	172938520	46	PLD1	FALSE
cg21122774	9	135594817	46	SARDH	FALSE
cg19504245	19	60352432	46	TNNT1	FALSE
cg18043195	9	19023231	47	C9orf138	TRUE	9:19022988-19023266
cg13696012	20	31059021	47	BPIL1	FALSE
cg09585781	17	59304868	47	CSH2	FALSE
cg27513764	17	57811693	47	EFCAB3	FALSE
cg00298357	5	148738984	47	IL17B	FALSE
cg09152089	1	24342151	47	IL22RA1	FALSE
cg13391235	16	83874112	47	MGC22001	FALSE
cg01946401	6	45404079	47	RUNX2	FALSE
cg16509045	9	76692783	47	TRPM6	FALSE
cg15888522	3	46043936	47	XCR1	FALSE
cg13279585	2	89411504	47		FALSE
cg16954341	6	25760360	48	SCGN	TRUE	6:25760176-25760849
cg05520656	19	23733431	48	ZNF681	TRUE	19:23732883-23733571
cg20025970	12	21980827	48	ABCC9	FALSE
cg00613255	11	2138952	48	INS	FALSE
cg12237269	11	107087944	48	SLN	FALSE
cg22136365	16	70168544	48	TAT	FALSE
cg19447966	11	12742349	48	TEAD1	FALSE
cg20683151	2	227952216	48	TM4SF20	FALSE
cg18236477	13	24941066	49	ATP8A2	TRUE	13:24940557-24941659
cg06643227	9	113597060	49	C9orf84	TRUE	9:113597023-113597512
cg26162582	12	4788652	49	KCNA6	TRUE	12:4788356-4789953
cg02919422	8	55533097	49	SOX17	TRUE	8:55532627-55535230
cg19250891	1	158388036	49	ATP1A4	FALSE
cg04063348	6	52217306	49	IL17F	FALSE
cg08477744	1	17180619	49	MFAP2	FALSE
cg01497576	15	46200510	49	SLC24A5	FALSE
cg18766755	1	151296563	49	SPRR2A	FALSE
cg00899659	10	44815977	49	ZNF22	FALSE
cg03886110	17	59817773	50	PECAM1	TRUE	17:59817605-59817882
cg03860768	8	11388980	50	BLK	FALSE
cg03941108	1	22858524	50	C1QB	FALSE
cg21168884	6	169940896	50	C6orf122	FALSE
cg24217877	16	47936080	50	FLJ44674	FALSE
cg03699566	11	71578300	50	FOLR1	FALSE
cg24447890	15	72892197	50	LMAN1L	FALSE
cg18081104	1	150092747	50	THEM5	FALSE
cg25681177	19	40716153	51	GAPDHS	TRUE	19:40715859-40717062
cg19594666	7	127668516	51	LEP	TRUE	7:127667928-127668724
cg12493160	9	70818777	51	PRKACG	TRUE	9:70817795-70819115
cg25057743	2	208979750	51	PTHR2	TRUE	2:208979311-208980425
cg03882305	7	72077882	51	TRIM50C	TRUE	7:72077471-72078733
cg01036012	10	85127	51	TUBB8	TRUE	10:84480-85489
cg24789424	3	198784540	51	BDH	FALSE
cg02060618	X	50670473	51	BMP15	FALSE
cg11075745	1	42978563	51	CLDN19	FALSE
cg25425005	16	142905	51	HBZ	FALSE
cg24512303	8	76614707	51	HNF4G	FALSE
cg14481339	11	128242529	51	KCNJ1	FALSE
cg14870271	17	74487605	51	LGALS3BP	FALSE
cg11328149	6	31797438	51	LY6G6C	FALSE
cg05973262	6	32299873	51	NOTCH4	FALSE
cg17026542	6	132064183	51	OR2A4	FALSE
cg15343119	18	73090773	52	GALR1	TRUE	18:73090255-73093032
cg23555120	12	105057993	52	NUAK1	TRUE	12:105056077-105058153
cg25997474	4	100492992	52	ADH1C	FALSE
cg14221831	16	65510215	52	CDH16	FALSE
cg08474603	1	157951055	52	CRP	FALSE
cg18172186	6	130800007	52	KIAA1913	FALSE
cg02037013	18	56190510	52	MC4R	FALSE
cg27285056	19	55560691	52	NAPSA	FALSE
cg00134539	21	42697140	52	UBASH3A	FALSE
cg01457622	22	21318833	53	GGTL4	TRUE	22:21318788-21319010
cg18902090	5	140286433	53	PCDHAC1	TRUE	5:140285591-140287803
cg19850348	15	53668289	53	PYGO1	TRUE	15:53666933-53668690
cg02164046	3	188870842	53	SST	TRUE	3:188870156-188871038
cg16731240	19	57083062	53	ZNF577	TRUE	19:57082498-57083311
cg16297030	5	35083703	53	AGXT2	FALSE
cg21639401	17	38304194	53	FLJ31222	FALSE
cg11170796	19	1601224	53	TCF3	FALSE
cg21300318	19	4720206	54	C19orf30	TRUE	19:4720131-4720332
cg13929328	10	129425888	54	FLJ46831	TRUE	10:129424072-129426344
cg10486998	18	73090775	54	GALR1	TRUE	18:73090255-73093032
cg23719124	1	110056442	54	GSTM5	TRUE	1:110056117-110056501
cg14458615	3	120347642	54	IGSF11	TRUE	3:120347421-120347771
cg23921534	X	82649903	54	POU3F4	TRUE	X:82649621-82651214
cg07654896	X	46822773	54	RGN	TRUE	X:46822380-46823326
cg04629204	1	26220912	54	EXTL1	FALSE
cg16003913	16	67072	54	MPG	FALSE
cg16762386	1	27113101	54	NR0B2	FALSE
cg01450842	2	48649717	54	SALF	FALSE
cg15913671	17	76919015	54	TMEM105	FALSE
cg02844545	6	10990029	55	GCM2	TRUE	6:10989365-10990276
cg27371741	3	46594162	55	TDGF1	TRUE	3:46594072-46594386
cg24879335	3	134947870	55	TF	TRUE	3:134947530-134948249
cg06590711	X	87888967	55	CPXCR1	FALSE
cg21120249	9	139041792	55	FLJ36268	FALSE
cg03245641	11	64459991	55	GPHA2	FALSE
cg20200335	12	51253821	55	K6IRS4	FALSE
cg07514381	3	46596521	55	LRRC2	FALSE
cg17964955	10	48010942	55	RBP3	FALSE
cg13342558	10	114033538	55	TECTB	FALSE
cg16177830	16	11966520	55	TNFRSF17	FALSE
cg16581199	5	112798620	55	TSSK1	FALSE
cg01704534	4	40212781	56	FLJ20273	TRUE	4:40212767-40212971
cg04005707	4	48683078	56	FLJ21511	TRUE	4:48682670-48683738
cg23813564	X	141120686	56	MAGEC2	TRUE	X:141120608-141120823
cg24435562	5	140573637	56	PCDHB13	TRUE	5:140573526-140573747
cg25995460	1	22836743	56	C1QA	FALSE
cg21478437	1	204484026	56	CTSE	FALSE
cg05039054	X	33267703	56	DMD	FALSE
cg11245384	20	1922646	56	PDYN	FALSE
cg04958389	7	142178834	56	PRSS2	FALSE
cg00757070	11	118332292	56	UPK2	FALSE
cg16878021	14	105280508	56		FALSE
cg27508002	13	36352023	57	SMAD9	TRUE	13:36351769-36352075
cg25328975	X	140500445	57	SPANXA1	TRUE	X:140500247-140500522
cg23218877	10	35576016	57	C10orf9	FALSE
cg06501070	1	85104487	57	EDG7	FALSE
cg08099701	15	24742753	57	GABRA5	FALSE
cg11091262	7	151284387	57	GALNTL5	FALSE
cg09828634	21	30781481	57	KRTAP19-2	FALSE
cg03891191	1	12839585	57	PRAMEF2	FALSE
cg13688966	3	150675067	57	TM4SF4	FALSE
cg20485165	20	43186463	57	WFDC12	FALSE
cg15784332	19	18763172	58	COMP	TRUE	19:18760998-18763459
cg25905812	9	831632	58	DMRT1	TRUE	9:831240-833434
cg11521965	7	136679144	58	PTN	TRUE	7:136678915-136679217
cg26825755	16	20495069	58	ACSM2	FALSE
cg00239071	14	99859490	58	C14orf68	FALSE
cg17399166	1	156416419	58	CD1D	FALSE
cg21063899	13	77007802	58	SCEL	FALSE
cg02982734	15	21442141	59	MAGEL2	TRUE	15:21442139-21442830
cg06255227	20	62208569	59	NPBWR2	TRUE	20:62207758-62208595
cg20630151	3	140305776	59	BPESC1	FALSE
cg19297688	9	5221360	59	INSL4	FALSE
cg13351406	22	34361187	59	LOC284912	FALSE
cg11328541	19	14771889	59	OR7C1	FALSE
cg02498063	12	118256960	60	CCDC60	TRUE	12:118256646-118257076
cg12717203	4	114342	60	FLJ90036	TRUE	4:114215-115524
cg12343777	17	7883067	60	ALOX15B	FALSE
cg17186163	10	44794323	60	C10orf10	FALSE
cg01762581	8	42353771	60	DKK4	FALSE
cg03112869	3	48388773	60	FBXW12	FALSE
cg20373326	16	80626304	60	HSD17B2	FALSE
cg07611925	21	34658253	60	KCNE2	FALSE
cg12454167	3	187917754	60	KNG1	FALSE
cg24365867	11	10672171	60	MRVI1	FALSE
cg14003512	2	87828661	60	PLGLB2	FALSE
cg13015534	17	72151388	60	ST6GALNAC1	FALSE
cg01732037	1	166516842	60	TBX19	FALSE
cg07189381	19	60352326	60	TNNT1	FALSE
cg10968815	20	31059007	61	BPIL1	FALSE
cg01100796	1	53434628	61	CPT2	FALSE
cg11847949	6	32114000	61	CYP21A2	FALSE
cg22478614	8	7789670	61	DEFB4	FALSE
cg21399079	2	105224571	61	GPR45	FALSE
cg20955688	8	133842071	61	TMEM71	FALSE
cg17241310	1	90955444	62	BARHL2	TRUE	1:90954376-90957242
cg20893022	19	4720214	62	C19orf30	TRUE	19:4720131-4720332
cg24333473	16	3433429	62	ZNF597	TRUE	16:3433013-3434267
cg02831294	10	5556862	62	CALML3	FALSE
cg07338205	2	169466026	62	G6PC2	FALSE
cg00536175	X	48529968	62	GATA1	FALSE
cg24794992	16	21597398	62	OTOA	FALSE
cg15754084	12	7234287	62	PEX5	FALSE
cg09871043	6	52060320	62	PKHD1	FALSE
cg26991946	10	102722214	62	SEMA4G	FALSE
cg04336379	7	5078195	63	LOC389458	TRUE	7:5078039-5078627
cg09059635	9	134032018	63	NTNG2	TRUE	9:134031771-134032082
cg20674577	20	57612935	63	PHACTR3	TRUE	20:57612715-57614362
cg05292376	17	76709831	63	AATK	FALSE
cg27257408	15	76313891	63	ACSBG1	FALSE
cg19949550	14	93493457	63	ASB2	FALSE
cg15016628	X	135397854	63	BRS3	FALSE
cg25455753	15	90815974	63	C15orf32	FALSE
cg21372914	19	7734144	63	CLEC4M	FALSE
cg24928687	1	224079536	63	EPHX1	FALSE
cg08786003	1	155937334	63	FCRL3	FALSE
cg12619162	10	43187161	63	FXYD4	FALSE
cg18509239	3	152659124	63	IGSF10	FALSE
cg05246522	17	22823100	63	KSR1	FALSE
cg17827767	10	85991134	63	LRRC21	FALSE
cg13621440	X	101365532	63	NXF2	FALSE
cg22441882	8	20084934	63	SLC18A1	FALSE
cg21491308	19	48584666	63	TEX101	FALSE
cg06092815	2	228754650	64	SKIP	TRUE	2:228754274-228755173
cg11113534	20	31219685	64	C20orf70	FALSE
cg07549715	20	2972204	64	GNRH2	FALSE
cg05159732	17	37591060	64	HCRT	FALSE
cg23696712	12	51514408	64	KRT6L	FALSE
cg14107638	X	151037036	64	MAGEA5	FALSE
cg12855851	6	41823163	64	PGC	FALSE
cg21604856	22	21204677	64	SUHW1	FALSE
cg25298754	3	112796792	64	ZBED2	FALSE
cg02735486	4	114190384	65	ANK2	TRUE	4:114190170-114190408
cg20483374	11	118716856	65	C1QTNF5	TRUE	11:118715376-118716957
cg08453096	2	43919397	65	ABCG5	FALSE
cg07005767	8	107851714	65	ABRA	FALSE
cg24389347	3	127760383	65	C3orf22	FALSE
cg03801286	21	34806378	65	KCNE1	FALSE
cg12970081	19	55965736	66	GPR32	TRUE	19:55965707-55965934
cg01528948	4	100461647	66	ADH1B	FALSE
cg12650635	12	48630730	66	AQP2	FALSE
cg21991396	1	245648040	66	CIAS1	FALSE
cg06285340	15	72446954	66	CYP11A1	FALSE
cg06570843	4	120462700	66	FABP2	FALSE
cg22392708	17	36347296	66	KRT23	FALSE
cg04956382	5	137231539	66	MYOT	FALSE
cg25322008	11	4675714	66	OR51E2	FALSE
cg12370791	17	44058649	67	HOXB9	TRUE	17:44057124-44059246
cg12585943	6	32229346	67	PPT2	TRUE	6:32228589-32230636
cg04716261	1	2927859	67	ARPM2	FALSE
cg27132814	20	18742303	67	C20orf79	FALSE
cg02046532	20	155858	67	DEFB129	FALSE
cg02633817	19	40298572	67	FXYD3	FALSE
cg14120436	15	50270790	67	GNB5	FALSE
cg15092802	9	137577873	67	OBP2A	FALSE
cg04491443	16	20323467	67	PDILT	FALSE
cg06490951	18	570435	68	CETN1	TRUE	18:570046-571049
cg16666160	9	126309452	68	NR5A1	TRUE	9:126309430-126309676
cg04048249	11	116205766	68	APOC3	FALSE
cg06434428	5	83052386	68	HAPLN1	FALSE
cg16097772	12	68028499	68	LYZ	FALSE
cg08539093	9	135074381	68	OBP2B	FALSE
cg26232558	17	3142558	68	OR3A1	FALSE
cg12731488	X	37778155	68	SYTL5	FALSE
cg17078393	1	32489589	69	LCK	TRUE	1:32489393-32489639
cg17501569	16	751065	69	MSLN	TRUE	16:750966-751193
cg03679581	9	5294511	69	RLN2	TRUE	9:5293703-5294659
cg12485992	17	3321721	69	SPATA22	TRUE	17:3321498-3322570
cg16545105	5	76284505	69	CRHBP	FALSE
cg07123548	19	45588003	69	HIPK4	FALSE
cg20582779	1	220787998	69	KIAA1822L	FALSE
cg02649337	X	148671471	69	MAGEA9	FALSE
cg26389232	15	22847786	69	PWCR1	FALSE
cg16536450	9	138778717	69	UNQ2541	FALSE
cg20015855	15	66724616	70	CORO2B	TRUE	15:66724510-66724769
cg03665457	10	38685382	70	LOC158160	TRUE	10:38684978-38685687
cg03557733	17	39340709	70	MPP2	TRUE	17:39339717-39340797
cg23174481	19	7468555	70	FLJ35784	FALSE
cg21105318	2	160764766	70	ITGB6	FALSE
cg27566805	1	214663431	70	USH2A	FALSE
cg00983520	22	49363933	71	CPT1B	TRUE	22:49362955-49363937
cg00546491	7	32077587	71	PDE1C	TRUE	7:32076278-32077689
cg21602160	17	38256798	71	AOC3	FALSE
cg18942631	1	116112864	71	CASQ2	FALSE
cg05761971	2	38031181	71	FAM82A	FALSE
cg15750705	1	34999294	71	GJB4	FALSE
cg19728577	1	42391750	71	GUCA2B	FALSE
cg05674036	17	3270541	71	OR3A3	FALSE
cg10379687	20	43609371	71	SPINLW1	FALSE
cg02284188	11	89181320	71	TRIM49	FALSE
cg18582689	6	55300297	71	UNQ9356	FALSE
cg21589115	19	54558926	72	DKKL1	TRUE	19:54557784-54559479
cg24330042	22	22714159	72	GSTT1	TRUE	22:22713988-22714557
cg23988310	2	224175293	72	SCG2	TRUE	2:224175201-224175460
cg04211807	X	73440678	72	ZCCHC13	TRUE	X:73440299-73441439
cg10235741	3	58175366	72	DNASE1L3	FALSE
cg02847216	18	18251801	73	CTAGE1	TRUE	18:18251775-18252151
cg25042226	2	113753041	73	PAX8	TRUE	2:113752884-113753146
cg09276978	20	34428931	73	DLGAP4	FALSE
cg17687962	19	56050056	73	KLK3	FALSE
cg03977657	1	207892370	73	LAMB3	FALSE
cg02261346	22	42229926	73	MPPED1	FALSE
cg09196942	1	12774206	73	PRAMEF1	FALSE
cg14898892	4	77575204	73	SHRM	FALSE
cg24845207	1	53697586	74	DMRTB1	TRUE	1:53697537-53699201
cg20451680	5	54317093	74	ESM1	TRUE	5:54316863-54317280
cg26756083	8	89408738	74	MMP16	TRUE	8:89408485-89410162
cg03986640	12	55134622	74	MIP	FALSE
cg03075662	3	147696338	74	PLSCR2	FALSE
cg03242666	17	15109295	74	PMP22	FALSE
cg06025017	1	180685841	74	RGSL2	FALSE
cg18109798	12	20739740	74	SLCO1C1	FALSE
cg20312228	3	127596397	75	CCDC37	TRUE	3:127595793-127596808
cg07015629	2	213111457	75	ERBB4	TRUE	2:213109348-213112340
cg17542495	X	70359726	75	GJB1	TRUE	X:70359536-70359838
cg03399459	10	47217088	75	ANXA8	FALSE
cg18920846	11	8921081	75	ASCL3	FALSE
cg21686987	16	73810474	75	CTRB1	FALSE
cg21045388	1	15300759	75	FLJ43806	FALSE
cg27592112	15	25343690	75	GABRG3	FALSE
cg14920334	12	4700088	75	GALNT8	FALSE
cg12795208	12	51132205	75	KRT6B	FALSE
cg00644033	7	100382640	75	MUC3B	FALSE
cg18484189	11	7941549	75	NALP10	FALSE
cg03533058	12	50723838	75	NR4A1	FALSE
cg05998426	11	65860501	75	RIN1	FALSE
cg19017177	19	55833039	75	SYT3	FALSE
cg18182399	2	219991419	76	DES	TRUE	2:219991189-219992151
cg05807991	4	118226256	76	TRAM1L1	TRUE	4:118225823-118226399
cg02097420	3	187866568	76	HRG	FALSE
cg21085768	16	2807089	76	PRSS21	FALSE
cg08495878	14	94097612	76	SERPINA4	FALSE
cg17356252	21	44530114	77	AIRE	TRUE	21:44529970-44530564
cg11825652	7	115926603	77	CAV2	TRUE	7:115926599-115927758
cg02204046	2	15998211	77	MYCN	TRUE	2:15997151-15998977
cg00462994	17	39437481	77	NAGS	TRUE	17:39437410-39438278
cg13490635	8	30361563	77	RBPMS	TRUE	8:30360792-30362964
cg22495124	17	62303990	77	CACNG5	FALSE
cg11944101	X	135558079	77	CD40LG	FALSE
cg12285118	10	14856979	77	FAM107B	FALSE
cg21414251	6	29472533	77	OR12D2	FALSE
cg12163490	16	63713342	78	CDH11	TRUE	16:63711989-63713859
cg26687173	19	38314931	78	LOC126248	TRUE	19:38314510-38315181
cg11991859	14	32478278	78	NPAS3	TRUE	14:32477318-32479136
cg12564453	16	55553341	78	CETP	FALSE
cg18931815	1	36338359	78	COL8A2	FALSE
cg00071250	1	170894886	78	FASLG	FALSE
cg05131835	17	59312877	78	GH2	FALSE
cg17784922	7	142369547	78	KEL	FALSE
cg17405586	12	51360524	78	KRT1	FALSE
cg18982568	12	51383436	78	KRT1B	FALSE
cg19823847	6	138581399	78	PBOV1	FALSE
cg06190732	14	94148389	78	SERPINA3	FALSE
cg17589341	18	41558077	78	SLC14A1	FALSE
cg07911673	17	8138817	78	SLC25A35	FALSE
cg13998904	3	141879493	78	TRIM42	FALSE
cg00718513	2	88996387	78		FALSE
cg26059153	20	13924190	79	C20orf133	TRUE	20:13923655-13925157
cg01743008	X	151672941	79	MAGEA2	TRUE	X:151672876-151673193
cg26220985	1	166964973	79	DPT	FALSE
cg21466821	19	45588013	79	HIPK4	FALSE
cg01074640	9	21218142	79	IFNA17	FALSE
cg23256150	12	99391889	79	NR1H4	FALSE
cg27472295	6	83130338	80	TPBG	TRUE	6:83129980-83132165
cg08826839	2	162808371	80	FAP	FALSE
cg12624523	6	24597749	80	GPLD1	FALSE
cg18971054	7	141342228	80	MGAM	FALSE
cg01429391	14	22974770	80	MYH7	FALSE
cg00727590	22	29866549	80	PLA2G3	FALSE
cg21649520	8	82522354	80	PMP2	FALSE
cg12114524	1	199657417	80	TNNI1	FALSE
cg24454579	19	58486606	81	BIRC8	TRUE	19:58485716-58486658
cg16072462	4	75066622	81	PF4	TRUE	4:75066388-75066770
cg13520715	21	42008923	81	C21orf129	FALSE
cg05389024	2	170074377	81	KBTBD10	FALSE
cg10117369	1	202000879	81	LAX1	FALSE
cg20059312	2	233586101	81	NGEF	FALSE
cg26922202	9	35947984	81	OR2S2	FALSE
cg02658214	12	55614231	81	SDR-O	FALSE
cg14473145	14	37795407	82	CLEC14A	TRUE	14:37793841-37795561
cg26822175	22	25348010	82	CRYBA4	FALSE
cg06956273	1	109957146	82	GNAT2	FALSE
cg04200192	3	185232108	82	HTR3D	FALSE
cg12788313	3	49701181	82	MST1	FALSE
cg08763351	1	151209834	82	SPRR4	FALSE
cg05342835	1	32933378	82	SYNC1	FALSE
cg03716937	8	39815019	83	ADAM2	TRUE	8:39814758-39815055
cg17188169	6	74161109	83	DDX43	TRUE	6:74160911-74162067
cg13269407	22	44828771	83	FLJ10945	TRUE	22:44828342-44828882
cg09272256	10	5228881	83	AKR1C4	FALSE
cg00283535	8	124818745	83	ANXA13	FALSE
cg21148892	2	70901157	83	CLEC4F	FALSE
cg26424956	6	34209504	83	GRM4	FALSE
cg19403377	17	51155224	83	TMEM100	FALSE
cg03704031	X	70628940	84	INGX	TRUE	X:70628205-70629896
cg06577725	3	174341611	84	SPATA16	TRUE	3:174341533-174341882
cg11698653	4	177427185	84	ASB5	FALSE
cg12864581	1	31433503	84	FAM77C	FALSE
cg01255591	20	42399124	84	R3HDML	FALSE
cg02005755	7	135063389	84	SLC13A4	FALSE
cg14934821	9	138348641	85	GPSM1	TRUE	9:138348614-138348948
cg08370996	15	94675035	85	NR2F2	TRUE	15:94674239-94677008
cg19668234	3	46734453	85	TSP50	TRUE	3:46733944-46734676
cg27050763	1	245148217	85	AHCTF1	FALSE
cg20610181	9	35664000	85	CA9	FALSE
cg06589885	1	144124550	85	HFE2	FALSE
cg18096388	2	242449646	85	PDCD1	FALSE
cg00406844	22	31083939	85	RFPL3	FALSE
cg00679556	6	30188761	85	TRIM31	FALSE
cg25383242	16	74901164	86	CNTNAP4	TRUE	16:74901143-74901361
cg24178740	2	219558709	86	FEV	TRUE	2:219557927-219558922
cg22815534	22	16026263	86	CECR5	FALSE
cg26673195	17	38306255	86	G6PC	FALSE
cg15423764	11	58256109	86	GLYAT	FALSE
cg11465372	12	51457458	86	KRT2B	FALSE
cg10173075	15	87565840	86	RLBP1	FALSE
cg20804101	12	242177	86	SLC6A13	FALSE
cg12238343	5	33972159	87	RLN3R1	TRUE	5:33971758-33974643
cg14014225	22	36809182	87	SLC16A8	TRUE	22:36809096-36809364
cg04592706	1	94359180	87	ABCA4	FALSE
cg14662172	13	45577082	87	CPB2	FALSE
cg00619207	1	111544891	87	DENND2D	FALSE
cg04484789	17	36181850	87	KRT25B	FALSE
cg26917999	8	20157170	87	LZTS1	FALSE
cg26041297	11	61766387	87	SCGB1D2	FALSE
cg25593948	6	50894629	87	TFAP2B	FALSE
cg20098659	12	10074631	88	CLEC9A	TRUE	12:10074303-10074654
cg06899808	X	151617989	88	MAGEA6	TRUE	X:151617742-151618072
cg25651984	X	140819258	88	MAGEC1	TRUE	X:140819187-140819447
cg12053284	18	39111254	88	SYT4	TRUE	18:39111149-39111533
cg13164537	18	65775051	88	CD226	FALSE
cg06933965	12	107257124	88	CMKLR1	FALSE
cg14078518	4	80548308	88	GK2	FALSE
cg06141025	12	21648733	88	GYS2	FALSE
cg12460359	12	10451544	88	KLRK1	FALSE
cg20862119	12	51457284	88	KRT2B	FALSE
cg11456838	6	159198742	88	LOC202459	FALSE
cg16725130	12	54522914	88	MMP19	FALSE
cg25112191	1	150070884	88	RORC	FALSE
cg25148589	4	158361386	89	GRIA2	TRUE	4:158360778-158361481
cg10328573	17	36981747	89	KRT9	TRUE	17:36981530-36981751
cg15214092	17	77280901	89	MRPL12	TRUE	17:77279932-77281470
cg02440177	19	58188507	89	ZNF702	TRUE	19:58187792-58189007
cg07011110	6	26608461	89	BTN1A1	FALSE
cg00466436	20	71163	89	DEFB126	FALSE
cg08816023	5	142045723	89	FGF1	FALSE
cg16204289	2	75650267	89	FLJ13391	FALSE
cg22960952	4	76700193	89	FLJ23657	FALSE
cg12694870	12	120781063	89	HPD	FALSE
cg08906015	19	51849665	89	MGC15476	FALSE
cg07810156	1	47428269	89	PDZK1IP1	FALSE
cg21578541	3	52235130	89	TLR9	FALSE
cg24643262	X	15428783	90	BMX	TRUE	X:15428757-15429114
cg09715672	10	88718258	90	C10orf116	TRUE	10:88717963-88718893
cg04545708	11	111255565	90	C11orf1	FALSE
cg12827188	4	155731437	90	FGA	FALSE
cg24922045	17	31104100	90	GAS2L2	FALSE
cg18806980	16	82995624	90	KIAA0703	FALSE
cg22643217	21	31175835	90	KRTAP11-1	FALSE
cg21961766	19	54778190	90	PRRG2	FALSE
cg13461622	1	25163972	90	RUNX3	FALSE
cg11854877	X	153767738	91	F8A1	TRUE	X:153767233-153768860
cg02248486	7	27149721	91	HOXA5	TRUE	7:27147983-27152159
cg23812886	X	47941234	91	SSX5	TRUE	X:47941128-47941340
cg14561282	4	176076043	91	ADAM29	FALSE
cg09120035	8	143958147	91	CYP11B1	FALSE
cg18740800	11	27871510	91	HSPCAL3	FALSE
cg17386181	16	55243403	91	MT1B	FALSE
cg18704047	5	59819425	91	PART1	FALSE
cg08747377	16	81218171	92	CDH13	TRUE	16:81217810-81219323
cg26656113	4	73116477	92	NPFFR2	TRUE	4:73116364-73116958
cg12078929	22	41226632	92	SERHL	TRUE	22:41225823-41227067
cg00168942	10	35934436	92	CX40.1	FALSE
cg25623640	4	71751036	92	IGJ	FALSE
cg22290566	15	72892339	92	LMAN1L	FALSE
cg23324787	11	36576270	92	RAG2	FALSE
cg01171858	16	31401848	92	SLC5A2	FALSE
cg27488807	5	147672091	92	SPINK7	FALSE
cg23910243	16	31392119	92	TGFB1I1	FALSE
cg23181170	5	170143250	93	GABRP	FALSE
cg01333788	1	34993401	93	GJB5	FALSE
cg24926276	19	4490943	93	LRG1	FALSE
cg01941619	18	28024079	93	MEP1B	FALSE
cg03264414	9	137593518	93	PAEP	FALSE
cg11037787	1	20179589	93	PLA2G2A	FALSE
cg23504707	14	59782316	93	PPM1A	FALSE
cg20798152	5	71050656	94	CART	TRUE	5:71050507-71051626
cg03544320	4	5945592	94	CRMP1	TRUE	4:5944246-5946191
cg14695751	2	202379537	94	ALS2CR7	FALSE
cg07237830	11	62231301	94	BSCL2	FALSE
cg09212468	16	56286133	94	C16orf50	FALSE
cg02010852	9	125158176	94	CRB2	FALSE
cg12167564	1	234113657	94	LYST	FALSE
cg02601403	17	31616166	94	TBC1D3C	FALSE
cg26293512	16	56567934	94	TEPP	FALSE
cg05942970	10	133805517	95	C10orf39	TRUE	10:133805370-133805647
cg04245402	19	702241	95	C19orf21	TRUE	19:702077-702289
cg10707565	10	17211701	95	CUBN	FALSE
cg15512851	6	37081496	95	FGD2	FALSE
cg08504583	13	77213585	95	FLJ30046	FALSE
cg11295113	11	71605586	95	FOLR2	FALSE
cg18862260	2	190635795	95	GDF8	FALSE
cg23737768	17	36113623	95	KRT24	FALSE
cg10364182	11	36572574	95	LOC119710	FALSE
cg25366404	6	40003338	95	MOCS1	FALSE
cg20862496	8	143820736	95	SLURP1	FALSE
cg20625138	1	7836254	95	UTS2	FALSE
cg15439862	18	26876591	96	DSC3	TRUE	18:26874977-26877256
cg17687282	3	139333801	96	A4GNT	FALSE
cg07125166	3	48388617	96	FBXW12	FALSE
cg18448480	15	20806779	96	FLJ35785	FALSE
cg23173455	22	21318684	96	GGTL4	FALSE
cg17385448	1	15784289	97	AGMAT	TRUE	1:15783195-15784298
cg25650811	7	31523600	97	LOC223075	TRUE	7:31523575-31524017
cg11706111	16	70080645	97	ZNF19	TRUE	16:70080524-70081125
cg07047653	12	48630893	97	AQP2	FALSE
cg24197445	3	168528567	97	FLJ23049	FALSE
cg11692021	12	6819733	97	GNB3	FALSE
cg06324671	21	30855382	97	KRTAP19-7	FALSE
cg12584889	X	102234581	97	NXF3	FALSE
cg09134726	19	792082	97	PRTN3	FALSE
cg10331038	1	173642651	97	TNR	FALSE
cg01753906	14	105211235	97		FALSE
cg10221501	16	65157895	98	CMTM1	TRUE	16:65157441-65158454
cg14473924	3	73756860	98	PDZRN3	TRUE	3:73755774-73757236
cg10275770	17	59437937	98	ICAM2	FALSE
cg04818845	1	6502754	98	PLEKHG5	FALSE
cg10874403	3	87408525	98	POU1F1	FALSE
cg07499072	5	52812451	99	FST	TRUE	5:52811100-52812543
cg25072962	11	60281151	99	MGC35295	TRUE	11:60280945-60281190
cg24384676	14	36711715	99	SLC25A21	TRUE	14:36710824-36711766
cg19305227	15	43331627	99	SLC28A2	TRUE	15:43331294-43331673
cg00295325	2	169596178	99	ABCB11	FALSE
cg25943702	22	48604357	99	BRD1	FALSE
cg13281868	6	53991847	99	C6orf142	FALSE
cg04297093	21	30786245	99	KRTAP19-3	FALSE
cg02347114	2	99238101	99	LYG2	FALSE
cg18023080	1	11029971	99	MASP2	FALSE
cg10046892	1	154484566	99	PAQR6	FALSE
cg15590780	1	214663262	99	USH2A	FALSE
cg10000775	4	186693550	100	PDLIM3	TRUE	4:186692804-186694021
cg05208878	22	21231596	100	PRAME	TRUE	22:21231241-21231747
cg08668790	19	62912474	100	ZNF154	TRUE	19:62911404-62912681
cg15603885	8	107851549	100	ABRA	FALSE
cg08141989	17	7023286	100	ASGR1	FALSE
cg06226384	17	62303813	100	CACNG5	FALSE
cg24908058	19	54239014	100	CGB5	FALSE
cg18552413	1	157441234	100	DARC	FALSE
cg19404979	19	53189843	100	ELSPBP1	FALSE
cg10834677	1	113064812	100	FAM19A3	FALSE
cg11130441	2	38211651	100	MGC34824	FALSE
cg19635695	10	95362435	100	PDE6C	FALSE
cg10784341	6	143970993	100	PHACTR2	FALSE
cg13997435	1	151805030	100	S100A2	FALSE
cg06614002	22	36710385	100	SOX10	FALSE
cg14366490	19	17432825	100	TXNL6	FALSE
cg21349901	7	4597044	101	ERVK6	TRUE	7:4596914-4597240
cg05047411	X	148770553	101	MAGEA8	TRUE	X:148770535-148770742
cg25720804	5	170668994	101	TLX3	TRUE	5:170667594-170672661
cg07664856	3	1109528	101	CNTN6	FALSE
cg25778166	1	169326559	101	FMO3	FALSE
cg00344372	4	3413423	101	HGFAC	FALSE
cg14209518	11	113671846	101	NNMT	FALSE
cg27324619	22	29848860	101	PIB5PA	FALSE
cg14252059	11	120478484	101	TECTA	FALSE
cg05275605	21	45669311	102	C21orf123	TRUE	21:45669125-45669487
cg26153631	12	52665323	102	HOXC10	TRUE	12:52664872-52666801
cg24887211	14	76362378	102	C14orf166B	FALSE
cg09256683	17	31337750	102	CCL14	FALSE
cg01541443	7	30151840	102	Ells1	FALSE
cg23773532	12	12994483	102	GPRC5D	FALSE
cg14377791	19	44861752	102	LOC400696	FALSE
cg14792155	15	40076910	102	PLA2G4E	FALSE
cg23338993	2	234265162	102	UGT1A6	FALSE
cg10088985	4	75083177	103	CXCL5	TRUE	4:75082831-75083358
cg11234457	5	121215446	103	FTMT	TRUE	5:121215121-121216200
cg08463485	3	123223617	103	ILDR1	TRUE	3:123223586-123224478
cg25004981	15	98902551	103	LASS3	TRUE	15:98901825-98902776
cg05921324	11	116199324	103	APOA4	FALSE
cg24276445	6	88911672	103	CNR1	FALSE
cg09702010	19	56223205	103	KLK11	FALSE
cg07842062	16	3246525	103	MEFV	FALSE
cg06388544	1	25471465	103	RHD	FALSE
cg27160701	12	53534691	103	SBEM	FALSE
cg18509435	18	57308859	104	CDH20	TRUE	18:57308846-57309047
cg00600110	X	8729528	104	FAM9A	TRUE	X:8729086-8729604
cg05594230	X	70629128	104	INGX	TRUE	X:70628205-70629896
cg16390856	X	151688792	104	MAGEA3	TRUE	X:151688663-151689075
cg04887278	6	83960646	104	RWDD2	TRUE	6:83959185-83960964
cg14088811	11	47356570	104	SPI1	TRUE	11:47356386-47356586
cg21207436	14	73885069	104	C14orf115	FALSE
cg04498679	6	32003577	104	C2	FALSE
cg00520708	5	134209165	104	FLJ37562	FALSE
cg08815403	4	88463166	104	HSD17B13	FALSE
cg21375825	2	136311116	104	LCT	FALSE
cg11394785	5	179153696	104	LTC4S	FALSE
cg06958211	15	38319472	104	PAK6	FALSE
cg08365982	3	8750601	105	CAV3	TRUE	3:8750552-8750774
cg22161476	4	163304531	105	FSTL5	TRUE	4:163304513-163305102
cg02854090	6	25834874	105	HIST1H2AA	TRUE	6:25834320-25834896
cg17277939	12	68379275	105	MGC13168	TRUE	12:68379242-68379452
cg11759378	3	110518159	105	DPPA2	FALSE
cg11873854	9	138762696	105	LCN6	FALSE
cg25481253	7	141319853	105	TAS2R38	FALSE
cg21066636	17	4622041	105	TM4SF5	FALSE
cg27344326	X	72014529	106	DMRTC1	TRUE	X:72014516-72014901
cg03478689	5	83716473	106	EDIL3	TRUE	5:83715224-83716675
cg02602411	9	103396998	106	PPP3R2	TRUE	9:103396568-103397298
cg09952204	5	80292420	106	RASGRF2	TRUE	5:80291476-80292927
cg21126943	19	46951235	106	CEACAM6	FALSE
cg07443748	22	15453594	106	CESK1	FALSE
cg04290964	13	76462690	106	CLN5	FALSE
cg19984039	1	190872011	106	RGS13	FALSE
cg23464269	2	234302406	106	UGT1A3	FALSE
cg20507276	1	246167223	107	OR2L13	TRUE	1:246166629-246167405
cg13191808	1	55277915	107	PCSK9	TRUE	1:55277514-55279106
cg17919471	X	52913717	107	XAGE3	TRUE	X:52913338-52913733
cg12832565	1	144427029	107	CD160	FALSE
cg07258507	14	22911965	107	IL17E	FALSE
cg21518208	12	51047683	107	KRTHB5	FALSE
cg24812167	9	138413179	107	SNAPC4	FALSE
cg12718562	15	71952914	107	TBC1D21	FALSE
cg21723486	3	190832017	107	TP73L	FALSE
cg03453449	12	94469251	107	USP44	FALSE
cg03872376	1	236120451	107	ZP4	FALSE
cg16495265	17	44026009	108	HOXB5	TRUE	17:44025432-44027432
cg08418111	11	18390321	108	LDHC	TRUE	11:18389965-18390649
cg00691625	9	126309628	108	NR5A1	TRUE	9:126309430-126309676
cg13370916	X	67784128	108	STARD8	TRUE	X:67784063-67784532
cg15514848	1	169484179	108	FMO1	FALSE
cg23205633	17	36587878	108	KRTAP4-2	FALSE
cg06791867	11	44837520	108	TSPAN18	FALSE
cg07356189	X	153176523	109	CXorf2	TRUE	X:153176146-153176720
cg22699362	2	118491897	109	FLJ10996	TRUE	2:118491433-118491912
cg09998591	11	2847978	109	KCNQ1DN	TRUE	11:2846828-2848015
cg04488521	5	178420322	109	ZNF354C	TRUE	5:178419646-178420866
cg21660130	1	16242830	109	CLCNKB	FALSE
cg13929970	4	15548960	109	FGFBP1	FALSE
cg21909391	3	189378916	109	FLJ42393	FALSE
cg04303901	12	96410443	109	NCRMS	FALSE
cg18328334	2	218516897	109	TNS1	FALSE
cg18573383	12	73889668	110	KCNC2	TRUE	12:73889130-73889725
cg22496683	4	155922060	110	MGC27016	TRUE	4:155921599-155922908
cg22467071	17	59817613	110	PECAM1	TRUE	17:59817605-59817882
cg05998983	10	74323455	110	OIT3	FALSE
cg09638834	6	150388190	110	RAET1L	FALSE
cg23111544	2	79200982	110	REG1A	FALSE
cg21137417	2	234624195	110	SPP2	FALSE
cg22802439	19	40849665	110	UPK1A	FALSE
cg19404582	9	139152774	111	GRIN1	TRUE	9:139152663-139154086
cg10193817	11	114880436	111	IGSF4	TRUE	11:114880058-114881146
cg17398613	21	42792922	111	SLC37A1	TRUE	21:42792735-42793017
cg24921858	12	12115256	111	BCL2L14	FALSE
cg25217765	6	90661020	111	CX62	FALSE
cg15662251	1	26070442	111	PAQR7	FALSE
cg26812418	4	166519426	112	CPE	TRUE	4:166519309-166520212
cg10009830	X	20044825	112	FLJ14503	TRUE	X:20043987-20046213
cg03562120	20	42777411	112	WISP2	TRUE	20:42777169-42777483
cg15475323	19	53911914	112	FLJ36070	FALSE
cg16001913	10	70699650	112	HK1	FALSE
cg01714932	12	9252121	112	PZP	FALSE
cg10533434	18	59480206	112	SERPINB3	FALSE
cg22776578	5	175156103	113	CPLX2	TRUE	5:175156069-175157465
cg14972143	4	100070026	113	EIF4E	TRUE	4:100068241-100070323
cg15554401	1	34999478	113	GJB4	TRUE	1:34999454-35000017
cg16685388	1	42156643	113	HIVEP3	TRUE	1:42156050-42156783
cg15584813	12	45505893	113	SLC38A4	TRUE	12:45505775-45506259
cg03330516	20	61649188	113	SRMS	TRUE	20:61648644-61649388
cg25799986	20	43531695	113	WFDC2	TRUE	20:43531570-43532140
cg19014419	5	150264697	113	ZNF300	TRUE	5:150264280-150264992
cg05666713	1	199448506	113	DKFZp434B1231	FALSE
cg13131015	12	14740809	113	GUCY2C	FALSE
cg11554937	9	98104142	113	HSD17B3	FALSE
cg12493906	11	4965887	113	MMP26	FALSE
cg02721374	17	2942927	113	OR1D2	FALSE
cg08634024	7	143288110	113	OR2F1	FALSE
cg01293143	20	62158770	113	TCEA2	FALSE
cg04963951	5	121215663	114	FTMT	TRUE	5:121215121-121216200
cg20748065	7	75421357	114	POR	TRUE	7:75421205-75421476
cg00410921	15	41672430	114	CKMT1B	FALSE
cg23815491	16	70646123	114	HP	FALSE
cg15521097	X	54841284	114	ITIH5L	FALSE
cg07014174	21	31175631	114	KRTAP11-1	FALSE
cg21624282	13	112078784	114	LOC122258	FALSE
cg04091078	12	20739552	114	SLCO1C1	FALSE
cg15582891	6	133008721	114	TAAR1	FALSE
cg23242898	18	48121271	115	DCC	TRUE	18:48120150-48121583
cg07484450	11	60139937	115	MGC39681	TRUE	11:60139614-60139953
cg03923277	12	102883862	115	TDG	TRUE	12:102883345-102884290
cg09405083	10	104526111	115	C10orf26	FALSE
cg20416179	6	150731836	115	C6orf71	FALSE
cg05484458	12	6819521	115	GNB3	FALSE
cg13882988	10	54201351	115	MBL2	FALSE
cg17625032	16	55612241	115	NOD27	FALSE
cg05828624	2	79201207	115	REG1A	FALSE
cg27496506	15	41346462	115	TGM5	FALSE
cg10832945	2	240164816	116	FLJ45964	TRUE	2:240164680-240164900
cg19224837	14	94306368	116	GSC	TRUE	14:94304190-94306783
cg16551261	8	133757111	116	LRRC6	TRUE	8:133755977-133757274
cg23900225	10	35934228	116	CX40.1	FALSE
cg21979032	3	42892521	116	CYP8B1	FALSE
cg09841009	4	145281410	116	GYPA	FALSE
cg27214365	4	145160062	116	GYPB	FALSE
cg16998872	4	145046282	116	GYPE	FALSE
cg19282250	9	78518342	116	KIAA0367	FALSE
cg23350580	17	31616188	116	TBC1D3C	FALSE
cg13912117	8	132123737	117	ADCY8	TRUE	8:132120798-132124201
cg23504246	15	47502634	117	FGF7	FALSE
cg19807685	16	80626481	117	HSD17B2	FALSE
cg11498156	10	102880135	117	TLX1	FALSE
cg03712237	X	52753092	118	SSX2	TRUE	X:52752914-52753142
cg05221167	19	9470397	118	ZNF560	TRUE	19:9469758-9470740
cg22022041	3	45903141	118	CCR9	FALSE
cg06625767	5	176769301	118	F12	FALSE
cg01446393	3	58538649	118	FAM107A	FALSE
cg03386869	13	100902849	118	ITGBL1	FALSE
cg15983005	17	36760464	118	KRTHA3A	FALSE
cg10125195	12	53314812	118	LACRT	FALSE
cg00534274	4	139382791	118	SLC7A11	FALSE
cg06236276	6	160600068	119	SLC22A2	TRUE	6:160600019-160600273
cg06793062	16	74901369	119	CNTNAP4	FALSE
cg16075940	6	109664391	119	FLJ37396	FALSE
cg00042156	10	42290848	119	MGC16291	FALSE
cg00729875	1	99884301	119	PALMD	FALSE
cg08385610	8	20156963	120	LZTS1	TRUE	8:20156750-20157009
cg06458239	19	62730385	120	ZNF549	TRUE	19:62730278-62731195
cg01888601	11	47692758	120	AGBL2	FALSE
cg25033144	19	59740102	120	FLJ00060	FALSE
cg04749372	7	30758396	120	INMT	FALSE
cg11822932	11	33870292	120	LMO2	FALSE
cg15422147	18	59295319	120	SERPINB5	FALSE
cg15480475	11	8016636	120	TUB	FALSE
cg05248781	1	150749823	121	LCE5A	FALSE
cg20357806	4	75072643	121	PPBP	FALSE
cg05953243	11	26700001	121	SLC5A12	FALSE
cg11052143	2	202192265	122	ALS2CR11	TRUE	2:202191787-202192348
cg19394737	2	219600605	122	DKFZp434O0527	TRUE	2:219600581-219600781
cg09448875	10	101532439	122	ABCC2	FALSE
cg21407055	11	3623059	122	ART1	FALSE
cg02100848	3	8668859	122	C3orf32	FALSE
cg07548313	1	156526550	122	CD1C	FALSE
cg00534856	19	54219283	122	CGB	FALSE
cg17890764	3	52839856	122	ITIH4	FALSE
cg00550617	17	36659343	122	KRTAP9-4	FALSE
cg16739580	3	192661768	122	POP2	FALSE
cg01407341	15	95127802	122	SPATA8	FALSE
cg07007400	12	50913098	123	KRT7	TRUE	12:50912973-50913926
cg25142416	8	86477471	123	CA1	FALSE
cg14238120	1	22200613	123	ELA3A	FALSE
cg06323290	10	70699885	123	HK1	FALSE
cg00091693	17	36295128	123	KRT20	FALSE
cg11134443	2	143351788	123	KYNU	FALSE
cg18920397	1	159032429	123	LY9	FALSE
cg23278885	20	2309431	123	TGM6	FALSE
cg22767466	11	89181514	123	TRIM49	FALSE
cg25989745	9	12683326	123	TYRP1	FALSE
cg10923408	13	30404710	124	MGC40178	TRUE	13:30404651-30404896
cg13601079	X	48101219	124	SSX3	TRUE	X:48101042-48101416
cg18433694	X	138742237	124	ATP11C	FALSE
cg10569414	21	42315323	124	C21orf121	FALSE
cg23414387	1	47037453	124	CYP4B1	FALSE
cg09179743	9	27514436	124	IFNK	FALSE
cg26960719	17	65582897	124	KCNJ16	FALSE
cg04802221	16	65781456	124	LOC283849	FALSE
cg24867501	22	49272203	124	MIOX	FALSE
cg19320612	2	166876436	124	SCN9A	FALSE
cg15470298	21	45649650	125	COL18A1	TRUE	21:45648881-45650628
cg15550350	3	142979858	125	GRK7	TRUE	3:142979763-142980161
cg19502744	2	31659419	125	SRD5A2	TRUE	2:31658633-31660643
cg20556988	17	29714240	125	CCL1	FALSE
cg17638468	3	114176752	125	CD200R1	FALSE
cg12531542	11	75106707	125	MOGAT2	FALSE
cg13904968	20	55569418	125	PCK1	FALSE
cg03835296	6	25938901	125	SLC17A1	FALSE
cg14533138	17	36779447	126	KRTHA3B	TRUE	17:36779251-36779455
cg03780733	5	140532553	126	PCDHB7	TRUE	5:140532532-140532807
cg27655855	20	23497455	126	CST9L	FALSE
cg17119559	X	19010911	126	GPR64	FALSE
cg22182945	4	71235172	126	NYD-SP26	FALSE
cg18133966	12	119250101	126	PLA2G1B	FALSE
cg08658594	12	10953302	126	TAS2R13	FALSE
cg16540704	7	116854652	127	ASZ1	TRUE	7:116854400-116855316
cg05996238	X	55132095	127	PAGE2	TRUE	X:55131941-55132321
cg20858526	1	15637652	127	CTRC	FALSE
cg00436603	10	135190730	127	CYP2E1	FALSE
cg05722906	19	15644791	127	CYP4F12	FALSE
cg14871544	18	27281883	127	DSG3	FALSE
cg05316065	8	130868189	127	MLZE	FALSE
cg06119575	9	107464726	127	TAL2	FALSE
cg20802392	1	149047308	128	CTSK	TRUE	1:149047294-149047502
cg22376897	X	2892183	128	ARSE	FALSE
cg13742532	3	42825852	128	CCBP2	FALSE
cg09034896	13	113369467	128	GRK1	FALSE
cg08899626	4	16509297	128	LDB2	FALSE
cg27349244	12	121177872	128	MLXIP	FALSE
cg04810997	7	142850796	128	TAS2R60	FALSE
cg17091851	16	68542440	129	LOC348174	TRUE	16:68542384-68542590
cg14127336	14	95250072	129	TCL1A	TRUE	14:95249952-95250699
cg02477931	11	131037931	129	C11orf39	FALSE
cg16831889	15	48345343	129	HDC	FALSE
cg19409156	15	46200332	129	SLC24A5	FALSE
cg17950095	7	27191225	130	HOXA11	TRUE	7:27189699-27192279
cg14256699	17	39191552	130	SOST	TRUE	17:39191384-39191613
cg25221625	22	23925955	130	CRYBB3	FALSE
cg13735697	1	201321919	130	MYOG	FALSE
cg15465321	X	119176625	130	PEPP-2	FALSE
cg26628847	7	142539426	130	PIP	FALSE
cg04448487	20	42309191	131	GDAP1L1	TRUE	20:42309159-42309537
cg10212621	1	120113172	131	HMGCS2	FALSE
cg24098951	8	105670212	132	LRP12	TRUE	8:105669445-105671333
cg06637774	11	72653350	132	P2RY6	TRUE	11:72653070-72653635
cg24100167	6	160141423	132	PNLDC1	TRUE	6:160140818-160141595
cg12832649	5	136862762	132	SPOCK	TRUE	5:136861841-136863150
cg05699806	X	2994985	132	ARSF	FALSE
cg02953306	8	27392543	132	CHRNA2	FALSE
cg04567009	1	159867393	132	FCGR3B	FALSE
cg27168844	6	52159276	132	IL17	FALSE
cg08404225	3	3126899	132	IL5RA	FALSE
cg09558502	1	111772054	132	OVGP1	FALSE
cg13473336	16	31402072	132	SLC5A2	FALSE
cg05241571	19	40673064	132	UNQ467	FALSE
cg18441959	22	20929332	132	VPREB1	FALSE
cg08997253	9	103540550	133	GRIN3A	TRUE	9:103538958-103541050
cg07846220	18	7107680	133	LAMA1	TRUE	18:7106780-7108404
cg08431931	22	40724605	133	MGC26816	TRUE	22:40724449-40725364
cg13649728	4	128871157	133	SLC25A31	TRUE	4:128870686-128871573
cg06489008	20	23381349	133	CST11	FALSE
cg14818279	5	148422747	133	SH3TC2	FALSE
cg01197831	9	96395762	134	FBP2	TRUE	9:96395689-96395929
cg13482233	X	65299254	134	HEPH	FALSE
cg06771126	4	57242456	134	HOP	FALSE
cg06392096	19	59516087	134	LILRA5	FALSE
cg08859675	19	10424771	134	PDE4A	FALSE
cg18997129	7	142815972	135	EPHA1	TRUE	7:142815700-142816331
cg00862290	3	180467667	135	KCNMB3	TRUE	3:180467337-180467703
cg15052335	18	3001810	135	LPIN2	TRUE	18:3001266-3001831
cg02554564	12	5473392	135	NTF3	TRUE	12:5473265-5473465
cg21820890	10	74384381	135	PLA2G12B	TRUE	10:74384195-74384404
cg05820087	3	194755255	135	ATP13A4	FALSE
cg12071073	13	51334282	135	CCDC70	FALSE
cg20613889	2	49234999	135	FSHR	FALSE
cg06745740	7	81237523	135	HGF	FALSE
cg20311730	11	7941759	135	NALP10	FALSE
cg08572611	7	100091850	136	ACTL6B	TRUE	7:100091590-100092362
cg24461814	12	51065548	136	KRTHB4	FALSE
cg04756629	19	44861990	136	LOC400696	FALSE
cg02061229	11	102156418	136	MMP10	FALSE
cg17468997	7	74225559	136	NCF1	FALSE
cg10742801	10	135011037	136	PRAP1	FALSE
cg09508556	6	31214961	136	PSORS1C2	FALSE
cg02409351	12	84198153	137	CART1	TRUE	12:84196244-84198853
cg25140571	3	8786437	137	OXTR	TRUE	3:8783900-8786449
cg11896271	22	48951454	137	PANX2	TRUE	22:48949842-48951841
cg01781266	11	12355542	137	PARVA	TRUE	11:12355424-12356620
cg01931893	16	65141679	137	TK2	TRUE	16:65140431-65141764
cg14272706	2	201924284	137	ALS2CR12	FALSE
cg08399444	12	13139815	137	GSG1	FALSE
cg25020850	1	180908809	137	RGS8	FALSE
cg18338296	11	77452692	137	THRSP	FALSE
cg08521225	18	27425975	137	TTR	FALSE
cg02218324	19	51010279	138	RSHL1	TRUE	19:51010186-51011161
cg02533173	19	15252124	138	BRD4	FALSE
cg00729275	18	22699132	138	C18orf16	FALSE
cg04301614	4	37262388	138	FLJ11017	FALSE
cg04979933	1	67039389	138	INSL5	FALSE
cg20226764	6	33879909	138	MLN	FALSE
cg21765730	6	155818867	138	NOX3	FALSE
cg06144905	17	24393906	138	PIPOX	FALSE
cg05556202	3	197549503	138	TM4SF19	FALSE
cg23973000	5	112798426	139	TSSK1	TRUE	5:112797543-112798488
cg07361385	3	187813720	139	AHSG	FALSE
cg01479232	20	696992	139	C20orf54	FALSE
cg23756219	X	100361780	139	DRP2	FALSE
cg06531741	11	113280660	139	HTR3B	FALSE
cg04312209	5	35892887	139	IL7R	FALSE
cg12952132	19	60109459	139	NCR1	FALSE
cg15572745	14	77939985	139	NRXN3	FALSE
cg02442161	20	43237051	139	PI3	FALSE
cg04488758	12	94469497	139	USP44	FALSE
cg23595927	4	661851	140	MYL5	TRUE	4:661751-662107
cg20063650	X	22200841	140	ZNF645	TRUE	X:22200683-22200981
cg27043873	5	20017186	140	CDH18	FALSE
cg03625911	1	201422360	140	CHI3L1	FALSE
cg00573606	2	237987419	140	COL6A3	FALSE
cg10938486	16	20328217	140	FLJ20581	FALSE
cg02555579	22	16423043	140	SLC25A18	FALSE
cg16191009	3	9720369	141	CPNE9	TRUE	3:9720335-9722315
cg15842276	11	92342296	141	MTNR1B	TRUE	11:92342113-92343227
cg18135555	8	22188937	141	PIWIL2	TRUE	8:22188446-22189238
cg23440155	1	47037188	141	CYP4B1	FALSE
cg02212836	6	6534074	141	LY86	FALSE
cg13727946	19	8814473	141	MBD3L1	FALSE
cg10055471	1	27112906	141	NR0B2	FALSE
cg02863947	3	120981880	141	NR1I2	FALSE
cg02153528	12	54904915	141	OBFC2B	FALSE
cg03780486	11	6773856	141	OR6A2	FALSE
cg02192965	2	44356244	141	SLC3A1	FALSE
cg18087477	1	115199120	142	SYCP1	TRUE	1:115198808-115199527
cg19723473	2	168383286	142	B3GALT1	FALSE
cg05767404	1	245779214	142	C1orf150	FALSE
cg18822544	21	30614336	142	KRTAP26-1	FALSE
cg00396894	2	27215924	142	MGC44505	FALSE
cg22168676	6	10168766	142	OFCC1	FALSE
cg19530885	5	147238325	142	SCGB3A2	FALSE
cg26989103	8	110168758	142	TRHR	FALSE
cg07973461	21	10120665	143	BAGE	TRUE	21:10120532-10120763
cg20774846	8	105548596	143	DPYS	TRUE	8:105547672-105548659
cg01870826	7	5078401	143	LOC389458	TRUE	7:5078039-5078627
cg03554552	19	50599986	143	PPP1R13L	TRUE	19:50599756-50600150
cg21949781	18	41906364	143	PSTPIP2	TRUE	18:41905637-41906628
cg21519900	20	31134273	143	C20orf186	FALSE
cg06940107	21	28833654	143	C21orf100	FALSE
cg05232889	7	113842655	143	FOXP2	FALSE
cg04459030	20	35318563	143	GHRH	FALSE
cg15077070	2	102169722	143	IL1RL2	FALSE
cg03885639	11	123986520	143	PANX3	FALSE
cg03099771	6	27323344	143	PRSS16	FALSE
cg05633152	14	69333564	143	SLC10A1	FALSE
cg26418544	X	131990109	143	USP26	FALSE
cg21153758	5	52119749	144	ITGA1	TRUE	5:52119061-52120216
cg06288351	20	43163311	144	KCNS1	TRUE	20:43162871-43163401
cg16638540	19	63262280	144	ZNF135	TRUE	19:63262091-63264376
cg18534730	19	53239260	144	CABP5	FALSE
cg25107791	6	35872936	144	CLPS	FALSE
cg10503138	3	2117391	144	CNTN4	FALSE
cg17288121	8	7275424	144	DEFB103A	FALSE
cg13271951	16	29949261	144	FAM57B	FALSE
cg07265310	12	51529189	144	K5B	FALSE
cg17829936	6	132952374	144	TAAR5	FALSE
cg13859324	17	30498805	144	UNC45B	FALSE
cg15974053	19	54031601	145	DHRS10	TRUE	19:54031203-54031666
cg05766474	17	31332781	145	CCL16	FALSE
cg27235662	3	191588680	145	CLDN16	FALSE
cg13126790	6	159930336	145	FLJ27255	FALSE
cg02091100	6	42231007	145	GUCA1A	FALSE
cg21431536	13	31211824	145	LGR8	FALSE
cg23776892	X	152139132	145	MAGEA1	FALSE
cg21034676	5	135392451	146	TGFBI	TRUE	5:135392351-135393108
cg00234616	2	74594080	146	TLX2	TRUE	2:74593784-74597576
cg25391023	6	32482732	146	BTNL2	FALSE
cg23973566	6	24985708	146	C6orf32	FALSE
cg09422355	19	53238970	146	CABP5	FALSE
cg00463848	12	51332372	146	KRT2A	FALSE
cg05341878	8	104900822	146	RIMS2	FALSE
cg04962134	11	55409886	146	TRIM51	FALSE
cg05790038	17	3407893	146	TRPV3	FALSE
cg00685836	12	80677387	147	PPFIA2	TRUE	12:80676263-80677619
cg01684901	3	185541099	147	C3orf40	FALSE
cg25372195	12	53328560	147	DCD	FALSE
cg25475443	10	125796378	147	GALNAC4S-6ST	FALSE
cg01015871	16	55156689	147	MT4	FALSE
cg00582628	8	54927068	147	RGS20	FALSE
cg26379475	1	160648405	147	SH2D1B	FALSE
cg01227519	X	140614411	147	SPANXD	FALSE
cg17745122	16	52877731	148	IRX3	TRUE	16:52875064-52879466
cg20879768	18	42816134	148	TCEB3B	TRUE	18:42814915-42816200
cg22375610	6	41129139	148	APOBEC2	FALSE
cg14722162	5	134811085	148	C5orf20	FALSE
cg09509673	17	38087223	148	CCR10	FALSE
cg15775914	1	239865707	148	CHML	FALSE
cg04463638	22	17892712	148	CLDN5	FALSE
cg27626424	1	151498972	148	LOR	FALSE
cg26312920	7	31346915	148	NEUROD6	FALSE
cg15739437	5	110435437	148	TSLP	FALSE
cg06765947	3	127719432	148	UROC1	FALSE
cg04926244	12	24628518	149	FLJ32894	TRUE	12:24628322-24628716
cg12128839	7	27149961	149	HOXA5	TRUE	7:27147983-27152159
cg24500683	6	64339730	149	PTP4A1	TRUE	6:64339688-64341818
cg01830294	7	116750728	149	WNT2	TRUE	7:116749909-116752225
cg27183007	7	50103521	149	ZPBP	TRUE	7:50103013-50103606
cg09600520	6	4651243	149	CDYL	FALSE
cg16983159	5	138842625	149	LOC340061	FALSE
cg15798153	7	90176797	149	PFTK1	FALSE
cg13133883	10	85994640	149	RGR	FALSE
cg16465769	6	43374129	149	SLC22A7	FALSE
cg22445920	5	150663371	149	SLC36A3	FALSE
cg11667117	16	86527463	150	CA5A	TRUE	16:86526959-86527498
cg25021247	3	49435166	150	AMT	FALSE
cg25249068	3	134601630	150	BFSP2	FALSE
cg03620376	19	59676084	150	CDC42EP5	FALSE
cg03038672	16	3002057	150	CLDN9	FALSE
cg01612158	1	155834344	150	FCRL4	FALSE
cg26924825	16	66535366	150	LCAT	FALSE
cg04298323	10	95362185	150	PDE6C	FALSE
cg10752753	5	34020687	150	SLC45A2	FALSE
cg01564343	6	41229898	150	TREML1	FALSE
cg08977028	X	151653733	151	CSAG1	TRUE	X:151653717-151653951
cg01356829	1	67545484	151	IL12RB2	TRUE	1:67545435-67546605
cg00638514	17	70443643	151	OTOP3	TRUE	17:70443189-70444298
cg10242476	3	46594368	151	TDGF1	TRUE	3:46594072-46594386
cg20797216	19	8118234	151	FBN3	FALSE
cg17463527	20	41621251	151	SGK2	FALSE
cg11375102	16	1523811	152	C16orf30	TRUE	16:1523788-1524691
cg26026726	19	40554254	152	GPR42	TRUE	19:40554102-40554302
cg13439730	16	31054500	152	PRSS8	TRUE	16:31054357-31054558
cg24697329	2	131390846	152	ARHGEF4	FALSE
cg15227982	10	104525844	152	C10orf26	FALSE
cg00974864	1	159867677	152	FCGR3B	FALSE
cg21930712	19	56452928	152	FLJ40235	FALSE
cg06126510	5	22178370	152	PMCHL1	FALSE
cg14277764	5	70707520	152	PMCHL2	FALSE
cg15585987	8	50987302	152	SNTG1	FALSE
cg05492113	11	8016908	152	TUB	FALSE
cg04048259	20	57308741	153	EDN3	TRUE	20:57308563-57309693
cg20688340	10	127454227	153	MMP21	TRUE	10:127454134-127454336
cg27069753	1	22176158	153	ELA3B	FALSE
cg15729869	9	134447660	154	BARHL1	TRUE	9:134444863-134448377
cg17628717	7	43317733	154	HECW1	TRUE	7:43317647-43318185
cg05010967	6	44418618	154	SPATS1	TRUE	6:44418135-44418640
cg21591452	17	76919223	154	TMEM105	TRUE	17:76919186-76919387
cg03573747	3	188043311	154	ADIPOQ	FALSE
cg07543883	19	10074271	154	ANGPTL6	FALSE
cg01514487	12	55730314	154	MYO1A	FALSE
cg07126559	13	22652937	154	SGCG	FALSE
cg25218351	2	27358950	154	TRIM54	FALSE
cg14917512	19	3045685	155	GNA11	TRUE	19:3044235-3046095
cg05628549	11	6298471	155	PRKCDBP	TRUE	11:6297418-6298977
cg22972055	7	838819	155	UNC84A	TRUE	7:838536-838925
cg07634706	16	55996025	155	CCL17	FALSE
cg16122592	X	26120633	155	MAGEB6	FALSE
cg12286890	1	166779691	155	XCL2	FALSE
cg06132342	12	51047420	156	KRTHB5	TRUE	12:51046994-51047538
cg12629325	5	140286642	156	PCDHAC1	TRUE	5:140285591-140287803
cg10545682	1	149779249	156	TUFT1	TRUE	1:149779125-149780093
cg17504145	22	23947229	156	CRYBB2	FALSE
cg15583072	12	21416929	156	IAPP	FALSE
cg03296929	4	88939570	156	IBSP	FALSE
cg00138126	20	55720103	156	TMEPAI	FALSE
cg20191453	3	49434859	157	AMT	TRUE	3:49434750-49435011
cg26181372	9	103238083	157	ALDOB	FALSE
cg20312687	20	29420246	157	DEFB118	FALSE
cg07864297	14	75907322	157	ESRRB	FALSE
cg11504740	11	66976619	157	GPR152	FALSE
cg14948436	6	39398137	157	KCNK16	FALSE
cg13139843	21	30774664	157	KRTAP19-1	FALSE
cg03112433	7	90176491	157	PFTK1	FALSE
cg23514672	16	10696145	158	FLJ32871	TRUE	16:10695863-10696148
cg24477636	19	15780005	158	OR10H1	FALSE
cg18330203	1	199613270	158	TNNT2	FALSE
cg22368262	10	71060179	159	C10orf35	TRUE	10:71059654-71060479
cg23509027	X	151633853	159	CSAG3A	TRUE	X:151633606-151633920
cg23290344	8	24827371	159	NEF3	TRUE	8:24826692-24829288
cg20615832	4	74938036	159	PF4V1	TRUE	4:74937959-74938279
cg09697795	19	55358191	159	SCRL	TRUE	19:55357951-55358839
cg16722536	22	18124067	159	TBX1	TRUE	22:18123862-18124770
cg19685066	1	17954590	159	ACTL8	FALSE
cg18138484	11	67047602	159	CABP2	FALSE
cg03733371	3	186753222	159	LIPH	FALSE
cg16678925	17	3047722	159	OR1A2	FALSE
cg05590982	16	28457672	159	P8	FALSE
cg06403553	6	49862807	159	PGK2	FALSE
cg24240626	2	79240228	159	REG3A	FALSE
cg27226949	13	105985178	160	EFNB2	TRUE	13:105984303-105987145
cg25780543	7	154493703	160	HTR5A	TRUE	7:154493509-154494357
cg10862535	19	51218323	160	PGLYRP1	TRUE	19:51218309-51218565
cg06437862	13	18654096	160	TUBA2	TRUE	13:18653806-18654153
cg11706163	5	39400252	160	C9	FALSE
cg15914863	7	989201	160	CYP2W1	FALSE
cg07115820	17	53625248	160	EPX	FALSE
cg02901679	1	205012622	160	IL10	FALSE
cg04879235	17	39374388	160	PPY	FALSE
cg13994177	15	22847557	160	PWCR1	FALSE
cg24765446	20	43601388	160	WFDC6	FALSE
cg11525285	14	73776089	161	CHX10	TRUE	14:73776003-73778973
cg03258472	19	6414949	161	CRB3	TRUE	19:6414560-6415635
cg25531166	X	153500553	161	CTAG1B	TRUE	X:153500328-153500793
cg24713204	19	61711185	161	ZNF471	TRUE	19:61710502-61711930
cg21932814	3	123526862	161	CSTA	FALSE
cg13656062	19	15869723	161	CYP4F2	FALSE
cg18754342	12	14740535	161	GUCY2C	FALSE
cg06470471	3	54936951	161	LRTM1	FALSE
cg08191915	11	123986824	161	PANX3	FALSE
cg20892287	11	128399061	161	RICS	FALSE
cg14271690	20	36643413	161	SMAF1	FALSE
cg05740244	11	18390591	162	LDHC	TRUE	11:18389965-18390649
cg04167867	3	110319820	162	MORC1	TRUE	3:110319373-110319935
cg07730301	11	67534528	162	ALDH3B1	FALSE
cg15759873	2	46600438	162	ATP6V1E2	FALSE
cg03679734	15	41672382	162	CKMT1B	FALSE
cg10282491	16	3002369	162	CLDN9	FALSE
cg07434278	6	32114223	162	CYP21A2	FALSE
cg13870494	9	71848178	162	MAMDC2	FALSE
cg11721194	1	158975863	162	SLAMF7	FALSE
cg00126657	X	47852194	162	SSX6	FALSE
cg01325515	X	153534873	163	CTAG2	TRUE	X:153534625-153534975
cg07412254	2	120940004	163	FLJ14816	TRUE	2:120939973-120940445
cg07774025	1	161027283	163	HSD17B7	TRUE	1:161026796-161027514
cg09137696	16	55229916	163	MT1A	TRUE	16:55229309-55230226
cg26556134	12	51778996	163	SOAT2	FALSE
cg13854874	21	36679395	164	CHAF1B	TRUE	21:36679268-36680599
cg26049501	13	32758056	164	STARD13	TRUE	13:32757881-32758180
cg09547777	1	158426856	164	CASQ1	FALSE
cg14958018	8	41624199	164	FLJ25169	FALSE
cg14600885	5	150020473	164	MYOZ3	FALSE
cg19233472	5	169465330	165	FOXI1	TRUE	5:169465139-169465394
cg03852570	10	100165096	165	C10orf33	FALSE
cg06319579	17	8067921	165	C17orf44	FALSE
cg08214029	17	31415591	165	CCL18	FALSE
cg10161121	1	170894643	165	FASLG	FALSE
cg24244000	15	25343930	165	GABRG3	FALSE
cg09147827	14	93859606	165	SERPINA6	FALSE
cg00596686	X	7147332	165	STS	FALSE
cg11719297	21	42060152	166	RIPK4	TRUE	21:42059152-42060619
cg24919884	1	3370148	166	ARHGEF16	FALSE
cg06710648	1	58488965	166	DAB1	FALSE
cg16405957	12	51332060	166	KRT2A	FALSE
cg23645091	12	51200676	166	KRT5	FALSE
cg20789691	9	5330039	166	RLN1	FALSE
cg07705908	6	34631903	166	SPDEF	FALSE
cg08088989	22	21204447	166	SUHW1	FALSE
cg04757243	3	135131513	167	C3orf36	FALSE
cg19370451	1	150653185	167	CRNN	FALSE
cg19815589	11	70386710	167	LOC220070	FALSE
cg26504906	6	27323654	167	PRSS16	FALSE
cg04275881	1	158063058	167	SLAMF8	FALSE
cg25107903	8	7308769	167	SPAG11	FALSE
cg19857541	3	110319490	168	MORC1	TRUE	3:110319373-110319935
cg08256781	19	6086510	168	ACSBG2	FALSE
cg02888247	6	24827214	168	C6orf62	FALSE
cg05684195	3	9895572	168	CIDEC	FALSE
cg20541456	5	156629098	168	CYFIP2	FALSE
cg20585500	11	64459768	168	GPHA2	FALSE
cg12022621	1	202001128	168	LAX1	FALSE
cg15407570	3	52504564	168	STAB1	FALSE
cg14153740	7	141604179	168	TRY1	FALSE
cg14652095	6	26126164	169	HIST1H1A	TRUE	6:26125429-26126270
cg04338788	3	52453914	169	SEMA3G	TRUE	3:52453443-52454011
cg17461214	1	239865686	169	CHML	FALSE
cg05000446	9	35032395	169	MGC41945	FALSE
cg17496921	19	11267993	169	TSPAN16	FALSE
cg15543551	3	193927896	170	FGF12	TRUE	3:193927501-193928340
cg06384491	X	57180613	170	SPIN2	TRUE	X:57180226-57180702
cg19798224	14	99859262	170	C14orf68	FALSE
cg21518947	11	66979224	170	CABP4	FALSE
cg12428416	13	19615597	170	GJA3	FALSE
cg11532513	3	54937282	170	LRTM1	FALSE
cg25690265	16	19375443	170	TMC5	FALSE
cg07638935	10	102811417	171	KAZALD1	TRUE	10:102810283-102811953
cg14456683	3	148609700	171	ZIC1	TRUE	3:148609249-148612068
cg12334759	19	426154	171	C19orf19	FALSE
cg08300860	10	88418237	171	LDB3	FALSE
cg18787449	X	151670926	171	MAGEA2B	FALSE
cg03468463	18	59374544	171	SERPINB12	FALSE
cg11096993	11	67174534	172	ACY3	TRUE	11:67174436-67174737
cg25674286	1	111848438	172	ADORA3	FALSE
cg05744229	14	22974518	172	MYH7	FALSE
cg06617418	X	109548769	172	RGAG1	FALSE
cg07441143	8	143821003	172	SLURP1	FALSE
cg03998348	15	36014577	172	TMCO5	FALSE
cg20695587	4	68678354	172	TMPRSS11F	FALSE
cg20576597	21	44956096	173	C21orf29	TRUE	21:44956096-44956362
cg07823492	17	43963098	173	HOXB1	TRUE	17:43962669-43963416
cg04481779	6	137407818	173	IL20RA	TRUE	6:137406829-137408018
cg03240509	12	4788430	173	KCNA6	TRUE	12:4788356-4789953
cg24711914	18	27210565	173	DSG4	FALSE
cg06906435	14	98247530	173	FLJ25773	FALSE
cg11784281	2	232166029	173	MGC35154	FALSE
cg14014613	17	3142799	173	OR3A1	FALSE
cg25288155	11	73035044	173	PLEKHB1	FALSE
cg09068492	11	14950234	174	CALCA	TRUE	11:14949913-14950639
cg27413508	20	29689178	174	COX4I2	TRUE	20:29689164-29689621
cg22059008	16	2788313	174	TESSP1	TRUE	16:2788298-2789206
cg07545925	11	117720137	174	CD3G	FALSE
cg00350478	6	168222862	174	FRMD1	FALSE
cg07478122	15	22781514	174	HBII-13	FALSE
cg20664201	12	56135537	174	INHBE	FALSE
cg26701826	4	109034053	174	MGC26963	FALSE
cg16131766	15	21361373	174	MKRN3	FALSE
cg06094150	16	55243138	174	MT1B	FALSE
cg08013810	20	33852653	174	PHF20	FALSE
cg07459489	8	118216344	174	SLC30A8	FALSE
cg12062492	14	23492980	175	DHRS4	TRUE	14:23492534-23493127
cg08996986	19	60275375	175	EPS8L1	FALSE
cg24541550	11	10671936	175	MRVI1	FALSE
cg13274254	2	188865811	176	GULP1	TRUE	2:188864480-188866161
cg25341726	16	28425832	176	IL27	FALSE
cg13181284	12	51131954	176	KRT6B	FALSE
cg15149938	22	48404396	176	LOC348645	FALSE
cg07621046	10	118419648	177	C10orf82	TRUE	10:118419465-118419880
cg04897683	5	134899361	177	NEUROG1	TRUE	5:134898284-134900130
cg03495868	1	78729493	177	PTGFR	TRUE	1:78729090-78730168
cg25903497	2	218865347	177	TMBIM1	TRUE	2:218865058-218865787
cg24926042	12	51086266	177	KRTHB2	FALSE
cg20725021	3	188492269	177	MASP1	FALSE
cg06263495	11	2248580	178	ASCL2	TRUE	11:2246594-2249861
cg02748539	5	577269	178	SLC9A3	TRUE	5:576269-577990
cg19985911	12	56495941	178	AVIL	FALSE
cg03140978	1	24600714	178	C1orf201	FALSE
cg20398120	2	219404934	178	PRKAG3	FALSE
cg26738010	18	570188	179	CETN1	TRUE	18:570046-571049
cg12572939	X	153767650	179	F8A1	TRUE	X:153767233-153768860
cg03609102	11	1201109	179	MUC5B	TRUE	11:1200863-1201126
cg17371081	11	20647533	179	NELL1	TRUE	11:20647014-20648558
cg24198840	2	233605805	179	NEU2	FALSE
cg05500074	19	54958148	179	TSKS	FALSE
cg24433189	16	1068690	180	SSTR5	TRUE	16:1068532-1070086
cg14365123	1	2928106	180	ARPM2	FALSE
cg18638581	2	74913110	180	HK2	FALSE
cg25946374	1	24342378	180	IL22RA1	FALSE
cg09261262	10	88404534	180	OPN4	FALSE
cg24636657	X	105167542	180	SERPINA7	FALSE
cg00013618	22	20710839	180		FALSE
cg01962969	21	36363974	181	CBR1	TRUE	21:36363944-36364738
cg23173910	2	73973782	181	ACTG2	FALSE
cg04640913	20	44313922	181	CDH22	FALSE
cg08088390	20	16170	181	DEFB125	FALSE
cg06941093	1	53972284	181	GLIS1	FALSE
cg23207527	6	17391092	181	RBM24	FALSE
cg07271264	11	17697553	182	MYOD1	TRUE	11:17696873-17700534
cg23580945	17	34439867	182	FLJ43826	FALSE
cg01942127	3	53504299	183	CACNA1D	TRUE	3:53502834-53505321
cg22325703	11	93773883	183	GPR83	TRUE	11:93773573-93774675
cg08634464	19	2852147	183	LOC126295	TRUE	19:2850141-2853207
cg22672790	5	161045365	183	GABRA6	FALSE
cg25203856	11	7016556	183	NALP14	FALSE
cg09299388	6	49863149	183	PGK2	FALSE
cg06563300	12	99274942	183	SLC17A8	FALSE
cg19404190	5	147672366	183	SPINK7	FALSE
cg07109287	9	125813894	184	LHX2	TRUE	9:125813052-125815466
cg20979799	6	117305253	184	RFXDC1	TRUE	6:117304321-117305306
cg17095279	17	61655808	184	APOH	FALSE
cg01474260	22	15453884	184	CESK1	FALSE
cg03557698	1	55044509	185	C1orf177	TRUE	1:55044094-55044620
cg19815720	3	185253344	185	HTR3C	FALSE
cg10203483	2	85499750	185	LOC284948	FALSE
cg13297249	2	242594336	186	FLJ38379	TRUE	2:242594067-242595375
cg13837202	X	55263702	186	PAGE5	TRUE	X:55263379-55263750
cg15396367	9	139092600	186	UAP1L1	TRUE	9:139090808-139093750
cg18356799	18	26996631	186	DSC1	FALSE
cg15538427	11	62213590	186	LOC221091	FALSE
cg09061733	11	57121417	186	SERPING1	FALSE
cg09874776	20	43764255	186	WFDC13	FALSE
cg06112415	2	27195662	187	CGREF1	TRUE	2:27195000-27195770
cg00278366	12	109424670	187	RAD9B	TRUE	12:109423611-109424819
cg19512848	14	93533582	187	C14orf48	FALSE
cg12775479	3	152659374	187	IGSF10	FALSE
cg17240454	6	34632256	187	SPDEF	FALSE
cg11688469	1	199657684	187	TNNI1	FALSE
cg23131777	1	120240448	188	ADAM30	TRUE	1:120240390-120240877
cg06762858	7	99809192	188	PILRA	FALSE
cg06917325	11	62539699	188	SLC22A8	FALSE
cg12447832	2	3362264	189	TTC15	TRUE	2:3362246-3363158
cg01274324	21	32869873	189	C21orf77	FALSE
cg03029616	21	30907905	189	KRTAP6-1	FALSE
cg21044104	3	42426880	189	LYZL4	FALSE
cg24642468	16	47965498	189	MGC33367	FALSE
cg05105069	X	102472010	189	TCEAL7	FALSE
cg24854010	12	1596294	189	WNT5B	FALSE
cg06295856	11	14950218	190	CALCA	TRUE	11:14949913-14950639
cg19378039	21	43462400	190	CRYAA	TRUE	21:43462260-43462547
cg11291200	X	30143411	190	MAGEB2	TRUE	X:30143315-30143806
cg19688503	X	110400597	190	CAPN6	FALSE
cg26660631	1	46788081	190	FLJ32011	FALSE
cg15538820	9	135074639	190	OBP2B	FALSE
cg20970875	19	8314337	191	ANKRD47	TRUE	19:8313528-8314520
cg00695416	21	36364346	191	CBR1	TRUE	21:36363944-36364738
cg09542111	21	30233962	191	GRIK1	TRUE	21:30233131-30234502
cg13888886	20	55338047	191	SPO11	TRUE	20:55337919-55338432
cg24202119	5	35974449	191	CAPSL	FALSE
cg27212977	8	6770817	191	DEFA6	FALSE
cg26538442	16	65552448	191	FLJ21736	FALSE
cg10994126	1	174699121	191	PAPPA2	FALSE
cg07404485	7	94791589	191	PON1	FALSE
cg10725344	7	135084179	192	UNQ1940	TRUE	7:135084133-135084344
cg14329157	2	228444379	192	WDR69	TRUE	2:228444287-228444815
cg00136477	1	22842926	192	C1QC	FALSE
cg18752880	5	34079266	192	C1QTNF3	FALSE
cg24875415	20	23617470	192	CST4	FALSE
cg21880903	4	39085060	192	KLB	FALSE
cg07598199	4	120276277	192	MYOZ2	FALSE
cg13297865	6	80714134	193	ELOVL4	TRUE	6:80713277-80714461
cg01307730	6	25834576	193	HIST1H2AA	TRUE	6:25834320-25834896
cg18223379	20	31083308	193	BPIL3	FALSE
cg27418851	10	54201659	193	MBL2	FALSE
cg14897096	11	66478649	193	PC	FALSE
cg11286122	11	117982616	193	PHLDB1	FALSE
cg13794642	X	47114733	193	ZNF157	FALSE
cg18397653	4	88790677	194	DMP1	FALSE
cg08981777	19	53189549	194	ELSPBP1	FALSE
cg10769011	17	23875280	194	FOXN1	FALSE
cg25336198	11	2139194	194	INS	FALSE
cg15792367	19	56223296	194	KLK11	FALSE
cg15075718	11	118722386	194	MFRP	FALSE
cg09542291	1	151117616	194	SMCP	FALSE
cg05564251	2	230798884	194	SP140	FALSE
cg00615377	22	34566595	195	RBM9	TRUE	22:34566535-34566761
cg12497564	3	140740985	195	RBP1	TRUE	3:140740275-140741996
cg04457794	1	204484277	195	CTSE	FALSE
cg25013053	17	30499144	195	UNC45B	FALSE
cg21621114	19	53017172	196	CRX	TRUE	19:53017050-53017264
cg01737532	4	191099164	196	FRG1	TRUE	4:191098165-191099605
cg04254916	12	51200314	196	KRT5	TRUE	12:51200186-51200389
cg19306866	21	30892868	196	KRTAP6-2	TRUE	21:30892865-30893091
cg00055233	9	5329677	196	RLN1	TRUE	9:5328869-5329825
cg24211388	6	31690816	196	AIF1	FALSE
cg09995854	2	113526715	196	IL1F8	FALSE
cg01192952	19	44886982	196	LGALS14	FALSE
cg04968426	15	38908003	196	PPP1R14D	FALSE
cg10370591	2	1396438	196	TPO	FALSE
cg20095587	6	41238696	196	TREM2	FALSE
cg07015079	1	144260798	197	ANKRD35	TRUE	1:144259943-144260817
cg24975222	3	45162721	197	CDCP1	TRUE	3:45161842-45163260
cg00911351	5	140747439	197	PCDHGB4	TRUE	5:140747256-140748040
cg16069910	19	17432528	197	TXNL6	TRUE	19:17432468-17432768
cg03160135	6	117693611	197	VGLL2	TRUE	6:117692316-117694016
cg15377518	2	144994583	197	ZFHX1B	TRUE	2:144994033-144994606
cg16150435	6	31188508	197	C6orf15	FALSE
cg05338167	15	66285305	197	CALML4	FALSE
cg13084335	11	111287880	197	CRYAB	FALSE
cg25214366	8	7275083	197	DEFB103A	FALSE
cg00431549	12	14930292	197	MGP	FALSE
cg12753858	15	32425161	197	NUT	FALSE
cg22193702	1	17404020	197	PADI1	FALSE
cg05245515	14	20537113	197	SLC39A2	FALSE
cg01703884	12	108362557	198	FLJ37587	TRUE	12:108362343-108362608
cg20542190	19	59542431	198	LILRA4	TRUE	19:59542421-59542761
cg00772000	6	18231028	198	NHLRC1	TRUE	6:18230039-18231226
cg11206634	2	128174869	198	SFT2D3	TRUE	2:128174687-128174933
cg15186584	9	34387651	198	C9orf24	FALSE
cg08351331	20	36408497	198	LBP	FALSE
cg21754343	1	150925421	198	LCE2B	FALSE
cg21985470	1	153538047	198	PKLR	FALSE
cg06501790	5	176743863	198	SLC34A1	FALSE
cg08201421	20	43889558	198	TNNC2	FALSE
cg19579782	10	17283886	199	DNMT2	TRUE	10:17283196-17283932
cg01377911	19	54259848	199	NTF5	TRUE	19:54259762-54260343
cg02077702	15	72252941	199	ISLR	FALSE
cg25473396	16	66819	199	MPG	FALSE
cg20029201	11	118287023	200	BCL9L	TRUE	11:118286300-118287082
cg23663653	14	105280252	200		TRUE	14:105280160-105280368
cg09816180	4	72868952	200	GC	FALSE
cg15233681	2	102137034	200	IL1R1	FALSE
cg18641937	1	159191013	200	ITLN2	FALSE
cg06353345	11	5279552	200	OR51B4	FALSE
cg19630689	14	94054134	200	SERPINA12	FALSE
cg23988567	14	105308587	200		FALSE
cg04453065	1	85819249	201	CYR61	TRUE	1:85818356-85819916
cg04272086	18	48121357	201	DCC	TRUE	18:48120150-48121583
cg22881914	14	51605897	201	NID2	TRUE	14:51604216-51606602
cg07084163	5	36102540	201	UGT3A2	TRUE	5:36102492-36102714
cg16779976	10	98021115	201	BLNK	FALSE
cg26361780	3	150028479	201	CPB1	FALSE
cg21142398	1	53972666	201	GLIS1	FALSE
cg10479672	2	113527112	201	IL1F8	FALSE
cg02110963	6	10542961	201	MGC40222	FALSE
cg04806409	21	42608574	201	TFF3	FALSE
cg01988129	8	67507490	202	ADHFE1	TRUE	8:67506956-67507717
cg09207718	15	72828439	202	CYP1A2	FALSE
cg21312148	1	150902698	202	LCE2D	FALSE
cg13500819	5	138753299	202	PACAP	FALSE
cg22815110	1	63561521	203	FOXD3	TRUE	1:63560296-63563122
cg11830061	9	5175415	203	INSL6	TRUE	9:5175191-5175954
cg27409364	11	17714319	203	KCNC1	TRUE	11:17712319-17714962
cg11132751	X	51166710	203	LOC340602	TRUE	X:51166104-51167780
cg06908778	10	22674608	203	SPAG6	TRUE	10:22673932-22675060
cg10061247	3	50371740	203	TMEM115	TRUE	3:50371317-50372369
cg11577097	15	56217974	203	AQP9	FALSE
cg22876908	12	54611416	203	DGKA	FALSE
cg02493771	21	30666199	203	KRTAP13-2	FALSE
cg01678321	5	150663723	203	SLC36A3	FALSE
cg27147004	12	129388771	204	PIWIL1	TRUE	12:129387599-129390158
cg09625066	X	46822515	204	RGN	TRUE	X:46822380-46823326
cg14837082	3	11269604	204	HRH1	FALSE
cg18967533	19	56164537	204	KLK6	FALSE
cg14912034	10	30958857	204	LYZL2	FALSE
cg12164282	2	1727119	205	PXDN	TRUE	2:1725493-1728007
cg22980351	X	125514720	205	WDR40B	TRUE	X:125513074-125514769
cg23566335	8	39561504	205	ADAM18	FALSE
cg26063872	20	29491867	205	DEFB123	FALSE
cg13084525	11	34599039	205	EHF	FALSE
cg04184278	12	21649026	205	GYS2	FALSE
cg24423088	21	31107236	205	KRTAP8-1	FALSE
cg23183296	4	70181011	205	UGT2B28	FALSE
cg12925542	3	168853778	205	WDR49	FALSE
cg07665060	19	43486438	206	C19orf33	TRUE	19:43486241-43486509
cg16791686	19	52940826	206	GLTSCR2	TRUE	19:52940242-52941584
cg04557383	16	55261069	206	MT1H	TRUE	16:55260846-55261294
cg03686067	18	64655369	206	C18orf14	FALSE
cg18174542	22	40286807	206	CSDC2	FALSE
cg04584523	1	22175799	206	ELA3B	FALSE
cg10099900	20	1041733	206	PSMF1	FALSE
cg16483916	19	5518758	207	PLAC2	TRUE	19:5518360-5519260
cg20832009	X	67784443	207	STARD8	TRUE	X:67784063-67784532
cg17961200	9	134927393	207	CEL	FALSE
cg20444256	19	50518181	207	CKM	FALSE
cg08430598	20	23679367	207	CST1	FALSE
cg16240480	1	234624096	207	EDARADD	FALSE
cg18020749	17	41728481	207	LRRC37A	FALSE
cg05016508	11	63628146	208	FLRT1	TRUE	11:63628069-63628301
cg20300246	9	138236568	208	LHX3	TRUE	9:138236352-138237116
cg22325823	17	70178657	208	RAB37	TRUE	17:70178644-70179471
cg16648841	1	57093273	208	C8A	FALSE
cg16351002	10	124600091	208	CUZD1	FALSE
cg07944811	7	44195355	208	GCK	FALSE
cg12242338	3	141879779	208	TRIM42	FALSE
cg04588079	12	13044279	209	HEBP1	TRUE	12:13044082-13046575
cg05800321	8	143864801	209	LY6D	TRUE	8:143864661-143864861
cg19553721	17	18370676	209	FAM106A	FALSE
cg16242770	17	36725264	209	KRTAP17-1	FALSE
cg12639234	8	18293244	209	NAT2	FALSE
cg09111917	3	44890922	209	TGM4	FALSE
cg04891836	19	6621390	209	TNFSF14	FALSE
cg13928306	16	3102398	209	ZNF205	FALSE
cg17296166	19	51666407	210	FLJ10781	TRUE	19:51666325-51667046
cg02490034	7	129913072	210	MEST	TRUE	7:129912883-129914215
cg03969797	15	21361757	210	MKRN3	TRUE	15:21361624-21362006
cg10051054	1	3659032	210	CCDC27	FALSE
cg10189763	4	71372315	210	MUC7	FALSE
cg02019333	3	120374905	210	UPK1B	FALSE
cg02920216	21	18538810	211	CHODL	TRUE	21:18538786-18539779
cg18062196	17	54997457	211	DHX40	TRUE	17:54997326-54998275
cg14137939	11	85074757	211	FLJ38159	TRUE	11:85074568-85074772
cg05824215	6	167456036	211	CCR6	FALSE
cg23581186	21	31041180	211	KRTAP21-2	FALSE
cg17701886	3	184453527	212	B3GNT5	TRUE	3:184453437-184455435
cg17204557	2	120940379	212	FLJ14816	TRUE	2:120939973-120940445
cg20937139	4	158112208	212	PDGFC	TRUE	4:158111741-158112821
cg16184943	22	21193293	212	SUHW2	TRUE	22:21192576-21193367
cg22068211	3	129777831	212	C3orf27	FALSE
cg26534002	X	151633482	212	CSAG3A	FALSE
cg26928972	3	123526489	212	CSTA	FALSE
cg10997248	11	117204229	212	FXYD2	FALSE
cg19196684	1	53380625	212	SLC1A7	FALSE
cg14179628	X	102471609	212	TCEAL7	FALSE
cg22524514	11	65536252	214	CST6	TRUE	11:65535710-65536535
cg23428445	7	124192703	214	GPR37	TRUE	7:124192612-124193608
cg19587887	8	87151181	214	PSKH2	TRUE	8:87150641-87151288
cg01091565	15	88095766	214	MESP1	FALSE
cg06100324	16	751348	214	MSLN	FALSE
cg04369341	20	41978436	215	C20orf100	TRUE	20:41976342-41978686
cg01593886	17	45633777	215	COL1A1	TRUE	17:45632846-45634134
cg01346718	22	37043820	215	CSNK1E	TRUE	22:37042456-37043961
cg17671157	14	87862789	215	KCNK10	TRUE	14:87862468-87863186
cg17586860	20	22963906	215	SSTR4	TRUE	20:22963641-22965145
cg21207418	19	11549711	215	ACP5	FALSE
cg02194211	3	58627386	215	FAM3D	FALSE
cg14598387	9	124329178	215	OR1N1	FALSE
cg13348944	11	117552331	215	SCN2B	FALSE
cg02157083	11	116168010	216	APOA5	FALSE
cg00546897	21	44056660	216	LOC284837	FALSE
cg20769842	15	21361331	216	MKRN3	FALSE
cg03422350	6	40003649	216	MOCS1	FALSE
cg23307338	11	60017043	216	MS4A12	FALSE
cg20055101	16	3082646	216	ZNF206	FALSE
cg14607011	10	135021736	217	C10orf125	TRUE	10:135020610-135021994
cg06613840	3	49370578	217	GPX1	TRUE	3:49369777-49371045
cg06834875	14	99181016	217	KIAA1822	TRUE	14:99180849-99181899
cg23922708	18	76106171	217	PARD6G	TRUE	18:76104934-76107137
cg26963271	1	66031669	217	PDE4B	TRUE	1:66030397-66031906
cg18414381	11	34599461	217	EHF	FALSE
cg23408620	4	187424489	217	F11	FALSE
cg09305224	9	139047066	217	FUT7	FALSE
cg22139563	17	36851339	217	KRTHA8	FALSE
cg26545162	17	71586687	217	LGICZ1	FALSE
cg22461018	4	174774586	217	MORF4	FALSE
cg17725968	4	96980049	217	PDHA2	FALSE
cg24027679	1	9009208	217	SLC2A7	FALSE
cg02288165	20	3635992	217	SN	FALSE
cg18971671	19	54093533	217	TULP2	FALSE
cg13504059	17	35975468	218	CCR7	FALSE
cg06224510	10	7785460	218	ITIH2	FALSE
cg13156411	3	46894458	218	PTHR1	FALSE
cg23817637	10	129581419	218	TMEM12	FALSE
cg02921257	3	39208862	219	CMYA1	FALSE
cg09917461	X	151654103	219	CSAG1	FALSE
cg06391660	2	74461691	219	DCTN1	FALSE
cg25545210	17	36791943	219	KRTHA4	FALSE
cg14696820	1	151066792	219	LCE1A	FALSE
cg15228639	15	40077231	219	PLA2G4E	FALSE
cg08137716	17	44226904	219	TTLL6	FALSE
cg12240237	7	73584338	219	WBSCR23	FALSE
cg24824840	19	55911787	220	SHANK1	TRUE	19:55911787-55912150
cg04574507	1	156567662	220	CD1B	FALSE
cg13118849	19	19188542	220	CSPG3	FALSE
cg24999727	4	88462842	220	HSD17B13	FALSE
cg03366382	11	2139220	220	INS	FALSE
cg08611714	17	36877384	220	KRTHA2	FALSE
cg16826286	17	31290403	220	LYZL6	FALSE
cg07408456	19	15451532	220	PGLYRP2	FALSE
cg00079563	22	41583465	221	ARFGAP3	TRUE	22:41582136-41584116
cg04759439	3	56477652	221	CAST1	TRUE	3:56476661-56477979
cg03626672	2	237143403	221	CMKOR1	TRUE	2:237143297-237143512
cg19319069	7	129380246	221	UBE2H	TRUE	7:129379099-129380306
cg18239253	20	186156	221	DEFB32	FALSE
cg27583102	19	56147867	221	KLK5	FALSE
cg10414946	11	59612934	221	MS4A2	FALSE
cg19836808	1	151699540	221	S100A7	FALSE
cg22123464	19	52666713	221	SLC8A2	FALSE
cg18722841	11	71632630	222	PHOX2A	TRUE	11:71632226-71633530
cg16296356	17	30471223	222	RAD51L3	TRUE	17:30470478-30471399
cg07363637	6	31954975	222	SLC44A4	TRUE	6:31954897-31955162
cg15457079	10	101831806	222	CPN1	FALSE
cg06638451	3	58538309	222	FAM107A	FALSE
cg11237817	19	59927574	222	KIR3DL3	FALSE
cg05556020	1	202401866	222	REN	FALSE
cg02595219	11	73856409	223	KCNE3	TRUE	11:73855641-73856427
cg03270204	6	30959617	223	DDR1	FALSE
cg25256723	1	167822568	223	F5	FALSE
cg20848130	1	226404399	223	GJA12	FALSE
cg11898695	6	42991482	223	PTCRA	FALSE
cg14721213	1	169421236	224	FMO2	FALSE
cg03087937	11	26550132	224	MUC15	FALSE
cg15787039	15	30721477	225	SGNE1	TRUE	15:30721114-30721502
cg16873863	11	2877752	225	SLC22A18	FALSE
cg13156121	16	56567615	225	TEPP	FALSE
cg20812929	14	23528185	226	DHRS4L2	TRUE	14:23528033-23528272
cg02332525	3	6878153	226	GRM7	TRUE	3:6877272-6878818
cg18081258	14	20564001	226	NDRG2	TRUE	14:20562491-20564111
cg27195224	22	31183147	226	BPIL2	FALSE
cg02351381	12	108656729	226	C12orf34	FALSE
cg19392109	15	37329985	226	FLJ39531	FALSE
cg17740645	17	35147939	226	GRB7	FALSE
cg11385473	11	31487519	226	IMMP1L	FALSE
cg16272420	10	118371034	226	PNLIPRP2	FALSE
cg02937102	6	108199922	226	SCML4	FALSE
cg11656547	9	71848567	227	MAMDC2	TRUE	9:71848534-71849733
cg19585882	X	47999968	227	SSX1	TRUE	X:47999947-48000238
cg13628514	12	108755822	227	TRPV4	TRUE	12:108755244-108756087
cg22012981	3	58497729	227	ACOX2	FALSE
cg13406950	1	89303252	227	GBP1	FALSE
cg14519134	3	130744520	227	H1FOO	FALSE
cg13594711	7	75876721	227	SRCRB4D	FALSE
cg04743650	1	100957658	227	VCAM1	FALSE
cg11884243	9	136912707	228	FCN2	TRUE	9:136912687-136912888
cg27634151	11	93774294	228	GPR83	TRUE	11:93773573-93774675
cg15433631	5	2804541	228	IRX2	TRUE	5:2801201-2806084
cg22642718	17	21259430	228	KCNJ12	TRUE	17:21259142-21260782
cg02128567	6	39304976	228	KCNK5	TRUE	6:39304772-39305609
cg16790239	16	88512755	228	MC1R	TRUE	16:88512584-88512791
cg26057752	7	44071460	228	PGAM2	TRUE	7:44071216-44071552
cg27190239	12	9976441	228	CLEC2A	FALSE
cg06952310	19	19188990	228	CSPG3	FALSE
cg26894575	1	151784678	228	S100A4	FALSE
cg27635271	15	73728631	228	SH3PX3	FALSE
cg08029608	X	12794895	228	TLR7	FALSE
cg16991589	13	24568047	229	PABPC3	TRUE	13:24567943-24568646
cg04875162	X	90576482	229	PABPC5	TRUE	X:90576124-90576920
cg17421623	3	120670260	229	C3orf9	FALSE
cg14893129	17	75766646	230	CARD14	TRUE	17:75766640-75766949
cg11323198	16	60627307	230	CDH8	TRUE	16:60625845-60628489
cg01668383	13	36577573	230	CSNK1A1L	TRUE	13:36577453-36577918
cg08532057	13	24773436	230	NUPL1	TRUE	13:24772849-24774392
cg23629496	20	5982446	230	C20orf75	FALSE
[truncated: 3,332 more rows]

## Sheet: Combined
CG ID	Chr	MapInfo	Distance_to_TSS	Symbol	CPG_ISLAND	CPG_ISLAND_LOCATIONS
cg18429742	5	904101	0	ZDHHC11	TRUE	5:903892-904165
cg09643544	19	9334696	0	ZNF177	TRUE	19:9334490-9335153
cg20437604	1	149221178	0	ANXA9	FALSE
cg19466563	4	88669530	0	SPARCL1	FALSE
cg10455133	X	47305452	1	ARAF	TRUE	X:47305171-47306159
cg06193397	8	120720250	1	ENPP2	FALSE
cg23219570	12	4359154	1	FGF23	FALSE
cg09555879	19	47261796	1	GRIK5	FALSE
cg12008118	10	88418409	1	LDB3	FALSE
cg23765993	20	43609443	1	SPINLW1	FALSE
cg21561173	21	14274634	2	C21orf81	TRUE	21:14273649-14275990
cg26185508	1	54392033	2	CDCP2	TRUE	1:54391846-54392065
cg07545232	X	151688898	2	MAGEA3	TRUE	X:151688663-151689075
cg26055770	3	73756760	2	PDZRN3	TRUE	3:73755774-73757236
cg14717170	3	166397165	2	SLITRK3	TRUE	3:166396716-166397896
cg25021182	1	15675181	2	ELA2B	FALSE
cg20732137	20	61721671	2	GMEB2	FALSE
cg11505080	X	53095229	2	GPR173	FALSE
cg24585690	5	135259413	2	IL9	FALSE
cg21065959	1	151025379	2	LCE1E	FALSE
cg18053607	22	29848963	2	PIB5PA	FALSE
cg15503752	17	72151326	2	ST6GALNAC1	FALSE
cg08539991	19	40895672	2	ZBTB32	FALSE
cg05078019	4	609392	3	PDE6B	TRUE	4:609359-609999
cg21825364	Y	14677489	3	VCY	TRUE	Y:14677314-14677669
cg03908676	11	10546858	3	XLKD1	FALSE
cg17301902	9	79453039	4	GNA14	TRUE	9:79451891-79453694
cg19105504	11	60281048	4	MGC35295	TRUE	11:60280945-60281190
cg15799267	17	7883131	4	ALOX15B	FALSE
cg14700707	6	32299818	4	NOTCH4	FALSE
cg14659547	3	109958816	4	RETNLB	FALSE
cg03962522	22	30769254	5	SLC5A1	TRUE	22:30769023-30769564
cg22407458	6	35217099	5	TCP11	TRUE	6:35216605-35217470
cg00750606	1	20771708	5	CDA	FALSE
cg03770548	14	22594880	5	CDH24	FALSE
cg13853198	1	159451716	5	FCER1G	FALSE
cg04030848	22	29290881	5	GAL3ST1	FALSE
cg07572435	8	143865015	5	LY6D	FALSE
cg12339029	2	210888147	5	MYL1	FALSE
cg12061127	20	43693326	5	WFDC9	FALSE
cg27443050	14	54728155	6	DLG7	TRUE	14:54727608-54728433
cg21902327	12	4425047	6	FGF6	TRUE	12:4425015-4425387
cg26320696	11	12355685	6	PARVA	TRUE	11:12355424-12356620
cg12537796	X	106402474	6		TRUE	X:106402236-106403147
cg12616487	11	62135639	6	EML3	FALSE
cg03167883	8	49665520	6	FLJ46365	FALSE
cg21856603	17	3660572	6	ITGAE	FALSE
cg16773028	1	110949862	6	KCNA2	FALSE
cg11880010	9	78518464	6	KIAA0367	FALSE
cg03960217	1	150914401	6	LCE2C	FALSE
cg08573687	11	2149617	6	TH	FALSE
cg10432859	2	234255329	6	UGT1A7	FALSE
cg24891133	13	30378335	7	FLJ14834	TRUE	13:30378164-30379189
cg17410236	14	85066248	7	FLRT2	TRUE	14:85065422-85066845
cg04305913	9	138348733	7	GPSM1	TRUE	9:138348614-138348948
cg16178491	12	100128127	7	SLC5A8	TRUE	12:100127137-100128325
cg24443136	X	152454781	7	ATP2B3	FALSE
cg07950803	1	156490558	7	CD1A	FALSE
cg26366091	1	111571797	7	CHI3L2	FALSE
cg10134939	2	75650363	7	FLJ13391	FALSE
cg00684178	2	242400753	7	NEU4	FALSE
cg23989635	16	67328704	8	CDH1	TRUE	16:67328348-67330000
cg02992632	3	193928074	8	FGF12	TRUE	3:193927501-193928340
cg04471507	1	26105963	8	STMN1	TRUE	1:26104408-26106291
cg00095526	1	199348309	8	CACNA1S	FALSE
cg22282672	5	121493122	8	FLJ32921	FALSE
cg02022375	17	36451247	8	KRTAP1-1	FALSE
cg12215675	6	167658584	8	TTLL2	FALSE
cg00393585	4	166097541	9	FLJ31659	TRUE	4:166097363-166098038
cg25596297	2	222871119	9	FLJ32447	TRUE	2:222871073-222872248
cg10189695	4	8633200	9	GPR78	TRUE	4:8632931-8634384
cg12728629	X	151673029	9	MAGEA2	TRUE	X:151672876-151673193
cg25829729	13	35686667	9	TEB1	TRUE	13:35686240-35687144
cg00745543	12	47009021	9	H1T2	FALSE
cg24427660	11	808892	10	PNPLA2	TRUE	11:808884-809164
cg16232126	2	107969437	10	SLC5A7	TRUE	2:107969161-107970056
cg24641737	1	111544794	10	DENND2D	FALSE
cg13842648	5	135259425	10	IL9	FALSE
cg04311964	8	143830944	10	LYPD2	FALSE
cg18493182	8	143830964	10	LYPD2	FALSE
cg27398547	14	60022491	11	C14orf39	TRUE	14:60021580-60022823
cg03819692	16	87753140	11	FLJ36701	TRUE	16:87752957-87753393
cg21402035	22	36549346	11	GALR3	FALSE
cg03803009	17	69875229	11	GPR142	FALSE
cg25214346	1	159474590	11	NR1I3	FALSE
cg09563216	1	148521865	12	C1orf51	TRUE	1:148520405-148522224
cg05073035	3	148609883	12	ZIC1	TRUE	3:148609249-148612068
cg24870391	17	29636788	12	CCL11	FALSE
cg27443224	9	34700135	12	CCL21	FALSE
cg08612037	12	106236340	13	BTBD11	TRUE	12:106235619-106239476
cg00551244	8	125252957	13	C8orf78	TRUE	8:125252840-125253126
cg06872381	12	7755343	13	DPPA3	TRUE	12:7755307-7755517
cg02998425	14	69993957	13	ADAM21	FALSE
cg24607535	20	57966890	13	CDH26	FALSE
cg14076161	12	11354646	13	PRB4	FALSE
cg19787037	8	7308589	13	SPAG11	FALSE
cg12973651	19	47586293	14	CNFN	TRUE	19:47586067-47586328
cg00983899	11	67047429	14	CABP2	FALSE
cg11983245	17	36928680	14	KRT15	FALSE
cg08343834	17	15109383	14	PMP22	FALSE
cg25221254	19	6284547	15	ASAH3	TRUE	19:6284351-6284668
cg08887581	1	16203303	15	C1orf64	FALSE
cg09096031	2	198248814	15	C2orf11	FALSE
cg24030609	1	15675198	15	ELA2B	FALSE
cg10694914	11	110755641	15	POU2AF1	FALSE
cg01772980	11	61714271	15	SCGB1D1	FALSE
cg19478478	6	123999626	15	TRDN	FALSE
cg04329454	6	33669077	16	FLJ43752	TRUE	6:33668263-33669321
cg13424446	20	23917432	16	GGTLA4	TRUE	20:23916273-23917531
cg17738194	4	80548412	16	GK2	TRUE	4:80548404-80548638
cg05152459	X	74921812	16	MAGEE2	TRUE	X:74921219-74922001
cg20322862	18	3402088	16	TGIF	TRUE	18:3401960-3402369
cg18669381	1	16411675	16	ARHGEF19	FALSE
cg01248426	8	87180271	16	ATP6V0D2	FALSE
cg15903395	2	88605268	16	FLJ25369	FALSE
cg15820955	12	46479206	16	HDAC7A	FALSE
cg18292394	10	82039430	16	MAT1A	FALSE
cg16466334	11	102219568	16	MMP3	FALSE
cg15417244	12	40117825	16	PDZRN4	FALSE
cg24024214	5	180258748	17	BTNL8	TRUE	5:180258708-180258931
cg27493997	1	154942016	17	CRABP2	TRUE	1:154941303-154943404
cg20356482	9	96395913	17	FBP2	TRUE	9:96395689-96395929
cg14959707	16	11783892	17	ZC3H7A	TRUE	16:11783829-11784227
cg27497781	1	111634990	17	CHIA	FALSE
cg19714296	1	47179987	17	CYP4A11	FALSE
cg19910382	2	88208676	17	FABP1	FALSE
cg05404787	2	10198977	17	FLJ25102	FALSE
cg06547766	3	189413398	17	LPP	FALSE
cg14662756	12	52187672	17	NPFF	FALSE
cg15408454	X	151617883	18	MAGEA6	TRUE	X:151617742-151618072
cg22035229	1	76035236	18	MSH4	TRUE	1:76034981-76035517
cg08314660	11	384199	18	PKP3	TRUE	11:384143-384690
cg26521448	16	11783927	18	ZC3H7A	TRUE	16:11783829-11784227
cg14189571	4	189153937	18	ZFP42	TRUE	4:189153056-189154305
cg19756068	19	46189062	18	CYP2B6	FALSE
cg24743310	17	19560497	18	FLJ31196	FALSE
cg20034100	6	125346195	18	IBRDC1	FALSE
cg06650260	1	27113065	18	NR0B2	FALSE
cg19882093	20	23917397	19	GGTLA4	TRUE	20:23916273-23917531
cg07785936	2	132891105	19	GPR39	TRUE	2:132889810-132891152
cg20993403	20	34163743	19	EPB41L1	FALSE
cg09022808	22	29290857	19	GAL3ST1	FALSE
cg11812202	10	118295399	19	PNLIP	FALSE
cg22709192	12	52653176	20	HOXC11	TRUE	12:52652893-52656105
cg16772207	20	62266251	20	MYT1	TRUE	20:62266213-62266511
cg12435792	4	609375	20	PDE6B	TRUE	4:609359-609999
cg08670691	1	3658802	20	CCDC27	FALSE
cg26099316	3	52803834	20	ITIH3	FALSE
cg06825166	10	98109069	20	TMEM10	FALSE
cg24323726	3	112796876	20	ZBED2	FALSE
cg06985415	10	133805401	21	C10orf39	TRUE	10:133805370-133805647
cg17928268	20	23381503	21	CST11	FALSE
cg25081201	10	43187077	21	FXYD4	FALSE
cg03580247	17	39701014	21	SLC4A1	FALSE
cg18680834	19	35555189	21	ZNF536	FALSE
cg20543571	15	43036170	22	C15orf43	TRUE	15:43036097-43036298
cg18530748	16	28542345	22	SULT1A1	TRUE	16:28541800-28542952
cg06493386	8	73150351	22	TRPA1	TRUE	8:73149852-73150676
cg18374517	2	232979819	22	ALPPL2	FALSE
cg08489623	7	55869714	22	FLJ44060	FALSE
cg12391921	X	70438375	22	ITGB1BP2	FALSE
cg06238491	19	59568258	22	LAIR1	FALSE
cg07426848	1	151788336	22	S100A3	FALSE
cg11469778	2	131390671	23	ARHGEF4	TRUE	2:131390078-131390751
cg24058132	14	87529619	23	GALC	TRUE	14:87528346-87529624
cg12387247	19	7672974	23	FCER2	FALSE
cg00587613	11	66976799	23	GPR152	FALSE
cg02105856	1	205186407	23	PIGR	FALSE
cg05647859	12	79855849	24	LIN7A	TRUE	12:79854346-79856034
cg19780563	10	94584474	24	EXOC6	FALSE
cg26251865	19	48912054	24	IRGC	FALSE
cg00280894	X	101365619	24	NXF2	FALSE
cg18333690	1	17507303	24	PADI4	FALSE
cg15329483	X	52700699	24	SSX7	FALSE
cg12707353	4	8491529	25	FLJ35725	TRUE	4:8491447-8491703
cg20931907	X	51166482	25	LOC340602	TRUE	X:51166104-51167780
cg04391540	19	52739941	25	ZNF541	TRUE	19:52739817-52741134
cg22241124	2	98352807	25	CNGA3	FALSE
cg16440909	X	149364403	25	CXorf6	FALSE
cg22575540	2	27359129	25	TRIM54	FALSE
cg16280667	11	118259803	26	BLR1	TRUE	11:118259679-118259945
cg05333568	1	221633417	26	C1orf65	TRUE	1:221633187-221633859
cg24130010	21	18539047	26	CHODL	TRUE	21:18538786-18539779
cg21553596	21	41610505	26	FAM3B	TRUE	21:41610281-41611298
cg16848873	17	44037307	26	HOXB6	TRUE	17:44037214-44037432
cg09748960	6	32482904	26	BTNL2	FALSE
cg10375110	4	40032200	26	CHRNA9	FALSE
cg22268164	8	110168926	26	TRHR	FALSE
cg07233761	5	54317194	27	ESM1	TRUE	5:54316863-54317280
cg00491404	1	110108114	27	EPS8L3	FALSE
cg23813257	16	3055287	27	IL32	FALSE
cg21578906	22	30981345	27	SLC5A4	FALSE
cg11750883	1	150753574	28	C1orf42	FALSE
cg05256043	13	93929952	28	DCT	FALSE
cg02657438	14	80934652	28	STON2	FALSE
cg13274713	17	56832068	29	TBX2	TRUE	17:56827708-56833527
cg17032587	X	150653903	29	CNGA2	FALSE
cg05023691	1	190871876	29	RGS13	FALSE
cg14228238	3	170346817	30	EVI1	TRUE	3:170346659-170347262
cg24496423	X	152699674	30	STK23	TRUE	X:152699478-152699970
cg12417466	3	35658823	30	ARPP-21	FALSE
cg19560210	1	228579960	30	PGBD5	FALSE
cg10857345	X	107112286	30	TEX13B	FALSE
cg17901463	1	110031996	31	GSTM1	TRUE	1:110031594-110032306
cg15158783	4	75066510	31	PF4	TRUE	4:75066388-75066770
cg02875297	9	5294611	31	RLN2	TRUE	9:5293703-5294659
cg08411049	18	59295230	31	SERPINB5	TRUE	18:59294878-59295284
cg22959932	3	8668706	31	C3orf32	FALSE
cg24110063	16	31347253	31	COX6A2	FALSE
cg02989940	16	31446735	31	ERAF	FALSE
cg24506604	12	50865769	31	LOC144501	FALSE
cg19873701	19	48465489	31	PSG9	FALSE
cg09426307	22	29198048	31	SEC14L3	FALSE
cg20851097	14	64359588	31	SPTB	FALSE
cg19139729	19	53081374	31	SULT2A1	FALSE
cg02810134	20	43889329	31	TNNC2	FALSE
cg25087423	11	118259745	32	BLR1	TRUE	11:118259679-118259945
cg14784653	10	13585014	32	C10orf30	FALSE
cg26298099	14	75907511	32	ESRRB	FALSE
cg13897627	16	47935998	32	FLJ44674	FALSE
cg13003163	12	47152748	33	ANP32D	TRUE	12:47152601-47152805
cg22930187	1	44171546	33	ARTN	TRUE	1:44171543-44171935
cg22983529	7	93389068	33	GNG11	TRUE	7:93388850-93389536
cg12343082	16	86527646	33	CA5A	FALSE
cg09432154	3	152517359	33	GPR87	FALSE
cg14477619	7	44547406	33	NPC1L1	FALSE
cg25450806	1	13903970	33	PRDM2	FALSE
cg17778120	3	140678009	33	RBP2	FALSE
cg17606785	14	22904648	34	EFS	TRUE	14:22904000-22905142
cg26609631	13	27264814	34	GSH1	TRUE	13:27263400-27265360
cg05615150	3	35658819	34	ARPP-21	FALSE
cg19216731	11	19180211	34	CSRP3	FALSE
cg03459809	1	224079633	34	EPHX1	FALSE
cg10127415	X	26120444	34	MAGEB6	FALSE
cg16986846	11	61732750	34	SCGB2A1	FALSE
cg16715722	10	102880286	34	TLX1	FALSE
cg08424423	6	31196167	35	CDSN	FALSE
cg08684473	19	59452902	35	LILRB5	FALSE
cg04037228	3	45611390	35	LIMD1	FALSE
cg26125600	4	74937842	35	PF4V1	FALSE
cg16558203	3	38322396	35	SLC22A14	FALSE
cg01029592	17	7434177	35	SOX15	FALSE
cg25053900	X	24943811	36	ARX	TRUE	X:24943461-24944792
cg25979644	18	53550001	36	ATP8B1	FALSE
cg19546781	16	55996216	36	CCL17	FALSE
cg22190114	19	61151046	36	NALP8	FALSE
cg10321723	1	144439119	36	PDZK1	FALSE
cg09699159	11	45072104	36	PRDM11	FALSE
cg25762706	8	27171784	36	STMN4	FALSE
cg00311768	8	144770000	36	TSTA3	FALSE
cg25942450	5	170668856	37	TLX3	TRUE	5:170667594-170672661
cg20359349	17	39350057	37	APR-2	FALSE
cg08373610	2	198248866	37	C2orf11	FALSE
cg13349425	5	134810974	37	C5orf20	FALSE
cg10490064	22	23947422	37	CRYBB2	FALSE
cg16019620	6	46869049	37	MEP1A	FALSE
cg05322019	10	102722313	37	SEMA4G	FALSE
cg20832020	3	115495602	37	VSIG9	FALSE
cg06908474	11	34417092	38	CAT	TRUE	11:34416588-34417548
cg04180460	3	41215966	38	CTNNB1	TRUE	3:41215077-41216769
cg24199834	4	147779576	38	POU4F2	TRUE	4:147778503-147781596
cg12439899	6	10523218	38	TFAP2A	TRUE	6:10519201-10524183
cg06007645	1	54880009	38	C1orf175	FALSE
cg25412453	1	153272843	38	DCST2	FALSE
cg19982860	9	21156581	38	IFNA21	FALSE
cg10248727	9	137553145	38	LCN1	FALSE
cg09163021	11	47427344	38	RAPSN	FALSE
cg16051685	1	26266670	38	TRIM63	FALSE
cg09440340	1	116455938	39	C1orf161	FALSE
cg23081213	2	219404716	40	PRKAG3	TRUE	2:219404498-219404730
cg16194715	13	36351926	40	SMAD9	TRUE	13:36351769-36352075
cg04527918	2	27384674	40	UCN	TRUE	2:27382533-27385080
cg27223827	2	105421352	40	FHL2	FALSE
cg00019495	4	57242282	40	HOP	FALSE
cg23143093	3	27308028	40	NEK10	FALSE
cg25211252	3	180467491	41	KCNMB3	TRUE	3:180467337-180467703
cg17894008	17	57023386	41	NACAL	TRUE	17:57023173-57023543
cg24926780	19	15699895	41	OR10H2	TRUE	19:15699863-15700302
cg23037403	5	178300789	41	ZNF454	TRUE	5:178300061-178301434
cg06123346	19	40746359	41	ATP4A	FALSE
cg00412772	19	43486685	41	C19orf33	FALSE
cg23760945	19	11526140	41	ELOF1	FALSE
cg10409560	4	76700323	41	FLJ23657	FALSE
cg10494770	22	22252454	41	IGLL1	FALSE
cg00412805	3	42701974	41	KBTBD5	FALSE
cg22077553	1	169888355	41	MYOC	FALSE
cg24331162	11	1812241	41	SYT8	FALSE
cg17667972	12	51494560	42	KRT4	FALSE
cg16418329	4	71235340	42	NYD-SP26	FALSE
cg25358289	5	139992912	43	CD14	TRUE	5:139991494-139993011
cg24083641	4	99283371	43	MGC46496	TRUE	4:99283262-99283992
cg17703554	8	88955455	43	WDR21C	TRUE	8:88954770-88955987
cg19954000	5	142045855	43	FGF1	FALSE
cg15606663	21	30734474	43	KRTAP15-1	FALSE
cg22152667	7	97457308	44	OCM	TRUE	7:97457217-97457435
cg26644395	10	5397020	44	UCN3	TRUE	10:5396811-5397265
cg13765961	11	59979814	44	MS4A1	FALSE
cg09736922	3	185578670	44	THPO	FALSE
cg02441647	3	100840189	45	COL8A1	TRUE	3:100840163-100840365
cg19848683	3	170346742	45	EVI1	TRUE	3:170346659-170347262
cg10315334	17	31231445	45	CCL5	FALSE
cg03097995	19	60360903	45	TNNI3	FALSE
cg16270990	11	130048107	46	C11orf44	FALSE
cg15976539	18	22699316	46	C18orf16	FALSE
cg05700681	16	55950265	46	CCL22	FALSE
cg25665697	15	64644935	46	LCTL	FALSE
cg15329866	3	172938520	46	PLD1	FALSE
cg21122774	9	135594817	46	SARDH	FALSE
cg19504245	19	60352432	46	TNNT1	FALSE
cg18043195	9	19023231	47	C9orf138	TRUE	9:19022988-19023266
cg05187322	17	75766923	47	CARD14	TRUE	17:75766640-75766949
cg09585781	17	59304868	47	CSH2	FALSE
cg27513764	17	57811693	47	EFCAB3	FALSE
cg00298357	5	148738984	47	IL17B	FALSE
cg13391235	16	83874112	47	MGC22001	FALSE
cg16954341	6	25760360	48	SCGN	TRUE	6:25760176-25760849
cg00613255	11	2138952	48	INS	FALSE
cg12237269	11	107087944	48	SLN	FALSE
cg02919422	8	55533097	49	SOX17	TRUE	8:55532627-55535230
cg04063348	6	52217306	49	IL17F	FALSE
cg18766755	1	151296563	49	SPRR2A	FALSE
cg00899659	10	44815977	49	ZNF22	FALSE
cg03886110	17	59817773	50	PECAM1	TRUE	17:59817605-59817882
cg03860768	8	11388980	50	BLK	FALSE
cg03941108	1	22858524	50	C1QB	FALSE
cg21168884	6	169940896	50	C6orf122	FALSE
cg03699566	11	71578300	50	FOLR1	FALSE
cg24447890	15	72892197	50	LMAN1L	FALSE
cg18081104	1	150092747	50	THEM5	FALSE
cg24789424	3	198784540	51	BDH	FALSE
cg11075745	1	42978563	51	CLDN19	FALSE
cg25425005	16	142905	51	HBZ	FALSE
cg11328149	6	31797438	51	LY6G6C	FALSE
cg17026542	6	132064183	51	OR2A4	FALSE
cg15343119	18	73090773	52	GALR1	TRUE	18:73090255-73093032
cg23555120	12	105057993	52	NUAK1	TRUE	12:105056077-105058153
cg18172186	6	130800007	52	KIAA1913	FALSE
cg27285056	19	55560691	52	NAPSA	FALSE
cg19850348	15	53668289	53	PYGO1	TRUE	15:53666933-53668690
cg02164046	3	188870842	53	SST	TRUE	3:188870156-188871038
cg16731240	19	57083062	53	ZNF577	TRUE	19:57082498-57083311
cg16297030	5	35083703	53	AGXT2	FALSE
cg21639401	17	38304194	53	FLJ31222	FALSE
cg11170796	19	1601224	53	TCF3	FALSE
cg13929328	10	129425888	54	FLJ46831	TRUE	10:129424072-129426344
cg10486998	18	73090775	54	GALR1	TRUE	18:73090255-73093032
cg23719124	1	110056442	54	GSTM5	TRUE	1:110056117-110056501
cg14458615	3	120347642	54	IGSF11	TRUE	3:120347421-120347771
cg23921534	X	82649903	54	POU3F4	TRUE	X:82649621-82651214
cg04629204	1	26220912	54	EXTL1	FALSE
cg16003913	16	67072	54	MPG	FALSE
cg16762386	1	27113101	54	NR0B2	FALSE
cg01450842	2	48649717	54	SALF	FALSE
cg15913671	17	76919015	54	TMEM105	FALSE
cg02844545	6	10990029	55	GCM2	TRUE	6:10989365-10990276
cg27371741	3	46594162	55	TDGF1	TRUE	3:46594072-46594386
cg24879335	3	134947870	55	TF	TRUE	3:134947530-134948249
cg03245641	11	64459991	55	GPHA2	FALSE
cg17964955	10	48010942	55	RBP3	FALSE
cg16177830	16	11966520	55	TNFRSF17	FALSE
cg16581199	5	112798620	55	TSSK1	FALSE
cg04005707	4	48683078	56	FLJ21511	TRUE	4:48682670-48683738
cg24435562	5	140573637	56	PCDHB13	TRUE	5:140573526-140573747
cg25995460	1	22836743	56	C1QA	FALSE
cg21478437	1	204484026	56	CTSE	FALSE
cg05039054	X	33267703	56	DMD	FALSE
cg00757070	11	118332292	56	UPK2	FALSE
cg27508002	13	36352023	57	SMAD9	TRUE	13:36351769-36352075
cg08099701	15	24742753	57	GABRA5	FALSE
cg11091262	7	151284387	57	GALNTL5	FALSE
cg03891191	1	12839585	57	PRAMEF2	FALSE
cg13688966	3	150675067	57	TM4SF4	FALSE
cg20485165	20	43186463	57	WFDC12	FALSE
cg17399166	1	156416419	58	CD1D	FALSE
cg02982734	15	21442141	59	MAGEL2	TRUE	15:21442139-21442830
cg06255227	20	62208569	59	NPBWR2	TRUE	20:62207758-62208595
cg20630151	3	140305776	59	BPESC1	FALSE
cg19297688	9	5221360	59	INSL4	FALSE
cg13351406	22	34361187	59	LOC284912	FALSE
cg11328541	19	14771889	59	OR7C1	FALSE
cg12343777	17	7883067	60	ALOX15B	FALSE
cg17186163	10	44794323	60	C10orf10	FALSE
cg03112869	3	48388773	60	FBXW12	FALSE
cg20373326	16	80626304	60	HSD17B2	FALSE
cg07611925	21	34658253	60	KCNE2	FALSE
cg24365867	11	10672171	60	MRVI1	FALSE
cg14003512	2	87828661	60	PLGLB2	FALSE
cg01732037	1	166516842	60	TBX19	FALSE
cg07189381	19	60352326	60	TNNT1	FALSE
cg10968815	20	31059007	61	BPIL1	FALSE
cg22478614	8	7789670	61	DEFB4	FALSE
cg17241310	1	90955444	62	BARHL2	TRUE	1:90954376-90957242
cg02831294	10	5556862	62	CALML3	FALSE
cg07338205	2	169466026	62	G6PC2	FALSE
cg24794992	16	21597398	62	OTOA	FALSE
cg15754084	12	7234287	62	PEX5	FALSE
cg09871043	6	52060320	62	PKHD1	FALSE
cg14289511	16	24589947	63	FLJ45256	TRUE	16:24589802-24590005
cg04336379	7	5078195	63	LOC389458	TRUE	7:5078039-5078627
cg20674577	20	57612935	63	PHACTR3	TRUE	20:57612715-57614362
cg05292376	17	76709831	63	AATK	FALSE
cg27257408	15	76313891	63	ACSBG1	FALSE
cg19949550	14	93493457	63	ASB2	FALSE
cg15016628	X	135397854	63	BRS3	FALSE
cg25455753	15	90815974	63	C15orf32	FALSE
cg21372914	19	7734144	63	CLEC4M	FALSE
cg24928687	1	224079536	63	EPHX1	FALSE
cg12619162	10	43187161	63	FXYD4	FALSE
cg18509239	3	152659124	63	IGSF10	FALSE
cg17827767	10	85991134	63	LRRC21	FALSE
cg22441882	8	20084934	63	SLC18A1	FALSE
cg06092815	2	228754650	64	SKIP	TRUE	2:228754274-228755173
cg11113534	20	31219685	64	C20orf70	FALSE
cg07549715	20	2972204	64	GNRH2	FALSE
cg23696712	12	51514408	64	KRT6L	FALSE
cg14107638	X	151037036	64	MAGEA5	FALSE
cg12855851	6	41823163	64	PGC	FALSE
cg21604856	22	21204677	64	SUHW1	FALSE
cg08453096	2	43919397	65	ABCG5	FALSE
cg24389347	3	127760383	65	C3orf22	FALSE
cg03801286	21	34806378	65	KCNE1	FALSE
cg12970081	19	55965736	66	GPR32	TRUE	19:55965707-55965934
cg12650635	12	48630730	66	AQP2	FALSE
cg21991396	1	245648040	66	CIAS1	FALSE
cg06285340	15	72446954	66	CYP11A1	FALSE
cg04956382	5	137231539	66	MYOT	FALSE
cg25322008	11	4675714	66	OR51E2	FALSE
cg12370791	17	44058649	67	HOXB9	TRUE	17:44057124-44059246
cg27132814	20	18742303	67	C20orf79	FALSE
cg14120436	15	50270790	67	GNB5	FALSE
cg20781967	12	642949	67	NINJ2	FALSE
cg15092802	9	137577873	67	OBP2A	FALSE
cg04048249	11	116205766	68	APOC3	FALSE
cg08539093	9	135074381	68	OBP2B	FALSE
cg12731488	X	37778155	68	SYTL5	FALSE
cg09229960	X	153261050	69	EMD	TRUE	X:153259464-153261581
cg17078393	1	32489589	69	LCK	TRUE	1:32489393-32489639
cg17501569	16	751065	69	MSLN	TRUE	16:750966-751193
cg16545105	5	76284505	69	CRHBP	FALSE
cg07123548	19	45588003	69	HIPK4	FALSE
cg20582779	1	220787998	69	KIAA1822L	FALSE
cg02649337	X	148671471	69	MAGEA9	FALSE
cg26389232	15	22847786	69	PWCR1	FALSE
cg20015855	15	66724616	70	CORO2B	TRUE	15:66724510-66724769
cg03557733	17	39340709	70	MPP2	TRUE	17:39339717-39340797
cg23174481	19	7468555	70	FLJ35784	FALSE
cg27566805	1	214663431	70	USH2A	FALSE
cg00546491	7	32077587	71	PDE1C	TRUE	7:32076278-32077689
cg21602160	17	38256798	71	AOC3	FALSE
cg18942631	1	116112864	71	CASQ2	FALSE
cg05761971	2	38031181	71	FAM82A	FALSE
cg15750705	1	34999294	71	GJB4	FALSE
cg19728577	1	42391750	71	GUCA2B	FALSE
cg05674036	17	3270541	71	OR3A3	FALSE
cg10379687	20	43609371	71	SPINLW1	FALSE
cg02284188	11	89181320	71	TRIM49	FALSE
cg21589115	19	54558926	72	DKKL1	TRUE	19:54557784-54559479
cg24330042	22	22714159	72	GSTT1	TRUE	22:22713988-22714557
cg04211807	X	73440678	72	ZCCHC13	TRUE	X:73440299-73441439
cg10235741	3	58175366	72	DNASE1L3	FALSE
cg02847216	18	18251801	73	CTAGE1	TRUE	18:18251775-18252151
cg25042226	2	113753041	73	PAX8	TRUE	2:113752884-113753146
cg15379633	22	21817586	73	RAB36	TRUE	22:21817260-21818058
cg09196942	1	12774206	73	PRAMEF1	FALSE
cg14898892	4	77575204	73	SHRM	FALSE
cg20451680	5	54317093	74	ESM1	TRUE	5:54316863-54317280
cg26756083	8	89408738	74	MMP16	TRUE	8:89408485-89410162
cg03986640	12	55134622	74	MIP	FALSE
cg03075662	3	147696338	74	PLSCR2	FALSE
cg06025017	1	180685841	74	RGSL2	FALSE
cg24857721	1	25471642	74	RHD	FALSE
cg18109798	12	20739740	74	SLCO1C1	FALSE
cg20312228	3	127596397	75	CCDC37	TRUE	3:127595793-127596808
cg07015629	2	213111457	75	ERBB4	TRUE	2:213109348-213112340
cg17542495	X	70359726	75	GJB1	TRUE	X:70359536-70359838
cg03399459	10	47217088	75	ANXA8	FALSE
cg21686987	16	73810474	75	CTRB1	FALSE
cg21045388	1	15300759	75	FLJ43806	FALSE
cg27592112	15	25343690	75	GABRG3	FALSE
cg14920334	12	4700088	75	GALNT8	FALSE
cg12795208	12	51132205	75	KRT6B	FALSE
cg18484189	11	7941549	75	NALP10	FALSE
cg03533058	12	50723838	75	NR4A1	FALSE
cg18182399	2	219991419	76	DES	TRUE	2:219991189-219992151
cg05807991	4	118226256	76	TRAM1L1	TRUE	4:118225823-118226399
cg21085768	16	2807089	76	PRSS21	FALSE
cg08495878	14	94097612	76	SERPINA4	FALSE
cg17356252	21	44530114	77	AIRE	TRUE	21:44529970-44530564
cg11825652	7	115926603	77	CAV2	TRUE	7:115926599-115927758
cg02204046	2	15998211	77	MYCN	TRUE	2:15997151-15998977
cg00462994	17	39437481	77	NAGS	TRUE	17:39437410-39438278
cg21414251	6	29472533	77	OR12D2	FALSE
cg12163490	16	63713342	78	CDH11	TRUE	16:63711989-63713859
cg11991859	14	32478278	78	NPAS3	TRUE	14:32477318-32479136
cg05131835	17	59312877	78	GH2	FALSE
cg17784922	7	142369547	78	KEL	FALSE
cg17405586	12	51360524	78	KRT1	FALSE
cg18982568	12	51383436	78	KRT1B	FALSE
cg19823847	6	138581399	78	PBOV1	FALSE
cg07911673	17	8138817	78	SLC25A35	FALSE
cg01743008	X	151672941	79	MAGEA2	TRUE	X:151672876-151673193
cg26220985	1	166964973	79	DPT	FALSE
cg21466821	19	45588013	79	HIPK4	FALSE
cg01074640	9	21218142	79	IFNA17	FALSE
cg23256150	12	99391889	79	NR1H4	FALSE
cg27472295	6	83130338	80	TPBG	TRUE	6:83129980-83132165
cg08826839	2	162808371	80	FAP	FALSE
cg18971054	7	141342228	80	MGAM	FALSE
cg01429391	14	22974770	80	MYH7	FALSE
cg12114524	1	199657417	80	TNNI1	FALSE
cg24454579	19	58486606	81	BIRC8	TRUE	19:58485716-58486658
cg16072462	4	75066622	81	PF4	TRUE	4:75066388-75066770
cg26922202	9	35947984	81	OR2S2	FALSE
cg26822175	22	25348010	82	CRYBA4	FALSE
cg06956273	1	109957146	82	GNAT2	FALSE
cg04200192	3	185232108	82	HTR3D	FALSE
cg08763351	1	151209834	82	SPRR4	FALSE
cg27519424	21	37284290	83	HLCS	TRUE	21:37283461-37285036
cg09272256	10	5228881	83	AKR1C4	FALSE
cg21148892	2	70901157	83	CLEC4F	FALSE
cg26424956	6	34209504	83	GRM4	FALSE
cg19403377	17	51155224	83	TMEM100	FALSE
cg03704031	X	70628940	84	INGX	TRUE	X:70628205-70629896
cg06577725	3	174341611	84	SPATA16	TRUE	3:174341533-174341882
cg01255591	20	42399124	84	R3HDML	FALSE
cg02005755	7	135063389	84	SLC13A4	FALSE
cg14934821	9	138348641	85	GPSM1	TRUE	9:138348614-138348948
cg08370996	15	94675035	85	NR2F2	TRUE	15:94674239-94677008
cg19668234	3	46734453	85	TSP50	TRUE	3:46733944-46734676
cg27050763	1	245148217	85	AHCTF1	FALSE
cg06589885	1	144124550	85	HFE2	FALSE
cg18096388	2	242449646	85	PDCD1	FALSE
cg00406844	22	31083939	85	RFPL3	FALSE
cg25383242	16	74901164	86	CNTNAP4	TRUE	16:74901143-74901361
cg26673195	17	38306255	86	G6PC	FALSE
cg15423764	11	58256109	86	GLYAT	FALSE
cg11465372	12	51457458	86	KRT2B	FALSE
cg20804101	12	242177	86	SLC6A13	FALSE
cg14014225	22	36809182	87	SLC16A8	TRUE	22:36809096-36809364
cg04592706	1	94359180	87	ABCA4	FALSE
cg04484789	17	36181850	87	KRT25B	FALSE
cg26917999	8	20157170	87	LZTS1	FALSE
cg25593948	6	50894629	87	TFAP2B	FALSE
cg25651984	X	140819258	88	MAGEC1	TRUE	X:140819187-140819447
cg13164537	18	65775051	88	CD226	FALSE
cg06141025	12	21648733	88	GYS2	FALSE
cg20862119	12	51457284	88	KRT2B	FALSE
cg11456838	6	159198742	88	LOC202459	FALSE
cg16725130	12	54522914	88	MMP19	FALSE
cg25112191	1	150070884	88	RORC	FALSE
cg02440177	19	58188507	89	ZNF702	TRUE	19:58187792-58189007
cg07011110	6	26608461	89	BTN1A1	FALSE
cg00466436	20	71163	89	DEFB126	FALSE
cg08816023	5	142045723	89	FGF1	FALSE
cg22960952	4	76700193	89	FLJ23657	FALSE
cg08906015	19	51849665	89	MGC15476	FALSE
cg07810156	1	47428269	89	PDZK1IP1	FALSE
cg24643262	X	15428783	90	BMX	TRUE	X:15428757-15429114
cg09715672	10	88718258	90	C10orf116	TRUE	10:88717963-88718893
cg04545708	11	111255565	90	C11orf1	FALSE
cg12827188	4	155731437	90	FGA	FALSE
cg18806980	16	82995624	90	KIAA0703	FALSE
cg22643217	21	31175835	90	KRTAP11-1	FALSE
cg21961766	19	54778190	90	PRRG2	FALSE
cg11854877	X	153767738	91	F8A1	TRUE	X:153767233-153768860
cg02248486	7	27149721	91	HOXA5	TRUE	7:27147983-27152159
cg07979357	19	14003353	91	IL27RA	TRUE	19:14003265-14004096
cg23812886	X	47941234	91	SSX5	TRUE	X:47941128-47941340
cg14561282	4	176076043	91	ADAM29	FALSE
cg09120035	8	143958147	91	CYP11B1	FALSE
cg17386181	16	55243403	91	MT1B	FALSE
cg08747377	16	81218171	92	CDH13	TRUE	16:81217810-81219323
cg26656113	4	73116477	92	NPFFR2	TRUE	4:73116364-73116958
cg12078929	22	41226632	92	SERHL	TRUE	22:41225823-41227067
cg25623640	4	71751036	92	IGJ	FALSE
cg22290566	15	72892339	92	LMAN1L	FALSE
cg23324787	11	36576270	92	RAG2	FALSE
cg23181170	5	170143250	93	GABRP	FALSE
cg01333788	1	34993401	93	GJB5	FALSE
cg24926276	19	4490943	93	LRG1	FALSE
cg01941619	18	28024079	93	MEP1B	FALSE
cg03264414	9	137593518	93	PAEP	FALSE
cg23504707	14	59782316	93	PPM1A	FALSE
cg03544320	4	5945592	94	CRMP1	TRUE	4:5944246-5946191
cg14695751	2	202379537	94	ALS2CR7	FALSE
cg09212468	16	56286133	94	C16orf50	FALSE
cg02010852	9	125158176	94	CRB2	FALSE
cg12167564	1	234113657	94	LYST	FALSE
cg02601403	17	31616166	94	TBC1D3C	FALSE
cg05942970	10	133805517	95	C10orf39	TRUE	10:133805370-133805647
cg04245402	19	702241	95	C19orf21	TRUE	19:702077-702289
cg10707565	10	17211701	95	CUBN	FALSE
cg08504583	13	77213585	95	FLJ30046	FALSE
cg11295113	11	71605586	95	FOLR2	FALSE
cg23737768	17	36113623	95	KRT24	FALSE
cg10364182	11	36572574	95	LOC119710	FALSE
cg25366404	6	40003338	95	MOCS1	FALSE
cg20862496	8	143820736	95	SLURP1	FALSE
cg17687282	3	139333801	96	A4GNT	FALSE
cg07125166	3	48388617	96	FBXW12	FALSE
cg25650811	7	31523600	97	LOC223075	TRUE	7:31523575-31524017
cg11706111	16	70080645	97	ZNF19	TRUE	16:70080524-70081125
cg07047653	12	48630893	97	AQP2	FALSE
cg11692021	12	6819733	97	GNB3	FALSE
cg06324671	21	30855382	97	KRTAP19-7	FALSE
cg12584889	X	102234581	97	NXF3	FALSE
cg10331038	1	173642651	97	TNR	FALSE
cg10221501	16	65157895	98	CMTM1	TRUE	16:65157441-65158454
cg14473924	3	73756860	98	PDZRN3	TRUE	3:73755774-73757236
cg10874403	3	87408525	98	POU1F1	FALSE
cg07499072	5	52812451	99	FST	TRUE	5:52811100-52812543
cg24384676	14	36711715	99	SLC25A21	TRUE	14:36710824-36711766
cg19305227	15	43331627	99	SLC28A2	TRUE	15:43331294-43331673
cg00295325	2	169596178	99	ABCB11	FALSE
cg04297093	21	30786245	99	KRTAP19-3	FALSE
cg18023080	1	11029971	99	MASP2	FALSE
cg10046892	1	154484566	99	PAQR6	FALSE
cg15590780	1	214663262	99	USH2A	FALSE
cg10000775	4	186693550	100	PDLIM3	TRUE	4:186692804-186694021
cg08141989	17	7023286	100	ASGR1	FALSE
cg06226384	17	62303813	100	CACNG5	FALSE
cg24908058	19	54239014	100	CGB5	FALSE
cg19404979	19	53189843	100	ELSPBP1	FALSE
cg10834677	1	113064812	100	FAM19A3	FALSE
cg19635695	10	95362435	100	PDE6C	FALSE
cg10784341	6	143970993	100	PHACTR2	FALSE
cg13997435	1	151805030	100	S100A2	FALSE
cg14366490	19	17432825	100	TXNL6	FALSE
cg05047411	X	148770553	101	MAGEA8	TRUE	X:148770535-148770742
cg25720804	5	170668994	101	TLX3	TRUE	5:170667594-170672661
cg07664856	3	1109528	101	CNTN6	FALSE
cg14209518	11	113671846	101	NNMT	FALSE
cg26153631	12	52665323	102	HOXC10	TRUE	12:52664872-52666801
cg24887211	14	76362378	102	C14orf166B	FALSE
cg09256683	17	31337750	102	CCL14	FALSE
cg01541443	7	30151840	102	Ells1	FALSE
cg23773532	12	12994483	102	GPRC5D	FALSE
cg14792155	15	40076910	102	PLA2G4E	FALSE
cg23338993	2	234265162	102	UGT1A6	FALSE
cg08463485	3	123223617	103	ILDR1	TRUE	3:123223586-123224478
cg05921324	11	116199324	103	APOA4	FALSE
cg24276445	6	88911672	103	CNR1	FALSE
cg09702010	19	56223205	103	KLK11	FALSE
cg07842062	16	3246525	103	MEFV	FALSE
cg27160701	12	53534691	103	SBEM	FALSE
cg18509435	18	57308859	104	CDH20	TRUE	18:57308846-57309047
cg00600110	X	8729528	104	FAM9A	TRUE	X:8729086-8729604
cg05594230	X	70629128	104	INGX	TRUE	X:70628205-70629896
cg16390856	X	151688792	104	MAGEA3	TRUE	X:151688663-151689075
cg14088811	11	47356570	104	SPI1	TRUE	11:47356386-47356586
cg21207436	14	73885069	104	C14orf115	FALSE
cg04498679	6	32003577	104	C2	FALSE
cg08815403	4	88463166	104	HSD17B13	FALSE
cg06958211	15	38319472	104	PAK6	FALSE
cg08365982	3	8750601	105	CAV3	TRUE	3:8750552-8750774
cg02854090	6	25834874	105	HIST1H2AA	TRUE	6:25834320-25834896
cg17277939	12	68379275	105	MGC13168	TRUE	12:68379242-68379452
cg11873854	9	138762696	105	LCN6	FALSE
cg21066636	17	4622041	105	TM4SF5	FALSE
cg27344326	X	72014529	106	DMRTC1	TRUE	X:72014516-72014901
cg03478689	5	83716473	106	EDIL3	TRUE	5:83715224-83716675
cg02602411	9	103396998	106	PPP3R2	TRUE	9:103396568-103397298
cg07443748	22	15453594	106	CESK1	FALSE
cg19984039	1	190872011	106	RGS13	FALSE
cg23464269	2	234302406	106	UGT1A3	FALSE
cg20507276	1	246167223	107	OR2L13	TRUE	1:246166629-246167405
cg17919471	X	52913717	107	XAGE3	TRUE	X:52913338-52913733
cg07258507	14	22911965	107	IL17E	FALSE
cg21518208	12	51047683	107	KRTHB5	FALSE
cg24812167	9	138413179	107	SNAPC4	FALSE
cg12718562	15	71952914	107	TBC1D21	FALSE
cg16495265	17	44026009	108	HOXB5	TRUE	17:44025432-44027432
cg08418111	11	18390321	108	LDHC	TRUE	11:18389965-18390649
cg00691625	9	126309628	108	NR5A1	TRUE	9:126309430-126309676
cg13370916	X	67784128	108	STARD8	TRUE	X:67784063-67784532
cg15514848	1	169484179	108	FMO1	FALSE
cg07356189	X	153176523	109	CXorf2	TRUE	X:153176146-153176720
cg22699362	2	118491897	109	FLJ10996	TRUE	2:118491433-118491912
cg04488521	5	178420322	109	ZNF354C	TRUE	5:178419646-178420866
cg21660130	1	16242830	109	CLCNKB	FALSE
cg21909391	3	189378916	109	FLJ42393	FALSE
cg18328334	2	218516897	109	TNS1	FALSE
cg22496683	4	155922060	110	MGC27016	TRUE	4:155921599-155922908
cg09638834	6	150388190	110	RAET1L	FALSE
cg23111544	2	79200982	110	REG1A	FALSE
cg21137417	2	234624195	110	SPP2	FALSE
cg10193817	11	114880436	111	IGSF4	TRUE	11:114880058-114881146
cg17398613	21	42792922	111	SLC37A1	TRUE	21:42792735-42793017
cg15662251	1	26070442	111	PAQR7	FALSE
cg10009830	X	20044825	112	FLJ14503	TRUE	X:20043987-20046213
cg03562120	20	42777411	112	WISP2	TRUE	20:42777169-42777483
cg15475323	19	53911914	112	FLJ36070	FALSE
cg16001913	10	70699650	112	HK1	FALSE
cg01714932	12	9252121	112	PZP	FALSE
cg22776578	5	175156103	113	CPLX2	TRUE	5:175156069-175157465
cg15554401	1	34999478	113	GJB4	TRUE	1:34999454-35000017
cg03330516	20	61649188	113	SRMS	TRUE	20:61648644-61649388
cg05666713	1	199448506	113	DKFZp434B1231	FALSE
cg13131015	12	14740809	113	GUCY2C	FALSE
cg11554937	9	98104142	113	HSD17B3	FALSE
cg12493906	11	4965887	113	MMP26	FALSE
cg02721374	17	2942927	113	OR1D2	FALSE
cg08634024	7	143288110	113	OR2F1	FALSE
cg20748065	7	75421357	114	POR	TRUE	7:75421205-75421476
cg15521097	X	54841284	114	ITIH5L	FALSE
cg07014174	21	31175631	114	KRTAP11-1	FALSE
cg21624282	13	112078784	114	LOC122258	FALSE
cg03923277	12	102883862	115	TDG	TRUE	12:102883345-102884290
cg09405083	10	104526111	115	C10orf26	FALSE
cg20416179	6	150731836	115	C6orf71	FALSE
cg05484458	12	6819521	115	GNB3	FALSE
cg13882988	10	54201351	115	MBL2	FALSE
cg17625032	16	55612241	115	NOD27	FALSE
cg05828624	2	79201207	115	REG1A	FALSE
cg27496506	15	41346462	115	TGM5	FALSE
cg19224837	14	94306368	116	GSC	TRUE	14:94304190-94306783
cg23900225	10	35934228	116	CX40.1	FALSE
cg21979032	3	42892521	116	CYP8B1	FALSE
cg27214365	4	145160062	116	GYPB	FALSE
cg23350580	17	31616188	116	TBC1D3C	FALSE
cg13912117	8	132123737	117	ADCY8	TRUE	8:132120798-132124201
cg23504246	15	47502634	117	FGF7	FALSE
cg05221167	19	9470397	118	ZNF560	TRUE	19:9469758-9470740
cg01446393	3	58538649	118	FAM107A	FALSE
cg03386869	13	100902849	118	ITGBL1	FALSE
cg15983005	17	36760464	118	KRTHA3A	FALSE
cg10125195	12	53314812	118	LACRT	FALSE
cg06236276	6	160600068	119	SLC22A2	TRUE	6:160600019-160600273
cg06793062	16	74901369	119	CNTNAP4	FALSE
cg16075940	6	109664391	119	FLJ37396	FALSE
cg00042156	10	42290848	119	MGC16291	FALSE
cg08385610	8	20156963	120	LZTS1	TRUE	8:20156750-20157009
cg06458239	19	62730385	120	ZNF549	TRUE	19:62730278-62731195
cg04749372	7	30758396	120	INMT	FALSE
cg11822932	11	33870292	120	LMO2	FALSE
cg15422147	18	59295319	120	SERPINB5	FALSE
cg20357806	4	75072643	121	PPBP	FALSE
cg09448875	10	101532439	122	ABCC2	FALSE
cg21407055	11	3623059	122	ART1	FALSE
cg02100848	3	8668859	122	C3orf32	FALSE
cg17890764	3	52839856	122	ITIH4	FALSE
cg00550617	17	36659343	122	KRTAP9-4	FALSE
cg16739580	3	192661768	122	POP2	FALSE
cg07007400	12	50913098	123	KRT7	TRUE	12:50912973-50913926
cg14238120	1	22200613	123	ELA3A	FALSE
cg06323290	10	70699885	123	HK1	FALSE
cg11134443	2	143351788	123	KYNU	FALSE
cg18920397	1	159032429	123	LY9	FALSE
cg23278885	20	2309431	123	TGM6	FALSE
cg22767466	11	89181514	123	TRIM49	FALSE
cg10923408	13	30404710	124	MGC40178	TRUE	13:30404651-30404896
cg10569414	21	42315323	124	C21orf121	FALSE
cg23414387	1	47037453	124	CYP4B1	FALSE
cg26960719	17	65582897	124	KCNJ16	FALSE
cg04802221	16	65781456	124	LOC283849	FALSE
cg19320612	2	166876436	124	SCN9A	FALSE
cg20556988	17	29714240	125	CCL1	FALSE
cg13904968	20	55569418	125	PCK1	FALSE
cg03835296	6	25938901	125	SLC17A1	FALSE
cg14533138	17	36779447	126	KRTHA3B	TRUE	17:36779251-36779455
cg18133966	12	119250101	126	PLA2G1B	FALSE
cg20858526	1	15637652	127	CTRC	FALSE
cg00436603	10	135190730	127	CYP2E1	FALSE
cg05316065	8	130868189	127	MLZE	FALSE
cg06119575	9	107464726	127	TAL2	FALSE
cg13742532	3	42825852	128	CCBP2	FALSE
cg09034896	13	113369467	128	GRK1	FALSE
cg17091851	16	68542440	129	LOC348174	TRUE	16:68542384-68542590
cg14127336	14	95250072	129	TCL1A	TRUE	14:95249952-95250699
cg02477931	11	131037931	129	C11orf39	FALSE
cg16831889	15	48345343	129	HDC	FALSE
cg17950095	7	27191225	130	HOXA11	TRUE	7:27189699-27192279
cg14256699	17	39191552	130	SOST	TRUE	17:39191384-39191613
cg25221625	22	23925955	130	CRYBB3	FALSE
cg13735697	1	201321919	130	MYOG	FALSE
cg15465321	X	119176625	130	PEPP-2	FALSE
cg26628847	7	142539426	130	PIP	FALSE
cg10212621	1	120113172	131	HMGCS2	FALSE
cg24098951	8	105670212	132	LRP12	TRUE	8:105669445-105671333
cg12832649	5	136862762	132	SPOCK	TRUE	5:136861841-136863150
cg05699806	X	2994985	132	ARSF	FALSE
cg04567009	1	159867393	132	FCGR3B	FALSE
cg27168844	6	52159276	132	IL17	FALSE
cg05241571	19	40673064	132	UNQ467	FALSE
cg18441959	22	20929332	132	VPREB1	FALSE
cg08997253	9	103540550	133	GRIN3A	TRUE	9:103538958-103541050
cg06489008	20	23381349	133	CST11	FALSE
cg14818279	5	148422747	133	SH3TC2	FALSE
cg01197831	9	96395762	134	FBP2	TRUE	9:96395689-96395929
cg06771126	4	57242456	134	HOP	FALSE
cg18997129	7	142815972	135	EPHA1	TRUE	7:142815700-142816331
cg00862290	3	180467667	135	KCNMB3	TRUE	3:180467337-180467703
cg02554564	12	5473392	135	NTF3	TRUE	12:5473265-5473465
cg05820087	3	194755255	135	ATP13A4	FALSE
cg12071073	13	51334282	135	CCDC70	FALSE
cg20311730	11	7941759	135	NALP10	FALSE
cg04756629	19	44861990	136	LOC400696	FALSE
cg09508556	6	31214961	136	PSORS1C2	FALSE
cg11896271	22	48951454	137	PANX2	TRUE	22:48949842-48951841
cg01781266	11	12355542	137	PARVA	TRUE	11:12355424-12356620
cg25020850	1	180908809	137	RGS8	FALSE
cg18338296	11	77452692	137	THRSP	FALSE
cg08521225	18	27425975	137	TTR	FALSE
cg02533173	19	15252124	138	BRD4	FALSE
cg00729275	18	22699132	138	C18orf16	FALSE
cg04979933	1	67039389	138	INSL5	FALSE
cg20226764	6	33879909	138	MLN	FALSE
cg21765730	6	155818867	138	NOX3	FALSE
cg05556202	3	197549503	138	TM4SF19	FALSE
cg01479232	20	696992	139	C20orf54	FALSE
cg12952132	19	60109459	139	NCR1	FALSE
cg15572745	14	77939985	139	NRXN3	FALSE
cg02442161	20	43237051	139	PI3	FALSE
cg23595927	4	661851	140	MYL5	TRUE	4:661751-662107
cg20063650	X	22200841	140	ZNF645	TRUE	X:22200683-22200981
cg27043873	5	20017186	140	CDH18	FALSE
cg00573606	2	237987419	140	COL6A3	FALSE
cg10938486	16	20328217	140	FLJ20581	FALSE
cg02555579	22	16423043	140	SLC25A18	FALSE
cg24183173	X	39847139	141	BCOR	TRUE	X:39846458-39847599
cg15842276	11	92342296	141	MTNR1B	TRUE	11:92342113-92343227
cg23440155	1	47037188	141	CYP4B1	FALSE
cg03780486	11	6773856	141	OR6A2	FALSE
cg02192965	2	44356244	141	SLC3A1	FALSE
cg18087477	1	115199120	142	SYCP1	TRUE	1:115198808-115199527
cg19723473	2	168383286	142	B3GALT1	FALSE
cg00396894	2	27215924	142	MGC44505	FALSE
cg19530885	5	147238325	142	SCGB3A2	FALSE
cg01870826	7	5078401	143	LOC389458	TRUE	7:5078039-5078627
cg21949781	18	41906364	143	PSTPIP2	TRUE	18:41905637-41906628
cg21519900	20	31134273	143	C20orf186	FALSE
cg06940107	21	28833654	143	C21orf100	FALSE
cg04459030	20	35318563	143	GHRH	FALSE
cg15077070	2	102169722	143	IL1RL2	FALSE
cg03885639	11	123986520	143	PANX3	FALSE
cg05633152	14	69333564	143	SLC10A1	FALSE
cg21153758	5	52119749	144	ITGA1	TRUE	5:52119061-52120216
cg16638540	19	63262280	144	ZNF135	TRUE	19:63262091-63264376
cg18534730	19	53239260	144	CABP5	FALSE
cg25107791	6	35872936	144	CLPS	FALSE
cg10503138	3	2117391	144	CNTN4	FALSE
cg17288121	8	7275424	144	DEFB103A	FALSE
cg07265310	12	51529189	144	K5B	FALSE
cg17829936	6	132952374	144	TAAR5	FALSE
cg13859324	17	30498805	144	UNC45B	FALSE
cg15974053	19	54031601	145	DHRS10	TRUE	19:54031203-54031666
cg05766474	17	31332781	145	CCL16	FALSE
cg27235662	3	191588680	145	CLDN16	FALSE
cg13126790	6	159930336	145	FLJ27255	FALSE
cg21431536	13	31211824	145	LGR8	FALSE
cg25391023	6	32482732	146	BTNL2	FALSE
cg23973566	6	24985708	146	C6orf32	FALSE
cg09422355	19	53238970	146	CABP5	FALSE
cg00463848	12	51332372	146	KRT2A	FALSE
cg05341878	8	104900822	146	RIMS2	FALSE
cg04962134	11	55409886	146	TRIM51	FALSE
cg05790038	17	3407893	146	TRPV3	FALSE
cg11523020	22	44059700	147	UPK3A	TRUE	22:44059213-44059803
cg01684901	3	185541099	147	C3orf40	FALSE
cg25372195	12	53328560	147	DCD	FALSE
cg01015871	16	55156689	147	MT4	FALSE
cg00582628	8	54927068	147	RGS20	FALSE
cg26379475	1	160648405	147	SH2D1B	FALSE
cg20879768	18	42816134	148	TCEB3B	TRUE	18:42814915-42816200
cg22375610	6	41129139	148	APOBEC2	FALSE
cg14722162	5	134811085	148	C5orf20	FALSE
cg09509673	17	38087223	148	CCR10	FALSE
cg26312920	7	31346915	148	NEUROD6	FALSE
cg06765947	3	127719432	148	UROC1	FALSE
cg12128839	7	27149961	149	HOXA5	TRUE	7:27147983-27152159
cg01830294	7	116750728	149	WNT2	TRUE	7:116749909-116752225
cg27183007	7	50103521	149	ZPBP	TRUE	7:50103013-50103606
cg09600520	6	4651243	149	CDYL	FALSE
cg16983159	5	138842625	149	LOC340061	FALSE
cg15798153	7	90176797	149	PFTK1	FALSE
cg13133883	10	85994640	149	RGR	FALSE
cg22445920	5	150663371	149	SLC36A3	FALSE
cg25249068	3	134601630	150	BFSP2	FALSE
cg03038672	16	3002057	150	CLDN9	FALSE
cg01612158	1	155834344	150	FCRL4	FALSE
cg26924825	16	66535366	150	LCAT	FALSE
cg01564343	6	41229898	150	TREML1	FALSE
cg08977028	X	151653733	151	CSAG1	TRUE	X:151653717-151653951
cg01356829	1	67545484	151	IL12RB2	TRUE	1:67545435-67546605
cg00638514	17	70443643	151	OTOP3	TRUE	17:70443189-70444298
cg10242476	3	46594368	151	TDGF1	TRUE	3:46594072-46594386
cg20797216	19	8118234	151	FBN3	FALSE
cg17463527	20	41621251	151	SGK2	FALSE
cg11375102	16	1523811	152	C16orf30	TRUE	16:1523788-1524691
cg26026726	19	40554254	152	GPR42	TRUE	19:40554102-40554302
cg24697329	2	131390846	152	ARHGEF4	FALSE
cg21930712	19	56452928	152	FLJ40235	FALSE
cg05492113	11	8016908	152	TUB	FALSE
cg04048259	20	57308741	153	EDN3	TRUE	20:57308563-57309693
cg27069753	1	22176158	153	ELA3B	FALSE
cg17628717	7	43317733	154	HECW1	TRUE	7:43317647-43318185
cg05010967	6	44418618	154	SPATS1	TRUE	6:44418135-44418640
cg21591452	17	76919223	154	TMEM105	TRUE	17:76919186-76919387
cg03573747	3	188043311	154	ADIPOQ	FALSE
cg01514487	12	55730314	154	MYO1A	FALSE
cg07126559	13	22652937	154	SGCG	FALSE
cg25218351	2	27358950	154	TRIM54	FALSE
cg05628549	11	6298471	155	PRKCDBP	TRUE	11:6297418-6298977
cg22972055	7	838819	155	UNC84A	TRUE	7:838536-838925
cg16122592	X	26120633	155	MAGEB6	FALSE
cg12286890	1	166779691	155	XCL2	FALSE
cg06132342	12	51047420	156	KRTHB5	TRUE	12:51046994-51047538
cg12629325	5	140286642	156	PCDHAC1	TRUE	5:140285591-140287803
cg10545682	1	149779249	156	TUFT1	TRUE	1:149779125-149780093
cg17504145	22	23947229	156	CRYBB2	FALSE
cg15583072	12	21416929	156	IAPP	FALSE
cg20191453	3	49434859	157	AMT	TRUE	3:49434750-49435011
cg26181372	9	103238083	157	ALDOB	FALSE
cg20312687	20	29420246	157	DEFB118	FALSE
cg07864297	14	75907322	157	ESRRB	FALSE
cg11504740	11	66976619	157	GPR152	FALSE
cg23514672	16	10696145	158	FLJ32871	TRUE	16:10695863-10696148
cg24477636	19	15780005	158	OR10H1	FALSE
cg18330203	1	199613270	158	TNNT2	FALSE
cg22368262	10	71060179	159	C10orf35	TRUE	10:71059654-71060479
cg23509027	X	151633853	159	CSAG3A	TRUE	X:151633606-151633920
cg23290344	8	24827371	159	NEF3	TRUE	8:24826692-24829288
cg20615832	4	74938036	159	PF4V1	TRUE	4:74937959-74938279
cg19685066	1	17954590	159	ACTL8	FALSE
cg16678925	17	3047722	159	OR1A2	FALSE
cg05590982	16	28457672	159	P8	FALSE
cg06403553	6	49862807	159	PGK2	FALSE
cg24240626	2	79240228	159	REG3A	FALSE
cg27226949	13	105985178	160	EFNB2	TRUE	13:105984303-105987145
cg25780543	7	154493703	160	HTR5A	TRUE	7:154493509-154494357
cg10862535	19	51218323	160	PGLYRP1	TRUE	19:51218309-51218565
cg06437862	13	18654096	160	TUBA2	TRUE	13:18653806-18654153
cg11706163	5	39400252	160	C9	FALSE
cg15914863	7	989201	160	CYP2W1	FALSE
cg07115820	17	53625248	160	EPX	FALSE
cg04879235	17	39374388	160	PPY	FALSE
cg24765446	20	43601388	160	WFDC6	FALSE
cg25531166	X	153500553	161	CTAG1B	TRUE	X:153500328-153500793
cg24713204	19	61711185	161	ZNF471	TRUE	19:61710502-61711930
cg21932814	3	123526862	161	CSTA	FALSE
cg13656062	19	15869723	161	CYP4F2	FALSE
cg18754342	12	14740535	161	GUCY2C	FALSE
cg06470471	3	54936951	161	LRTM1	FALSE
cg08191915	11	123986824	161	PANX3	FALSE
cg14271690	20	36643413	161	SMAF1	FALSE
cg05740244	11	18390591	162	LDHC	TRUE	11:18389965-18390649
cg15759873	2	46600438	162	ATP6V1E2	FALSE
cg10282491	16	3002369	162	CLDN9	FALSE
cg11721194	1	158975863	162	SLAMF7	FALSE
cg07412254	2	120940004	163	FLJ14816	TRUE	2:120939973-120940445
cg09137696	16	55229916	163	MT1A	TRUE	16:55229309-55230226
cg26556134	12	51778996	163	SOAT2	FALSE
cg19233472	5	169465330	165	FOXI1	TRUE	5:169465139-169465394
cg08214029	17	31415591	165	CCL18	FALSE
cg10161121	1	170894643	165	FASLG	FALSE
cg24244000	15	25343930	165	GABRG3	FALSE
cg00596686	X	7147332	165	STS	FALSE
cg26246138	X	18282533	166	SCML2	TRUE	X:18281707-18283582
cg24919884	1	3370148	166	ARHGEF16	FALSE
cg06710648	1	58488965	166	DAB1	FALSE
cg16405957	12	51332060	166	KRT2A	FALSE
cg23645091	12	51200676	166	KRT5	FALSE
cg07705908	6	34631903	166	SPDEF	FALSE
cg19815589	11	70386710	167	LOC220070	FALSE
cg26504906	6	27323654	167	PRSS16	FALSE
cg19857541	3	110319490	168	MORC1	TRUE	3:110319373-110319935
cg08256781	19	6086510	168	ACSBG2	FALSE
cg05684195	3	9895572	168	CIDEC	FALSE
cg20541456	5	156629098	168	CYFIP2	FALSE
cg14153740	7	141604179	168	TRY1	FALSE
cg17496921	19	11267993	169	TSPAN16	FALSE
cg15543551	3	193927896	170	FGF12	TRUE	3:193927501-193928340
cg06384491	X	57180613	170	SPIN2	TRUE	X:57180226-57180702
cg19798224	14	99859262	170	C14orf68	FALSE
cg21518947	11	66979224	170	CABP4	FALSE
cg12428416	13	19615597	170	GJA3	FALSE
cg14456683	3	148609700	171	ZIC1	TRUE	3:148609249-148612068
cg12334759	19	426154	171	C19orf19	FALSE
cg18787449	X	151670926	171	MAGEA2B	FALSE
cg11096993	11	67174534	172	ACY3	TRUE	11:67174436-67174737
cg25674286	1	111848438	172	ADORA3	FALSE
cg06617418	X	109548769	172	RGAG1	FALSE
cg07441143	8	143821003	172	SLURP1	FALSE
cg03998348	15	36014577	172	TMCO5	FALSE
cg20576597	21	44956096	173	C21orf29	TRUE	21:44956096-44956362
cg03240509	12	4788430	173	KCNA6	TRUE	12:4788356-4789953
cg09068492	11	14950234	174	CALCA	TRUE	11:14949913-14950639
cg22059008	16	2788313	174	TESSP1	TRUE	16:2788298-2789206
cg00350478	6	168222862	174	FRMD1	FALSE
cg26701826	4	109034053	174	MGC26963	FALSE
cg06094150	16	55243138	174	MT1B	FALSE
cg07459489	8	118216344	174	SLC30A8	FALSE
cg24541550	11	10671936	175	MRVI1	FALSE
cg13274254	2	188865811	176	GULP1	TRUE	2:188864480-188866161
cg13181284	12	51131954	176	KRT6B	FALSE
cg15149938	22	48404396	176	LOC348645	FALSE
cg09205751	11	268394	176	NALP6	FALSE
cg07621046	10	118419648	177	C10orf82	TRUE	10:118419465-118419880
cg04897683	5	134899361	177	NEUROG1	TRUE	5:134898284-134900130
cg24926042	12	51086266	177	KRTHB2	FALSE
cg20725021	3	188492269	177	MASP1	FALSE
cg06263495	11	2248580	178	ASCL2	TRUE	11:2246594-2249861
cg02748539	5	577269	178	SLC9A3	TRUE	5:576269-577990
cg19985911	12	56495941	178	AVIL	FALSE
cg03140978	1	24600714	178	C1orf201	FALSE
cg20398120	2	219404934	178	PRKAG3	FALSE
cg26738010	18	570188	179	CETN1	TRUE	18:570046-571049
cg12572939	X	153767650	179	F8A1	TRUE	X:153767233-153768860
cg03609102	11	1201109	179	MUC5B	TRUE	11:1200863-1201126
cg17371081	11	20647533	179	NELL1	TRUE	11:20647014-20648558
cg05500074	19	54958148	179	TSKS	FALSE
cg24433189	16	1068690	180	SSTR5	TRUE	16:1068532-1070086
cg25946374	1	24342378	180	IL22RA1	FALSE
cg09261262	10	88404534	180	OPN4	FALSE
cg24636657	X	105167542	180	SERPINA7	FALSE
cg04640913	20	44313922	181	CDH22	FALSE
cg08088390	20	16170	181	DEFB125	FALSE
cg23207527	6	17391092	181	RBM24	FALSE
cg25575065	22	49413260	182	ARSA	TRUE	22:49412641-49414443
cg07271264	11	17697553	182	MYOD1	TRUE	11:17696873-17700534
cg23580945	17	34439867	182	FLJ43826	FALSE
cg08634464	19	2852147	183	LOC126295	TRUE	19:2850141-2853207
cg22672790	5	161045365	183	GABRA6	FALSE
cg25203856	11	7016556	183	NALP14	FALSE
cg09299388	6	49863149	183	PGK2	FALSE
cg06563300	12	99274942	183	SLC17A8	FALSE
cg19404190	5	147672366	183	SPINK7	FALSE
cg07109287	9	125813894	184	LHX2	TRUE	9:125813052-125815466
cg01474260	22	15453884	184	CESK1	FALSE
cg13837202	X	55263702	186	PAGE5	TRUE	X:55263379-55263750
cg18356799	18	26996631	186	DSC1	FALSE
cg15538427	11	62213590	186	LOC221091	FALSE
cg09874776	20	43764255	186	WFDC13	FALSE
cg06112415	2	27195662	187	CGREF1	TRUE	2:27195000-27195770
cg19512848	14	93533582	187	C14orf48	FALSE
cg12775479	3	152659374	187	IGSF10	FALSE
cg17240454	6	34632256	187	SPDEF	FALSE
cg11688469	1	199657684	187	TNNI1	FALSE
cg23131777	1	120240448	188	ADAM30	TRUE	1:120240390-120240877
cg06762858	7	99809192	188	PILRA	FALSE
cg06917325	11	62539699	188	SLC22A8	FALSE
cg21044104	3	42426880	189	LYZL4	FALSE
cg24854010	12	1596294	189	WNT5B	FALSE
cg06295856	11	14950218	190	CALCA	TRUE	11:14949913-14950639
cg15538820	9	135074639	190	OBP2B	FALSE
cg00695416	21	36364346	191	CBR1	TRUE	21:36363944-36364738
cg09542111	21	30233962	191	GRIK1	TRUE	21:30233131-30234502
cg17826679	19	10597038	191	SLC44A2	TRUE	19:10596881-10597536
cg26538442	16	65552448	191	FLJ21736	FALSE
cg10994126	1	174699121	191	PAPPA2	FALSE
cg07404485	7	94791589	191	PON1	FALSE
cg00136477	1	22842926	192	C1QC	FALSE
cg18752880	5	34079266	192	C1QTNF3	FALSE
cg24875415	20	23617470	192	CST4	FALSE
cg13297865	6	80714134	193	ELOVL4	TRUE	6:80713277-80714461
cg18223379	20	31083308	193	BPIL3	FALSE
cg27418851	10	54201659	193	MBL2	FALSE
cg14897096	11	66478649	193	PC	FALSE
cg13794642	X	47114733	193	ZNF157	FALSE
cg08981777	19	53189549	194	ELSPBP1	FALSE
cg25336198	11	2139194	194	INS	FALSE
cg15792367	19	56223296	194	KLK11	FALSE
cg15075718	11	118722386	194	MFRP	FALSE
cg05564251	2	230798884	194	SP140	FALSE
cg04457794	1	204484277	195	CTSE	FALSE
cg25013053	17	30499144	195	UNC45B	FALSE
cg04254916	12	51200314	196	KRT5	TRUE	12:51200186-51200389
cg19306866	21	30892868	196	KRTAP6-2	TRUE	21:30892865-30893091
cg00055233	9	5329677	196	RLN1	TRUE	9:5328869-5329825
cg04968426	15	38908003	196	PPP1R14D	FALSE
cg24975222	3	45162721	197	CDCP1	TRUE	3:45161842-45163260
cg16069910	19	17432528	197	TXNL6	TRUE	19:17432468-17432768
cg03160135	6	117693611	197	VGLL2	TRUE	6:117692316-117694016
cg15377518	2	144994583	197	ZFHX1B	TRUE	2:144994033-144994606
cg13084335	11	111287880	197	CRYAB	FALSE
cg25214366	8	7275083	197	DEFB103A	FALSE
cg05245515	14	20537113	197	SLC39A2	FALSE
cg01703884	12	108362557	198	FLJ37587	TRUE	12:108362343-108362608
cg20542190	19	59542431	198	LILRA4	TRUE	19:59542421-59542761
cg11206634	2	128174869	198	SFT2D3	TRUE	2:128174687-128174933
cg15186584	9	34387651	198	C9orf24	FALSE
cg08351331	20	36408497	198	LBP	FALSE
cg21985470	1	153538047	198	PKLR	FALSE
cg06501790	5	176743863	198	SLC34A1	FALSE
cg08201421	20	43889558	198	TNNC2	FALSE
cg19579782	10	17283886	199	DNMT2	TRUE	10:17283196-17283932
cg02077702	15	72252941	199	ISLR	FALSE
cg25473396	16	66819	199	MPG	FALSE
cg13282837	14	95250401	200	TCL1A	TRUE	14:95249952-95250699
cg23663653	14	105280252	200		TRUE	14:105280160-105280368
cg09816180	4	72868952	200	GC	FALSE
cg15233681	2	102137034	200	IL1R1	FALSE
cg06353345	11	5279552	200	OR51B4	FALSE
cg19630689	14	94054134	200	SERPINA12	FALSE
cg04453065	1	85819249	201	CYR61	TRUE	1:85818356-85819916
cg22881914	14	51605897	201	NID2	TRUE	14:51604216-51606602
cg16779976	10	98021115	201	BLNK	FALSE
cg21142398	1	53972666	201	GLIS1	FALSE
cg10479672	2	113527112	201	IL1F8	FALSE
cg02110963	6	10542961	201	MGC40222	FALSE
cg04806409	21	42608574	201	TFF3	FALSE
cg01988129	8	67507490	202	ADHFE1	TRUE	8:67506956-67507717
cg12582959	19	60851011	202	HSU79303	TRUE	19:60850950-60851849
cg09207718	15	72828439	202	CYP1A2	FALSE
cg21312148	1	150902698	202	LCE2D	FALSE
cg11830061	9	5175415	203	INSL6	TRUE	9:5175191-5175954
cg27409364	11	17714319	203	KCNC1	TRUE	11:17712319-17714962
cg06908778	10	22674608	203	SPAG6	TRUE	10:22673932-22675060
cg18967533	19	56164537	204	KLK6	FALSE
cg14912034	10	30958857	204	LYZL2	FALSE
cg09923855	X	135407132	205	HTATSF1	TRUE	X:135406317-135407906
cg23566335	8	39561504	205	ADAM18	FALSE
cg26063872	20	29491867	205	DEFB123	FALSE
cg24423088	21	31107236	205	KRTAP8-1	FALSE
cg23183296	4	70181011	205	UGT2B28	FALSE
cg04584523	1	22175799	206	ELA3B	FALSE
cg20832009	X	67784443	207	STARD8	TRUE	X:67784063-67784532
cg20444256	19	50518181	207	CKM	FALSE
cg08430598	20	23679367	207	CST1	FALSE
cg20300246	9	138236568	208	LHX3	TRUE	9:138236352-138237116
cg18676162	16	386985	208	NME4	TRUE	16:386594-387793
cg16648841	1	57093273	208	C8A	FALSE
cg16351002	10	124600091	208	CUZD1	FALSE
cg07944811	7	44195355	208	GCK	FALSE
cg12242338	3	141879779	208	TRIM42	FALSE
cg05800321	8	143864801	209	LY6D	TRUE	8:143864661-143864861
cg04891836	19	6621390	209	TNFSF14	FALSE
cg17296166	19	51666407	210	FLJ10781	TRUE	19:51666325-51667046
cg02490034	7	129913072	210	MEST	TRUE	7:129912883-129914215
cg10051054	1	3659032	210	CCDC27	FALSE
cg02019333	3	120374905	210	UPK1B	FALSE
cg05824215	6	167456036	211	CCR6	FALSE
cg23581186	21	31041180	211	KRTAP21-2	FALSE
cg17701886	3	184453527	212	B3GNT5	TRUE	3:184453437-184455435
cg17204557	2	120940379	212	FLJ14816	TRUE	2:120939973-120940445
cg26928972	3	123526489	212	CSTA	FALSE
cg10997248	11	117204229	212	FXYD2	FALSE
cg19196684	1	53380625	212	SLC1A7	FALSE
cg01091565	15	88095766	214	MESP1	FALSE
cg06100324	16	751348	214	MSLN	FALSE
cg04369341	20	41978436	215	C20orf100	TRUE	20:41976342-41978686
cg15425811	22	29648181	215	FLJ35801	TRUE	22:29647630-29649039
cg14598387	9	124329178	215	OR1N1	FALSE
cg13348944	11	117552331	215	SCN2B	FALSE
cg02157083	11	116168010	216	APOA5	FALSE
cg00546897	21	44056660	216	LOC284837	FALSE
cg23307338	11	60017043	216	MS4A12	FALSE
cg14607011	10	135021736	217	C10orf125	TRUE	10:135020610-135021994
cg26963271	1	66031669	217	PDE4B	TRUE	1:66030397-66031906
cg18414381	11	34599461	217	EHF	FALSE
cg23408620	4	187424489	217	F11	FALSE
cg26545162	17	71586687	217	LGICZ1	FALSE
cg22461018	4	174774586	217	MORF4	FALSE
cg24027679	1	9009208	217	SLC2A7	FALSE
cg02288165	20	3635992	217	SN	FALSE
cg02921257	3	39208862	219	CMYA1	FALSE
cg09917461	X	151654103	219	CSAG1	FALSE
cg06391660	2	74461691	219	DCTN1	FALSE
cg25545210	17	36791943	219	KRTHA4	FALSE
cg14696820	1	151066792	219	LCE1A	FALSE
cg15228639	15	40077231	219	PLA2G4E	FALSE
cg12240237	7	73584338	219	WBSCR23	FALSE
cg24824840	19	55911787	220	SHANK1	TRUE	19:55911787-55912150
cg24999727	4	88462842	220	HSD17B13	FALSE
cg08611714	17	36877384	220	KRTHA2	FALSE
cg16826286	17	31290403	220	LYZL6	FALSE
cg00079563	22	41583465	221	ARFGAP3	TRUE	22:41582136-41584116
cg03626672	2	237143403	221	CMKOR1	TRUE	2:237143297-237143512
cg10414946	11	59612934	221	MS4A2	FALSE
cg07363637	6	31954975	222	SLC44A4	TRUE	6:31954897-31955162
cg06638451	3	58538309	222	FAM107A	FALSE
cg11237817	19	59927574	222	KIR3DL3	FALSE
cg02595219	11	73856409	223	KCNE3	TRUE	11:73855641-73856427
cg03270204	6	30959617	223	DDR1	FALSE
cg20848130	1	226404399	223	GJA12	FALSE
cg11898695	6	42991482	223	PTCRA	FALSE
cg14721213	1	169421236	224	FMO2	FALSE
cg15787039	15	30721477	225	SGNE1	TRUE	15:30721114-30721502
cg16873863	11	2877752	225	SLC22A18	FALSE
cg13156121	16	56567615	225	TEPP	FALSE
cg17740645	17	35147939	226	GRB7	FALSE
cg11385473	11	31487519	226	IMMP1L	FALSE
cg16272420	10	118371034	226	PNLIPRP2	FALSE
cg11656547	9	71848567	227	MAMDC2	TRUE	9:71848534-71849733
cg19585882	X	47999968	227	SSX1	TRUE	X:47999947-48000238
cg13406950	1	89303252	227	GBP1	FALSE
cg14519134	3	130744520	227	H1FOO	FALSE
cg11884243	9	136912707	228	FCN2	TRUE	9:136912687-136912888
cg15433631	5	2804541	228	IRX2	TRUE	5:2801201-2806084
cg16790239	16	88512755	228	MC1R	TRUE	16:88512584-88512791
cg06952310	19	19188990	228	CSPG3	FALSE
cg16991589	13	24568047	229	PABPC3	TRUE	13:24567943-24568646
cg04875162	X	90576482	229	PABPC5	TRUE	X:90576124-90576920
cg17421623	3	120670260	229	C3orf9	FALSE
cg11323198	16	60627307	230	CDH8	TRUE	16:60625845-60628489
cg01668383	13	36577573	230	CSNK1A1L	TRUE	13:36577453-36577918
cg23629496	20	5982446	230	C20orf75	FALSE
cg14694011	15	49418316	230	CYP19A1	FALSE
cg18462653	20	29441837	230	DEFB119	FALSE
cg21165219	18	10688044	230	FAM38B	FALSE
cg05206587	X	14457801	230	GLRA2	FALSE
cg06264060	22	39404953	230	GPR24	FALSE
cg15464148	12	6615318	230	GPR92	FALSE
cg24346637	1	110456815	230	UBL4B	FALSE
cg26134665	16	30929045	231	STX1B2	TRUE	16:30929010-30930052
cg15531099	1	151037126	231	LCE1D	FALSE
cg22322184	19	7640203	231	RETN	FALSE
cg18780401	X	48700069	232	OTUD5	TRUE	X:48699066-48701313
cg18833140	10	115302543	232	HABP2	FALSE
cg17803965	1	32054399	232	SPOCD1	FALSE
cg12150401	7	122422758	232	TAS2R16	FALSE
cg24080529	22	31527034	232	TIMP3	FALSE
cg18988110	17	43390342	233	ATAD4	FALSE
cg09971811	20	24878099	233	CST7	FALSE
cg21615171	3	38282568	233	SLC22A13	FALSE
cg14924278	10	123738912	233	TACC2	FALSE
cg09052983	18	50646603	235	RAB27B	TRUE	18:50646305-50646862
cg14062083	21	30724700	235	KRTAP13-4	FALSE
cg18226566	6	11340651	236	NEDD9	TRUE	6:11340603-11340999
cg02600430	13	99421943	236	ZIC5	TRUE	13:99418103-99422494
cg22875391	3	190372693	236	FAM79B	FALSE
cg05887405	16	82539937	236	OKL38	FALSE
cg20395892	12	64869047	237	IRAK3	TRUE	12:64868542-64869736
cg04731384	16	88604267	237	MGC3101	TRUE	16:88604165-88604516
cg08045757	12	46478953	237	HDAC7A	FALSE
cg19109050	1	226462721	237	OBSCN	FALSE
cg16612699	11	123816428	237	OR8B8	FALSE
cg23322523	8	67201595	237	TRIM55	FALSE
cg02737335	1	3369744	238	ARHGEF16	TRUE	1:3369484-3369753
cg22762309	X	69198828	238	OTUD6A	TRUE	X:69198820-69200785
cg05119831	7	158072940	239	PTPRN2	TRUE	7:158071751-158074029
cg03851112	11	66034934	239	BBS1	FALSE
cg18350391	16	3055553	239	IL32	FALSE
cg19554294	19	58453680	239	VN1R2	FALSE
cg04618528	17	36899402	240	KRTHA6	TRUE	17:36899183-36899440
cg13694749	17	59403770	240	SCN4A	TRUE	17:59403667-59403892
cg05615487	22	49523273	240	ACR	FALSE
cg00297600	8	35521212	240	UNC5D	FALSE
cg00819310	1	115995306	240	VANGL1	FALSE
cg18241647	20	43186761	241	WFDC12	FALSE
cg02876062	10	14856660	242	FAM107B	TRUE	10:14856124-14856711
cg22418909	8	41285895	242	SFRP1	TRUE	8:41284820-41286784
cg03741352	1	150840074	242	LCE3C	FALSE
cg03731898	2	207512326	243	CPO	FALSE
cg10741760	1	19864611	244	HTR6	TRUE	1:19863719-19865436
cg24426405	7	16811377	244	AGR2	FALSE
cg12682367	13	23421698	244	FLJ46358	FALSE
cg21652012	5	170143587	244	GABRP	FALSE
cg09588653	5	149549469	244	SLC6A7	FALSE
cg22051763	12	100197803	245	UTP20	TRUE	12:100197274-100198442
cg04995095	17	70131151	245	CD300E	FALSE
cg04365980	16	76614237	245	CLEC3A	FALSE
cg23696949	1	181422267	245	LAMC2	FALSE
cg08251036	2	134725393	245	MGAT5	FALSE
cg26222045	16	19204357	245	UNQ5810	FALSE
cg19421752	5	1278224	246	SLC6A18	TRUE	5:1278028-1278231
cg06291334	17	45110770	246	SPOP	TRUE	17:45109732-45110886
cg07109801	3	49032665	247	C3orf60	TRUE	3:49032563-49032797
cg16009558	6	101953428	247	GRIK2	TRUE	6:101953329-101954569
cg15589427	3	197023792	247	MUC4	TRUE	3:197023584-197023914
cg01593385	4	155753599	247	FGG	FALSE
cg13696887	12	51086690	247	KRTHB2	FALSE
cg02947354	2	99283824	247	LOC129530	FALSE
cg11811840	2	234333905	247	UGT1A1	FALSE
cg05243804	18	53405236	248	FECH	TRUE	18:53404403-53405271
cg20291049	2	104838649	248	POU3F3	TRUE	2:104835039-104840521
cg24691461	20	30062162	248	C20orf160	FALSE
cg07685034	21	46094055	248	PCBP3	FALSE
cg26845278	1	16636258	248	SPATA21	FALSE
cg12456510	21	42644424	248	TFF2	FALSE
cg07747299	21	46428480	249	C21orf56	TRUE	21:46428476-46428709
cg04987894	1	110056139	249	GSTM5	TRUE	1:110056117-110056501
cg13359415	4	24641662	249	LGI2	TRUE	4:24640989-24642011
cg02064402	5	1278719	249	SLC6A18	FALSE
cg20647888	10	13083960	250	CCDC3	TRUE	10:13082953-13084076
cg25484904	4	48682772	250	FLJ21511	TRUE	4:48682670-48683738
cg17606194	10	135233117	251	SYCE1	TRUE	10:135232198-135233669
cg25538571	8	49665263	251	FLJ46365	FALSE
cg15905124	5	72500081	251	MGC13034	FALSE
cg03312792	20	43283173	251	SEMG2	FALSE
cg09358725	11	33870664	252	LMO2	FALSE
cg10528989	14	95792059	253	BDKRB1	FALSE
cg19145398	20	29897334	253	FKHL18	FALSE
cg23144899	2	208702618	254	CRYGC	TRUE	2:208702369-208702728
cg25006823	14	67052209	254	FLJ33387	TRUE	14:67051163-67052251
cg06060661	X	148604761	254	MAGEA11	FALSE
cg16752583	7	142293853	254	TRPV6	FALSE
cg20449692	3	171619614	255	CLDN11	TRUE	3:171618793-171620758
cg27009703	7	27171419	255	HOXA9	TRUE	7:27170287-27173690
cg24286301	X	108612196	255	GUCY2F	FALSE
cg22228134	14	24148449	255	GZMH	FALSE
cg02579133	21	44856169	255	KRTAP10-8	FALSE
cg21958034	3	49700844	255	MST1	FALSE
cg20227165	11	45072395	255	PRDM11	FALSE
cg07952391	2	88251288	256	FLJ10916	TRUE	2:88250312-88251497
cg16036738	14	54976760	256	TBPL2	TRUE	14:54976060-54977306
cg11003133	1	157313015	256	AIM2	FALSE
cg21607649	10	134734167	256	GPR123	FALSE
cg02500392	6	138581065	256	PBOV1	FALSE
cg11724759	1	68688486	256	RPE65	FALSE
cg26583078	4	187114772	256	SORBS2	FALSE
cg05823029	13	113360759	257	ATP4B	FALSE
cg17237881	20	61337978	257	BIRC7	FALSE
cg01671881	20	31268562	257	C20orf71	FALSE
cg14387505	16	31446447	257	ERAF	FALSE
cg15602735	X	141120999	257	MAGEC2	FALSE
cg16084788	1	9008733	258	SLC2A7	FALSE
cg11377136	22	45037624	259	PKDREJ	TRUE	22:45036485-45038116
cg03364781	4	113518042	259	ALPK1	FALSE
cg07597976	16	28850520	259	CD19	FALSE
cg26756862	7	142723082	259	CLCN1	FALSE
cg07637239	10	118947249	259	KCNK18	FALSE
cg21695020	16	66572127	260	DPEP3	TRUE	16:66571413-66572132
cg27210447	1	16221436	261	CLCNKA	FALSE
cg05798712	6	123142606	261	FABP7	FALSE
cg04996020	7	107231134	261	SLC26A3	FALSE
cg12989650	17	8154053	262	ARHGEF15	FALSE
cg02765820	3	127760710	262	C3orf22	FALSE
cg21142272	16	65781842	262	LOC283849	FALSE
cg19456540	14	60046038	263	SIX6	TRUE	14:60045112-60046647
cg24430616	8	23376361	263	ENTPD4	FALSE
cg07711097	8	143912956	263	GML	FALSE
cg08403419	1	154177862	263	RLN3R2	FALSE
cg10840135	22	40856563	264	CYP2D6	FALSE
cg18434152	1	110795047	264	PROK1	FALSE
cg03380645	2	85748559	264	SFTPB	FALSE
cg14544583	11	5205142	265	HBB	FALSE
cg02280309	1	153537584	265	PKLR	FALSE
cg20535085	1	158883228	265	SLAMF1	FALSE
cg23001457	11	18912859	266	MRGPRX1	TRUE	11:18912484-18912910
cg00799727	X	148604241	266	MAGEA11	FALSE
cg01910481	20	31287729	266	PLUNC	FALSE
cg24304714	1	151045998	267	LCE1C	FALSE
cg14034870	6	31008176	267	SFTPG	FALSE
cg08349806	16	15397405	268	FLJ39599	TRUE	16:15396648-15397719
cg26796283	5	174083940	268	MSX2	TRUE	5:174083930-174085512
cg13885201	16	70053886	268	ZNF23	TRUE	16:70053101-70053892
cg15308737	17	63814923	268	ARSG	FALSE
cg24815853	19	56230228	268	KLK12	FALSE
cg22220722	1	20179228	268	PLA2G2A	FALSE
cg25856811	1	151240581	268	SPRR3	FALSE
cg27626102	7	89678667	269	STEAP2	TRUE	7:89678588-89679531
cg09944526	10	94584181	269	EXOC6	FALSE
cg02868123	2	79236421	269	REGL	FALSE
cg13676215	7	17304501	270	AHR	TRUE	7:17304473-17305753
cg26353877	1	157824510	270	APCS	FALSE
cg03649060	19	11526451	270	ELOF1	FALSE
cg11346450	2	234302782	270	UGT1A3	FALSE
cg13701273	4	66218375	271	EPHA5	TRUE	4:66217490-66218382
cg02228185	17	3326317	271	ASPA	FALSE
cg12274567	1	160648823	271	SH2D1B	FALSE
cg04551925	7	30918265	272	AQP1	TRUE	7:30918039-30918453
cg20731798	11	36572941	272	LOC119710	TRUE	11:36572607-36573172
cg16042149	22	28205947	272	NEFH	TRUE	22:28205749-28207420
cg24134767	11	113350848	272	HTR3A	FALSE
cg10056627	6	43036751	273	GNMT	TRUE	6:43035706-43036927
cg04389838	3	44745855	273	ZNF501	TRUE	3:44745791-44746449
cg01265637	20	2743930	273	C20orf141	FALSE
cg08418332	9	34681001	273	CCL19	FALSE
cg18152830	17	16815854	273	TNFRSF13B	FALSE
cg13216057	11	11987219	274	DKK3	TRUE	11:11986258-11987753
cg16639185	1	204852801	274	LGTN	TRUE	1:204852282-204852995
cg22181664	1	86706913	274	CLCA1	FALSE
cg00371195	11	46697057	274	F2	FALSE
cg23815000	9	137552833	274	LCN1	FALSE
cg19664945	2	53940847	275	GPR75	TRUE	2:53940114-53941112
cg22995176	7	75977406	275	UPK3B	FALSE
cg04740359	12	5473803	276	NTF3	TRUE	12:5473723-5474332
cg24949488	10	98054352	277	DNTT	TRUE	10:98054238-98054478
cg25947945	1	199635569	277	LAD1	TRUE	1:199634832-199635737
cg05322222	11	65815640	277	MGC33486	TRUE	11:65815542-65816574
cg17001430	6	168161125	277	KIF25	FALSE
cg20791593	2	242400469	277	NEU4	FALSE
cg15648315	13	112349637	278	FLJ26443	TRUE	13:112349562-112349890
cg19407886	X	48213231	278	SLC38A5	FALSE
cg19845843	X	18149203	279	CXorf20	TRUE	X:18146563-18149630
cg24505375	8	11226184	279	AMAC1L2	FALSE
cg10054857	18	59967523	279	C18orf20	FALSE
cg10575735	X	48156567	279	SSX4	FALSE
cg00472136	12	55696871	279	TAC3	FALSE
cg02992596	4	155921670	280	MGC27016	TRUE	4:155921599-155922908
cg16792160	10	51678599	280	ASAH2	FALSE
cg12376406	14	20306146	280	FAM12B	FALSE
cg07327347	16	25135505	281	AQP8	FALSE
cg13681935	20	32312113	281	ASIP	FALSE
cg26991292	6	31623070	281	NFKBIL1	FALSE
cg08794763	19	2928843	281	TLE6	FALSE
cg07084746	3	129777337	282	C3orf27	FALSE
cg06799664	17	74078716	283	DNAHL1	TRUE	17:74078474-74078828
cg22171829	7	95063456	283	PDK4	TRUE	7:95063327-95064272
cg14658362	8	30361203	283	RBPMS	TRUE	8:30360792-30362964
cg09227563	19	59676517	283	CDC42EP5	FALSE
cg13968390	2	108271244	283	SULT1C1	FALSE
cg21921474	1	27159768	284	C1orf172	TRUE	1:27158567-27159812
cg27214774	20	48687117	284	C20orf175	FALSE
cg04523589	3	48240150	284	CAMP	FALSE
cg02431964	2	119416499	284	MARCO	FALSE
cg16192029	7	117651910	285	ANKRD7	TRUE	7:117651804-117652144
cg04940435	20	43853698	285	DNTTIP1	TRUE	20:43853272-43854481
cg08124030	3	150577973	285	TM4SF1	TRUE	3:150577836-150578057
cg17813891	14	99601789	285	EVL	FALSE
cg10148841	11	124272665	285	ROBO4	FALSE
cg24440147	9	130504337	286	PKN3	TRUE	9:130504016-130505778
cg11984608	3	191588249	286	CLDN16	FALSE
cg15060813	19	41120148	286	LRFN3	FALSE
cg13062935	11	19039090	286	MRGPRX2	FALSE
cg21489722	X	8961881	287	FAM9B	TRUE	X:8961772-8961973
cg25076881	1	157676460	287	OR10J1	FALSE
cg19850370	4	72423968	287	SLC4A4	FALSE
cg09871315	7	27109207	288	HOXA2	TRUE	7:27108930-27109394
cg22253945	2	105224921	289	GPR45	TRUE	2:105224891-105225678
cg05221264	1	15656100	289	ELA2A	FALSE
cg15149645	16	28458120	289	P8	FALSE
cg13286902	X	100193436	290	CXorf34	TRUE	X:100193151-100193925
cg10287137	11	72606702	290	P2RY2	TRUE	11:72606620-72607619
cg20945531	6	114331705	290	FLJ34503	FALSE
cg20899321	11	76058253	290	LRRC32	FALSE
cg20904010	22	31732393	290	SYN3	FALSE
cg10368842	10	115501494	291	C10orf81	FALSE
cg18870231	1	60311723	291	C1orf87	FALSE
cg23092086	16	54467074	291	CES7	FALSE
cg16937611	14	94117855	291	SERPINA5	FALSE
cg23265096	20	57015989	292	CTSZ	TRUE	20:57015249-57016051
cg20789824	9	126602682	292	OLFML2A	FALSE
cg15779716	3	45163212	294	CDCP1	TRUE	3:45161842-45163260
cg26399113	X	70669364	294	OGT	TRUE	X:70669298-70670748
cg00037763	18	40535761	294	SETBP1	FALSE
cg00806490	16	81218374	295	CDH13	TRUE	16:81217810-81219323
cg22179082	13	26232259	295	GPR12	TRUE	13:26231757-26233351
cg25764191	10	105027205	295	INA	TRUE	10:105026442-105028852
cg21492378	9	122890100	295	CEP1	FALSE
cg01423840	X	150634869	295	FATE1	FALSE
cg00384537	17	36891489	295	KRTHA5	FALSE
cg02537023	7	74225990	295	NCF1	FALSE
cg19856444	10	18281122	295	SLC39A12	FALSE
cg18727700	X	99785586	295	SRPX2	FALSE
cg19226099	20	54257492	296	MC3R	TRUE	20:54257417-54258345
cg08987989	5	114626745	296	PGGT1B	TRUE	5:114625959-114626751
cg15736336	12	18782481	296	PLCZ1	FALSE
cg05331214	2	167052020	296	SCN7A	FALSE
cg16986720	11	84312383	297	DLG2	FALSE
cg08221207	11	124871631	298	FEZ1	TRUE	11:124869760-124871878
cg17790333	15	72447318	298	CYP11A1	FALSE
cg16431978	21	30719803	298	KRTAP13-3	FALSE
cg25152942	19	45972920	298	MIA	FALSE
cg06812844	21	44598210	298	TRPM2	FALSE
cg14547335	3	10466247	299	ATP2B2	TRUE	3:10466013-10466250
cg16627949	14	20596191	299	RNASE8	FALSE
cg01919488	2	71412097	300	ZNF638	TRUE	2:71411771-71413201
cg04409427	21	34657893	300	KCNE2	FALSE
cg26946769	18	46443536	300	MAPK4	FALSE
cg26233253	22	29362613	300	SLC35E4	FALSE
cg09038914	17	40348093	301	GFAP	TRUE	17:40347936-40348194
cg20028470	2	27384333	301	UCN	TRUE	2:27382533-27385080
cg08458170	19	36462316	301	ZNF537	TRUE	19:36462141-36462441
cg20645058	12	10054799	301	CLEC12B	FALSE
cg21209091	8	42354132	301	DKK4	FALSE
cg04086012	4	189297894	302	FLJ36180	TRUE	4:189297883-189298217
cg02882813	20	23808078	302	CST5	FALSE
cg20576002	12	53153920	302	FAM112B	FALSE
cg09421562	17	53712993	302	MPO	FALSE
cg14494313	8	18292733	302	NAT2	FALSE
cg12811135	2	88605587	303	FLJ25369	FALSE
cg01678091	15	21441779	303	MAGEL2	FALSE
cg15586352	19	48382983	303	PSG5	FALSE
cg19481953	X	99785577	304	SRPX2	FALSE
cg03534410	3	12776112	304	TMEM40	FALSE
cg06221259	5	137802370	305	REEP2	TRUE	5:137802353-137803036
cg15782391	19	55985179	305	ACPT	FALSE
cg18787783	12	54523308	306	MMP19	FALSE
cg12554573	3	51951707	306	PARP3	FALSE
cg04950711	X	151057374	307	MAGEA10	TRUE	X:151057178-151057470
cg17412560	2	95327130	307	CSEN	FALSE
cg02818322	X	140754075	307	MAGEC3	FALSE
cg24919972	3	46012612	308	FYCO1	TRUE	3:46011871-46012674
cg14269477	7	142340719	308	TRPV5	FALSE
cg07654843	22	24468429	309	MYO18B	TRUE	22:24468015-24468522
cg03945021	16	24589575	309	FLJ45256	FALSE
cg21970438	6	167658267	309	TTLL2	FALSE
cg06190053	9	70161945	310	PGM5	TRUE	9:70161177-70162614
cg15711744	12	47152405	310	ANP32D	FALSE
cg19971655	1	55237515	310	BSND	FALSE
cg01124420	2	108971950	310	EDAR	FALSE
cg02130905	8	27172130	310	STMN4	FALSE
cg13675849	7	142341337	310	TRPV5	FALSE
cg19403023	16	2788798	311	TESSP1	TRUE	16:2788298-2789206
cg21964481	9	139245517	311	SLC34A3	FALSE
cg18058949	1	227711023	312	NUP133	TRUE	1:227710240-227711077
cg23370883	7	44147129	312	MYL7	FALSE
cg00756887	1	159326278	312	PVRL4	FALSE
cg17500329	8	141012285	313	C8orf17	TRUE	8:141012091-141012316
cg09498007	2	101370802	313	CREG2	TRUE	2:101369552-101370808
cg10938286	20	23754999	313	CST2	FALSE
cg11933267	1	20338719	313	PLA2G2F	FALSE
cg05318777	4	123011406	314	BBS7	TRUE	4:123010093-123011434
cg18839416	1	12728436	314	C1orf158	FALSE
cg17788013	5	147423445	314	SPINK5	FALSE
cg13998293	1	26267022	314	TRIM63	FALSE
cg03705396	3	185026374	315	MAP6D1	TRUE	3:185025099-185026684
cg02994956	22	28206534	315	NEFH	TRUE	22:28205749-28207420
cg08697665	3	159933284	315	RARRES1	TRUE	3:159932031-159933437
cg03742272	17	7931430	316	ALOX12B	FALSE
cg09674867	11	8910782	316	C11orf16	FALSE
cg07826255	17	45598706	316	SGCA	FALSE
cg27081230	16	49273030	316	SLIC1	FALSE
cg10412312	12	25597128	317	FLJ36004	FALSE
cg17095797	16	85169514	317	FOXL1	FALSE
cg05663262	1	43702866	317	HYI	FALSE
cg27299588	19	5237082	317	PTPRS	FALSE
cg03406535	1	9979544	317	RBP7	FALSE
cg10207745	12	13421230	318	C12orf36	FALSE
cg27000831	17	29669861	318	CCL8	FALSE
cg10779183	1	22201054	318	ELA3A	FALSE
cg08583049	15	58084107	320	FOXB1	TRUE	15:58083184-58086207
cg07879977	16	3194568	320	OR1F1	FALSE
cg27388462	6	31246112	320	POU5F1	FALSE
cg22285621	11	66827898	321	SSH3	TRUE	11:66826951-66828421
cg17105014	2	127129833	321	GYPC	FALSE
cg27404050	19	40995720	321	PRODH2	FALSE
cg10305797	19	40673517	321	UNQ467	FALSE
cg12954718	17	4972090	321	USP6	FALSE
cg25957124	16	21078585	322	DNAH3	TRUE	16:21078406-21078638
cg03103192	4	52612028	322	SPATA18	TRUE	4:52612015-52613199
cg05997860	14	69993648	322	ADAM21	FALSE
cg20557104	19	46626153	322	B3GALT7	FALSE
cg13407883	19	56319655	322	SIGLEC9	FALSE
cg16254309	7	145445085	323	CNTNAP2	TRUE	7:145443587-145445242
cg09407859	16	65552962	323	FLJ21736	TRUE	16:65552872-65553073
cg19491035	12	12394113	323	MANSC1	TRUE	12:12394060-12394847
cg04595021	21	45541263	323	C21orf86	FALSE
cg13553498	12	9713253	323	CLEC2D	FALSE
cg19420968	1	31857551	323	HCRTR1	FALSE
cg06948937	1	203740027	323	PCTK3	FALSE
cg17264618	3	40404018	324	ENTPD3	TRUE	3:40403461-40404047
cg21230133	17	36807046	324	KRTHA1	TRUE	17:36807010-36807222
cg04431054	5	126880923	324	LOC133619	TRUE	5:126880890-126881840
cg15005385	17	31650167	324	CCL3L1	FALSE
cg14036856	1	43524150	324	MGC52423	FALSE
cg08849574	19	62817765	325	ZNF134	TRUE	19:62817155-62817951
cg16222568	2	220016315	325	APEG1	FALSE
cg18557145	9	35608083	325	CD72	FALSE
cg15560337	7	123272134	325	HYAL4	FALSE
cg23674788	17	36876839	325	KRTHA2	FALSE
cg02905245	3	113842342	325	URB	FALSE
cg19162158	8	32524969	326	NRG1	TRUE	8:32524620-32526592
cg08649013	4	9651296	326	SLC2A9	FALSE
cg04415689	2	241776923	326	TMEM16G	FALSE
cg08145625	4	118225853	327	TRAM1L1	TRUE	4:118225823-118226399
cg11277126	20	33144606	327	TRPC4AP	TRUE	20:33143574-33144850
cg14324838	20	34164089	327	EPB41L1	FALSE
cg07403255	2	113752640	328	PAX8	TRUE	2:113750661-113752664
cg09868882	7	126670876	328	GRM8	FALSE
cg27050793	19	40710765	328	SBSN	FALSE
cg25737664	20	1486671	328	SIRPD	FALSE
cg04616566	15	69807614	328	THSD4	FALSE
cg07664183	9	19093231	329	FAM29A	TRUE	9:19092346-19094467
cg12473775	11	66581226	329	RHOD	TRUE	11:66580635-66581321
cg12604192	1	110863650	330	KCNA10	FALSE
cg08458487	10	81699171	330	SFTPD	FALSE
cg21697134	17	78287128	331	FN3K	TRUE	17:78285772-78287131
cg09347151	X	134383206	331	MGC39606	TRUE	X:134383127-134384321
cg18084114	1	30969805	331	MATN1	FALSE
cg07531356	9	5175951	333	INSL6	TRUE	9:5175191-5175954
cg04929865	X	152413272	333	BGN	FALSE
cg22083047	3	64186504	333	PRICKLE2	FALSE
cg24269657	13	112807772	334	F7	FALSE
cg13928961	12	51298276	334	K6IRS3	FALSE
cg14679202	22	39930924	335	L3MBTL2	TRUE	22:39930321-39931565
cg07693270	3	188339622	335	RPL39L	TRUE	3:188339213-188340495
cg05358291	19	15870219	335	CYP4F2	FALSE
cg27305303	2	26634735	335	OTOF	FALSE
cg07080358	2	68400011	336	C2orf32	TRUE	2:68399390-68400827
cg15802898	9	99655022	336	FOXE1	TRUE	9:99653657-99657482
cg15928132	4	26101476	336	CCKAR	FALSE
cg21770617	3	58627937	336	FAM3D	FALSE
cg21716693	6	36914860	338	CPNE5	TRUE	6:36914773-36916564
cg00420929	19	18312112	338	PGPEP1	TRUE	19:18312043-18312793
cg02016419	17	15185962	338	TEKT3	TRUE	17:15185000-15186014
cg26770882	17	6278905	338	AIPL1	FALSE
cg15210427	20	23496991	338	CST9L	FALSE
cg19025034	19	53890712	338	FUT2	FALSE
cg21663722	20	25982952	339	C20orf91	FALSE
cg03273615	X	106249029	339	FLJ11016	FALSE
cg05730092	14	100106223	339	KIAA1446	FALSE
cg23013864	6	17501375	340	CAP2	FALSE
cg19238840	16	20246676	340	GP2	FALSE
cg26838900	3	195571421	340	LRRC15	FALSE
cg07342901	11	1975300	341	H19	FALSE
cg19133618	9	21998970	342	CDKN2B	TRUE	9:21998555-21999615
cg15700197	1	157675831	342	OR10J1	FALSE
cg25661884	19	9985267	342	RDH8	FALSE
cg19042947	14	94097194	342	SERPINA4	FALSE
cg14930674	15	46287532	342	SLC12A1	FALSE
cg21115977	10	48036516	343	GDF2	TRUE	10:48036256-48036536
cg09947274	2	27293419	343	CAD	FALSE
cg07296772	14	23753368	343	CHMP4A	FALSE
cg21750887	8	68820791	343	CPA6	FALSE
cg17833578	10	85991540	343	LRRC21	FALSE
cg26354398	9	115263857	343	RGS3	FALSE
cg14087150	17	36570165	344	KRTAP4-4	FALSE
cg05508084	19	61680210	345	ZNF667	TRUE	19:61679899-61681705
cg19812619	12	51886921	346	ITGB7	FALSE
cg14321743	1	20318249	346	PLA2G2D	FALSE
cg13571802	3	44891477	346	TGM4	FALSE
cg26349773	7	138133813	347	ATP6V0A4	FALSE
cg16592658	19	4180887	347	EBI3	FALSE
cg12626411	1	184532388	347	PRG4	FALSE
cg19686152	15	49908834	347	TMOD3	FALSE
cg16352283	1	27211565	349	FAM46B	TRUE	1:27211333-27212200
cg27588902	6	43036129	349	GNMT	TRUE	6:43035706-43036927
cg13668129	19	46459915	349	HNRPUL1	TRUE	19:46459893-46463152
cg23855121	4	38461333	349	TLR10	TRUE	4:38461308-38461511
cg08402568	16	69238318	349	MGC34647	FALSE
cg11821702	9	5881258	349	MLANA	FALSE
cg09144786	X	117363720	350	WDR44	TRUE	X:117363449-117364996
cg12439773	11	62508695	350	SLC22A6	FALSE
cg13797282	22	36244805	351	CARD10	TRUE	22:36244679-36245921
cg05671350	11	73699996	351	P4HA3	TRUE	11:73699933-73700730
cg03221619	19	7673348	351	FCER2	FALSE
cg25061755	2	48661618	351	STON1	FALSE
cg10198932	21	42009356	352	C21orf129	FALSE
cg06277277	1	159474931	352	NR1I3	FALSE
cg13625403	11	119513720	353	TRIM29	TRUE	11:119513136-119513923
cg23355492	17	43288592	353	SP6	FALSE
cg11481351	1	109066910	354	FNDC7	FALSE
cg09882647	20	43424760	355	C20orf35	TRUE	20:43424415-43425889
cg25882366	17	43977036	355	HOXB2	TRUE	17:43976727-43977325
cg15485859	1	205273070	355	C1orf116	FALSE
cg09027725	20	29689707	355	COX4I2	FALSE
cg17255302	12	51114728	355	K6HF	FALSE
cg01868128	1	150750299	355	LCE5A	FALSE
cg26292028	12	108363111	356	FLJ37587	FALSE
cg13097816	2	241217112	356	GPR35	FALSE
cg08860143	16	30293268	356	MYLPF	FALSE
cg19382175	5	149304905	356	PDE6A	FALSE
cg12111714	13	24941472	357	ATP8A2	TRUE	13:24940557-24941659
cg12588301	1	150753959	357	C1orf42	FALSE
cg16879596	7	99115914	357	CYP3A5	FALSE
cg26776077	9	65233711	357	FLJ45202	FALSE
cg17103109	6	32893119	357	HLA-DOB	FALSE
cg04289385	6	36463803	358	ETV7	TRUE	6:36462816-36464072
cg19125606	1	228916922	358	AGT	FALSE
cg02903525	19	52505329	358	C5AR1	FALSE
cg18515587	1	149611430	358	SELENBP1	FALSE
cg22074467	10	5050566	359	AKR1C2	FALSE
cg13968061	1	157823881	359	APCS	FALSE
cg13125510	11	130047701	360	C11orf44	FALSE
cg14942312	X	129346742	360	GPR119	FALSE
cg23110514	1	150805512	360	LCE3E	FALSE
cg05467458	19	38052872	360	SLC7A9	FALSE
cg19290962	20	2465613	360	TMC2	FALSE
cg06851207	19	51666978	361	FLJ10781	TRUE	19:51666325-51667046
cg25802093	10	22674044	361	SPAG6	TRUE	10:22673932-22675060
cg20305726	20	71613	361	DEFB126	FALSE
cg25229305	10	118946629	361	KCNK18	FALSE
cg15703357	2	96535176	361	LINCR	FALSE
cg13446622	12	55614673	361	SDR-O	FALSE
cg23653187	22	42650590	362	ADPN	TRUE	22:42650559-42652185
cg21111471	11	63627576	362	FLRT1	FALSE
cg06374075	17	40192457	363	ADAM11	TRUE	17:40191182-40192471
cg22627427	11	61279074	363	C11orf9	FALSE
cg17709873	6	31648435	363	LTA	FALSE
cg17073891	X	133620542	363	PLAC1	FALSE
cg15756091	1	180686278	363	RGSL2	FALSE
cg15113803	3	130729809	363	RHO	FALSE
cg14289985	19	61710660	364	ZNF471	TRUE	19:61710502-61711930
cg13553455	10	105835992	364	COL17A1	FALSE
cg01753375	2	74461108	364	DCTN1	FALSE
cg24939733	11	85075332	364	FLJ38159	FALSE
cg01469547	11	7803731	364	OR5P3	FALSE
cg19560758	1	8009308	365	ERRFI1	TRUE	1:8008041-8009751
cg12080675	5	179267829	365	KIAA0676	TRUE	5:179266772-179268149
cg14774175	X	30158839	365	MAGEB3	FALSE
cg14587868	14	23802577	365	TGM1	FALSE
cg08603768	5	137447943	365	WNT8A	FALSE
cg07270175	10	96113039	366	NOC3L	TRUE	10:96112298-96113051
cg03014957	20	29419723	366	DEFB118	FALSE
cg22951794	11	6823856	366	OR10A5	FALSE
cg03098643	4	187881614	367	FAT	TRUE	4:187881199-187883139
cg06545504	4	70950381	367	HTN1	FALSE
cg08508325	11	3035615	368	CARS	TRUE	11:3034646-3035644
cg02946850	7	126670180	368	GRM8	TRUE	7:126670007-126670217
cg03454353	9	114859185	368	ZFP37	TRUE	9:114858290-114859224
cg14894216	11	65550928	368	CATSPER1	FALSE
cg17983307	1	199448025	368	DKFZp434B1231	FALSE
cg20008332	2	5750620	370	SOX11	TRUE	2:5748447-5751811
cg07566050	1	158441379	370	PEA15	FALSE
cg25023829	21	43809919	371	H2BFS	TRUE	21:43809403-43810034
cg01643624	11	8911469	371	C11orf16	FALSE
cg13445249	18	27211109	371	DSG4	FALSE
cg25843439	19	15713574	371	OR10H3	FALSE
cg04505023	1	151222810	371	SPRR1A	FALSE
cg19642007	11	1901040	371	TNNT3	FALSE
cg21022247	12	50004577	372	BIN2	TRUE	12:50003835-50005015
cg07675169	20	61356707	372	C20orf58	TRUE	20:61355043-61356850
cg21960110	16	142482	372	HBZ	FALSE
cg15669228	9	21399505	372	IFNA8	FALSE
cg16799087	16	88655862	372	PRDM7	FALSE
cg04765422	3	8979773	373	RAD18	TRUE	3:8979716-8980449
cg20264732	16	66827264	373	RBM35B	TRUE	16:66826447-66827890
cg23163573	2	108271900	373	SULT1C1	FALSE
cg12232274	6	150227547	374	LRP11	TRUE	6:150225936-150227697
cg13765785	11	123030148	374	SCN3B	TRUE	11:123029666-123031070
cg06259570	11	102081304	374	MMP27	FALSE
cg07841014	2	79168253	374	REG1B	FALSE
cg23695504	1	245341967	375	FLJ45717	TRUE	1:245340797-245342416
cg18354264	1	224477631	375	MIXL1	TRUE	1:224477495-224478686
cg05215575	16	4778723	375	FLJ25410	FALSE
cg07440877	13	23421079	375	FLJ46358	FALSE
cg18153060	12	51066060	376	KRTHB4	FALSE
cg24928161	17	7473840	376	SHBG	FALSE
cg04138756	1	151240473	376	SPRR3	FALSE
cg14419187	2	210345339	377	C2orf21	TRUE	2:210344445-210345400
cg17918501	2	27571213	377	FNDC4	TRUE	2:27571066-27571970
cg27022827	19	3679751	377	TJP3	TRUE	19:3679609-3680010
cg11308639	2	68951776	377	BMP10	FALSE
cg22830895	7	150768409	377	CRYGN	FALSE
cg08843314	X	70754715	377	CXCR3	FALSE
cg14059963	12	12706293	378	GPR19	TRUE	12:12706085-12706362
cg16302441	2	25245334	378	POMC	TRUE	2:25243726-25245503
cg12204574	X	150893428	379	GABRE	TRUE	X:150893205-150894382
cg04123507	12	50981537	379	KRTHB6	TRUE	12:50981438-50982407
cg11027330	16	704795	379	METRN	TRUE	16:704679-706133
cg21907579	12	113330251	379	TBX5	TRUE	12:113330117-113332137
cg14706739	8	21972301	379	EPB49	FALSE
cg25310567	7	151284823	379	GALNTL5	FALSE
cg01602596	17	36997052	379	KRT14	FALSE
cg26656452	10	115303155	380	HABP2	FALSE
cg14992253	1	32460154	381	C1orf91	TRUE	1:32460114-32461366
cg11594137	9	90795801	381	EDG3	TRUE	9:90794956-90796827
cg24924779	20	49073405	381	KCNG1	TRUE	20:49072343-49074019
cg04201347	19	54778661	381	PRRG2	FALSE
cg21707816	3	38512455	382	ENDOGL1	TRUE	3:38512323-38513389
cg15250797	2	119997996	382	SCTR	TRUE	2:119997791-119998904
cg03914397	5	151764634	383	NMUR2	TRUE	5:151764215-151764644
cg12348970	9	19776543	383	SLC24A2	FALSE
cg18524091	1	19058359	383	TAS1R2	FALSE
cg10052840	19	4509119	384	SEMA6B	TRUE	19:4508934-4509159
cg14221171	7	97199695	384	TAC1	TRUE	7:97198913-97199722
cg00918005	2	79106718	384	REG3G	FALSE
cg18956481	20	52223546	385	CYP24A1	TRUE	20:52222583-52223813
cg00601486	12	47009415	385	H1T2	TRUE	12:47009414-47010208
cg25242557	11	31789840	385	PAX6	TRUE	11:31789223-31789894
cg08361238	1	117253827	385	PTGFRN	TRUE	1:117253545-117255169
cg08947964	6	90660524	385	CX62	FALSE
cg03386373	2	231568700	385	SPATA3	FALSE
cg10190509	17	31332250	386	CCL16	FALSE
cg01476044	7	141341762	386	MGAM	FALSE
cg15518883	9	35640561	386	SIT1	FALSE
cg08030082	2	25245343	387	POMC	TRUE	2:25243726-25245503
cg15640375	19	772565	387	PRG2	TRUE	19:772219-774095
cg08612871	1	34992921	387	GJB5	FALSE
cg05731779	5	72499443	387	MGC13034	FALSE
cg21198021	1	33614168	387	PHC2	FALSE
cg04545516	20	43269475	387	SEMG1	FALSE
cg03898365	11	6854067	388	OR10A4	FALSE
cg11761535	3	150533721	388	TM4SF18	FALSE
cg07974303	8	6771397	389	DEFA6	FALSE
cg03608577	6	29450658	389	OR12D3	FALSE
cg07028533	7	145444372	390	CNTNAP2	TRUE	7:145443587-145445242
cg19945840	1	1157899	391	B3GALT6	TRUE	1:1156312-1159510
cg18790143	2	240729137	391	OTOS	TRUE	2:240728933-240729160
cg01472101	17	6924715	391	CLEC10A	FALSE
cg22506453	17	36376279	391	KA35	FALSE
cg03520136	2	158559546	391	UPP2	FALSE
cg01999333	19	15023623	392	CASP14	FALSE
cg09390792	11	44838020	392	TSPAN18	FALSE
cg10290730	X	152454381	393	ATP2B3	FALSE
cg20624391	6	105690842	394	BVES	TRUE	6:105690697-105692470
cg12087643	10	118023360	394	GFRA1	TRUE	10:118020244-118024333
cg27342801	2	79240781	394	REG3A	FALSE
cg18008766	2	38832400	395	SFRS7	TRUE	2:38830946-38832545
cg17922226	7	142723736	395	CLCN1	FALSE
cg13523557	7	45580250	396	ADCY1	TRUE	7:45579547-45582131
cg06811800	13	113360106	396	ATP4B	TRUE	13:113359799-113360176
cg04650786	6	108502238	396	OSTM1	TRUE	6:108502055-108503715
cg13282594	1	154478233	396	BGLAP	FALSE
cg04014889	15	21441686	396	MAGEL2	FALSE
cg13705284	3	58498353	397	ACOX2	FALSE
cg11070419	1	205343833	397	C4BPA	FALSE
cg00659129	8	131483796	397	DDEF1	FALSE
cg22967016	11	12088315	399	MICAL2	TRUE	11:12088256-12089631
cg14102807	16	28851178	399	CD19	FALSE
cg25041439	11	125258320	399	HYLS1	FALSE
cg22937804	2	27215383	399	MGC44505	FALSE
cg20131596	5	102229027	399	PAM	FALSE
cg00969446	7	961192	400	CENTA1	TRUE	7:959794-961282
cg10423860	20	23808781	401	CST5	FALSE
cg11267879	19	46311792	401	CYP2F1	FALSE
cg16953612	3	129668380	401	DNAJB8	FALSE
cg23851011	1	151852539	401	S100A16	FALSE
cg21229055	X	13867154	402	GPM6B	TRUE	X:13865701-13867179
cg06241300	6	31731248	402	APOM	FALSE
cg10705800	1	41101007	402	CITED4	FALSE
cg22189286	12	118100576	402	HSPB8	FALSE
cg10241097	1	110456183	402	UBL4B	FALSE
cg15959756	2	32142587	403	SPAST	TRUE	2:32141551-32143074
cg07880854	2	112612030	403	FLJ37440	FALSE
cg03665605	7	98902148	404	ATP5J2	TRUE	7:98901645-98903300
cg14401837	7	34664018	404	GPR154	FALSE
cg15642035	8	139234234	405	C8ORFK32	FALSE
cg20281815	8	143758510	405	PSCA	FALSE
cg22937320	9	19022778	406	C9orf138	TRUE	9:19022551-19022907
cg15873301	3	12020459	406	SYN2	TRUE	3:12020118-12021768
cg12958813	1	196776292	406	ATP6V1G3	FALSE
cg04450876	12	53153212	406	FAM112B	FALSE
cg19937039	14	93829520	406	SERPINA10	FALSE
cg11474811	11	2400445	406	TRPM5	FALSE
cg09722555	9	34652282	407	CCL27	FALSE
cg09260089	10	134449850	408	NKX6-2	TRUE	10:134447362-134452718
cg22194129	12	7792928	408	CLEC4C	FALSE
cg19465374	7	99411214	409	AZGP1	FALSE
cg11258532	16	65435374	409	CA7	FALSE
cg00347729	11	102156963	409	MMP10	FALSE
cg16462075	7	100382156	409	MUC3B	FALSE
cg03842617	7	150319489	409	NOS3	FALSE
cg10876928	20	43410887	409	SDC4	FALSE
cg16853982	1	234916012	410	ACTN2	TRUE	1:234915582-234917127
cg22789545	20	31335013	411	C20orf114	FALSE
cg05225996	16	3103018	411	ZNF205	FALSE
cg15582789	9	98185346	412	SLC35D2	TRUE	9:98185223-98186088
cg11237738	4	5578196	412	C4orf6	FALSE
cg07039362	16	54466371	412	CES7	FALSE
cg20450764	X	38305270	413	TSPAN7	TRUE	X:38305247-38306580
cg23382741	15	38908612	413	PPP1R14D	FALSE
cg23749046	1	109884447	415	GPR61	FALSE
cg20022122	2	27573626	416	GCKR	FALSE
cg19859270	3	99733984	416	GPR15	FALSE
cg01808508	3	63984576	416	PSMD6	FALSE
cg02706575	17	29707167	417	CCL13	FALSE
cg05181279	11	11939370	417	RIG	FALSE
cg07326586	6	29636098	417	UBD	FALSE
cg15796819	17	19591782	418	ALDH3A1	FALSE
cg09033997	3	45902605	418	CCR9	FALSE
cg27446185	1	117555488	418	VTCN1	FALSE
cg01897036	2	119998797	419	SCTR	TRUE	2:119997791-119998904
cg20530056	1	204710000	419	IKBKE	FALSE
cg10376763	2	217432608	419	TNP1	FALSE
cg22189019	19	591346	420	FGF22	TRUE	19:590091-591404
cg18023724	4	164307943	420	LOC92345	TRUE	4:164306691-164308033
cg20691580	11	116206254	420	APOC3	FALSE
cg18286698	9	73953693	420	GDA	FALSE
cg11235426	6	237522	421	DUSP22	TRUE	6:236809-238025
cg15875314	5	55070954	421	DDX4	FALSE
cg07364841	4	3413945	421	HGFAC	FALSE
cg01853981	12	51232749	421	KRT6IRS	FALSE
cg09030119	19	49597183	422	ZNF285	TRUE	19:49597112-49597803
cg22647018	1	228916142	422	AGT	FALSE
cg10620457	1	57204698	422	C8B	FALSE
cg17267907	8	6825434	422	DEFA1	FALSE
cg04384208	1	159786020	422	FCGR3A	FALSE
cg18959422	1	201411987	422	MYBPH	FALSE
cg02833180	2	198523309	422	PLCL1	FALSE
cg05985767	15	88150515	423	ANPEP	TRUE	15:88150397-88150795
cg26832142	1	66031029	423	PDE4B	TRUE	1:66030397-66031906
cg16128363	18	3870558	423	DLGAP1	FALSE
cg18988395	9	4142606	423	GLIS3	FALSE
cg07830847	1	110862897	423	KCNA10	FALSE
cg06338119	X	109548518	423	RGAG1	FALSE
cg19986872	5	131375672	424	ACSL6	TRUE	5:131374645-131375803
cg27076139	7	31058243	424	ADCYAP1R1	TRUE	7:31058165-31059618
cg17704839	19	9800038	424	UBL5	TRUE	19:9798548-9800346
cg06268694	22	45311306	425	CELSR1	TRUE	22:45307876-45313678
cg00333528	6	89984204	425	GABRR1	FALSE
cg19561186	3	110155735	425	GUCA1C	FALSE
cg03221436	X	48803035	425	JM11	FALSE
cg14948822	2	27398510	425	MPV17	FALSE
cg16547529	11	74818329	426	FLJ33790	TRUE	11:74818131-74820083
cg23753610	17	74079425	426	DNAHL1	FALSE
cg18219226	7	65085057	426	GUSB	FALSE
cg04081402	22	29333587	426	TCN2	FALSE
cg09259772	7	12692614	427	ARL4	TRUE	7:12692517-12693939
cg16743289	1	173234767	427	CACYBP	TRUE	1:173234625-173236389
cg27040030	16	265185	427	PDIA2	TRUE	16:264831-266235
cg01892689	8	97726248	427	PGCP	TRUE	8:97726093-97727293
cg14168975	X	55074563	427	ALAS2	FALSE
cg11128808	19	59187782	428	CACNG6	TRUE	19:59187727-59188484
cg12613344	11	47236881	428	NR1H3	FALSE
cg16139316	1	151597382	428	S100A9	FALSE
cg16673198	3	133236963	429	CPNE4	TRUE	3:133236061-133236984
cg06862644	17	3322219	429	SPATA22	TRUE	17:3321498-3322570
cg20500126	17	3661007	429	ITGAE	FALSE
cg16812893	21	30734946	429	KRTAP15-1	FALSE
cg11710560	17	36642670	429	KRTAP9-3	FALSE
cg27257987	19	48401200	430	PSG4	FALSE
cg18389810	14	20568727	431	C14orf8	TRUE	14:20568722-20568923
cg22925639	2	175336985	431	CHRNA1	FALSE
cg06200697	11	57285414	431	CTNND1	FALSE
cg04058169	10	124903428	432	BUB3	TRUE	10:124903424-124904818
cg18411891	11	86343648	433	FZD4	TRUE	11:86343442-86345087
cg20540428	3	73128376	433	PPP4R2	TRUE	3:73127804-73129468
cg16358738	2	241457268	433	AGXT	FALSE
cg25890048	11	55460019	433	OR5I1	FALSE
cg25943276	11	131038494	434	C11orf39	TRUE	11:131038328-131038553
cg15310162	21	36774692	434	CLDN14	FALSE
cg05569220	17	76753468	434	FLJ44861	FALSE
cg18838701	19	60360424	434	TNNI3	FALSE
cg05976074	19	38408113	435	SLC7A10	TRUE	19:38408044-38408719
cg27377450	19	7352301	435	ARHGEF18	FALSE
cg25007250	7	150318645	435	NOS3	FALSE
cg26159905	7	150515847	436	ASB10	FALSE
cg21846903	17	23721408	436	VTN	FALSE
cg03860890	7	55053782	437	EGFR	TRUE	7:55053462-55055739
cg19717150	20	42418292	437	HNF4A	TRUE	20:42418188-42418589
cg07434382	16	68541873	438	LOC348174	TRUE	16:68541746-68541976
cg24355048	14	24114868	438	CTSG	FALSE
cg04784315	9	124837105	438	GPR21	FALSE
cg01001286	15	79262693	438	IL16	FALSE
cg26759925	2	113452515	438	IL1F9	FALSE
cg11976616	5	41248929	440	C6	FALSE
cg18979491	20	36407859	440	LBP	FALSE
cg20579480	1	181888630	441	APOBEC4	FALSE
cg11297236	16	20323976	442	PDILT	FALSE
cg14284171	X	48155845	443	SSX4	TRUE	X:48155679-48156480
cg13364756	7	99263129	443	CYP3A43	FALSE
cg03548857	19	40632014	443	FFAR2	FALSE
cg06784466	19	56989780	443	FPRL2	FALSE
cg01909245	11	1830333	443	LSP1	FALSE
cg14615807	1	55236761	444	BSND	FALSE
cg22975712	22	36548891	444	GALR3	FALSE
cg22899145	X	153063378	444	OPN1LW	FALSE
cg26323655	8	95517861	447	FSBP	FALSE
cg01507173	2	113533133	447	IL1F5	FALSE
cg09607232	X	148670955	447	MAGEA9	FALSE
cg06179485	1	33139988	448	TMEM54	TRUE	1:33139063-33140371
cg10910525	19	54350044	449	HRC	FALSE
cg26825412	20	62151872	449	SOX18	FALSE
cg15839448	8	41285687	450	SFRP1	TRUE	8:41284820-41286784
cg04968473	15	72827787	450	CYP1A2	FALSE
cg21890738	17	58877003	451	CYB561	TRUE	17:58876701-58878285
cg27495908	9	89688043	451	C9orf79	FALSE
cg05949660	6	109884335	452	MICAL1	TRUE	6:109882585-109884615
cg25569462	4	189263854	452	FLJ25801	FALSE
cg13338132	12	98566115	453	FAM71C	TRUE	12:98566088-98566372
cg07074571	6	161615551	454	AGPAT4	TRUE	6:161615380-161615582
cg05587158	X	69404473	454	ARR3	FALSE
cg02756698	17	36276534	454	KRT12	FALSE
cg10217445	21	33319654	455	OLIG2	TRUE	21:33316613-33322726
cg03752087	19	15024470	455	CASP14	FALSE
cg10322876	19	46188589	455	CYP2B6	FALSE
cg00433406	1	20489562	455	FLJ32784	FALSE
cg09230173	9	70161179	456	PGM5	TRUE	9:70161177-70162614
cg07455279	19	59297515	457	NDUFA3	TRUE	19:59296606-59298627
cg09816471	16	11669361	457	SNN	TRUE	16:11669120-11670901
cg15227610	11	111287226	457	CRYAB	FALSE
cg13474734	15	38418083	457	FLJ43339	FALSE
cg12513379	19	15699397	457	OR10H2	FALSE
cg02238504	16	48418876	457	ZNF423	FALSE
cg16454349	16	4777890	458	FLJ25410	FALSE
cg01240931	5	112101942	459	APC	FALSE
cg04797496	5	141319270	459	PCDH12	FALSE
cg11151665	19	48113424	459	PSG6	FALSE
cg12312863	16	2509968	460	AMDHD2	TRUE	16:2509465-2511104
cg00134787	17	10360224	460	MYH1	FALSE
cg09395732	3	10832456	461	SLC6A11	TRUE	3:10832452-10833630
cg26845300	6	158163821	461	SNX9	TRUE	6:158163446-158165173
cg20074593	2	128119756	461	GPR17	FALSE
cg26851374	1	57204738	462	C8B	FALSE
cg00174500	14	22916319	462	CMTM5	FALSE
cg03190825	19	15906788	462	CYP4F11	FALSE
cg01869233	20	5983139	463	C20orf75	FALSE
cg11504739	11	61942636	463	SCGB1A1	FALSE
cg24489034	X	148485237	464	LW-1	TRUE	X:148485220-148485443
cg02049180	1	155094826	464	INSRR	FALSE
cg16449972	16	48418883	464	ZNF423	FALSE
cg06509940	3	120761604	465	CD80	FALSE
cg17683775	9	131555630	465	PTGES	FALSE
cg25477904	19	48075245	466	PSG1	FALSE
cg06434451	1	32574878	468	MARCKSL1	TRUE	1:32573266-32574965
cg02164442	16	31312602	468	ITGAD	FALSE
cg19308222	4	75449255	469	EREG	TRUE	4:75449212-75449419
cg03731616	3	125086308	469	MYLK	TRUE	3:125085102-125086419
cg06194808	7	1562743	470	MGC9712	FALSE
cg26851800	5	147529019	470	SPINK5L2	FALSE
cg04893119	8	75898856	471	PI15	FALSE
cg25093045	4	6041539	472	FLJ46481	TRUE	4:6041328-6041558
cg17307280	5	174804242	473	DRD1	TRUE	5:174803106-174805076
cg11391732	5	53787676	474	HSPB3	TRUE	5:53787529-53787747
cg25463779	12	123339189	474	FAM101A	FALSE
cg05365670	5	1577551	475	AYTL2	TRUE	5:1575966-1577980
cg07940804	X	127013583	475	ACTRT1	FALSE
cg05330360	17	35277519	476	ZPBP2	TRUE	17:35277407-35278715
cg10157098	7	128142203	476	NYD-SP18	FALSE
cg08480367	X	37965552	477	SRPX	TRUE	X:37964484-37965650
cg05921699	19	47072565	477	CD79A	FALSE
cg08475088	19	60941103	477	NALP9	FALSE
cg24363955	5	32824224	478	FLJ14054	FALSE
cg16483466	20	31134895	479	C20orf186	TRUE	20:31134869-31135091
cg06738602	14	51850384	479	PTGER2	TRUE	14:51850265-51852038
cg00498305	10	118990226	480	SLC18A2	TRUE	10:118990170-118991650
cg05535113	16	70117080	480	CHST4	FALSE
cg03440846	20	32926021	481	ACSS2	FALSE
cg01684579	5	175749440	481	HSPC111	FALSE
cg11384427	12	6423846	481	TNFRSF7	FALSE
cg19241311	20	29492554	482	DEFB123	FALSE
cg03343942	12	54911376	482	SLC39A5	FALSE
cg00729708	15	98901965	483	LASS3	TRUE	15:98901825-98902776
cg05554718	6	26343678	483	HIST1H1D	FALSE
cg14173523	19	5822035	484	FUT5	FALSE
[truncated: 1,082 more rows]
