# Supplementary material for: Phenotypic Subtyping and Re-Analysis of Existing Methylation Data from Autistic Probands in Simplex Families Reveal ASD Subtype-Associated Differentially Methylated Genes and Biological Functions
Source: Int J Mol Sci. 2020 Sep 19;21(18):6877. doi: 10.3390/ijms21186877 (PMC7555936; doi:10.3390/ijms21186877)
Supplement: Supplementary file 1 [file ijms-21-06877-s001.zip › ijms-927106-supplementary/Suppl. Materials_revised MS/Table S6. Over-represented neurological and developmental disorders_all groups.xlsx]

## Sheet: Sheet1
Neurological Diseases	p-value*	Genes
Severely language impaired
Cognitive impairment	1.32e-05	ABCA4,BCAP31,BCORL1,CD36,CRMP1,EPB41L1,FMR1,GRM4,GSTM1,INS,KCNQ1,LRRN4,NEFL,NOS3,NPTX2,PAX6,PDZK1,PHF8,PLAT,POLR3C,SHANK1,SLC1A7,SLC9A6,TFAP2A,UBE2A,UHMK1
Syndromic X-linked mental retardation	0.000299	BCAP31,FMR1,PHF8,SLC1A7,SLC9A6,UBE2A
Mental retardation	0.00413	ABCA4,BCAP31,BCORL1,EPB41L1,FMR1,PAX6,PDZK1,PHF8,POLR3C,SLC1A7,SLC9A6,TFAP2A,UBE2A,UHMK1
Motor dysfunction or movement disorder	0.00775	ARMCX2,ATP2B2,ATP2B3,BCAP31,C9,CCL11,CETN2,CHRNG,COL6A3,ECRG4,F8A1,FCGR3A/FCGR3B,FMR1,KCNQ1,MYH7,NEFL,NHLH2,NPTX2,PAX6,PLA2G2E,PVALB,RGS9,SDC4,SGCG,SLC17A4,SLC1A7,SLC9A6,TGM6,THY1
Autosomal dominant mental retardation type 11	0.00994	EPB41L1
Intermediate
Schizophrenia	0.000773	ADRA1B,APOA4,ATP2B2,ATP4B,CA5A,CYP2E1,DDR1,GABRA3,HRH2,KCNQ1,MAGEC1,NEFL,NTF3,OLFM1,PDZRN3,PLP1,PRRT1,SCN2B,SCN4A,SLC7A11
Demyelination of nerves	0.00459	ARSA,GJB1,MYRF,PLP1
Mild
Schizophrenia	1.18e-16	ABCB1,ACSBG1,ADGRF4,ADRA1B,ADRA1D,ADRA2B,ADRA2C,AMPH,APOA1,APOA4,APOB,ATP1A2,ATP1A4,ATP2B2,ATP4A,ATP4B,BPIFC,C4A/C4B,CA1,CA13,CA5A,CA7,CA9,CACNA1G,CACNA1H,CAD,CALY,CAP2,CCDC60,CCK,CCKAR,CHI3L1,CHRM1,CHRM5,CHRNA1,CHRNA2,CHRNA5,CHRNA9,CHRNB4,CHRNG,CLDN11,CNR1,COL3A1,CPLX2,CRHBP,CSMD1,CYP2D6,CYP2E1,CYP3A4,CYP3A5,DAB1,DAO,DDR1,DLG2,DRD1,DRD2,DRD5,DRP2,E2F1,EGFR,ERBB4,FABP7,FAM3D,FCGR2A,FCGR3A/FCGR3B,…
Motor dysfunction or movement disorder	5.98e-14	ABCB1,ACP1,ACTN2,ACTN3,ADH1C,ADORA1,ADORA3,ADRA1B,ADRA1D,ADRA2B,ADRA2C,AEBP1,AHR,ALAS2,ALB,AMY2A,APLP1,APOA4,AQP1,AQP4,ARL3,ARR3,ARX,ASPA,ATL1,ATP1A2,ATP2B2,ATP2B3,ATP8A2,AVPR2,BBOX1,BCAP31,BCAS1,BCL2,BGN,BHLHE22,BRCA2,BRSK1,C4A/C4B,C9,CA1,CA13,CA5A,CA7,CA9,CAB39,CACNA1D,CACNA1G,CACNA1H,CASP2,CASQ1,CASQ2,CCL11,CCL4,CCL5,CCR10,CD160,CD38,CD74,CDCP2,CDH11,CDH18,CDKN1C,CDR1,CFLAR,CFTR,CHAF1B,CHGA,CH…
Movement Disorders	3.93e-13	ABCB1,ACP1,ACTN2,ACTN3,ADH1C,ADORA1,ADORA3,ADRA1B,ADRA1D,ADRA2B,ADRA2C,AEBP1,AHR,ALAS2,ALB,AMY2A,APLP1,APOA4,AQP1,AQP4,ARL3,ARR3,ARX,ASPA,ATL1,ATP1A2,ATP2B2,ATP2B3,ATP8A2,AVPR2,BBOX1,BCAP31,BCAS1,BCL2,BGN,BHLHE22,BRSK1,C4A/C4B,C9,CA1,CA13,CA5A,CA7,CA9,CAB39,CACNA1D,CACNA1G,CACNA1H,CASP2,CASQ1,CASQ2,CCL11,CCL4,CCL5,CCR10,CD160,CD38,CD74,CDCP2,CDH11,CDH18,CDKN1C,CDR1,CFLAR,CFTR,CHAF1B,CHGA,CHI3L1,C…
Combined
Schizophrenia	1.81e-07	ABCB1,ACSBG1,ADGRF4,ADRA1D,APOA4,ATP1A2,ATP2B2,ATP4A,ATP4B,CA1,CA13,CA5A,CA7,CACNA1G,CACNA1H,CAD,CAP2,CCKAR,CHRNA1,CHRNA5,CHRNA9,CHRNG,CLDN11,CNR1,CPLX2,CRHBP,CYP2D6,CYP2E1,CYP3A4,CYP3A5,DAB1,DDR1,DLG2,DRD1,EGFR,ERBB4,FABP7,FAM3D,FCGR3A/FCGR3B,FSHB,GABRA5,GABRA6,GABRD,GABRE,GABRG3,GABRP,GABRR1,GFAP,GLRX,GRIK1,GRIK5,GRIN3A,GRM4,HTR3A,HTR3D,HTR5A,HTR6,INS,KCNQ1,LOC102724788/PRODH,MAGEC1,MEST,MPDZ,M…
Developmental disorders (Severely language impaired only)	p-value*	Genes
Autism or intellectual disability	0.00331	ABCA4,BCAP31,BCORL1,EPB41L1,FCGR3A/FCGR3B,FMR1,PAX6,PDZK1,PHF8,POLR3C,SLC1A7,SLC9A6,TFAP2A,UBE2A,UHMK1
Autism spectrum disorder or intellectual disability	0.00367	ABCA4,BCAP31,BCORL1,EPB41L1,FCGR3A/FCGR3B,FMR1,LDHD,NEFL,PAX6,PDZK1,PHF8,POLR3C,SLC1A7,SLC9A6,TFAP2A,UBE2A,UHMK1
Dystrophy of muscle	0.00551	CAV3,COL6A3,DPT,EMD,F10,MYH7,NHLH2,SGCG,SLC1A7,TMEM43
*Fisher exact p-value representing the probability that the indicated function is not over-represented among the DMGs for each group, using all genes in IPA's Knowledgebase as the reference gene set.
