# Supplementary material for: Phenotypic Subtyping and Re-Analysis of Existing Methylation Data from Autistic Probands in Simplex Families Reveal ASD Subtype-Associated Differentially Methylated Genes and Biological Functions
Source: Int J Mol Sci. 2020 Sep 19;21(18):6877. doi: 10.3390/ijms21186877 (PMC7555936; doi:10.3390/ijms21186877)
Supplement: Supplementary file 1 [file ijms-21-06877-s001.zip › ijms-927106-supplementary/Suppl. Materials_revised MS/Table S7. ADIR items and score adjustments used for cluster analyses.xlsx]

## Sheet: Sheet1
ADI-R ITEMS AND SCORE MODIFICATIONS*
4 ® 3; 7, 8 & 9 ® blank			8 & 9 ® blank			9 ® blank
CVISSP / EVISSP	106¶		CARTIC / ARTIC5	14		CUNPROC / EUNPROC	71
CMEM / EMEM	107		CSTEREO / ESTEREO	18		CCRIT / ECRIT	75
CMUSIC / EMUSIC	108		CCHAT / CHAT5	16		CUNSENS / EUNSENS	77
CDRAW / EDRAW	109		CPOINT / POINT5	30		CNOISE / ENOISE	36
CREAD / EREAD	110		CNOD / NOD5	32		CABINAR / EABINR	78
CCOMPU / ECOMPU	111		CHSHAKE / HSHAKE5	33		CCHANGE / ECHANGE	73
COMPSL / COMSL5	34A		CINSGES / INSGES5	31		CRESIS / ERESIS	74
			AVOICE5	24		COTHMAN / EOTHMAN	84
			CPLAY / PLAY5	63		CMLHAND / EMLHAND	82
7 & 8 ® 3; 9 ® blank			CPEERPL / PEERPL5	64		CAGGFAM / EAGGFAM	91B
CPRON / EPRON	23		GAZE5	42		CAGGOTH / EAGGOTH	91C
			CSSMILE / SSMILE5	43		CSLFINJ / ESLFINJ	90
			CSHOW / SHOW5	45		CHVENT / EHVENT	80
7 ® 1; 8 ® 3; 9 ® blank			COSHARE / OSHARE5	46
CINR / EINR	26		CSHARE / SHARE5	47
CUSEOBJ / EUSEOBJ	72		COCOMF / OCOMF5	49		8 ® 3; 9 ® blank
			CQUALOV / QUALOV5	51		CCONVER / CONVER5	20
			CRFACEX / RFACEX5	52		CINAPPQ / EINAPPQ	22
7 ® 2; 9 ® blank			CQRESP / QRESP5	57		CNEOID / ENEOID	24
CFAINT / EFAINT	92		CSOPLAY / SOPLAY5	65		CVERRIT / EVERRIT	25
			CINTCH / INTCH5	66		CSPEECH / SPEECH5	28
			CRESPCH / RESPCH5	67		CINAPFE / INAPFE5	53
8 ® 3			CGRPLAY / GRPLAY5	68		CFRIEND / FREND15	69
CUSEBOD / EUSEBOD	11		CSOCDIS / SOCDIS5	56
			CCIRINT / ECIRNIT	70
			CHFMAN / EHFMAN	81		7 ® 1; 6 ® 3; 9 ® blank
LEVELL	19		CGAIT / GAIT5	86		CUATT / EUATT	76
NOTE: if item 19 has a score of 1 or 2 , items 20-28 are scored as 3			CINITIA / INITIA5	61
			CIMIT / IMIT5	29		all -1 become blank
*As previously described by Hu and Steinberg [16]
¶Item number on ADI-R
