# Supplementary material for: Phenotypic Subtyping and Re-Analysis of Existing Methylation Data from Autistic Probands in Simplex Families Reveal ASD Subtype-Associated Differentially Methylated Genes and Biological Functions
Source: Int J Mol Sci. 2020 Sep 19;21(18):6877. doi: 10.3390/ijms21186877 (PMC7555936; doi:10.3390/ijms21186877)
Supplement: Supplementary file 1 [file ijms-21-06877-s001.zip › ijms-927106-supplementary/Suppl. Materials_revised MS/Table S9. Over-represented neurological functions_all groups.xlsx]

## Sheet: Sheet1
Nervous system development and function	p-value*	Genes
Severely language impaired (n=22)
Abnormal morphology of neurons	0.000221	ATP2B2,CABP4,CCL11,CETN2,CHRNG,CORT,CRMP1,EFNB1,FMR1,KCNQ1,NEFL,NOS3,OPN4,PAX6,PAX8,PLAT,PVALB,RAG1,SHANK1
Sensorimotor integration	0.00339	ADAMTS13,PAX6
Neuritogenesis	0.00352	CCN1,CRMP1,DDR1,DOCK1,EFNB1,ELK1,FLRT1,FMR1,GRM4,NEFL,NEU4,NNMT,PAX6,PLAT,PVALB,RAB33A,SLC9A6,THY1,UHMK1
Maturation of synapse	0.00425	FMR1,NEFL,SHANK1
Size of neurites	0.00609	CADM1,NEFL
Branching of neurites	0.00631	CCN1,CRMP1,DOCK1,EFNB1,ELK1,FMR1,NEFL,NNMT,PLAT,PVALB,SLC9A6
Maturation of dendritic spines	0.00715	EFNB1,FMR1
Development of neurons	0.00924	CADM1,CCN1,CDH9,CRMP1,DDR1,DOCK1,EFNB1,ELK1,FLRT1,FMR1,GRM4,NEFL,NEU4,NNMT,PAX6,PLAT,PVALB,RAB33A,SHANK1,SLC9A6,THY1,UHMK1
Intermediate (n=121)
Activation of neuroglia	7.35e-05	C1QA,CCL11,CCL22,CDK11A,CSF2,CTNNB1,FGF1,GJB1,NOS3,PLAT,SMPD3
Activation of astrocytes	0.000477	C1QA,CCL11,CDK11A,CTNNB1,FGF1,SMPD3
Abnormal morphology of neurons	0.00122	ADAMTS4,ARSA,ATP2B2,C1QA,CABP4,CCL11,CORT,DCLK1,GBX2,GJB1,KCNQ1,NEFL,NOS3,NTF3,OPN4,PAX8,PLAT,PLP1,RHO,SERPINA3,SORBS2
Abnormal morphology of axons	0.00127	ARSA,CORT,DCLK1,GJB1,NEFL,NTF3,PLP1
Abnormal morphology of neurites	0.00148	ARSA,CORT,DCLK1,GJB1,NEFL,NTF3,PLP1,SERPINA3,SORBS2
Loss of neurites	0.00291	CORT,GJB1,NTF3,SERPINA3
Mild (n=149)
Abnormal morphology of nervous system	4.34e-15	AATK,ABCA4,ABCB5,ABR,ACTL6B,ADAMTS4,ADCY1,ADH7,ADIPOQ,AGT,AIPL1,ALX1,APOB,ARSG,ARX,ASPA,ATP1A2,ATP2B2,ATP8A2,B4GALT1,BBS7,BCAS1,BCL2,BHLHE22,BMP4,BMPR1B,BRCA2,BRD7,BRSK1,C1QA,C5AR1,CABP4,CACNA1D,CADPS,CAMKK1,CASP2,CAT,CCKAR,CCL11,CCL5,CCND1,CCR10,CCR6,CD40LG,CD80,CDH11,CDK20,CDKN2A,CELSR3,CFH,CHRM1,CHRNA1,CHRNG,CKMT1A/CKMT1B,CLCN6,CLDN19,CLN5,CLRN1,CNGA2,CNGA3,CNR1,CNTN4,CNTN6,CNTNAP2,COL18A1,COL…
Sensory system development	7.77e-15	ABCA4,ABCB5,ABCC6,ADCY1,AIPL1,AIRE,ALDH1A2,ALKBH1,ALOX15,APOB,AQP1,AQP5,ARL3,ARSB,ARSG,ASPA,ATP2B2,ATP8A2,BBS1,BBS7,BCL9L,BFSP2,BLOC1S3,BMP4,BMP6,BMPR1B,BRD1,C5AR1,CABP4,CCL1,CCL2,CCND1,CD36,CDH5,CDHR1,CDK20,CDKN2A,CFH,CNGA3,CNGB3,COL18A1,COL1A1,COL8A1,COL8A2,CPLX4,CRX,CRYAA/CRYAA2,CRYAB,CRYBA1,CRYBA4,CRYBB2,CRYGA,CRYGB,CRYGC,CSPG4,CXCR3,DIO3,DLX1,DNMT3A,DPT,DSC1,E2F1,EGFR,ELOVL4,EMX1,ENTPD3,EOME…
Combined case group (n=292)
Abnormal morphology of nervous system	4.37e-11	AATK,ABCA4,ABCB5,ACTL6B,ADAMTS4,ADCY1,ADIPOQ,AGT,AIPL1,ARSA,ARSG,ARX,ASPA,ATP1A2,ATP2B2,ATP8A2,BBS7,BCL2,BRCA1,BRCA2,BRD7,C1QA,C5AR1,CABP4,CAT,CCKAR,CCL11,CCL5,CCND1,CCR10,CCR6,CD80,CDH11,CDKN2A,CHRNA1,CHRNG,CLCN6,CLDN19,CNGA2,CNGA3,CNR1,CNTN4,CNTN6,CNTNAP2,CORT,CRMP1,CSF1R,CSPG4,CX3CR1,CYP19A1,DAB1,DCLK1,DLX1,DLX5,DNM3,DRD1,EDN3,EDNRA,EGFR,EPB41L1,ERBB4,F2,FASLG,FGF1,FGF22,FGF7,FGFR1,FMR1,FOLR1,…
Sensory system development	6.17e-09	ABCA4,ABCB5,ABCC6,ADCY1,AIPL1,AIRE,ALKBH1,AQP1,ARSG,ASPA,ATP2B2,ATP8A2,BBS1,BBS7,BFSP2,C5AR1,CABP4,CCL1,CCL2,CCND1,CD36,CDKN2A,CNGA3,CNGB3,COL8A1,CRYAB,CRYBA4,CRYBB2,CRYGA,CRYGB,CRYGC,CSPG4,CTNNB1,CX3CR1,CXCR3,DLX1,DPT,DSC1,EGFR,ELOVL4,ENTPD3,EOMES,FABP7,FASLG,FGF1,FGF7,FGFR1,FMR1,FOXE3,FOXL2,FST,FYCO1,GFRA1,GJA3,GNAT2,GRK1,GUCY2F,HIF3A,IL1R1,KRT12,KRT4,LCK,LCN2,LCTL,LHX2,LYVE1,MARCKSL1,METRN,MFR…
Abnormal morphology of neurons	2.26e-08	AATK,ACTL6B,ADAMTS4,ADIPOQ,AIPL1,ARSA,ARSG,ARX,ATP2B2,BCL2,BRCA2,BRD7,C1QA,C5AR1,CABP4,CAT,CCKAR,CCL11,CCL5,CCR10,CHRNA1,CHRNG,CLCN6,CNGA3,CNTN6,CNTNAP2,CORT,CRMP1,CYP19A1,DCLK1,DLX1,DLX5,DNM3,DRD1,EDN3,ERBB4,F2,FASLG,FGF22,FGF7,FMR1,FST,GAL3ST1,GBX2,GFAP,GFRA1,GJB1,GPM6B,GRIK2,GRIN3A,HOXB2,IGSF9,IL10,IL37,ISL1,KCNQ1,KEL,KIF5A,KLK8,LGI1,LHX3,LIFR,LZTS1,MMP3,MPZ,NDN,NEFH,NEFL,NKX6-1,NOS1,NOS3,NR1H…
Activation of neuroglia	4.27e-08	ABCA4,ADIPOQ,ADORA1,AGT,C1QA,C5AR1,CCL1,CCL11,CCL2,CCL21,CCL22,CCL5,CD36,CDK11A,CNGA3,CSF2,CTNNB1,CX3CR1,EGFR,F2,FASLG,FGA,FGF1,FGG,GFAP,GJB1,GJC2,IL10,IL1R1,LCN2,MYOD1,NOS3,NR4A1,NRG1,OSTM1,PDE6B,PDK4,PLAT,PTGER2,PTGER3,RDH8,SMPD3,SST,TRPM2,VTN
*Fisher exact p-value representing the probability that the indicated function is not over-represented among the DMGs for each group, using all genes in IPA's Knowledgebase as the reference gene set.
